# Supplementary material for: Self-sperm induce resistance to the detrimental effects of sexual encounters with males in hermaphroditic nematodes
Source: eLife. 2019 Jul 8;8:e46418. doi: 10.7554/eLife.46418 (PMC6697445; doi:10.7554/eLife.46418)
Supplement: Figure 2—source data 2. [file elife-46418-fig2-data2.xlsx]

## Sheet: Description
Output from GO enrichment using DEseq2 results as input
Each tab/sheet has the complete GO enrichment results for the differentially expressed genes for a given comparison and direction
For each differential expression comparison, there are two tabs/sheets (one for each direction of expression)
The experimental conditions are abbreviated in the following way:
1. the first letter is the genotype
	F = fem-1[q17]
	N = WT, N2
2. The number is the day that the mating occur
	** Note: the samples were collected 24 hours after mating so the ages of the worms at the time of collection are 1 day older (day 4 or 8 of life)
	3 = for mated C. elegans, mating occurred on day 3; animals frozen for RNA extraction on day 4 of life)
	7 = for mated C. elegans, mating occurred on day 7; animals frozen for RNA extraction on day 8 of life)
3. The last letter is whether or not the animal was mated
	M = C. elegans were mated on the day indicated (with him-5 males labeled with MitoTracker Red CMXRos) and only animals that received male sperm were used
	U = C. elegans never interacted with males but were cultured at the same density as mated animals
Example:
F3M up vs. N3M is the GO enrichment for genes that are more highly expressed by fem-1 feminized hermaphrodites that were mated on day 3 of life compared to N2 hermaphrodites that were mated on day 3 of life

## Sheet: N3U up vs. F3U
	p.values	FDR.BH	genes
GO.0005840..ribosome	1.5582e-16	8.28651e-13	mrpl-39, mrpl-4, rpl-28, mrpl-49, rpl-38, mrps-35, mrps-28, rps-24, mrpl-55, rpl-15, mrps-25, rps-28, mrps-21, rps-8, mrpl-1, rps-2, rps-5, mrpl-51, rps-23, rpl-29, mrps-7, mrpl-28, T14B4.2, F10E7.5, mrpl-14, mrpl-10, rpl-5, rpl-26, rpl-32, mrps-22, rps-9, mrpl-20, mrpl-37, rpl-17, mrpl-15, Y37E3.8, mrpl-17, rpl-13, mrpl-19, rps-10, rpl-24.1, rpl-19, mrpl-24, mrpl-23, rps-17, mrps-15, mrpl-54, rp…
GO.0002119..nematode.larval.development	5.12437e-14	1.36257e-10	cdc-25.2, ifc-1, lag-2, F32D1.5, skr-7, unc-62, B0238.11, pas-6, CD4.3, nstp-3, M03F8.3, atp-4, egl-46, lgc-54, unc-70, Y57E12AL.6, fat-7, hpo-9, mrpl-4, his-7, asns-1, T19A5.3, lron-2, C50F4.6, nstp-10, rbx-1, ZK856.11, pas-2, plrg-1, emo-1, F53B7.3, act-2, atp-5, T19B10.2, col-154, bir-1, ceh-27, ceh-32, snr-4, rpt-1, dpy-30, myo-3, tomm-20, sqt-3, rpl-28, mrpl-49, hpo-31, nrf-5, end-1, unc-39,…
GO.0006412..translation	8.51477e-13	1.50938e-09	ife-3, mrpl-4, elpc-3, rpl-28, mrpl-49, eif-3.K, rpl-38, ife-2, ife-4, rps-24, rpl-15, rps-28, Y41D4A.6, mrps-21, eif-1.A, rps-8, rps-2, ant-1.4, ant-1.3, sars-1, hars-1, rps-5, mrpl-51, rps-23, rpl-29, mrps-7, eef-1B.2, misc-1, eif-1, C17G10.9, T14B4.2, ppp-1, mrpl-14, ifg-1, eif-3.G, iff-2, rpl-5, rpl-26, rpl-32, eif-3.F, rps-9, mrpl-20, rpl-17, mrpl-15, eif-3.I, mrpl-17, rpl-13, eif-3.H, mrpl-…
GO.0030529..intracellular.ribonucleoprotein.complex	3.5351e-12	4.69991e-09	snr-4, rpl-28, mrpl-49, rpl-38, Y66H1A.4, rpl-15, mrps-25, rps-28, rps-8, rps-2, F08B4.7, rps-5, mrpl-51, rps-23, mrps-7, snr-1, mog-2, snr-3, F10E7.5, lsm-4, mrpl-14, rpl-5, rpl-26, rps-9, rpl-17, mrpl-15, F37F2.2, lsm-6, Y37E3.8, snr-7, rpl-13, mrpl-19, rpl-24.1, C44E4.4, rpl-19, mrpl-24, cey-3, cey-2, mrpl-23, rps-17, mrps-15, rps-19, snr-2, rpl-31, ubl-1, rps-12, rps-3, rps-13, mrps-17, rps-1…
GO.0003735..structural.constituent.of.ribosome	9.54613e-12	1.01533e-08	mrpl-4, rpl-28, mrpl-49, R186.8, rpl-38, mrps-35, rps-24, rpl-15, mrps-25, rps-28, mrps-21, rps-8, rps-2, ant-1.4, ant-1.3, rps-5, mrpl-51, rps-23, rpl-29, mrps-7, mrpl-28, misc-1, T14B4.2, mrpl-14, rpl-5, rpl-26, rpl-32, mrps-22, rps-9, mrpl-20, rpl-17, mrpl-15, Y37E3.8, mrpl-17, rpl-13, mrpl-19, rps-10, rpl-24.1, rpl-19, mrpl-24, mrpl-23, rps-17, mrps-15, rps-19, rpl-14, mrpl-34, rpl-30, mrpl-9…
GO.0004298..threonine.type.endopeptidase.activity	3.41514e-11	2.59453e-08	pas-6, pas-2, pas-1, pbs-1, pbs-3, pas-7, pbs-4, pas-3, pbs-7, pas-4, pas-5, pbs-2, pbs-5, pbs-6
GO.0005839..proteasome.core.complex	3.41514e-11	2.59453e-08	pas-6, pas-2, pas-1, pbs-1, pbs-3, pas-7, pbs-4, pas-3, pbs-7, pas-4, pas-5, pbs-2, pbs-5, pbs-6
GO.0042302..structural.constituent.of.cuticle	2.18314e-10	1.45124e-07	col-43, col-145, col-10, col-146, col-147, col-154, lon-3, sqt-3, cut-2, dpy-3, col-165, col-166, col-167, col-168, col-170, dpy-7, col-174, col-182, col-104, col-105, col-107, col-109, dpy-13, col-33, col-14, col-117, col-3, col-121, col-125, col-130, dpy-4, col-74, dpy-10, dpy-2, rol-8, col-77, col-39, ram-2, sqt-1, col-48, col-58, dpy-14, col-65, col-89, dpy-17, col-90, col-91, col-97
GO.0009792..embryo.development.ending.in.birth.or.egg.hatching	6.87423e-10	4.06191e-07	ife-3, cmd-1, cdc-25.2, knl-3, ifc-1, F32D1.5, skr-7, unc-62, pgl-3, F26G5.1, pas-6, CD4.3, memb-2, nstp-3, M03F8.3, rpt-2, atp-4, unc-70, srg-31, C33G8.2, tofu-2, Y57E12AL.6, fat-7, hpo-9, clic-1, pos-1, mrpl-4, his-7, magu-2, C50F4.6, nstp-10, col-146, col-147, rbx-1, her-1, ZK856.11, pas-2, plrg-1, emo-1, F53B7.3, act-2, atp-5, K10D6.2, clec-222, col-154, bir-1, ceh-27, ceh-32, snr-4, rpt-1, d…
GO.0000502..proteasome.complex	1.26239e-09	6.7134e-07	pas-6, rpt-2, pas-2, rpt-1, pas-1, pbs-1, rpn-7, rpt-4, rpn-5, pbs-3, pas-7, rpn-12, usp-14, pbs-4, pas-3, rpt-5, pbs-7, pas-4, pas-5, pbs-2, pbs-5, rpt-3, pbs-6
GO.0003723..RNA.binding	6.92977e-09	3.35023e-06	ife-3, K10C9.3, pgl-3, mrpl-4, ZK287.7, ZK856.11, B0024.11, eif-3.K, gut-2, hpo-31, nxf-2, rpl-38, ife-2, ife-4, fox-1, Y66H1A.4, Y69A2AR.32, eif-1.A, H35B03.2, C11D2.7, lsm-8, exos-2, cdd-2, mrpl-1, rsp-6, rps-2, F08B4.7, T11G6.8, exos-4.1, lsm-3, snr-1, C50D2.5, nol-1, prp-21, K07E8.7, mog-2, EEED8.12, EEED8.4, tofu-6, snr-3, ZK1127.5, lsm-4, ifg-1, hel-1, eif-3.G, T13H5.4, iff-2, rpl-5, E02H1.…
GO.0005581..collagen.trimer	1.84489e-08	8.17596e-06	col-43, col-145, col-10, col-146, col-147, col-154, lon-3, sqt-3, col-165, col-166, col-167, col-168, col-170, dpy-7, col-174, col-182, col-104, col-105, col-107, col-109, dpy-13, col-33, col-14, col-117, col-121, col-125, col-130, col-131, col-135, col-74, dpy-10, dpy-2, rol-8, col-77, col-39, sqt-1, col-48, col-56, col-58, dpy-14, col-65, col-89, col-90, col-91, col-97
GO.0010171..body.morphogenesis	2.05738e-08	8.41627e-06	cdc-25.2, ifc-1, skr-7, unc-62, nstp-3, col-154, ceh-27, ceh-32, dpy-30, lon-3, myo-3, sqt-3, bus-19, lsy-27, grdn-1, ifd-2, dpy-3, aps-2, bus-8, unc-97, hbl-1, ptr-4, hsp-3, col-166, col-167, col-168, col-170, sox-2, dpy-7, sex-1, lpr-5, tni-1, sdc-2, hnd-1, nhr-25, cdk-4, C11H1.3, ifa-3, pat-9, fnta-1, W09G12.3, Y69A2AR.32, ced-10, dpy-13, lam-1, glf-1, arf-3, his-31, col-117, col-3, ant-1.3, c…
GO.0006511..ubiquitin.dependent.protein.catabolic.process	1.24597e-07	4.73292e-05	skr-14, skr-7, pas-6, ubh-3, pas-2, rpt-1, pas-1, skr-20, skr-21, C06G3.6, skr-16, skr-10, skr-13, skr-9, skr-8, skr-12, skr-15, npl-4.1, skr-17, ubh-4, pas-7, pas-3, pas-4, skr-2, pas-5, apc-2, ubc-7
GO.0000786..nucleosome	4.03267e-07	0.000142971	his-7, his-3, hil-3, his-24, hil-2, hil-7, his-61, his-62, his-60, his-59, his-31, his-47, his-48, his-45, his-55, his-57, his-66, his-65, his-63, his-64, hil-8, his-67, his-68, cpar-1
GO.0003743..translation.initiation.factor.activity	7.54601e-07	0.000236057	ife-3, ZK856.11, eif-3.K, ife-2, ife-4, eif-1.A, eif-1, C17G10.9, ppp-1, ifg-1, eif-3.G, eif-3.F, eif-3.I, eif-3.H, iftb-1, eif-3.C, eif-3.E, eif-6, eif-3.D, ZK1098.4, iff-1
GO.0006413..translational.initiation	7.3731e-07	0.000236057	ife-3, ZK856.11, eif-3.K, ife-2, ife-4, eif-1.A, eif-1, C17G10.9, ppp-1, ifg-1, eif-3.G, eif-3.F, eif-3.I, eif-3.H, iftb-1, eif-3.C, eif-3.E, eif-6, F57B9.3, eif-3.D, ZK1098.4, iff-1
GO.0006446..regulation.of.translational.initiation	5.65733e-06	0.00164877	eif-3.K, C17G10.9, eif-3.G, eif-3.F, eif-3.I, eif-3.C, eif-3.E, Y47H9C.7, eif-3.D, ZK1098.4
GO.0019773..proteasome.core.complex..alpha.subunit.complex	5.89068e-06	0.00164877	pas-6, pas-2, pas-1, pas-7, pas-3, pas-4, pas-5
GO.0000003..reproduction	8.70858e-06	0.00231561	F48G7.5, fbxb-72, sti-1, cmd-1, cdc-25.2, knl-3, cpg-8, B0238.11, pas-6, M03F8.3, rpt-2, atp-4, Y57E12AL.6, fat-7, vha-18, mrpl-4, his-7, asns-1, C50F4.6, nstp-10, ZK287.1, rbx-1, ZK856.11, plrg-1, emo-1, F53B7.3, act-2, atp-5, ceh-27, snr-4, rpt-1, dpy-30, myo-3, tomm-20, sqt-3, R186.8, fmi-1, gut-2, end-1, pas-1, rpoa-12, ril-1, ccnk-1, daf-21, rpl-38, his-3, Y102A5C.6, csn-1, wars-1, mrps-35, …
GO.0000398..mRNA.splicing..via.spliceosome	2.40455e-05	0.00592214	plrg-1, gut-2, lsm-8, rsp-6, F08B4.7, lsm-3, C50D2.5, mog-2, dpy-10, hel-1, T13H5.4, rsp-7, let-858, rsp-2, rsp-1, lsm-6, snr-7, ubl-5, ncbp-2, snr-2, Y82E9BR.2, rnp-7, K04G7.11, snu-23, snr-5, C07A9.2
GO.0016282..eukaryotic.43S.preinitiation.complex	2.44993e-05	0.00592214	eif-3.K, C17G10.9, eif-3.G, eif-3.F, eif-3.I, eif-3.H, eif-3.C, eif-3.E, eif-3.D
GO.0071013..catalytic.step.2.spliceosome	3.24852e-05	0.00751114	M03F8.3, plrg-1, F53B7.3, snr-4, gut-2, lsm-3, snr-1, C50D2.5, prp-21, snr-3, let-858, snr-7, snr-2, Y82E9BR.2, K04G7.11, snr-5, elpc-2
GO.0006915..apoptotic.process	3.57003e-05	0.00791059	skr-7, K11D12.6, ceh-34, pas-6, atp-4, rbx-1, snr-4, R186.8, egl-1, bmk-1, daf-21, sel-12, sav-1, dct-1, ced-8, abl-1, nhr-25, hpl-1, his-24, rab-6.2, rpl-15, rps-28, pbs-1, ced-10, pcn-1, ubc-9, tkr-3, rps-8, his-61, arp-11, rps-2, rpn-7, egl-38, rps-5, his-47, his-57, his-65, rps-23, csn-6, noah-2, snr-1, misc-1, T02H6.11, eif-1, T27F7.4, cct-1, ifg-1, hel-1, evl-20, rpl-26, tomm-40, atad-3, rp…
GO.0040011..locomotion	3.78979e-05	0.00806164	knl-3, F59B1.8, unc-62, pas-6, nstp-3, M03F8.3, crt-1, lgc-54, unc-70, fat-7, mrpl-4, his-7, asns-1, C50F4.6, nstp-10, rbx-1, unc-42, plrg-1, act-2, T19B10.2, col-154, bir-1, ceh-32, snr-4, dpy-30, vab-8, myo-3, sqt-3, nasp-2, gut-2, end-1, unc-39, pas-1, ccnk-1, daf-21, his-3, slo-1, grdn-1, wars-1, Y60A3A.9, prmt-1, grd-2, mlt-11, F53F8.3, B0310.6, F13C5.2, C44C1.1, unc-1, dpy-3, hid-1, wrt-2, …
GO.0004175..endopeptidase.activity	6.28808e-05	0.0123068	pas-6, pas-2, pas-1, grd-2, sel-12, pbs-1, pas-7, pas-3, pas-4, pas-5, pbs-2, pbs-5
GO.0046982..protein.heterodimerization.activity	6.71111e-05	0.0123068	his-7, his-3, taf-11.1, his-61, his-62, his-60, his-59, his-31, his-47, his-48, his-45, his-55, his-57, his-66, his-65, his-63, his-64, taf-6.1, hlh-2, his-67, his-68, cpar-1, ced-9, taf-11.3
GO.0001731..formation.of.translation.preinitiation.complex	6.68936e-05	0.0123068	eif-3.K, C17G10.9, eif-3.G, eif-3.F, eif-3.I, eif-3.H, eif-3.C, eif-3.E, eif-3.D
GO.0033290..eukaryotic.48S.preinitiation.complex	6.68936e-05	0.0123068	eif-3.K, C17G10.9, eif-3.G, eif-3.F, eif-3.I, eif-3.H, eif-3.C, eif-3.E, eif-3.D
GO.0008380..RNA.splicing	8.69078e-05	0.0154059	snr-4, rsp-6, F32B6.3, snr-1, C50D2.5, snr-3, lsm-4, hel-1, rsp-7, let-858, rsp-2, rsp-1, lsm-6, snr-7, ncbp-2, snr-2, K04G7.11, snr-5, rsp-3
GO.0031595..nuclear.proteasome.complex	0.000150987	0.0259016	rpt-2, rpt-1, rpt-4, rpn-5, rpt-5, F56F11.4, rpt-3
GO.0016998..cell.wall.macromolecule.catabolic.process	0.000184123	0.0296718	T05H4.7, C08B6.4, lys-4, lys-5, lys-6
GO.0017183..peptidyl.diphthamide.biosynthetic.process.from.peptidyl.histidine	0.000184123	0.0296718	dph-3, dph-2, B0491.7, E01A2.5, dph-1
GO.0005762..mitochondrial.large.ribosomal.subunit	0.000203913	0.0318944	mrpl-49, R186.8, mrpl-51, mrpl-28, mrpl-15, mrpl-17, mrpl-19, mrpl-23, mrpl-34, mrpl-16, R02F2.9
GO.0022625..cytosolic.large.ribosomal.subunit	0.000302231	0.0457688	rpl-28, rpl-38, rpl-15, rpl-29, rpl-5, rpl-26, rpl-32, Y37E3.8, rpl-13, rpl-24.1, rpl-19, rpl-14, rpl-30, rpl-31, C16A3.4, rpl-36, rpl-6, rpl-21
GO.0022627..cytosolic.small.ribosomal.subunit	0.00030983	0.0457688	rps-24, rps-28, rps-8, rps-5, rps-23, rps-9, rps-10, rps-17, rps-19, rps-20, rps-12, rps-13, rps-14
GO.0071011..precatalytic.spliceosome	0.000359048	0.0503506	M03F8.3, plrg-1, snr-4, gut-2, lsm-3, snr-1, C50D2.5, snr-3, snr-7, Y82E9BR.2, rnp-7
GO.0005686..U2.snRNP	0.000359782	0.0503506	snr-4, R10D12.13, snr-1, C50D2.5, prp-21, mog-2, snr-3, snr-7, snr-2, Y82E9BR.2
GO.0005852..eukaryotic.translation.initiation.factor.3.complex	0.000636189	0.0781923	eif-3.K, C17G10.9, eif-3.G, eif-3.F, eif-3.I, eif-3.H, eif-3.C, eif-3.E, eif-3.D
GO.0005685..U1.snRNP	0.000636189	0.0781923	snr-4, F08B4.7, snr-1, snr-3, snr-7, snr-2, Y119D3B.12, rnp-7, snr-5
GO.0003796..lysozyme.activity	0.000661649	0.0781923	ilys-5, ilys-3, ilys-2, lys-4, lys-5, lys-6
GO.0031597..cytosolic.proteasome.complex	0.000661649	0.0781923	rpt-2, rpt-1, rpt-4, rpt-5, F56F11.4, rpt-3
GO.0036402..proteasome.activating.ATPase.activity	0.000661649	0.0781923	rpt-2, rpt-1, rpt-4, rpt-5, F56F11.4, rpt-3
GO.0045899..positive.regulation.of.RNA.polymerase.II.transcriptional.preinitiation.complex.assembly	0.000661649	0.0781923	rpt-2, rpt-1, rpt-4, rpt-5, F56F11.4, rpt-3
GO.1901800..positive.regulation.of.proteasomal.protein.catabolic.process	0.000661649	0.0781923	rpt-2, rpt-1, rpt-4, rpt-5, F56F11.4, rpt-3
GO.0001764..neuron.migration	0.000734435	0.0849071	egl-46, vab-8, unc-39, mig-2, pix-1, eor-2, slt-1, hch-1, ced-10, ham-1, hlh-14, kal-1, ceh-10
GO.0018996..molting.cycle..collagen.and.cuticulin.based.cuticle	0.000764477	0.0864998	pas-6, M03F8.3, T19A5.3, plrg-1, emo-1, F53B7.3, T19B10.2, pas-1, grd-2, mlt-11, nas-38, mam-1, wrt-2, calu-1, acn-1, bus-8, ptr-4, nhr-25, C11H1.3, hch-1, daf-6, mlt-9, rpl-15, F38A1.8, rps-28, Y41D4A.6, grd-10, glf-1, arf-3, rpn-7, T11G6.8, rps-23, noah-2, mlt-8, dmd-5, vps-32.1, wrt-1, T13H5.4, rpl-32, pas-7, atad-3, let-858, ptr-18, cacn-1, tag-297, icd-2, vps-4, cars-1, cpz-1, rps-10, ptr-10…
GO.0097500..receptor.localization.to.nonmotile.primary.cilium	0.000940047	0.102024	mks-5, daf-25, arl-13, unc-101, odr-4
GO.0071010..prespliceosome	0.000940047	0.102024	M03F8.3, F08B4.7, snr-1, snr-3, K04G7.11
GO.0045263..proton.transporting.ATP.synthase.complex..coupling.factor.F.o.	0.00102889	0.109433	asg-2, R53.4, asg-1, Y82E9BR.3
GO.0007281..germ.cell.development	0.0014029	0.146286	cdc-25.2, tut-2, F53B7.3, snr-4, gut-2, C43H6.4, hsp-3, hpl-1, his-24, rps-28, arf-3, rpn-7, F32B6.3, hars-1, T11G6.8, exos-4.1, prp-21, cct-3, mog-2, rbbp-5, snr-3, lsm-4, cct-1, ifg-1, T13H5.4, let-858, cacn-1, smo-1, riok-1, rnp-6, ncbp-2, lmn-1, tba-2, smr-1, hsp-60, asb-1, rnp-7, K04G7.11, snu-23, cpar-1, baf-1, C07A9.2, cdk-1, hpl-2, rnf-113, pen-2, lis-1
GO.0009986..cell.surface	0.00171994	0.172578	wrt-8, sul-1, sdn-1, eat-20, wrt-1, plx-2, mab-20, kal-1, zmp-1, glr-1
GO.0032543..mitochondrial.translation	0.00171994	0.172578	Y41D4A.6, mrps-21, hars-1, mrpl-51, mrps-7, mrpl-23, mrps-15, mrpl-16, mrps-17, mrps-18A
GO.0040035..hermaphrodite.genitalia.development	0.00181042	0.178293	knl-3, unc-62, B0238.11, rbx-1, F53B7.3, act-2, atp-5, end-1, ccnk-1, daf-21, rpl-38, csn-1, grdn-1, F09F9.4, acn-1, bus-8, hbl-1, sox-2, ref-2, sex-1, sdc-2, cdk-4, C11H1.3, eat-20, fnta-1, csn-4, cct-8, mdf-2, ced-10, R08C7.4, ubc-9, csn-5, sams-3, sams-5, ruvb-2, his-61, his-62, col-14, arf-3, ant-1.3, F25H8.2, T11G6.8, his-48, his-66, his-65, rps-23, mdt-9, sams-2, rpoa-49, prp-21, fbxb-41, c…
GO.0042335..cuticle.development	0.00191548	0.185209	C16D9.1, T23F1.5, H42K12.3, calu-1, ZC449.1, H03E18.1, noah-2, T26C5.2, noah-1
GO.0051603..proteolysis.involved.in.cellular.protein.catabolic.process	0.0021365	0.202891	pas-6, tag-196, pas-2, pas-1, pbs-1, pbs-3, pas-7, cpz-1, pbs-4, pas-3, pbs-7, pas-4, pas-5, pbs-2, pbs-5, pbs-6
GO.0000276..mitochondrial.proton.transporting.ATP.synthase.complex..coupling.factor.F.o.	0.00280209	0.256923	atp-4, atp-5, asg-2, asg-1, asb-1
GO.0044765..single.organism.transport	0.00280209	0.256923	lpr-7, lpr-3, lpr-6, lpr-5, lpr-4
GO.0051082..unfolded.protein.binding	0.00305502	0.275366	hsp-16.2, crt-1, daf-21, cct-8, pfd-4, K07E8.6, cct-3, pfd-2, cct-1, dnj-13, pfd-6, cct-5, pfd-5
GO.0046540..U4.U6.x.U5.tri.snRNP.complex	0.00344033	0.299929	snr-4, gut-2, lsm-8, F32B6.3, lsm-3, lsm-6, snr-2, snu-23
GO.0022404..molting.cycle.process	0.00344033	0.299929	C16D9.1, T23F1.5, H42K12.3, ZC449.1, H03E18.1, noah-2, T26C5.2, noah-1
GO.0017025..TBP.class.protein.binding	0.0035699	0.306205	rpt-2, rpt-1, rpt-4, rpt-5, F56F11.4, rpt-3
GO.0000387..spliceosomal.snRNP.assembly	0.0036731	0.310057	snr-4, F08B4.7, icln-1, T11G6.8, snr-1, snr-3, lsm-4
GO.0042329..structural.constituent.of.collagen.and.cuticulin.based.cuticle	0.00440796	0.360639	lon-3, dpy-10, dpy-2, sqt-1
GO.0003785..actin.monomer.binding	0.00440796	0.360639	gsnl-1, pfn-3, tth-1, pfn-1
GO.0007538..primary.sex.determination	0.00574762	0.449498	ceh-39, fox-1, sex-1
GO.0005763..mitochondrial.small.ribosomal.subunit	0.00569209	0.449498	mrps-35, mrps-28, mrps-21, mrps-7, T14B4.2, mrps-22, mrps-15, mrps-17, mrps-9, mrps-18A
GO.0034715..pICln.Sm.protein.complex	0.00574762	0.449498	icln-1, snr-1, snr-3
GO.0008180..COP9.signalosome	0.0063695	0.477085	csn-1, csn-4, csn-5, csn-6, csn-2
GO.0006334..nucleosome.assembly	0.00621854	0.477085	hil-3, his-24, hil-2, hil-7, his-66, chaf-2, hil-8
GO.0000974..Prp19.complex	0.0063695	0.477085	M03F8.3, plrg-1, F53B7.3, T11G6.8, K04G7.11
GO.0000028..ribosomal.small.subunit.assembly	0.00666866	0.492555	rps-5, mrps-7, rps-10, rps-17, rps-19, rps-14
GO.0007369..gastrulation	0.0069285	0.504737	kin-33, sdz-31, end-3, glo-3, ced-10, sdz-28, let-858, mom-5, vet-6
GO.0006397..mRNA.processing	0.00775186	0.557087	snr-4, gut-2, rsp-6, snr-1, C50D2.5, snr-3, ssup-72, lsm-4, hel-1, cpf-1, rsp-7, let-858, rsp-2, rsp-1, lsm-6, snr-7, ncbp-2, snr-2, K04G7.11, snr-5, rsp-3
GO.0006898..receptor.mediated.endocytosis	0.00825911	0.578968	cmd-1, cdc-25.2, knl-3, lag-2, B0238.11, CD4.3, ppt-1, fat-7, mrpl-4, ZK856.11, ceh-22, act-2, snr-4, myo-3, R186.8, gut-2, hpo-31, rpoa-12, ccnk-1, grdn-1, unc-97, mup-2, lpr-5, Y66H1A.4, cct-8, mrps-21, eif-1.A, H35B03.2, sams-5, ruvb-2, rps-8, mrpl-1, his-31, syx-4, ant-1.4, F08B4.7, col-117, col-3, icln-1, ant-1.3, npp-1, F25H8.2, hars-1, col-125, par-5, mrpl-51, Y62E10A.2, snr-1, rpoa-49, to…
GO.0005634..nucleus	0.00838295	0.578968	W03F9.1, nhr-270, tag-304, nhr-158, unc-62, ceh-34, pas-6, rpt-2, ceh-49, egl-46, nhr-161, Y57E12AL.6, his-7, rbx-1, unc-42, ZK856.11, B0024.11, ceh-22, pas-2, bir-1, ceh-27, ceh-32, snr-4, rpt-1, elpc-3, dpy-30, cky-1, zip-5, end-1, end-3, unc-39, nxf-2, pas-1, rpoa-12, ccnk-1, T01C3.2, prde-1, nhr-50, his-3, nhr-218, nhr-127, csn-1, chk-2, dcs-1, nrde-3, B0310.2, sel-12, ceh-39, fox-1, fkh-2, t…
GO.0007154..cell.communication	0.00834452	0.578968	lag-2, wrt-8, grd-2, dsl-2, dsl-1, ncx-3, dsl-6, wrt-1
GO.0006457..protein.folding	0.00924561	0.630361	crt-1, cyn-1, daf-21, cyn-3, cyn-8, cct-8, cyn-12, C06A6.5, fkb-1, pfd-4, K07E8.6, cct-3, pfd-2, cct-1, cyn-11, dnj-13, txl-1, pfd-6, M04D5.1, fkb-2, cyn-6, cct-5, pfd-5, Y49E10.4
GO.0005739..mitochondrion	0.0105173	0.685526	F21C10.10, C08B6.8, tomm-20, mrpl-49, nuaf-1, cyn-1, egl-1, immt-2, B0250.5, asg-2, dct-1, sfxn-1.5, got-1.2, mrpl-55, mrps-25, Y41D4A.6, pdhb-1, C24D10.6, spd-3, sucg-1, isp-1, ant-1.4, hars-1, nuaf-3, mrpl-51, Y62E10A.6, mrps-7, misc-1, K07E8.7, acdh-9, phb-2, F58F12.1, icd-1, pgam-5, pdha-1, C18E9.4, tomm-40, R53.4, atad-3, sdhd-1, mrpl-37, abtm-1, txl-1, crn-1, mrpl-19, mrpl-24, rad-8, mrpl-2…
GO.0030015..CCR4.NOT.core.complex	0.0113438	0.685526	ntl-2, ntl-9, ntl-3, ccf-1
GO.0043928..exonucleolytic.nuclear.transcribed.mRNA.catabolic.process.involved.in.deadenylation.dependent.decay	0.0113438	0.685526	exos-2, exos-8, exos-3, ccf-1
GO.0015935..small.ribosomal.subunit	0.0113334	0.685526	rps-2, rps-5, rps-23, rps-9, rps-20, rps-3
GO.0000340..RNA.7.methylguanosine.cap.binding	0.0113438	0.685526	ife-3, dcs-1, ife-2, ife-4
GO.0005732..small.nucleolar.ribonucleoprotein.complex	0.0113438	0.685526	lsm-6, snr-7, snr-5, Y48A6B.3
GO.0005682..U5.snRNP	0.0113334	0.685526	snr-4, F32B6.3, snr-1, snr-3, snr-7, snr-2
GO.0000243..commitment.complex	0.0113438	0.685526	F08B4.7, snr-1, snr-3, rnp-7
GO.0005687..U4.snRNP	0.0113438	0.685526	snr-1, snr-3, snr-7, snr-2
GO.0016272..prefoldin.complex	0.0113438	0.685526	pfd-4, pfd-2, pfd-6, pfd-5
GO.0010951..negative.regulation.of.endopeptidase.activity	0.0116966	0.698906	R12A1.3, K11D12.13, K11D12.6, cri-2, tag-196, F32D8.7, Y43F8B.3, mlt-11, E01G6.1, spon-1, K10D3.4, F30H5.3, ZC84.6, ZC84.1, W05B2.2
GO.0008201..heparin.binding	0.0122277	0.722519	sym-1, slt-1, dma-1, kal-1, nex-3
GO.0008080..N.acetyltransferase.activity	0.0137107	0.79254	T10B5.4, Y38A10A.7, Y97E10AL.3, elpc-3, anat-1, M7.12, R05H10.1, R05H10.7, C56G2.15
GO.0002064..epithelial.cell.development	0.0137107	0.79254	C16D9.1, T23F1.5, H42K12.3, ZC449.1, H03E18.1, noah-2, T26C5.2, noah-1, exc-4
GO.0048477..oogenesis	0.0138848	0.79397	F48G7.5, unc-62, emo-1, R186.8, csn-1, rab-6.2, csn-4, F38A1.8, pcn-1, tkr-3, csn-5, arp-11, npp-1, cyb-1, csn-6, noah-2, T02H6.11, phb-2, pdha-1, cpf-1, sqt-1, rpb-11, aps-3, riok-1, rab-8, csn-2, rps-17, dad-1, cdc-26, eif-3.E, hrp-2, T07D10.8, F22G12.3, nex-3, ifet-1, C35D10.13, Y54H5A.2, dlc-1, pgl-2, eif-3.D, cdk-1, rmd-1, ran-1, hpl-2, lis-1
GO.0000932..cytoplasmic.mRNA.processing.body	0.0150914	0.851923	gut-2, ain-1, lsm-3, ntl-2, lsm-4, lsm-6, rpb-7, ntl-9, disl-2, ntl-3, ccf-1
GO.0005681..spliceosomal.complex	0.0152186	0.851923	F32B6.3, lsm-4, hel-1, T13H5.4, F33H1.3, let-858, cacn-1, lsm-6, snr-7, snr-2, snr-5, C07A9.2
GO.0031966..mitochondrial.membrane	0.0185219	0.928496	asg-2, dct-1, sfxn-1.5, phb-2, tomm-40, R53.4, asg-1, Y82E9BR.3, ced-9
GO.0040032..post.embryonic.body.morphogenesis	0.0178993	0.928496	skr-10, dpy-10, dpy-2, eff-1, cpz-1, mboa-6
GO.0004867..serine.type.endopeptidase.inhibitor.activity	0.0187948	0.928496	R12A1.3, K11D12.13, K11D12.6, F32D8.7, Y43F8B.3, mlt-11, E01G6.1, spon-1, K10D3.4, F30H5.3, ZC84.6, ZC84.1, W05B2.2
GO.0030014..CCR4.NOT.complex	0.0199038	0.928496	ccr-4, ntl-9, ccf-1
GO.0005740..mitochondrial.envelope	0.0199038	0.928496	dct-1, sdhd-1, cco-1
GO.0006030..chitin.metabolic.process	0.0178993	0.928496	M03E7.4, cht-1, T10E10.4, E01G6.1, pqn-74, K04H4.2
GO.0014018..neuroblast.fate.specification	0.0199038	0.928496	pag-3, hlh-14, hlh-2
GO.0009253..peptidoglycan.catabolic.process	0.0199038	0.928496	lys-4, lys-5, lys-6
GO.0000389..mRNA.3.splice.site.recognition	0.0199038	0.928496	F53B7.3, prp-21, mog-2
GO.0080008..Cul4.RING.E3.ubiquitin.ligase.complex	0.0199038	0.928496	rbx-1, plrg-1, ZK430.7
GO.0008540..proteasome.regulatory.particle..base.subcomplex	0.0178993	0.928496	rpt-2, rpt-1, rpt-4, rpt-5, F56F11.4, rpt-3
GO.0035385..Roundabout.signaling.pathway	0.0199038	0.928496	sym-1, slt-1, dma-1
GO.0048495..Roundabout.binding	0.0199038	0.928496	sym-1, slt-1, dma-1
GO.0034719..SMN.Sm.protein.complex	0.0199038	0.928496	snr-1, snr-3, snr-7
GO.0006627..protein.processing.involved.in.protein.targeting.to.mitochondrion	0.0199038	0.928496	immp-2, mppa-1, immp-1
GO.0043047..single.stranded.telomeric.DNA.binding	0.0199038	0.928496	pot-2, pot-1, pot-3
GO.0035269..protein.O.linked.mannosylation	0.0199038	0.928496	H43I07.3, dpm-3, R12E2.13
GO.0000350..generation.of.catalytic.spliceosome.for.second.transesterification.step	0.0199038	0.928496	F53B7.3, F32B6.3, elpc-2
GO.0071014..post.mRNA.release.spliceosomal.complex	0.0199038	0.928496	M03F8.3, F53B7.3, K04G7.11
GO.0005576..extracellular.region	0.0212879	0.943108	R12A1.3, nlp-31, M03E7.4, cri-2, asp-6, T27E4.5, her-1, sqt-3, cut-2, nrf-5, wrt-8, grd-2, nas-38, lpr-7, lbp-3, lbp-1, cht-1, lgx-1, T10E10.4, unc-6, lpr-3, lpr-6, lpr-5, lpr-4, E01G6.1, slt-1, hch-1, cutl-28, sfrp-1, cht-3, clec-180, col-14, C06A6.5, unc-129, ins-8, ins-7, thn-1, pqn-74, C08F11.12, Y45F10C.2, cwn-1, ins-19, ins-12, ins-11, ins-2, ins-20, dpy-10, wrt-1, osm-8, eff-1, chil-18, ma…
GO.0001708..cell.fate.specification	0.0212306	0.943108	lag-2, pos-1, sel-12, eor-2, dsl-2, dsl-1, Y41D4B.26, Y41D4B.6, egl-38, dsl-6, par-5, cwn-1, hlh-2, lin-28, lin-53
GO.0000981..RNA.polymerase.II.transcription.factor.activity..sequence.specific.DNA.binding	0.0212306	0.943108	egl-46, ceh-27, cky-1, zip-5, fkh-2, hbl-1, fkh-3, fkh-4, pes-1, aptf-2, ast-1, aptf-4, hlh-2, F26F4.8, unc-86
GO.0007635..chemosensory.behavior	0.0208854	0.943108	odr-2, che-13, ben-1, odr-4, unc-119
GO.0000784..nuclear.chromosome..telomeric.region	0.0208854	0.943108	his-24, sir-2.1, pot-2, pot-1, pot-3
GO.0042464..dosage.compensation.by.hypoactivation.of.X.chromosome	0.0208854	0.943108	dpy-30, fox-1, sex-1, sdc-2, sea-1
GO.0005882..intermediate.filament	0.0214584	0.943108	ifc-1, ifd-2, ifa-4, ifp-1, ifa-3, ifb-2, lmn-1
GO.0001077..transcriptional.activator.activity..RNA.polymerase.II.core.promoter.proximal.region.sequence.specific.binding	0.0227327	0.97494	ceh-49, ceh-39, unc-3, ceh-48
GO.0005688..U6.snRNP	0.0227327	0.97494	gut-2, lsm-3, lsm-4, lsm-6
GO.0097526..spliceosomal.tri.snRNP.complex	0.0227327	0.97494	snr-1, snr-3, lsm-4, snr-7
GO.0005623..cell	0.249415	1	emo-1, cyn-3, aps-2, cdk-4, cdd-2, C06A6.5, pges-2, glrx-10, M04D5.1, dnj-27, glrx-21, glrx-5, Y49E10.4
GO.0005942..phosphatidylinositol.3.kinase.complex	1	1	NA
GO.0008286..insulin.receptor.signaling.pathway	0.830971	1	dao-5
GO.0008340..determination.of.adult.lifespan	0.0412193	1	sti-1, madd-2, hsp-16.2, unc-62, pgl-3, srr-4, pas-6, nstp-3, rpt-2, atp-4, unc-70, fat-7, pos-1, cln-3.3, rbx-1, atp-5, T19B10.2, rpt-1, hpo-31, pas-1, ril-1, ccnk-1, daf-21, ife-2, nas-38, mksr-1, lbp-3, unc-78, cst-1, calu-1, set-30, bus-8, asg-2, set-12, dct-1, lpr-5, sdc-2, C11H1.3, mboa-1, ain-1, pat-6, cutl-28, mksr-2, pdhb-1, bus-4, eif-1.A, glf-1, rps-8, tes-1, mrpl-1, isp-1, F08B4.7, al…
GO.0016301..kinase.activity	0.999999	1	kin-33, R02C2.1, kin-34, chk-2, R04A9.7, F28C10.3, ddr-2, cst-1, abl-1, cdk-4, pix-1, kin-5, thk-1, wee-1.1, E02H1.6, csk-1, src-1, riok-1, kin-3, riok-2, prk-2, C56G2.5, let-754, cdk-1
GO.0016310..phosphorylation	0.999999	1	kin-33, R02C2.1, kin-34, chk-2, R04A9.7, F28C10.3, ddr-2, cst-1, C55B6.1, abl-1, cdk-4, pix-1, kin-5, thk-1, R10H10.6, wee-1.1, E02H1.6, csk-1, src-1, riok-1, kin-3, riok-2, prk-2, C56G2.5, let-754, cdk-1
GO.0019901..protein.kinase.binding	0.997481	1	mig-2, cdk-1
GO.0035014..phosphatidylinositol.3.kinase.regulator.activity	1	1	NA
GO.0040024..dauer.larval.development	0.860943	1	daf-21, hid-1, unc-3, sir-2.1, ifta-2, dao-5, unc-119
GO.0043551..regulation.of.phosphatidylinositol.3.kinase.activity	1	1	NA
GO.0046854..phosphatidylinositol.phosphorylation	0.923324	1	tag-231
GO.0046935..1.phosphatidylinositol.3.kinase.regulator.activity	1	1	NA
GO.0003333..amino.acid.transmembrane.transport	0.987063	1	Y53F4B.12
GO.0005886..plasma.membrane	0.999997	1	lgc-54, ric-4, T07F10.1, wrt-8, gcy-22, rgs-9, K02E10.1, vang-1, ddr-2, tsp-17, inx-3, stn-2, ced-8, F47E1.4, lgc-47, inx-2, mig-2, R03G8.6, dpf-2, daf-6, rgs-11, efn-4, ced-10, icln-1, cav-1, best-13, inx-6, best-1, clhm-1, wrt-1, evl-20, lec-2, plx-2, csk-1, src-1, arl-13, yop-1, rab-8, F55F8.9, dma-1, mom-5, pat-4, orai-1, R07E5.7, wht-7, glr-1
GO.0015171..amino.acid.transmembrane.transporter.activity	0.984234	1	Y53F4B.12
GO.0015179..L.amino.acid.transmembrane.transporter.activity	0.906568	1	Y53F4B.12
GO.0015297..antiporter.activity	0.984234	1	Y53F4B.12
GO.0015807..L.amino.acid.transport	0.906568	1	Y53F4B.12
GO.0016020..membrane	1	1	B0348.2, W03F9.4, C05E4.15, Y50D4B.6, cnc-1, cnc-4, F52F10.2, F22F7.3, lag-2, cfz-2, slc-28.1, T22F3.11, ugt-32, C17E7.13, C17E7.12, H43I07.3, ugt-9, catp-2, srr-4, swt-7, Y58A7A.5, M03E7.2, memb-2, F44E7.9, nstp-3, fut-2, dmsr-12, lgc-54, srg-31, twk-11, odr-2, fat-7, str-31, T05B11.4, col-43, D1014.5, F38E1.9, cln-3.3, asp-2, lron-2, nstp-10, col-146, col-147, pitr-4, sdz-31, mam-5, C51E3.10, u…
GO.0016021..integral.component.of.membrane	1	1	B0348.2, W03F9.4, Y50D4B.6, cnc-1, cnc-4, F52F10.2, F22F7.3, lag-2, cfz-2, slc-28.1, T22F3.11, ugt-32, C17E7.13, C17E7.12, H43I07.3, ugt-9, catp-2, srr-4, swt-7, Y58A7A.5, M03E7.2, memb-2, F44E7.9, nstp-3, fut-2, dmsr-12, lgc-54, srg-31, twk-11, odr-2, fat-7, str-31, T05B11.4, col-43, D1014.5, F38E1.9, cln-3.3, asp-2, lron-2, nstp-10, col-146, col-147, pitr-4, sdz-31, C51E3.10, ugt-2, F15H10.8, F…
GO.1902475..L.alpha.amino.acid.transmembrane.transport	0.923324	1	Y53F4B.12
GO.1990184..amino.acid.transport.complex	1	1	NA
GO.0019915..lipid.storage	0.944822	1	lag-2, unc-62, K12B6.8, cpt-6, fat-7, ZC513.1, R11H6.5, T10C6.10, oac-53, ife-2, K02E10.4, igcm-3, unc-97, nhr-137, ref-2, T14B1.1, glo-3, F13E6.1, acbp-3, nhr-25, Y41D4A.6, F52C12.2, glf-1, rps-8, ric-3, col-117, col-3, cav-1, F25H8.1, F25H8.2, sir-2.1, col-125, F52B11.2, eef-1B.2, C50D2.1, Y57G7A.8, Y27F2A.6, C46E10.9, ntl-2, phb-2, ifg-1, atf-2, C01G6.9, rsp-7, mks-5, Y38E10A.3, F08G2.7, icd-2…
GO.0008406..gonad.development	0.0249937	1	cdc-25.2, lag-2, rbx-1, F53B7.3, snr-4, gut-2, daf-21, C43H6.4, hsp-3, sox-2, hnd-1, nhr-25, hpl-1, rab-6.2, rps-28, eif-1.A, csn-5, ruvb-2, rps-8, rsp-6, rpn-7, T11G6.8, gem-4, exos-4.1, prp-21, cct-3, eif-1, T27F7.4, rbbp-5, phb-2, icd-1, pdha-1, cct-1, ifg-1, mrpl-10, T13H5.4, tomm-40, gpd-4, rsp-2, cyd-1, cacn-1, kbp-3, icd-2, smo-1, src-1, rpb-7, riok-1, C44E4.4, chp-1, rpl-19, hlh-2, ncbp-2…
GO.0000278..mitotic.cell.cycle	0.447014	1	cdc-25.3
GO.0040025..vulval.development	0.272234	1	elpc-3, vab-8, hbl-1, grd-14, sdn-1, hpl-1, ain-1, grd-13, ubc-9, spd-3, egl-38, egl-26, eff-1, lin-56, smo-1, cpz-1, elpc-1, hlh-2, lin-28, pas-5, unc-101, hpl-2
GO.0040026..positive.regulation.of.vulval.development	0.89847	1	sdc-2, mig-2, nhr-25, lin-33, rsp-6, rsp-1, riok-1, hpl-2
GO.0098542..defense.response.to.other.organism	1	1	NA
GO.0003674..molecular_function	0.0811289	1	irg-1, odr-2, col-145, col-10, wrt-8, prde-1, F53B1.2, hid-1, ced-8, C05G5.5, clec-180, T26A8.2, pfd-4, thn-1, exos-4.1, tofu-6, wrt-1, lir-2, ltd-1, nphp-1, dph-2, mks-5, pes-10, T22C1.4, che-13, unc-101, ubl-1, wdr-5.1, dex-1, zip-8, sdz-15, ddo-3, rps-14, cids-1, cpar-1
GO.0006952..defense.response	0.804853	1	daf-21, abu-12, unc-78, pgp-5, ilys-3, glf-1, fmo-2, lys-5, lys-6, abu-11, skpo-1, F35C5.12, abu-13
GO.0031640..killing.of.cells.of.other.organism	0.546122	1	nlp-31
GO.0042742..defense.response.to.bacterium	0.365391	1	nlp-31, rab-14
GO.0050829..defense.response.to.Gram.negative.bacterium	0.579113	1	irg-1, swt-7, F35E12.2, F35E12.10, spp-3, M60.2, abl-1, pgp-5, F54B11.11, thn-1, dod-24, T19D12.4, rad-8
GO.0050830..defense.response.to.Gram.positive.bacterium	0.228234	1	clec-7, spp-3, pgp-5, ilys-2, lys-5, F43C11.7, atg-16.2, skpo-1
GO.0050832..defense.response.to.fungus	0.357992	1	cnc-1, cnc-4, nlp-31, abl-1, cnc-6
GO.0000077..DNA.damage.checkpoint	0.208396	1	abl-1, hus-1, mrt-2
GO.0000166..nucleotide.binding	0.994224	1	kin-33, R02C2.1, R02C2.6, kin-34, mrpl-39, catp-2, rpt-2, act-2, rpt-1, vab-8, myo-3, bmk-1, daf-21, wars-1, chk-2, gcy-22, R04A9.7, F28C10.3, fox-1, K02E10.1, ddr-2, cst-1, hsp-3, tbb-4, tba-8, abl-1, pgp-5, pgp-4, mig-2, cdk-4, madd-3, rab-14, rab-6.2, rps-24, cct-8, Y41D4A.6, T26C12.3, ced-10, ubc-9, T08B6.5, C02B10.4, sams-3, sams-5, ruvb-2, sucg-1, rsp-6, arf-3, klp-11, aly-1, aly-2, kin-5, …
GO.0004672..protein.kinase.activity	0.999985	1	kin-33, R02C2.1, R02C2.6, kin-34, Y50D4B.6, chk-2, gcy-22, R04A9.7, F28C10.3, ddr-2, cst-1, C36B7.1, abl-1, cdk-4, K04C1.5, E02H4.6, madd-3, kin-5, wee-1.1, csk-1, src-1, E02D9.1, kin-3, riok-2, pat-4, prk-2, C28A5.6, C56G2.5, cdk-1
GO.0004713..protein.tyrosine.kinase.activity	0.906057	1	Y50D4B.6, ddr-2, abl-1, kin-5, wee-1.1, csk-1, src-1
GO.0004715..non.membrane.spanning.protein.tyrosine.kinase.activity	0.738785	1	abl-1, kin-5, csk-1, src-1
GO.0005102..receptor.binding	0.57081	1	madd-2, grd-2, unc-6, abl-1, slt-1, unc-129, kin-5, cwn-1
GO.0005515..protein.binding	0.0413127	1	ife-3, sti-1, cmd-1, madd-2, knl-3, unc-62, pgl-3, ceh-34, pas-6, magu-2, pas-2, sipa-1, snr-4, rpt-1, vab-8, tomm-20, cky-1, swan-1, nrf-5, unc-39, nxf-2, pas-1, egl-1, bmk-1, daf-21, cyn-3, pqn-71, csn-1, slo-1, Y38H6C.14, nrde-3, ife-2, sel-12, mksr-1, snx-1, inso-1, F53B3.3, C02F12.8, dlg-1, unc-97, syd-9, sox-2, dct-1, vab-3, sdn-1, abl-1, mig-2, ceh-40, nhr-17, nhr-25, skr-20, ain-1, rab-6.…
GO.0005524..ATP.binding	1	1	kin-33, R02C2.1, R02C2.6, kin-34, catp-2, rpt-2, tofu-2, act-2, rpt-1, vab-8, myo-3, bmk-1, daf-21, wars-1, chk-2, R04A9.7, F28C10.3, asna-2, ddr-2, cst-1, hsp-3, C36B7.1, abl-1, pgp-5, pgp-4, cdk-4, K04C1.5, E02H4.6, madd-3, cct-8, rfc-2, Y41D4A.6, ubc-13, ubc-9, sams-3, sams-5, ruvb-2, sucg-1, klp-11, kin-5, sars-1, thk-1, hars-1, rpt-4, cct-3, cct-1, hel-1, wee-1.1, E02H1.6, atad-3, Y48B6A.13,…
GO.0005737..cytoplasm	0.232366	1	ife-3, sti-1, hsp-16.2, ifc-1, pas-6, rpt-2, crt-1, ubh-3, unc-70, Y57E12AL.6, pos-1, gsnl-1, rbx-1, tut-2, pas-2, act-2, rpt-1, gana-1, elpc-3, vab-8, myo-3, T07F10.1, pqn-68, eif-3.K, tbcb-1, swan-1, pas-1, daf-21, csn-1, wars-1, asp-1, dcs-1, nrde-3, ife-2, R04A9.7, F28C10.3, ifd-2, sec-22, pfn-3, ife-4, snx-1, rgs-9, fox-1, cht-1, unc-78, gyg-1, cst-1, ifa-4, inx-3, unc-6, C55B6.1, stn-2, ref…
GO.0006468..protein.phosphorylation	0.999994	1	kin-33, R02C2.1, R02C2.6, kin-34, Y50D4B.6, daf-21, chk-2, gcy-22, R04A9.7, F28C10.3, ddr-2, cst-1, C36B7.1, abl-1, cdk-4, K04C1.5, E02H4.6, madd-3, kin-5, wee-1.1, csk-1, src-1, riok-1, E02D9.1, kin-3, riok-2, pat-4, prk-2, C28A5.6, C56G2.5, cdk-1
GO.0007169..transmembrane.receptor.protein.tyrosine.kinase.signaling.pathway	0.950824	1	Y50D4B.6, abl-1, kin-5
GO.0007283..spermatogenesis	0.696229	1	elpc-3, abl-1, phb-2, rsp-2, rsp-1, elpc-1, mrpl-9
GO.0010212..response.to.ionizing.radiation	0.365391	1	abl-1, rfs-1
GO.0016740..transferase.activity	1	1	R02C2.1, ugt-32, ugt-9, cpt-4, cpt-6, fut-2, F40F9.10, ugt-2, mpst-1, elpc-3, ugt-15, hpo-31, T09F5.1, oac-53, chk-2, prmt-1, R04A9.7, F28C10.3, sms-2, F53B1.2, ddr-2, gyg-1, cst-1, hst-6, bus-8, uggt-1, set-12, oac-14, abl-1, dot-1.4, cdk-4, F48F7.3, bus-17, mboa-1, got-1.2, fnta-1, Y41D4A.6, ubc-13, oac-51, sams-3, ugt-24, sams-5, anat-1, kin-5, thk-1, bre-5, T27F7.4, B0228.7, wee-1.1, E02H1.6,…
GO.0030154..cell.differentiation	0.553526	1	lag-2, ceh-49, emo-1, vab-8, csn-1, ceh-39, abl-1, fkh-3, fkh-4, csn-4, pes-1, csn-5, ceh-48, rsp-6, kin-5, csn-6, wee-1.1, let-858, rsp-2, rsp-1, cyd-1, plx-2, csn-2, cnd-1, ceh-10, pgl-2, lis-1
GO.0030336..negative.regulation.of.cell.migration	0.149689	1	swan-1, abl-1
GO.0031234..extrinsic.component.of.cytoplasmic.side.of.plasma.membrane	0.960782	1	abl-1, kin-5
GO.0038083..peptidyl.tyrosine.autophosphorylation	0.851219	1	abl-1, kin-5, src-1
GO.0042127..regulation.of.cell.proliferation	0.250083	1	lag-2, F53B7.3, gut-2, sav-1, abl-1, dsl-2, dsl-1, spp-10, F32B6.3, kin-5, T11G6.8, dsl-6, aptf-2, prp-21, T13H5.4, aptf-4, cacn-1, rnp-6, ncbp-2, smr-1, dlc-1, K04G7.11, snu-23, rnf-113
GO.0043066..negative.regulation.of.apoptotic.process	0.123138	1	sel-12, abl-1, pag-3, icd-1, dad-1, eya-1, ced-9
GO.0043518..negative.regulation.of.DNA.damage.response..signal.transduction.by.p53.class.mediator	0.558208	1	rbx-1, abl-1
GO.0045087..innate.immune.response	0.895179	1	cnc-1, cnc-4, irg-1, F59B1.8, K09D9.1, swt-7, crn-2, zip-10, F35E12.2, F35E12.10, F13A7.11, spp-3, M60.2, F53A9.6, abl-1, mig-2, F54B11.11, F22H10.2, Y55F3AM.21, valv-1, spp-18, kin-5, his-48, thn-1, dod-24, F55G11.7, ins-11, T19D12.4, skpo-1, gst-24, F08G2.5, R12E2.13, rad-8, orai-1, T24C4.4, cnc-6, tsp-1
GO.1901075..negative.regulation.of.engulfment.of.apoptotic.cell	0.546122	1	abl-1
GO.0005215..transporter.activity	0.977111	1	F47B8.10, lbp-3, lbp-1, ced-8, F47E1.4, ant-1.4, ant-1.3, T11G6.2, aqp-2, aqp-12, ant-1.1
GO.0006810..transport	0.999999	1	slc-28.1, swt-7, memb-2, lgc-54, twk-11, F38E1.9, vha-18, nstp-10, emo-1, snf-11, tomm-20, nrf-5, F47B8.10, nxf-2, T01C3.2, slo-1, Y60A3A.9, sec-22, lbp-3, lbp-1, aps-2, inx-3, kqt-1, asg-2, F47E1.4, tmc-2, memb-1, lgc-47, pgp-5, acbp-3, inx-2, pgp-4, lgc-21, rab-6.2, inx-18, F38A1.8, syx-4, ant-1.4, ant-1.3, best-13, gtbp-1, glb-19, T11G6.2, inx-6, srf-3, best-1, mdt-9, misc-1, lgc-27, C30B5.2, …
GO.0006869..lipid.transport	0.995189	1	nrf-5
GO.0008152..metabolic.process	1	1	W03F9.4, ugt-32, ugt-9, catp-2, cpt-4, F44E7.2, Y38A10A.7, cpt-6, K07C11.7, F21C10.9, ZK287.1, ugt-2, F15H10.7, C45B11.6, bus-18, mpst-1, F10C2.3, gana-1, vab-8, myo-3, ugt-15, bmk-1, R11H6.5, C01G10.7, oac-53, asna-2, sul-1, cht-1, dhs-27, mans-3, bus-8, C41G11.1, C14F11.6, ilys-5, M60.2, F40B5.2, tbb-4, tba-8, T09B9.1, oac-14, pgp-5, pgp-4, rab-14, F09C8.1, F38A1.8, ilys-3, ilys-2, pdhb-1, unc-…
GO.0016246..RNA.interference	0.644114	1	nrde-3, pgp-4, Y71G10AL.1, sams-3, ruvb-2, npp-1, sams-2, prp-21, ppp-1, ZK1127.6, ZK1127.5, rsp-7, D2089.3, rpn-12, snr-7, mrpl-24, smg-5, ncbp-2, cfim-1, T08G11.4, wdr-5.1, C16A3.4, K12H4.5, rde-4
GO.0016887..ATPase.activity	0.972057	1	rpt-1, daf-21, asna-2, hsp-3, pgp-5, pgp-4, klp-11, E02H1.6, abtm-1, wht-7, abce-1
GO.0042626..ATPase.activity..coupled.to.transmembrane.movement.of.substances	0.987861	1	pgp-5, pgp-4, abtm-1, wht-7
GO.0043231..intracellular.membrane.bounded.organelle	0.895409	1	ugt-32, ugt-9, catp-2, ugt-2, ugt-15, egl-1, ugt-24, ric-3, fmo-1, fmo-2, pdha-1, ugt-31, ugt-26, odr-4
GO.0055085..transmembrane.transport	1	1	F52F10.2, T22F3.11, pitr-4, snf-11, F47B8.10, slo-1, M162.5, inx-3, kqt-1, pgp-5, inx-2, pgp-4, sfxn-1.5, C44C10.3, ant-1.4, ant-1.3, ncx-3, T11G6.2, inx-6, tomm-40, Y53F4B.12, abtm-1, F55F8.9, wht-7, R13A5.9, ant-1.1
GO.0040020..regulation.of.meiotic.nuclear.division	0.113879	1	lag-2, F53B7.3, gut-2, dsl-2, dsl-1, spp-10, F32B6.3, T11G6.8, dsl-6, prp-21, T13H5.4, cacn-1, rnp-6, ncbp-2, smr-1, dlc-1, K04G7.11, snu-23, rnf-113
GO.0030176..integral.component.of.endoplasmic.reticulum.membrane	0.965226	1	fce-2
GO.0030968..endoplasmic.reticulum.unfolded.protein.response	0.45831	1	crt-1, F41E6.11, F53B1.4, hsp-3, uggt-1, col-109, pqn-74, abu-11, phb-2, hsp-60
GO.0060465..pharynx.development	0.522981	1	lam-1, his-64, abu-14, tbx-37, pen-2, tbx-38
GO.0001507..acetylcholine.catabolic.process.in.synaptic.cleft	1	1	NA
GO.0003990..acetylcholinesterase.activity	1	1	NA
GO.0004104..cholinesterase.activity	1	1	NA
GO.0005615..extracellular.space	0.759513	1	cri-2, asp-6, tag-196, F15H10.7, F10C2.3, T02B5.3, wrt-8, ttr-42, T07H6.1, ttr-6, ttr-31, sym-1, slt-1, F38A5.22, unc-129, ttr-54, T07G12.3, ttr-17, ttr-50, cwn-1, mlt-10, C27D9.2, wrt-1, osm-8, ttr-18, T06A4.1, mab-20, cpz-1, dma-1, ddo-3, ttr-8, ttr-32, ttr-2
GO.0006581..acetylcholine.catabolic.process	1	1	NA
GO.0016787..hydrolase.activity	0.999531	1	cdc-25.2, Y46H3A.5, catp-2, pas-6, rpt-2, K08B12.1, ubh-3, ppt-1, F10D2.10, K07C11.7, asp-6, tag-196, asp-2, C08B6.8, pas-2, rpt-1, gana-1, pqn-68, T02B5.3, pas-1, wrt-8, asp-1, dcs-1, fce-2, nas-38, R04B3.2, sul-1, cht-1, mans-3, C41G11.1, F40B5.2, T09B9.1, H36L18.1, hch-1, C05G5.5, dpf-2, pbs-1, unc-33, csn-5, C17H12.3, ruvb-2, cht-3, C10C5.3, C10C5.5, lipl-7, sir-2.1, rpt-4, tre-5, try-1, pbs-…
GO.0030054..cell.junction	0.997511	1	lgc-54, unc-70, inso-1, unc-97, inx-3, lgc-47, inx-2, inx-18, inx-6, eva-1, Y71H2AM.15, glr-1
GO.0040012..regulation.of.locomotion	0.950824	1	unc-70, unc-78, clhm-1
GO.0042135..neurotransmitter.catabolic.process	1	1	NA
GO.0042802..identical.protein.binding	0.269928	1	pas-2, daf-21, unc-3, got-1.2, C06G3.6, rpt-4, F54D10.7, eff-1, pas-7, smo-1, cfim-1, baf-1, ZK1098.4
GO.0043083..synaptic.cleft	1	1	NA
GO.0045202..synapse	0.999996	1	lgc-54, ric-4, slo-1, lgc-47, glr-1
GO.0052689..carboxylic.ester.hydrolase.activity	0.957527	1	T02B5.3, T07H6.1, T09B9.1, B0464.9
GO.0007271..synaptic.transmission..cholinergic	0.999858	1	ric-4, ric-3
GO.0042803..protein.homodimerization.activity	0.134102	1	madd-2, asns-1, dct-1, dmd-9, hars-1, dmd-5, hlh-2, sod-2, rde-4, ced-9, frg-1
GO.0035188..hatching	0.91484	1	hch-1, EEED8.3, rpb-11, rpb-7, rpb-3, rpb-8
GO.0043058..regulation.of.backward.locomotion	0.434146	1	pag-3, glr-1
GO.0046983..protein.dimerization.activity	0.0512433	1	cky-1, hnd-1, K09A11.1, ngn-1, hlh-14, rpb-11, hlh-2, unc-120, rpb-3, hlh-16, cnd-1, rpac-19
GO.0050879..multicellular.organismal.movement	1	1	NA
GO.0006508..proteolysis	0.465642	1	pas-6, ubh-3, asp-6, tag-196, asp-2, pas-2, T07F10.1, pas-1, wrt-8, asp-1, fce-2, grd-2, nas-38, R04B3.2, acn-1, F48E3.4, H36L18.1, R03G8.6, hch-1, C05G5.5, dpf-2, cutl-28, immp-2, pbs-1, taf-2, csn-5, C01G5.6, otub-3, mppb-1, T13B5.9, ZK430.5, try-1, pbs-3, wrt-1, ubh-4, pas-7, rpn-12, ZK930.6, usp-14, T06A4.1, mppa-1, cpz-1, pbs-4, pas-3, pas-4, fce-1, pas-5, pbs-2, pbs-5, W05G11.4, zmp-1, pbs-…
GO.0008237..metallopeptidase.activity	0.903068	1	T07F10.1, nas-38, acn-1, H36L18.1, R03G8.6, hch-1, C05G5.5, taf-2, csn-5, C10C5.3, C10C5.5, fce-1, zmp-1, nas-1
GO.0008241..peptidyl.dipeptidase.activity	0.179186	1	acn-1
GO.0018991..oviposition	0.202984	1	unc-62, ppt-1, fat-7, bir-1, vab-8, unc-39, egl-1, grdn-1, ile-2, sel-12, fox-1, unc-78, acn-1, hbl-1, F22F4.1, syd-9, sox-2, dpy-7, ref-2, tni-1, nhr-25, ifa-3, ain-1, fnta-1, R08C7.4, ubc-9, valv-1, arp-11, egl-38, his-66, his-65, egl-26, fbxb-118, ast-1, C01F1.3, unc-85, hlh-14, dmd-5, rbbp-5, ZK1127.5, eff-1, pax-3, rnp-6, C44E4.4, csn-2, cyc-1, lin-28, skr-2, mom-5, sdha-2, eya-1, Y55D5A.1, …
GO.0040018..positive.regulation.of.multicellular.organism.growth	0.203223	1	fat-7, bus-18, grd-2, ifd-2, C44C1.1, wrt-2, acn-1, hst-6, syd-9, grd-14, ifp-1, nhr-25, F54B11.11, bus-17, rpl-15, Y69A2AR.32, grd-13, grd-10, R08C7.4, bus-4, eif-1.A, glf-1, sams-5, hars-1, ccr-4, dpm-3, exos-4.1, T02H6.11, fbxb-41, fbxb-13, fbxc-50, ntl-2, prdx-2, ins-11, C17G10.2, ifb-2, phb-2, ppp-1, wrt-1, wrt-10, skr-17, ifg-1, mrpl-10, D2085.3, C18E9.4, tomm-40, gpd-4, Y17G7B.20, cacn-1, …
GO.0003994..aconitate.hydratase.activity	1	1	NA
GO.0005829..cytosol	0.633431	1	asns-1, tut-2, egl-1, prmt-1, hid-1, tth-1, got-1.2, csn-4, ubxn-2, sams-3, sams-5, cdd-2, mvb-12, icln-1, dsh-1, ifg-1, rpn-12, tpi-1, Y48B6A.13, cars-1, ubl-5, phip-1, prmt-7, uev-1, sucl-2, gsr-1, B0285.4, cuc-1, let-754
GO.0006099..tricarboxylic.acid.cycle	0.472965	1	sucg-1, idh-1, sdhd-1, sdha-2, sucl-2
GO.0006879..cellular.iron.ion.homeostasis	0.749058	1	abtm-1
GO.0016829..lyase.activity	0.999999	1	gcy-22
GO.0046872..metal.ion.binding	1	1	W03F9.1, nhr-270, cmd-1, madd-2, Y73C8C.8, nhr-158, F32D1.5, catp-2, crt-1, K12B6.8, nhr-161, cri-2, pos-1, rbx-1, elpc-3, C01G10.7, nhr-50, nhr-218, nhr-127, chk-2, F53F8.3, B0310.2, nas-38, ZC13.1, sul-1, gyg-1, T22B2.1, T03G11.3, unc-97, hbl-1, nhr-120, nhr-137, F40B5.2, sex-1, phf-31, tni-1, H36L18.1, nhr-17, nhr-25, cdk-4, C11H1.3, hch-1, C05G5.5, unc-3, egrh-1, pag-3, nhr-274, K08D12.3, nhr…
GO.0051536..iron.sulfur.cluster.binding	0.99395	1	elpc-3, isp-1
GO.0051539..4.iron..4.sulfur.cluster.binding	1	1	NA
GO.0072350..tricarboxylic.acid.metabolic.process	1	1	NA
GO.0004889..acetylcholine.activated.cation.selective.channel.activity	1	1	NA
GO.0005216..ion.channel.activity	0.999873	1	slo-1, kqt-1, glr-1
GO.0005230..extracellular.ligand.gated.ion.channel.activity	0.998725	1	lgc-54, lgc-47, lgc-21, lgc-27
GO.0005231..excitatory.extracellular.ligand.gated.ion.channel.activity	1	1	NA
GO.0005622..intracellular	0.182129	1	madd-2, cdc-25.2, M03F8.3, K12B6.8, ubh-3, rpl-28, mrpl-49, rpl-38, sec-22, sav-1, K02E10.1, kqt-1, mig-2, C34E11.2, rab-14, rab-6.2, rps-24, rpl-15, rps-28, T26C12.3, ced-10, rps-8, arf-3, gtbp-1, rps-23, rab-19, mdt-9, rpl-29, F43C11.7, R12C12.5, T14B4.2, F10E7.5, ubh-4, evl-20, rpl-5, rpl-32, arc-1, M106.7, rps-9, tpi-1, mrpl-20, arl-3, arl-13, mrpl-17, Y47G6A.18, rab-8, rpl-13, mrpl-19, rpl-1…
GO.0005892..acetylcholine.gated.channel.complex	1	1	NA
GO.0006811..ion.transport	0.999991	1	lgc-54, twk-11, vha-18, slo-1, inx-3, kqt-1, asg-2, F47E1.4, tmc-2, lgc-47, inx-2, sfxn-1.5, lgc-21, inx-18, best-13, inx-6, best-1, lgc-27, F58F12.1, tomm-40, R53.4, asg-1, exc-4, Y82E9BR.3, glr-1, vha-1
GO.0007274..neuromuscular.synaptic.transmission	1	1	NA
GO.0015464..acetylcholine.receptor.activity	1	1	NA
GO.0035094..response.to.nicotine	1	1	NA
GO.0042166..acetylcholine.binding	1	1	NA
GO.0043005..neuron.projection	0.528138	1	madd-2, odr-2, ric-4, snf-11, hid-1, stn-2, mig-2, unc-33, ric-3, elpc-1, uev-1, glr-1
GO.0045211..postsynaptic.membrane	0.99395	1	dlg-1, glr-1
GO.0051932..synaptic.transmission..GABAergic	0.923324	1	lis-1
GO.0098655..cation.transmembrane.transport	0.999961	1	catp-2, Y57A10A.28
GO.0098662..inorganic.cation.transmembrane.transport	1	1	NA
GO.0098703..calcium.ion.import.across.plasma.membrane	1	1	NA
GO.0034220..ion.transmembrane.transport	0.998567	1	lgc-54, lgc-47, sfxn-1.5, lgc-21, lgc-27, aqp-2, aqp-12, glr-1
GO.0007268..chemical.synaptic.transmission	0.976585	1	dlg-1
GO.0042995..cell.projection	0.695266	1	ddr-2, ifta-2, mks-5, daf-25, src-1, arl-13, che-13, kin-3, uev-1, C54C6.6, dex-1, odr-4
GO.0000281..mitotic.cytokinesis	0.611157	1	act-2, evl-20, csc-1, emr-1
GO.0000910..cytokinesis	0.444344	1	act-2, csn-1, csn-4, csn-5, syx-4, csn-6, ostd-1, csn-2, pfn-1
GO.0005200..structural.constituent.of.cytoskeleton	0.066883	1	unc-70, tbb-4, tba-8, tba-6, tba-1, tba-2, ben-1
GO.0005856..cytoskeleton	0.477187	1	gsnl-1, act-2, vab-8, tbcb-1, pfn-3, unc-78, tbb-4, tba-8, pat-6, ifta-2, evl-20, csc-1, smo-1, tba-6, tba-1, che-13, pfn-1, tba-2, sbds-1, C54C6.6, ben-1, arx-6, dlc-1, gpr-1, cdk-1, rmd-1, lis-1
GO.0007517..muscle.organ.development	0.809423	1	unc-97, frg-1
GO.0030036..actin.cytoskeleton.organization	1	1	NA
GO.0030866..cortical.actin.cytoskeleton.organization	0.830971	1	act-2
GO.0040007..growth	0.475602	1	F32D1.5, lron-2, act-2, vab-8, gut-2, ifd-2, aps-2, ifp-1, R08C7.4, sams-3, arf-3, cav-1, T11G6.8, ntl-2, ifb-2, atg-16.2, ppp-1, skr-17, ifg-1, epg-2, mrpl-23, iftb-1, wdr-5.1, rpb-8, lgg-3, K12H4.5, mrps-9, T28D6.6, ntl-3
GO.0040039..inductive.cell.migration	0.0804107	1	act-2, bir-1, vab-3, sdn-1, dgn-1, mig-2, nhr-25, pix-1, cct-8, ced-10, arf-3, unc-129, nol-1, ZK430.7, icd-1, cct-1, T13H5.4, cyd-1, cacn-1, icd-2, src-1, Y73E7A.8, txl-1, rab-8, hlh-2, pfd-6, tba-1, tba-2, rpb-8, snr-5, apc-2
GO.0071688..striated.muscle.myosin.thick.filament.assembly	0.655447	1	nstp-10, act-2, mpst-1, prmt-1, inso-1, pat-6, C33D9.13, Y105C5A.1268, sdz-4, K05F1.5, atg-16.2, vps-32.1, tpi-1, Y54E10BR.4, rab-8, C43E11.9, chp-1, mbd-2, lmn-1, W04A8.4, pat-4, lgg-3, cuc-1
GO.0005884..actin.filament	0.749058	1	act-2
GO.0005938..cell.cortex	0.926824	1	act-2, sel-12, pfn-3, cav-1, par-5, ham-1, gla-3, pfn-1, gpr-1, lis-1
GO.0007111..meiosis.II.cytokinesis	0.179186	1	act-2
GO.0005865..striated.muscle.thin.filament	0.861278	1	vab-8
GO.0045121..membrane.raft	0.43229	1	F35E12.2, F35E12.10, daf-21, F54B11.11, cav-1, lec-5, vps-32.1, T19D12.4, lec-2, vha-1
GO.0030033..microvillus.assembly	0.326275	1	daf-25
GO.0035148..tube.formation	1	1	NA
GO.0097516..microvillar.actin.bundle	1	1	NA
GO.1990357..terminal.web	0.447014	1	ifb-2
GO.0004016..adenylate.cyclase.activity	0.992853	1	gcy-22
GO.0006171..cAMP.biosynthetic.process	1	1	NA
GO.0006935..chemotaxis	0.866964	1	gcy-22, ceh-36, mks-5, odr-4
GO.0007188..adenylate.cyclase.modulating.G.protein.coupled.receptor.signaling.pathway	1	1	NA
GO.0007189..adenylate.cyclase.activating.G.protein.coupled.receptor.signaling.pathway	1	1	NA
GO.0007193..adenylate.cyclase.inhibiting.G.protein.coupled.receptor.signaling.pathway	1	1	NA
GO.0007614..short.term.memory	0.749058	1	glr-1
GO.0008219..cell.death	0.616544	1	asp-6, asp-2, asp-1, lin-33, icd-1, ced-9
GO.0009190..cyclic.nucleotide.biosynthetic.process	0.992853	1	gcy-22
GO.0016849..phosphorus.oxygen.lyase.activity	0.992853	1	gcy-22
GO.0019933..cAMP.mediated.signaling	1	1	NA
GO.0030431..sleep	1	1	NA
GO.0035556..intracellular.signal.transduction	0.999961	1	K12B6.8, gcy-22, R04A9.7, F28C10.3, kqt-1, dsh-1, C56G2.5
GO.0040013..negative.regulation.of.locomotion	0.935985	1	denn-4, ttr-32
GO.0040017..positive.regulation.of.locomotion	0.991445	1	dgn-1, lam-1
GO.0072375..medium.term.memory	1	1	NA
GO.0004383..guanylate.cyclase.activity	0.987063	1	gcy-22
GO.0006182..cGMP.biosynthetic.process	0.987063	1	gcy-22
GO.0007165..signal.transduction	0.999991	1	arrd-19, srg-31, T04F3.2, gcy-22, K02E10.1, ptr-4, F13E6.5, mig-2, daf-6, rab-14, rab-6.2, T26C12.3, ced-10, rab-19, cbn-1, arrd-1, ptr-18, F18A11.3, plx-2, rab-8, ptr-10, H10E21.4, ptr-9, F43D9.1, ran-1
GO.0008294..calcium..and.calmodulin.responsive.adenylate.cyclase.activity	1	1	NA
GO.0090038..negative.regulation.of.protein.kinase.C.signaling	0.749058	1	let-754
GO.2000114..regulation.of.establishment.of.cell.polarity	0.749058	1	let-754
GO.0007186..G.protein.coupled.receptor.signaling.pathway	0.999744	1	cfz-2, str-31, frpr-9, fmi-1, ZK813.5, str-124, sprr-1, str-173, tkr-3, sfrp-1, dmsr-4, str-148, mom-5, B0244.15
GO.1900195..positive.regulation.of.oocyte.maturation	1	1	NA
GO.0003779..actin.binding	0.654534	1	unc-70, gsnl-1, myo-3, pfn-3, unc-78, tni-1, pat-6, pfn-1, arx-6, frg-1, myo-6
GO.0007613..memory	1	1	NA
GO.0007616..long.term.memory	1	1	NA
GO.0014069..postsynaptic.density	0.434146	1	dlg-1, glr-1
GO.0051015..actin.filament.binding	0.924563	1	gsnl-1, unc-78, frg-1
GO.0051016..barbed.end.actin.filament.capping	0.627474	1	gsnl-1
GO.0097120..receptor.localization.to.synapse	0.694249	1	dlg-1
GO.2000249..regulation.of.actin.cytoskeleton.reorganization	1	1	NA
GO.0004222..metalloendopeptidase.activity	0.899237	1	fce-2, nas-38, H36L18.1, hch-1, mppb-1, T13B5.9, mppa-1, fce-1, ucr-2.3, zmp-1, nas-1
GO.0007229..integrin.mediated.signaling.pathway	0.434146	1	calm-1, pat-4
GO.0008233..peptidase.activity	0.151053	1	pas-6, ubh-3, asp-6, tag-196, asp-2, pas-2, pas-1, wrt-8, asp-1, fce-2, grd-2, nas-38, R04B3.2, H36L18.1, hch-1, C05G5.5, dpf-2, immp-2, pbs-1, csn-5, otub-3, ZK430.5, try-1, pbs-3, wrt-1, ubh-4, pas-7, usp-14, pbs-4, pas-3, pas-4, fce-1, pas-5, pbs-2, pbs-5, zmp-1, pbs-6, immp-1, nas-1
GO.0022401..negative.adaptation.of.signaling.pathway	1	1	NA
GO.0046959..habituation	0.794046	1	glr-1
GO.0004000..adenosine.deaminase.activity	1	1	NA
GO.0006382..adenosine.to.inosine.editing	1	1	NA
GO.0006396..RNA.processing	0.16638	1	M03F8.3, hpo-31, snr-1, prp-21, snr-3, ZK1127.5, lsm-4, F33H1.3, C44E4.4, F02A9.4
GO.0022626..cytosolic.ribosome	1	1	NA
GO.0003824..catalytic.activity	0.999933	1	F32D1.5, F15H10.7, C45B11.6, F10C2.3, gana-1, elpc-3, C01G10.7, dcs-1, sul-1, lgx-1, F48E3.8, got-1.2, pdhb-1, H35B03.2, cdd-2, sucg-1, mppb-1, T07G12.3, ech-2, F52B11.2, tre-5, Y25C1A.13, ZK1127.5, B0228.7, chhy-1, M106.7, tpi-1, mppa-1, crn-1, B0205.6, F42G9.1, ucr-2.3, sucl-2, H14E04.2, B0464.9, Y47D3A.14
GO.0005777..peroxisome	0.99782	1	acdh-2
GO.0006629..lipid.metabolic.process	0.999993	1	Y46H3A.5, K08B12.1, fat-7, sms-2, F53B1.2, spp-10, lipl-7, elo-9, M05B5.4, lagr-1, mboa-6, C39B5.14
GO.0008609..alkylglycerone.phosphate.synthase.activity	1	1	NA
GO.0008610..lipid.biosynthetic.process	1	1	NA
GO.0008611..ether.lipid.biosynthetic.process	1	1	NA
GO.0016491..oxidoreductase.activity	1	1	F32D1.5, fat-7, R07B7.4, B0250.5, dhs-27, pdhb-1, glf-1, H04M03.3, F55G1.9, isp-1, idh-1, dhs-31, dhs-12, fmo-1, fmo-2, M04B2.4, Y62E10A.6, acdh-9, prdx-2, acdh-2, pdha-1, skpo-1, cyp-13A5, gpd-4, gbh-1, Y39G8B.1, Y39G8B.2, jmjc-1, rad-8, nuo-2, sod-2, dhs-4, sdha-2, gsr-1, amx-1, nduf-2.2, ddo-3, agmo-1
GO.0016614..oxidoreductase.activity..acting.on.CH.OH.group.of.donors	1	1	NA
GO.0050660..flavin.adenine.dinucleotide.binding	0.873633	1	R07B7.4, fmo-1, fmo-2, acdh-9, acdh-2, sdha-2, gsr-1
GO.0055114..oxidation.reduction.process	0.999999	1	F32D1.5, fat-7, R07B7.4, B0250.5, dhs-27, pdhb-1, glf-1, H04M03.3, F55G1.9, isp-1, idh-1, dhs-31, dhs-12, fmo-1, fmo-2, M04B2.4, Y62E10A.6, cyp-31A5, acdh-9, skpo-2, M03A1.8, prdx-2, acdh-2, msra-1, pdha-1, skpo-1, cyp-13A5, gpd-4, gbh-1, sdhd-1, T06D8.10, C31C9.2, Y39G8B.1, Y39G8B.2, glrx-10, txl-1, jmjc-1, rad-8, nuo-2, nuo-6, D2030.4, sod-2, dhs-4, sdha-2, dnj-27, gsr-1, amx-1, glrx-21, nduf-2…
GO.0071949..FAD.binding	0.434146	1	R07B7.4, ddo-3
GO.0008270..zinc.ion.binding	0.999606	1	W03F9.1, nhr-270, madd-2, Y73C8C.8, nhr-158, nhr-161, ZK287.1, rbx-1, T07F10.1, end-1, end-3, rpoa-12, nhr-50, nhr-218, nhr-127, F53F8.3, nas-38, ZC13.1, T22B2.1, unc-97, nhr-120, nhr-137, sex-1, phf-31, H36L18.1, nhr-17, nhr-25, R03G8.6, C11H1.3, hch-1, nhr-274, K08D12.3, nhr-236, T26C12.3, taf-2, Y4C6A.3, C06G3.6, valv-1, tes-1, cdd-2, F08B4.7, alp-1, mdt-9, tag-273, athp-3, F43C11.7, mnat-1, Y…
GO.0008361..regulation.of.cell.size	1	1	NA
GO.0030199..collagen.fibril.organization	1	1	NA
GO.0043652..engulfment.of.apoptotic.cell	0.762227	1	ptr-4, ced-8, mig-2, ced-10, glf-1, vps-4, rpb-7, nuo-6, mom-5, C28A5.6, arx-6, dlc-1, lis-1
GO.0004871..signal.transducer.activity	1	1	F18A11.3, dao-5
GO.0014057..positive.regulation.of.acetylcholine.secretion..neurotransmission	1	1	NA
GO.0016079..synaptic.vesicle.exocytosis	1	1	NA
GO.0030163..protein.catabolic.process	0.0487272	1	unc-62, rpt-2, egl-46, asp-6, asp-2, unc-42, rpt-1, sqt-3, egl-1, asp-1, unc-78, unc-97, mup-2, unc-6, eat-20, ifa-3, pat-6, egl-38, rpt-4, egl-26, unc-85, dpy-10, dpy-2, sqt-1, rpt-5, unc-120, pat-4, F56F11.4, rpt-3, ZK637.14, ced-9, unc-119
GO.0030421..defecation	0.971729	1	crt-1, hid-1, egl-38, phb-2
GO.0035418..protein.localization.to.synapse	1	1	NA
GO.0060179..male.mating.behavior	1	1	NA
GO.0004930..G.protein.coupled.receptor.activity	0.999392	1	cfz-2, frpr-9, fmi-1, ZK813.5, sprr-1, tkr-3, sfrp-1, dmsr-4, mom-5, B0244.15
GO.0007218..neuropeptide.signaling.pathway	0.997972	1	nlp-34, nlp-31, nlp-24, tkr-3
GO.0008188..neuropeptide.receptor.activity	1	1	NA
GO.2000294..positive.regulation.of.defecation	1	1	NA
GO.0005085..guanyl.nucleotide.exchange.factor.activity	0.869613	1	mdt-9, Y47H9C.7, ZK1098.4
GO.0007618..mating	1	1	NA
GO.0017112..Rab.guanyl.nucleotide.exchange.factor.activity	1	1	NA
GO.0043547..positive.regulation.of.GTPase.activity	0.991992	1	sipa-1, rgs-9, tag-52, pix-1, rgs-11, mdt-9, Y47H9C.7, ZK1098.4, ced-9
GO.0004252..serine.type.endopeptidase.activity	0.545851	1	F48E3.4, immp-2, try-1, ZK930.6, immp-1
GO.0003924..GTPase.activity	0.45648	1	K02E10.1, tbb-4, tba-8, mig-2, rab-14, rab-6.2, F38A1.8, ced-10, rab-19, evl-20, rab-8, tba-6, tba-1, tba-2, M01E5.2, ben-1, C26E6.12, gop-2, ZK1236.1, ran-1
GO.0005525..GTP.binding	0.46626	1	F46B6.4, gcy-22, K02E10.1, tbb-4, tba-8, mig-2, rab-14, rab-6.2, F38A1.8, T26C12.3, ced-10, sucg-1, arf-3, rab-19, ifta-2, evl-20, E02H1.2, arc-1, arl-3, arl-13, rab-8, tba-6, tba-1, tba-2, M01E5.2, ben-1, C26E6.12, gop-2, arf-1.2, ZK1236.1, ran-1, T28D6.6
GO.0006886..intracellular.protein.transport	0.652703	1	clic-1, emo-1, tomm-20, hid-1, K02E10.1, rab-14, rab-6.2, F38A1.8, Y38F2AR.9, ced-10, syx-4, rab-19, tomm-22, rab-8, unc-101, arf-1.2, ran-1
GO.0006913..nucleocytoplasmic.transport	0.472654	1	K02E10.1, rab-14, rab-6.2, ced-10, rab-19, rab-8, ran-1
GO.0007264..small.GTPase.mediated.signal.transduction	0.317154	1	K02E10.1, mig-2, rab-14, rab-6.2, T26C12.3, ced-10, arf-3, rab-19, mdt-9, evl-20, arc-1, arl-3, arl-13, rab-8, arf-1.2, ran-1
GO.0008021..synaptic.vesicle	0.984234	1	rab-8
GO.0015031..protein.transport	0.69008	1	emo-1, tomm-20, T01C3.2, K02E10.1, aps-2, memb-1, mig-2, rab-14, rab-6.2, T26C12.3, ced-10, arf-3, rab-19, mdt-9, C30B5.2, evl-20, tomm-40, arc-1, arl-3, icd-2, aps-3, scm-1, rab-8, cup-2, unc-101, ddp-1, arf-1.2, C28H8.4, ran-1, unc-119, F45G2.8
GO.0030141..secretory.granule	1	1	NA
GO.0032402..melanosome.transport	1	1	NA
GO.0042470..melanosome	1	1	NA
GO.0045921..positive.regulation.of.exocytosis	1	1	NA
GO.0090522..vesicle.tethering.involved.in.exocytosis	1	1	NA
GO.1903364..positive.regulation.of.cellular.protein.catabolic.process	1	1	NA
GO.1990504..dense.core.granule.exocytosis	1	1	NA
GO.0002250..adaptive.immune.response	1	1	NA
GO.0006954..inflammatory.response	1	1	NA
GO.0006979..response.to.oxidative.stress	0.694828	1	skpo-2, phb-2, msra-1, skpo-1, T06D8.10, jmjc-1, rad-8, cuc-1
GO.0007568..aging	1	1	NA
GO.0007611..learning.or.memory	1	1	NA
GO.0014065..phosphatidylinositol.3.kinase.signaling	1	1	NA
GO.0016303..1.phosphatidylinositol.3.kinase.activity	1	1	NA
GO.0016773..phosphotransferase.activity..alcohol.group.as.acceptor	0.984234	1	C55B6.1
GO.0030168..platelet.activation	1	1	NA
GO.0031513..nonmotile.primary.cilium	0.799513	1	asg-2, clhm-1, nphp-1, daf-25, arl-13, kin-3, asb-1
GO.0035005..1.phosphatidylinositol.4.phosphate.3.kinase.activity	1	1	NA
GO.0036092..phosphatidylinositol.3.phosphate.biosynthetic.process	1	1	NA
GO.0043053..dauer.entry	0.533917	1	vab-3, daf-6, par-5, tomm-40, sod-2, mec-8, che-13
GO.0046686..response.to.cadmium.ion	1	1	NA
GO.0048015..phosphatidylinositol.mediated.signaling	1	1	NA
GO.0050919..negative.chemotaxis	0.830971	1	mab-20
GO.0050920..regulation.of.chemotaxis	0.861278	1	daf-25
GO.0060326..cell.chemotaxis	1	1	NA
GO.1901047..insulin.receptor.signaling.pathway.involved.in.determination.of.adult.lifespan	1	1	NA
GO.0001965..G.protein.alpha.subunit.binding	1	1	NA
GO.0005096..GTPase.activator.activity	0.975377	1	sipa-1, rgs-9, rgs-11, ced-9
GO.0030695..GTPase.regulator.activity	0.749058	1	gpr-1
GO.0050790..regulation.of.catalytic.activity	0.835999	1	ubxn-2, gpr-1
GO.0060259..regulation.of.feeding.behavior	1	1	NA
GO.0003684..damaged.DNA.binding	0.738785	1	pot-2, rps-3, mrt-2, pot-3
GO.0003908..methylated.DNA..protein..cysteine.S.methyltransferase.activity	1	1	NA
GO.0006281..DNA.repair	0.969679	1	chk-2, ruvb-2, mnat-1, crn-1, hus-1, his-68, rps-3, rfs-1, mrt-2
GO.0006307..DNA.dealkylation.involved.in.DNA.repair	1	1	NA
GO.0016765..transferase.activity..transferring.alkyl.or.aryl..other.than.methyl..groups	1	1	NA
GO.0032259..methylation	0.570626	1	R08E5.3, prmt-1, set-12, dot-1.4, F49C12.10, F25H8.1, coq-3, nol-1, B0491.7, prmt-7, B0205.8, B0285.4, B0361.6, anmt-1, M142.8
GO.0001085..RNA.polymerase.II.transcription.factor.binding	0.396671	1	egl-46, end-1, end-3, ubc-9, wdr-5.1
GO.0003677..DNA.binding	0.204908	1	nhr-270, nhr-158, unc-62, ceh-34, ceh-49, nhr-161, his-7, unc-42, ceh-22, ceh-27, ceh-32, unc-39, rpoa-12, nhr-50, his-3, nhr-218, nhr-127, bed-1, B0310.2, ceh-39, fkh-2, mls-2, hbl-1, nhr-120, nhr-137, hil-3, sex-1, vab-3, ceh-40, nhr-17, nhr-25, K09A11.1, fkh-3, fkh-4, ceh-36, his-24, unc-3, rfc-2, nhr-274, nhr-236, zip-11, zag-1, pcn-1, pes-1, hil-2, hil-7, ceh-48, his-61, his-62, his-60, his-…
GO.0003700..transcription.factor.activity..sequence.specific.DNA.binding	0.934435	1	nhr-270, nhr-158, atf-8, nhr-161, ceh-32, zip-5, end-1, end-3, nhr-50, nhr-218, nhr-127, fkh-2, hbl-1, nhr-120, nhr-137, sex-1, vab-3, ceh-40, nhr-17, nhr-25, fkh-3, fkh-4, T27A8.2, nhr-274, nhr-236, dmd-9, zip-11, pes-1, egl-38, tbx-36, aptf-2, sea-1, ast-1, dmd-5, aptf-4, atf-2, nhr-2, ztf-11, nhr-113, ces-2, tbx-43, ceh-43, F26F4.8, cnd-1, ceh-10, tbx-11, zip-8, unc-86, tbx-9, tbx-37, tbx-33, …
GO.0005667..transcription.factor.complex	0.789437	1	end-1, end-3, hel-1, tbx-9
GO.0006351..transcription..DNA.templated	0.949758	1	nhr-270, nhr-158, ceh-49, nhr-161, elpc-3, cky-1, rpoa-12, T01C3.2, prde-1, nhr-50, nhr-218, nhr-127, ceh-39, fkh-2, hbl-1, nhr-120, nhr-137, sex-1, vab-3, nhr-17, nhr-25, fkh-3, fkh-4, unc-3, nhr-274, nhr-236, taf-2, zag-1, pes-1, ceh-48, ruvb-2, egl-38, tbx-36, rpoa-49, sea-1, unc-85, rbbp-5, icd-1, T24H10.1, pax-3, M106.7, rpb-11, rpb-7, jmjc-1, W09C3.4, elpc-1, nhr-2, unc-120, rpb-3, lin-53, …
GO.0006355..regulation.of.transcription..DNA.templated	0.881685	1	nhr-270, nhr-158, unc-62, atf-8, ceh-49, nhr-161, ceh-32, elpc-3, cky-1, zip-5, end-1, end-3, T01C3.2, prde-1, nhr-50, nhr-218, nhr-127, E01B7.2, prmt-1, ceh-39, fkh-2, nhr-120, nhr-137, sex-1, vab-3, C34E11.2, nhr-17, nhr-25, fkh-3, fkh-4, unc-3, T27A8.2, nhr-274, nhr-236, ngn-1, dmd-9, zip-11, taf-2, zag-1, pes-1, ceh-48, ruvb-2, egl-38, tbx-36, aptf-2, sea-1, ast-1, ntl-2, unc-85, dmd-5, rbbp-…
GO.0006366..transcription.from.RNA.polymerase.II.promoter	0.275801	1	ceh-49, end-1, end-3, ceh-39, unc-3, ceh-48, ham-1, rpb-11, hlh-2, rpb-3, rpb-8
GO.0007275..multicellular.organism.development	0.268849	1	sti-1, lag-2, cfz-2, unc-62, ceh-34, fat-7, rbx-1, her-1, ceh-22, emo-1, ceh-32, vab-8, nrf-5, wrt-8, csn-1, grd-2, vang-1, ZK813.3, ZK813.1, hbl-1, vab-3, ceh-40, nhr-25, ceh-36, slt-1, hch-1, unc-3, efn-4, csn-4, dsl-2, dsl-1, ced-10, zag-1, ubc-9, csn-5, sfrp-1, rsp-6, egl-38, dsl-6, csn-6, cwn-1, tofu-6, wrt-1, eff-1, evl-20, wee-1.1, pax-3, rsp-2, rsp-1, cacn-1, plx-2, smo-1, mab-20, R12E2.1…
GO.0009410..response.to.xenobiotic.stimulus	1	1	NA
GO.0022008..neurogenesis	0.627474	1	lis-1
GO.0030522..intracellular.receptor.signaling.pathway	0.861278	1	nhr-25
GO.0035176..social.behavior	1	1	NA
GO.0043565..sequence.specific.DNA.binding	0.915896	1	nhr-270, nhr-158, ceh-34, atf-8, nhr-161, ceh-22, cky-1, zip-5, end-1, end-3, nhr-50, nhr-218, nhr-127, fkh-2, nhr-120, nhr-137, sex-1, nhr-17, nhr-25, fkh-3, fkh-4, T27A8.2, nhr-274, nhr-236, dmd-9, zip-11, taf-2, pes-1, nsy-7, egl-38, mbf-1, ast-1, hlh-14, dmd-5, aptf-4, atf-2, nhr-2, hlh-2, ces-1, nhr-113, ces-2, zip-8, unc-86
GO.0045944..positive.regulation.of.transcription.from.RNA.polymerase.II.promoter	0.253656	1	ceh-49, unc-42, ceh-22, cky-1, end-1, end-3, ccnk-1, F28C10.3, ceh-39, fkh-2, mls-2, vab-3, nhr-25, ceh-36, unc-3, taf-2, ceh-48, egl-38, his-64, ham-1, sea-1, ast-1, aptf-4, hlh-2, his-67, cic-1, unc-86
GO.0090575..RNA.polymerase.II.transcription.factor.complex	0.363445	1	cky-1, nhr-25, hlh-2, unc-86
GO.0004874..aryl.hydrocarbon.receptor.activity	1	1	NA
GO.0007399..nervous.system.development	0.371123	1	vab-8, sel-12, fox-1, ddr-2, dlg-1, tth-1, ced-10, cwn-1, prk-2, cnd-1, dex-1, ceh-10, unc-86, lis-1
GO.0007416..synapse.assembly	0.886152	1	tba-1
GO.0007610..behavior	0.159127	1	nphp-1, kin-3, unc-86
GO.0034753..nuclear.aryl.hydrocarbon.receptor.complex	1	1	NA
GO.0046685..response.to.arsenic.containing.substance	1	1	NA
GO.0071218..cellular.response.to.misfolded.protein	1	1	NA
GO.0000235..astral.microtubule	1	1	NA
GO.0000780..condensed.nuclear.chromosome..centromeric.region	1	1	NA
GO.0000794..condensed.nuclear.chromosome	0.985684	1	ceh-39, csc-1
GO.0005813..centrosome	0.775739	1	cmd-1, mdf-2, ZK430.5, evl-20, tac-1, che-13, F43D9.1, lis-1
GO.0005828..kinetochore.microtubule	1	1	NA
GO.0007020..microtubule.nucleation	1	1	NA
GO.0007049..cell.cycle	0.44702	1	cdc-25.2, rbx-1, daf-21, chk-2, cdk-4, cyb-1, mnat-1, tofu-6, evl-20, wee-1.1, cyd-1, csc-1, kbp-3, emr-1, K07A1.10, him-10, apc-2, gpr-1, cdc-25.3, cdk-1, rmd-1, ran-1, lis-1
GO.0031616..spindle.pole.centrosome	1	1	NA
GO.0032133..chromosome.passenger.complex	1	1	NA
GO.0032465..regulation.of.cytokinesis	0.220716	1	tba-1, tba-2
GO.0035174..histone.serine.kinase.activity	1	1	NA
GO.0035404..histone.serine.phosphorylation	1	1	NA
GO.0040002..collagen.and.cuticulin.based.cuticle.development	0.0334606	1	sqt-3, dpy-3, dpy-7, Y66H1A.4, Y41D4A.6, dpy-13, glf-1, col-14, ant-1.3, ccr-4, prp-21, dpy-10, dpy-2, F33H1.3, dph-2, col-39, sqt-1, tac-1, smo-1, lsm-6, mom-5, dpy-17, gei-13, cdk-1, elpc-2
GO.0051233..spindle.midzone	0.420027	1	bir-1, bmk-1, mdf-2
GO.0090307..mitotic.spindle.assembly	0.0749515	1	bir-1, vab-8, bmk-1
GO.1904781..positive.regulation.of.protein.localization.to.centrosome	1	1	NA
GO.0000793..condensed.chromosome	0.421473	1	bir-1, dsb-1, csc-1, dsb-2, cpar-1, baf-1
GO.0004674..protein.serine.threonine.kinase.activity	0.999948	1	R02C2.1, prde-1, chk-2, R04A9.7, F28C10.3, cst-1, cdk-4, K04C1.5, wee-1.1, riok-1, E02D9.1, kin-3, riok-2, pat-4, prk-2, C28A5.6, C56G2.5, cdk-1
GO.0005694..chromosome	0.223302	1	prde-1, hil-3, his-24, hil-2, his-66, his-63, C16C8.16, csc-1, kbp-3, smo-1, his-67, his-68, him-10, cec-1, cpar-1, ran-1, lis-1
GO.0005819..spindle	0.386772	1	bmk-1, csc-1, tac-1, smo-1, sbds-1, gpr-1
GO.0005876..spindle.microtubule	0.558208	1	bir-1, rmd-1
GO.0007059..chromosome.segregation	0.352047	1	vab-8, bmk-1, emr-1, hus-1, baf-1, rmd-1
GO.0007067..mitotic.nuclear.division	0.149074	1	cdc-25.2, C33G8.2, rbx-1, chk-2, tbb-4, cdk-4, C33D9.13, cyb-1, csc-1, bub-3, kbp-3, cpn-1, lmn-1, tba-2, him-10, apc-2, gpr-1, cdc-25.3, cdk-1, rmd-1, ran-1, lis-1
GO.0007126..meiotic.nuclear.division	0.939885	1	hpo-9, bir-1, chk-2, snx-1, cdk-4, cav-1, par-5, F33H1.3, tac-1, hus-1, F26B1.2, skr-2, dao-5, cdk-1
GO.0016568..chromatin.modification	0.577499	1	T01C3.2, dot-1.4, ruvb-2, unc-85, rbbp-5, jmjc-1, lin-53, wdr-5.1, cec-7
GO.0018105..peptidyl.serine.phosphorylation	0.998872	1	prde-1, cdk-4, K04C1.5, C28A5.6, C56G2.5
GO.0018107..peptidyl.threonine.phosphorylation	0.937076	1	cdk-4
GO.0019894..kinesin.binding	1	1	NA
GO.0030261..chromosome.condensation	1	1	NA
GO.0030496..midbody	1	1	NA
GO.0031991..regulation.of.actomyosin.contractile.ring.contraction	1	1	NA
GO.0045184..establishment.of.protein.localization	1	1	NA
GO.0046777..protein.autophosphorylation	0.835999	1	src-1, prk-2
GO.0051117..ATPase.binding	0.861278	1	rfs-1
GO.0051256..mitotic.spindle.midzone.assembly	1	1	NA
GO.0051301..cell.division	0.387087	1	cdc-25.2, rbx-1, chk-2, cdk-4, cyb-1, tofu-6, evl-20, wee-1.1, cyd-1, csc-1, kbp-3, tac-1, cdc-26, him-10, apc-2, gpr-1, cdc-25.3, pri-1, cdk-1, rmd-1, ran-1, lis-1
GO.0051321..meiotic.cell.cycle	0.975377	1	rbx-1, riok-1, him-10, rfs-1
GO.0005913..cell.cell.adherens.junction	0.923324	1	pix-1
GO.0008092..cytoskeletal.protein.binding	1	1	NA
GO.0016327..apicolateral.plasma.membrane	1	1	NA
GO.0040027..negative.regulation.of.vulval.development	0.769409	1	snr-4, dpy-30, gut-2, sdc-2, hpl-1, C11H1.3, ubc-9, sams-3, gtbp-1, pfd-4, sams-2, snr-1, rbbp-5, snr-3, lsm-4, cpf-1, die-1, rpn-12, rsr-2, rpb-11, smo-1, snr-7, C44E4.4, chp-1, noah-1, lin-53, pas-5, snr-2, wdr-5.1, asb-1, snr-5, hpl-2, Y49E10.4
GO.0043296..apical.junction.complex	0.220716	1	dlg-1, exc-4
GO.0044292..dendrite.terminus	0.627474	1	mksr-2
GO.0045216..cell.cell.junction.organization	0.326275	1	unc-97
GO.0032266..phosphatidylinositol.3.phosphate.binding	1	1	NA
GO.0002376..immune.system.process	0.794046	1	skpo-1
GO.0005516..calmodulin.binding	0.999012	1	npp-1
GO.0042771..intrinsic.apoptotic.signaling.pathway.in.response.to.DNA.damage.by.p53.class.mediator	1	1	NA
GO.0043025..neuronal.cell.body	0.996337	1	madd-2, odr-2, snf-11, sel-12, efn-4, ced-10, ric-3, elpc-1, tba-1, kin-3, glr-1
GO.0003676..nucleic.acid.binding	0.172043	1	C04F5.9, egl-46, C08B6.8, rpoa-12, nrde-3, B0310.2, fox-1, hbl-1, syd-9, ref-2, K09A11.1, egrh-1, pag-3, ZK662.5, pat-9, K08D12.3, Y69A2AR.32, zag-1, T08B6.5, C02B10.4, M03D4.4, rsp-6, F08B4.7, gtbp-1, T11G6.8, Y62E10A.2, C50D2.5, alg-2, C46E10.9, sdz-12, EEED8.12, EEED8.4, tofu-6, fust-1, hel-1, eif-3.G, T22C8.3, T24H10.1, rsp-7, M106.7, rsp-2, rsp-1, rpb-7, rnp-6, C44E4.4, cey-3, cey-2, F26B1.2…
GO.0003725..double.stranded.RNA.binding	0.260396	1	alg-2, Y48C3A.18, rde-4
GO.0003727..single.stranded.RNA.binding	0.363445	1	pos-1, alg-2, rpb-7, rde-4
GO.0016892..endoribonuclease.activity..producing.3.phosphomonoesters	0.326275	1	alg-2
GO.0035068..micro.ribonucleoprotein.complex	0.326275	1	alg-2
GO.0035196..production.of.miRNAs.involved.in.gene.silencing.by.miRNA	0.326275	1	alg-2
GO.0035198..miRNA.binding	0.326275	1	alg-2
GO.0035279..mRNA.cleavage.involved.in.gene.silencing.by.miRNA	0.326275	1	alg-2
GO.0070551..endoribonuclease.activity..cleaving.siRNA.paired.mRNA	0.447014	1	alg-2
GO.0070922..small.RNA.loading.onto.RISC	0.326275	1	alg-2
GO.0090502..RNA.phosphodiester.bond.hydrolysis..endonucleolytic	0.317579	1	K10C9.3, H35B03.2, Y62E10A.2, alg-2, Y54E10BR.4, F02A9.4
GO.0004029..aldehyde.dehydrogenase..NAD..activity	1	1	NA
GO.0016620..oxidoreductase.activity..acting.on.the.aldehyde.or.oxo.group.of.donors..NAD.or.NADP.as.acceptor	0.965226	1	gpd-4
GO.0048871..multicellular.organismal.homeostasis	1	1	NA
GO.0006730..one.carbon.metabolic.process	0.558208	1	sams-3, sams-5
GO.0009058..biosynthetic.process	0.979897	1	got-1.2, ppp-1
GO.0009258..10.formyltetrahydrofolate.catabolic.process	1	1	NA
GO.0016155..formyltetrahydrofolate.dehydrogenase.activity	1	1	NA
GO.0016742..hydroxymethyl...formyl..and.related.transferase.activity	1	1	NA
GO.0019145..aminobutyraldehyde.dehydrogenase.activity	1	1	NA
GO.0047105..4.trimethylammoniobutyraldehyde.dehydrogenase.activity	1	1	NA
GO.0004028..3.chloroallyl.aldehyde.dehydrogenase.activity	1	1	NA
GO.0004030..aldehyde.dehydrogenase..NAD.P....activity	1	1	NA
GO.0006081..cellular.aldehyde.metabolic.process	1	1	NA
GO.0003842..1.pyrroline.5.carboxylate.dehydrogenase.activity	1	1	NA
GO.0006537..glutamate.biosynthetic.process	1	1	NA
GO.0006561..proline.biosynthetic.process	0.546122	1	F55G1.9
GO.0032502..developmental.process	0.352047	1	unc-62, emc-6, rps-2, rpl-5, rps-9, rpb-3
GO.0004777..succinate.semialdehyde.dehydrogenase..NAD...activity	1	1	NA
GO.0009013..succinate.semialdehyde.dehydrogenase..NAD.P....activity	1	1	NA
GO.0000062..fatty.acyl.CoA.binding	0.924563	1	acbp-3, acdh-9, acdh-2
GO.0004491..methylmalonate.semialdehyde.dehydrogenase..acylating..activity	1	1	NA
GO.0006573..valine.metabolic.process	1	1	NA
GO.0018478..malonate.semialdehyde.dehydrogenase..acetylating..activity	1	1	NA
GO.0019859..thymine.metabolic.process	1	1	NA
GO.0005575..cellular_component	0.402263	1	irg-1, col-145, col-10, cst-1, C05G5.5, clec-180, pfd-4, lys-5, bre-5, exos-4.1, lir-2, arc-1, dph-2, ubl-1, zip-8, sdz-15, ddo-3, rps-14, cids-1, gei-13
GO.0001055..RNA.polymerase.II.activity	0.208396	1	rpb-11, rpb-3, rpb-8
GO.0003899..DNA.directed.RNA.polymerase.activity	0.0312594	1	rpoa-12, rpoa-49, M106.7, rpb-11, rpb-7, W09C3.4, rpb-3, rpb-8, pri-1, rpac-19
GO.0005665..DNA.directed.RNA.polymerase.II..core.complex	0.232444	1	rpb-11, rpb-7, rpb-3, rpb-8
GO.0006479..protein.methylation	0.520178	1	prmt-1, prmt-7, wdr-5.1
GO.0007052..mitotic.spindle.organization	0.804409	1	bir-1, tac-1, epg-2, tba-1, mom-5, tba-2, him-10, kbp-1, gpr-1
GO.0008356..asymmetric.cell.division	0.645082	1	arf-3, cyd-1, ces-1, mom-5, ces-2
GO.0010458..exit.from.mitosis	1	1	NA
GO.0016779..nucleotidyltransferase.activity	0.646432	1	tut-2, hpo-31, ppp-1, T15H9.6, F43G6.5, Y48C3A.18, pri-1
GO.0042789..mRNA.transcription.from.RNA.polymerase.II.promoter	1	1	NA
GO.0005887..integral.component.of.plasma.membrane	0.982638	1	Y50D4B.6, lag-2, slc-28.1, catp-2, twk-11, str-31, pitr-4, snf-11, sel-12, tsp-17, F47E1.4, tsp-21, F13E6.5, pgp-5, pgp-4, C44C10.3, str-124, dsl-2, dsl-1, Y41D4B.26, Y41D4B.6, str-173, syx-4, cav-1, best-13, dsl-6, best-1, str-148, clhm-1, eff-1, plx-2, exc-4, B0244.15, tsp-2, tsp-1
GO.0006995..cellular.response.to.nitrogen.starvation	1	1	NA
GO.0008519..ammonium.transmembrane.transporter.activity	1	1	NA
GO.0015695..organic.cation.transport	0.886152	1	C44C10.3
GO.0015696..ammonium.transport	1	1	NA
GO.0019740..nitrogen.utilization	1	1	NA
GO.0072488..ammonium.transmembrane.transport	1	1	NA
GO.0034648..histone.demethylase.activity..H3.dimethyl.K4.specific.	0.447014	1	amx-1
GO.0034720..histone.H3.K4.demethylation	0.220716	1	jmjc-1, amx-1
GO.0005635..nuclear.envelope	0.698784	1	ubc-9, npp-1, emr-1, ncbp-2, lmn-1, baf-1
GO.0005640..nuclear.outer.membrane	1	1	NA
GO.0007010..cytoskeleton.organization	1	1	NA
GO.0035046..pronuclear.migration	0.157254	1	rbx-1, par-5, pfd-2, atad-3, tac-1, dnc-5, tba-1, tba-2, ben-1, dlc-1, pfd-5, let-754, lis-1
GO.0051087..chaperone.binding	0.319103	1	C01G10.8, pfd-4, K07E8.6, pfd-6
GO.0051179..localization	1	1	NA
GO.0002143..tRNA.wobble.position.uridine.thiolation	1	1	NA
GO.0004792..thiosulfate.sulfurtransferase.activity	0.546122	1	mpst-1
GO.0008641..small.protein.activating.enzyme.activity	1	1	NA
GO.0016874..ligase.activity	0.264535	1	skr-14, skr-7, skr-20, skr-21, Y41D4A.6, ubc-13, ubc-9, skr-16, sucg-1, sars-1, hars-1, skr-10, skr-13, skr-9, skr-8, skr-12, skr-15, skr-17, arc-1, E01A2.5, skr-2, sucl-2, F02A9.4, Y66D12A.7
GO.0016925..protein.sumoylation	0.293598	1	ubc-9, smo-1
GO.0018117..protein.adenylylation	1	1	NA
GO.0019948..SUMO.activating.enzyme.activity	1	1	NA
GO.0031510..SUMO.activating.enzyme.complex	1	1	NA
GO.0032447..protein.urmylation	0.627474	1	tut-2
GO.0042292..URM1.activating.enzyme.activity	1	1	NA
GO.0070733..protein.adenylyltransferase.activity	1	1	NA
GO.0005680..anaphase.promoting.complex	0.293598	1	mat-3, apc-2
GO.0031625..ubiquitin.protein.ligase.binding	0.409528	1	rpt-2, ubc-13, ubc-9, npl-4.1, uev-1, apc-2, ubc-7
GO.0042787..protein.ubiquitination.involved.in.ubiquitin.dependent.protein.catabolic.process	0.978579	1	rbx-1, C16A11.5, Y52E8A.2, apc-2
GO.0061630..ubiquitin.protein.ligase.activity	0.734742	1	rbx-1, ubc-13, ubc-9, C16A11.5, Y52E8A.2, uev-1, apc-2, T02C1.1, ubc-7
GO.0004842..ubiquitin.protein.transferase.activity	0.990358	1	madd-2, bir-1, C11H1.3, ubc-13, rnf-113
GO.0008054..negative.regulation.of.cyclin.dependent.protein.serine.threonine.kinase.by.cyclin.degradation	1	1	NA
GO.0045132..meiotic.chromosome.segregation	0.720184	1	hpo-9, chk-2, ife-2, cec-5, skr-13, skr-12, F33H1.3, csc-1, tac-1, icd-2, nhr-2, F26B1.2, zhp-3, skr-2, dao-5, him-10, unc-86, rfs-1, gpr-1, mrt-2
GO.0045842..positive.regulation.of.mitotic.metaphase.anaphase.transition	1	1	NA
GO.0097602..cullin.family.protein.binding	0.627474	1	rbx-1
GO.0002039..p53.binding	1	1	NA
GO.0007219..Notch.signaling.pathway	0.744549	1	sel-12, pen-2
GO.0016485..protein.processing	0.984234	1	ucr-2.3
GO.0034394..protein.localization.to.cell.surface	0.447014	1	ric-3
GO.0043085..positive.regulation.of.catalytic.activity	0.0327327	1	spp-13, spp-10, mlt-8, K02A11.4, Y71H2AM.20
GO.0045165..cell.fate.commitment	0.208396	1	egl-46, vab-3, pen-2
GO.0048598..embryonic.morphogenesis	0.255007	1	elpc-3, inx-3, mup-2, elpc-1, mom-5, kal-1, eya-1, pen-2
GO.0048599..oocyte.development	0.611157	1	elpc-3, elpc-1, arf-1.2, hpl-2
GO.0060581..cell.fate.commitment.involved.in.pattern.specification	1	1	NA
GO.0070765..gamma.secretase.complex	0.149689	1	sel-12, pen-2
GO.0005768..endosome	0.811646	1	rab-19, C30B5.2, cup-2, glr-1
GO.0005769..early.endosome	0.8306	1	snx-1, rab-14, cup-2
GO.0031410..cytoplasmic.vesicle	0.968263	1	C11H1.3, daf-6, ced-10, unc-101, odr-4
GO.0042395..ecdysis..collagen.and.cuticulin.based.cuticle	0.434146	1	cpz-1, gsr-1
GO.0046914..transition.metal.ion.binding	1	1	NA
GO.0009306..protein.secretion	0.108986	1	rpt-2, tomm-20, tomm-22, tomm-40, rab-8, unc-101
GO.0016192..vesicle.mediated.transport	0.949449	1	clic-1, sec-22, syx-4, arl-3, unc-101, arf-1.2, C28H8.4, trpp-3
GO.0030131..clathrin.adaptor.complex	0.749058	1	unc-101
GO.0045176..apical.protein.localization	0.558208	1	sel-12, unc-101
GO.0003906..DNA..apurinic.or.apyrimidinic.site..lyase.activity	1	1	NA
GO.0006284..base.excision.repair	1	1	NA
GO.0006974..cellular.response.to.DNA.damage.stimulus	0.995403	1	ccnk-1, chk-2, dcs-1, ruvb-2, gtbp-1, skr-15, hel-1, crn-1, F26B1.2, rfs-1, mrt-2
GO.0008081..phosphoric.diester.hydrolase.activity	1	1	NA
GO.0008311..double.stranded.DNA.3.5.exodeoxyribonuclease.activity	1	1	NA
GO.0017005..3.tyrosyl.DNA.phosphodiesterase.activity	1	1	NA
GO.0090305..nucleic.acid.phosphodiester.bond.hydrolysis	0.597435	1	C08B6.8, pot-2, W04A8.4, disl-2, ZK1098.3, mrt-2, ccf-1, pot-3
GO.0004177..aminopeptidase.activity	0.937076	1	dpf-2
GO.0001714..endodermal.cell.fate.specification	0.275215	1	end-1, end-3, src-1, mom-5
GO.0005881..cytoplasmic.microtubule	1	1	NA
GO.0005912..adherens.junction	0.650602	1	dlg-1, unc-97, pat-4
GO.0007026..negative.regulation.of.microtubule.depolymerization	0.447014	1	tac-1
GO.0007389..pattern.specification.process	1	1	NA
GO.0007492..endoderm.development	1	1	NA
GO.0008013..beta.catenin.binding	0.794046	1	ZK1248.19
GO.0008283..cell.proliferation	0.627474	1	skr-10
GO.0016055..Wnt.signaling.pathway	0.307241	1	cfz-2, K04C1.5, eor-2, sfrp-1, cwn-1, dsh-1, mom-5, kin-3, C28A5.6
GO.0016476..regulation.of.embryonic.cell.shape	1	1	NA
GO.0016477..cell.migration	0.0796014	1	cmd-1, unc-62, rbx-1, F53B7.3, snr-4, vab-8, gut-2, unc-39, sdn-1, mig-2, rab-6.2, ced-10, lam-1, prp-21, eif-1, T27F7.4, rbbp-5, pdha-1, T13H5.4, tomm-40, cacn-1, rpl-19, hlh-2, ncbp-2, cdc-26, wdr-5.1, rps-13, K04G7.11, rpl-21
GO.0030177..positive.regulation.of.Wnt.signaling.pathway	1	1	NA
GO.0030178..negative.regulation.of.Wnt.signaling.pathway	1	1	NA
GO.0030334..regulation.of.cell.migration	0.825299	1	vab-8, unc-39, unc-6, ced-10, cacn-1, plx-2, mab-20, ceh-10
GO.0030877..beta.catenin.destruction.complex	1	1	NA
GO.0035414..negative.regulation.of.catenin.import.into.nucleus	1	1	NA
GO.0045295..gamma.catenin.binding	1	1	NA
GO.0045595..regulation.of.cell.differentiation	0.365391	1	hpl-1, hpl-2
GO.0045732..positive.regulation.of.protein.catabolic.process	1	1	NA
GO.0047485..protein.N.terminus.binding	1	1	NA
GO.0048666..neuron.development	0.15977	1	unc-70, zig-4, unc-3, hlh-2, mec-8, unc-86
GO.0051782..negative.regulation.of.cell.division	0.794046	1	cyd-1
GO.0090090..negative.regulation.of.canonical.Wnt.signaling.pathway	1	1	NA
GO.0008565..protein.transporter.activity	0.960782	1	aps-2, aps-3
GO.0030276..clathrin.binding	0.957625	1	aps-2
GO.0005794..Golgi.apparatus	0.706114	1	memb-2, nstp-10, T09F5.1, sel-12, sul-1, memb-1, F48F7.3, bus-17, rab-6.2, cav-1, bre-5, srf-3, rab-19, arl-3, che-13, unc-101, arf-1.2, odr-4, trpp-3, pen-2
GO.0030117..membrane.coat	1	1	NA
GO.0030121..AP.1.adaptor.complex	0.627474	1	unc-101
GO.0030119..AP.type.membrane.coat.adaptor.complex	1	1	NA
GO.0008022..protein.C.terminus.binding	0.886152	1	csn-5
GO.0008104..protein.localization	0.141221	1	mksr-1, mksr-2, ifta-2, nphp-1, lmn-1, che-13, tba-2, odr-4, iff-1
GO.0030139..endocytic.vesicle	1	1	NA
GO.0032794..GTPase.activating.protein.binding	1	1	NA
GO.0036062..presynaptic.periactive.zone	1	1	NA
GO.0045334..clathrin.coated.endocytic.vesicle	1	1	NA
GO.0007040..lysosome.organization	0.906568	1	cln-3.3
GO.0030123..AP.3.adaptor.complex	1	1	NA
GO.0008595..anterior.posterior.axis.specification..embryo	0.627474	1	rbx-1
GO.0009880..embryonic.pattern.specification	0.906568	1	pos-1
GO.0016331..morphogenesis.of.embryonic.epithelium	0.191507	1	efn-4, die-1, mab-20, arx-6
GO.0040028..regulation.of.vulval.development	0.896758	1	lag-2, cwn-1
GO.0046331..lateral.inhibition	1	1	NA
GO.0006833..water.transport	0.434146	1	aqp-2, aqp-12
GO.0015204..urea.transmembrane.transporter.activity	0.293598	1	aqp-2, aqp-12
GO.0015250..water.channel.activity	0.434146	1	aqp-2, aqp-12
GO.0015254..glycerol.channel.activity	0.434146	1	aqp-2, aqp-12
GO.0015793..glycerol.transport	0.434146	1	aqp-2, aqp-12
GO.0016323..basolateral.plasma.membrane	0.781952	1	vang-1, dlg-1, orai-1
GO.0022838..substrate.specific.channel.activity	1	1	NA
GO.0071918..urea.transmembrane.transport	0.293598	1	aqp-2, aqp-12
GO.0016324..apical.plasma.membrane	0.938918	1	sel-12, vang-1, egl-26, rab-8, exc-4, orai-1
GO.0008150..biological_process	0.45831	1	col-145, C05G5.5, clec-180, lir-2, arc-1, dph-2, pes-10, ubl-1, zip-8, ddo-3
GO.0016567..protein.ubiquitination	0.975482	1	madd-2, rbx-1, bir-1, C11H1.3, ubc-13, arc-1, BE0003N10.3, ubc-7, rnf-113
GO.0005783..endoplasmic.reticulum	0.196505	1	W03F9.1, crt-1, emo-1, bus-18, R04F11.5, prmt-1, fce-2, trap-2, sel-12, sul-1, calu-1, mans-3, hsp-3, uggt-1, F48E3.8, mboa-1, emc-6, ric-3, fmo-1, fmo-2, dpm-3, pfd-2, ostd-1, dad-1, F02E9.1, fce-1, cup-2, set-18, dnj-27, lagr-1, W04A8.4, mboa-6, arf-1.2, C28H8.4, odr-4, glr-1, trpp-3, pen-2, agmo-1
GO.0007005..mitochondrion.organization	0.108986	1	ppt-1, atad-3, hsp-60, ddp-1, arf-1.2, ant-1.1
GO.0007276..gamete.generation	0.995568	1	rbx-1, ZK430.7, ZK1127.5, mrpl-14, iff-2, hlh-2, arf-1.2, iff-1, cec-7
GO.0048259..regulation.of.receptor.mediated.endocytosis	0.326275	1	arf-1.2
GO.1904748..regulation.of.apoptotic.process.involved.in.development	0.179186	1	arf-1.2
GO.0032940..secretion.by.cell	0.749028	1	lgc-54, asns-1, snr-4, bed-1, sams-5, arf-3, his-31, snr-1, misc-1, sec-20, snr-5
GO.0012505..endomembrane.system	0.948362	1	ced-9
GO.0042059..negative.regulation.of.epidermal.growth.factor.receptor.signaling.pathway	1	1	NA
GO.0000226..microtubule.cytoskeleton.organization	0.749058	1	spd-3
GO.0005764..lysosome	0.915152	1	ppt-1, tag-196, cln-3.3, R04B3.2, spp-10, cpz-1, exc-4
GO.0008088..axo.dendritic.transport	1	1	NA
GO.0008333..endosome.to.lysosome.transport	1	1	NA
GO.0048786..presynaptic.active.zone	1	1	NA
GO.0005930..axoneme	0.558208	1	ifta-2, che-13
GO.0030425..dendrite	0.62321	1	tsp-17, mksr-2, tba-1, kin-3, uev-1, dex-1, odr-4, glr-1
GO.0046907..intracellular.transport	1	1	NA
GO.0032501..multicellular.organismal.process	1	1	NA
GO.0040010..positive.regulation.of.growth.rate	0.319441	1	hpl-1, hlh-14, rad-8, mboa-6, hpl-2
GO.0050896..response.to.stimulus	0.498646	1	odr-4, unc-86
GO.0000049..tRNA.binding	0.56658	1	tut-2, Y48C3A.18, fars-1
GO.0004812..aminoacyl.tRNA.ligase.activity	0.555263	1	wars-1, sars-1, hars-1, cars-1, fars-1, pars-1
GO.0004813..alanine.tRNA.ligase.activity	1	1	NA
GO.0006400..tRNA.modification	1	1	NA
GO.0006419..alanyl.tRNA.aminoacylation	1	1	NA
GO.0016597..amino.acid.binding	1	1	NA
GO.0016876..ligase.activity..forming.aminoacyl.tRNA.and.related.compounds	1	1	NA
GO.0043039..tRNA.aminoacylation	0.794046	1	fars-1
GO.0005789..endoplasmic.reticulum.membrane	0.14833	1	H43I07.3, fat-7, emo-1, fce-2, trap-2, sel-12, K02E10.1, mboa-1, ric-3, fmo-1, fmo-2, fkb-1, dpm-3, T27F7.4, ostd-1, dad-1, fce-1, cup-2, fkb-2, mboa-6, R07E5.7, C28H8.4, odr-4, pen-2
GO.0006631..fatty.acid.metabolic.process	0.996418	1	fat-7, elo-9
GO.0006633..fatty.acid.biosynthetic.process	0.8503	1	fat-7, elo-9, Y56A3A.19, agmo-1
GO.0016627..oxidoreductase.activity..acting.on.the.CH.CH.group.of.donors	0.924563	1	acdh-9, acdh-2, sdha-2
GO.0005885..Arp2.3.protein.complex	0.749058	1	arx-6
GO.0007015..actin.filament.organization	0.687993	1	tth-1, mig-2, die-1
GO.0010631..epithelial.cell.migration	0.749058	1	arx-6
GO.0031252..cell.leading.edge	0.293598	1	madd-2, plx-2
GO.0034314..Arp2.3.complex.mediated.actin.nucleation	0.794046	1	arx-6
GO.0009790..embryo.development	0.386772	1	evl-20, wee-1.1, lin-53, arx-6, sdz-15, ccf-1
GO.0015629..actin.cytoskeleton	0.191507	1	gsnl-1, pfn-3, pfn-1, arx-6
GO.0030833..regulation.of.actin.filament.polymerization	1	1	NA
GO.0000176..nuclear.exosome..RNase.complex.	0.118105	1	exos-2, exos-4.1, exos-8, exos-3
GO.0000177..cytoplasmic.exosome..RNase.complex.	0.0390959	1	exos-2, exos-4.1, exos-8, exos-3
GO.0004527..exonuclease.activity	0.0790335	1	C08B6.8, exos-2, exos-8, crn-1, exos-3, disl-2, ZK1098.3, ccf-1
GO.0005730..nucleolus	0.525537	1	rpoa-12, Y66H1A.4, exos-4.1, ZK430.7, ZK1127.5, Y73E7A.2, lsm-6, crn-1, hus-1, dao-5, eif-6, Y40B1B.7, sbds-1, C34E10.10, rps-13, Y48A6B.3, frg-1
GO.0016075..rRNA.catabolic.process	0.220716	1	exos-4.1, disl-2
GO.0031125..rRNA.3.end.processing	0.447014	1	exos-4.1
GO.0034427..nuclear.transcribed.mRNA.catabolic.process..exonucleolytic..3.5	0.0390959	1	exos-2, exos-4.1, exos-8, exos-3
GO.0034475..U4.snRNA.3.end.processing	0.0390959	1	exos-2, exos-4.1, exos-8, exos-3
GO.0071028..nuclear.mRNA.surveillance	0.293598	1	exos-4.1, exos-8
GO.0071051..polyadenylation.dependent.snoRNA.3.end.processing	0.0431476	1	exos-2, exos-4.1, exos-3
GO.0055120..striated.muscle.dense.body	0.0731052	1	W03F9.1, madd-2, gsnl-1, slo-1, pfn-3, inso-1, gyg-1, unc-97, pat-6, alp-1, pfd-2, spon-1, ltd-1, W03C9.2, F25H2.4, set-18, eva-1, pat-4, Y71H2AM.15, har-1, anmt-1, frg-1
GO.0030041..actin.filament.polymerization	0.179186	1	arx-6
GO.0015078..hydrogen.ion.transmembrane.transporter.activity	0.066883	1	atp-4, atp-5, asg-2, asg-1, Y82E9BR.3, asb-1, vha-1
GO.0015986..ATP.synthesis.coupled.proton.transport	0.0524159	1	atp-4, atp-5, asg-2, F58F12.1, asg-1, Y82E9BR.3, asb-1
GO.0034606..response.to.hermaphrodite.contact	0.319441	1	asg-2, klp-11, nphp-1, kin-3, asb-1
GO.0046933..proton.transporting.ATP.synthase.activity..rotational.mechanism	0.558208	1	F58F12.1, asb-1
GO.0003713..transcription.coactivator.activity	0.352047	1	T01C3.2, taf-11.1, taf-7.1, bro-1, eya-1, taf-11.3
GO.0045893..positive.regulation.of.transcription..DNA.templated	0.906568	1	T01C3.2
GO.0006754..ATP.biosynthetic.process	0.0390959	1	asg-2, F58F12.1, R53.4, asg-1
GO.0015992..proton.transport	0.206165	1	nstp-3, vha-18, asg-2, srf-3, F58F12.1, R53.4, asg-1, Y82E9BR.3, vha-1
GO.0004767..sphingomyelin.phosphodiesterase.activity	1	1	NA
GO.0006665..sphingolipid.metabolic.process	0.866964	1	sms-2, F53B1.2, spp-10, lagr-1
GO.0006685..sphingomyelin.catabolic.process	1	1	NA
GO.0016798..hydrolase.activity..acting.on.glycosyl.bonds	0.746549	1	gana-1, cht-1, mans-3, cht-3, tre-5, chhy-1
GO.0046513..ceramide.biosynthetic.process	0.694249	1	lagr-1
GO.0004190..aspartic.type.endopeptidase.activity	0.281424	1	asp-6, asp-2, asp-1, sel-12, C01G5.6
GO.0098591..external.side.of.apical.plasma.membrane	0.179186	1	asp-1
GO.0070265..necrotic.cell.death	0.971465	1	lgg-3
GO.0000122..negative.regulation.of.transcription.from.RNA.polymerase.II.promoter	0.160386	1	pos-1, ceh-39, hbl-1, sex-1, sdc-2, daf-6, pag-3, zag-1, ubc-9, nsy-7, prdx-2, atf-2, smo-1, mbd-2, ces-1
GO.0001012..RNA.polymerase.II.regulatory.region.DNA.binding	0.220716	1	atf-2, ces-2
GO.0001078..transcriptional.repressor.activity..RNA.polymerase.II.core.promoter.proximal.region.sequence.specific.binding	0.546122	1	atf-2
GO.0007623..circadian.rhythm	0.179186	1	atf-2
GO.0000977..RNA.polymerase.II.regulatory.region.sequence.specific.DNA.binding	0.0708613	1	ceh-27, zip-5, end-1, end-3, mls-2, hbl-1, sox-2, sex-1, fkh-3, ceh-36, unc-3, egl-38, aptf-2, aptf-4, hlh-2, unc-86, tbx-9
GO.0006357..regulation.of.transcription.from.RNA.polymerase.II.promoter	0.604883	1	egl-46, bir-1, ceh-27, elpc-3, zip-5, hbl-1, taf-7.1, fkh-3, fkh-4, zip-11, pes-1, aptf-2, mnat-1, hlh-14, T24H10.1, Y73E7A.2, F26F4.8, tbx-9
GO.0031929..TOR.signaling	1	1	NA
GO.0006990..positive.regulation.of.transcription.from.RNA.polymerase.II.promoter.involved.in.unfolded.protein.response	1	1	NA
GO.0035966..response.to.topologically.incorrect.protein	1	1	NA
GO.1904576..response.to.tunicamycin	1	1	NA
GO.0045089..positive.regulation.of.innate.immune.response	1	1	NA
GO.0045824..negative.regulation.of.innate.immune.response	1	1	NA
GO.0051019..mitogen.activated.protein.kinase.binding	1	1	NA
GO.0005975..carbohydrate.metabolic.process	0.702919	1	fut-2, lys-3, gana-1, F11A5.5, cht-1, lgx-1, C55B6.1, F48E3.8, cht-3, lys-10, lys-4, lys-5, lys-6, chhy-1, chil-18, F17B5.6, Y105E8B.9, T03F6.3
GO.0043169..cation.binding	1	1	NA
GO.0000785..chromatin	0.809423	1	K09H9.2, smz-2
GO.0005743..mitochondrial.inner.membrane	0.202713	1	immt-2, isp-1, ant-1.4, ant-1.3, coq-3, sco-1, phb-2, F58F12.1, atad-3, sdhd-1, mppa-1, abtm-1, D2030.4, sdha-2, ddp-1, let-754, ZK1236.1, cco-2, F45G2.8, ant-1.1
GO.0005929..cilium	0.255007	1	ifta-2, nphp-1, mks-5, daf-25, arl-13, che-13, kin-3, C54C6.6
GO.0007617..mating.behavior	0.694249	1	fox-1
GO.0015991..ATP.hydrolysis.coupled.proton.transport	0.8306	1	vha-18, Y82E9BR.3, vha-1
GO.0016820..hydrolase.activity..acting.on.acid.anhydrides..catalyzing.transmembrane.movement.of.substances	0.794046	1	vha-18
GO.0019904..protein.domain.specific.binding	0.924563	1	par-5, tac-1, elb-1
GO.0033178..proton.transporting.two.sector.ATPase.complex..catalytic.domain	1	1	NA
GO.0043050..pharyngeal.pumping	0.913271	1	slo-1, alp-1, csk-1
GO.0045261..proton.transporting.ATP.synthase.complex..catalytic.core.F.1.	0.627474	1	F58F12.1
GO.0046034..ATP.metabolic.process	0.830971	1	let-754
GO.0042776..mitochondrial.ATP.synthesis.coupled.proton.transport	0.0847962	1	cyc-1, cco-1
GO.0010494..cytoplasmic.stress.granule	0.498646	1	ife-2, gtbp-1
GO.0010603..regulation.of.cytoplasmic.mRNA.processing.body.assembly	1	1	NA
GO.0034063..stress.granule.assembly	1	1	NA
GO.0040022..feminization.of.hermaphroditic.germ.line	0.672752	1	mog-2, cacn-1, rnp-6, ncbp-2, pas-5, C07A9.2
GO.0044822..poly.A..RNA.binding	0.937076	1	nxf-2
GO.0051729..germline.cell.cycle.switching..mitotic.to.meiotic.cell.cycle	0.951482	1	his-24, misc-1, mog-2, ccf-1
GO.0006821..chloride.transport	0.671955	1	lgc-54, lgc-47, lgc-21, icln-1, best-13, best-1, lgc-27, exc-4
GO.0008068..extracellular.glutamate.gated.chloride.channel.activity	0.705497	1	lgc-21, lgc-27
GO.0008144..drug.binding	1	1	NA
GO.0031987..locomotion.involved.in.locomotory.behavior	1	1	NA
GO.0042493..response.to.drug	0.471186	1	slo-1, unc-1, pgp-5
GO.0043051..regulation.of.pharyngeal.pumping	0.991445	1	phb-2, unc-119
GO.1902476..chloride.transmembrane.transport	0.938015	1	lgc-54, lgc-47, lgc-21, best-13, best-1, lgc-27, exc-4
GO.0001508..action.potential	1	1	NA
GO.0000779..condensed.chromosome..centromeric.region	0.627474	1	baf-1
GO.0003690..double.stranded.DNA.binding	0.779068	1	rfs-1, baf-1
GO.0005654..nucleoplasm	0.102858	1	T01C3.2, unc-97, mdf-2, mog-2, let-858, K09H9.2, crn-1, dao-5, sbds-1, baf-1, hal-2
GO.0006997..nucleus.organization	0.765177	1	npp-1, lmn-1, his-68, baf-1
GO.0010165..response.to.X.ray	0.558208	1	emr-1, baf-1
GO.0051276..chromosome.organization	0.830971	1	baf-1
GO.0016049..cell.growth	1	1	NA
GO.0002009..morphogenesis.of.an.epithelium	0.650602	1	bus-18, dgn-1, eff-1
GO.0007155..cell.adhesion	0.84723	1	pat-6, cdh-8, T13B5.9, pat-4, cdh-12, cdh-1, ceh-43
GO.0007265..Ras.protein.signal.transduction	0.498646	1	eor-2, cav-1
GO.0008134..transcription.factor.binding	0.777068	1	taf-11.1, taf-7.1, hsp-60, unc-86, taf-11.3
GO.0016342..catenin.complex	1	1	NA
GO.0019903..protein.phosphatase.binding	1	1	NA
GO.0034333..adherens.junction.assembly	1	1	NA
GO.0034599..cellular.response.to.oxidative.stress	0.749058	1	txl-1
GO.0042659..regulation.of.cell.fate.specification	0.980786	1	npp-1
GO.0045294..alpha.catenin.binding	1	1	NA
GO.0045296..cadherin.binding	1	1	NA
GO.0048513..animal.organ.development	1	1	NA
GO.0006520..cellular.amino.acid.metabolic.process	0.56658	1	got-1.2, C10C5.3, C10C5.5
GO.0007606..sensory.perception.of.chemical.stimulus	0.8306	1	srg-31, ceh-36, arl-13
GO.0016831..carboxy.lyase.activity	0.923324	1	Y48B6A.13
GO.0019752..carboxylic.acid.metabolic.process	1	1	NA
GO.0030170..pyridoxal.phosphate.binding	0.981385	1	got-1.2, F13B12.4, F09E5.8, B0205.6
GO.0034607..turning.behavior.involved.in.mating	0.434146	1	madd-2, nphp-1
GO.0036468..L.dopa.decarboxylase.activity	1	1	NA
GO.0042416..dopamine.biosynthetic.process	1	1	NA
GO.0042427..serotonin.biosynthetic.process	1	1	NA
GO.0004497..monooxygenase.activity	0.999957	1	fmo-1, fmo-2, cyp-13A5, agmo-1
GO.0004505..phenylalanine.4.monooxygenase.activity	1	1	NA
GO.0004510..tryptophan.5.monooxygenase.activity	1	1	NA
GO.0005506..iron.ion.binding	0.999962	1	cyp-31A5, cyp-13A5, gbh-1, jmjc-1, agmo-1
GO.0006559..L.phenylalanine.catabolic.process	1	1	NA
GO.0006569..tryptophan.catabolic.process	1	1	NA
GO.0006571..tyrosine.biosynthetic.process	1	1	NA
GO.0009072..aromatic.amino.acid.family.metabolic.process	1	1	NA
GO.0016714..oxidoreductase.activity..acting.on.paired.donors..with.incorporation.or.reduction.of.molecular.oxygen..reduced.pteridine.as.one.donor..and.incorporation.of.one.atom.of.oxygen	1	1	NA
GO.0042438..melanin.biosynthetic.process	1	1	NA
GO.0005113..patched.binding	1	1	NA
GO.0005119..smoothened.binding	1	1	NA
GO.0030030..cell.projection.organization	0.610109	1	nphp-1, mks-5, unc-119
GO.0034464..BBSome	0.694249	1	K07C11.10
GO.0035058..nonmotile.primary.cilium.assembly	0.196943	1	mksr-1, fkh-2, mksr-2, T26A8.2, nphp-1, mks-5, che-13
GO.0035721..intraciliary.retrograde.transport	0.794046	1	che-13
GO.0036064..ciliary.basal.body	0.91183	1	che-13, C54C6.6
GO.0061512..protein.localization.to.cilium	1	1	NA
GO.0031514..motile.cilium	1	1	NA
GO.1903441..protein.localization.to.ciliary.membrane	1	1	NA
GO.0005198..structural.molecule.activity	0.102858	1	ifc-1, clic-1, ifd-2, ifa-4, stn-2, ifp-1, ifa-3, ifb-2, lmn-1, ben-1, him-10
GO.0006890..retrograde.vesicle.mediated.transport..Golgi.to.ER	0.937076	1	rab-6.2
GO.0008355..olfactory.learning	0.275215	1	elpc-3, nrde-3, elpc-1, hpl-2
GO.0042073..intraciliary.transport	0.744549	1	arl-13, che-13
GO.0042384..cilium.assembly	0.573855	1	K07C11.10, mks-5, unc-101, unc-119
GO.0097546..ciliary.base	0.149689	1	ifta-2, nphp-1
GO.1904107..protein.localization.to.microvillus.membrane	0.447014	1	daf-25
GO.0004089..carbonate.dehydratase.activity	1	1	NA
GO.0000045..autophagosome.assembly	0.753575	1	emc-6, atg-16.2, lgg-3
GO.0000407..pre.autophagosomal.structure	1	1	NA
GO.0006914..autophagy	0.472654	1	lbp-3, dct-1, atg-16.2, epg-2, sepa-1, lgg-3, dlc-1
GO.0009267..cellular.response.to.starvation	1	1	NA
GO.0012501..programmed.cell.death	0.809423	1	crt-1, ced-8
GO.0016023..cytoplasmic..membrane.bounded.vesicle	1	1	NA
GO.0032258..CVT.pathway	1	1	NA
GO.0034271..phosphatidylinositol.3.kinase.complex..class.III..type.I	1	1	NA
GO.0034272..phosphatidylinositol.3.kinase.complex..class.III..type.II	1	1	NA
GO.0040014..regulation.of.multicellular.organism.growth	0.435105	1	bir-1, dpy-30, dpy-2, rad-8, iftb-1
GO.0043277..apoptotic.cell.clearance	0.498646	1	cmd-1, crn-2
GO.0044804..nucleophagy	0.906568	1	lgg-3
GO.0045138..nematode.male.tail.tip.morphogenesis	0.0293209	1	dpy-30, ptr-4, unc-6, vab-3, mig-2, eor-2, efn-4, ced-10, unc-129, egl-38, eff-1, iff-2, ram-2, ptr-18, plx-2, mab-20, bro-1, hlh-2, lin-53, kal-1
GO.0045324..late.endosome.to.vacuole.transport	1	1	NA
GO.0005874..microtubule	0.286937	1	vab-8, tbcb-1, bmk-1, tbb-4, tba-8, klp-11, tba-6, tba-1, tba-2, C54C6.6, ben-1, dlc-1, rmd-1, lis-1
GO.0007017..microtubule.based.process	0.0790335	1	tbb-4, tba-8, tba-6, tba-1, tba-2, ben-1, dlc-1, lis-1
GO.0004869..cysteine.type.endopeptidase.inhibitor.activity	0.293598	1	tag-196, bir-1
GO.0009966..regulation.of.signal.transduction	0.694249	1	bir-1
GO.0016573..histone.acetylation	0.809423	1	bir-1, elpc-3
GO.1990001..inhibition.of.cysteine.type.endopeptidase.activity.involved.in.apoptotic.process	0.179186	1	bir-1
GO.0060109..medial.layer.of.collagen.and.cuticulin.based.cuticle.extracellular.matrix	1	1	NA
GO.0030312..external.encapsulating.structure	1	1	NA
GO.0004601..peroxidase.activity	0.781952	1	skpo-2, skpo-1, T06D8.10
GO.0016174..NAD.P.H.oxidase.activity	0.447014	1	R07B7.4
GO.0018149..peptide.cross.linking	1	1	NA
GO.0020037..heme.binding	0.999919	1	glb-19, cyp-31A5, skpo-2, skpo-1, cyp-13A5, sdhd-1, T06D8.10, cyc-1
GO.0042338..cuticle.development.involved.in.collagen.and.cuticulin.based.cuticle.molting.cycle	0.365391	1	dpy-3, mlt-10
GO.0042744..hydrogen.peroxide.catabolic.process	0.694249	1	prdx-2
GO.0098869..cellular.oxidant.detoxification	0.645082	1	skpo-2, prdx-2, skpo-1, T06D8.10, gsr-1
GO.0008236..serine.type.peptidase.activity	0.789437	1	dpf-2, immp-2, try-1, immp-1
GO.0044254..multicellular.organismal.protein.catabolic.process	1	1	NA
GO.0000922..spindle.pole	0.520178	1	bmk-1, tac-1, rmd-1
GO.0003777..microtubule.motor.activity	0.765177	1	vab-8, bmk-1, klp-11, W05B2.7
GO.0005871..kinesin.complex	0.781952	1	vab-8, bmk-1, klp-11
GO.0007018..microtubule.based.movement	0.545851	1	vab-8, bmk-1, klp-11, W05B2.7, lis-1
GO.0008017..microtubule.binding	0.907703	1	vab-8, bmk-1, klp-11, lis-1
GO.0008574..ATP.dependent.microtubule.motor.activity..plus.end.directed	0.365391	1	vab-8, bmk-1
GO.1902845..negative.regulation.of.mitotic.spindle.elongation	0.179186	1	bmk-1
GO.0004077..biotin..acetyl.CoA.carboxylase..ligase.activity	1	1	NA
GO.0006464..cellular.protein.modification.process	0.948362	1	ubl-5
GO.0003682..chromatin.binding	0.852549	1	end-1, end-3, nhr-25, taf-2, hpl-2
GO.0003712..transcription.cofactor.activity	0.612531	1	E01B7.2, sepa-1
GO.0030424..axon	0.982729	1	odr-2, fmi-1, unc-1, ddr-2, tsp-17, unc-6, eat-20, efn-4, vab-2, tba-1, kin-3, odr-4, unc-119
GO.0030512..negative.regulation.of.transforming.growth.factor.beta.receptor.signaling.pathway	1	1	NA
GO.0042393..histone.binding	0.558208	1	chaf-2, lmn-1
GO.0000724..double.strand.break.repair.via.homologous.recombination	0.906568	1	hus-1
GO.0006289..nucleotide.excision.repair	0.859173	1	hus-1, mrt-2
GO.0031436..BRCA1.BARD1.complex	1	1	NA
GO.0035066..positive.regulation.of.histone.acetylation	1	1	NA
GO.0035067..negative.regulation.of.histone.acetylation	1	1	NA
GO.0045717..negative.regulation.of.fatty.acid.biosynthetic.process	1	1	NA
GO.0051307..meiotic.chromosome.separation	0.694249	1	ZK430.5
GO.0070531..BRCA1.A.complex	1	1	NA
GO.0071158..positive.regulation.of.cell.cycle.arrest	1	1	NA
GO.0008446..GDP.mannose.4.6.dehydratase.activity	1	1	NA
GO.0017085..response.to.insecticide	1	1	NA
GO.0019673..GDP.mannose.metabolic.process	1	1	NA
GO.0030017..sarcomere	0.451183	1	W03F9.1, stn-2, pfd-2, set-18
GO.0042350..GDP.L.fucose.biosynthetic.process	1	1	NA
GO.0042351..de.novo.GDP.L.fucose.biosynthetic.process	1	1	NA
GO.0075015..formation.of.infection.structure.on.or.near.host	0.627474	1	bre-5
GO.0000139..Golgi.membrane	0.919864	1	nstp-3, nstp-10, sel-12, K02E10.1, memb-1, cav-1, bre-5, srf-3, odr-4, pen-2
GO.0006486..protein.glycosylation	0.129219	1	C05E4.15, T09F5.1, uggt-1, F48F7.3, bus-17, bre-5, dpm-3, F53C3.11, T05A7.11, ostd-1, dad-1, C38H2.2, Y47D3A.1, BE10.3
GO.0008376..acetylgalactosaminyltransferase.activity	0.627474	1	bre-5
GO.0008378..galactosyltransferase.activity	0.0870606	1	T09F5.1, F48F7.3, bus-17, bre-5
GO.0016757..transferase.activity..transferring.glycosyl.groups	0.836065	1	ugt-15, T09F5.1, gyg-1, uggt-1, F48F7.3, bus-17, bus-4, ugt-24, bre-5, T27F7.4, B0228.7, ugt-26, ostd-1, dad-1, C38H2.2
GO.0006688..glycosphingolipid.biosynthetic.process	1	1	NA
GO.0019187..beta.1.4.mannosyltransferase.activity	1	1	NA
GO.0097502..mannosylation	0.627474	1	T27F7.4
GO.0009636..response.to.toxic.substance	0.749058	1	bre-5
GO.0033207..beta.1.4.N.acetylgalactosaminyltransferase.activity	1	1	NA
GO.0045747..positive.regulation.of.Notch.signaling.pathway	0.471186	1	sel-12, tsp-21, bre-5
GO.0016051..carbohydrate.biosynthetic.process	0.326275	1	bre-5
GO.0000126..transcription.factor.TFIIIB.complex	1	1	NA
GO.0006352..DNA.templated.transcription..initiation	0.661579	1	ref-2, taf-6.1
GO.0006384..transcription.initiation.from.RNA.polymerase.III.promoter	0.546122	1	M106.7
GO.0019827..stem.cell.population.maintenance	0.326275	1	bro-1
GO.1903506..regulation.of.nucleic.acid.templated.transcription	0.0749515	1	taf-11.1, bro-1, taf-11.3
GO.0000775..chromosome..centromeric.region	0.066883	1	csc-1, kbp-3, K09H9.2, him-10, cpar-1, ran-1, lis-1
GO.0000776..kinetochore	0.421473	1	kbp-3, tac-1, him-10, cpar-1, ran-1, lis-1
GO.0000777..condensed.chromosome.kinetochore	0.143549	1	kbp-3, him-10, cpar-1, ran-1, lis-1
GO.0007094..mitotic.spindle.assembly.checkpoint	0.365391	1	mdf-2, bub-3
GO.0010940..positive.regulation.of.necrotic.cell.death	1	1	NA
GO.0044281..small.molecule.metabolic.process	1	1	NA
GO.0005509..calcium.ion.binding	0.538474	1	cmd-1, crt-1, gsnl-1, T04F3.2, fmi-1, calu-1, mans-3, dgn-1, H36L18.1, slt-1, eat-20, cdh-8, clec-78, nlr-1, Y64G10A.7, cbn-1, tnc-2, F14B4.1, calm-1, bath-25, H10E21.4, cdh-12, cdh-1, nex-3, dex-1, zmp-1, fbn-1
GO.0004714..transmembrane.receptor.protein.tyrosine.kinase.activity	0.923324	1	ddr-2
GO.0005109..frizzled.binding	0.434146	1	cwn-1, dsh-1
GO.0007411..axon.guidance	0.077612	1	madd-2, cfz-2, egl-46, unc-70, vab-8, unc-39, hst-6, unc-6, vab-3, sdn-1, mig-2, slt-1, efn-4, ced-10, vab-2, zag-1, unc-129, mab-20, rnp-6, Y105E8B.9
GO.0017147..Wnt.protein.binding	0.159127	1	cfz-2, sfrp-1, mom-5
GO.0018108..peptidyl.tyrosine.phosphorylation	0.8503	1	Y50D4B.6, ddr-2, wee-1.1, csk-1
GO.0031594..neuromuscular.junction	1	1	NA
GO.0032809..neuronal.cell.body.membrane	0.906568	1	lag-2
GO.0043204..perikaryon	0.851219	1	ddr-2, kin-3, uev-1
GO.0045200..establishment.of.neuroblast.polarity	1	1	NA
GO.0005869..dynactin.complex	0.260396	1	arp-11, dnc-3, dnc-5
GO.0008290..F.actin.capping.protein.complex	1	1	NA
GO.0051693..actin.filament.capping	0.447014	1	gsnl-1
GO.0000578..embryonic.axis.specification	1	1	NA
GO.0000902..cell.morphogenesis	0.886152	1	egl-26
GO.0010591..regulation.of.lamellipodium.assembly	1	1	NA
GO.0051490..negative.regulation.of.filopodium.assembly	1	1	NA
GO.0007631..feeding.behavior	0.661579	1	glr-1, unc-119
GO.0008504..monoamine.transmembrane.transporter.activity	1	1	NA
GO.0015844..monoamine.transport	1	1	NA
GO.0004511..tyrosine.3.monooxygenase.activity	1	1	NA
GO.0007638..mechanosensory.behavior	0.586492	1	lag-2, snx-1, rab-6.2, vps-4, mec-8, unc-86
GO.0032094..response.to.food	0.906568	1	glr-1
GO.0042136..neurotransmitter.biosynthetic.process	1	1	NA
GO.0042417..dopamine.metabolic.process	1	1	NA
GO.0042423..catecholamine.biosynthetic.process	1	1	NA
GO.0003934..GTP.cyclohydrolase.I.activity	1	1	NA
GO.0006729..tetrahydrobiopterin.biosynthetic.process	1	1	NA
GO.0035998..7.8.dihydroneopterin.3.triphosphate.biosynthetic.process	1	1	NA
GO.0046654..tetrahydrofolate.biosynthetic.process	1	1	NA
GO.0005901..caveola	0.326275	1	cav-1
GO.0009898..cytoplasmic.side.of.plasma.membrane	0.114116	1	mig-2, ced-10, cav-1
GO.0030133..transport.vesicle	0.0847962	1	cav-1, rab-8
GO.0046662..regulation.of.oviposition	0.918584	1	cln-3.3, cav-1, daf-25, unc-119
GO.0048471..perinuclear.region.of.cytoplasm	0.654534	1	daf-21, sel-12, tsp-17, dpy-7, egrh-1, ubxn-2, syx-4, cav-1, srf-3, ced-9, lis-1
GO.0060473..cortical.granule	0.365391	1	syx-4, cav-1
GO.0070836..caveola.assembly	0.326275	1	cav-1
GO.0005319..lipid.transporter.activity	1	1	NA
GO.0007166..cell.surface.receptor.signaling.pathway	0.224723	1	cfz-2, tsp-17, tsp-21, mom-5, B0244.15, tsp-2, tsp-1
GO.0007567..parturition	1	1	NA
GO.0004402..histone.acetyltransferase.activity	0.937076	1	elpc-3
GO.0004468..lysine.N.acetyltransferase.activity..acting.on.acetyl.phosphate.as.donor	1	1	NA
GO.0010975..regulation.of.neuron.projection.development	0.326275	1	unc-3
GO.0016746..transferase.activity..transferring.acyl.groups	0.954759	1	W03F9.4, cpt-4, cpt-6, bus-18, elpc-3, oac-53, oac-14, mboa-1, oac-51, hhat-1, mboa-6
GO.0018393..internal.peptidyl.lysine.acetylation	1	1	NA
GO.0043065..positive.regulation.of.apoptotic.process	0.244376	1	eif-3.K, egl-1, dct-1, unc-3, ant-1.1
GO.0061629..RNA.polymerase.II.sequence.specific.DNA.binding.transcription.factor.binding	1	1	NA
GO.0005244..voltage.gated.ion.channel.activity	0.924818	1	slo-1, exc-4
GO.0005245..voltage.gated.calcium.channel.activity	0.794046	1	clhm-1
GO.0005261..cation.channel.activity	0.694249	1	Y57A10A.28
GO.0005262..calcium.channel.activity	1	1	NA
GO.0005891..voltage.gated.calcium.channel.complex	0.694249	1	orai-1
GO.0006816..calcium.ion.transport	0.945565	1	sel-12, ncx-3
GO.0008332..low.voltage.gated.calcium.channel.activity	1	1	NA
GO.0034765..regulation.of.ion.transmembrane.transport	0.924818	1	slo-1, exc-4
GO.0045760..positive.regulation.of.action.potential	1	1	NA
GO.0051899..membrane.depolarization	1	1	NA
GO.0070588..calcium.ion.transmembrane.transport	0.945565	1	clhm-1, orai-1
GO.0086010..membrane.depolarization.during.action.potential	1	1	NA
GO.0007528..neuromuscular.junction.development	1	1	NA
GO.0008331..high.voltage.gated.calcium.channel.activity	1	1	NA
GO.0051924..regulation.of.calcium.ion.transport	1	1	NA
GO.0061199..striated.muscle.contraction.involved.in.embryonic.body.morphogenesis	0.0835123	1	myo-3, ttr-6, hnd-1, pat-9, pat-6, unc-120, pat-4
GO.1901385..regulation.of.voltage.gated.calcium.channel.activity	1	1	NA
GO.0004518..nuclease.activity	0.777068	1	C08B6.8, crn-1, disl-2, ZK1098.3, ccf-1
GO.0004535..poly.A..specific.ribonuclease.activity	0.326275	1	ccf-1
GO.0006417..regulation.of.translation	0.386772	1	ife-3, ife-2, ife-4, lin-56, ifet-1, ccf-1
GO.0017148..negative.regulation.of.translation	0.068086	1	ntl-2, sup-26, ifet-1, ntl-9, ntl-3, ccf-1
GO.0031047..gene.silencing.by.RNA	0.493623	1	nrde-3, ncbp-2, wdr-5.1, ccf-1
GO.0043186..P.granule	0.85331	1	pgl-3, pos-1, snr-1, snr-3, snr-7, ifet-1, pgl-2, ccf-1
GO.0090503..RNA.phosphodiester.bond.hydrolysis..exonucleolytic	0.114116	1	C08B6.8, disl-2, ccf-1
GO.0004129..cytochrome.c.oxidase.activity	0.0266599	1	B0035.18, F26E4.6, cco-1, ZC434.7, Y71H2AM.5, cco-2
GO.0016705..oxidoreductase.activity..acting.on.paired.donors..with.incorporation.or.reduction.of.molecular.oxygen	0.999995	1	cyp-31A5, cyp-13A5
GO.0010332..response.to.gamma.radiation	0.293598	1	clec-47, ZK970.7
GO.0005832..chaperonin.containing.T.complex	0.0847962	1	cct-1, cct-5
GO.0006270..DNA.replication.initiation	1	1	NA
GO.0004721..phosphoprotein.phosphatase.activity	0.982183	1	cdc-25.2, C17H12.3, ssup-72, pgam-5, eya-1, F42G9.1, cdc-25.3
GO.0004722..protein.serine.threonine.phosphatase.activity	0.948362	1	F42G9.1
GO.0004725..protein.tyrosine.phosphatase.activity	0.865901	1	cdc-25.2, Y39B6A.30, C17H12.3, C17H12.5, K07F5.6, F55H12.5, eya-1, cdc-25.3
GO.0006470..protein.dephosphorylation	0.990749	1	cdc-25.2, Y39B6A.30, C17H12.3, C17H12.5, K07F5.6, ssup-72, pgam-5, F28C6.8, F55H12.5, eya-1, F42G9.1, cdc-25.3
GO.0007096..regulation.of.exit.from.mitosis	1	1	NA
GO.0008138..protein.tyrosine.serine.threonine.phosphatase.activity	0.957625	1	F28C6.8
GO.0016311..dephosphorylation	0.994206	1	F44E7.2, pho-14, tag-231
GO.0016791..phosphatase.activity	0.830971	1	F44E7.2
GO.0035335..peptidyl.tyrosine.dephosphorylation	0.901231	1	cdc-25.2, Y39B6A.30, C17H12.3, C17H12.5, K07F5.6, F28C6.8, F55H12.5, eya-1, cdc-25.3
GO.0040038..polar.body.extrusion.after.meiotic.divisions	0.937076	1	csc-1
GO.0045786..negative.regulation.of.cell.cycle	1	1	NA
GO.0060284..regulation.of.cell.development	1	1	NA
GO.0071850..mitotic.cell.cycle.arrest	1	1	NA
GO.1990023..mitotic.spindle.midzone	0.627474	1	csc-1
GO.0000087..mitotic.M.phase	0.0847962	1	cdc-25.2, cdc-25.3
GO.0000212..meiotic.spindle.organization	1	1	NA
GO.0000132..establishment.of.mitotic.spindle.orientation	0.155031	1	mls-2, npp-1, par-5, src-1, skr-2, tba-1, tba-2, lis-1
GO.0007163..establishment.or.maintenance.of.cell.polarity	1	1	NA
GO.0032970..regulation.of.actin.filament.based.process	1	1	NA
GO.0040001..establishment.of.mitotic.spindle.localization	1	1	NA
GO.0055037..recycling.endosome	0.779068	1	rab-14, glr-1
GO.0004126..cytidine.deaminase.activity	0.326275	1	cdd-2
GO.0006217..deoxycytidine.catabolic.process	0.326275	1	cdd-2
GO.0009451..RNA.modification	0.0400818	1	irg-1, T24A6.7, ZK287.7, B0024.11, cdd-2, K07E8.7, Y47D3A.14
GO.0009972..cytidine.deamination	0.326275	1	cdd-2
GO.0016070..RNA.metabolic.process	1	1	NA
GO.0047844..deoxycytidine.deaminase.activity	0.326275	1	cdd-2
GO.0005385..zinc.ion.transmembrane.transporter.activity	0.987063	1	F55F8.9
GO.0006812..cation.transport	1	1	NA
GO.0006829..zinc.II.ion.transport	1	1	NA
GO.0008324..cation.transmembrane.transporter.activity	1	1	NA
GO.0010043..response.to.zinc.ion	1	1	NA
GO.0046579..positive.regulation.of.Ras.protein.signal.transduction	0.749058	1	riok-1
GO.0061088..regulation.of.sequestering.of.zinc.ion	1	1	NA
GO.0071294..cellular.response.to.zinc.ion	1	1	NA
GO.0071577..zinc.II.ion.transmembrane.transport	0.987063	1	F55F8.9
GO.0007156..homophilic.cell.adhesion.via.plasma.membrane.adhesion.molecules	0.232444	1	fmi-1, cdh-8, cdh-12, cdh-1
GO.0097402..neuroblast.migration	1	1	NA
GO.0008306..associative.learning	0.749058	1	glr-1
GO.0001556..oocyte.maturation	0.809423	1	cyb-1, cdk-1
GO.0004693..cyclin.dependent.protein.serine.threonine.kinase.activity	0.434146	1	cdk-4, cdk-1
GO.0005815..microtubule.organizing.center	0.493623	1	evl-20, smo-1, cdk-1, lis-1
GO.0008353..RNA.polymerase.II.carboxy.terminal.domain.kinase.activity	0.749058	1	cdk-1
GO.0032436..positive.regulation.of.proteasomal.ubiquitin.dependent.protein.catabolic.process	0.809423	1	T02C1.1, cdk-1
GO.0045836..positive.regulation.of.meiotic.nuclear.division	0.447014	1	cdk-1
GO.0051446..positive.regulation.of.meiotic.cell.cycle	0.447014	1	cdk-1
GO.0071902..positive.regulation.of.protein.serine.threonine.kinase.activity	0.546122	1	cdk-1
GO.0007530..sex.determination	0.0749515	1	cdk-4, sea-1, cyd-1
GO.0008584..male.gonad.development	0.293598	1	cdk-4, cyd-1
GO.0009791..post.embryonic.development	0.650602	1	ppt-1, cdk-4, unc-85
GO.0032877..positive.regulation.of.DNA.endoreduplication	0.0847962	1	cdk-4, cyd-1
GO.0044843..cell.cycle.G1.S.phase.transition	0.0320972	1	cdk-4, cyd-1
GO.1900087..positive.regulation.of.G1.S.transition.of.mitotic.cell.cycle	0.326275	1	cdk-4
GO.0010468..regulation.of.gene.expression	0.646367	1	crt-1, hel-1, cacn-1, F57B9.3
GO.0030951..establishment.or.maintenance.of.microtubule.cytoskeleton.polarity	1	1	NA
GO.0032880..regulation.of.protein.localization	0.966767	1	cmd-1, ain-1
GO.0048489..synaptic.vesicle.transport	0.957625	1	lis-1
GO.0051222..positive.regulation.of.protein.transport	1	1	NA
GO.0051965..positive.regulation.of.synapse.assembly	1	1	NA
GO.1902803..regulation.of.synaptic.vesicle.transport	1	1	NA
GO.1904799..regulation.of.neuron.remodeling	1	1	NA
GO.1904810..negative.regulation.of.dense.core.granule.transport	1	1	NA
GO.1904811..positive.regulation.of.dense.core.granule.transport	1	1	NA
GO.2000331..regulation.of.terminal.button.organization	1	1	NA
GO.0005675..holo.TFIIH.complex	0.546122	1	mnat-1
GO.0009299..mRNA.transcription	1	1	NA
GO.0045448..mitotic.cell.cycle..embryonic	1	1	NA
GO.0051726..regulation.of.cell.cycle	0.244376	1	cmd-1, dct-1, dot-1.4, mdf-2, Y71F9B.6
GO.0000082..G1.S.transition.of.mitotic.cell.cycle	1	1	NA
GO.0003729..mRNA.binding	0.228234	1	fox-1, F08B4.7, rps-5, mrps-7, lin-28, cfim-1, Y119D3B.12, rnp-7
GO.0003730..mRNA.3.UTR.binding	0.650602	1	pos-1, lin-28, sup-26
GO.0007076..mitotic.chromosome.condensation	1	1	NA
GO.1990170..stress.response.to.cadmium.ion	0.293598	1	pgp-5, pgp-4
GO.0006260..DNA.replication	0.626644	1	rfc-2, pcn-1, unc-85, tofu-6, psf-3, crn-1, dlc-1, mtss-1, pri-1
GO.0001845..phagolysosome.assembly	1	1	NA
GO.0001891..phagocytic.cup	0.627474	1	src-1
GO.0005044..scavenger.receptor.activity	1	1	NA
GO.0030670..phagocytic.vesicle.membrane	1	1	NA
GO.0031260..pseudopodium.membrane	1	1	NA
GO.0031532..actin.cytoskeleton.reorganization	0.627474	1	pat-6
GO.0034620..cellular.response.to.unfolded.protein	1	1	NA
GO.0043654..recognition.of.apoptotic.cell	1	1	NA
GO.0005070..SH3.SH2.adaptor.activity	1	1	NA
GO.0006909..phagocytosis	0.749058	1	ced-10
GO.0009967..positive.regulation.of.signal.transduction	1	1	NA
GO.0032403..protein.complex.binding	0.861278	1	him-10
GO.0004197..cysteine.type.endopeptidase.activity	0.789437	1	tag-196, fce-2, ZK430.5, cpz-1
GO.0008234..cysteine.type.peptidase.activity	0.947711	1	ubh-3, tag-196, ubh-4, usp-14, cpz-1
GO.0016540..protein.autoprocessing	0.220716	1	wrt-8, wrt-1
GO.0030155..regulation.of.cell.adhesion	0.114116	1	vab-3, efn-4, mab-20
GO.0042981..regulation.of.apoptotic.process	0.951482	1	cmd-1, cst-1, unc-129, ced-9
GO.0097194..execution.phase.of.apoptosis	0.365391	1	snx-1, ced-8
GO.0097200..cysteine.type.endopeptidase.activity.involved.in.execution.phase.of.apoptosis	1	1	NA
GO.1902742..apoptotic.process.involved.in.development	0.220716	1	egl-1, ced-9
GO.0008635..activation.of.cysteine.type.endopeptidase.activity.involved.in.apoptotic.process.by.cytochrome.c	1	1	NA
GO.0008656..cysteine.type.endopeptidase.activator.activity.involved.in.apoptotic.process	1	1	NA
GO.0010954..positive.regulation.of.protein.processing	1	1	NA
GO.0016505..peptidase.activator.activity.involved.in.apoptotic.process	1	1	NA
GO.0043281..regulation.of.cysteine.type.endopeptidase.activity.involved.in.apoptotic.process	1	1	NA
GO.0043531..ADP.binding	1	1	NA
GO.0051432..BH1.domain.binding	1	1	NA
GO.0051434..BH3.domain.binding	1	1	NA
GO.0061133..endopeptidase.activator.activity	1	1	NA
GO.2001056..positive.regulation.of.cysteine.type.endopeptidase.activity	1	1	NA
GO.0017124..SH3.domain.binding	1	1	NA
GO.0019899..enzyme.binding	0.935985	1	lin-28, glr-1
GO.0032045..guanyl.nucleotide.exchange.factor.complex	1	1	NA
GO.0005124..scavenger.receptor.binding	1	1	NA
GO.0045309..protein.phosphorylated.amino.acid.binding	1	1	NA
GO.0045335..phagocytic.vesicle	0.420027	1	snx-1, lmp-1, rab-14
GO.0070782..phosphatidylserine.exposure.on.apoptotic.cell.surface	0.179186	1	ced-8
GO.0000422..mitophagy	0.687993	1	dct-1, lgg-3, ced-9
GO.0005741..mitochondrial.outer.membrane	0.133231	1	tomm-20, dct-1, tomm-22, pgam-5, tomm-40, ced-9
GO.0008630..intrinsic.apoptotic.signaling.pathway.in.response.to.DNA.damage	0.0749515	1	hus-1, ced-9, mrt-2
GO.0010636..positive.regulation.of.mitochondrial.fusion	0.179186	1	ced-9
GO.0031090..organelle.membrane	0.367291	1	fmo-1, fmo-2, ced-9
GO.0043069..negative.regulation.of.programmed.cell.death	0.0320972	1	ces-1, ced-9
GO.0097192..extrinsic.apoptotic.signaling.pathway.in.absence.of.ligand	0.179186	1	ced-9
GO.2001243..negative.regulation.of.intrinsic.apoptotic.signaling.pathway	0.179186	1	ced-9
GO.0008045..motor.neuron.axon.guidance	0.0668421	1	unc-6, mig-2, ced-10, unc-129, spon-1
GO.0010172..embryonic.body.morphogenesis	0.817936	1	unc-70, ced-10, eff-1, mab-20, tbx-9
GO.0031103..axon.regeneration	0.861278	1	ced-10
GO.0033563..dorsal.ventral.axon.guidance	0.0400818	1	madd-2, unc-6, mig-2, slt-1, ced-10, unc-129, spon-1
GO.0048812..neuron.projection.morphogenesis	0.365391	1	mig-2, ced-10
GO.0048846..axon.extension.involved.in.axon.guidance	0.037849	1	dgn-1, mig-2, sym-1, slt-1, ced-10, dma-1
GO.0050764..regulation.of.phagocytosis	0.326275	1	ced-10
GO.0097628..distal.tip.cell.migration	0.179186	1	ced-10
GO.0005547..phosphatidylinositol.3.4.5.trisphosphate.binding	0.447014	1	snx-1
GO.0006911..phagocytosis..engulfment	1	1	NA
GO.0017048..Rho.GTPase.binding	1	1	NA
GO.0035262..gonad.morphogenesis	0.224723	1	unc-6, dgn-1, pix-1, iff-2, src-1, cpz-1, hlh-2
GO.0060097..cytoskeletal.rearrangement.involved.in.phagocytosis..engulfment	1	1	NA
GO.0070064..proline.rich.region.binding	1	1	NA
GO.0070273..phosphatidylinositol.4.phosphate.binding	0.694249	1	Y47G6A.18
GO.0080025..phosphatidylinositol.3.5.bisphosphate.binding	1	1	NA
GO.0051400..BH.domain.binding	1	1	NA
GO.0007588..excretion	1	1	NA
GO.0030104..water.homeostasis	1	1	NA
GO.0060290..transdifferentiation	0.260396	1	dpy-30, rbbp-5, wdr-5.1
GO.1904081..positive.regulation.of.transcription.from.RNA.polymerase.II.promoter.involved.in.neuron.differentiation	0.326275	1	ceh-10
GO.0021520..spinal.cord.motor.neuron.cell.fate.specification	1	1	NA
GO.0007413..axonal.fasciculation	0.436345	1	unc-70, mup-2, syd-9, sdn-1, spon-1, rpl-17, mab-20, rnp-6, eif-3.H, cpn-1, Y105E8B.9, Y55D5A.1, cnd-1, tbx-9
GO.0016337..single.organismal.cell.cell.adhesion	1	1	NA
GO.0016358..dendrite.development	0.645322	1	unc-70, fkh-2, unc-6, dma-1, unc-86, K04H4.2
GO.0016048..detection.of.temperature.stimulus	0.179186	1	sel-12
GO.0030182..neuron.differentiation	0.313756	1	egl-46, cwn-1, cnd-1
GO.0040040..thermosensory.behavior	1	1	NA
GO.0009957..epidermal.cell.fate.specification	1	1	NA
GO.0045026..plasma.membrane.fusion	0.627474	1	eff-1
GO.0048859..formation.of.anatomical.boundary	1	1	NA
GO.0001228..transcriptional.activator.activity..RNA.polymerase.II.transcription.regulatory.region.sequence.specific.binding	0.56658	1	end-1, end-3, ham-1
GO.0030516..regulation.of.axon.extension	0.794046	1	swan-1
GO.0008354..germ.cell.migration	1	1	NA
GO.0008544..epidermis.development	0.794046	1	mlt-10
GO.0030728..ovulation	0.545851	1	emo-1, dlg-1, mup-2, orai-1, vha-1
GO.1900194..negative.regulation.of.oocyte.maturation	0.694249	1	egrh-1
GO.0001225..RNA.polymerase.II.transcription.coactivator.binding	1	1	NA
GO.0007498..mesoderm.development	1	1	NA
GO.0007501..mesodermal.cell.fate.specification	0.0870606	1	unc-62, ceh-34, end-3, eya-1
GO.0009786..regulation.of.asymmetric.cell.division	0.705497	1	npp-1, hlh-14
GO.0009952..anterior.posterior.pattern.specification	0.612531	1	vab-3, ubc-9
GO.0042692..muscle.cell.differentiation	0.447014	1	unc-62
GO.0043282..pharyngeal.muscle.development	0.114116	1	ceh-22, ubc-9, eff-1
GO.0034243..regulation.of.transcription.elongation.from.RNA.polymerase.II.promoter	1	1	NA
GO.0055007..cardiac.muscle.cell.differentiation	1	1	NA
GO.0050807..regulation.of.synapse.organization	1	1	NA
GO.0007548..sex.differentiation	0.807571	1	dmd-9, rsp-6, dmd-5
GO.0009888..tissue.development	0.906568	1	nhr-25
GO.0009886..post.embryonic.morphogenesis	0.546122	1	ceh-32
GO.0048665..neuron.fate.specification	0.0390959	1	unc-42, fkh-2, ref-2, ceh-36
GO.0000723..telomere.maintenance	0.558208	1	hus-1, mrt-2
GO.0000781..chromosome..telomeric.region	0.694249	1	dpy-30
GO.0003691..double.stranded.telomeric.DNA.binding	1	1	NA
GO.0008301..DNA.binding..bending	1	1	NA
GO.0016233..telomere.capping	1	1	NA
GO.0032200..telomere.organization	1	1	NA
GO.0042048..olfactory.behavior	0.396671	1	odr-2, str-31, str-124, str-173, str-148
GO.0042162..telomeric.DNA.binding	1	1	NA
GO.0043073..germ.cell.nucleus	0.208396	1	ceh-39, let-858, hus-1
GO.0006891..intra.Golgi.vesicle.mediated.transport	0.957625	1	rab-6.2
GO.0030173..integral.component.of.Golgi.membrane	0.937076	1	srf-3
GO.0008061..chitin.binding	0.0742879	1	M03E7.4, cht-1, lgx-1, T10E10.4, E01G6.1, cht-3, pqn-74, chil-18, K04H4.2
GO.0030703..eggshell.formation	1	1	NA
GO.0004484..mRNA.guanylyltransferase.activity	1	1	NA
GO.0004651..polynucleotide.5.phosphatase.activity	1	1	NA
GO.0006370..7.methylguanosine.mRNA.capping	0.627474	1	ncbp-2
GO.0010628..positive.regulation.of.gene.expression	0.509962	1	isp-1, hel-1, lin-56, cyd-1, ubl-5
GO.0098507..polynucleotide.5.dephosphorylation	1	1	NA
GO.0001666..response.to.hypoxia	1	1	NA
GO.0042594..response.to.starvation	0.945565	1	unc-70, ZK909.3
GO.0042770..signal.transduction.in.response.to.DNA.damage	1	1	NA
GO.0043068..positive.regulation.of.programmed.cell.death	0.260396	1	egl-1, hlh-2, ces-2
GO.0043021..ribonucleoprotein.complex.binding	0.546122	1	cey-3
GO.0035567..non.canonical.Wnt.signaling.pathway	0.149689	1	cfz-2, sfrp-1
GO.0042813..Wnt.activated.receptor.activity	0.0431476	1	cfz-2, sfrp-1, mom-5
GO.0060070..canonical.Wnt.signaling.pathway	0.0870606	1	cfz-2, sfrp-1, dsh-1, mom-5
GO.0003724..RNA.helicase.activity	1	1	NA
GO.0004004..ATP.dependent.RNA.helicase.activity	0.990691	1	hel-1, F57B9.3, ZK686.2
GO.0004386..helicase.activity	0.999901	1	ruvb-2, hel-1, F57B9.3, ZK686.2
GO.0010501..RNA.secondary.structure.unwinding	0.957484	1	hel-1, F57B9.3, ZK686.2
GO.0016071..mRNA.metabolic.process	0.447014	1	fox-1
GO.0033962..cytoplasmic.mRNA.processing.body.assembly	0.293598	1	lsm-3, lsm-4
GO.0043229..intracellular.organelle	0.498646	1	pgl-3, cup-2
GO.0003746..translation.elongation.factor.activity	0.363445	1	eef-1B.2, iff-2, eef-1B.1, iff-1
GO.0006414..translational.elongation	0.363445	1	eef-1B.2, iff-2, eef-1B.1, iff-1
GO.0004102..choline.O.acetyltransferase.activity	1	1	NA
GO.0008292..acetylcholine.biosynthetic.process	1	1	NA
GO.0060076..excitatory.synapse	1	1	NA
GO.0000118..histone.deacetylase.complex	1	1	NA
GO.0001709..cell.fate.determination	0.627474	1	ham-1
GO.0003678..DNA.helicase.activity	0.923324	1	ruvb-2
GO.0006338..chromatin.remodeling	0.923324	1	cec-7
GO.0016818..hydrolase.activity..acting.on.acid.anhydrides..in.phosphorus.containing.anhydrides	1	1	NA
GO.0032508..DNA.duplex.unwinding	0.996053	1	ruvb-2
GO.0046580..negative.regulation.of.Ras.protein.signal.transduction	0.612531	1	hpl-1, hpl-2
GO.0030992..intraciliary.transport.particle.B	0.906568	1	che-13
GO.0003774..motor.activity	0.8306	1	myo-3, dlc-1, myo-6
GO.0030286..dynein.complex	0.627474	1	dlc-1
GO.0034608..vulval.location	0.275215	1	egl-46, klp-11, nphp-1, kin-3
GO.0051959..dynein.light.intermediate.chain.binding	1	1	NA
GO.0060170..ciliary.membrane	0.447014	1	arl-13
GO.0061066..positive.regulation.of.dauer.larval.development	0.861278	1	daf-6
GO.0005222..intracellular.cAMP.activated.cation.channel.activity	1	1	NA
GO.0005223..intracellular.cGMP.activated.cation.channel.activity	1	1	NA
GO.0005249..voltage.gated.potassium.channel.activity	0.859173	1	slo-1, kqt-1
GO.0030553..cGMP.binding	1	1	NA
GO.0042391..regulation.of.membrane.potential	1	1	NA
GO.0071805..potassium.ion.transmembrane.transport	0.999582	1	twk-11, slo-1, kqt-1
GO.0005921..gap.junction	0.646367	1	inx-3, inx-2, inx-18, inx-6
GO.0006972..hyperosmotic.response	0.976585	1	glr-1
GO.0009408..response.to.heat	0.671955	1	sti-1, hsp-16.2, crt-1, dcs-1, hid-1, ifg-1, jmjc-1, B0261.6
GO.0030991..intraciliary.transport.particle.A	1	1	NA
GO.0035720..intraciliary.anterograde.transport	0.179186	1	che-13
GO.0035869..ciliary.transition.zone	0.068086	1	mksr-1, mksr-2, T26A8.2, nphp-1, mks-5, che-13
GO.0007224..smoothened.signaling.pathway	1	1	NA
GO.0004100..chitin.synthase.activity	1	1	NA
GO.0016758..transferase.activity..transferring.hexosyl.groups	0.985996	1	ugt-32, ugt-9, ugt-2, ugt-15, ugt-24, ugt-31, ugt-26
GO.0033314..mitotic.DNA.replication.checkpoint	0.546122	1	hus-1
GO.0051574..positive.regulation.of.histone.H3.K9.methylation	0.179186	1	chk-2
GO.0000209..protein.polyubiquitination	0.928301	1	C16A11.5, Y52E8A.2, T02C1.1, ubc-7
GO.0030544..Hsp70.protein.binding	0.447014	1	sti-1
GO.0034450..ubiquitin.ubiquitin.ligase.activity	1	1	NA
GO.0045214..sarcomere.organization	0.612531	1	slo-1, mup-2
GO.0051865..protein.autoubiquitination	1	1	NA
GO.0006814..sodium.ion.transport	1	1	NA
GO.0015220..choline.transmembrane.transporter.activity	1	1	NA
GO.0015293..symporter.activity	0.987063	1	snf-11
GO.0015871..choline.transport	1	1	NA
GO.0000272..polysaccharide.catabolic.process	0.0320972	1	cht-1, cht-3
GO.0004553..hydrolase.activity..hydrolyzing.O.glycosyl.compounds	0.817936	1	gana-1, cht-1, cht-3, chil-18, Y105E8B.9
GO.0004568..chitinase.activity	0.15977	1	T05H4.7, C08B6.4, cht-1, lgx-1, cht-3, chil-18
GO.0006032..chitin.catabolic.process	0.15977	1	T05H4.7, C08B6.4, cht-1, lgx-1, cht-3, chil-18
GO.0009620..response.to.fungus	0.179186	1	cht-1
GO.0000307..cyclin.dependent.protein.kinase.holoenzyme.complex	0.365391	1	ccnk-1, cic-1
GO.0016538..cyclin.dependent.protein.serine.threonine.kinase.regulator.activity	0.260396	1	ccnk-1, cyb-1, cic-1
GO.0045737..positive.regulation.of.cyclin.dependent.protein.serine.threonine.kinase.activity	0.293598	1	ccnk-1, cic-1
GO.1901409..positive.regulation.of.phosphorylation.of.RNA.polymerase.II.C.terminal.domain	0.293598	1	ccnk-1, cic-1
GO.0004103..choline.kinase.activity	1	1	NA
GO.0006657..CDP.choline.pathway	1	1	NA
GO.0004305..ethanolamine.kinase.activity	1	1	NA
GO.0006646..phosphatidylethanolamine.biosynthetic.process	0.447014	1	mboa-6
GO.0006656..phosphatidylcholine.biosynthetic.process	0.627474	1	mboa-6
GO.0008654..phospholipid.biosynthetic.process	0.987063	1	mboa-6
GO.0004860..protein.kinase.inhibitor.activity	1	1	NA
GO.0004861..cyclin.dependent.protein.serine.threonine.kinase.inhibitor.activity	1	1	NA
GO.0007050..cell.cycle.arrest	1	1	NA
GO.0032875..regulation.of.DNA.endoreduplication	0.447014	1	cyd-1
GO.0045596..negative.regulation.of.cell.differentiation	1	1	NA
GO.0045605..negative.regulation.of.epidermal.cell.differentiation	1	1	NA
GO.0051302..regulation.of.cell.division	0.558208	1	cyd-1, ostd-1
GO.0071901..negative.regulation.of.protein.serine.threonine.kinase.activity	1	1	NA
GO.1902806..regulation.of.cell.cycle.G1.S.phase.transition	0.546122	1	cyd-1
GO.1904030..negative.regulation.of.cyclin.dependent.protein.kinase.activity	1	1	NA
GO.2000134..negative.regulation.of.G1.S.transition.of.mitotic.cell.cycle	1	1	NA
GO.0004683..calmodulin.dependent.protein.kinase.activity	1	1	NA
GO.0019722..calcium.mediated.signaling	1	1	NA
GO.0032793..positive.regulation.of.CREB.transcription.factor.activity	1	1	NA
GO.0045860..positive.regulation.of.protein.kinase.activity	1	1	NA
GO.0004003..ATP.dependent.DNA.helicase.activity	1	1	NA
GO.0006303..double.strand.break.repair.via.nonhomologous.end.joining	0.293598	1	pot-2, pot-3
GO.0006310..DNA.recombination	0.971465	1	rfs-1
GO.0043564..Ku70.Ku80.complex	1	1	NA
GO.0071480..cellular.response.to.gamma.radiation	1	1	NA
GO.0071481..cellular.response.to.X.ray	1	1	NA
GO.0016817..hydrolase.activity..acting.on.acid.anhydrides	1	1	NA
GO.0005911..cell.cell.junction	0.260396	1	unc-1, ltd-1, csk-1
GO.0090136..epithelial.cell.cell.adhesion	1	1	NA
GO.0005604..basement.membrane	0.687993	1	unc-6, lam-1, spon-1
GO.0031012..extracellular.matrix	0.313756	1	dpy-7, H36L18.1, zmp-1
GO.0050808..synapse.organization	1	1	NA
GO.0005247..voltage.gated.chloride.channel.activity	1	1	NA
GO.1903959..regulation.of.anion.transmembrane.transport	1	1	NA
GO.0010466..negative.regulation.of.peptidase.activity	0.143549	1	R12A1.3, cri-2, T27E4.5, kal-1, ZC84.1
GO.0030414..peptidase.inhibitor.activity	0.143549	1	R12A1.3, cri-2, T27E4.5, kal-1, ZC84.1
GO.0000975..regulatory.region.DNA.binding	1	1	NA
GO.0001933..negative.regulation.of.protein.phosphorylation	0.627474	1	isp-1
GO.0001934..positive.regulation.of.protein.phosphorylation	0.612531	1	isp-1, cyb-1
GO.0006119..oxidative.phosphorylation	1	1	NA
GO.0006744..ubiquinone.biosynthetic.process	0.794046	1	coq-3
GO.0010629..negative.regulation.of.gene.expression	0.859173	1	isp-1, skpo-1
GO.0030534..adult.behavior	1	1	NA
GO.0045333..cellular.respiration	1	1	NA
GO.0048520..positive.regulation.of.behavior	1	1	NA
GO.0051094..positive.regulation.of.developmental.process	1	1	NA
GO.0061063..positive.regulation.of.nematode.larval.development	0.794046	1	isp-1
GO.1904808..positive.regulation.of.protein.oxidation	1	1	NA
GO.2000377..regulation.of.reactive.oxygen.species.metabolic.process	1	1	NA
GO.0009411..response.to.UV	0.937076	1	rad-8
GO.0005765..lysosomal.membrane	0.896758	1	cln-3.3, lmp-1
GO.0007034..vacuolar.transport	0.232444	1	cln-3.3, R12C12.5, vps-32.1, vps-2
GO.0015809..arginine.transport	0.546122	1	cln-3.3
GO.0031301..integral.component.of.organelle.membrane	0.627474	1	cln-3.3
GO.0051453..regulation.of.intracellular.pH	0.923324	1	cln-3.3
GO.0004198..calcium.dependent.cysteine.type.endopeptidase.activity	0.861278	1	W05G11.4
GO.0031430..M.band	0.196943	1	unc-70, slo-1, unc-97, pat-6, spon-1, eva-1, pat-4
GO.0005001..transmembrane.receptor.protein.tyrosine.phosphatase.activity	1	1	NA
GO.0040037..negative.regulation.of.fibroblast.growth.factor.receptor.signaling.pathway	1	1	NA
GO.0016482..cytosolic.transport	1	1	NA
GO.0031134..sister.chromatid.biorientation	1	1	NA
GO.0051306..mitotic.sister.chromatid.separation	0.220716	1	tofu-6, smo-1
GO.0072686..mitotic.spindle	0.313756	1	cmd-1, ZK430.5, tba-1
GO.0031965..nuclear.membrane	0.971465	1	cmd-1
GO.0051296..establishment.of.meiotic.spindle.orientation	0.627474	1	cmd-1
GO.0071944..cell.periphery	0.434146	1	cmd-1, pix-1
GO.0045664..regulation.of.neuron.differentiation	0.365391	1	pag-3, hlh-14
GO.0010754..negative.regulation.of.cGMP.mediated.signaling	1	1	NA
GO.0070482..response.to.oxygen.levels	0.861278	1	rad-8
GO.0048609..multicellular.organismal.reproductive.process	0.694249	1	crt-1
GO.2001235..positive.regulation.of.apoptotic.signaling.pathway	1	1	NA
GO.0055059..asymmetric.neuroblast.division	0.886152	1	ham-1
GO.0060582..cell.fate.determination.involved.in.pattern.specification	1	1	NA
GO.0090630..activation.of.GTPase.activity	1	1	NA
GO.0030246..carbohydrate.binding	0.850919	1	crt-1, clec-7, clec-222, clec-47, clec-229, clec-230, clec-42, ile-2, clec-266, clec-78, clec-180, clec-51, clec-190, clec-196, clec-10, clec-125, clec-140, lec-5, lec-2, clec-97, clec-17, eva-1, clec-157, clec-5
GO.0007368..determination.of.left.right.symmetry	1	1	NA
GO.0070491..repressing.transcription.factor.binding	1	1	NA
GO.0007030..Golgi.organization	0.861278	1	ubxn-2
GO.0017119..Golgi.transport.complex	1	1	NA
GO.0000228..nuclear.chromosome	0.906568	1	sdc-2
GO.0007130..synaptonemal.complex.assembly	1	1	NA
GO.0051177..meiotic.sister.chromatid.cohesion	1	1	NA
GO.0002164..larval.development	0.149689	1	col-10, skr-10
GO.0060107..annuli.extracellular.matrix	0.326275	1	lon-3
GO.0060111..alae.of.collagen.and.cuticulin.based.cuticle.extracellular.matrix	1	1	NA
GO.0006950..response.to.stress	0.0872271	1	pas-6, daf-21, C01G10.8, col-121, icd-1, icd-2
GO.0008299..isoprenoid.biosynthetic.process	0.794046	1	Y48B6A.13
GO.0031314..extrinsic.component.of.mitochondrial.inner.membrane	0.546122	1	coq-3
GO.0002083..4.hydroxybenzoate.decaprenyltransferase.activity	1	1	NA
GO.0004659..prenyltransferase.activity	1	1	NA
GO.0047293..4.hydroxybenzoate.nonaprenyltransferase.activity	1	1	NA
GO.0008168..methyltransferase.activity	0.62431	1	prmt-1, set-12, dot-1.4, F49C12.10, F25H8.1, coq-3, nol-1, B0491.7, T08G11.4, prmt-7, B0285.4, B0361.6, anmt-1, M142.8
GO.0008425..2.polyprenyl.6.methoxy.1.4.benzoquinone.methyltransferase.activity	0.179186	1	coq-3
GO.0008757..S.adenosylmethionine.dependent.methyltransferase.activity	0.232444	1	R08E5.3, F49C12.10, coq-3, nol-1
GO.0016709..oxidoreductase.activity..acting.on.paired.donors..with.incorporation.or.reduction.of.molecular.oxygen..NAD.P.H.as.one.donor..and.incorporation.of.one.atom.of.oxygen	1	1	NA
GO.0044550..secondary.metabolite.biosynthetic.process	0.447014	1	R07B7.4
GO.0000900..translation.repressor.activity..nucleic.acid.binding	1	1	NA
GO.0008135..translation.factor.activity..RNA.binding	1	1	NA
GO.0043022..ribosome.binding	0.0668421	1	eif-3.K, iff-2, eif-6, R02F2.9, iff-1
GO.1990124..messenger.ribonucleoprotein.complex	1	1	NA
GO.2000766..negative.regulation.of.cytoplasmic.translation	1	1	NA
GO.0005847..mRNA.cleavage.and.polyadenylation.specificity.factor.complex	1	1	NA
GO.0016607..nuclear.speck	0.367291	1	syd-9, let-858, rsr-2
GO.0031124..mRNA.3.end.processing	0.627474	1	cids-1
GO.0098789..pre.mRNA.cleavage.required.for.polyadenylation	1	1	NA
GO.0016810..hydrolase.activity..acting.on.carbon.nitrogen..but.not.peptide..bonds	0.420027	1	lgx-1, F48E3.8, unc-33
GO.0019239..deaminase.activity	0.0668421	1	irg-1, T24A6.7, ZK287.7, K07E8.7, Y47D3A.14
GO.0031983..vesicle.lumen	1	1	NA
GO.0042718..yolk.granule	1	1	NA
GO.0030016..myofibril	0.153149	1	myo-3, unc-78, tpi-1, ZC395.10
GO.0000737..DNA.catabolic.process..endonucleolytic	1	1	NA
GO.0004519..endonuclease.activity	0.965226	1	crn-1
GO.0004520..endodeoxyribonuclease.activity	0.749058	1	rfs-1
GO.0004521..endoribonuclease.activity	0.293598	1	ZK1127.5, Y54E10BR.4
GO.0006309..apoptotic.DNA.fragmentation	0.612531	1	crn-2, crn-1
GO.0006401..RNA.catabolic.process	0.794046	1	dcs-1
GO.0060102..collagen.and.cuticulin.based.cuticle.extracellular.matrix	0.0390959	1	lon-3, sqt-3, dpy-13, cpz-1
GO.0045177..apical.part.of.cell	1	1	NA
GO.0001223..transcription.coactivator.binding	1	1	NA
GO.0048256..flap.endonuclease.activity	0.179186	1	crn-1
GO.0004536..deoxyribonuclease.activity	0.546122	1	crn-2
GO.0016888..endodeoxyribonuclease.activity..producing.5.phosphomonoesters	0.546122	1	crn-2
GO.0000178..exosome..RNase.complex.	0.0749515	1	exos-2, exos-4.1, exos-3
GO.0006139..nucleobase.containing.compound.metabolic.process	0.646367	1	tag-231, W04A8.4, let-754, ZK1098.3
GO.0008408..3.5.exonuclease.activity	0.610109	1	W04A8.4, ZK1098.3, mrt-2
GO.0044237..cellular.metabolic.process	0.367291	1	M106.7, Y47H9C.7, ZK1098.4
GO.0000738..DNA.catabolic.process..exonucleolytic	1	1	NA
GO.0003697..single.stranded.DNA.binding	0.753575	1	rpb-7, rfs-1, mtss-1
GO.0004540..ribonuclease.activity	0.293598	1	H35B03.2, smg-5
GO.0090501..RNA.phosphodiester.bond.hydrolysis	0.434146	1	smg-5, F02A9.4
GO.0032077..positive.regulation.of.deoxyribonuclease.activity	1	1	NA
GO.0004531..deoxyribonuclease.II.activity	1	1	NA
GO.0006259..DNA.metabolic.process	1	1	NA
GO.0004817..cysteine.tRNA.ligase.activity	0.179186	1	cars-1
GO.0006418..tRNA.aminoacylation.for.protein.translation	0.738785	1	wars-1, sars-1, cars-1, pars-1
GO.0006423..cysteinyl.tRNA.aminoacylation	0.179186	1	cars-1
GO.0005788..endoplasmic.reticulum.lumen	0.56658	1	crt-1, hsp-3, dnj-27
GO.0031581..hemidesmosome.assembly	0.232444	1	crt-1, pax-3, mec-8, ntl-9
GO.0045471..response.to.ethanol	0.0847962	1	crt-1, jmjc-1
GO.0009650..UV.protection	1	1	NA
GO.0007079..mitotic.chromosome.movement.towards.spindle.pole	0.326275	1	csc-1
GO.0007080..mitotic.metaphase.plate.congression	0.149689	1	csc-1, smo-1
GO.1990385..meiotic.spindle.midzone	0.179186	1	csc-1
GO.1990386..mitotic.cleavage.furrow.ingression	0.179186	1	csc-1
GO.0030536..larval.feeding.behavior	0.179186	1	csk-1
GO.0048747..muscle.fiber.development	0.0320972	1	cst-1, csk-1
GO.0010388..cullin.deneddylation	0.0431476	1	csn-1, csn-4, csn-6
GO.0019784..NEDD8.specific.protease.activity	0.326275	1	csn-4
GO.0000338..protein.deneddylation	0.326275	1	csn-5
GO.0017151..DEAD.H.box.RNA.helicase.binding	0.809423	1	csn-5, smg-5
GO.0031672..A.band	0.365391	1	myo-3, csn-5
GO.0097153..cysteine.type.endopeptidase.activity.involved.in.apoptotic.process	1	1	NA
GO.0042383..sarcolemma	1	1	NA
GO.0055074..calcium.ion.homeostasis	1	1	NA
GO.0009055..electron.carrier.activity	0.82507	1	acdh-9, acdh-2, glrx-10, cyc-1, glrx-21, glrx-5
GO.0022904..respiratory.electron.transport.chain	1	1	NA
GO.0070469..respiratory.chain	0.945565	1	isp-1, D2030.4
GO.0004096..catalase.activity	1	1	NA
GO.0042542..response.to.hydrogen.peroxide	0.694249	1	prdx-2
GO.0007031..peroxisome.organization	1	1	NA
GO.0007266..Rho.protein.signal.transduction	1	1	NA
GO.0004108..citrate..Si..synthase.activity	1	1	NA
GO.0005759..mitochondrial.matrix	0.671955	1	pdhb-1, Y62E10A.6, pdha-1, sod-2, sucl-2, hsp-60, cri-3, F02A9.4
GO.0006101..citrate.metabolic.process	1	1	NA
GO.0046912..transferase.activity..transferring.acyl.groups..acyl.groups.converted.into.alkyl.on.transfer	1	1	NA
GO.0004008..copper.exporting.ATPase.activity	1	1	NA
GO.0005375..copper.ion.transmembrane.transporter.activity	0.861278	1	F31E8.4
GO.0005507..copper.ion.binding	0.948362	1	sco-1
GO.0005774..vacuolar.membrane	0.794046	1	vha-1
GO.0005802..trans.Golgi.network	0.971465	1	rab-14
GO.0006825..copper.ion.transport	0.149689	1	sco-1, cuc-1
GO.0006878..cellular.copper.ion.homeostasis	0.0847962	1	sco-1, cuc-1
GO.0019829..cation.transporting.ATPase.activity	0.794046	1	catp-2
GO.0030001..metal.ion.transport	0.809423	1	F55F8.9, cuc-1
GO.0060003..copper.ion.export	1	1	NA
GO.0015677..copper.ion.import	0.179186	1	cuc-1
GO.0015680..intracellular.copper.ion.transport	0.179186	1	cuc-1
GO.0016530..metallochaperone.activity	0.179186	1	cuc-1
GO.0016531..copper.chaperone.activity	0.326275	1	cuc-1
GO.0008285..negative.regulation.of.cell.proliferation	0.749058	1	skr-2
GO.0010826..negative.regulation.of.centrosome.duplication	0.694249	1	skr-2
GO.0019005..SCF.ubiquitin.ligase.complex	0.149689	1	skr-10, skr-2
GO.0031647..regulation.of.protein.stability	0.498646	1	rpt-4, skr-2
GO.0045930..negative.regulation.of.mitotic.cell.cycle	1	1	NA
GO.0008105..asymmetric.protein.localization	1	1	NA
GO.0019100..male.germ.line.sex.determination	1	1	NA
GO.0019102..male.somatic.sex.determination	1	1	NA
GO.0031461..cullin.RING.ubiquitin.ligase.complex	1	1	NA
GO.0036369..transcription.factor.catabolic.process	1	1	NA
GO.0042078..germ.line.stem.cell.division	0.498646	1	lag-2, let-858
GO.0051232..meiotic.spindle.elongation	1	1	NA
GO.0051759..sister.chromosome.movement.towards.spindle.pole.involved.in.meiotic.sister.chromatid.segregation	0.447014	1	rbx-1
GO.1902104..positive.regulation.of.metaphase.anaphase.transition.of.meiotic.cell.cycle	0.546122	1	rbx-1
GO.0031463..Cul3.RING.ubiquitin.ligase.complex	0.886152	1	rbx-1
GO.0044257..cellular.protein.catabolic.process	0.447014	1	ppt-1
GO.0043161..proteasome.mediated.ubiquitin.dependent.protein.catabolic.process	0.489798	1	ubxn-2, rpn-7, C16A11.5, Y52E8A.2, rpn-5, rpn-12
GO.0031466..Cul5.RING.ubiquitin.ligase.complex	1	1	NA
GO.0051607..defense.response.to.virus	1	1	NA
GO.0006897..endocytosis	0.738785	1	ptr-4, Y110A2AR.3, ptr-18, cup-2
GO.0051788..response.to.misfolded.protein	0.326275	1	cup-2
GO.0097038..perinuclear.endoplasmic.reticulum	0.149689	1	cup-2, glr-1
GO.0030100..regulation.of.endocytosis	1	1	NA
GO.0030659..cytoplasmic.vesicle.membrane	1	1	NA
GO.0005217..intracellular.ligand.gated.ion.channel.activity	1	1	NA
GO.0007041..lysosomal.transport	1	1	NA
GO.0010877..lipid.transport.involved.in.lipid.storage	1	1	NA
GO.0036019..endolysosome	1	1	NA
GO.0045806..negative.regulation.of.endocytosis	1	1	NA
GO.0005578..proteinaceous.extracellular.matrix	0.0742879	1	cri-2, T04F3.2, unc-6, sym-1, slt-1, cwn-1, cbn-1, dma-1, H10E21.4
GO.0030971..receptor.tyrosine.kinase.binding	0.220716	1	cwn-1, dsh-1
GO.0009948..anterior.posterior.axis.specification	1	1	NA
GO.0010084..specification.of.organ.axis.polarity	1	1	NA
GO.0033564..anterior.posterior.axon.guidance	0.627474	1	fmi-1
GO.0060573..cell.fate.specification.involved.in.pattern.specification	1	1	NA
GO.0045859..regulation.of.protein.kinase.activity	0.434146	1	elpc-3, cyb-1
GO.0000070..mitotic.sister.chromatid.segregation	0.91183	1	him-10, cpar-1
GO.0000079..regulation.of.cyclin.dependent.protein.serine.threonine.kinase.activity	0.694249	1	mnat-1
GO.0007098..centrosome.cycle	1	1	NA
GO.0010389..regulation.of.G2.M.transition.of.mitotic.cell.cycle	1	1	NA
GO.0045144..meiotic.sister.chromatid.segregation	1	1	NA
GO.0051383..kinetochore.organization	0.326275	1	him-10
GO.0051445..regulation.of.meiotic.cell.cycle	0.546122	1	skr-2
GO.0007506..gonadal.mesoderm.development	0.661579	1	rsp-2, cyd-1
GO.1904787..positive.regulation.of.asymmetric.protein.localization.involved.in.cell.fate.determination	0.326275	1	cyd-1
GO.0005814..centriole	0.794046	1	C54C6.6
GO.0007088..regulation.of.mitotic.nuclear.division	1	1	NA
GO.0008284..positive.regulation.of.cell.proliferation	0.612531	1	mls-2, lmn-1
GO.0010608..posttranscriptional.regulation.of.gene.expression	1	1	NA
GO.0042023..DNA.endoreduplication	1	1	NA
GO.0048815..hermaphrodite.genitalia.morphogenesis	1	1	NA
GO.1904776..regulation.of.protein.localization.to.cell.cortex	1	1	NA
GO.0005826..actomyosin.contractile.ring	1	1	NA
GO.0016043..cellular.component.organization	1	1	NA
GO.0032154..cleavage.furrow	0.835999	1	dpy-7, syx-4
GO.1902410..mitotic.cytokinetic.process	1	1	NA
GO.1903673..mitotic.cleavage.furrow.formation	1	1	NA
GO.0004843..thiol.dependent.ubiquitin.specific.protease.activity	0.744549	1	ubh-3, ubh-4
GO.0016579..protein.deubiquitination	0.885966	1	ubh-3, ubh-4, usp-14
GO.0036459..thiol.dependent.ubiquitinyl.hydrolase.activity	0.984234	1	usp-14
GO.0097149..centralspindlin.complex	1	1	NA
GO.0000413..protein.peptidyl.prolyl.isomerization	0.0400914	1	cyn-1, cyn-3, cyn-8, cyn-12, fkb-1, cyn-11, fkb-2, cyn-6, Y71H2AM.20
GO.0003755..peptidyl.prolyl.cis.trans.isomerase.activity	0.0400914	1	cyn-1, cyn-3, cyn-8, cyn-12, fkb-1, cyn-11, fkb-2, cyn-6, Y71H2AM.20
GO.0016853..isomerase.activity	0.159084	1	B0024.11, cyn-1, cyn-3, cyn-8, glf-1, cyn-12, fkb-1, F52B11.2, cyn-11, tpi-1, fkb-2, cyn-6, Y71H2AM.20, Y49E10.4
GO.0030198..extracellular.matrix.organization	1	1	NA
GO.0005798..Golgi.associated.vesicle	1	1	NA
GO.0030122..AP.2.adaptor.complex	1	1	NA
GO.0030136..clathrin.coated.vesicle	1	1	NA
GO.0031982..vesicle	1	1	NA
GO.0032050..clathrin.heavy.chain.binding	0.326275	1	clic-1
GO.0004579..dolichyl.diphosphooligosaccharide.protein.glycotransferase.activity	0.149689	1	ostd-1, dad-1
GO.0008250..oligosaccharyltransferase.complex	0.149689	1	ostd-1, dad-1
GO.0004675..transmembrane.receptor.protein.serine.threonine.kinase.activity	0.749058	1	C08G9.1
GO.0004702..receptor.signaling.protein.serine.threonine.kinase.activity	1	1	NA
GO.0005024..transforming.growth.factor.beta.activated.receptor.activity	1	1	NA
GO.0007178..transmembrane.receptor.protein.serine.threonine.kinase.signaling.pathway	0.749058	1	C08G9.1
GO.0007179..transforming.growth.factor.beta.receptor.signaling.pathway	1	1	NA
GO.0023014..signal.transduction.by.protein.phosphorylation	0.980786	1	cst-1
GO.0061067..negative.regulation.of.dauer.larval.development	0.861278	1	daf-25
GO.0005009..insulin.activated.receptor.activity	1	1	NA
GO.0010260..organ.senescence	1	1	NA
GO.0010467..gene.expression	0.722294	1	end-3, lsy-27, lagr-1
GO.0017046..peptide.hormone.binding	1	1	NA
GO.0040034..regulation.of.development..heterochronic	0.835999	1	hbl-1, lin-28
GO.0042169..SH2.domain.binding	1	1	NA
GO.0042992..negative.regulation.of.transcription.factor.import.into.nucleus	1	1	NA
GO.0043054..dauer.exit	0.794046	1	daf-25
GO.0051425..PTB.domain.binding	1	1	NA
GO.1901031..regulation.of.response.to.reactive.oxygen.species	1	1	NA
GO.2000785..regulation.of.autophagosome.assembly	1	1	NA
GO.0001158..enhancer.sequence.specific.DNA.binding	1	1	NA
GO.0022604..regulation.of.cell.morphogenesis	1	1	NA
GO.0030509..BMP.signaling.pathway	1	1	NA
GO.0030513..positive.regulation.of.BMP.signaling.pathway	1	1	NA
GO.0030514..negative.regulation.of.BMP.signaling.pathway	1	1	NA
GO.0036122..BMP.binding	1	1	NA
GO.0046332..SMAD.binding	1	1	NA
GO.0008158..hedgehog.receptor.activity	0.386772	1	ptr-4, daf-6, ptr-18, ptr-10, ptr-9, F43D9.1
GO.0009653..anatomical.structure.morphogenesis	0.232444	1	fkh-3, fkh-4, daf-6, pes-1
GO.0046626..regulation.of.insulin.receptor.signaling.pathway	0.447014	1	daf-6
GO.0005125..cytokine.activity	0.694249	1	unc-129
GO.0005160..transforming.growth.factor.beta.receptor.binding	0.627474	1	unc-129
GO.0008083..growth.factor.activity	0.749058	1	unc-129
GO.0010862..positive.regulation.of.pathway.restricted.SMAD.protein.phosphorylation	0.627474	1	unc-129
GO.0043408..regulation.of.MAPK.cascade	0.830971	1	unc-129
GO.0048468..cell.development	0.705497	1	end-1, end-3
GO.0060395..SMAD.protein.signal.transduction	0.627474	1	unc-129
GO.0043476..pigment.accumulation	1	1	NA
GO.0007267..cell.cell.signaling	0.434146	1	wrt-8, wrt-1
GO.0008202..steroid.metabolic.process	1	1	NA
GO.0008203..cholesterol.metabolic.process	0.794046	1	mboa-1
GO.0008395..steroid.hydroxylase.activity	1	1	NA
GO.0047749..cholestanetriol.26.monooxygenase.activity	1	1	NA
GO.0007168..receptor.guanylyl.cyclase.signaling.pathway	1	1	NA
GO.0007608..sensory.perception.of.smell	0.0749515	1	odr-2, odr-4, unc-86
GO.0008074..guanylate.cyclase.complex..soluble	0.984234	1	gcy-22
GO.0019236..response.to.pheromone	1	1	NA
GO.0019932..second.messenger.mediated.signaling	0.447014	1	gcy-22
GO.0030511..positive.regulation.of.transforming.growth.factor.beta.receptor.signaling.pathway	1	1	NA
GO.0004879..RNA.polymerase.II.transcription.factor.activity..ligand.activated.sequence.specific.DNA.binding	0.794046	1	nhr-25
GO.0043401..steroid.hormone.mediated.signaling.pathway	0.999972	1	nhr-270, nhr-158, nhr-161, nhr-50, nhr-218, nhr-127, nhr-120, nhr-137, sex-1, nhr-17, nhr-25, nhr-274, nhr-236, nhr-2, nhr-113
GO.0031931..TORC1.complex	1	1	NA
GO.0002821..positive.regulation.of.adaptive.immune.response	1	1	NA
GO.0010564..regulation.of.cell.cycle.process	1	1	NA
GO.0033613..activating.transcription.factor.binding	1	1	NA
GO.0034605..cellular.response.to.heat	1	1	NA
GO.0040008..regulation.of.growth	0.0847962	1	rsp-2, rsp-1
GO.0040015..negative.regulation.of.multicellular.organism.growth	0.794046	1	lon-3
GO.0043620..regulation.of.DNA.templated.transcription.in.response.to.stress	1	1	NA
GO.0046890..regulation.of.lipid.biosynthetic.process	1	1	NA
GO.0060537..muscle.tissue.development	1	1	NA
GO.1900426..positive.regulation.of.defense.response.to.bacterium	1	1	NA
GO.1990381..ubiquitin.specific.protease.binding	1	1	NA
GO.0000978..RNA.polymerase.II.core.promoter.proximal.region.sequence.specific.DNA.binding	0.661579	1	zip-11, hlh-2
GO.1902855..regulation.of.nonmotile.primary.cilium.assembly	1	1	NA
GO.0006611..protein.export.from.nucleus	0.220716	1	daf-21, par-5
GO.0061077..chaperone.mediated.protein.folding	0.159127	1	daf-21, fkb-1, fkb-2
GO.0006970..response.to.osmotic.stress	0.260396	1	osm-8, daf-25, jmjc-1
GO.0010753..positive.regulation.of.cGMP.mediated.signaling	0.447014	1	daf-25
GO.0097499..protein.localization.to.nonmotile.primary.cilium	0.365391	1	daf-25, odr-4
GO.0005158..insulin.receptor.binding	1	1	NA
GO.0005179..hormone.activity	0.145966	1	ins-8, ins-7, ins-19, ins-12, ins-11, ins-2, ins-20
GO.0042990..regulation.of.transcription.factor.import.into.nucleus	1	1	NA
GO.0004596..peptide.alpha.N.acetyltransferase.activity	0.627474	1	Y97E10AL.3
GO.0006474..N.terminal.protein.amino.acid.acetylation	1	1	NA
GO.0006475..internal.protein.amino.acid.acetylation	1	1	NA
GO.0017198..N.terminal.peptidyl.serine.acetylation	1	1	NA
GO.0018002..N.terminal.peptidyl.glutamic.acid.acetylation	1	1	NA
GO.0031415..NatA.complex	1	1	NA
GO.0032504..multicellular.organism.reproduction	0.232444	1	F15H10.7, F10C2.3, T07G12.3, rad-8
GO.0051091..positive.regulation.of.sequence.specific.DNA.binding.transcription.factor.activity	1	1	NA
GO.1990189..peptide.serine.N.acetyltransferase.activity	1	1	NA
GO.1990190..peptide.glutamate.N.acetyltransferase.activity	1	1	NA
GO.0004488..methylenetetrahydrofolate.dehydrogenase..NADP...activity	1	1	NA
GO.0009396..folic.acid.containing.compound.biosynthetic.process	1	1	NA
GO.0009303..rRNA.transcription	0.326275	1	dao-5
GO.0005761..mitochondrial.ribosome	0.159127	1	CD4.3, mrpl-51, mrpl-20
GO.0005254..chloride.channel.activity	0.905445	1	lgc-54, lgc-47, best-13, best-1, exc-4
GO.0005275..amine.transmembrane.transporter.activity	0.749058	1	C44C10.3
GO.0005328..neurotransmitter.sodium.symporter.activity	0.861278	1	snf-11
GO.0005329..dopamine.transmembrane.transporter.activity	1	1	NA
GO.0005330..dopamine.sodium.symporter.activity	1	1	NA
GO.0006836..neurotransmitter.transport	0.945565	1	snf-11, syx-4
GO.0015837..amine.transport	0.749058	1	C44C10.3
GO.0030673..axolemma	1	1	NA
GO.0032590..dendrite.membrane	0.694249	1	dex-1
GO.0042734..presynaptic.membrane	1	1	NA
GO.0051583..dopamine.uptake.involved.in.synaptic.transmission	1	1	NA
GO.0090494..dopamine.uptake	1	1	NA
GO.0045793..positive.regulation.of.cell.size	1	1	NA
GO.0046622..positive.regulation.of.organ.growth	1	1	NA
GO.0070700..BMP.receptor.binding	1	1	NA
GO.0000375..RNA.splicing..via.transesterification.reactions	1	1	NA
GO.0008419..RNA.lariat.debranching.enzyme.activity	1	1	NA
GO.0016788..hydrolase.activity..acting.on.ester.bonds	0.811646	1	pqn-68, M60.2, F09C8.1, lipl-7
GO.0006306..DNA.methylation	1	1	NA
GO.0016581..NuRD.complex	1	1	NA
GO.0004525..ribonuclease.III.activity	0.447014	1	F02A9.4
GO.0004530..deoxyribonuclease.I.activity	1	1	NA
GO.0016442..RISC.complex	1	1	NA
GO.0016891..endoribonuclease.activity..producing.5.phosphomonoesters	1	1	NA
GO.0030422..production.of.siRNA.involved.in.RNA.interference	0.794046	1	rde-4
GO.0031050..dsRNA.fragmentation	1	1	NA
GO.0031054..pre.miRNA.processing	0.546122	1	lin-28
GO.2000636..positive.regulation.of.primary.miRNA.processing	1	1	NA
GO.0000288..nuclear.transcribed.mRNA.catabolic.process..deadenylation.dependent.decay	0.114116	1	dcs-1, ntl-2, ntl-3
GO.0000290..deadenylation.dependent.decapping.of.nuclear.transcribed.mRNA	0.627474	1	dcs-1
GO.0004780..sulfate.adenylyltransferase..ADP..activity	0.179186	1	dcs-1
GO.0006402..mRNA.catabolic.process	0.114116	1	dcs-1, ntl-9, disl-2
GO.0006790..sulfur.compound.metabolic.process	0.447014	1	dcs-1
GO.0009150..purine.ribonucleotide.metabolic.process	0.179186	1	dcs-1
GO.0047627..adenylylsulfatase.activity	0.179186	1	dcs-1
GO.0050072..m7G.5.pppN.diphosphatase.activity	0.447014	1	dcs-1
GO.0007016..cytoskeletal.anchoring.at.plasma.membrane	0.627474	1	dgn-1
GO.0005272..sodium.channel.activity	1	1	NA
GO.0010447..response.to.acidic.pH	1	1	NA
GO.0035725..sodium.ion.transmembrane.transport	0.997481	1	pitr-4, ncx-3
GO.0043200..response.to.amino.acid	1	1	NA
GO.0043067..regulation.of.programmed.cell.death	1	1	NA
GO.0004143..diacylglycerol.kinase.activity	1	1	NA
GO.0007205..protein.kinase.C.activating.G.protein.coupled.receptor.signaling.pathway	1	1	NA
GO.0007210..serotonin.receptor.signaling.pathway	1	1	NA
GO.0007212..dopamine.receptor.signaling.pathway	1	1	NA
GO.0044297..cell.body	0.861278	1	stn-2
GO.0046834..lipid.phosphorylation	1	1	NA
GO.0043052..thermotaxis	1	1	NA
GO.0048169..regulation.of.long.term.neuronal.synaptic.plasticity	1	1	NA
GO.0009925..basal.plasma.membrane	0.114116	1	unc-97, dgn-1, pat-4
GO.0016010..dystrophin.associated.glycoprotein.complex	0.627474	1	dgn-1
GO.0043236..laminin.binding	0.0847962	1	dgn-1, agr-1
GO.0008090..retrograde.axonal.transport	0.447014	1	lis-1
GO.0016322..neuron.remodeling	1	1	NA
GO.0035047..centrosomal.and.pronuclear.rotation	1	1	NA
GO.0048814..regulation.of.dendrite.morphogenesis	1	1	NA
GO.0051293..establishment.of.spindle.localization	1	1	NA
GO.1902473..regulation.of.protein.localization.to.synapse	1	1	NA
GO.1990048..anterograde.dense.core.granule.transport	1	1	NA
GO.0004157..dihydropyrimidinase.activity	1	1	NA
GO.0006208..pyrimidine.nucleobase.catabolic.process	1	1	NA
GO.0016812..hydrolase.activity..acting.on.carbon.nitrogen..but.not.peptide..bonds..in.cyclic.amides	1	1	NA
GO.0046113..nucleobase.catabolic.process	1	1	NA
GO.0005811..lipid.particle	0.434146	1	his-66, F26A3.1
GO.0033555..multicellular.organismal.response.to.stress	1	1	NA
GO.0016229..steroid.dehydrogenase.activity	1	1	NA
GO.0004090..carbonyl.reductase..NADPH..activity	1	1	NA
GO.0005997..xylulose.metabolic.process	1	1	NA
GO.0005998..xylulose.catabolic.process	1	1	NA
GO.0006006..glucose.metabolic.process	0.830971	1	gpd-4
GO.0042732..D.xylose.metabolic.process	1	1	NA
GO.0050038..L.xylulose.reductase..NADP...activity	1	1	NA
GO.0051289..protein.homotetramerization	1	1	NA
GO.0000038..very.long.chain.fatty.acid.metabolic.process	1	1	NA
GO.0006637..acyl.CoA.metabolic.process	1	1	NA
GO.0010888..negative.regulation.of.lipid.storage	1	1	NA
GO.0042811..pheromone.biosynthetic.process	1	1	NA
GO.0048639..positive.regulation.of.developmental.growth	1	1	NA
GO.1904070..ascaroside.biosynthetic.process	1	1	NA
GO.0006839..mitochondrial.transport	1	1	NA
GO.0000175..3.5.exoribonuclease.activity	0.220716	1	C08B6.8, disl-2
GO.0006364..rRNA.processing	0.275801	1	Y66H1A.4, F52C12.2, C25G4.3, exos-4.1, nol-1, Y54E5B.2, sbds-1, C34E10.10, disl-2, Y48A6B.3, frg-1
GO.0003887..DNA.directed.DNA.polymerase.activity	1	1	NA
GO.0005658..alpha.DNA.polymerase.primase.complex	1	1	NA
GO.0071897..DNA.biosynthetic.process	0.906568	1	thk-1
GO.0005875..microtubule.associated.complex	0.293598	1	dlc-1, lis-1
GO.0004385..guanylate.kinase.activity	0.447014	1	dlg-1
GO.0008328..ionotropic.glutamate.receptor.complex	0.220716	1	dlg-1, glr-1
GO.0035255..ionotropic.glutamate.receptor.binding	0.447014	1	dlg-1
GO.0043113..receptor.clustering	0.220716	1	dlg-1, agr-1
GO.0045186..zonula.adherens.assembly	0.179186	1	dlg-1
GO.0045197..establishment.or.maintenance.of.epithelial.cell.apical.basal.polarity	0.749058	1	dlg-1
GO.0046037..GMP.metabolic.process	0.447014	1	dlg-1
GO.0046710..GDP.metabolic.process	0.627474	1	dlg-1
GO.0005868..cytoplasmic.dynein.complex	1	1	NA
GO.0035371..microtubule.plus.end	1	1	NA
GO.0000186..activation.of.MAPKK.activity	1	1	NA
GO.0004709..MAP.kinase.kinase.kinase.activity	1	1	NA
GO.0048677..axon.extension.involved.in.regeneration	1	1	NA
GO.0048689..formation.of.growth.cone.in.injured.axon	1	1	NA
GO.1903616..MAPK.cascade.involved.in.axon.regeneration	1	1	NA
GO.0000014..single.stranded.DNA.endodeoxyribonuclease.activity	1	1	NA
GO.0043141..ATP.dependent.5.3.DNA.helicase.activity	0.546122	1	ruvb-2
GO.0043142..single.stranded.DNA.dependent.ATPase.activity	1	1	NA
GO.0007097..nuclear.migration	1	1	NA
GO.0010970..establishment.of.localization.by.movement.along.microtubule	1	1	NA
GO.0045502..dynein.binding	0.326275	1	lis-1
GO.0045505..dynein.intermediate.chain.binding	1	1	NA
GO.0000242..pericentriolar.material	1	1	NA
GO.0006469..negative.regulation.of.protein.kinase.activity	1	1	NA
GO.0051787..misfolded.protein.binding	1	1	NA
GO.0045454..cell.redox.homeostasis	0.16638	1	C06A6.5, tpi-1, glrx-10, txl-1, M04D5.1, dnj-27, gsr-1, glrx-21, glrx-5, Y49E10.4
GO.0031072..heat.shock.protein.binding	0.434146	1	K07E8.6, hsp-12.2
GO.0007269..neurotransmitter.secretion	1	1	NA
GO.0016226..iron.sulfur.cluster.assembly	1	1	NA
GO.0051259..protein.oligomerization	1	1	NA
GO.0015036..disulfide.oxidoreductase.activity	0.179186	1	dnj-27
GO.0034975..protein.folding.in.endoplasmic.reticulum	0.220716	1	emc-6, dnj-27
GO.0008026..ATP.dependent.helicase.activity	1	1	NA
GO.0043570..maintenance.of.DNA.repeat.elements	1	1	NA
GO.0090329..regulation.of.DNA.dependent.DNA.replication	1	1	NA
GO.0009794..regulation.of.mitotic.cell.cycle..embryonic	1	1	NA
GO.0001588..dopamine.neurotransmitter.receptor.activity..coupled.via.Gs	1	1	NA
GO.0001963..synaptic.transmission..dopaminergic	1	1	NA
GO.0007191..adenylate.cyclase.activating.dopamine.receptor.signaling.pathway	1	1	NA
GO.0035240..dopamine.binding	1	1	NA
GO.0051379..epinephrine.binding	1	1	NA
GO.0051380..norepinephrine.binding	1	1	NA
GO.0001591..dopamine.neurotransmitter.receptor.activity..coupled.via.Gi.Go	1	1	NA
GO.0060108..annular.furrow.extracellular.matrix	0.179186	1	dpy-7
GO.0003756..protein.disulfide.isomerase.activity	0.650602	1	C06A6.5, M04D5.1, Y49E10.4
GO.0015035..protein.disulfide.oxidoreductase.activity	0.363445	1	glrx-10, txl-1, glrx-21, glrx-5
GO.0034976..response.to.endoplasmic.reticulum.stress	0.56658	1	C06A6.5, M04D5.1, Y49E10.4
GO.0004656..procollagen.proline.4.dioxygenase.activity	1	1	NA
GO.0016702..oxidoreductase.activity..acting.on.single.donors.with.incorporation.of.molecular.oxygen..incorporation.of.two.atoms.of.oxygen	1	1	NA
GO.0019511..peptidyl.proline.hydroxylation	0.627474	1	M04D5.1
GO.0031418..L.ascorbic.acid.binding	1	1	NA
GO.0031545..peptidyl.proline.4.dioxygenase.activity	0.694249	1	M04D5.1
GO.0043412..macromolecule.modification	1	1	NA
GO.0051213..dioxygenase.activity	0.924818	1	gbh-1, jmjc-1
GO.0000030..mannosyltransferase.activity	0.627474	1	T27F7.4
GO.0005637..nuclear.inner.membrane	0.293598	1	emr-1, lmn-1
GO.0018406..protein.C.linked.glycosylation.via.2.alpha.mannosyl.L.tryptophan	1	1	NA
GO.0000805..X.chromosome	1	1	NA
GO.0001104..RNA.polymerase.II.transcription.cofactor.activity	1	1	NA
GO.0016592..mediator.complex	1	1	NA
GO.0005905..coated.pit	1	1	NA
GO.0061357..positive.regulation.of.Wnt.protein.secretion	1	1	NA
GO.1990075..periciliary.membrane.compartment	0.694249	1	clic-1
GO.0046536..dosage.compensation.complex	1	1	NA
GO.0000799..nuclear.condensin.complex	1	1	NA
GO.0010032..meiotic.chromosome.condensation	1	1	NA
GO.0045128..negative.regulation.of.reciprocal.meiotic.recombination	1	1	NA
GO.0051304..chromosome.separation	1	1	NA
GO.0006348..chromatin.silencing.at.telomere	0.447014	1	dpy-30
GO.0042800..histone.methyltransferase.activity..H3.K4.specific.	0.434146	1	dpy-30, set-30
GO.0048188..Set1C.COMPASS.complex	0.447014	1	dpy-30
GO.0051568..histone.H3.K4.methylation	0.208396	1	dpy-30, set-30, wdr-5.1
GO.0000151..ubiquitin.ligase.complex	0.965226	1	BE0003N10.3
GO.0008078..mesodermal.cell.migration	0.0870606	1	vab-8, unc-39, unc-6, mig-2
GO.0000266..mitochondrial.fission	1	1	NA
GO.0008637..apoptotic.mitochondrial.changes	0.447014	1	egl-1
GO.0004815..aspartate.tRNA.ligase.activity	1	1	NA
GO.0006422..aspartyl.tRNA.aminoacylation	1	1	NA
GO.2000748..positive.regulation.of.defecation.rhythm	1	1	NA
GO.0060069..Wnt.signaling.pathway..regulating.spindle.positioning	0.434146	1	dsh-1, mom-5
GO.0060071..Wnt.signaling.pathway..planar.cell.polarity.pathway	0.149689	1	vang-1, dsh-1
GO.0048546..digestive.tract.morphogenesis	0.447014	1	vang-1
GO.0005277..acetylcholine.transmembrane.transporter.activity	1	1	NA
GO.0007529..establishment.of.synaptic.specificity.at.neuromuscular.junction	1	1	NA
GO.0007626..locomotory.behavior	0.976585	1	myo-3
GO.0015870..acetylcholine.transport	1	1	NA
GO.0016014..dystrobrevin.complex	1	1	NA
GO.0032224..positive.regulation.of.synaptic.transmission..cholinergic	0.694249	1	ric-3
GO.0046716..muscle.cell.cellular.homeostasis	0.627474	1	unc-70
GO.0008307..structural.constituent.of.muscle	1	1	NA
GO.0030235..nitric.oxide.synthase.regulator.activity	1	1	NA
GO.0005879..axonemal.microtubule	0.326275	1	tbb-4
GO.0018095..protein.polyglutamylation	1	1	NA
GO.0060271..cilium.morphogenesis	0.208396	1	mksr-1, mksr-2, arl-13
GO.0000165..MAPK.cascade	1	1	NA
GO.0004707..MAP.kinase.activity	1	1	NA
GO.0003391..amphid.sensory.organ.dendrite.retrograde.extension	0.326275	1	dex-1
GO.0043621..protein.self.association	0.744549	1	snx-1, sepa-1
GO.0006461..protein.complex.assembly	1	1	NA
GO.0055088..lipid.homeostasis	0.91183	1	acdh-9, acdh-2
GO.0031143..pseudopodium	1	1	NA
GO.0090386..phagosome.maturation.involved.in.apoptotic.cell.clearance	0.830971	1	snx-1
GO.0043056..forward.locomotion	0.447014	1	glr-1
GO.0045203..integral.component.of.cell.outer.membrane	1	1	NA
GO.0060378..regulation.of.brood.size	1	1	NA
GO.0000303..response.to.superoxide	0.498646	1	rad-8, gsr-1
GO.0008053..mitochondrial.fusion	1	1	NA
GO.0035264..multicellular.organism.growth	1	1	NA
GO.0006820..anion.transport	0.983841	1	T22F3.11, F47B8.10, M162.5, T11G6.2
GO.0008344..adult.locomotory.behavior	0.293598	1	rab-6.2, glr-1
GO.0022857..transmembrane.transporter.activity	0.999902	1	T22F3.11, F47B8.10, M162.5, C44C10.3, T11G6.2
GO.0030672..synaptic.vesicle.membrane	1	1	NA
GO.0061096..negative.regulation.of.turning.behavior.involved.in.mating	1	1	NA
GO.0005243..gap.junction.channel.activity	0.56658	1	inx-3, inx-2, inx-6
GO.0055077..gap.junction.hemi.channel.activity	0.520178	1	inx-3, inx-2, inx-6
GO.0005391..sodium.potassium.exchanging.ATPase.activity	1	1	NA
GO.0006813..potassium.ion.transport	0.995732	1	slo-1, kqt-1
GO.0006883..cellular.sodium.ion.homeostasis	1	1	NA
GO.0006937..regulation.of.muscle.contraction	0.661579	1	tnt-4, mup-2
GO.0010107..potassium.ion.import	1	1	NA
GO.0010248..establishment.or.maintenance.of.transmembrane.electrochemical.gradient	1	1	NA
GO.0030007..cellular.potassium.ion.homeostasis	1	1	NA
GO.0036376..sodium.ion.export.from.cell	1	1	NA
GO.0005834..heterotrimeric.G.protein.complex	1	1	NA
GO.0008277..regulation.of.G.protein.coupled.receptor.protein.signaling.pathway	1	1	NA
GO.0030845..phospholipase.C.inhibiting.G.protein.coupled.receptor.signaling.pathway	1	1	NA
GO.0043087..regulation.of.GTPase.activity	0.558208	1	swan-1, plx-2
GO.0050804..modulation.of.synaptic.transmission	0.326275	1	slo-1
GO.0022834..ligand.gated.channel.activity	1	1	NA
GO.0045161..neuronal.ion.channel.clustering	1	1	NA
GO.0004084..branched.chain.amino.acid.transaminase.activity	1	1	NA
GO.0008483..transaminase.activity	0.937076	1	got-1.2
GO.0008652..cellular.amino.acid.biosynthetic.process	0.957625	1	F55G1.9
GO.0009081..branched.chain.amino.acid.metabolic.process	1	1	NA
GO.0009082..branched.chain.amino.acid.biosynthetic.process	1	1	NA
GO.0052654..L.leucine.transaminase.activity	1	1	NA
GO.0052655..L.valine.transaminase.activity	1	1	NA
GO.0052656..L.isoleucine.transaminase.activity	1	1	NA
GO.0003857..3.hydroxyacyl.CoA.dehydrogenase.activity	1	1	NA
GO.0004300..enoyl.CoA.hydratase.activity	1	1	NA
GO.0006635..fatty.acid.beta.oxidation	1	1	NA
GO.0016507..mitochondrial.fatty.acid.beta.oxidation.multienzyme.complex	1	1	NA
GO.0000768..syncytium.formation.by.plasma.membrane.fusion	0.326275	1	eff-1
GO.0044291..cell.cell.contact.zone	0.179186	1	eff-1
GO.0090597..nematode.male.tail.mating.organ.morphogenesis	0.326275	1	eff-1
GO.0004686..elongation.factor.2.kinase.activity	1	1	NA
GO.0048557..embryonic.digestive.tract.morphogenesis	0.861278	1	lin-53
GO.0046875..ephrin.receptor.binding	0.149689	1	efn-4, vab-2
GO.0048013..ephrin.receptor.signaling.pathway	0.220716	1	efn-4, vab-2
GO.0060280..negative.regulation.of.ovulation	0.326275	1	egrh-1
GO.0031225..anchored.component.of.membrane	0.326275	1	efn-4
GO.0042074..cell.migration.involved.in.gastrulation	0.694249	1	efn-4
GO.0032091..negative.regulation.of.protein.binding	0.179186	1	egl-1
GO.0005267..potassium.channel.activity	0.994206	1	twk-11, slo-1, kqt-1
GO.0006936..muscle.contraction	0.809423	1	tnt-4, tni-1
GO.0031528..microvillus.membrane	0.447014	1	arl-13
GO.0030070..insulin.processing	1	1	NA
GO.0090325..regulation.of.locomotion.involved.in.locomotory.behavior	0.749058	1	uev-1
GO.0004692..cGMP.dependent.protein.kinase.activity	1	1	NA
GO.0030308..negative.regulation.of.cell.growth	1	1	NA
GO.0046621..negative.regulation.of.organ.growth	1	1	NA
GO.0051343..positive.regulation.of.cyclic.nucleotide.phosphodiesterase.activity	1	1	NA
GO.1902160..negative.regulation.of.cyclic.nucleotide.gated.ion.channel.activity	1	1	NA
GO.0004435..phosphatidylinositol.phospholipase.C.activity	1	1	NA
GO.0007320..insemination	1	1	NA
GO.0016042..lipid.catabolic.process	0.995189	1	lipl-7
GO.0034609..spicule.insertion	1	1	NA
GO.0018401..peptidyl.proline.hydroxylation.to.4.hydroxy.L.proline	1	1	NA
GO.0007622..rhythmic.behavior	1	1	NA
GO.0009968..negative.regulation.of.signal.transduction	0.558208	1	rgs-9, rgs-11
GO.0048664..neuron.fate.determination	1	1	NA
GO.0005104..fibroblast.growth.factor.receptor.binding	1	1	NA
GO.0008543..fibroblast.growth.factor.receptor.signaling.pathway	1	1	NA
GO.0061025..membrane.fusion	0.313756	1	memb-2, memb-1, ubxn-2
GO.0035545..determination.of.left.right.asymmetry.in.nervous.system	0.861278	1	nsy-7
GO.0004180..carboxypeptidase.activity	0.976585	1	T06A4.1
GO.0004181..metallocarboxypeptidase.activity	0.948362	1	T06A4.1
GO.0004185..serine.type.carboxypeptidase.activity	1	1	NA
GO.0006518..peptide.metabolic.process	1	1	NA
GO.0014055..acetylcholine.secretion..neurotransmission	1	1	NA
GO.0022841..potassium.ion.leak.channel.activity	0.99919	1	twk-11
GO.0030322..stabilization.of.membrane.potential	0.99919	1	twk-11
GO.0001664..G.protein.coupled.receptor.binding	0.753575	1	spp-13, spp-10, K02A11.4
GO.0019001..guanyl.nucleotide.binding	1	1	NA
GO.0031683..G.protein.beta.gamma.subunit.complex.binding	1	1	NA
GO.0060158..phospholipase.C.activating.dopamine.receptor.signaling.pathway	1	1	NA
GO.1902474..positive.regulation.of.protein.localization.to.synapse	1	1	NA
GO.0005251..delayed.rectifier.potassium.channel.activity	0.923324	1	kqt-1
GO.0008076..voltage.gated.potassium.channel.complex	0.809423	1	slo-1, kqt-1
GO.0051260..protein.homooligomerization	0.563468	1	T05E12.3, inso-1, spp-3, fbxb-52, C40A11.4, C40A11.6, B0281.5
GO.0060065..uterus.development	0.326275	1	egl-38
GO.0031536..positive.regulation.of.exit.from.mitosis	0.326275	1	egl-46
GO.0035329..hippo.signaling	0.447014	1	sav-1
GO.0048675..axon.extension	0.0965455	1	madd-2, egl-46, unc-6, vab-3, mig-2, slt-1, unc-33, tba-1, kal-1, unc-86
GO.0045182..translation.regulator.activity	1	1	NA
GO.0055057..neuroblast.division	0.179186	1	egl-46
GO.0050909..sensory.perception.of.taste	1	1	NA
GO.0001172..transcription..RNA.templated	0.627474	1	elpc-1
GO.0003968..RNA.directed.RNA.polymerase.activity	0.627474	1	elpc-1
GO.0031081..nuclear.pore.distribution	0.326275	1	lmn-1
GO.0070090..metaphase.plate	1	1	NA
GO.0043162..ubiquitin.dependent.protein.catabolic.process.via.the.multivesicular.body.sorting.pathway	1	1	NA
GO.1903361..protein.localization.to.basolateral.plasma.membrane	0.749058	1	C11H1.3
GO.0048488..synaptic.vesicle.endocytosis	1	1	NA
GO.0031369..translation.initiation.factor.binding	0.159127	1	eif-3.F, rpb-7, eif-3.C
GO.0071541..eukaryotic.translation.initiation.factor.3.complex..eIF3m	0.179186	1	eif-3.F
GO.0042254..ribosome.biogenesis	0.147037	1	Y66H1A.4, F52C12.2, F25H8.2, ZK1127.5, F10E7.5, C43E11.9, eif-6, sbds-1, Y48A6B.3, frg-1
GO.0042256..mature.ribosome.assembly	0.0847962	1	eif-6, sbds-1
GO.0042273..ribosomal.large.subunit.biogenesis	0.118105	1	rpl-26, rpl-14, eif-6, C16A3.4
GO.0043023..ribosomal.large.subunit.binding	0.546122	1	eif-6
GO.0006368..transcription.elongation.from.RNA.polymerase.II.promoter	0.0870606	1	elpc-3, T01C3.2, tag-343, elb-1
GO.0030891..VCB.complex	0.326275	1	elb-1
GO.0031462..Cul2.RING.ubiquitin.ligase.complex	0.498646	1	rbx-1, elb-1
GO.0070449..elongin.complex	0.326275	1	elb-1
GO.0032968..positive.regulation.of.transcription.elongation.from.RNA.polymerase.II.promoter	1	1	NA
GO.0006636..unsaturated.fatty.acid.biosynthetic.process	1	1	NA
GO.0001162..RNA.polymerase.II.intronic.transcription.regulatory.region.sequence.specific.DNA.binding	1	1	NA
GO.0007507..heart.development	0.365391	1	end-1, end-3
GO.0009887..organ.morphogenesis	0.705497	1	end-1, end-3
GO.0048565..digestive.tract.development	0.434146	1	end-1, end-3
GO.0048646..anatomical.structure.formation.involved.in.morphogenesis	1	1	NA
GO.0003705..transcription.factor.activity..RNA.polymerase.II.distal.enhancer.sequence.specific.binding	0.794046	1	tbx-9
GO.0007586..digestion	1	1	NA
GO.0030856..regulation.of.epithelial.cell.differentiation	1	1	NA
GO.1902097..positive.regulation.of.transcription.from.RNA.polymerase.II.promoter.involved.in.defense.response.to.Gram.negative.bacterium	1	1	NA
GO.0000983..transcription.factor.activity..RNA.polymerase.II.core.promoter.sequence.specific	1	1	NA
GO.0061404..positive.regulation.of.transcription.from.RNA.polymerase.II.promoter.in.response.to.increased.salt	1	1	NA
GO.1901244..positive.regulation.of.transcription.from.RNA.polymerase.II.promoter.involved.in.defense.response.to.fungus	1	1	NA
GO.0032784..regulation.of.DNA.templated.transcription..elongation	0.447014	1	T24H10.1
GO.0003958..NADPH.hemoprotein.reductase.activity	1	1	NA
GO.0010181..FMN.binding	0.948362	1	Y32H12A.6
GO.0030586...methionine.synthase..reductase.activity	1	1	NA
GO.0005201..extracellular.matrix.structural.constituent	1	1	NA
GO.0050714..positive.regulation.of.protein.secretion	1	1	NA
GO.0007091..metaphase.anaphase.transition.of.mitotic.cell.cycle	1	1	NA
GO.0030071..regulation.of.mitotic.metaphase.anaphase.transition	0.326275	1	mat-3
GO.0031145..anaphase.promoting.complex.dependent.catabolic.process	1	1	NA
GO.0001555..oocyte.growth	0.326275	1	emo-1
GO.0006605..protein.targeting	0.0847962	1	emo-1, tomm-20
GO.0015450..P.P.bond.hydrolysis.driven.protein.transmembrane.transporter.activity	0.220716	1	emo-1, tomm-20
GO.0071806..protein.transmembrane.transport	0.179186	1	emo-1
GO.0005521..lamin.binding	0.447014	1	emr-1
GO.0005639..integral.component.of.nuclear.inner.membrane	0.447014	1	emr-1
GO.0007493..endodermal.cell.fate.determination	0.326275	1	end-1
GO.0005337..nucleoside.transmembrane.transporter.activity	1	1	NA
GO.1901642..nucleoside.transmembrane.transport	0.830971	1	slc-28.1
GO.0051402..neuron.apoptotic.process	0.326275	1	eor-2
GO.0007231..osmosensory.signaling.pathway	1	1	NA
GO.0005034..osmosensor.activity	1	1	NA
GO.0007414..axonal.defasciculation	1	1	NA
GO.0010950..positive.regulation.of.endopeptidase.activity	1	1	NA
GO.0071711..basement.membrane.organization	1	1	NA
GO.0032009..early.phagosome	0.546122	1	snx-1
GO.0005903..brush.border	1	1	NA
GO.0030056..hemidesmosome	0.906568	1	pix-1
GO.0045109..intermediate.filament.organization	1	1	NA
GO.0045185..maintenance.of.protein.location	1	1	NA
GO.0048730..epidermis.morphogenesis	0.159127	1	sdn-1, vab-2, kal-1
GO.0051017..actin.filament.bundle.assembly	0.627474	1	frg-1
GO.0006621..protein.retention.in.ER.lumen	0.326275	1	C28H8.4
GO.0046923..ER.retention.sequence.binding	0.326275	1	C28H8.4
GO.0000467..exonucleolytic.trimming.to.generate.mature.3.end.of.5.8S.rRNA.from.tricistronic.rRNA.transcript..SSU.rRNA..5.8S.rRNA..LSU.rRNA.	0.0749515	1	exos-2, exos-8, exos-3
GO.1900369..negative.regulation.of.RNA.interference	1	1	NA
GO.0019898..extrinsic.component.of.membrane	0.957625	1	snx-1
GO.0031941..filamentous.actin	1	1	NA
GO.0031974..membrane.enclosed.lumen	1	1	NA
GO.0045179..apical.cortex	0.293598	1	ifb-2, rab-8
GO.0016671..oxidoreductase.activity..acting.on.a.sulfur.group.of.donors..disulfide.as.acceptor	0.365391	1	msra-1, txl-1
GO.0004819..glutamine.tRNA.ligase.activity	1	1	NA
GO.0006425..glutaminyl.tRNA.aminoacylation	1	1	NA
GO.0004818..glutamate.tRNA.ligase.activity	1	1	NA
GO.0006424..glutamyl.tRNA.aminoacylation	1	1	NA
GO.0019013..viral.nucleocapsid	1	1	NA
GO.0000982..transcription.factor.activity..RNA.polymerase.II.core.promoter.proximal.region.sequence.specific.binding	0.447014	1	zip-11
GO.0060142..regulation.of.syncytium.formation.by.plasma.membrane.fusion	0.546122	1	vha-1
GO.0007064..mitotic.sister.chromatid.cohesion	0.627474	1	T22C1.4
GO.0005818..aster	0.114116	1	evl-20, gpr-1, lis-1
GO.0030540..female.genitalia.development	0.326275	1	evl-20
GO.0043622..cortical.microtubule.organization	0.179186	1	evl-20
GO.0035150..regulation.of.tube.size	0.794046	1	exc-4
GO.0004364..glutathione.transferase.activity	0.987063	1	exc-4
GO.0006749..glutathione.metabolic.process	0.879312	1	exc-4, gsr-1
GO.0034707..chloride.channel.complex	0.8306	1	best-13, best-1, exc-4
GO.0005089..Rho.guanyl.nucleotide.exchange.factor.activity	0.896758	1	tag-52, pix-1
GO.0035023..regulation.of.Rho.protein.signal.transduction	0.896758	1	tag-52, pix-1
GO.1904531..positive.regulation.of.actin.filament.binding	1	1	NA
GO.0000381..regulation.of.alternative.mRNA.splicing..via.spliceosome	0.937076	1	fox-1
GO.0036195..muscle.cell.projection.membrane	1	1	NA
GO.0016917..GABA.receptor.activity	1	1	NA
GO.0045933..positive.regulation.of.muscle.contraction	1	1	NA
GO.0005242..inward.rectifier.potassium.channel.activity	1	1	NA
GO.0048729..tissue.morphogenesis	0.179186	1	eya-1
GO.0008289..lipid.binding	0.716657	1	ZC513.1, nrf-5, lbp-3, lbp-1, acbp-3, far-6, Y82E9BR.3, unc-119
GO.0005504..fatty.acid.binding	1	1	NA
GO.0019841..retinol.binding	1	1	NA
GO.0070538..oleic.acid.binding	1	1	NA
GO.0042389..omega.3.fatty.acid.desaturase.activity	1	1	NA
GO.0004768..stearoyl.CoA.9.desaturase.activity	0.694249	1	fat-7
GO.0016717..oxidoreductase.activity..acting.on.paired.donors..with.oxidation.of.a.pair.of.donors.resulting.in.the.reduction.of.molecular.oxygen.to.two.molecules.of.water	0.546122	1	fat-7
GO.0016720..delta12.fatty.acid.dehydrogenase.activity	1	1	NA
GO.0030497..fatty.acid.elongation	1	1	NA
GO.0001820..serotonin.secretion	1	1	NA
GO.0032456..endocytic.recycling	0.612531	1	K02E10.1, rab-14
GO.0045088..regulation.of.innate.immune.response	1	1	NA
GO.0042759..long.chain.fatty.acid.biosynthetic.process	1	1	NA
GO.0003707..steroid.hormone.receptor.activity	0.866964	1	nhr-270, sex-1, nhr-17, nhr-25
GO.0043059..regulation.of.forward.locomotion	0.627474	1	pag-3
GO.0042006..masculinization.of.hermaphroditic.germ.line	1	1	NA
GO.0005605..basal.lamina	0.447014	1	agr-1
GO.0016504..peptidase.activator.activity	1	1	NA
GO.0042132..fructose.1.6.bisphosphate.1.phosphatase.activity	1	1	NA
GO.0042578..phosphoric.ester.hydrolase.activity	1	1	NA
GO.0071586..CAAX.box.protein.processing	0.0320972	1	fce-2, fce-1
GO.0001540..beta.amyloid.binding	1	1	NA
GO.0030238..male.sex.determination	0.546122	1	her-1
GO.0033192..calmodulin.dependent.protein.phosphatase.activity	1	1	NA
GO.0035970..peptidyl.threonine.dephosphorylation	1	1	NA
GO.0043280..positive.regulation.of.cysteine.type.endopeptidase.activity.involved.in.apoptotic.process	1	1	NA
GO.0005544..calcium.dependent.phospholipid.binding	0.965226	1	nex-3
GO.0007009..plasma.membrane.organization	1	1	NA
GO.0030317..sperm.motility	1	1	NA
GO.0031268..pseudopodium.organization	1	1	NA
GO.0000494..box.C.D.snoRNA.3.end.processing	0.326275	1	C06E1.9
GO.0008033..tRNA.processing	0.777068	1	F40F9.10, B0024.11, tut-2, H35B03.2, Y62E10A.2
GO.0008649..rRNA.methyltransferase.activity	0.627474	1	C06E1.9
GO.0015030..Cajal.body	0.0847962	1	C06E1.9, frg-1
GO.0031167..rRNA.methylation	0.627474	1	C06E1.9
GO.0031428..box.C.D.snoRNP.complex	0.546122	1	C06E1.9
GO.0032040..small.subunit.processome	0.866964	1	ZK430.7, Y54E5B.2, C34E10.10, C06E1.9
GO.0045727..positive.regulation.of.translation	0.365391	1	unc-62, ife-2
GO.1990258..histone.glutamine.methylation	0.326275	1	C06E1.9
GO.1990259..histone.glutamine.methyltransferase.activity	0.326275	1	C06E1.9
GO.0005528..FK506.binding	0.365391	1	fkb-1, fkb-2
GO.0051879..Hsp90.protein.binding	0.447014	1	sti-1
GO.0051014..actin.filament.severing	0.447014	1	gsnl-1
GO.0005184..neuropeptide.hormone.activity	1	1	NA
GO.0071855..neuropeptide.receptor.binding	1	1	NA
GO.0045759..negative.regulation.of.action.potential	1	1	NA
GO.0042165..neurotransmitter.binding	1	1	NA
GO.0045988..negative.regulation.of.striated.muscle.contraction	1	1	NA
GO.0031841..neuropeptide.Y.receptor.binding	1	1	NA
GO.1904068..G.protein.coupled.receptor.signaling.pathway.involved.in.social.behavior	1	1	NA
GO.0007624..ultradian.rhythm	1	1	NA
GO.0007346..regulation.of.mitotic.cell.cycle	0.913271	1	cst-1, par-5, lmn-1
GO.0031098..stress.activated.protein.kinase.signaling.cascade	0.984234	1	cst-1
GO.0032147..activation.of.protein.kinase.activity	0.971465	1	cst-1
GO.0048511..rhythmic.process	1	1	NA
GO.1902617..response.to.fluoride	1	1	NA
GO.0004499..N.N.dimethylaniline.monooxygenase.activity	0.365391	1	fmo-1, fmo-2
GO.0050661..NADP.binding	0.451183	1	fmo-1, fmo-2, gpd-4, gsr-1
GO.0018992..germ.line.sex.determination	1	1	NA
GO.0030371..translation.repressor.activity	1	1	NA
GO.0040021..hermaphrodite.germ.line.sex.determination	1	1	NA
GO.0008143..poly.A..binding	0.326275	1	fox-1
GO.0008266..poly.U..RNA.binding	0.0847962	1	pos-1, fox-1
GO.0034046..poly.G..binding	0.447014	1	fox-1
GO.0016651..oxidoreductase.activity..acting.on.NAD.P.H	0.208396	1	lpd-5, nuo-2, nduf-2.2
GO.0004322..ferroxidase.activity	1	1	NA
GO.0006783..heme.biosynthetic.process	1	1	NA
GO.0008199..ferric.iron.binding	1	1	NA
GO.0055072..iron.ion.homeostasis	1	1	NA
GO.0045604..regulation.of.epidermal.cell.differentiation	1	1	NA
GO.0004826..phenylalanine.tRNA.ligase.activity	0.149689	1	Y54E10A.6, fars-1
GO.0006432..phenylalanyl.tRNA.aminoacylation	0.149689	1	Y54E10A.6, fars-1
GO.0009328..phenylalanine.tRNA.ligase.complex	0.0847962	1	Y54E10A.6, fars-1
GO.0000287..magnesium.ion.binding	0.936958	1	W04G3.5, tag-231, M01E5.2, C26E6.12
GO.0048681..negative.regulation.of.axon.regeneration	1	1	NA
GO.0006826..iron.ion.transport	1	1	NA
GO.0042308..negative.regulation.of.protein.import.into.nucleus	1	1	NA
GO.0004333..fumarate.hydratase.activity	1	1	NA
GO.0006106..fumarate.metabolic.process	1	1	NA
GO.0006108..malate.metabolic.process	1	1	NA
GO.0045239..tricarboxylic.acid.cycle.enzyme.complex	1	1	NA
GO.0051262..protein.tetramerization	1	1	NA
GO.0008417..fucosyltransferase.activity	0.0891656	1	C05E4.15, F53C3.11, T05A7.11, Y47D3A.1, BE10.3
GO.0032580..Golgi.cisterna.membrane	1	1	NA
GO.0036065..fucosylation	0.0524159	1	fut-2, F11A5.5, F53C3.11, T05A7.11, F17B5.6, Y47D3A.1, BE10.3
GO.0046920..alpha..1..3..fucosyltransferase.activity	1	1	NA
GO.0008107..galactoside.2.alpha.L.fucosyltransferase.activity	0.159127	1	fut-2, F11A5.5, F17B5.6
GO.0043413..macromolecule.glycosylation	0.179186	1	fut-2
[truncated: 3,319 more rows]

## Sheet: F3U up vs. N3U
	p.values	FDR.BH	genes
GO.0008152..metabolic.process	2.46618e-13	1.31152e-09	abt-4, icl-1, ges-1, R05D8.7, R05D8.9, ugt-53, R08F11.1, Y45G5AM.2, ugt-61, ugt-11, ugt-8, ugt-14, ugt-63, C03A7.12, C52A10.1, C52A10.2, B0238.1, F25B4.8, K09H11.1, C53A3.2, dhs-17, F31F7.1, T28C12.4, F13H6.3, alh-4, acl-9, W01A11.1, acs-1, ugt-40, ugt-37, ugt-41, F43H9.4, catp-3, K07C11.4, K07B1.4, hum-2, acs-14, atl-1, ZK856.5, ugt-33, F25D1.5, ugt-34, dhs-18, gpa-1, dhs-19, C55A6.6, dhs-20, tr…
GO.0016787..hydrolase.activity	3.66641e-11	8.26577e-08	egl-8, lipl-5, nas-32, F25A2.1, ges-1, T10B5.7, C31B8.8, R08F11.1, Y45G5AM.2, nas-9, C52A10.1, C52A10.2, B0238.1, K09H11.1, T28C12.4, F13H6.3, F09G2.8, catp-3, K07C11.4, nas-3, lipl-2, uda-1, ZK856.5, ceeh-2, ppm-1, mre-11, nas-21, nas-22, tre-3, aman-2, mans-2, F10C2.5, C27A7.1, rad-50, T02B5.1, cpr-3, F21A3.11, asp-17, gcp-2.1, F56F10.1, gpcp-1, wrt-6, aman-1, K10C2.1, fah-1, cpr-6, asp-3, R09F…
GO.0016491..oxidoreductase.activity	4.6629e-11	8.26577e-08	fmo-5, hacd-1, T10B5.8, F22F7.2, cyp-33C2, cyp-32B1, cyp-33C5, R05D8.7, R05D8.9, cyp-33C9, cyp-35A5, cyp-35B1, cyp-35B2, cyp-34A9, cyp-34A10, cyp-35A3, cyp-35A4, D2063.1, hpo-15, dhs-17, F17A9.5, alh-4, hpo-19, cyp-35A1, cyp-35A2, ftn-1, cyp-33A1, cyp-32A1, F41E6.5, egl-9, F25D1.5, dhs-18, cyp-29A2, dhs-19, C55A6.6, dhs-20, ZK836.2, F53C11.3, cyp-35C1, dhs-23, cyp-35D1, fat-5, amx-3, gpd-3, gpd-2…
GO.0052689..carboxylic.ester.hydrolase.activity	3.1653e-10	4.20827e-07	ges-1, C52A10.1, C52A10.2, B0238.1, T28C12.4, F13H6.3, K07C11.4, T02B5.1, ZC376.3, glit-1, F16F9.4, C23H4.2, C23H4.7, C23H4.3, C23H4.4, F55F3.2, ace-1, C01B10.10, C01B10.4, W02B12.4, F56C11.6, C09D4.4, lid-1, Y71H2AM.13, Y75B8A.3
GO.0046872..metal.ion.binding	4.08865e-10	4.34869e-07	egl-8, nhr-106, nhr-131, nhr-132, nhr-90, nhr-190, nas-32, nhr-178, nhr-238, cyp-33C2, cyp-32B1, nhr-133, cyp-33C5, nhr-228, C31B8.8, cyp-33C9, cyp-35A5, cyp-35B1, cyp-35B2, cyp-34A9, cyp-34A10, cyp-35A3, cyp-35A4, nhr-57, D2063.1, adss-1, nas-9, nhr-47, nhr-142, mrck-1, mtl-1, nhr-286, C05C8.7, cyp-35A1, cyp-35A2, ftn-1, cyp-33A1, cyp-32A1, catp-3, rpm-1, gck-1, nas-3, uda-1, egl-9, ppm-1, gpa-1…
GO.0055114..oxidation.reduction.process	1.14191e-08	1.01211e-05	fmo-5, hacd-1, T10B5.8, F22F7.2, cyp-33C2, cyp-32B1, cyp-33C5, gst-10, R05D8.7, R05D8.9, cyp-33C9, cyp-35A5, cyp-35B1, cyp-35B2, cyp-34A9, cyp-34A10, cyp-35A3, cyp-35A4, D2063.1, hpo-15, K09H11.1, dhs-17, F17A9.5, alh-4, hpo-19, dpy-11, cyp-35A1, cyp-35A2, ftn-1, cyp-33A1, cyp-32A1, F41E6.5, egl-9, F25D1.5, dhs-18, cyp-29A2, dhs-19, C55A6.6, dhs-20, ZK836.2, F53C11.3, cyp-35C1, dhs-23, cyp-35D1, …
GO.0004497..monooxygenase.activity	2.74898e-08	2.08844e-05	fmo-5, cyp-33C2, cyp-32B1, cyp-33C5, cyp-33C9, cyp-35A5, cyp-35B1, cyp-35B2, cyp-34A9, cyp-34A10, cyp-35A3, cyp-35A4, cyp-35A1, cyp-35A2, cyp-33A1, cyp-32A1, cyp-29A2, cyp-35C1, cyp-35D1, cyp-43A1, cyp-14A2, cyp-14A3, tbh-1, cyp-33E2, pah-1, cyp-13A10, cyp-37A1, C46H11.2, pamn-1, C01H6.4, cyp-36A1, cyp-25A1, cyp-25A2, cyp-25A3, fmo-3, cyp-13A11
GO.0003824..catalytic.activity	3.46846e-08	2.30566e-05	icl-1, T10B5.8, R08F11.1, R02D1.2, F17A9.5, W01A11.1, acs-1, odc-1, F09G2.8, F41E6.5, tag-38, acs-14, ceeh-2, ppm-1, T21C9.6, tre-3, pyc-1, aman-2, C27A7.1, F25H9.6, cth-1, Y51A2D.13, acs-12, aakg-4, aman-1, C41A3.1, acs-17, gln-1, fah-1, sur-5, acs-22, B0272.4, W07E11.1, suca-1, gst-42, tre-4, tbh-1, Y7A5A.1, aakg-2, tps-1, Y38F2AR.12, Y67D8A.2, T26C12.1, F15E6.6, tre-2, T22D1.3, atic-1, aagr-1,…
GO.0016301..kinase.activity	9.11579e-08	5.08653e-05	mlk-1, mrck-1, gck-2, gck-1, atl-1, T21C9.6, pkc-1, lurp-4, par-1, dkf-2, gck-3, aakg-4, nck-1, pak-1, svh-2, sek-6, pek-1, sma-5, ppk-3, akt-2, aak-2, aakg-2, egl-4, kgb-2, R11E3.1, lin-45, pmk-2, pct-1, dgk-4, W01B6.5, unc-43, pyk-2, kin-4, ark-1, K09B11.5, C50D2.7, R11F4.1, pkc-3, vrk-1, sma-6, dgk-5, aka-1, cki-2, ire-1, C26D10.4, kin-15, kin-16, wee-1.3, aakg-5, R05H5.4, mnk-1, Y17G7B.10, ma…
GO.0016310..phosphorylation	9.56474e-08	5.08653e-05	W02H5.8, mlk-1, mrck-1, gck-2, gck-1, atl-1, T21C9.6, pkc-1, lurp-4, par-1, dkf-2, gck-3, aakg-4, nck-1, pak-1, svh-2, sek-6, pek-1, sma-5, ppk-3, akt-2, aak-2, aakg-2, Y77E11A.2, egl-4, kgb-2, R11E3.1, lin-45, pmk-2, pct-1, dgk-4, W01B6.5, pps-1, unc-43, pyk-2, kin-4, ark-1, K09B11.5, C50D2.7, R11F4.1, pkc-3, vrk-1, sma-6, dgk-5, aka-1, cki-2, ire-1, C26D10.4, kin-15, kin-16, wee-1.3, aakg-5, R0…
GO.0016740..transferase.activity	9.51035e-07	0.000421467	icl-1, comt-4, gst-10, ugt-53, ugt-61, ugt-11, ugt-8, ugt-14, ugt-63, mrck-1, acl-9, mys-1, ugt-40, ugt-37, ugt-41, gck-1, atl-1, ugt-33, ugt-34, mboa-2, pkc-1, mpst-7, cpt-5, par-1, mpst-3, ugt-30, dkf-2, T20B3.1, gck-3, ugt-46, C15C7.7, C41A3.1, pak-1, svh-2, acl-12, gly-13, ugt-23, F41E7.6, acl-5, hst-2, pek-1, sma-5, akt-2, acl-1, B0395.3, aak-2, tps-1, egl-4, T26C12.1, kgb-2, R11E3.1, elo-5,…
GO.0005506..iron.ion.binding	9.27837e-07	0.000421467	cyp-33C2, cyp-32B1, cyp-33C5, cyp-33C9, cyp-35A5, cyp-35B1, cyp-35B2, cyp-34A9, cyp-34A10, cyp-35A3, cyp-35A4, cyp-35A1, cyp-35A2, cyp-33A1, cyp-32A1, egl-9, cyp-29A2, cyp-35C1, cyp-35D1, cyp-43A1, W07E11.1, cyp-14A2, cyp-14A3, C54E4.5, cyp-33E2, F55B11.1, F49E12.10, pah-1, cyp-13A10, cyp-37A1, cyp-36A1, cyp-25A1, cyp-25A2, cyp-25A3, emb-8, cyp-13A11
GO.0006629..lipid.metabolic.process	1.20699e-06	0.000491964	egl-8, lipl-5, F25A2.1, T10B5.7, R08F11.1, F09G2.8, lipl-2, ceeh-2, fat-5, gpcp-1, C45B2.6, sur-5, acl-12, F09B12.3, acl-1, aak-2, asm-3, K03H6.2, Y54G2A.45, gba-4, elo-5, paqr-1, elo-1, fat-4, R11A8.7, sms-1, fat-6, fat-1, fat-2, elo-2, pod-2, gba-1, gba-2, pmt-1, cgt-3, gpcp-2, F27E5.1, plc-3, haf-4, let-363, drsh-1, lid-1, hpo-13, dagl-2, ceeh-1, F58B6.1, Y54F10AM.8, mtm-3, ZC155.4, ZK370.4, C…
GO.0016705..oxidoreductase.activity..acting.on.paired.donors..with.incorporation.or.reduction.of.molecular.oxygen	1.29513e-06	0.000491964	cyp-33C2, cyp-32B1, cyp-33C5, cyp-33C9, cyp-35A5, cyp-35B1, cyp-35B2, cyp-34A9, cyp-34A10, cyp-35A3, cyp-35A4, cyp-35A1, cyp-35A2, cyp-33A1, cyp-32A1, egl-9, cyp-29A2, cyp-35C1, cyp-35D1, cyp-43A1, cyp-14A2, cyp-14A3, cyp-33E2, cyp-13A10, cyp-37A1, cyp-36A1, cyp-25A1, cyp-25A2, cyp-25A3, cyp-13A11
GO.0005524..ATP.binding	2.12816e-06	0.000754505	abt-4, W02H5.8, prx-6, mlk-1, smut-1, mrck-1, gck-2, catp-3, rol-3, gck-1, hum-2, atl-1, T21C9.6, pyc-1, pkc-1, rad-50, W07G4.3, par-1, rfc-1, dkf-2, pgp-9, gck-3, C25F9.5, C25F9.4, mrp-6, tag-257, pak-1, svh-2, sur-5, mrp-4, sek-6, suca-1, pgp-3, pek-1, sma-5, T14G8.3, ppk-3, akt-2, csb-1, aak-2, drl-1, egl-4, kgb-2, R11E3.1, T11F8.4, lin-45, T05A12.4, klp-18, pmk-2, pct-1, catp-7, dgk-4, catp-6…
GO.0008395..steroid.hydroxylase.activity	3.59881e-06	0.00119615	cyp-33C2, cyp-33C5, cyp-33C9, cyp-35A5, cyp-35B1, cyp-35B2, cyp-34A9, cyp-34A10, cyp-35A3, cyp-35A4, cyp-35A1, cyp-35A2, cyp-33A1, cyp-35C1, cyp-35D1, cyp-33E2, cyp-36A1
GO.0006631..fatty.acid.metabolic.process	4.60624e-06	0.00144094	hacd-1, fat-5, sur-5, elo-5, F58F9.7, paqr-1, elo-1, fat-4, ech-9, ech-8, fat-6, fat-1, fat-2, ZK550.6, elo-2, acox-1, F08A8.4, acdh-11, Y48A6B.9
GO.0055085..transmembrane.transport	6.82894e-06	0.00201757	abt-4, Y19D10A.11, Y61A9LA.1, pst-1, F40F9.5, F17C11.12, folt-1, W05E10.1, sulp-4, C13C4.6, spp-12, F14D7.6, T10C6.6, F57G8.5, pgp-9, Y51A2D.18, hmit-1.1, hmit-1.2, F53H8.3, K09C4.5, mrp-6, C03B1.13, PDB1.1, kqt-2, mrp-4, C14H10.1, F41E7.1, R07E3.4, pgp-3, K09E9.1, ZK185.5, Y4C6B.5, Y4C6B.3, inx-7, kcc-2, pitr-1, glt-6, cima-1, itr-1, ocr-2, C46C2.2, C47E12.2, F13B12.2, T07G12.5, C06G8.3, inx-8, …
GO.0043231..intracellular.membrane.bounded.organelle	7.80287e-06	0.00218398	abt-4, fmo-5, ugt-53, ugt-61, ugt-11, ugt-8, ugt-14, ugt-63, C03A7.12, ugt-40, ugt-37, ugt-41, catp-3, ugt-33, ugt-34, ugt-30, ugt-46, ugt-23, gas-1, catp-7, cyp-33E2, ugt-21, ugt-44, ugt-54, catp-8, acs-20, ugt-22, Y39F10B.1, casy-1, ugt-58, ugt-27, ugt-25, ugt-62, C23G10.6, fmo-3
GO.0020037..heme.binding	1.32417e-05	0.00352096	cyp-33C2, cyp-32B1, cyp-33C5, cyp-33C9, cyp-35A5, cyp-35B1, cyp-35B2, cyp-34A9, cyp-34A10, cyp-35A3, cyp-35A4, cyp-35A1, cyp-35A2, cyp-33A1, cyp-32A1, glb-3, cyp-29A2, D2023.1, cyp-35C1, cyp-35D1, hrg-1, cyp-43A1, cyp-14A2, cyp-14A3, cytb-5.1, cyp-33E2, glb-9, glb-27, cyp-13A10, cyp-37A1, ctl-2, ctl-1, cyp-36A1, cyp-25A1, cyp-25A2, cyp-25A3, tdo-2, B0361.4, cyp-13A11
GO.0043547..positive.regulation.of.GTPase.activity	2.26234e-05	0.00572911	rga-3, glo-4, rme-6, F46H5.4, rgs-10, ric-8, bris-1, tag-77, pxf-1, ced-5, srgp-1, efa-6, ephx-1, tbc-2, flcn-1, ect-2, R06F6.8, cnt-1, hgap-1, tiam-1, tom-1, tbcd-1, ced-12, Y106G6G.2, F22G12.5, agef-1, rbg-3, T04C9.1, ran-2, pac-1, epac-1, W09D10.1
GO.0004674..protein.serine.threonine.kinase.activity	3.49693e-05	0.00845304	mrck-1, gck-1, atl-1, pkc-1, par-1, dkf-2, gck-3, pak-1, sek-6, pek-1, sma-5, akt-2, aak-2, drl-1, egl-4, kgb-2, T11F8.4, lin-45, pmk-2, pct-1, C04G2.10, unc-43, kin-4, ark-1, pkc-3, ZK177.2, vrk-1, mps-1, sma-6, ire-1, wee-1.3, F49C5.4, max-2, gcn-2, atm-1, cdk-7, F23C8.8, let-502, M04F3.3, let-363, mtk-1, rskn-2, rskn-1, cdk-8, csnk-1, wts-1, dlk-1, taf-1, cdk-12, efk-1, F31E3.2, prk-1, ikke-1,…
GO.0005770..late.endosome	5.4373e-05	0.0115662	spe-39, hrg-1, ncr-1, vps-41, tbc-2, vps-35, rab-7, rme-8
GO.0009813..flavonoid.biosynthetic.process	5.32989e-05	0.0115662	ugt-53, ugt-61, ugt-11, ugt-8, ugt-14, ugt-63, C03A7.12, ugt-40, ugt-37, ugt-41, ugt-33, ugt-34, ugt-30, ugt-46, ugt-23, ugt-21, ugt-44, ugt-54, ugt-22, ugt-58, ugt-27, ugt-25, ugt-62, C23G10.6
GO.0052696..flavonoid.glucuronidation	5.32989e-05	0.0115662	ugt-53, ugt-61, ugt-11, ugt-8, ugt-14, ugt-63, C03A7.12, ugt-40, ugt-37, ugt-41, ugt-33, ugt-34, ugt-30, ugt-46, ugt-23, ugt-21, ugt-44, ugt-54, ugt-22, ugt-58, ugt-27, ugt-25, ugt-62, C23G10.6
GO.0045121..membrane.raft	8.29054e-05	0.0169573	dod-19, F54E2.1, gfi-1, F57F4.4, tre-3, dct-17, F35E12.6, F35E12.5, F53C11.1, C29F3.7, F56F10.1, C26B9.5, K10C2.1, nep-22, Y16B4A.2, hpo-6, pcp-2, F08G5.6, nep-17, tag-10
GO.0015020..glucuronosyltransferase.activity	0.00012162	0.0239546	ugt-61, ugt-11, ugt-8, ugt-14, C03A7.12, ugt-40, ugt-37, ugt-41, ugt-33, ugt-34, ugt-30, ugt-46, ugt-23, ugt-21, ugt-44, rib-1, ugt-22, ugt-58, ugt-27, ugt-25, ugt-62, C23G10.6
GO.0016758..transferase.activity..transferring.hexosyl.groups	0.000197448	0.0375011	ugt-53, ugt-61, ugt-11, ugt-8, ugt-14, ugt-63, C03A7.12, ugt-40, ugt-37, ugt-41, ugt-33, ugt-34, ugt-30, ugt-46, ugt-23, ugt-21, ugt-44, ugt-54, ugt-22, ugt-58, ugt-27, ugt-25, chs-1, ugt-62, C23G10.6
GO.0005764..lysosome	0.000211513	0.0387871	cpz-2, cpr-3, hrg-1, ncr-1, vps-41, cpr-6, asp-3, R09F10.1, chup-1, nuc-1, R07E3.1, asp-4, cima-1, aagr-1, catp-6, Y40H7A.10, aagr-2, F27E5.1, rab-7, F15D4.4, vps-16
GO.0045087..innate.immune.response	0.000232631	0.0412377	dod-19, clec-206, irg-3, clec-210, cyp-35A5, nhr-57, F31F7.1, rol-3, lys-1, lys-2, dct-17, F35E12.6, F35E12.5, F53C11.1, F53C11.3, cpr-3, C29F3.7, dkf-2, F11D11.3, Y43F8B.2, F56F10.1, asp-14, PDB1.1, pgp-3, F18H3.4, akt-2, tag-244, clec-82, clec-83, clec-84, clec-85, clec-67, clec-74, clec-75, R07C12.3, F19C7.1, R11E3.1, W01B6.5, ugt-44, fat-6, F08G5.6, ark-1, clec-186, clec-187, K08D8.4, K08D8.5…
GO.0022891..substrate.specific.transmembrane.transporter.activity	0.000309814	0.0531481	F17C11.12, hmit-1.1, hmit-1.2, F53H8.3, F13B12.2, fgt-1, B0252.3, hmit-1.3, B0361.11, svop-1
GO.0016798..hydrolase.activity..acting.on.glycosyl.bonds	0.000321279	0.0533926	R08F11.1, tre-3, aman-2, mans-2, F10C2.5, aman-1, tre-4, asm-3, tre-2, aagr-1, C47E12.3, mogs-1, aagr-2, aman-3, tre-1, hpo-13
GO.0006468..protein.phosphorylation	0.000414564	0.0629901	mlk-1, C24G6.2, mrck-1, gck-2, F09G2.1, rol-3, gck-1, atl-1, pkc-1, W07G4.3, par-1, dkf-2, gck-3, tag-257, pak-1, svh-2, sek-6, pek-1, sma-5, akt-2, aak-2, drl-1, egl-4, Y67D8A.2, kgb-2, R11E3.1, T11F8.4, lin-45, pmk-2, pct-1, W01B6.5, unc-43, kin-4, ark-1, K09B11.5, Y105C5A.24, pkc-3, vrk-1, sma-6, ire-1, kin-15, kin-16, wee-1.3, R05H5.4, mnk-1, F49C5.4, max-2, gcn-2, atm-1, cdk-7, F23C8.8, let-…
GO.0009410..response.to.xenobiotic.stimulus	0.000406146	0.0629901	cyp-35A5, cyp-35A3, cyp-35A4, cyp-35A1, cyp-35A2, cyp-35C1
GO.0000145..exocyst	0.000406146	0.0629901	sec-3, sec-10, sec-6, exoc-7, sec-8, exoc-8
GO.0035556..intracellular.signal.transduction	0.000432251	0.0638531	egl-8, mrck-1, pkc-1, dkf-2, M60.7, akt-2, aak-2, lin-45, pmk-2, dgk-4, C53B4.4, C04G2.10, ced-5, kin-4, let-99, Y45F10A.7, F59A6.5, pkc-3, ZK177.2, dgk-5, plc-3, mnk-1, F49C5.4, W02B8.2, F23C8.8, let-502, F27C1.11, unc-13, rskn-2, rskn-1, acy-3, T08A11.1, acy-1, epac-1
GO.0005615..extracellular.space	0.000525505	0.0755307	ges-1, tig-2, C52A10.1, C52A10.2, B0238.1, T28C12.4, F13H6.3, srp-6, K07C11.4, cpz-2, ttr-44, T02B5.1, ZC376.3, cpr-3, ttr-25, wrt-6, glit-1, cpr-6, R09F10.1, gpx-5, R07E3.1, C23H4.2, C23H4.7, C23H4.3, C23H4.4, asp-4, F55F3.2, ace-1, osm-11, C44B12.6, gpx-4, C01B10.10, C01B10.4, svh-1, gpx-6, egl-21, lin-3, scl-5, Y41E3.1, Y40H7A.10, sod-5, casy-1, W02B12.4, F15D4.4, F56C11.6, Y18H1A.9, cpd-1, W0…
GO.0006874..cellular.calcium.ion.homeostasis	0.000573394	0.080245	catp-7, catp-6, catp-8, ncx-4, pmr-1, spe-41, pdfr-1
GO.0022857..transmembrane.transporter.activity	0.000600121	0.0818319	Y61A9LA.1, F17C11.12, folt-1, T10C6.6, Y51A2D.18, hmit-1.1, hmit-1.2, F53H8.3, K09C4.5, C03B1.13, cima-1, F13B12.2, C39E9.7, slc-17.4, fgt-1, F41C3.2, K05F1.6, B0252.3, F14E5.1, W04C9.6, Y82E9BR.16, hmit-1.3, B0361.11, slc-17.3, svop-1, slc-17.2, vglu-2, vglu-3
GO.0005096..GTPase.activator.activity	0.000630987	0.0818436	rga-3, rme-6, rgs-10, ric-8, pxf-1, srgp-1, tbc-2, ect-2, cnt-1, hgap-1, tom-1, tbcd-1, rbg-3, T04C9.1, ran-2, pac-1, W09D10.1
GO.0004348..glucosylceramidase.activity	0.000619577	0.0818436	R08F11.1, gba-4, gba-1, gba-2, hpo-13
GO.0006559..L.phenylalanine.catabolic.process	0.000728713	0.0901232	gst-42, pah-1, hgo-1, hpd-1
GO.0030976..thiamine.pyrophosphate.binding	0.000728713	0.0901232	ZK836.2, T26C12.1, ogdh-1, B0334.3
GO.0004672..protein.kinase.activity	0.000854643	0.103295	mlk-1, C24G6.2, mrck-1, gck-2, F09G2.1, rol-3, gck-1, pkc-1, W07G4.3, par-1, dkf-2, gck-3, tag-257, pak-1, svh-2, sek-6, pek-1, sma-5, akt-2, aak-2, drl-1, egl-4, kgb-2, R11E3.1, T11F8.4, lin-45, pmk-2, pct-1, W01B6.5, unc-43, kin-4, ark-1, K09B11.5, Y105C5A.24, pkc-3, vrk-1, sma-6, ire-1, kin-15, kin-16, wee-1.3, R05H5.4, mnk-1, F49C5.4, max-2, gcn-2, cdk-7, F23C8.8, let-502, M04F3.3, mtk-1, prp…
GO.0008340..determination.of.adult.lifespan	0.000999656	0.118137	egl-8, dod-19, icl-1, ges-1, F56A4.3, gst-10, cyp-35B1, cyp-34A9, Y61A9LA.5, cwp-4, mlk-1, hpo-15, alh-4, mtl-1, npa-1, ftn-1, lmd-3, egl-9, folt-1, C06H2.7, sas-5, pyc-1, cdr-6, spp-12, amx-3, gpd-3, gpd-2, vit-5, tbc-7, acs-17, mdl-1, asp-3, bar-1, adt-2, eef-1A.2, utx-1, nuc-1, pek-1, sma-5, akt-2, tbc-1, tbh-1, gas-1, aak-2, sod-3, tps-1, daf-18, asm-3, Y55F3AM.3, Y41D4B.4, egl-4, set-9, jmjd…
GO.0009949..polarity.specification.of.anterior.posterior.axis	0.00104829	0.121191	par-1, pod-2, lin-17, nmy-2, par-6, par-3
GO.0006516..glycoprotein.catabolic.process	0.00118084	0.133611	F35F10.1, C17B7.5, C04E12.5, C04E12.10, T20D4.5, T20D4.4, T20D4.3
GO.0005886..plasma.membrane	0.00153769	0.170364	egl-8, sid-1, F13H6.3, glr-5, gck-1, ehbp-1, AC3.5, lgc-44, kcnl-4, T10C6.6, dkf-2, rme-6, sec-3, wrt-6, pak-1, svh-2, npr-8, chup-1, F47E1.2, pgp-3, flr-1, acr-12, acr-9, rgs-10, ace-1, swt-1, daf-18, inx-7, paqr-1, lip-1, sax-7, ocr-2, catp-6, ced-5, C06G8.3, lin-3, inx-8, C42C1.11, igdb-2, eak-7, vha-7, atgp-1, nra-1, fcho-1, fgt-1, pkc-3, clr-1, ehs-1, cgt-3, mps-1, sma-6, clh-3, acr-14, kin-…
GO.0005085..guanyl.nucleotide.exchange.factor.activity	0.00160332	0.174009	glo-4, rme-6, F46H5.4, ric-8, pxf-1, ced-5, flcn-1, ect-2, ced-12, F22G12.5, epac-1
GO.0004180..carboxypeptidase.activity	0.00164436	0.174894	gcp-2.1, K10C2.1, Y16B4A.2, egl-21, F13D12.6, Y18H1A.9, cpd-1, ccpp-1, ZC434.9
GO.0031929..TOR.signaling	0.00187331	0.191582	atf-5, daf-15, gcn-2, rict-1, let-363
GO.0006164..purine.nucleotide.biosynthetic.process	0.00187331	0.191582	adss-1, T22D1.3, atic-1, gmps-1, F10F2.2
GO.0017137..Rab.GTPase.binding	0.00194801	0.195463	ehbp-1, rme-6, vps-52, Y39F10B.1, R06F6.8, tom-1, tir-1, tbc-8
GO.0005794..Golgi.apparatus	0.00199396	0.196368	pst-1, vps-54, aman-2, vps-41, vps-52, chup-1, gly-13, hst-2, cogc-8, swt-1, ntp-1, tbc-3, sms-1, mon-2, gly-10, pld-1, fut-3, casy-1, sqv-7, rab-39, wee-1.3, R05D11.9, sqv-5, pmr-1, apg-1, gly-3, mig-22, vps-53, pad-2, gly-8, tat-1, tpst-1, gly-5
GO.0006508..proteolysis	0.00203621	0.196883	nas-32, C31B8.8, nas-9, cpi-2, srp-6, nas-3, AC3.5, nas-21, nas-22, T28H10.3, asp-10, cpz-2, cpr-3, asp-17, gcp-2.1, F56F10.1, trpp-12, wrt-6, C26B9.5, K10C2.1, asp-14, cpr-6, asp-3, nep-4, adt-2, R09F10.1, nep-22, R07E3.1, asp-4, Y16B4A.2, otub-4, odr-8, imp-3, svh-1, pcp-2, egl-21, C42C1.11, ced-3, Y40H7A.10, rom-4, try-9, C44B7.11, F22D3.6, B0495.7, F13D12.6, F15D4.4, nep-17, Y65B4A.2, Y18H1A.…
GO.0007049..cell.cycle	0.00230372	0.215332	sas-5, rad-50, puf-7, let-99, pqn-85, scc-1, lin-23, lin-5, zyg-9, puf-5, dpl-1, wee-1.3, puf-6, atm-1, cdk-7, him-1, spd-5, lin-35, cdc-25.1, goa-1, spd-2, csnk-1, par-6, cpg-1, smc-4, par-3, cyk-1, ran-2, sas-4, cya-1, emb-30, Y43F4A.1, cdk-5
GO.0032880..regulation.of.protein.localization	0.00230799	0.215332	egl-9, lnp-1, sand-1, ipla-1, lin-5, ect-2, ppk-1, unc-14, ulp-1, wrm-1, cdk-5
GO.0040027..negative.regulation.of.vulval.development	0.00320247	0.262011	adss-1, npa-1, mys-1, pap-1, H39E23.3, par-1, cdt-2, spat-3, utx-1, lin-15B, lin-15A, hecd-1, pitr-1, hcf-1, lin-3, mep-1, mig-32, ark-1, cfp-1, athp-2, pkc-3, fbf-1, cth-2, ada-2, cki-2, orc-2, lin-29, ash-2, lin-17, let-526, lin-35, pbrm-1, sin-3, cdk-8, lin-41, usp-48, sur-2, sumv-1, par-3, sma-4, isw-1, T07E3.3, F31E3.2, lin-13, lin-36, met-2, zfp-1, glp-1, M03C11.3
GO.0005769..early.endosome	0.00298253	0.262011	spe-39, eea-1, rme-6, hrg-1, vps-41, snx-17, sand-1, rme-8, snx-27, tbc-8
GO.0030246..carbohydrate.binding	0.00309378	0.262011	clec-206, clec-210, clec-1, aman-2, clec-57, clec-56, clec-55, clec-231, clec-257, clec-49, clec-50, gpcp-1, aman-1, lec-9, clec-82, clec-83, clec-84, clec-85, clec-173, clec-67, clec-74, clec-75, clec-52, aagr-1, clec-186, clec-187, gly-10, clec-118, aagr-2, gpcp-2, clec-8, clec-62, clec-63, clec-65, clec-53, aman-3, clec-87, W04B5.3, gly-3, gly-5
GO.0006636..unsaturated.fatty.acid.biosynthetic.process	0.00316509	0.262011	elo-1, fat-4, fat-1, fat-2
GO.0008432..JUN.kinase.binding	0.00316509	0.262011	glh-4, glh-2, glh-1, unc-16
GO.0004555..alpha.alpha.trehalase.activity	0.00316509	0.262011	tre-3, tre-4, tre-2, tre-1
GO.0005991..trehalose.metabolic.process	0.00316509	0.262011	tre-3, tre-4, tre-2, tre-1
GO.0005993..trehalose.catabolic.process	0.00316509	0.262011	tre-3, tre-4, tre-2, tre-1
GO.0006633..fatty.acid.biosynthetic.process	0.00337268	0.2677	fat-5, elo-5, elo-1, fat-4, fat-6, fat-1, fat-2, T28F3.5, elo-2, pod-2, F49E12.10, Y48A6B.9
GO.0000139..Golgi.membrane	0.00335527	0.2677	pst-1, aman-2, mans-2, gly-13, hst-2, cogc-8, swt-1, ntp-1, sms-1, gly-10, nstp-4, sqv-7, F14E5.2, wee-1.3, aman-3, pmr-1, gly-3, ugtp-1, sec-16, gly-8, tat-1, tpst-1, gly-5
GO.0000166..nucleotide.binding	0.00448839	0.291089	abt-4, R05D8.7, prx-6, adss-1, mrck-1, spn-4, gck-2, catp-3, rol-3, gck-1, hum-2, atl-1, F25D1.5, gpa-1, pyc-1, pkc-1, rad-50, gpa-13, par-1, dkf-2, pgp-9, gck-3, mrp-6, rpl-25.1, H28G03.1, pak-1, svh-2, sur-5, eef-1A.2, mrp-4, sek-6, suca-1, pgp-3, pek-1, sma-5, T14G8.3, pab-2, akt-2, aak-2, Y55F3AM.3, egl-4, kgb-2, R11E3.1, lin-45, klp-18, pmk-2, pct-1, catp-7, dgk-4, rap-1, catp-6, uba-1, W01B…
GO.0030431..sleep	0.00443764	0.291089	egl-4, pde-4, acy-1
GO.0019829..cation.transporting.ATPase.activity	0.00431859	0.291089	catp-3, catp-7, catp-6, catp-8, cua-1
GO.0006826..iron.ion.transport	0.00443764	0.291089	ftn-1, F21D5.3, ftn-2
GO.0006572..tyrosine.catabolic.process	0.00443764	0.291089	gst-42, hgo-1, hpd-1
GO.0045178..basal.part.of.cell	0.00443764	0.291089	nid-1, par-3, maa-1
GO.0061064..negative.regulation.of.nematode.larval.development	0.00443764	0.291089	xpf-1, slx-1, gen-1
GO.0005381..iron.ion.transmembrane.transporter.activity	0.00443764	0.291089	fpn-1.2, F21D5.3, fpn-1.1
GO.0034755..iron.ion.transmembrane.transport	0.00443764	0.291089	fpn-1.2, F21D5.3, fpn-1.1
GO.0098656..anion.transmembrane.transport	0.00443764	0.291089	sulp-4, K09E9.1, abts-1
GO.0004559..alpha.mannosidase.activity	0.00443764	0.291089	aman-2, aman-1, aman-3
GO.0006013..mannose.metabolic.process	0.00443764	0.291089	aman-2, aman-1, aman-3
GO.0015923..mannosidase.activity	0.00443764	0.291089	aman-2, aman-1, aman-3
GO.0008821..crossover.junction.endodeoxyribonuclease.activity	0.00443764	0.291089	slx-1, him-18, gen-1
GO.0051601..exocyst.localization	0.00443764	0.291089	sec-3, sec-6, exoc-8
GO.0006974..cellular.response.to.DNA.damage.stimulus	0.00481971	0.30881	atl-1, mre-11, dvc-1, rad-50, rfc-1, set-9, fan-1, T05A12.4, K08F4.1, rev-1, swsn-7, R06F6.8, R03D7.2, xpf-1, atm-1, pif-1, msh-6, xnp-1, him-1, slx-1, mtk-1, sin-3, gei-17, lem-3, rtel-1, trpp-11, prmt-5, polq-1, chl-1, mlh-1
GO.0016021..integral.component.of.membrane	0.00515939	0.326639	abt-4, hacd-1, fpn-1.2, T06A1.5, Y19D10A.11, ugt-53, C17B7.5, C04E12.5, C04E12.10, Y39H10B.2, R08F11.1, rft-1, rft-2, gnrr-5, Y61A9LA.1, ZC266.1, ugt-61, ugt-11, ugt-8, ugt-14, ugt-63, sid-1, C24G6.2, pst-1, R01B10.4, jamp-1, alh-4, hpo-19, acl-9, dpy-11, EGAP9.3, ZK1055.2, syx-18, col-142, T15B7.14, ptr-15, Y57E12AL.1, ugt-40, ugt-37, ugt-41, F09G2.8, F09G2.1, catp-3, rol-3, otpl-6, otpl-4, acd-…
GO.0003993..acid.phosphatase.activity	0.00590056	0.369167	F21A3.11, acp-6, Y105C5B.15, C27A2.12, pho-12, F26C11.1, pho-10, pho-11, F46F11.1, pho-5
GO.0005507..copper.ion.binding	0.00607977	0.371635	tbh-1, F21D5.3, mig-38, sod-5, pamn-1, cutc-1, cua-1
GO.0004181..metallocarboxypeptidase.activity	0.00607977	0.371635	gcp-2.1, egl-21, Y18H1A.9, cpd-1, ccpp-1, W01A8.6, ZC434.9
GO.0016887..ATPase.activity	0.00643282	0.388747	abt-4, rme-1, rad-50, pgp-9, mrp-6, mrp-4, pgp-3, klp-18, ntp-1, catp-7, catp-6, klp-12, catp-8, lex-1, pmp-2, pgp-11, haf-4, pgp-2, haf-9, wht-6, isw-1, klp-7, Y75B8A.4, mrp-8, klp-19, mlh-1
GO.0016020..membrane	0.0066763	0.398928	abt-4, fmo-5, hacd-1, fpn-1.2, T06A1.5, ugt-53, C17B7.5, C04E12.5, C04E12.10, Y39H10B.2, R08F11.1, rft-1, rft-2, gnrr-5, Y61A9LA.1, ZC266.1, ugt-61, ugt-11, ugt-8, ugt-14, ugt-63, sid-1, C24G6.2, pst-1, R01B10.4, jamp-1, F13H6.3, alh-4, hpo-19, acl-9, dpy-11, EGAP9.3, ZK1055.2, syx-18, col-142, T15B7.14, ptr-15, Y57E12AL.1, ugt-40, ugt-37, ugt-41, F09G2.8, F09G2.1, catp-3, rol-3, otpl-6, otpl-4, …
GO.0007506..gonadal.mesoderm.development	0.00736967	0.43068	mep-1, pkc-3, max-2, drsh-1, par-6, par-3
GO.0000712..resolution.of.meiotic.recombination.intermediates	0.00736967	0.43068	him-17, xpf-1, slx-1, helq-1, him-18, R05D3.12
GO.0019899..enzyme.binding	0.00780345	0.446223	ced-5, rib-1, xpf-1, rnp-8, slx-1, sqv-5, ced-12, him-18, mig-22
GO.0007548..sex.differentiation	0.00780345	0.446223	dmd-7, dmd-10, lin-15B, lin-15A, fem-3, mep-1, fbf-1, mab-3, met-2
GO.0005777..peroxisome	0.0079611	0.450395	ges-1, dhs-28, B0272.4, F58F9.7, pmp-2, F54B3.1, ctl-2, ctl-1, acox-1, F08A8.4, Y75B8A.4
GO.0004768..stearoyl.CoA.9.desaturase.activity	0.0082561	0.457354	fat-5, fat-4, fat-6, fat-2
GO.0032012..regulation.of.ARF.protein.signal.transduction	0.0082561	0.457354	bris-1, efa-6, Y106G6G.2, agef-1
GO.0007338..single.fertilization	0.00840646	0.460882	pkc-3, par-6, spe-41, par-3, egg-2
GO.0019915..lipid.storage	0.00896222	0.486338	lipl-5, nhr-178, F56A4.3, gst-10, cyp-35A5, cyp-35B1, cyp-35A3, nhr-142, acs-1, glo-4, vps-54, H27A22.1, mre-11, T11F9.10, W05E10.2, F15B9.10, F53C11.3, vps-39, trpp-12, gpd-3, gpd-2, K09C4.5, lnp-1, tag-257, dhs-28, acl-12, F54F7.2, swt-1, npp-8, odr-8, klp-18, nhr-8, F33D4.6, F20D12.2, islo-1, nhr-66, ugt-21, elo-1, T13F2.6, C24F3.2, ech-8, enpl-1, fat-6, LLC1.2, hhat-2, Y41E3.11, ZK550.6, elo-…
GO.0006259..DNA.metabolic.process	0.00929336	0.499213	mre-11, nuc-1, eri-1, wrn-1, xpf-1, dna-2, R05D3.12
GO.0007275..multicellular.organism.development	0.00963176	0.512217	mys-1, sas-5, par-1, fat-5, gck-3, wrt-6, hlh-13, ncr-1, lnp-1, pak-1, bar-1, hst-2, akt-2, rgs-10, lin-15B, lin-15A, dsl-3, egl-4, ric-8, puf-7, skn-1, lin-45, itr-1, fem-3, wrt-3, mep-1, fat-6, gex-3, let-99, pkc-3, vrk-1, fbf-1, sma-6, ani-2, lin-23, zyg-11, nrf-6, puf-5, wee-1.3, mab-3, puf-6, lin-17, let-502, spd-5, wago-1, gls-1, spd-2, lin-41, drsh-1, wts-1, hmr-1, par-6, pad-1, sur-2, smp…
GO.0016358..dendrite.development	0.00990101	0.521322	hst-2, nhr-67, wwp-1, lpd-3, lin-59, trpp-8, ccpp-1, lem-3, T24D1.3, smd-1, sur-2, unc-32
GO.0005975..carbohydrate.metabolic.process	0.0101523	0.529311	EGAP9.3, C05C8.7, lys-1, lys-2, aman-2, chil-10, C15C7.7, aman-1, H18N23.2, gba-4, klo-1, aagr-1, atgp-1, C50D2.7, gba-1, gba-2, chil-24, R11F4.1, aagr-2, chil-13, ldh-1, hex-4, aman-3, gale-1, gpdh-1, klo-2, F59B2.3, pad-2
GO.0042659..regulation.of.cell.fate.specification	0.0103104	0.529988	bar-1, lin-15B, lin-15A, lip-1, lin-3, lin-26, dpl-1, lin-17
GO.0006812..cation.transport	0.0103646	0.529988	F57G8.5, PDB1.1, F41E7.1, ZK185.5, K07H8.2, catp-7, catp-6, catp-8, nhx-6, gon-2, cua-1
GO.0006417..regulation.of.translation	0.0106639	0.540102	pek-1, puf-7, skn-1, rde-11, puf-5, ife-5, puf-6, gcn-2, rde-10, let-363
GO.0050660..flavin.adenine.dinucleotide.binding	0.0110546	0.549426	fmo-5, K09H11.1, W07E11.1, Y7A5A.1, F15E6.6, F58F9.7, F55B11.1, F54D5.7, C46H11.2, C01H6.4, F36A2.2, acox-1, F08A8.4, spr-5, acdh-11, fmo-3
GO.0016324..apical.plasma.membrane	0.0110546	0.549426	gck-1, sulp-4, hmit-1.1, hmit-1.2, pgp-3, Y45F10C.6, ptc-3, pkc-3, vha-6, che-14, lrp-1, wts-1, hmit-1.3, pan-1, tat-1, mtm-6
GO.0005913..cell.cell.adherens.junction	0.0118039	0.570663	bar-1, sax-7, mel-11, let-502, hmr-1, lon-1
GO.0051729..germline.cell.cycle.switching..mitotic.to.meiotic.cell.cycle	0.0116677	0.570663	mre-11, folt-1, C06H2.7, him-17, aak-2, fbf-1, nos-2, cdc-25.1, capg-1, gls-1, tat-5, smc-4, glp-1
GO.0016810..hydrolase.activity..acting.on.carbon.nitrogen..but.not.peptide..bonds	0.0118039	0.570663	upb-1, dhp-1, nit-1, T12A2.1, F59B2.3, nft-1
GO.0046662..regulation.of.oviposition	0.0125096	0.599333	egl-8, ncr-1, lnp-1, egl-4, mig-32, nfi-1, egl-30, unc-38, unc-13, goa-1, scpl-1, mtm-3
GO.0016757..transferase.activity..transferring.glycosyl.groups	0.0126782	0.601989	ugt-61, ugt-30, ugt-46, C15C7.7, gly-13, ugt-23, tps-1, ugt-21, ugt-22, gly-10, fut-3, cgt-3, ugt-58, C14A4.3, tps-2, ugt-27, ugt-25, pigv-1, ugt-62, C23G10.6, ogt-1, gly-3, bre-3, pad-2, gly-8, gly-5
GO.0030154..cell.differentiation	0.0129909	0.611378	spe-39, rol-3, gck-1, gck-3, hlh-13, egl-13, lin-15B, lin-15A, R11E3.1, puf-7, lin-45, fem-3, W01B6.5, nhr-67, mep-1, ark-1, K09B11.5, pkc-3, fbf-1, ani-2, puf-5, wee-1.3, mab-3, R05H5.4, max-2, puf-6, let-502, F26E4.5, drsh-1, hmr-1, par-6, smp-1, tir-1, par-3, met-2, glp-1
GO.0007020..microtubule.nucleation	0.0145569	0.627058	spd-5, nud-2, spd-2, rsa-1, klp-7
GO.0006990..positive.regulation.of.transcription.from.RNA.polymerase.II.promoter.involved.in.unfolded.protein.response	0.0155644	0.627058	skn-1, ire-1, xbp-1
GO.0004197..cysteine.type.endopeptidase.activity	0.0139288	0.627058	T28H10.3, cpz-2, cpr-3, cpr-6, R09F10.1, R07E3.1, ced-3, Y40H7A.10, F22D3.6, F15D4.4
GO.0004185..serine.type.carboxypeptidase.activity	0.0142988	0.627058	F56F10.1, C26B9.5, K10C2.1, Y16B4A.2, pcp-2, egl-21, F13D12.6, cpd-1
GO.0016717..oxidoreductase.activity..acting.on.paired.donors..with.oxidation.of.a.pair.of.donors.resulting.in.the.reduction.of.molecular.oxygen.to.two.molecules.of.water	0.0155644	0.627058	fat-5, fat-6, fat-2
GO.0004322..ferroxidase.activity	0.0155644	0.627058	ftn-1, F21D5.3, ftn-2
GO.0006096..glycolytic.process	0.0142988	0.627058	ZK836.2, gpd-3, gpd-2, ogdh-1, pyk-2, C50D2.7, ipgm-1, aldo-1
GO.0042632..cholesterol.homeostasis	0.0155644	0.627058	ncr-1, nhr-8, ncr-2
GO.0006624..vacuolar.protein.processing	0.0155644	0.627058	spe-39, T28H10.3, vps-41
GO.0000938..GARP.complex	0.0155644	0.627058	vps-54, vps-52, vps-53
GO.0003997..acyl.CoA.oxidase.activity	0.0155644	0.627058	F58F9.7, acox-1, F08A8.4
GO.0006515..misfolded.or.incompletely.synthesized.protein.catabolic.process	0.0155644	0.627058	C34B2.6, ymel-1, Y75B8A.4
GO.0006072..glycerol.3.phosphate.metabolic.process	0.0155644	0.627058	R11F4.1, T25G3.4, gpdh-1
GO.0006517..protein.deglycosylation	0.0155644	0.627058	aman-2, aman-1, aman-3
GO.0004301..epoxide.hydrolase.activity	0.0155644	0.627058	ceeh-2, C42C1.11, ceeh-1
GO.0005355..glucose.transmembrane.transporter.activity	0.0155644	0.627058	hmit-1.1, hmit-1.2, hmit-1.3
GO.0035428..hexose.transmembrane.transport	0.0155644	0.627058	hmit-1.1, hmit-1.2, hmit-1.3
GO.0046323..glucose.import	0.0155644	0.627058	hmit-1.1, hmit-1.2, hmit-1.3
GO.1904659..glucose.transmembrane.transport	0.0155644	0.627058	hmit-1.1, hmit-1.2, hmit-1.3
GO.0008233..peptidase.activity	0.016083	0.638281	nas-32, C31B8.8, nas-9, cpi-2, srp-6, nas-3, nas-21, nas-22, T28H10.3, asp-10, cpr-3, asp-17, gcp-2.1, F56F10.1, wrt-6, K10C2.1, asp-14, cpr-6, asp-3, adt-2, R09F10.1, asp-4, Y16B4A.2, otub-4, odr-8, imp-3, ced-3, rom-4, try-9, C44B7.11, B0495.7, F13D12.6, ccpp-1, nas-5, C34B2.6, toh-1, ulp-1, nas-28, dpy-31, ymel-1, Y75B8A.4, Y43F4A.1
GO.0016311..dephosphorylation	0.0160777	0.638281	C53A3.2, F21A3.11, acp-6, Y105C5B.15, Y10G11A.1, C27A2.12, pho-12, F26C11.1, pho-10, pho-11, cel-1, scpl-1, F25B5.3, pho-5
GO.0007189..adenylate.cyclase.activating.G.protein.coupled.receptor.signaling.pathway	0.0167665	0.641469	fshr-1, acy-3, acy-1, pdfr-1
GO.0000118..histone.deacetylase.complex	0.0167665	0.641469	hda-2, sin-3, hda-3, gei-8
GO.0004499..N.N.dimethylaniline.monooxygenase.activity	0.0167665	0.641469	fmo-5, C46H11.2, C01H6.4, fmo-3
GO.0004407..histone.deacetylase.activity	0.0167665	0.641469	hda-6, hda-2, sin-3, hda-3
GO.0046488..phosphatidylinositol.metabolic.process	0.0167665	0.641469	ppk-3, ipla-1, ppk-1, mtm-6
GO.0040025..vulval.development	0.0230711	0.647123	par-1, egl-13, lin-15A, osm-11, daf-18, lin-45, sqv-1, lin-3, mep-1, sqv-7, lin-26, lin-29, ras-1, K12C11.1, xnp-1, sin-3, spd-2, sqv-5, ksr-2, wrm-1, cyk-1, lin-13, ncr-2, R05D3.8, cutc-1, pad-2
GO.0098542..defense.response.to.other.organism	0.0270141	0.647123	abf-2, abf-1
GO.0006952..defense.response	0.0225924	0.647123	abu-8, fshr-1, lys-2, dct-17, vit-5, asp-3, pgp-3, tbc-1, skn-1, lin-45, unc-43, elo-2, abf-2, C04F12.1, ikb-1, ced-1, gale-1, sur-2, tir-1, acy-1, C23G10.1, dcr-1
GO.0040018..positive.regulation.of.multicellular.organism.growth	0.0232739	0.647123	clec-1, dpy-11, grd-5, C50F4.12, crm-1, cdt-2, fat-5, ifc-2, pccb-1, wrt-6, glit-1, rpl-25.1, fah-1, adt-2, utx-1, hst-2, sma-5, col-183, grd-3, ell-1, skn-1, sec-10, T26A8.4, npr-22, wrt-3, pis-1, unc-43, nhr-67, leo-1, fat-6, F11A10.5, unc-26, Y39F10B.1, T12C9.7, vps-35, sma-6, ire-1, mop-25.2, orc-2, mdt-8, rict-1, nhr-61, ztf-3, Y23H5A.8, W05F2.4, F27C1.2, trpp-8, lin-35, let-607, unc-14, wdr…
GO.0006281..DNA.repair	0.0222661	0.647123	atl-1, mre-11, dvc-1, rad-50, fan-1, wrn-1, rev-1, smc-6, atm-1, pif-1, xnp-1, him-1, slx-1, let-363, gei-17, uev-3, rtel-1, Y37B11A.2, polq-1, gen-1, chl-1
GO.0018105..peptidyl.serine.phosphorylation	0.0190153	0.647123	pkc-1, par-1, dkf-2, gck-3, pek-1, akt-2, aak-2, egl-4, T11F8.4, unc-43, kin-4, pkc-3, vrk-1, mps-1, mnk-1, M04F3.3, csnk-1, wts-1, ZK507.1, ZK507.3
GO.0006479..protein.methylation	0.0256583	0.647123	utx-1, prmt-3, nos-2, set-2, prmt-5, tlk-1
GO.0060581..cell.fate.commitment.involved.in.pattern.specification	0.0270141	0.647123	aph-1, aph-2
GO.0008144..drug.binding	0.0270141	0.647123	let-363, avr-14
GO.0008134..transcription.factor.binding	0.0209448	0.647123	hlh-13, bar-1, hcf-1, mep-1, dpl-1, dip-2, taf-11.2, wdr-23, sys-1, wrm-1, gei-8
GO.0000126..transcription.factor.TFIIIB.complex	0.0270141	0.647123	brf-1, B0261.1
GO.0007163..establishment.or.maintenance.of.cell.polarity	0.019144	0.647123	par-1, pkc-3, vrk-1, lin-17, par-6, cdh-4, par-3
GO.0030951..establishment.or.maintenance.of.microtubule.cytoskeleton.polarity	0.0270141	0.647123	unc-116, cdk-5
GO.0005044..scavenger.receptor.activity	0.0270141	0.647123	C06B8.7, ced-1
GO.0032045..guanyl.nucleotide.exchange.factor.complex	0.0270141	0.647123	ced-5, ced-12
GO.0007413..axonal.fasciculation	0.0244661	0.647123	pst-1, hst-2, wwp-1, lpd-3, lin-59, let-526, trpp-8, unc-40, capg-1, nmy-2, lem-3, nas-5, T24D1.3, hmr-1, smd-1, rpom-1, sur-2, unc-116, cua-1
GO.0001666..response.to.hypoxia	0.0231249	0.647123	nhr-57, egl-9, ire-1, gcn-2, unc-32
GO.2001235..positive.regulation.of.apoptotic.signaling.pathway	0.0270141	0.647123	R09F10.1, cnt-1
GO.0007266..Rho.protein.signal.transduction	0.0231249	0.647123	gck-1, pak-1, max-2, let-502, pac-1
GO.0005802..trans.Golgi.network	0.019144	0.647123	efa-6, R05D11.9, tat-5, agef-1, tat-1, tpst-1, cua-1
GO.0008105..asymmetric.protein.localization	0.019144	0.647123	pkc-3, spd-5, ppk-1, spd-2, csnk-1, par-3, pac-1
GO.0000014..single.stranded.DNA.endodeoxyribonuclease.activity	0.0270141	0.647123	xpf-1, dna-2
GO.0051213..dioxygenase.activity	0.0192999	0.647123	egl-9, jmjd-1.2, rbr-2, ZK550.6, K07E1.1, hgo-1, tdo-2, hpd-1
GO.1902160..negative.regulation.of.cyclic.nucleotide.gated.ion.channel.activity	0.0270141	0.647123	egl-4, pde-2
GO.0007320..insemination	0.0270141	0.647123	egl-8, swm-1
GO.0007624..ultradian.rhythm	0.0270141	0.647123	flr-1, hipr-1
GO.0000287..magnesium.ion.binding	0.0192647	0.647123	ppm-1, T26C12.1, pyk-2, kin-4, Y10G11A.1, B0334.3, rskn-2, rskn-1, tat-5, F25B5.3, tat-3, tat-1
GO.1903363..negative.regulation.of.cellular.protein.catabolic.process	0.0270141	0.647123	R06F6.8, gei-17
GO.1904333..positive.regulation.of.error.prone.translesion.synthesis	0.0270141	0.647123	gei-17, ulp-1
GO.0045167..asymmetric.protein.localization.involved.in.cell.fate.determination	0.026106	0.647123	rga-3, par-1, eel-1, ect-2, lin-17, nmy-2, wrm-1
GO.0042262..DNA.protection	0.0270141	0.647123	hda-2, hda-3
GO.0003384..apical.constriction.involved.in.gastrulation	0.0270141	0.647123	sax-7, hmr-1
GO.0042147..retrograde.transport..endosome.to.Golgi	0.0231249	0.647123	vps-54, vps-35, R06F6.8, rme-8, vps-53
GO.1902667..regulation.of.axon.guidance	0.0270141	0.647123	hst-2, ebax-1
GO.0090306..spindle.assembly.involved.in.meiosis	0.0270141	0.647123	klp-18, klp-7
GO.0030145..manganese.ion.binding	0.0231249	0.647123	ppm-1, mre-11, dcap-2, K12C11.1, ipgm-1
GO.0032876..negative.regulation.of.DNA.endoreduplication	0.0270141	0.647123	lin-35, lon-1
GO.0047238..glucuronosyl.N.acetylgalactosaminyl.proteoglycan.4.beta.N.acetylgalactosaminyltransferase.activity	0.0270141	0.647123	sqv-5, mig-22
GO.0050510..N.acetylgalactosaminyl.proteoglycan.3.beta.glucuronosyltransferase.activity	0.0270141	0.647123	sqv-5, mig-22
GO.0019217..regulation.of.fatty.acid.metabolic.process	0.0270141	0.647123	nhr-49, mdt-15
GO.0006493..protein.O.linked.glycosylation	0.0270141	0.647123	C15C7.7, ogt-1
GO.0004630..phospholipase.D.activity	0.0270141	0.647123	F09G2.8, pld-1
GO.0003989..acetyl.CoA.carboxylase.activity	0.0270141	0.647123	T28F3.5, pod-2
GO.0032888..regulation.of.mitotic.spindle.elongation	0.0270141	0.647123	ppk-1, csnk-1
GO.0060990..lipid.tube.assembly.involved.in.organelle.fission	0.0270141	0.647123	rme-1, amph-1
GO.0008643..carbohydrate.transport	0.026106	0.647123	swt-1, swt-3, nstp-4, fgt-1, sqv-7, B0361.11, ugtp-1
GO.0005351..sugar.proton.symporter.activity	0.0231249	0.647123	hmit-1.1, hmit-1.2, nstp-4, hmit-1.3, ugtp-1
GO.0035542..regulation.of.SNARE.complex.assembly	0.0270141	0.647123	vps-41, vps-16
GO.0003825..alpha.alpha.trehalose.phosphate.synthase..UDP.forming..activity	0.0270141	0.647123	tps-1, tps-2
GO.0019900..kinase.binding	0.0270141	0.647123	scpl-1, unc-16
GO.0035257..nuclear.hormone.receptor.binding	0.0270141	0.647123	wrm-1, mdt-15
GO.0055038..recycling.endosome.membrane	0.0270141	0.647123	ehbp-1, maa-1
GO.0006491..N.glycan.processing	0.0231249	0.647123	aman-2, mans-2, F10C2.5, C47E12.3, aman-3
GO.0005782..peroxisomal.matrix	0.0270141	0.647123	acox-1, Y75B8A.4
GO.0033522..histone.H2A.ubiquitination	0.0270141	0.647123	spat-3, mig-32
GO.1990126..retrograde.transport..endosome.to.plasma.membrane	0.0270141	0.647123	snx-17, snx-27
GO.0015108..chloride.transmembrane.transporter.activity	0.0270141	0.647123	sulp-4, abts-1
GO.0032228..regulation.of.synaptic.transmission..GABAergic	0.0270141	0.647123	kcc-2, abts-1
GO.0006568..tryptophan.metabolic.process	0.0270141	0.647123	F54D5.7, Y71D11A.3
GO.0046048..UDP.metabolic.process	0.0270141	0.647123	uda-1, ntp-1
GO.0036066..protein.O.linked.fucosylation	0.0270141	0.647123	C15C7.7, pad-2
GO.0046922..peptide.O.fucosyltransferase.activity	0.0270141	0.647123	C15C7.7, pad-2
GO.0006177..GMP.biosynthetic.process	0.0270141	0.647123	T22D1.3, gmps-1
GO.0004611..phosphoenolpyruvate.carboxykinase.activity	0.0270141	0.647123	pck-2, pck-1
GO.0017076..purine.nucleotide.binding	0.0270141	0.647123	pck-2, pck-1
GO.0017108..5.flap.endonuclease.activity	0.0270141	0.647123	slx-1, him-18
GO.0033557..Slx1.Slx4.complex	0.0270141	0.647123	slx-1, him-18
GO.0048257..3.flap.endonuclease.activity	0.0270141	0.647123	slx-1, him-18
GO.0030643..cellular.phosphate.ion.homeostasis	0.0270141	0.647123	gpcp-1, gpcp-2
GO.0046475..glycerophospholipid.catabolic.process	0.0270141	0.647123	gpcp-1, gpcp-2
GO.0047389..glycerophosphocholine.phosphodiesterase.activity	0.0270141	0.647123	gpcp-1, gpcp-2
GO.2001070..starch.binding	0.0270141	0.647123	gpcp-1, gpcp-2
GO.0003951..NAD..kinase.activity	0.0270141	0.647123	Y77E11A.2, Y17G7B.10
GO.0006741..NADP.biosynthetic.process	0.0270141	0.647123	Y77E11A.2, Y17G7B.10
GO.0015377..cation.chloride.symporter.activity	0.0270141	0.647123	kcc-2, nkcc-1
GO.0006680..glucosylceramide.catabolic.process	0.0270141	0.647123	R08F11.1, hpo-13
GO.0004591..oxoglutarate.dehydrogenase..succinyl.transferring..activity	0.0270141	0.647123	ZK836.2, ogdh-1
GO.0033211..adiponectin.activated.signaling.pathway	0.0270141	0.647123	paqr-1, paqr-2
GO.0042562..hormone.binding	0.0270141	0.647123	paqr-1, paqr-2
GO.0046321..positive.regulation.of.fatty.acid.oxidation	0.0270141	0.647123	paqr-1, paqr-2
GO.0006071..glycerol.metabolic.process	0.0270141	0.647123	W02H5.8, R11F4.1
GO.0032217..riboflavin.transporter.activity	0.0270141	0.647123	rft-1, rft-2
GO.0032218..riboflavin.transport	0.0270141	0.647123	rft-1, rft-2
GO.0060465..pharynx.development	0.0281799	0.669665	abu-8, spn-4, sqv-1, rib-1, gei-17, aph-1, nas-5, wts-1, aph-2, wrm-1
GO.0009072..aromatic.amino.acid.family.metabolic.process	0.0292144	0.669665	fah-1, gst-42, pah-1, hpd-1
GO.0004693..cyclin.dependent.protein.serine.threonine.kinase.activity	0.0292144	0.669665	pct-1, cdk-7, cdk-8, cdk-12
GO.0016818..hydrolase.activity..acting.on.acid.anhydrides..in.phosphorus.containing.anhydrides	0.0292144	0.669665	rtel-1, dog-1, isw-1, chl-1
GO.0004003..ATP.dependent.DNA.helicase.activity	0.0292144	0.669665	rtel-1, dog-1, chl-1, xpb-1
GO.0071944..cell.periphery	0.0292144	0.669665	rol-3, par-1, rin-1, tiam-1
GO.0008026..ATP.dependent.helicase.activity	0.0292144	0.669665	wrn-1, rtel-1, dog-1, chl-1
GO.0006635..fatty.acid.beta.oxidation	0.0292144	0.669665	F58F9.7, maoc-1, acox-1, F08A8.4
GO.0043234..protein.complex	0.0292144	0.669665	odr-8, rib-1, R06F6.8, rnp-8
GO.0005086..ARF.guanyl.nucleotide.exchange.factor.activity	0.0292144	0.669665	bris-1, efa-6, Y106G6G.2, agef-1
GO.0032508..DNA.duplex.unwinding	0.0305622	0.694571	C08F8.2, wrn-1, dna-2, pif-1, rtel-1, dog-1, helq-1, chl-1, xpb-1
GO.0008158..hedgehog.receptor.activity	0.0305622	0.694571	ptr-15, ncr-1, ptr-14, ptc-3, ptr-8, ptr-20, ptr-11, ptr-21, ncr-2
GO.0004553..hydrolase.activity..hydrolyzing.O.glycosyl.compounds	0.0314287	0.711225	aman-2, chil-10, aman-1, klo-1, aagr-1, chil-24, aagr-2, chil-13, hex-4, aman-3, klo-2
GO.0005938..cell.cortex	0.0322262	0.726183	rga-3, par-1, ebp-1, ric-8, klp-18, srgp-1, let-99, efa-6, pkc-3, lin-5, ect-2, goa-1, chs-1, nmy-2, csnk-1, par-6, sax-2, par-3, wrm-1, pod-1
GO.0048871..multicellular.organismal.homeostasis	0.0341634	0.726725	F56A4.3, gst-10, mig-22
GO.0097502..mannosylation	0.0341634	0.726725	C14A4.3, pigv-1, bre-3
GO.0007567..parturition	0.0341634	0.726725	sma-5, ras-1, sma-4
GO.0031532..actin.cytoskeleton.reorganization	0.0341634	0.726725	rict-1, ced-12, ced-1
GO.0003857..3.hydroxyacyl.CoA.dehydrogenase.activity	0.0341634	0.726725	hacd-1, ech-9, ech-8
GO.0004653..polypeptide.N.acetylgalactosaminyltransferase.activity	0.0341634	0.726725	gly-10, gly-3, gly-5
GO.0032041..NAD.dependent.histone.deacetylase.activity..H3.K14.specific.	0.0341634	0.726725	hda-6, hda-2, hda-3
GO.0008278..cohesin.complex	0.0341634	0.726725	wapl-1, scc-1, him-1
GO.0006986..response.to.unfolded.protein	0.0341634	0.726725	pek-1, ire-1, gcn-2
GO.0006094..gluconeogenesis	0.0341634	0.726725	pyc-1, pck-2, pck-1
GO.0007099..centriole.replication	0.0341634	0.726725	sas-5, spd-2, sas-4
GO.0007035..vacuolar.acidification	0.0341634	0.726725	vha-7, vha-6, unc-32
GO.0008528..G.protein.coupled.peptide.receptor.activity	0.0341634	0.726725	ZC266.1, fshr-1, gnrr-2
GO.0006865..amino.acid.transport	0.0341634	0.726725	F13H10.3, B0303.11, skat-1
GO.0040012..regulation.of.locomotion	0.034655	0.731331	egl-8, pkc-1, ace-1, jmjd-1.2, dcap-2, nfi-1, sol-1, goa-1, sol-2, tpst-1
GO.0023014..signal.transduction.by.protein.phosphorylation	0.0346113	0.731331	gck-1, gck-3, pak-1, sek-6, drl-1, sma-6, mtk-1
GO.0008270..zinc.ion.binding	0.0352967	0.741929	nhr-106, nhr-131, nhr-132, nhr-90, nhr-190, nas-32, nhr-178, nhr-238, nhr-133, nhr-228, C31B8.8, nhr-57, D2063.1, elt-7, nas-9, nhr-47, nhr-142, nhr-286, C05C8.7, rpm-1, nas-3, AC3.5, nas-21, nas-22, aman-2, nhr-207, nhr-102, nhr-108, nhr-65, nhr-230, F54G2.2, spat-3, aman-1, nhr-33, F54B11.5, nhr-48, nhr-76, nhr-92, nape-2, F49F1.8, set-9, jmjd-1.2, nhr-104, hda-6, T05A12.4, nhr-8, nhr-66, lin-4…
GO.0048489..synaptic.vesicle.transport	0.0354772	0.742786	lnp-1, unc-26, nud-2, unc-116, unc-16, cdk-5
GO.0030334..regulation.of.cell.migration	0.0388404	0.810013	spat-3, bar-1, hst-2, cogc-8, itr-1, nhr-67, mig-32, igdb-2, pld-1, lin-17, unc-40, lrp-1, ced-12, pmr-1, mtm-6
GO.0015171..amino.acid.transmembrane.transporter.activity	0.0447676	0.915669	aat-6, F13H10.3, Y51F10.4, aat-9, Y18D10A.23, R02F2.8, skat-1
GO.0008237..metallopeptidase.activity	0.0443369	0.915669	nas-32, C31B8.8, nas-9, nas-3, AC3.5, nas-21, nas-22, gcp-2.1, nep-4, adt-2, nep-22, C42C1.11, C44B7.11, B0495.7, nep-17, ccpp-1, madd-4, nas-5, toh-1, nas-28, dpy-31, T16G12.1, ymel-1, Y43F4A.1
GO.0016773..phosphotransferase.activity..alcohol.group.as.acceptor	0.0447676	0.915669	atl-1, C56A3.8, C50D2.7, R11F4.1, atm-1, let-363, Y75B8A.24
GO.0008081..phosphoric.diester.hydrolase.activity	0.0447676	0.915669	egl-8, gpcp-1, pde-4, gpcp-2, plc-3, ZC155.4, pde-2
GO.0031098..stress.activated.protein.kinase.signaling.cascade	0.0447676	0.915669	gck-2, gck-1, gck-3, pak-1, sek-6, drl-1, mtk-1
GO.0008286..insulin.receptor.signaling.pathway	0.0458608	0.91687	hlh-13, akt-2, egl-4, aap-1
GO.0007265..Ras.protein.signal.transduction	0.0458608	0.91687	bar-1, lin-45, ksr-2, pac-1
GO.0048365..Rac.GTPase.binding	0.0458608	0.91687	gck-1, pak-1, srgp-1, max-2
GO.0005797..Golgi.medial.cisterna	0.0458608	0.91687	vps-52, gly-13, ugtp-1, tbc-8
GO.0004602..glutathione.peroxidase.activity	0.0458608	0.91687	gpx-5, gpx-4, gpx-6, gpx-8
GO.0016575..histone.deacetylation	0.0458608	0.91687	hda-6, hda-2, sin-3, hda-3
GO.0005768..endosome	0.0466876	0.926435	spe-39, hrg-1, Y34B4A.2, vps-41, chup-1, tat-5, vps-16, vps-53, tat-1
GO.0016788..hydrolase.activity..acting.on.ester.bonds	0.0466876	0.926435	lipl-5, lipl-2, T19B10.8, C41A3.1, fan-1, F13H8.11, F57C2.5, poml-3, F36A2.9
GO.0051301..cell.division	0.0474509	0.934608	sas-5, egl-13, puf-7, let-99, scc-1, lin-23, lin-5, zyg-9, puf-5, puf-6, cdk-7, him-1, cdc-25.1, goa-1, csnk-1, par-6, cpg-1, smc-4, mel-28, par-3, ran-2, cya-1, emb-30, div-1, Y43F4A.1, cdk-5
GO.0004519..endonuclease.activity	0.0474149	0.934608	mre-11, hoe-1, dna-2, slx-1, drsh-1, dcr-1
GO.0046854..phosphatidylinositol.phosphorylation	0.0484878	0.948007	ppk-3, aap-1, let-363, ppk-1, Y75B8A.24
GO.0006338..chromatin.remodeling	0.0484878	0.948007	gfi-1, ada-2, let-526, top-1, isw-1
GO.0005623..cell	0.0511727	0.954443	ftn-1, pkc-1, gpcp-1, C14H10.1, ace-1, Y45F10A.7, puf-3, hke-4.1, dnj-8, gpcp-2, gcn-2, ftn-2, aap-1, C30H7.2, vha-14
GO.0019901..protein.kinase.binding	0.0726857	0.954443	mlk-1, gck-3, mel-11, tpxl-1, aap-1, unc-14, goa-1, nmy-2, spd-2, tir-1, wrm-1
GO.0035014..phosphatidylinositol.3.kinase.regulator.activity	0.164389	0.954443	aap-1
GO.0040024..dauer.larval.development	0.150345	0.954443	soc-1, pkc-1, ncr-1, bar-1, sma-5, daf-18, daf-15, sma-6, aap-1, sma-4, ogt-1, ncr-2
GO.0043551..regulation.of.phosphatidylinositol.3.kinase.activity	0.164389	0.954443	aap-1
GO.0046935..1.phosphatidylinositol.3.kinase.regulator.activity	0.164389	0.954443	aap-1
GO.0003333..amino.acid.transmembrane.transport	0.0566525	0.954443	aat-6, F13H10.3, Y51F10.4, aat-9, Y18D10A.23, R02F2.8, skat-1
GO.0008406..gonad.development	0.160467	0.954443	egl-8, sas-5, bar-1, utx-1, Y41D4A.5, hoe-1, dyci-1, rap-1, daf-15, pxf-1, gon-4, mep-1, mig-38, lex-1, nra-1, hke-4.1, nstp-4, ify-1, pkc-3, vrk-1, ani-2, sqv-7, nos-2, lin-26, cki-2, lin-5, dpl-1, lin-29, ash-2, nhr-61, tpxl-1, lin-17, xnp-1, him-1, let-363, let-526, nath-10, lin-35, knl-2, teg-4, pbrm-1, gon-2, spd-2, lin-41, sqv-5, sys-1, par-6, gale-1, top-1, exoc-8, aex-5, helq-1, npp-9, pa…
GO.0040026..positive.regulation.of.vulval.development	0.142702	0.954443	cdt-2, bar-1, lin-15B, lin-15A, hoe-1, lin-49, gon-4, lin-3, lin-26, lin-29, pbrm-1, gon-2, sur-2, isw-1
GO.0042742..defense.response.to.bacterium	0.092549	0.954443	abf-2, ced-1, tir-1
GO.0050829..defense.response.to.Gram.negative.bacterium	0.0901709	0.954443	lipl-5, elt-7, lys-1, lys-2, dct-17, F35E12.6, F35E12.5, F53C11.1, F53C11.3, dkf-2, pgp-3, grd-3, F08G5.6, maoc-1, abf-2, ikb-1, atf-7
GO.0004713..protein.tyrosine.kinase.activity	0.132553	0.954443	C24G6.2, F09G2.1, svh-2, R11E3.1, W01B6.5, ark-1, K09B11.5, kin-15, kin-16, R05H5.4, F26E4.5, ksr-2, R151.1
GO.0004715..non.membrane.spanning.protein.tyrosine.kinase.activity	0.142474	0.954443	rol-3, R11E3.1, W01B6.5, ark-1, K09B11.5, R05H5.4, F26E4.5
GO.0005102..receptor.binding	0.0554375	0.954443	rol-3, grd-5, bra-1, grd-3, R11E3.1, W01B6.5, ebax-1, ark-1, K09B11.5, R05H5.4, madd-4, F26E4.5
GO.0005515..protein.binding	0.0625822	0.954443	Y50D4A.4, D2063.1, nhr-47, spe-39, srp-6, ftn-1, rpm-1, hum-2, crm-1, egl-9, vps-54, pptr-2, sas-5, T04H1.2, gpa-13, par-1, gck-3, Y69H2.3, Y43F8B.2, rme-6, nck-1, pak-1, mdl-1, F41B4.1, bar-1, vps-52, rme-4, hpo-34, bra-1, meg-2, akt-2, lin-15A, F09C8.2, aak-2, daf-18, nhr-76, Y41D4A.5, ric-8, eel-1, M57.1, sand-1, skn-1, fan-1, dyci-1, lip-1, itr-1, hcf-1, C49H3.6, sax-7, pct-1, T26A8.4, oma-1,…
GO.0007169..transmembrane.receptor.protein.tyrosine.kinase.signaling.pathway	0.0799989	0.954443	rol-3, R11E3.1, W01B6.5, ark-1, K09B11.5, kin-15, R05H5.4, shc-1, F26E4.5
GO.0010212..response.to.ionizing.radiation	0.092549	0.954443	wrn-1, atm-1, fsn-1
GO.0031234..extrinsic.component.of.cytoplasmic.side.of.plasma.membrane	0.0515873	0.954443	rol-3, R11E3.1, W01B6.5, ark-1, K09B11.5, R05H5.4, egl-30, F26E4.5
GO.0038083..peptidyl.tyrosine.autophosphorylation	0.102972	0.954443	rol-3, R11E3.1, W01B6.5, ark-1, K09B11.5, R05H5.4, F26E4.5
GO.0006810..transport	0.0966641	0.954443	abt-4, sid-1, pst-1, spe-39, acd-4, glr-5, vps-54, del-6, scpl-4, folt-1, lgc-44, sulp-4, twk-24, twk-14, C54G10.4, T10C6.6, F57G8.5, pgp-9, hmit-1.1, hmit-1.2, F53H8.3, aqp-7, sec-3, syx-6, cgr-1, hrg-1, mrp-6, vps-41, vps-52, kqt-2, F47E1.2, mrp-4, F41E7.1, R07E3.4, pgp-3, flr-1, acr-12, acr-9, cogc-8, swt-1, lgc-30, lgc-22, inx-7, kcc-2, glt-6, itr-1, sec-10, ocr-2, C47E12.2, F13B12.2, T07G12.…
GO.0006869..lipid.transport	0.142474	0.954443	abt-4, lea-1, vit-5, vit-1, nrf-6, obr-4, obr-1
GO.0016246..RNA.interference	0.114021	0.954443	sid-1, smut-1, sago-1, mut-15, set-33, eri-1, hecd-1, rsd-2, cth-2, lin-5, pgp-11, haf-4, spd-5, mtk-1, haf-9, sin-3, F43G9.3, C04F12.1, hda-3, npp-9, nrde-1, hrde-1, set-2, sumv-1, isw-1, dcr-1, zfp-1, M03C11.3, set-16
GO.0042626..ATPase.activity..coupled.to.transmembrane.movement.of.substances	0.0652664	0.954443	abt-4, pgp-9, mrp-6, mrp-4, pgp-3, Y45F10C.6, pmp-2, pgp-11, haf-4, pgp-2, haf-9, vha-14, mrp-8
GO.0030176..integral.component.of.endoplasmic.reticulum.membrane	0.133484	0.954443	dhcr-7, fat-6, ire-1, F28C6.4, F44B9.5
GO.0042802..identical.protein.binding	0.105349	0.954443	ftn-1, T04H1.2, gst-42, ace-1, T01B11.2, mep-1, ced-3, maoc-1, ftn-2, rme-8, tir-1, him-18, C16A3.10, aldo-1
GO.0045202..synapse	0.0991493	0.954443	egl-8, glr-5, rpm-1, glo-4, ric-7, rig-3, acr-12, acr-9, tbh-1, ace-1, unc-26, ehs-1, pde-4, acr-14, unc-38, avr-14, sol-1, unc-13, dlk-1, fsn-1, acr-21, unc-116, unc-16, cdk-5
GO.0005216..ion.channel.activity	0.101619	0.954443	glr-5, kqt-2, acr-12, acr-9, itr-1, ocr-2, clh-3, acr-14, shw-1, clh-1, kqt-3, unc-38, gon-2, trp-4, nca-2, acr-21
GO.0051932..synaptic.transmission..GABAergic	0.15219	0.954443	unc-43, nud-2, irx-1, cdk-5
GO.0098655..cation.transmembrane.transport	0.0584506	0.954443	catp-3, PDB1.1, acr-9, lgc-30, ZK185.5, K07H8.2, catp-7, catp-6, catp-8, acr-14, unc-38, gon-2, nca-2, acr-21, vha-14, cua-1
GO.0098703..calcium.ion.import.across.plasma.membrane	0.12877	0.954443	acr-12, unc-38
GO.0007268..chemical.synaptic.transmission	0.0779092	0.954443	lnp-1, kcc-2, ehs-1, kcc-3, unc-13, cdk-5
GO.0030036..actin.cytoskeleton.organization	0.133484	0.954443	daam-1, gck-1, pak-1, max-2, fli-1
GO.0006171..cAMP.biosynthetic.process	0.12877	0.954443	acy-3, acy-1
GO.0007188..adenylate.cyclase.modulating.G.protein.coupled.receptor.signaling.pathway	0.10817	0.954443	gpa-1, gpa-13, gpa-14, goa-1, acy-1
GO.0019933..cAMP.mediated.signaling	0.12877	0.954443	acy-3, acy-1
GO.0040013..negative.regulation.of.locomotion	0.164365	0.954443	pde-4, egl-30, goa-1, ocrl-1, acy-1, unc-32
GO.0072375..medium.term.memory	0.12877	0.954443	unc-43, acy-1
GO.0007165..signal.transduction	0.12802	0.954443	egl-8, arrd-22, rga-3, ptr-15, pptr-2, gpa-1, W05B10.4, gpa-13, rme-6, ncr-1, npr-8, ZK1073.1, lin-45, R13H7.2, F35H10.10, npr-22, rap-1, pxf-1, ptr-14, srgp-1, npr-26, ptc-3, F53C3.13, T28D9.3, pde-4, rab-39, plc-3, ptr-8, B0334.6, rab-7, ras-1, ptr-20, ptr-11, ptr-21, egl-30, gpa-14, nmur-4, goa-1, rlbp-1, ikb-1, ocrl-1, rab-18, acy-3, tir-1, tag-325, F09F7.5, B0244.10, B0244.6, T04C9.1, pdfr-1…
GO.0008294..calcium..and.calmodulin.responsive.adenylate.cyclase.activity	0.164389	0.954443	acy-3
GO.0090038..negative.regulation.of.protein.kinase.C.signaling	0.092549	0.954443	ric-8, let-607, acy-3
GO.2000114..regulation.of.establishment.of.cell.polarity	0.092549	0.954443	ric-8, let-607, acy-3
GO.0016614..oxidoreductase.activity..acting.on.CH.OH.group.of.donors	0.13055	0.954443	Y7A5A.1, F15E6.6, F55B11.1
GO.0030199..collagen.fibril.organization	0.164389	0.954443	adt-2
GO.0043652..engulfment.of.apoptotic.cell	0.138714	0.954443	adt-2, Y41D4A.5, dyci-1, ced-5, ced-3, rab-7, lpd-3, jph-1, rme-8, spd-2, sys-1, ced-12, ced-1, agef-1, sax-2, ced-6, F25B5.6, hlh-11
GO.0030421..defecation	0.0554375	0.954443	folt-1, C06H2.7, kqt-2, flr-1, lin-45, itr-1, gon-2, wts-1, sur-2, aex-5, hipr-1, unc-16
GO.0035418..protein.localization.to.synapse	0.120282	0.954443	egl-8, nid-1, unc-26, aex-5
GO.0008188..neuropeptide.receptor.activity	0.164389	0.954443	npr-22
GO.0006979..response.to.oxidative.stress	0.0568435	0.954443	lmd-3, hlh-13, gpx-5, gpx-4, skn-1, hcf-1, gpx-6, dcap-2, pah-1, ctl-2, ctl-1, gpx-8, pmr-1
GO.0036092..phosphatidylinositol.3.phosphate.biosynthetic.process	0.092549	0.954443	atl-1, unc-26, let-363
GO.0043053..dauer.entry	0.1606	0.954443	che-12, dhs-28, sod-3, daf-18, che-10, let-363, che-14, mfb-1, hmr-1
GO.0060259..regulation.of.feeding.behavior	0.0721671	0.954443	ric-8, goa-1
GO.0003700..transcription.factor.activity..sequence.specific.DNA.binding	0.132221	0.954443	nhr-106, nhr-131, nhr-132, nhr-90, nhr-190, nhr-178, nhr-238, nhr-133, nhr-228, nhr-57, elt-7, nhr-47, nhr-142, dmd-7, nhr-286, nhr-207, dmd-10, atfs-1, nhr-102, nhr-108, nhr-65, nhr-230, nhr-33, atf-5, nhr-48, nhr-76, nhr-92, nhr-104, skn-1, nhr-8, nhr-66, nhr-138, nhr-100, Y5F2A.4, nhr-67, nhr-7, nhr-43, nhr-257, ada-2, nfi-1, lin-26, dpl-1, nhr-19, mab-3, zip-3, nhr-61, let-381, let-607, ztf-2…
GO.0006351..transcription..DNA.templated	0.0850342	0.954443	nhr-106, nhr-131, nhr-132, nhr-90, nhr-190, nhr-178, nhr-238, nhr-133, nhr-228, nhr-57, nhr-47, nhr-142, spe-39, mys-1, nhr-286, rpm-1, nhr-207, nhr-102, nhr-108, nhr-65, nhr-230, hlh-13, egl-13, bar-1, nhr-33, nhr-48, mdt-1.2, nhr-76, nhr-92, jmjd-1.2, nhr-104, hda-6, skn-1, nhr-8, nhr-66, lin-49, nhr-138, nhr-100, rbr-2, Y5F2A.4, nhr-67, nhr-7, leo-1, nhr-43, lex-1, nhr-257, mdt-26, nfi-1, lin-…
GO.0006355..regulation.of.transcription..DNA.templated	0.0857478	0.954443	nhr-106, nhr-131, nhr-132, nhr-90, nhr-190, nhr-178, nhr-238, nhr-133, nhr-228, nhr-57, elt-7, nhr-47, nhr-142, dmd-7, spe-39, mys-1, nhr-286, rpm-1, C50F4.12, nhr-207, dmd-10, atfs-1, nhr-102, nhr-108, nhr-65, nhr-230, hlh-13, egl-13, bar-1, F46H5.4, nhr-33, atf-5, nhr-48, mdt-1.2, nhr-76, nhr-92, jmjd-1.2, nhr-104, hda-6, skn-1, nhr-249, nhr-8, nhr-66, lin-49, nhr-138, nhr-100, rbr-2, Y5F2A.4, …
GO.0046685..response.to.arsenic.containing.substance	0.0721671	0.954443	gcs-1, abts-1
GO.0005828..kinetochore.microtubule	0.12877	0.954443	ric-8, lin-5
GO.0031616..spindle.pole.centrosome	0.12877	0.954443	tpxl-1, top-1
GO.0007067..mitotic.nuclear.division	0.116966	0.954443	gck-1, rig-4, unc-43, klp-12, let-99, scc-1, cki-2, lin-5, zyg-9, him-1, cdc-25.1, goa-1, gon-2, smc-4, ran-2, cya-1, cls-3, emb-30, klp-7, Y43F4A.1, klp-19
GO.0016568..chromatin.modification	0.0652664	0.954443	mys-1, jmjd-1.2, hda-6, rbr-2, Y43H11AL.1, hda-2, lin-59, hda-3, spr-5, set-2, K10D2.1, prmt-5, isw-1
GO.0051117..ATPase.binding	0.06673	0.954443	vha-7, vha-6, helq-1, unc-32
GO.0051321..meiotic.cell.cycle	0.0642266	0.954443	gck-1, mre-11, rad-50, gck-3, lin-45, zyg-11, zyg-9, gls-1, ksr-2, met-2, cya-1, emb-30
GO.0002376..immune.system.process	0.13055	0.954443	dkf-2, akt-2, tir-1
GO.0016620..oxidoreductase.activity..acting.on.the.aldehyde.or.oxo.group.of.donors..NAD.or.NADP.as.acceptor	0.133484	0.954443	alh-4, gpd-3, gpd-2, alh-11, alh-9
GO.0006081..cellular.aldehyde.metabolic.process	0.0721671	0.954443	alh-4, alh-9
GO.0005575..cellular_component	0.122792	0.954443	gst-10, T28C12.4, gpcp-1, lin-15B, dcaf-1, R11A8.7, lex-1, gly-10, glb-9, cyp-13A10, gst-5, hrdl-1, clec-87, cpg-1, alh-9, F25B5.5, B0361.4, gei-8, ttr-5, pad-2, nft-1, ctb-1
GO.0007052..mitotic.spindle.organization	0.129529	0.954443	sas-5, cal-6, ify-1, lin-5, tpxl-1, spd-5, goa-1, spd-2, drsh-1, rsa-1, npp-9, wrm-1, rsa-2, klp-19
GO.0007369..gastrulation	0.117145	0.954443	ugt-23, ced-5, pkc-3, hmr-1, par-6, par-3
GO.0034648..histone.demethylase.activity..H3.dimethyl.K4.specific.	0.0721671	0.954443	rbr-2, spr-5
GO.0016874..ligase.activity	0.143146	0.954443	adss-1, rpm-1, pyc-1, gln-1, sur-5, suca-1, eel-1, ufl-1, hecd-1, uba-1, ebax-1, gln-3, T28F3.5, pod-2, gcs-1, gmps-1, wwp-1, rbpl-1, gei-17, F10F2.2, prx-10, F25B5.6, ttll-4, oxi-1
GO.0042787..protein.ubiquitination.involved.in.ubiquitin.dependent.protein.catabolic.process	0.138077	0.954443	eel-1, tag-349, cul-4, wwp-1, Y119C1B.5, C27A12.7, H05L14.2, lin-41, hrdl-1, C09E7.7, oxi-1
GO.0007219..Notch.signaling.pathway	0.0655216	0.954443	C15C7.7, lip-1, aph-1, aph-2, glp-1
GO.0016485..protein.processing	0.117145	0.954443	egl-21, rom-4, cpd-1, aph-1, aph-2, Y75B8A.4
GO.0048599..oocyte.development	0.164365	0.954443	lip-1, oma-1, mep-1, inx-14, goa-1, aph-1
GO.0070765..gamma.secretase.complex	0.12877	0.954443	aph-1, aph-2
GO.0045176..apical.protein.localization	0.06673	0.954443	soap-1, wts-1, apg-1, sel-2
GO.0005912..adherens.junction	0.161151	0.954443	egl-8, srgp-1, tbcd-1, hmr-1, pac-1
GO.0045732..positive.regulation.of.protein.catabolic.process	0.12877	0.954443	sma-6, sma-4
GO.0030139..endocytic.vesicle	0.13055	0.954443	eea-1, mrp-4, lrp-1
GO.0030123..AP.3.adaptor.complex	0.164389	0.954443	apb-3
GO.0040028..regulation.of.vulval.development	0.0964655	0.954443	bar-1, lip-1, rbr-2, lin-17, sel-2, set-16
GO.0016627..oxidoreductase.activity..acting.on.the.CH.CH.group.of.donors	0.106679	0.954443	K09H11.1, dhcr-7, F58F9.7, F54D5.7, dhod-1, acox-1, F08A8.4, acdh-11
GO.0009790..embryo.development	0.164578	0.954443	spn-4, skn-1, zyg-9, wee-1.3, let-502, top-1, cpg-1
GO.0003713..transcription.coactivator.activity	0.142474	0.954443	pqn-51, bar-1, ada-2, taf-11.2, sys-1, wrm-1, mdt-15
GO.0015992..proton.transport	0.0706912	0.954443	hmit-1.1, hmit-1.2, vha-7, nstp-4, T26C5.3, vha-6, hmit-1.3, ugtp-1, unc-32, vha-14
GO.0006665..sphingolipid.metabolic.process	0.163092	0.954443	R08F11.1, asm-3, gba-4, sms-1, gba-1, gba-2, cgt-3, hpo-13
GO.0006685..sphingomyelin.catabolic.process	0.12877	0.954443	asm-3, R05D11.9
GO.0004190..aspartic.type.endopeptidase.activity	0.0964655	0.954443	asp-10, asp-17, asp-14, asp-3, asp-4, imp-3
GO.1904576..response.to.tunicamycin	0.0721671	0.954443	ire-1, xbp-1
GO.0045089..positive.regulation.of.innate.immune.response	0.0721671	0.954443	dkf-2, atf-7
GO.0051019..mitogen.activated.protein.kinase.binding	0.0721671	0.954443	gck-1, atf-7
GO.0006997..nucleus.organization	0.164578	0.954443	sas-5, npp-8, Y10G11A.1, knl-2, capg-1, F55A3.7, npp-9
GO.0016049..cell.growth	0.0721671	0.954443	sma-5, maa-1
GO.0002009..morphogenesis.of.an.epithelium	0.0615503	0.954443	bar-1, sqv-1, sqv-7, lin-17, xnp-1, sqv-5
GO.0007155..cell.adhesion	0.135432	0.954443	scav-1, bar-1, scav-5, scav-4, rig-4, cdh-5, hmr-1, par-6, cdh-4, par-3, mup-4, Y43F4A.1
GO.0016342..catenin.complex	0.0721671	0.954443	bar-1, hmr-1
GO.0034333..adherens.junction.assembly	0.0721671	0.954443	bar-1, tbcd-1
GO.0016831..carboxy.lyase.activity	0.15219	0.954443	odc-1, tag-38, smd-1, Y71D11A.3
GO.0004505..phenylalanine.4.monooxygenase.activity	0.164389	0.954443	pah-1
GO.0004510..tryptophan.5.monooxygenase.activity	0.164389	0.954443	pah-1
GO.0006571..tyrosine.biosynthetic.process	0.164389	0.954443	pah-1
GO.0016714..oxidoreductase.activity..acting.on.paired.donors..with.incorporation.or.reduction.of.molecular.oxygen..reduced.pteridine.as.one.donor..and.incorporation.of.one.atom.of.oxygen	0.164389	0.954443	pah-1
GO.0012501..programmed.cell.death	0.10817	0.954443	itr-1, ced-3, dpl-1, ced-1, ced-6
GO.0016023..cytoplasmic..membrane.bounded.vesicle	0.13055	0.954443	spe-39, catp-6, spe-41
GO.0045138..nematode.male.tail.tip.morphogenesis	0.135039	0.954443	spat-3, uba-1, mig-32, sma-6, hda-2, mab-3, ptr-20, lin-17, mab-31, lin-59, unc-40, sin-3, lin-41, ksr-2, lin-48, sma-4
GO.0004601..peroxidase.activity	0.139829	0.954443	gpx-5, gpx-4, gpx-6, ctl-2, ctl-1, gpx-8
GO.0005871..kinesin.complex	0.0566525	0.954443	klp-18, klp-12, klp-15, nud-2, unc-116, klp-7, klp-19
GO.0008017..microtubule.binding	0.124717	0.954443	ebp-1, klp-18, klp-12, zyg-9, klp-15, nud-2, unc-116, klp-7, klp-19
GO.0030424..axon	0.0570103	0.954443	egl-8, rpm-1, glo-4, egl-9, gpa-13, pak-1, rig-3, ppk-3, bra-1, aak-2, daf-18, dyf-3, pct-1, ebax-1, unc-43, egl-21, ehs-1, casy-1, mpz-1, egl-30, tiam-1, wdr-23, tir-1, sumv-1, unc-16, cdk-5
GO.0006688..glycosphingolipid.biosynthetic.process	0.164389	0.954443	bre-3
GO.0019187..beta.1.4.mannosyltransferase.activity	0.164389	0.954443	bre-3
GO.0009898..cytoplasmic.side.of.plasma.membrane	0.092549	0.954443	daf-18, ced-6, cyk-1
GO.0004518..nuclease.activity	0.0505587	0.954443	mre-11, eri-1, hoe-1, fan-1, xpf-1, slx-1, drsh-1, pqe-1, gen-1, dcr-1
GO.0031047..gene.silencing.by.RNA	0.0964655	0.954443	sid-1, eri-1, rde-11, rde-10, wago-1, dcr-1
GO.0043186..P.granule	0.0511727	0.954443	spn-4, meg-2, oma-1, alg-3, dcap-2, puf-5, ddx-19, glh-4, glh-2, glh-1, wago-1, prg-1, gls-1, pan-1, cid-1
GO.0055037..recycling.endosome	0.0854533	0.954443	rme-1, spe-39, hrg-1, amph-1, rme-8
GO.0097402..neuroblast.migration	0.12877	0.954443	unc-40, cdh-4
GO.0008353..RNA.polymerase.II.carboxy.terminal.domain.kinase.activity	0.092549	0.954443	cdk-7, cdk-8, cdk-12
GO.0009791..post.embryonic.development	0.161151	0.954443	sma-5, lin-3, glh-2, glh-1, sma-4
GO.0010468..regulation.of.gene.expression	0.0857583	0.954443	eel-1, mep-1, elo-2, glh-4, mdt-15, sbp-1, cdk-5
GO.0051222..positive.regulation.of.protein.transport	0.164389	0.954443	cdk-5
GO.1902803..regulation.of.synaptic.vesicle.transport	0.164389	0.954443	cdk-5
GO.0045448..mitotic.cell.cycle..embryonic	0.164389	0.954443	cdk-7
GO.0051726..regulation.of.cell.cycle	0.0779092	0.954443	pct-1, nos-2, cdk-7, lin-35, cdk-8, cdk-12
GO.0000082..G1.S.transition.of.mitotic.cell.cycle	0.0721671	0.954443	cdk-8, wts-1
GO.0003730..mRNA.3.UTR.binding	0.161151	0.954443	puf-9, oma-1, puf-3, fbf-1, puf-6
GO.0030670..phagocytic.vesicle.membrane	0.12877	0.954443	rab-7, ced-1
GO.0031260..pseudopodium.membrane	0.0721671	0.954443	ced-1, spe-41
GO.0034620..cellular.response.to.unfolded.protein	0.164389	0.954443	ced-1
GO.0008234..cysteine.type.peptidase.activity	0.154029	0.954443	cpz-2, cpr-3, cpr-6, R09F10.1, R07E3.1, odr-8, ced-3, Y40H7A.10, F15D4.4, Y65B4A.2, ulp-1
GO.0017124..SH3.domain.binding	0.0721671	0.954443	ced-5, ced-12
GO.0045309..protein.phosphorylated.amino.acid.binding	0.164389	0.954443	ced-6
GO.0008630..intrinsic.apoptotic.signaling.pathway.in.response.to.DNA.damage	0.0600708	0.954443	msh-6, prmt-5, gen-1
GO.0031090..organelle.membrane	0.120282	0.954443	fmo-5, flr-1, rab-7, fmo-3
GO.0031103..axon.regeneration	0.06673	0.954443	mlk-1, svh-2, svh-1, dlk-1
GO.0006911..phagocytosis..engulfment	0.164389	0.954443	ced-12
GO.0060097..cytoskeletal.rearrangement.involved.in.phagocytosis..engulfment	0.164389	0.954443	ced-12
GO.0070064..proline.rich.region.binding	0.164389	0.954443	ced-12
GO.0008544..epidermis.development	0.13055	0.954443	rap-1, pxf-1, lin-26
GO.0055007..cardiac.muscle.cell.differentiation	0.164389	0.954443	pros-1
GO.0050807..regulation.of.synapse.organization	0.092549	0.954443	rpm-1, cima-1, dlk-1
GO.0004484..mRNA.guanylyltransferase.activity	0.164389	0.954443	cel-1
GO.0004651..polynucleotide.5.phosphatase.activity	0.164389	0.954443	cel-1
GO.0010628..positive.regulation.of.gene.expression	0.121904	0.954443	atfs-1, lin-15A, fbf-1, gcn-2, let-363, cel-1, wdr-48
GO.0098507..polynucleotide.5.dephosphorylation	0.164389	0.954443	cel-1
GO.0003724..RNA.helicase.activity	0.0600708	0.954443	glh-4, glh-2, glh-1
GO.0004386..helicase.activity	0.0712146	0.954443	Y108F1.5, C08F8.2, mel-46, wrn-1, ddx-19, dna-2, pif-1, glh-4, xnp-1, glh-2, glh-1, F52B5.3, rtel-1, dog-1, helq-1, ddx-23, isw-1, dcr-1, chl-1
GO.0006972..hyperosmotic.response	0.0779092	0.954443	lea-1, che-12, gck-3, mps-1, sol-1, sol-2
GO.0007224..smoothened.signaling.pathway	0.164389	0.954443	che-14
GO.0015293..symporter.activity	0.0566525	0.954443	glt-6, kcc-3, glt-5, F56F4.3, slc-17.3, slc-17.2, vglu-3
GO.0004861..cyclin.dependent.protein.serine.threonine.kinase.inhibitor.activity	0.0721671	0.954443	cki-2, Y39E4B.6
GO.0071901..negative.regulation.of.protein.serine.threonine.kinase.activity	0.0721671	0.954443	cki-2, Y39E4B.6
GO.1902806..regulation.of.cell.cycle.G1.S.phase.transition	0.12877	0.954443	cki-2, lin-35
GO.0010629..negative.regulation.of.gene.expression	0.0615503	0.954443	pek-1, gcn-2, let-363, fsn-1, pqe-1, met-2
GO.0061063..positive.regulation.of.nematode.larval.development	0.13055	0.954443	atfs-1, dhs-28, gcn-2
GO.0009411..response.to.UV	0.0655216	0.954443	dcap-2, gcn-2, msh-6, him-1, lem-3
GO.0040037..negative.regulation.of.fibroblast.growth.factor.receptor.signaling.pathway	0.164389	0.954443	clr-1
GO.0055059..asymmetric.neuroblast.division	0.0916473	0.954443	par-1, egl-13, mop-25.2, nmy-2
GO.0070491..repressing.transcription.factor.binding	0.164389	0.954443	lsy-22
GO.0051603..proteolysis.involved.in.cellular.protein.catabolic.process	0.0837955	0.954443	T28H10.3, cpz-2, cpr-3, K10C2.1, cpr-6, R09F10.1, R07E3.1, Y16B4A.2, Y40H7A.10, F13D12.6, F15D4.4
GO.0000737..DNA.catabolic.process..endonucleolytic	0.092549	0.954443	nuc-1, lem-3, dcr-1
GO.0004520..endodeoxyribonuclease.activity	0.092549	0.954443	nuc-1, slx-1, lem-3
GO.0045177..apical.part.of.cell	0.0655216	0.954443	lys-1, osm-11, vha-6, par-3, maa-1
GO.0090501..RNA.phosphodiester.bond.hydrolysis	0.13055	0.954443	ire-1, drsh-1, dcr-1
GO.0009650..UV.protection	0.164389	0.954443	csb-1
GO.0017151..DEAD.H.box.RNA.helicase.binding	0.10817	0.954443	mep-1, glh-1, wago-1, rrf-1, pan-1
GO.0004096..catalase.activity	0.0721671	0.954443	ctl-2, ctl-1
GO.0042542..response.to.hydrogen.peroxide	0.0600708	0.954443	gst-10, ctl-2, ctl-1
GO.0004008..copper.exporting.ATPase.activity	0.164389	0.954443	cua-1
GO.0005774..vacuolar.membrane	0.13055	0.954443	catp-6, rab-7, cua-1
GO.0060003..copper.ion.export	0.164389	0.954443	cua-1
GO.0006897..endocytosis	0.142474	0.954443	eea-1, rme-6, lrp-1, tat-5, hipr-1, tat-1, mtm-6
GO.0007041..lysosomal.transport	0.0721671	0.954443	haf-4, haf-9
GO.0045144..meiotic.sister.chromatid.segregation	0.12877	0.954443	dpy-26, capg-1
GO.0005814..centriole	0.13055	0.954443	sas-5, spd-2, sas-4
GO.0005826..actomyosin.contractile.ring	0.164389	0.954443	cyk-1
GO.0030136..clathrin.coated.vesicle	0.12877	0.954443	rme-6, vps-41
GO.0043401..steroid.hormone.mediated.signaling.pathway	0.0693088	0.954443	nhr-106, nhr-131, nhr-132, nhr-90, nhr-190, nhr-178, nhr-238, nhr-133, nhr-228, nhr-57, nhr-47, nhr-142, nhr-286, nhr-207, nhr-102, nhr-108, nhr-65, nhr-230, nhr-33, nhr-48, nhr-76, nhr-92, nhr-104, nhr-249, nhr-8, nhr-66, nhr-138, nhr-100, nhr-67, nhr-7, nhr-43, nhr-257, nhr-19, nhr-61, nhr-62, nhr-49, nhr-81, nhr-80, nhr-6
GO.0031931..TORC1.complex	0.0721671	0.954443	daf-15, let-363
GO.0010753..positive.regulation.of.cGMP.mediated.signaling	0.0721671	0.954443	egl-4, pde-2
GO.0004525..ribonuclease.III.activity	0.0721671	0.954443	drsh-1, dcr-1
GO.0004530..deoxyribonuclease.I.activity	0.164389	0.954443	dcr-1
GO.0030422..production.of.siRNA.involved.in.RNA.interference	0.13055	0.954443	rrf-1, drsh-1, dcr-1
GO.0031050..dsRNA.fragmentation	0.164389	0.954443	dcr-1
GO.0031054..pre.miRNA.processing	0.12877	0.954443	drsh-1, dcr-1
GO.2000636..positive.regulation.of.primary.miRNA.processing	0.164389	0.954443	dcr-1
GO.0004143..diacylglycerol.kinase.activity	0.12877	0.954443	dgk-4, dgk-5
GO.0016812..hydrolase.activity..acting.on.carbon.nitrogen..but.not.peptide..bonds..in.cyclic.amides	0.0721671	0.954443	dhp-1, T12A2.1
GO.0005811..lipid.particle	0.13055	0.954443	his-41, dhs-3, lid-1
GO.1904070..ascaroside.biosynthetic.process	0.0721671	0.954443	dhs-28, acox-1
GO.0003887..DNA.directed.DNA.polymerase.activity	0.0916473	0.954443	pole-2, Y37B11A.2, polq-1, div-1
GO.0045197..establishment.or.maintenance.of.epithelial.cell.apical.basal.polarity	0.092549	0.954443	acs-1, pod-2, lin-26
GO.0048677..axon.extension.involved.in.regeneration	0.164389	0.954443	dlk-1
GO.0048689..formation.of.growth.cone.in.injured.axon	0.164389	0.954443	dlk-1
GO.0043141..ATP.dependent.5.3.DNA.helicase.activity	0.12877	0.954443	dna-2, pif-1
GO.0043142..single.stranded.DNA.dependent.ATPase.activity	0.164389	0.954443	dna-2
GO.0043570..maintenance.of.DNA.repeat.elements	0.12877	0.954443	msh-6, dog-1
GO.0034976..response.to.endoplasmic.reticulum.stress	0.10817	0.954443	dpy-11, C03H12.1, shc-1, C30H7.2, R05D3.9
GO.0042800..histone.methyltransferase.activity..H3.K4.specific.	0.13055	0.954443	ash-2, set-2, set-16
GO.0007529..establishment.of.synaptic.specificity.at.neuromuscular.junction	0.164389	0.954443	dyb-1
GO.0055088..lipid.homeostasis	0.117145	0.954443	K09H11.1, F58F9.7, F54D5.7, acox-1, F08A8.4, acdh-11
GO.0035264..multicellular.organism.growth	0.0655216	0.954443	elo-2, haf-4, haf-9, hrdl-1, cutc-1
GO.0005243..gap.junction.channel.activity	0.10817	0.954443	inx-7, inx-8, inx-17, eat-5, inx-14
GO.0055077..gap.junction.hemi.channel.activity	0.0854533	0.954443	inx-7, inx-8, inx-17, eat-5, inx-14
GO.0005834..heterotrimeric.G.protein.complex	0.161151	0.954443	gpa-1, gpa-13, egl-30, gpa-14, goa-1
GO.0004686..elongation.factor.2.kinase.activity	0.164389	0.954443	efk-1
GO.0004692..cGMP.dependent.protein.kinase.activity	0.164389	0.954443	egl-4
GO.0030308..negative.regulation.of.cell.growth	0.0721671	0.954443	pek-1, egl-4
GO.0046621..negative.regulation.of.organ.growth	0.164389	0.954443	egl-4
GO.0051343..positive.regulation.of.cyclic.nucleotide.phosphodiesterase.activity	0.164389	0.954443	egl-4
GO.0016042..lipid.catabolic.process	0.142474	0.954443	egl-8, lipl-5, F09G2.8, lipl-2, F09B12.3, plc-3, Y54F10AM.8
GO.0048664..neuron.fate.determination	0.164389	0.954443	egl-13
GO.0006518..peptide.metabolic.process	0.13055	0.954443	egl-21, cpd-1, pamn-1
GO.0001664..G.protein.coupled.receptor.binding	0.117145	0.954443	gpa-1, gpa-13, spp-8, egl-30, gpa-14, goa-1
GO.0019001..guanyl.nucleotide.binding	0.10817	0.954443	gpa-1, gpa-13, egl-30, gpa-14, goa-1
GO.0031683..G.protein.beta.gamma.subunit.complex.binding	0.10817	0.954443	gpa-1, gpa-13, egl-30, gpa-14, goa-1
GO.0003958..NADPH.hemoprotein.reductase.activity	0.164389	0.954443	emb-8
GO.0010181..FMN.binding	0.0854533	0.954443	T10B5.8, F17A9.5, F41E6.5, W07E11.1, emb-8
GO.0031145..anaphase.promoting.complex.dependent.catabolic.process	0.164389	0.954443	emb-30
GO.0045933..positive.regulation.of.muscle.contraction	0.164389	0.954443	unc-26
GO.0042389..omega.3.fatty.acid.desaturase.activity	0.164389	0.954443	fat-1
GO.0016720..delta12.fatty.acid.dehydrogenase.activity	0.164389	0.954443	fat-2
GO.0030497..fatty.acid.elongation	0.164389	0.954443	fat-2
GO.0032456..endocytic.recycling	0.0916473	0.954443	rme-1, ehbp-1, rme-4, maa-1
GO.0042759..long.chain.fatty.acid.biosynthetic.process	0.0721671	0.954443	fat-5, fat-6
GO.0007346..regulation.of.mitotic.cell.cycle	0.090681	0.954443	gck-2, gck-1, gck-3, pak-1, sek-6, drl-1, max-2, mtk-1
GO.0032147..activation.of.protein.kinase.activity	0.0615503	0.954443	gck-1, gck-3, pak-1, sek-6, drl-1, mtk-1
GO.0050661..NADP.binding	0.0779092	0.954443	fmo-5, gpd-3, gpd-2, C46H11.2, C01H6.4, fmo-3
GO.0008199..ferric.iron.binding	0.0721671	0.954443	ftn-1, ftn-2
GO.0048681..negative.regulation.of.axon.regeneration	0.12877	0.954443	rpm-1, fsn-1
GO.0048038..quinone.binding	0.12877	0.954443	gas-1, mig-38
GO.0043407..negative.regulation.of.MAP.kinase.activity	0.12877	0.954443	gck-1, lip-1
GO.0060281..regulation.of.oocyte.development	0.164389	0.954443	gck-1
GO.0004357..glutamate.cysteine.ligase.activity	0.164389	0.954443	gcs-1
GO.0004451..isocitrate.lyase.activity	0.164389	0.954443	icl-1
GO.0004474..malate.synthase.activity	0.164389	0.954443	icl-1
GO.0006097..glyoxylate.cycle	0.164389	0.954443	icl-1
GO.0003714..transcription.corepressor.activity	0.13055	0.954443	hda-2, hda-3, gei-8
GO.0016922..ligand.dependent.nuclear.receptor.binding	0.164389	0.954443	gei-8
GO.0033539..fatty.acid.beta.oxidation.using.acyl.CoA.dehydrogenase	0.0964655	0.954443	K09H11.1, F58F9.7, F54D5.7, acox-1, F08A8.4, acdh-11
GO.0052890..oxidoreductase.activity..acting.on.the.CH.CH.group.of.donors..with.a.flavin.as.acceptor	0.0964655	0.954443	K09H11.1, F58F9.7, F54D5.7, acox-1, F08A8.4, acdh-11
GO.0061665..SUMO.ligase.activity	0.164389	0.954443	gei-17
GO.1990466..protein.autosumoylation	0.164389	0.954443	gei-17
GO.0006807..nitrogen.compound.metabolic.process	0.0615503	0.954443	gln-1, W07E11.1, gln-3, upb-1, nit-1, nft-1
GO.0016328..lateral.plasma.membrane	0.0600708	0.954443	sax-7, tbcd-1, glp-1
GO.0032589..neuron.projection.membrane	0.0600708	0.954443	lin-17, sol-1, sol-2
GO.0006835..dicarboxylic.acid.transport	0.12877	0.954443	glt-6, glt-5
GO.0017153..sodium.dicarboxylate.symporter.activity	0.12877	0.954443	glt-6, glt-5
GO.0018243..protein.O.linked.glycosylation.via.threonine	0.0721671	0.954443	gly-3, gly-5
GO.0005992..trehalose.biosynthetic.process	0.0721671	0.954443	tps-1, tps-2
GO.0051781..positive.regulation.of.cell.division	0.164389	0.954443	gon-4
GO.0004365..glyceraldehyde.3.phosphate.dehydrogenase..NAD....phosphorylating..activity	0.12877	0.954443	gpd-3, gpd-2
GO.0010225..response.to.UV.C	0.0721671	0.954443	gst-10, lem-3
GO.0016034..maleylacetoacetate.isomerase.activity	0.164389	0.954443	gst-42
GO.0015197..peptide.transporter.activity	0.12877	0.954443	haf-4, haf-9
GO.0010621..negative.regulation.of.transcription.by.transcription.factor.localization	0.164389	0.954443	hcf-1
GO.0070932..histone.H3.deacetylation	0.0600708	0.954443	hda-6, hda-2, hda-3
GO.0004411..homogentisate.1.2.dioxygenase.activity	0.164389	0.954443	hgo-1
GO.0006570..tyrosine.metabolic.process	0.164389	0.954443	hgo-1
GO.0000138..Golgi.trans.cisterna	0.13055	0.954443	syx-6, vps-52, tbc-8
GO.0070097..delta.catenin.binding	0.164389	0.954443	hmr-1
GO.0072684..mitochondrial.tRNA.3.trailer.cleavage..endonucleolytic	0.164389	0.954443	hoe-1
GO.0004394..heparan.sulfate.2.O.sulfotransferase.activity	0.164389	0.954443	hst-2
GO.0006887..exocytosis	0.0854533	0.954443	sec-3, sec-10, sec-6, exoc-7, sec-8
GO.0030057..desmosome	0.164389	0.954443	ifc-2
GO.0046856..phosphatidylinositol.dephosphorylation	0.092549	0.954443	unc-26, ocrl-1, mtm-3
GO.0030969..mRNA.splicing.via.endonucleolytic.cleavage.and.ligation.involved.in.unfolded.protein.response	0.164389	0.954443	ire-1
GO.1902255..positive.regulation.of.intrinsic.apoptotic.signaling.pathway.by.p53.class.mediator	0.164389	0.954443	ire-1
GO.0016589..NURF.complex	0.164389	0.954443	isw-1
GO.0005220..inositol.1.4.5.trisphosphate.sensitive.calcium.release.channel.activity	0.164389	0.954443	itr-1
GO.0042713..sperm.ejaculation	0.164389	0.954443	itr-1
GO.0007257..activation.of.JUN.kinase.activity	0.12877	0.954443	max-2, unc-16
GO.0046688..response.to.copper.ion	0.092549	0.954443	mlk-1, max-2, cutc-1
GO.0046785..microtubule.polymerization	0.13055	0.954443	zyg-9, tbcd-1, klp-7
GO.0090619..meiotic.spindle.pole	0.164389	0.954443	klp-7
GO.0008569..ATP.dependent.microtubule.motor.activity..minus.end.directed	0.164389	0.954443	klp-15
GO.0004459..L.lactate.dehydrogenase.activity	0.164389	0.954443	ldh-1
GO.0009269..response.to.desiccation	0.164389	0.954443	lea-1
GO.0045947..negative.regulation.of.translational.initiation	0.12877	0.954443	pek-1, ain-2
GO.0031932..TORC2.complex	0.12877	0.954443	rict-1, let-363
GO.0048382..mesendoderm.development	0.092549	0.954443	skn-1, rict-1, let-363
GO.1903935..response.to.sodium.arsenite	0.0721671	0.954443	gcn-2, let-363
GO.0007028..cytoplasm.organization	0.0721671	0.954443	let-607, rme-8
GO.0031129..inductive.cell.cell.signaling	0.164389	0.954443	lin-3
GO.0005844..polysome	0.092549	0.954443	pab-2, rrf-1, gls-1
GO.0030674..protein.binding..bridging	0.13055	0.954443	scpl-1, sec-16, rsa-2
GO.0010085..polarity.specification.of.proximal.distal.axis	0.0600708	0.954443	lin-17, sys-1, wrm-1
GO.0007398..ectoderm.development	0.164389	0.954443	lin-26
GO.0016479..negative.regulation.of.transcription.from.RNA.polymerase.I.promoter	0.164389	0.954443	lin-35
GO.1902807..negative.regulation.of.cell.cycle.G1.S.phase.transition	0.164389	0.954443	lin-35
GO.0001715..ectodermal.cell.fate.specification	0.164389	0.954443	lin-59
GO.0051447..negative.regulation.of.meiotic.cell.cycle	0.164389	0.954443	lip-1
GO.0015918..sterol.transport	0.164389	0.954443	lrp-1
GO.0035091..phosphatidylinositol.binding	0.0854533	0.954443	snx-17, F13E9.1, pld-1, gls-1, snx-27
GO.0051020..GTPase.binding	0.0721671	0.954443	rin-1, vps-41
GO.0000979..RNA.polymerase.II.core.promoter.sequence.specific.DNA.binding	0.164389	0.954443	mab-3
GO.0000987..core.promoter.proximal.region.sequence.specific.DNA.binding	0.092549	0.954443	dmd-7, dmd-10, mab-3
GO.0045807..positive.regulation.of.endocytosis	0.0721671	0.954443	mtm-3, sel-2
GO.1902805..positive.regulation.of.synaptic.vesicle.transport	0.164389	0.954443	mec-15
GO.0005712..chiasma	0.164389	0.954443	mlh-1
GO.0043267..negative.regulation.of.potassium.ion.transport	0.164389	0.954443	mps-1
GO.0045910..negative.regulation.of.DNA.recombination	0.164389	0.954443	msh-6
GO.0050877..neurological.system.process	0.164389	0.954443	msi-1
GO.0043410..positive.regulation.of.MAPK.cascade	0.0721671	0.954443	svh-2, svh-1
GO.0016312..inositol.bisphosphate.phosphatase.activity	0.164389	0.954443	mtm-3
GO.0034594..phosphatidylinositol.trisphosphate.phosphatase.activity	0.164389	0.954443	mtm-3
GO.0007160..cell.matrix.adhesion	0.092549	0.954443	nid-1, B0393.5, K03H1.5
GO.0030301..cholesterol.transport	0.0721671	0.954443	ncr-1, ncr-2
GO.0008273..calcium..potassium.sodium.antiporter.activity	0.164389	0.954443	ncx-4
GO.0030955..potassium.ion.binding	0.0721671	0.954443	pyk-2, ncx-4
GO.0031402..sodium.ion.binding	0.164389	0.954443	ncx-4
GO.0047710..bis.5.adenosyl..triphosphatase.activity	0.164389	0.954443	nft-1
GO.0035211..spermathecum.morphogenesis	0.164389	0.954443	nhr-6
GO.0060278..regulation.of.ovulation	0.164389	0.954443	nhr-6
GO.0036003..positive.regulation.of.transcription.from.RNA.polymerase.II.promoter.in.response.to.stress	0.164389	0.954443	nhr-49
GO.0045923..positive.regulation.of.fatty.acid.metabolic.process	0.164389	0.954443	nhr-80
GO.0070938..contractile.ring	0.164389	0.954443	nmy-2
GO.0006541..glutamine.metabolic.process	0.06673	0.954443	asns-2, gmps-1, glna-1, F10F2.2
GO.0015914..phospholipid.transport	0.06673	0.954443	tat-5, F15D3.6, tat-3, tat-1
GO.0006596..polyamine.biosynthetic.process	0.0721671	0.954443	odc-1, smd-1
GO.0005977..glycogen.metabolic.process	0.0600708	0.954443	H18N23.2, Y67D8A.2, ogt-1
GO.0006112..energy.reserve.metabolic.process	0.164389	0.954443	ogt-1
GO.0016262..protein.N.acetylglucosaminyltransferase.activity	0.164389	0.954443	ogt-1
GO.0032035..myosin.II.tail.binding	0.164389	0.954443	par-1
GO.0005923..bicellular.tight.junction	0.0721671	0.954443	tbcd-1, par-6
GO.0004694..eukaryotic.translation.initiation.factor.2alpha.kinase.activity	0.164389	0.954443	pek-1
GO.0010939..regulation.of.necrotic.cell.death	0.164389	0.954443	pek-1
GO.0010998..regulation.of.translational.initiation.by.eIF2.alpha.phosphorylation	0.164389	0.954443	pek-1
GO.0010521..telomerase.inhibitor.activity	0.164389	0.954443	pif-1
GO.0032211..negative.regulation.of.telomere.maintenance.via.telomerase	0.164389	0.954443	pif-1
GO.0044806..G.quadruplex.DNA.unwinding	0.164389	0.954443	pif-1
GO.0051974..negative.regulation.of.telomerase.activity	0.164389	0.954443	pif-1
GO.0004697..protein.kinase.C.activity	0.13055	0.954443	pkc-1, dkf-2, pkc-3
GO.2001024..negative.regulation.of.response.to.drug	0.164389	0.954443	pkc-1
GO.0009395..phospholipid.catabolic.process	0.164389	0.954443	plc-3
GO.0006654..phosphatidic.acid.biosynthetic.process	0.164389	0.954443	pld-1
GO.0048870..cell.motility	0.164389	0.954443	pld-1
GO.0006828..manganese.ion.transport	0.12877	0.954443	pmr-1, spe-41
GO.0015410..manganese.transporting.ATPase.activity	0.164389	0.954443	pmr-1
GO.0051592..response.to.calcium.ion	0.164389	0.954443	pmr-1
GO.0071421..manganese.ion.transmembrane.transport	0.164389	0.954443	pmr-1
GO.0051285..cell.cortex.of.cell.tip	0.164389	0.954443	pod-1
GO.0016307..phosphatidylinositol.phosphate.kinase.activity	0.0721671	0.954443	ppk-3, ppk-1
GO.0016308..1.phosphatidylinositol.4.phosphate.5.kinase.activity	0.164389	0.954443	ppk-1
GO.0004020..adenylylsulfate.kinase.activity	0.164389	0.954443	pps-1
GO.0004781..sulfate.adenylyltransferase..ATP..activity	0.164389	0.954443	pps-1
GO.0050428..3.phosphoadenosine.5.phosphosulfate.biosynthetic.process	0.164389	0.954443	pps-1
GO.0010008..endosome.membrane	0.10817	0.954443	ehbp-1, hrg-1, vps-41, rme-8, vps-53
GO.0016580..Sin3.complex	0.164389	0.954443	sin-3
GO.1902435..regulation.of.male.mating.behavior	0.164389	0.954443	ebax-1
GO.0034583..21U.RNA.binding	0.164389	0.954443	prg-1
GO.0034585..21U.RNA.metabolic.process	0.164389	0.954443	prg-1
GO.0009992..cellular.water.homeostasis	0.164389	0.954443	puf-3
GO.0004736..pyruvate.carboxylase.activity	0.164389	0.954443	pyc-1
GO.0009374..biotin.binding	0.164389	0.954443	pyc-1
GO.0090385..phagosome.lysosome.fusion	0.164389	0.954443	rab-7
GO.0034389..lipid.particle.organization	0.164389	0.954443	rab-18
GO.0030870..Mre11.complex	0.164389	0.954443	rad-50
GO.0034647..histone.demethylase.activity..H3.trimethyl.K4.specific.	0.164389	0.954443	rbr-2
GO.0034721..histone.H3.K4.demethylation..trimethyl.H3.K4.specific	0.164389	0.954443	rbr-2
GO.0030346..protein.phosphatase.2B.binding	0.164389	0.954443	arrd-17
GO.0005663..DNA.replication.factor.C.complex	0.164389	0.954443	rfc-1
GO.0072697..protein.localization.to.cell.cortex	0.164389	0.954443	ric-8
GO.0051223..regulation.of.protein.transport	0.164389	0.954443	rme-6
GO.2000369..regulation.of.clathrin.mediated.endocytosis	0.164389	0.954443	rme-6
GO.0042058..regulation.of.epidermal.growth.factor.receptor.signaling.pathway	0.164389	0.954443	rom-4
GO.0050708..regulation.of.protein.secretion	0.12877	0.954443	rom-4, tom-1
GO.0042176..regulation.of.protein.catabolic.process	0.092549	0.954443	cima-1, wwp-1, sur-2
GO.1990633..mutator.focus	0.164389	0.954443	rrf-1
GO.0030427..site.of.polarized.growth	0.164389	0.954443	sax-2
GO.0090527..actin.filament.reorganization	0.164389	0.954443	sax-2
GO.0030506..ankyrin.binding	0.164389	0.954443	sax-7
GO.0072687..meiotic.spindle	0.12877	0.954443	zyg-9, tpxl-1
GO.0033227..dsRNA.transport	0.0721671	0.954443	sid-1, chup-1
GO.0051033..RNA.transmembrane.transporter.activity	0.0721671	0.954443	sid-1, chup-1
GO.0061408..positive.regulation.of.transcription.from.RNA.polymerase.II.promoter.in.response.to.heat.stress	0.164389	0.954443	skn-1
GO.1900409..positive.regulation.of.cellular.response.to.oxidative.stress	0.164389	0.954443	skn-1
GO.0030307..positive.regulation.of.cell.growth	0.12877	0.954443	sma-5, sma-4
GO.0051457..maintenance.of.protein.location.in.nucleus	0.164389	0.954443	sma-6
GO.0004014..adenosylmethionine.decarboxylase.activity	0.164389	0.954443	smd-1
GO.0006557..S.adenosylmethioninamine.biosynthetic.process	0.164389	0.954443	smd-1
GO.0006597..spermine.biosynthetic.process	0.164389	0.954443	smd-1
GO.0016247..channel.regulator.activity	0.12877	0.954443	sol-1, sol-2
GO.0051968..positive.regulation.of.synaptic.transmission..glutamatergic	0.12877	0.954443	sol-1, sol-2
GO.0033365..protein.localization.to.organelle	0.092549	0.954443	spd-5, rsa-1, rsa-2
GO.0005773..vacuole	0.092549	0.954443	spe-39, T28H10.3, vps-41
GO.0004176..ATP.dependent.peptidase.activity	0.13055	0.954443	C34B2.6, ymel-1, Y75B8A.4
GO.0000706..meiotic.DNA.double.strand.break.processing	0.0721671	0.954443	slx-1, him-18
GO.0048040..UDP.glucuronate.decarboxylase.activity	0.164389	0.954443	sqv-1
GO.0047237..glucuronylgalactosylproteoglycan.4.beta.N.acetylgalactosaminyltransferase.activity	0.164389	0.954443	sqv-5
GO.0005461..UDP.glucuronic.acid.transmembrane.transporter.activity	0.164389	0.954443	sqv-7
GO.0005463..UDP.N.acetylgalactosamine.transmembrane.transporter.activity	0.164389	0.954443	sqv-7
GO.0015787..UDP.glucuronic.acid.transport	0.164389	0.954443	sqv-7
GO.0015789..UDP.N.acetylgalactosamine.transport	0.164389	0.954443	sqv-7
GO.0030729..acetoacetate.CoA.ligase.activity	0.164389	0.954443	sur-5
GO.0009954..proximal.distal.pattern.formation	0.164389	0.954443	sys-1
GO.0022409..positive.regulation.of.cell.cell.adhesion	0.164389	0.954443	srgp-1
GO.0060101..negative.regulation.of.phagocytosis..engulfment	0.0721671	0.954443	srgp-1, tat-1
GO.0000120..RNA.polymerase.I.transcription.factor.complex	0.164389	0.954443	tag-51
GO.1901981..phosphatidylinositol.phosphate.binding	0.164389	0.954443	tag-77
GO.0070508..cholesterol.import	0.164389	0.954443	chup-1
GO.0006882..cellular.zinc.ion.homeostasis	0.12877	0.954443	C14H10.1, hke-4.1
GO.0007525..somatic.muscle.development	0.164389	0.954443	cpna-1
GO.0016050..vesicle.organization	0.164389	0.954443	unc-26
GO.0015379..potassium.chloride.symporter.activity	0.12877	0.954443	kcc-2, kcc-3
GO.0022820..potassium.ion.symporter.activity	0.12877	0.954443	kcc-2, kcc-3
GO.0030897..HOPS.complex	0.0600708	0.954443	vps-39, vps-41, vps-16
GO.0032889..regulation.of.vacuole.fusion..non.autophagic	0.164389	0.954443	vps-16
GO.0004836..tyramine.beta.hydroxylase.activity	0.164389	0.954443	tbh-1
GO.0016715..oxidoreductase.activity..acting.on.paired.donors..with.incorporation.or.reduction.of.molecular.oxygen..reduced.ascorbate.as.one.donor..and.incorporation.of.one.atom.of.oxygen	0.0721671	0.954443	tbh-1, pamn-1
GO.0003918..DNA.topoisomerase.type.II..ATP.hydrolyzing..activity	0.12877	0.954443	top-1, R05D3.12
GO.0019563..glycerol.catabolic.process	0.0721671	0.954443	R11F4.1, T25G3.4
GO.0003721..telomerase.RNA.reverse.transcriptase.activity	0.164389	0.954443	trt-1
GO.0003964..RNA.directed.DNA.polymerase.activity	0.164389	0.954443	trt-1
GO.0004839..ubiquitin.activating.enzyme.activity	0.164389	0.954443	uba-1
GO.0019941..modification.dependent.protein.catabolic.process	0.164389	0.954443	uba-1
GO.0050905..neuromuscular.process	0.164389	0.954443	uba-1
GO.0019992..diacylglycerol.binding	0.164389	0.954443	unc-13
GO.0097110..scaffold.protein.binding	0.164389	0.954443	unc-14
GO.0097479..synaptic.vesicle.localization	0.164389	0.954443	unc-14
GO.0005078..MAP.kinase.scaffold.activity	0.164389	0.954443	unc-16
GO.0043194..axon.initial.segment	0.164389	0.954443	unc-16
GO.0043679..axon.terminus	0.164389	0.954443	unc-16
GO.0046328..regulation.of.JNK.cascade	0.164389	0.954443	unc-16
GO.0016185..synaptic.vesicle.budding.from.presynaptic.endocytic.zone.membrane	0.164389	0.954443	unc-26
GO.0016191..synaptic.vesicle.uncoating	0.164389	0.954443	unc-26
GO.0043813..phosphatidylinositol.3.5.bisphosphate.5.phosphatase.activity	0.164389	0.954443	unc-26
GO.0048212..Golgi.vesicle.uncoating	0.164389	0.954443	unc-26
GO.0000220..vacuolar.proton.transporting.V.type.ATPase..V0.domain	0.13055	0.954443	vha-7, vha-6, unc-32
GO.0016471..vacuolar.proton.transporting.V.type.ATPase.complex	0.0600708	0.954443	vha-7, vha-6, unc-32
GO.0070072..vacuolar.proton.transporting.V.type.ATPase.complex.assembly	0.0600708	0.954443	vha-7, vha-6, unc-32
GO.0043235..receptor.complex	0.12877	0.954443	Y45F10C.6, unc-40
GO.0033206..meiotic.cytokinesis	0.164389	0.954443	unc-116
GO.0006896..Golgi.to.vacuole.transport	0.164389	0.954443	vps-54
GO.0043433..negative.regulation.of.sequence.specific.DNA.binding.transcription.factor.activity	0.164389	0.954443	wrm-1
GO.0061031..endodermal.digestive.tract.morphogenesis	0.164389	0.954443	wrm-1
GO.0042592..homeostatic.process	0.164389	0.954443	zig-6
GO.0007051..spindle.organization	0.164389	0.954443	zyg-9
GO.0030730..sequestering.of.triglyceride	0.164389	0.954443	mdt-15
GO.0046620..regulation.of.organ.growth	0.164389	0.954443	wts-1
GO.0048621..post.embryonic.digestive.tract.morphogenesis	0.164389	0.954443	wts-1
GO.0005520..insulin.like.growth.factor.binding	0.164389	0.954443	crm-1
GO.1990269..RNA.polymerase.II.C.terminal.domain.phosphoserine.binding	0.164389	0.954443	leo-1
GO.0007200..phospholipase.C.activating.G.protein.coupled.receptor.signaling.pathway	0.12877	0.954443	ZC266.1, gnrr-2
GO.0031303..integral.component.of.endosome.membrane	0.164389	0.954443	maa-1
GO.0003978..UDP.glucose.4.epimerase.activity	0.164389	0.954443	gale-1
GO.0000110..nucleotide.excision.repair.factor.1.complex	0.164389	0.954443	xpf-1
GO.0006296..nucleotide.excision.repair..DNA.incision..5.to.lesion	0.164389	0.954443	xpf-1
GO.1901255..nucleotide.excision.repair.involved.in.interstrand.cross.link.repair	0.164389	0.954443	xpf-1
GO.0004571..mannosyl.oligosaccharide.1.2.alpha.mannosidase.activity	0.092549	0.954443	mans-2, F10C2.5, C47E12.3
GO.0003995..acyl.CoA.dehydrogenase.activity	0.0779092	0.954443	K09H11.1, F58F9.7, F54D5.7, acox-1, F08A8.4, acdh-11
GO.0080135..regulation.of.cellular.response.to.stress	0.164389	0.954443	wdr-23
GO.0004747..ribokinase.activity	0.164389	0.954443	F07A11.5
GO.0006014..D.ribose.metabolic.process	0.164389	0.954443	F07A11.5
GO.0004642..phosphoribosylformylglycinamidine.synthase.activity	0.164389	0.954443	F10F2.2
GO.0009156..ribonucleoside.monophosphate.biosynthetic.process	0.164389	0.954443	F10F2.2
GO.0031445..regulation.of.heterochromatin.assembly	0.164389	0.954443	lex-1
GO.0031936..negative.regulation.of.chromatin.silencing	0.164389	0.954443	lex-1
GO.0042577..lipid.phosphatase.activity	0.12877	0.954443	F53C3.13, T28D9.3
GO.0004573..mannosyl.oligosaccharide.glucosidase.activity	0.164389	0.954443	mogs-1
GO.0009311..oligosaccharide.metabolic.process	0.164389	0.954443	mogs-1
GO.0017134..fibroblast.growth.factor.binding	0.164389	0.954443	F14E5.2
GO.0006388..tRNA.splicing..via.endonucleolytic.cleavage.and.ligation	0.164389	0.954443	clpf-1
GO.0033215..iron.assimilation.by.reduction.and.transport	0.164389	0.954443	F21D5.3
GO.0033573..high.affinity.iron.permease.complex	0.164389	0.954443	F21D5.3
GO.0031901..early.endosome.membrane	0.164389	0.954443	ehbp-1
GO.0005126..cytokine.receptor.binding	0.164389	0.954443	C44B12.6
GO.1901214..regulation.of.neuron.death	0.164389	0.954443	hrdl-1
GO.0051267..CP2.mannose.ethanolamine.phosphotransferase.activity	0.164389	0.954443	F28C6.4
GO.0030950..establishment.or.maintenance.of.actin.cytoskeleton.polarity	0.164389	0.954443	rict-1
GO.0051897..positive.regulation.of.protein.kinase.B.signaling	0.164389	0.954443	rict-1
GO.0015232..heme.transporter.activity	0.0721671	0.954443	hrg-1, hrg-6
GO.0015886..heme.transport	0.0721671	0.954443	hrg-1, hrg-6
GO.0004012..phospholipid.translocating.ATPase.activity	0.0600708	0.954443	tat-5, tat-3, tat-1
GO.0045332..phospholipid.translocation	0.0600708	0.954443	tat-5, tat-3, tat-1
GO.0004558..alpha.1.4.glucosidase.activity	0.0721671	0.954443	aagr-1, aagr-2
GO.0008131..primary.amine.oxidase.activity	0.164389	0.954443	mig-38
GO.0009308..amine.metabolic.process	0.164389	0.954443	mig-38
GO.0004368..glycerol.3.phosphate.dehydrogenase.activity	0.0721671	0.954443	T25G3.4, gpdh-1
GO.0009331..glycerol.3.phosphate.dehydrogenase.complex	0.0721671	0.954443	T25G3.4, gpdh-1
GO.0004854..xanthine.dehydrogenase.activity	0.0721671	0.954443	F15E6.6, F55B11.1
GO.0004855..xanthine.oxidase.activity	0.164389	0.954443	F55B11.1
GO.0009115..xanthine.catabolic.process	0.0721671	0.954443	F15E6.6, F55B11.1
GO.0016903..oxidoreductase.activity..acting.on.the.aldehyde.or.oxo.group.of.donors	0.0721671	0.954443	F15E6.6, F55B11.1
GO.0033176..proton.transporting.V.type.ATPase.complex	0.164389	0.954443	vha-14
GO.0036442..hydrogen.exporting.ATPase.activity	0.164389	0.954443	vha-14
GO.0051646..mitochondrion.localization	0.164389	0.954443	ric-7
GO.0061544..peptide.secretion..neurotransmission	0.164389	0.954443	ric-7
GO.0051736..ATP.dependent.polyribonucleotide.5.hydroxyl.kinase.activity	0.164389	0.954443	clpf-1
GO.0006046..N.acetylglucosamine.catabolic.process	0.164389	0.954443	F59B2.3
GO.0008448..N.acetylglucosamine.6.phosphate.deacetylase.activity	0.164389	0.954443	F59B2.3
GO.0003841..1.acylglycerol.3.phosphate.O.acyltransferase.activity	0.0721671	0.954443	acl-12, acl-1
GO.0004144..diacylglycerol.O.acyltransferase.activity	0.164389	0.954443	mboa-2
GO.0043550..regulation.of.lipid.kinase.activity	0.164389	0.954443	vacl-14
GO.0070772..PAS.complex	0.164389	0.954443	vacl-14
GO.0044255..cellular.lipid.metabolic.process	0.092549	0.954443	ceeh-2, C09D4.4, ceeh-1
GO.0006004..fucose.metabolic.process	0.0721671	0.954443	C15C7.7, pad-2
GO.0003922..GMP.synthase..glutamine.hydrolyzing..activity	0.164389	0.954443	gmps-1
GO.0004622..lysophospholipase.activity	0.164389	0.954443	ZK370.4
GO.0050290..sphingomyelin.phosphodiesterase.D.activity	0.164389	0.954443	R05D11.9
GO.0034066..RIC1.RGP1.guanyl.nucleotide.exchange.factor.complex	0.164389	0.954443	R06F6.8
GO.0019674..NAD.metabolic.process	0.12877	0.954443	Y77E11A.2, Y17G7B.10
GO.0051303..establishment.of.chromosome.localization	0.164389	0.954443	nud-2
GO.0003919..FMN.adenylyltransferase.activity	0.164389	0.954443	flad-1
GO.0006747..FAD.biosynthetic.process	0.164389	0.954443	flad-1
GO.0008732..L.allo.threonine.aldolase.activity	0.164389	0.954443	R102.4
GO.0016624..oxidoreductase.activity..acting.on.the.aldehyde.or.oxo.group.of.donors..disulfide.as.acceptor	0.12877	0.954443	ZK836.2, ogdh-1
GO.0008889..glycerophosphodiester.phosphodiesterase.activity	0.0600708	0.954443	gpcp-1, gpcp-2, ZC155.4
GO.0004408..holocytochrome.c.synthase.activity	0.164389	0.954443	cchl-1
GO.0052590..sn.glycerol.3.phosphate.ubiquinone.oxidoreductase.activity	0.164389	0.954443	T25G3.4
GO.0052591..sn.glycerol.3.phosphate.ubiquinone.8.oxidoreductase.activity	0.164389	0.954443	T25G3.4
GO.0008521..acetyl.CoA.transporter.activity	0.164389	0.954443	T26C5.3
GO.0015295..solute.proton.symporter.activity	0.164389	0.954443	T26C5.3
GO.0015876..acetyl.CoA.transport	0.164389	0.954443	T26C5.3
GO.0048029..monosaccharide.binding	0.164389	0.954443	clec-49
GO.0015930..glutamate.synthase.activity	0.164389	0.954443	W07E11.1
GO.0016040..glutamate.synthase..NADH..activity	0.164389	0.954443	W07E11.1
GO.0019676..ammonia.assimilation.cycle	0.164389	0.954443	W07E11.1
GO.0045181..glutamate.synthase.activity..NAD.P.H.as.acceptor	0.164389	0.954443	W07E11.1
GO.0000246..delta24.24.1..sterol.reductase.activity	0.164389	0.954443	Y7A5A.1
GO.0008253..5.nucleotidase.activity	0.0721671	0.954443	Y10G11A.1, F25B5.3
GO.0071786..endoplasmic.reticulum.tubular.network.organization	0.164389	0.954443	lnp-1
GO.0048194..Golgi.vesicle.budding	0.164389	0.954443	tat-1
GO.0090217..negative.regulation.of.1.phosphatidylinositol.4.phosphate.5.kinase.activity	0.164389	0.954443	csnk-1
GO.0006478..peptidyl.tyrosine.sulfation	0.164389	0.954443	tpst-1
GO.0008476..protein.tyrosine.sulfotransferase.activity	0.164389	0.954443	tpst-1
GO.0032963..collagen.metabolic.process	0.164389	0.954443	tpst-1
GO.0042276..error.prone.translesion.synthesis	0.12877	0.954443	pole-2, rev-1
GO.0045252..oxoglutarate.dehydrogenase.complex	0.0721671	0.954443	ZK836.2, ogdh-1
GO.0004494..methylmalonyl.CoA.mutase.activity	0.164389	0.954443	mmcm-1
GO.0016866..intramolecular.transferase.activity	0.164389	0.954443	mmcm-1
GO.0001026..TFIIIB.type.transcription.factor.activity	0.164389	0.954443	B0261.1
GO.0004528..phosphodiesterase.I.activity	0.164389	0.954443	fan-1
GO.0010470..regulation.of.gastrulation	0.164389	0.954443	pac-1
GO.0008903..hydroxypyruvate.isomerase.activity	0.164389	0.954443	C05D11.5
GO.0071782..endoplasmic.reticulum.tubular.network	0.164389	0.954443	lnp-1
GO.0097235..positive.regulation.of.fatty.acid.beta.oxidation.by.positive.regulation.of.transcription.from.RNA.polymerase.II.promoter	0.164389	0.954443	nhr-76
GO.0032088..negative.regulation.of.NF.kappaB.transcription.factor.activity	0.164389	0.954443	ufl-1
GO.0004948..calcitonin.receptor.activity	0.164389	0.954443	pdfr-1
GO.0045762..positive.regulation.of.adenylate.cyclase.activity	0.164389	0.954443	pdfr-1
GO.0004587..ornithine.oxo.acid.transaminase.activity	0.164389	0.954443	C16A3.10
GO.0010121..arginine.catabolic.process.to.proline.via.ornithine	0.164389	0.954443	C16A3.10
GO.0019544..arginine.catabolic.process.to.glutamate	0.164389	0.954443	C16A3.10
GO.0032330..regulation.of.chondrocyte.differentiation	0.164389	0.954443	elt-7
GO.0004833..tryptophan.2.3.dioxygenase.activity	0.164389	0.954443	tdo-2
GO.0019441..tryptophan.catabolic.process.to.kynurenine	0.164389	0.954443	tdo-2
GO.0019442..tryptophan.catabolic.process.to.acetyl.CoA	0.164389	0.954443	tdo-2
GO.0004997..thyrotropin.releasing.hormone.receptor.activity	0.164389	0.954443	nmur-4
GO.0017111..nucleoside.triphosphatase.activity	0.164389	0.954443	ntp-1
GO.0043273..CTPase.activity	0.164389	0.954443	ntp-1
GO.0046036..CTP.metabolic.process	0.164389	0.954443	ntp-1
GO.0046039..GTP.metabolic.process	0.164389	0.954443	ntp-1
GO.0043985..histone.H4.R3.methylation	0.164389	0.954443	prmt-5
GO.0044020..histone.methyltransferase.activity..H4.R3.specific.	0.164389	0.954443	prmt-5
GO.0004019..adenylosuccinate.synthase.activity	0.164389	0.954443	adss-1
GO.0046040..IMP.metabolic.process	0.164389	0.954443	adss-1
GO.0004463..leukotriene.A4.hydrolase.activity	0.164389	0.954443	C42C1.11
GO.0019395..fatty.acid.oxidation	0.164389	0.954443	paqr-1
GO.0043843..ADP.specific.glucokinase.activity	0.164389	0.954443	C50D2.7
GO.0019310..inositol.catabolic.process	0.164389	0.954443	C54E4.5
GO.0050113..inositol.oxygenase.activity	0.164389	0.954443	C54E4.5
GO.0003937..IMP.cyclohydrolase.activity	0.164389	0.954443	atic-1
GO.0004643..phosphoribosylaminoimidazolecarboxamide.formyltransferase.activity	0.164389	0.954443	atic-1
GO.0071557..histone.H3.K27.demethylation	0.0721671	0.954443	utx-1, jmjd-1.2
GO.0071558..histone.demethylase.activity..H3.K27.specific.	0.0721671	0.954443	utx-1, jmjd-1.2
GO.0016508..long.chain.enoyl.CoA.hydratase.activity	0.164389	0.954443	maoc-1
GO.0008622..epsilon.DNA.polymerase.complex	0.164389	0.954443	pole-2
GO.0070290..N.acylphosphatidylethanolamine.specific.phospholipase.D.activity	0.0721671	0.954443	F09G2.8, nape-2
GO.0003837..beta.ureidopropionase.activity	0.164389	0.954443	upb-1
GO.0006210..thymine.catabolic.process	0.164389	0.954443	upb-1
GO.0033396..beta.alanine.biosynthetic.process.via.3.ureidopropionate	0.164389	0.954443	upb-1
GO.0061015..snRNA.import.into.nucleus	0.164389	0.954443	F23F1.5
GO.0016846..carbon.sulfur.lyase.activity	0.164389	0.954443	F25B4.8
GO.0035596..methylthiotransferase.activity	0.164389	0.954443	F25B5.5
GO.0004326..tetrahydrofolylpolyglutamate.synthase.activity	0.164389	0.954443	F25B5.6
GO.0046901..tetrahydrofolylpolyglutamate.biosynthetic.process	0.164389	0.954443	F25B5.6
GO.0040036..regulation.of.fibroblast.growth.factor.receptor.signaling.pathway	0.164389	0.954443	vrk-1
GO.0070461..SAGA.type.complex	0.164389	0.954443	ada-2
GO.0033263..CORVET.complex	0.164389	0.954443	vps-41
GO.0042144..vacuole.fusion..non.autophagic	0.164389	0.954443	vps-41
GO.0050921..positive.regulation.of.chemotaxis	0.164389	0.954443	odr-8
GO.0071567..UFM1.hydrolase.activity	0.164389	0.954443	odr-8
GO.0045022..early.endosome.to.late.endosome.transport	0.164389	0.954443	sand-1
GO.0001676..long.chain.fatty.acid.metabolic.process	0.164389	0.954443	cyp-33E2
GO.0000839..Hrd1p.ubiquitin.ligase.ERAD.L.complex	0.164389	0.954443	F44B9.5
GO.0097027..ubiquitin.protein.transferase.activator.activity	0.164389	0.954443	F44B9.5
GO.0015136..sialic.acid.transmembrane.transporter.activity	0.164389	0.954443	cima-1
GO.0015739..sialic.acid.transport	0.164389	0.954443	cima-1
GO.0000827..inositol.1.3.4.5.6.pentakisphosphate.kinase.activity	0.164389	0.954443	F46F11.1
GO.0000832..inositol.hexakisphosphate.5.kinase.activity	0.164389	0.954443	F46F11.1
GO.0033857..diphosphoinositol.pentakisphosphate.kinase.activity	0.164389	0.954443	F46F11.1
GO.0052723..inositol.hexakisphosphate.1.kinase.activity	0.164389	0.954443	F46F11.1
GO.0052724..inositol.hexakisphosphate.3.kinase.activity	0.164389	0.954443	F46F11.1
GO.1990072..TRAPPIII.protein.complex	0.164389	0.954443	trpp-8
GO.0033674..positive.regulation.of.kinase.activity	0.164389	0.954443	shc-1
GO.0004619..phosphoglycerate.mutase.activity	0.164389	0.954443	ipgm-1
GO.0006007..glucose.catabolic.process	0.164389	0.954443	ipgm-1
GO.0005780..extrinsic.component.of.intraperoxisomal.membrane	0.164389	0.954443	F57B10.9
GO.0045033..peroxisome.inheritance	0.164389	0.954443	F57B10.9
GO.0016402..pristanoyl.CoA.oxidase.activity	0.164389	0.954443	F58F9.7
GO.0015758..glucose.transport	0.164389	0.954443	fgt-1
GO.0008623..CHRAC	0.164389	0.954443	athp-2
GO.0016590..ACF.complex	0.164389	0.954443	athp-2
GO.0006949..syncytium.formation	0.164389	0.954443	ani-2
GO.0004334..fumarylacetoacetase.activity	0.164389	0.954443	fah-1
GO.0071076..RNA.3.uridylation	0.164389	0.954443	cid-1
GO.0008970..phosphatidylcholine.1.acylhydrolase.activity	0.164389	0.954443	ipla-1
GO.0031161..phosphatidylinositol.catabolic.process	0.164389	0.954443	ipla-1
GO.0034638..phosphatidylcholine.catabolic.process	0.164389	0.954443	ipla-1
GO.0047499..calcium.independent.phospholipase.A2.activity	0.164389	0.954443	ipla-1
GO.0070300..phosphatidic.acid.binding	0.164389	0.954443	ipla-1
GO.0045835..negative.regulation.of.meiotic.nuclear.division	0.164389	0.954443	met-2
GO.0072325..vulval.cell.fate.commitment	0.164389	0.954443	met-2
GO.0045875..negative.regulation.of.sister.chromatid.cohesion	0.164389	0.954443	wapl-1
GO.0071922..regulation.of.cohesin.loading	0.164389	0.954443	wapl-1
GO.0006919..activation.of.cysteine.type.endopeptidase.activity.involved.in.apoptotic.process	0.164389	0.954443	R09F10.1
GO.0004370..glycerol.kinase.activity	0.164389	0.954443	R11F4.1
GO.0046167..glycerol.3.phosphate.biosynthetic.process	0.164389	0.954443	R11F4.1
GO.1904247..positive.regulation.of.polynucleotide.adenylyltransferase.activity	0.164389	0.954443	rnp-8
GO.1990749..polynucleotide.adenylyltransferase.activator.activity	0.164389	0.954443	rnp-8
GO.0006198..cAMP.catabolic.process	0.164389	0.954443	pde-4
GO.0043951..negative.regulation.of.cAMP.mediated.signaling	0.164389	0.954443	pde-4
GO.0004679..AMP.activated.protein.kinase.activity	0.164389	0.954443	aak-2
GO.0031588..nucleotide.activated.protein.kinase.complex	0.164389	0.954443	aak-2
GO.0032007..negative.regulation.of.TOR.signaling	0.164389	0.954443	aak-2
GO.0004128..cytochrome.b5.reductase.activity..acting.on.NAD.P.H	0.164389	0.954443	hpo-19
GO.0004584..dolichyl.phosphate.mannose.glycolipid.alpha.mannosyltransferase.activity	0.164389	0.954443	pigv-1
GO.0031501..mannosyltransferase.complex	0.164389	0.954443	pigv-1
GO.0072422..signal.transduction.involved.in.DNA.damage.checkpoint	0.164389	0.954443	gen-1
GO.0006091..generation.of.precursor.metabolites.and.energy	0.164389	0.954443	ogdh-1
GO.0003938..IMP.dehydrogenase.activity	0.164389	0.954443	T22D1.3
GO.0004152..dihydroorotate.dehydrogenase.activity	0.164389	0.954443	dhod-1
GO.0004371..glycerone.kinase.activity	0.164389	0.954443	W02H5.8
GO.0023052..signaling	0.164389	0.954443	W03A5.4
GO.1990522..tail.spike.morphogenesis	0.164389	0.954443	paqr-2
GO.0016035..zeta.DNA.polymerase.complex	0.164389	0.954443	Y37B11A.2
GO.0015098..molybdate.ion.transmembrane.transporter.activity	0.164389	0.954443	samt-1
GO.0015689..molybdate.ion.transport	0.164389	0.954443	samt-1
GO.0017116..single.stranded.DNA.dependent.ATP.dependent.DNA.helicase.activity	0.164389	0.954443	helq-1
GO.0001760..aminocarboxymuconate.semialdehyde.decarboxylase.activity	0.164389	0.954443	Y71D11A.3
GO.0000838..Hrd1p.ubiquitin.ligase.ERAD.M.complex	0.164389	0.954443	Y119C1B.5
GO.0055070..copper.ion.homeostasis	0.164389	0.954443	cutc-1
GO.0004123..cystathionine.gamma.lyase.activity	0.164389	0.954443	cth-2
GO.0044540..L.cystine.L.cysteine.lyase..deaminating.	0.164389	0.954443	cth-2
GO.0080146..L.cysteine.desulfhydrase.activity	0.164389	0.954443	cth-2
GO.0072661..protein.targeting.to.plasma.membrane	0.164389	0.954443	tag-232
GO.0005813..centrosome	0.166074	0.962074	rga-3, ebp-1, dyf-3, oma-1, zyg-9, tpxl-1, spd-5, nud-2, sys-1, rsa-1, klp-7, rsa-2
GO.0006820..anion.transport	0.170871	0.988782	T10C6.6, cima-1, C39E9.7, slc-17.4, F41C3.2, W04C9.6, abts-1, slc-17.3, slc-17.2, vglu-2, vglu-3
GO.0050919..negative.chemotaxis	0.172894	0.992928	daf-18, egl-30, smp-1
GO.0051276..chromosome.organization	0.172894	0.992928	smc-6, him-1, smc-4
GO.0030703..eggshell.formation	0.172894	0.992928	chs-1, cpg-1, emb-8
GO.0051568..histone.H3.K4.methylation	0.172894	0.992928	ash-2, set-2, set-16
GO.0031462..Cul2.RING.ubiquitin.ligase.complex	0.172894	0.992928	ebax-1, lrr-1, zyg-11
GO.0030010..establishment.of.cell.polarity	0.172894	0.992928	par-1, rict-1, par-3
GO.0033179..proton.transporting.V.type.ATPase..V0.domain	0.172894	0.992928	vha-7, vha-6, unc-32
GO.0005942..phosphatidylinositol.3.kinase.complex	0.416563	1	aap-1
GO.0015179..L.amino.acid.transmembrane.transporter.activity	0.610624	1	aat-6, aat-9
GO.0015297..antiporter.activity	0.694991	1	aat-6, nhx-6, aat-9
GO.0015807..L.amino.acid.transport	0.610624	1	aat-6, aat-9
GO.1902475..L.alpha.amino.acid.transmembrane.transport	0.655618	1	aat-6, aat-9
GO.1990184..amino.acid.transport.complex	1	1	NA
GO.0009986..cell.surface	0.694991	1	wrt-6, aat-9, ced-1
GO.0000003..reproduction	0.90341	1	egl-8, adss-1, rga-3, cpi-2, alh-4, acs-1, syx-18, mys-1, C05C8.7, grl-10, F45F2.10, his-6, gck-1, his-41, ehbp-1, crm-1, pap-1, scpl-4, folt-1, C06H2.7, dvc-1, mam-4, sas-5, frm-10, F25H9.6, C56A3.8, par-1, ZC376.6, rfc-1, cdt-2, C25D7.10, B0391.10, F53E4.1, Y69H2.3, B0250.7, dhcr-7, Y73B3A.18, cal-6, T08D2.5, set-33, Y102A11A.3, lsy-2, rpl-11.2, vit-5, spat-3, glit-1, rpl-25.1, egl-13, fah-1, e…
GO.0000278..mitotic.cell.cycle	0.416563	1	gon-2
GO.0002119..nematode.larval.development	0.989678	1	egl-8, Y61A9LA.5, prx-6, clec-1, pst-1, mrck-1, alh-4, hpo-19, acs-1, syx-18, mys-1, soap-1, C05C8.7, his-6, glo-4, C50F4.12, his-41, pap-1, pptr-2, dvc-1, frm-10, F25H9.6, C56A3.8, ZC376.6, rfc-1, B0391.10, fbxa-207, B0250.7, dhcr-7, Y73B3A.18, set-33, lsy-2, rpl-11.2, cgr-1, nck-1, hlh-13, rpl-25.1, vps-41, pak-1, fah-1, his-38, adt-2, eef-1A.2, W07E11.1, pek-1, sma-5, cytb-5.1, gas-1, lin-15B,…
GO.0009792..embryo.development.ending.in.birth.or.egg.hatching	0.715366	1	egl-8, R05D8.7, rft-1, rft-2, Y61A9LA.5, adss-1, nas-9, pqn-51, rga-3, pst-1, rme-1, mrck-1, F31F7.1, sago-1, alh-4, hpo-19, T05H4.15, acs-1, mtl-1, spn-4, mys-1, C05C8.7, ftn-1, grl-10, rol-3, T23B12.6, F45F2.10, his-6, grd-5, glo-4, F44A2.3, K07B1.4, H24G06.1, C50F4.12, his-41, atl-1, fshr-1, pap-1, scpl-4, mre-11, pptr-2, T19B10.8, sas-5, col-158, rad-50, T28H10.3, R186.1, him-17, C56A3.8, vps…
GO.0040011..locomotion	0.498789	1	F33E11.3, Y61A9LA.5, adss-1, clec-1, mrck-1, dpy-11, acs-1, syx-18, soap-1, rol-3, his-6, grd-5, rpm-1, C50F4.12, his-41, ehbp-1, pap-1, ZC376.6, cdt-2, Y102A5C.35, Y69H2.3, B0250.7, dhcr-7, ifc-2, lsy-2, pccb-1, sec-3, wrt-6, hlh-13, egl-13, tag-257, puf-9, fah-1, bar-1, adt-2, eef-1A.2, utx-1, F41E7.1, F55F3.2, cytb-5.1, gas-1, B0395.3, osm-11, dsc-4, col-103, Y55F3AM.3, ric-8, grd-3, wapl-1, C…
GO.0040035..hermaphrodite.genitalia.development	0.838967	1	adss-1, clec-1, H24G06.1, pap-1, par-1, cdt-2, Y69H2.3, Y73B3A.18, lsy-2, rpl-25.1, egl-13, bar-1, his-38, utx-1, osm-11, Y55F3AM.3, npp-8, pitr-1, C46A5.5, sec-10, pmk-2, T26A8.4, pole-2, dcaf-1, ebax-1, kdin-1, C08F8.2, nhr-67, leo-1, mep-1, gex-3, scc-1, ify-1, pkc-3, lin-23, cul-4, lin-26, zyg-11, swsn-7, sap-49, zyg-9, dpl-1, aakg-5, ect-2, orc-2, apc-17, lin-29, ash-2, lin-17, K09H9.7, W05F…
GO.0005576..extracellular.region	0.725127	1	nas-32, tig-2, nas-9, grd-5, nas-3, lea-1, crm-1, C35A5.6, nas-21, nas-22, clec-49, chil-10, vit-5, wrt-6, asp-3, vit-1, F09B12.3, ace-1, asm-3, C44B12.6, grd-3, C08G9.2, wrt-3, C50D2.7, chil-24, ins-5, chil-13, abf-2, abf-1, pamn-1, madd-4, nas-5, Y54F10AM.8, toh-1, cpg-1, cah-1, nas-28, dpy-31, ttr-5
GO.0003674..molecular_function	0.323066	1	soap-1, ric-7, gpcp-1, ncr-1, vps-41, lin-15B, lin-15A, tcl-2, dyf-3, dcaf-1, R11A8.7, lex-1, let-99, scl-5, gly-10, glb-9, mab-31, abf-2, aph-1, lin-41, hrdl-1, clec-87, F25B5.5, B0361.4, lin-13, ttr-5, vha-14, pad-2
GO.0031640..killing.of.cells.of.other.organism	0.512495	1	abf-2
GO.0050830..defense.response.to.Gram.positive.bacterium	0.29317	1	lys-1, lys-2, dkf-2, clec-82, clec-52, ftn-2, abf-2
GO.0050832..defense.response.to.fungus	0.500097	1	pkc-3, sma-6, abf-2, tir-1
GO.0000077..DNA.damage.checkpoint	0.801474	1	atl-1
GO.0005737..cytoplasm	0.24887	1	F35F10.1, C17B7.5, C04E12.5, C04E12.10, T20D4.5, T20D4.4, T20D4.3, D2063.1, adss-1, rme-1, mrck-1, F13H6.3, dpy-11, spn-4, spe-39, gck-2, gck-1, AC3.5, egl-9, sas-5, pyc-1, pkc-1, par-1, atfs-1, rin-1, mut-15, dkf-2, gck-3, Y43F8B.2, ifc-2, gpd-3, gpd-2, cgr-1, erp-1, nck-1, hlh-13, puf-9, pak-1, asp-3, bar-1, sur-5, eef-1A.2, sek-6, gst-42, ppk-3, asp-4, pab-2, rgs-10, ZK1073.1, aak-2, lec-9, tc…
GO.0006915..apoptotic.process	0.834948	1	acs-1, grl-10, rpm-1, gck-1, pap-1, ugt-34, dvc-1, rad-50, him-17, C56A3.8, cal-6, vps-41, nuc-1, eel-1, perm-5, oma-1, fem-3, uba-1, T11G6.5, mep-1, inx-8, ced-3, puf-3, ify-1, ani-2, C27H5.4, hda-2, swsn-7, plc-3, ect-2, gst-5, tpxl-1, xnp-1, let-502, let-526, ppk-1, lin-35, pnk-1, knl-2, cdc-25.1, glh-2, let-607, glh-1, inx-14, chs-1, nmy-2, rme-8, tat-5, lin-41, usp-48, hrdl-1, ced-12, ced-1,…
GO.0007283..spermatogenesis	0.43886	1	spe-39, gck-3, fem-3, uba-1, fbf-1, wee-1.3, prg-1, pad-2
GO.0030336..negative.regulation.of.cell.migration	0.512495	1	srgp-1
GO.0042127..regulation.of.cell.proliferation	0.546034	1	egl-8, rol-3, dsl-3, R11E3.1, W01B6.5, ark-1, K09B11.5, Y41E3.11, sap-49, R05H5.4, Y18H1A.9, glh-4, teg-4, usp-48, F26E4.5, rab-18, ddx-23, epg-4, glp-1
GO.0043066..negative.regulation.of.apoptotic.process	0.779931	1	gck-1, vps-41, fsn-1
GO.0043518..negative.regulation.of.DNA.damage.response..signal.transduction.by.p53.class.mediator	0.507566	1	fsn-1, prmt-5
GO.1901075..negative.regulation.of.engulfment.of.apoptotic.cell	0.512495	1	mtm-3
GO.0005215..transporter.activity	0.266164	1	abt-4, sid-1, T10C6.6, aqp-7, F47E1.2, mrp-4, R07E3.4, kcc-2, C47E12.2, T07G12.5, ptr-14, nkcc-1, F10G7.5, kcc-3, F56F4.3, ant-1.2, abts-1, B0303.11, T23G5.2
GO.0040020..regulation.of.meiotic.nuclear.division	0.785221	1	egl-8, dsl-3, Y41E3.11, sap-49, Y18H1A.9, teg-4, usp-48, rab-18, ddx-23, epg-4, glp-1
GO.0030968..endoplasmic.reticulum.unfolded.protein.response	0.347245	1	abu-8, F10C2.5, pek-1, T14G8.3, lin-15B, dsc-4, C47E12.3, ire-1, Y119C1B.5, xbp-1
GO.0001507..acetylcholine.catabolic.process.in.synaptic.cleft	0.301765	1	ace-1
GO.0003990..acetylcholinesterase.activity	0.301765	1	ace-1
GO.0004104..cholinesterase.activity	0.301765	1	ace-1
GO.0006581..acetylcholine.catabolic.process	0.301765	1	ace-1
GO.0030054..cell.junction	0.258967	1	egl-8, glr-5, bar-1, acr-12, acr-9, ace-1, inx-7, inx-8, gex-3, acr-14, inx-17, unc-38, avr-14, eat-5, inx-14, sol-1, hmr-1, dlk-1, par-6, fsn-1, acr-21, mup-4, cutc-1, pac-1
GO.0042135..neurotransmitter.catabolic.process	0.301765	1	ace-1
GO.0043083..synaptic.cleft	0.301765	1	ace-1
GO.0007271..synaptic.transmission..cholinergic	0.353014	1	nid-1, acr-12, acr-9, lgc-30, acr-14, dyb-1, unc-38, goa-1, abts-1, acr-21, unc-32
GO.0042803..protein.homodimerization.activity	0.267806	1	dmd-7, dmd-10, asns-2, sod-3, ipla-1, pmp-2, mab-3, Y17G7B.10, gpdh-1
GO.0035188..hatching	0.465562	1	puf-7, ify-1, zyg-9, puf-5, puf-6, puf-10, ppfr-1, mdt-15, unc-116
GO.0043058..regulation.of.backward.locomotion	0.388212	1	bar-1, unc-26
GO.0046983..protein.dimerization.activity	0.521293	1	hlh-13, mdl-1, B0545.4, lin-23, hlh-11, sbp-1, anoh-1
GO.0050879..multicellular.organismal.movement	1	1	NA
GO.0008241..peptidyl.dipeptidase.activity	1	1	NA
GO.0018991..oviposition	0.553388	1	dpy-11, Y57E12AL.1, catp-3, rpm-1, egl-9, vit-5, mrp-6, egl-13, bar-1, C25A11.10, hst-2, egl-4, wapl-1, sec-10, sqv-1, gon-4, lin-3, nhr-67, fat-6, gex-3, dpy-26, clr-1, dnj-8, sqv-7, zyg-9, lin-29, egl-30, mab-31, lin-59, let-526, trpp-8, unc-40, lin-35, T08B2.11, ipgm-1, goa-1, wdr-23, lin-41, sqv-5, scpl-1, csnk-1, aph-2, sur-2, F01F1.3, cyk-1, C18H2.1, dcr-1, cutc-1, unc-16, pad-2
GO.0018996..molting.cycle..collagen.and.cuticulin.based.cuticle	0.608151	1	nas-32, Y61A9LA.5, pst-1, ptr-15, grd-5, crm-1, nas-21, nas-22, cdt-2, ifc-2, rme-6, pccb-1, wrt-6, adt-2, F41E7.1, grd-3, elo-5, pxf-1, ptr-14, pod-2, ptc-3, F42A8.1, ptr-8, cchl-1, lin-29, rab-7, ptr-20, ptr-11, ptr-21, lrp-1, smgl-1, rme-8, lin-41, cel-1, F55A3.7, top-1, toh-1, pan-1, nas-28, dpy-31, mup-4, pros-1
GO.0003723..RNA.binding	0.998466	1	pap-1, rpl-25.1, puf-9, pab-2, eri-1, Y55F3AM.3, puf-7, R11A8.7, mep-1, puf-3, dcap-2, F23F1.5, fbf-1, nos-2, sap-49, puf-5, ife-5, puf-6, glh-4, tfbm-1, K04F10.1, glh-2, teg-4, glh-1, drsh-1, set-2, C07H6.4, dcr-1, R05D3.8
GO.0003994..aconitate.hydratase.activity	1	1	NA
GO.0005829..cytosol	0.514337	1	ZK836.2, dkf-2, rme-6, pak-1, bar-1, asns-2, egl-4, F15E6.6, ogdh-1, itr-1, uba-1, ebax-1, R102.4, C42C1.11, rsd-2, F55B11.1, ipla-1, pkc-3, R06F6.8, F46F11.1, F36A2.2, smd-1, Y71D11A.3, spe-41, prmt-5, dcr-1, cyld-1, tbc-8
GO.0006099..tricarboxylic.acid.cycle	0.606917	1	icl-1, ZK836.2, suca-1, ogdh-1
GO.0006879..cellular.iron.ion.homeostasis	0.323797	1	ftn-1, ftn-2
GO.0016829..lyase.activity	0.403113	1	icl-1, odc-1, tag-38, cth-1, sqv-1, R102.4, cth-2, cchl-1, pamn-1, cbl-1, smd-1, Y71D11A.3, aldo-1
GO.0051536..iron.sulfur.cluster.binding	0.583243	1	W07E11.1, gas-1, F15E6.6, F55B11.1, rtel-1, F25B5.5
GO.0051539..4.iron..4.sulfur.cluster.binding	0.779931	1	gas-1, rtel-1, F25B5.5
GO.0072350..tricarboxylic.acid.metabolic.process	1	1	NA
GO.0005739..mitochondrion	0.998214	1	icl-1, K09H11.1, F43H9.4, C50F4.12, scpl-4, pyc-1, ZK836.2, ric-7, suca-1, gas-1, sod-3, ogdh-1, hoe-1, skn-1, C08F8.2, R11F4.1, cchl-1, mfn-1, F54D5.7, sfxn-1.4, Y17G7B.10, ctl-2, ctl-1, pif-1, tfbm-1, ant-1.2, dhod-1, T25G3.4, wdr-23, C34B2.6, mmcm-1, C16C10.1, prx-10, rgs-5, F25B5.6, C16A3.10, R05D3.12, F54C8.7, acdh-11, Y48A6B.9, ctb-1
GO.0004889..acetylcholine.activated.cation.selective.channel.activity	0.554781	1	acr-12, acr-9, lgc-30, acr-14, unc-38, acr-21
GO.0005230..extracellular.ligand.gated.ion.channel.activity	0.778615	1	lgc-44, acr-12, acr-9, lgc-30, lgc-22, acr-14, unc-38, avr-14, acr-21
GO.0005231..excitatory.extracellular.ligand.gated.ion.channel.activity	0.301765	1	unc-38
GO.0005622..intracellular	0.515023	1	egl-8, T10B5.8, mlk-1, F17A9.5, rpm-1, tag-232, wdr-5.3, T19B10.8, pkc-1, T04H1.2, rpl-25.1, F46H5.4, M60.7, nuc-1, rme-4, sma-5, acr-12, akt-2, T07A9.14, eel-1, kgb-2, lin-45, dgk-4, rap-1, C53B4.4, pxf-1, kin-4, F11A10.6, Y45F10A.7, F59A6.5, dgk-5, wrn-1, nfi-1, rab-39, plc-3, rab-7, ras-1, W02B8.2, unc-38, F27C1.11, cdc-25.1, unc-13, rskn-1, lin-41, cel-1, tag-68, ksr-2, dlk-1, F22G12.5, rab-1…
GO.0005892..acetylcholine.gated.channel.complex	0.554781	1	acr-12, acr-9, lgc-30, acr-14, unc-38, acr-21
GO.0006811..ion.transport	0.378633	1	acd-4, glr-5, del-6, lgc-44, twk-24, twk-14, kqt-2, F47E1.2, flr-1, acr-12, acr-9, lgc-30, inx-7, kcc-2, itr-1, ocr-2, inx-8, vha-7, nkcc-1, nhx-6, clh-3, kcc-3, acr-14, shw-1, vha-6, mfn-1, sfxn-1.4, clh-1, kqt-3, acd-5, acd-2, inx-17, unc-38, avr-14, eat-5, inx-14, abts-1, gon-2, pmr-1, trp-4, nca-2, acr-21, slc-17.3, B0303.11, unc-32, slc-17.2, vha-14, best-5, vglu-3
GO.0007274..neuromuscular.synaptic.transmission	0.765814	1	lgc-30, unc-38
GO.0015464..acetylcholine.receptor.activity	0.651424	1	acr-12, acr-9, lgc-30, acr-14, acr-21
GO.0035094..response.to.nicotine	0.610624	1	lgc-30, unc-38
GO.0042166..acetylcholine.binding	0.554781	1	acr-12, acr-9, lgc-30, acr-14, unc-38, acr-21
GO.0043005..neuron.projection	0.778615	1	lnp-1, nape-2, unc-43, egl-30, unc-38, unc-14, fsn-1, sumv-1, unc-116
GO.0045211..postsynaptic.membrane	0.407729	1	glr-5, acr-12, acr-9, acr-14, unc-38, sol-1, acr-21
GO.0098662..inorganic.cation.transmembrane.transport	0.512495	1	unc-38
GO.0034220..ion.transmembrane.transport	0.589258	1	glr-5, lgc-44, aqp-7, kqt-2, acr-9, lgc-22, ocr-2, F10G7.5, clh-3, acr-14, sfxn-1.4, clh-1, avr-14, gon-2, nca-2, acr-21
GO.0042995..cell.projection	0.796091	1	egl-8, rpm-1, egl-9, pak-1, dyf-3, pct-1, unc-43, max-2, sumv-1, cdk-5
GO.0000281..mitotic.cytokinesis	0.754047	1	ect-2, nmy-2, cpg-1
GO.0000910..cytokinesis	0.790138	1	sas-5, C34D4.1, ect-2, drsh-1, cyk-1, klp-7
GO.0005200..structural.constituent.of.cytoskeleton	1	1	NA
GO.0005856..cytoskeleton	0.90064	1	sas-5, pkc-1, F57A10.2, C54E10.1, pkc-3, lin-5, zyg-9, mop-25.2, let-502, spd-5, unc-94, K06A5.3, spd-2, mup-4, sas-4, unc-116, hipr-1, cls-3, T05D4.5
GO.0006898..receptor.mediated.endocytosis	0.960745	1	rft-1, rft-2, Y61A9LA.5, adss-1, hpo-19, mys-1, soap-1, C50F4.12, sas-5, frm-10, F25H9.6, rfc-1, cdt-2, C06B8.7, cal-6, bar-1, cytb-5.1, gas-1, hoe-1, dyci-1, itr-1, svh-1, dcaf-1, uba-1, C47E12.2, kdin-1, enpl-1, C08F8.2, leo-1, mig-38, inx-8, M117.3, fat-6, gex-3, fat-2, mel-46, ZK550.4, F23F1.5, ify-1, sec-6, pkc-3, mdt-26, vps-35, fbf-1, lin-23, dnj-8, ada-2, brf-1, rev-1, swsn-7, nrf-6, mel-…
GO.0007517..muscle.organ.development	1	1	NA
GO.0030866..cortical.actin.cytoskeleton.organization	0.801474	1	rga-3
GO.0040007..growth	0.770145	1	clec-1, mtl-1, eef-1A.2, sma-5, Y55F3AM.3, elo-5, itr-1, uba-1, elo-2, wrn-1, epg-5, zfp-2, W05F2.4, let-363, eat-5, lrp-1, par-6, Y87G2A.2, exoc-8, tir-1, emb-8, isw-1, epg-4
GO.0040039..inductive.cell.migration	0.968921	1	ifc-2, pak-1, ufl-1, ced-5, mig-38, gex-3, lin-5, apc-17, max-2, mab-31, cogc-5, sys-1, npp-9, smc-4, unc-32
GO.0071688..striated.muscle.myosin.thick.filament.assembly	0.476537	1	ehbp-1, ric-7, fbxa-114, aman-1, col-103, ebax-1, pyk-2, mon-2, pqn-85, ztf-17, swsn-7, gst-12, F46F11.1, tre-1, T10B11.8, D2030.2, nmy-2, hgo-1, sur-2, trpp-11, ztf-8, mup-4, cutc-1
GO.0005884..actin.filament	1	1	NA
GO.0007111..meiosis.II.cytokinesis	1	1	NA
GO.0005865..striated.muscle.thin.filament	0.83413	1	unc-94
GO.0030033..microvillus.assembly	1	1	NA
GO.0035148..tube.formation	1	1	NA
GO.0097516..microvillar.actin.bundle	1	1	NA
GO.1990357..terminal.web	0.416563	1	unc-94
GO.0004016..adenylate.cyclase.activity	0.933746	1	acy-3, acy-1
GO.0006935..chemotaxis	0.29317	1	egl-8, che-12, pkc-1, egl-4, odr-8, goa-1, acy-1
GO.0007193..adenylate.cyclase.inhibiting.G.protein.coupled.receptor.signaling.pathway	0.416563	1	acy-1
GO.0007614..short.term.memory	0.715619	1	acy-1
GO.0008219..cell.death	0.349955	1	vps-39, Y34B4A.2, ced-3, rab-7, acy-1, vps-16, Y75B8A.24
GO.0009190..cyclic.nucleotide.biosynthetic.process	0.933746	1	acy-3, acy-1
GO.0016849..phosphorus.oxygen.lyase.activity	0.933746	1	acy-3, acy-1
GO.0040017..positive.regulation.of.locomotion	0.206951	1	egl-8, sand-1, ebax-1, dyb-1, egl-30, lrp-1, acy-1, nca-2
GO.0004383..guanylate.cyclase.activity	0.980827	1	acy-3
GO.0006182..cGMP.biosynthetic.process	0.980827	1	acy-3
GO.0007186..G.protein.coupled.receptor.signaling.pathway	0.743563	1	gnrr-5, ZC266.1, fshr-1, gpa-1, frpr-15, gpa-13, gnrr-2, npr-8, ric-8, R13H7.2, F35H10.10, npr-22, srsx-25, npr-26, sro-1, B0334.6, egl-30, lin-17, gpa-14, nmur-4, goa-1, B0244.10, B0244.6, pdfr-1
GO.1900195..positive.regulation.of.oocyte.maturation	1	1	NA
GO.0003779..actin.binding	0.870298	1	daam-1, viln-1, unc-94, vps-16, cyk-1, fli-1, hipr-1, dbn-1
GO.0007613..memory	1	1	NA
GO.0007616..long.term.memory	1	1	NA
GO.0014069..postsynaptic.density	1	1	NA
GO.0051015..actin.filament.binding	0.750419	1	igdb-2, viln-1, unc-94, pod-1
GO.0051016..barbed.end.actin.filament.capping	1	1	NA
GO.0097120..receptor.localization.to.synapse	0.659644	1	nra-1
GO.2000249..regulation.of.actin.cytoskeleton.reorganization	1	1	NA
GO.0004222..metalloendopeptidase.activity	0.283047	1	nas-32, C31B8.8, nas-9, nas-3, nas-21, nas-22, nep-4, adt-2, nep-22, nep-17, nas-5, toh-1, nas-28, dpy-31, ymel-1, Y43F4A.1
GO.0007229..integrin.mediated.signaling.pathway	1	1	NA
GO.0022401..negative.adaptation.of.signaling.pathway	1	1	NA
GO.0046959..habituation	0.388212	1	tom-1, klp-15
GO.0004000..adenosine.deaminase.activity	0.512495	1	C06G3.5
GO.0005634..nucleus	0.78716	1	nhr-106, nhr-131, nhr-132, nhr-90, nhr-190, nhr-178, nhr-238, nhr-133, nhr-228, nhr-57, elt-7, nhr-47, nhr-142, dmd-7, spn-4, mys-1, nhr-286, rpm-1, his-41, atl-1, pap-1, egl-9, mre-11, saeg-1, dvc-1, nhr-207, rad-50, dmd-10, atfs-1, rfc-1, cdt-2, nhr-102, nhr-108, gck-3, nhr-65, nhr-230, nck-1, hlh-13, egl-13, bar-1, sur-5, his-38, nuc-1, nhr-33, gei-3, bra-1, atf-5, nhr-48, lin-15B, lin-15A, md…
GO.0006382..adenosine.to.inosine.editing	1	1	NA
GO.0006396..RNA.processing	0.809777	1	Y108F1.5, F52B5.3, drsh-1, C07H6.4, dcr-1
GO.0022626..cytosolic.ribosome	1	1	NA
GO.0048477..oogenesis	0.380414	1	gck-1, pap-1, folt-1, C06H2.7, dvc-1, puf-7, perm-5, lin-45, oma-1, fem-3, uba-1, Y41E3.1, ani-2, nos-2, C27H5.4, puf-5, wee-1.3, apc-17, puf-6, puf-10, tpxl-1, let-502, rme-8, gls-1, sqv-5, top-1, emb-8, mdt-15, T12A2.7, thoc-2, unc-32, pod-1
GO.0006397..mRNA.processing	0.979008	1	Y55F3AM.3, sap-49, ire-1, cel-1, clpf-1, T12A2.7
GO.0008609..alkylglycerone.phosphate.synthase.activity	1	1	NA
GO.0008610..lipid.biosynthetic.process	0.592658	1	emb-8
GO.0008611..ether.lipid.biosynthetic.process	1	1	NA
GO.0071949..FAD.binding	1	1	NA
GO.0008361..regulation.of.cell.size	0.257726	1	adt-2, let-607
GO.0010171..body.morphogenesis	0.201758	1	clec-1, mrck-1, dpy-11, mys-1, rpm-1, H24G06.1, pap-1, ifc-2, adt-2, hpo-34, col-183, drl-1, C02B10.5, sand-1, C01B10.11, nhr-8, F33D4.6, sec-10, F20D12.2, pole-2, kdin-1, leo-1, F11A10.5, gex-3, dpy-26, ZK550.4, pqn-85, C27D9.1, pkc-3, clr-1, mdt-26, sma-6, ani-2, lin-23, ada-2, lin-26, lin-5, swsn-7, nrf-6, zyg-9, F42A8.1, orc-2, vha-6, mdt-8, rab-7, let-502, let-526, F27C1.2, klp-15, trpp-8, l…
GO.0004871..signal.transducer.activity	0.34249	1	egl-8, gpa-1, gpa-13, bar-1, npr-8, R13H7.2, F35H10.10, npr-22, npr-26, plc-3, B0334.6, egl-30, gpa-14, nmur-4, goa-1, B0244.10, B0244.6, pdfr-1
GO.0014057..positive.regulation.of.acetylcholine.secretion..neurotransmission	0.388212	1	egl-8, egl-30
GO.0016079..synaptic.vesicle.exocytosis	0.191841	1	pkc-1, unc-13
GO.0030163..protein.catabolic.process	0.275649	1	egl-8, rol-3, egl-9, asp-10, asp-17, egl-13, asp-14, asp-3, asp-4, F54B11.5, egl-4, itr-1, oma-1, ced-3, unc-26, egl-30, tpxl-1, unc-40, unc-94, C34B2.6, aex-5, mup-4, unc-116, unc-32, Y75B8A.4
GO.0060179..male.mating.behavior	0.592658	1	itr-1
GO.0004930..G.protein.coupled.receptor.activity	0.741889	1	gnrr-5, ZC266.1, fshr-1, frpr-15, gnrr-2, npr-8, R13H7.2, F35H10.10, npr-22, srsx-25, npr-26, sro-1, B0334.6, lin-17, nmur-4, B0244.10, B0244.6, pdfr-1
GO.0007218..neuropeptide.signaling.pathway	0.984512	1	ZC266.1, pkc-1, gnrr-2, npr-8, npr-22
GO.2000294..positive.regulation.of.defecation	1	1	NA
GO.0007618..mating	1	1	NA
GO.0017112..Rab.guanyl.nucleotide.exchange.factor.activity	0.592658	1	R06F6.8
GO.0004252..serine.type.endopeptidase.activity	0.277026	1	svh-1, rom-4, try-9, C34B2.6, aex-5, Y75B8A.4
GO.0003924..GTPase.activity	0.913135	1	gpa-1, T04H1.2, gpa-13, eef-1A.2, ntp-1, rap-1, rab-7, ras-1, Y48E1B.2, egl-30, gpa-14, goa-1, rab-18
GO.0005525..GTP.binding	0.995861	1	adss-1, gpa-1, gpa-13, pak-1, eef-1A.2, rap-1, rab-39, rab-7, ras-1, Y48E1B.2, egl-30, gpa-14, goa-1, pck-2, cel-1, pck-1, rab-18
GO.0006886..intracellular.protein.transport	0.606221	1	T19B10.8, vps-39, syx-6, vps-41, snx-17, rap-1, vps-35, rab-7, ras-1, exoc-7, imb-1, apb-3, snx-27, apg-1, rab-18, vps-16
GO.0006913..nucleocytoplasmic.transport	0.727848	1	npp-8, rap-1, rab-7, ras-1, rab-18
GO.0007264..small.GTPase.mediated.signal.transduction	0.84633	1	F46H5.4, rap-1, pxf-1, ced-5, rab-39, rab-7, ras-1, F22G12.5, rab-18, epac-1
GO.0008021..synaptic.vesicle	0.694991	1	lnp-1, unc-26, wdr-23
GO.0015031..protein.transport	0.966802	1	spe-39, vps-54, scpl-4, sec-3, vps-41, vps-52, cogc-8, sec-10, rap-1, mon-2, sec-6, vps-35, rab-39, rab-7, ras-1, apb-3, sec-8, pad-1, apg-1, rab-18, vps-16, doxa-1
GO.0030141..secretory.granule	0.416563	1	tom-1
GO.0032402..melanosome.transport	1	1	NA
GO.0042470..melanosome	1	1	NA
GO.0045921..positive.regulation.of.exocytosis	1	1	NA
GO.0090522..vesicle.tethering.involved.in.exocytosis	1	1	NA
GO.1903364..positive.regulation.of.cellular.protein.catabolic.process	1	1	NA
GO.1990504..dense.core.granule.exocytosis	0.191841	1	pkc-1, ric-7
GO.0002250..adaptive.immune.response	1	1	NA
GO.0006954..inflammatory.response	0.301765	1	C44B12.6
GO.0007568..aging	1	1	NA
GO.0007611..learning.or.memory	0.416563	1	daf-18
GO.0014065..phosphatidylinositol.3.kinase.signaling	1	1	NA
GO.0016303..1.phosphatidylinositol.3.kinase.activity	0.257726	1	atl-1, let-363
GO.0030168..platelet.activation	1	1	NA
GO.0031513..nonmotile.primary.cilium	0.998417	1	gpa-13, ocr-2
GO.0035005..1.phosphatidylinositol.4.phosphate.3.kinase.activity	1	1	NA
GO.0046686..response.to.cadmium.ion	0.449732	1	mtl-1, hcf-1
GO.0048015..phosphatidylinositol.mediated.signaling	0.592658	1	Y75B8A.24
GO.0050920..regulation.of.chemotaxis	0.507566	1	daf-18, mps-1
GO.0060326..cell.chemotaxis	1	1	NA
GO.1901047..insulin.receptor.signaling.pathway.involved.in.determination.of.adult.lifespan	1	1	NA
GO.0001965..G.protein.alpha.subunit.binding	0.301765	1	ric-8
GO.0030695..GTPase.regulator.activity	0.715619	1	ced-5
GO.0050790..regulation.of.catalytic.activity	0.79506	1	ced-5, F44B9.5
GO.0003684..damaged.DNA.binding	0.669796	1	scc-1, rev-1, xpf-1, msh-6
GO.0003908..methylated.DNA..protein..cysteine.S.methyltransferase.activity	1	1	NA
GO.0006307..DNA.dealkylation.involved.in.DNA.repair	1	1	NA
GO.0016765..transferase.activity..transferring.alkyl.or.aryl..other.than.methyl..groups	1	1	NA
GO.0032259..methylation	0.761187	1	comt-4, prmt-3, pmt-1, ash-2, lin-59, tfbm-1, set-2, prmt-5, Y102E9.2, met-2, set-3, set-16
GO.0001085..RNA.polymerase.II.transcription.factor.binding	0.911379	1	elt-7, gei-17
GO.0001708..cell.fate.specification	0.278548	1	mys-1, egl-13, bar-1, osm-11, dsl-3, skn-1, lin-45, vrk-1, sin-3, glp-1
GO.0003677..DNA.binding	0.348671	1	nhr-106, nhr-131, nhr-132, nhr-90, nhr-190, nhr-178, nhr-238, nhr-133, nhr-228, nhr-57, nhr-47, nhr-142, nhr-286, his-6, his-41, atl-1, saeg-1, dvc-1, pyc-1, nhr-207, rfc-1, nhr-102, nhr-108, nhr-65, nhr-230, hlh-13, egl-13, his-38, nhr-33, nhr-48, lin-15B, nhr-76, nhr-92, nhr-104, skn-1, nhr-8, nhr-66, pole-2, nhr-138, nhr-100, rbr-2, C08F8.2, nhr-67, nhr-7, nhr-43, nhr-257, athp-2, F56D1.1, mdt…
GO.0005667..transcription.factor.complex	0.530573	1	elt-7, mdl-1, dpl-1, tag-68, sma-4
GO.0006366..transcription.from.RNA.polymerase.II.promoter	0.974057	1	elt-7, pqn-51, lin-48, sbp-1
GO.0022008..neurogenesis	1	1	NA
GO.0030522..intracellular.receptor.signaling.pathway	0.83413	1	nhr-8
GO.0035176..social.behavior	1	1	NA
GO.0043565..sequence.specific.DNA.binding	0.232355	1	nhr-106, nhr-131, nhr-132, nhr-90, nhr-190, nhr-178, nhr-238, nhr-133, nhr-228, nhr-57, elt-7, nhr-47, nhr-142, dmd-7, nhr-286, nhr-207, dmd-10, atfs-1, nhr-102, nhr-108, nhr-65, nhr-230, mdl-1, nhr-33, atf-5, nhr-48, nhr-76, nhr-92, nhr-104, skn-1, nhr-8, nhr-66, nhr-138, nhr-100, nhr-67, nhr-7, nhr-43, nhr-257, nfi-1, nhr-19, mab-3, zip-3, nhr-61, let-381, let-607, nhr-62, nhr-49, nhr-81, nhr-8…
GO.0045944..positive.regulation.of.transcription.from.RNA.polymerase.II.promoter	0.327853	1	elt-7, bar-1, his-38, skn-1, nhr-8, nhr-67, lex-1, sma-6, nfi-1, lin-26, lin-59, let-526, rskn-2, nhr-49, sys-1, taf-1, nhr-80, nhr-6, tir-1, atf-7, wrm-1, isw-1, pros-1, sbp-1
GO.0090575..RNA.polymerase.II.transcription.factor.complex	0.952876	1	nhr-8
GO.0004874..aryl.hydrocarbon.receptor.activity	1	1	NA
GO.0007399..nervous.system.development	0.907781	1	spn-4, pak-1, lin-5, max-2, hmr-1, smp-1, tir-1, cdk-5
GO.0007416..synapse.assembly	0.861417	1	lnp-1
GO.0007610..behavior	1	1	NA
GO.0034753..nuclear.aryl.hydrocarbon.receptor.complex	1	1	NA
GO.0071218..cellular.response.to.misfolded.protein	1	1	NA
GO.0000235..astral.microtubule	0.323797	1	ebp-1, tpxl-1
GO.0000780..condensed.nuclear.chromosome..centromeric.region	1	1	NA
GO.0000794..condensed.nuclear.chromosome	0.623126	1	atl-1, dpy-26, smc-6, cid-1, klp-19
GO.0032133..chromosome.passenger.complex	1	1	NA
GO.0032465..regulation.of.cytokinesis	0.592658	1	cpg-1
GO.0035174..histone.serine.kinase.activity	0.416563	1	aak-2
GO.0035404..histone.serine.phosphorylation	0.416563	1	aak-2
GO.0040002..collagen.and.cuticulin.based.cuticle.development	0.236513	1	rol-3, ifc-2, ell-1, bli-6, rap-1, pxf-1, fat-2, scc-1, clr-1, C25H3.7, pah-1, ect-2, ztf-3, let-502, taf-1, npp-9, mtm-3, doxa-1, tpst-1
GO.0051233..spindle.midzone	0.903266	1	lin-5
GO.0090307..mitotic.spindle.assembly	0.257726	1	tpxl-1, rsa-1
GO.1904781..positive.regulation.of.protein.localization.to.centrosome	1	1	NA
GO.0000793..condensed.chromosome	0.725377	1	ify-1, lin-5, smc-4, klp-7
GO.0005694..chromosome	0.525755	1	his-41, dvc-1, scc-1, wrn-1, lin-5, smc-6, him-1, top-1, cdk-12, smc-4, met-2, klp-7, klp-19
GO.0005819..spindle	0.698508	1	ric-8, lin-5, nmy-2, klp-19
GO.0005876..spindle.microtubule	0.83413	1	ify-1
GO.0007059..chromosome.segregation	0.844345	1	him-1, nud-2, top-1
GO.0007126..meiotic.nuclear.division	0.332207	1	rme-1, gck-1, rad-50, sec-3, erp-1, hoe-1, klp-18, srgp-1, lex-1, scc-1, ify-1, C30G12.6, zyg-11, klp-15, cdc-25.1, rsa-1, set-2, thoc-2, dcr-1, rsa-2
GO.0007281..germ.cell.development	0.554933	1	sas-5, vit-5, bar-1, dsc-4, eri-1, hoe-1, puf-7, lip-1, ark-1, Y41E3.11, fbf-1, nos-2, ada-2, sap-49, ddx-19, puf-6, K12C11.1, glh-2, teg-4, glh-1, gls-1, rab-18, hrde-1, pan-1, ddx-23, epg-4, dcr-1, glp-1
GO.0018107..peptidyl.threonine.phosphorylation	0.186857	1	gck-3, akt-2, unc-43, mps-1
GO.0019894..kinesin.binding	0.762391	1	unc-16
GO.0030261..chromosome.condensation	0.715619	1	smc-4
GO.0030496..midbody	1	1	NA
GO.0031991..regulation.of.actomyosin.contractile.ring.contraction	1	1	NA
GO.0045184..establishment.of.protein.localization	0.592658	1	ced-1
GO.0046777..protein.autophosphorylation	0.301873	1	mnk-1, dlk-1, prk-1, tlk-1
GO.0051256..mitotic.spindle.midzone.assembly	1	1	NA
GO.0008092..cytoskeletal.protein.binding	0.903266	1	dyb-1
GO.0016327..apicolateral.plasma.membrane	1	1	NA
GO.0043296..apical.junction.complex	1	1	NA
GO.0044292..dendrite.terminus	1	1	NA
GO.0045216..cell.cell.junction.organization	1	1	NA
GO.0032266..phosphatidylinositol.3.phosphate.binding	0.363154	1	eea-1, ppk-3, aka-1
GO.0005516..calmodulin.binding	0.206951	1	kcnl-4, Y67D8A.2, unc-43, mnk-1, ppk-1, obr-4, nmy-2, efk-1
GO.0042771..intrinsic.apoptotic.signaling.pathway.in.response.to.DNA.damage.by.p53.class.mediator	1	1	NA
GO.0043025..neuronal.cell.body	0.446004	1	gpa-13, kcnl-4, lnp-1, pak-1, ppk-3, aak-2, daf-18, dyf-3, ebax-1, egl-21, vps-35, casy-1, egl-30, enu-3.3, wdr-23, dlk-1, enu-3.2, unc-16, enu-3.6, enu-3.5
GO.0000932..cytoplasmic.mRNA.processing.body	0.773667	1	dcap-2, puf-5, edc-3, panl-2
GO.0003676..nucleic.acid.binding	0.247122	1	smut-1, sago-1, spn-4, ets-6, lsy-2, F54G2.2, H28G03.1, pab-2, lin-15B, B0545.4, eri-1, Y55F3AM.3, F49F1.8, R11A8.7, Y5F2A.4, alg-3, Y55D9A.2, Y105C5A.15, mel-46, F56D1.1, wrn-1, lin-26, ztf-17, sap-49, ddx-19, zfp-2, lin-29, Y57A10A.13, ztf-3, rnp-8, Y48G8AL.10, glh-4, ZK973.1, ppw-2, wago-2, glh-2, pqn-21, teg-4, glh-1, wago-1, ztf-2, prg-1, F52B5.3, rbpl-1, C04F12.1, hpo-24, Y106G6D.7, rtel-1,…
GO.0003725..double.stranded.RNA.binding	0.83413	1	drsh-1
GO.0003727..single.stranded.RNA.binding	0.952876	1	rnp-8
GO.0016892..endoribonuclease.activity..producing.3.phosphomonoesters	1	1	NA
GO.0035068..micro.ribonucleoprotein.complex	1	1	NA
GO.0035196..production.of.miRNAs.involved.in.gene.silencing.by.miRNA	1	1	NA
GO.0035198..miRNA.binding	1	1	NA
GO.0035279..mRNA.cleavage.involved.in.gene.silencing.by.miRNA	1	1	NA
GO.0070551..endoribonuclease.activity..cleaving.siRNA.paired.mRNA	1	1	NA
GO.0070922..small.RNA.loading.onto.RISC	1	1	NA
GO.0090502..RNA.phosphodiester.bond.hydrolysis..endonucleolytic	0.82495	1	ire-1, drsh-1, dcr-1
GO.0004029..aldehyde.dehydrogenase..NAD..activity	0.388212	1	alh-4, alh-9
GO.0006730..one.carbon.metabolic.process	0.83413	1	F25B5.6
GO.0009058..biosynthetic.process	0.370401	1	R02D1.2, C41A3.1, F57C2.5, Y37E3.11, Y47D9A.1, F25B5.6
GO.0009258..10.formyltetrahydrofolate.catabolic.process	1	1	NA
GO.0016155..formyltetrahydrofolate.dehydrogenase.activity	1	1	NA
GO.0016742..hydroxymethyl...formyl..and.related.transferase.activity	1	1	NA
GO.0019145..aminobutyraldehyde.dehydrogenase.activity	0.416563	1	alh-11
GO.0047105..4.trimethylammoniobutyraldehyde.dehydrogenase.activity	0.416563	1	alh-11
GO.0004028..3.chloroallyl.aldehyde.dehydrogenase.activity	0.301765	1	alh-4
GO.0004030..aldehyde.dehydrogenase..NAD.P....activity	0.301765	1	alh-4
GO.0003842..1.pyrroline.5.carboxylate.dehydrogenase.activity	1	1	NA
GO.0006537..glutamate.biosynthetic.process	0.191841	1	W07E11.1, glna-1
GO.0006561..proline.biosynthetic.process	1	1	NA
GO.0032502..developmental.process	0.463627	1	rab-7, K09H9.7, dcr-1, hipr-1, ZK370.4
GO.0004777..succinate.semialdehyde.dehydrogenase..NAD...activity	1	1	NA
GO.0009013..succinate.semialdehyde.dehydrogenase..NAD.P....activity	1	1	NA
GO.0000062..fatty.acyl.CoA.binding	0.212868	1	K09H11.1, F58F9.7, F54D5.7, acox-1, F08A8.4, acdh-11, maa-1
GO.0004491..methylmalonate.semialdehyde.dehydrogenase..acylating..activity	1	1	NA
GO.0006573..valine.metabolic.process	1	1	NA
GO.0018478..malonate.semialdehyde.dehydrogenase..acetylating..activity	1	1	NA
GO.0019859..thymine.metabolic.process	1	1	NA
GO.0001055..RNA.polymerase.II.activity	1	1	NA
GO.0003899..DNA.directed.RNA.polymerase.activity	0.968569	1	rpom-1, T24C4.5
GO.0005665..DNA.directed.RNA.polymerase.II..core.complex	1	1	NA
GO.0008356..asymmetric.cell.division	0.370401	1	bar-1, tcl-2, sys-1, csnk-1, par-3, wrm-1
GO.0010458..exit.from.mitosis	1	1	NA
GO.0016779..nucleotidyltransferase.activity	0.244718	1	pap-1, pole-2, rev-1, flad-1, Y47D9A.1, rrf-1, cel-1, rpom-1, polq-1
GO.0042789..mRNA.transcription.from.RNA.polymerase.II.promoter	1	1	NA
GO.0005887..integral.component.of.plasma.membrane	0.409143	1	ZC266.1, sid-1, catp-3, fshr-1, folt-1, sulp-4, twk-24, twk-14, gnrr-2, pgp-9, Y51A2D.18, hmit-1.1, hmit-1.2, hrg-1, F47E1.2, K09E9.1, dsl-3, best-20, pitr-1, F35H10.10, catp-7, C46C2.2, catp-6, catp-8, Y64G10A.6, best-21, F53C3.13, K05F1.6, T28D9.3, B0252.3, kin-15, bam-2, unc-40, F56F4.3, abts-1, ncx-4, pmr-1, best-8, smp-1, spe-41, hmit-1.3, lon-1, best-5, tat-1, cua-1
GO.0006995..cellular.response.to.nitrogen.starvation	1	1	NA
GO.0008519..ammonium.transmembrane.transporter.activity	1	1	NA
GO.0015695..organic.cation.transport	0.861417	1	Y51A2D.18
GO.0015696..ammonium.transport	1	1	NA
GO.0019740..nitrogen.utilization	1	1	NA
GO.0072488..ammonium.transmembrane.transport	0.861417	1	dyb-1
GO.0034720..histone.H3.K4.demethylation	0.191841	1	rbr-2, spr-5
GO.0005635..nuclear.envelope	0.610742	1	vrk-1, samp-1, nud-2, mel-28, ulp-1, unc-116
GO.0005640..nuclear.outer.membrane	1	1	NA
GO.0007010..cytoskeleton.organization	0.257726	1	unc-26, viln-1
GO.0035046..pronuclear.migration	0.394434	1	dyci-1, gex-3, let-99, puf-3, zyg-9, spd-5, mel-28, cyk-1, lrg-1, T16G12.1
GO.0051087..chaperone.binding	0.943593	1	rme-8
GO.0051179..localization	1	1	NA
GO.0002143..tRNA.wobble.position.uridine.thiolation	1	1	NA
GO.0004792..thiosulfate.sulfurtransferase.activity	1	1	NA
GO.0008641..small.protein.activating.enzyme.activity	0.762391	1	uba-1
GO.0016925..protein.sumoylation	0.659644	1	gei-17
GO.0018117..protein.adenylylation	1	1	NA
GO.0019948..SUMO.activating.enzyme.activity	1	1	NA
GO.0031510..SUMO.activating.enzyme.complex	1	1	NA
GO.0032447..protein.urmylation	1	1	NA
GO.0042292..URM1.activating.enzyme.activity	1	1	NA
GO.0070733..protein.adenylyltransferase.activity	1	1	NA
GO.0005680..anaphase.promoting.complex	0.257726	1	apc-17, emb-30
GO.0006511..ubiquitin.dependent.protein.catabolic.process	0.999403	1	Y38C1AA.12, cul-4
GO.0031625..ubiquitin.protein.ligase.binding	0.982953	1	cul-4, uev-3
GO.0061630..ubiquitin.protein.ligase.activity	0.861502	1	tag-349, cul-4, C27A12.7, H05L14.2, uev-3, hrdl-1, C09E7.7
GO.0004842..ubiquitin.protein.transferase.activity	0.295359	1	rpm-1, tag-147, F54B11.5, eel-1, hecd-1, uba-1, tag-349, zyg-11, wwp-1, C27A12.7, lin-41, oxi-1
GO.0008054..negative.regulation.of.cyclin.dependent.protein.serine.threonine.kinase.by.cyclin.degradation	0.416563	1	zyg-11
GO.0045132..meiotic.chromosome.segregation	0.208581	1	egl-8, lipl-5, atl-1, mre-11, rad-50, eri-1, klp-18, srgp-1, lex-1, dpy-26, nos-2, C30G12.6, rrf-3, viln-1, klp-15, ppfr-1, rsa-1, top-1, Y71A12B.13, dog-1, set-2, thoc-2, dcr-1, klp-7
GO.0045842..positive.regulation.of.mitotic.metaphase.anaphase.transition	1	1	NA
GO.0097602..cullin.family.protein.binding	1	1	NA
GO.0002039..p53.binding	0.301765	1	prmt-5
GO.0034394..protein.localization.to.cell.surface	0.416563	1	aph-1
GO.0043085..positive.regulation.of.catalytic.activity	0.265923	1	spp-8, rict-1, aph-1
GO.0045165..cell.fate.commitment	0.801474	1	aph-1
GO.0048598..embryonic.morphogenesis	0.495366	1	mrck-1, pak-1, itr-1, mel-11, aph-1, aph-2
GO.0008201..heparin.binding	1	1	NA
GO.0031410..cytoplasmic.vesicle	0.347245	1	spe-39, lys-1, rme-6, vps-41, chup-1, egl-21, ptc-3, trpp-8, tat-5, ced-1
GO.0042395..ecdysis..collagen.and.cuticulin.based.cuticle	0.762391	1	lrp-1
GO.0046914..transition.metal.ion.binding	1	1	NA
GO.0009306..protein.secretion	0.843993	1	ehbp-1, apg-1
GO.0016192..vesicle.mediated.transport	0.955048	1	vps-39, vps-41, efa-6, apb-3, agef-1, apg-1, unc-16
GO.0030131..clathrin.adaptor.complex	0.715619	1	apg-1
GO.0003906..DNA..apurinic.or.apyrimidinic.site..lyase.activity	1	1	NA
GO.0006284..base.excision.repair	1	1	NA
GO.0008311..double.stranded.DNA.3.5.exodeoxyribonuclease.activity	1	1	NA
GO.0017005..3.tyrosyl.DNA.phosphodiesterase.activity	1	1	NA
GO.0090305..nucleic.acid.phosphodiester.bond.hydrolysis	0.340338	1	mre-11, fan-1, ire-1, dna-2, Y57A10A.13, slx-1, drsh-1, pqe-1, gen-1
GO.0004177..aminopeptidase.activity	0.411235	1	R09F10.1, C42C1.11, K12C11.1
GO.0001714..endodermal.cell.fate.specification	0.733001	1	skn-1, wrm-1
GO.0005881..cytoplasmic.microtubule	1	1	NA
GO.0007026..negative.regulation.of.microtubule.depolymerization	1	1	NA
GO.0007389..pattern.specification.process	1	1	NA
GO.0007492..endoderm.development	0.512495	1	wrm-1
GO.0008013..beta.catenin.binding	0.762391	1	hmr-1
GO.0008283..cell.proliferation	0.191841	1	sma-5, cdc-25.1
GO.0016055..Wnt.signaling.pathway	0.826861	1	bar-1, tcl-2, lin-17, csnk-1, wrm-1
GO.0016476..regulation.of.embryonic.cell.shape	0.416563	1	nmy-2
GO.0016477..cell.migration	0.399088	1	gck-1, cal-6, utx-1, ced-5, nhr-67, gex-3, nstp-4, sqv-7, ect-2, ash-2, let-502, teg-4, nud-2, sqv-5, ced-12, hmr-1, gale-1, exoc-8, thoc-2, epg-4, Y39E4B.6, set-16
GO.0030177..positive.regulation.of.Wnt.signaling.pathway	1	1	NA
GO.0030178..negative.regulation.of.Wnt.signaling.pathway	0.659644	1	eel-1
GO.0030877..beta.catenin.destruction.complex	1	1	NA
GO.0035414..negative.regulation.of.catenin.import.into.nucleus	1	1	NA
GO.0045295..gamma.catenin.binding	1	1	NA
GO.0045595..regulation.of.cell.differentiation	0.715619	1	mdl-1
GO.0047485..protein.N.terminus.binding	1	1	NA
GO.0048666..neuron.development	0.694991	1	bar-1, mec-15, wrm-1
GO.0051782..negative.regulation.of.cell.division	1	1	NA
GO.0090090..negative.regulation.of.canonical.Wnt.signaling.pathway	1	1	NA
GO.0008565..protein.transporter.activity	0.429071	1	F23F1.5, vps-35, imb-1, apg-1, T16G12.6
GO.0030276..clathrin.binding	0.765814	1	apg-1, hipr-1
GO.0030117..membrane.coat	0.507566	1	apb-3, apg-1
GO.0030121..AP.1.adaptor.complex	0.191841	1	soap-1, apg-1
GO.0030119..AP.type.membrane.coat.adaptor.complex	1	1	NA
GO.0008022..protein.C.terminus.binding	0.861417	1	dlk-1
GO.0008104..protein.localization	0.833222	1	tir-1, rgs-5, unc-116, hipr-1
GO.0032794..GTPase.activating.protein.binding	0.323797	1	rme-6, mpz-1
GO.0036062..presynaptic.periactive.zone	0.659644	1	rpm-1
GO.0045334..clathrin.coated.endocytic.vesicle	0.416563	1	rme-6
GO.0007040..lysosome.organization	0.31447	1	mrp-4, apb-3, tat-1
GO.0007154..cell.communication	0.587352	1	grd-5, wrt-6, dsl-3
GO.0008595..anterior.posterior.axis.specification..embryo	0.191841	1	zyg-11, emb-30
GO.0009880..embryonic.pattern.specification	0.31447	1	par-1, skn-1, glp-1
GO.0016331..morphogenesis.of.embryonic.epithelium	1	1	NA
GO.0046331..lateral.inhibition	1	1	NA
GO.0006833..water.transport	0.762391	1	aqp-7
GO.0015204..urea.transmembrane.transporter.activity	0.659644	1	aqp-7
GO.0015250..water.channel.activity	0.762391	1	aqp-7
GO.0015254..glycerol.channel.activity	0.762391	1	aqp-7
GO.0015793..glycerol.transport	0.762391	1	aqp-7
GO.0016323..basolateral.plasma.membrane	0.897698	1	fgt-1, tat-1
GO.0022838..substrate.specific.channel.activity	0.416563	1	aqp-7
GO.0071918..urea.transmembrane.transport	0.659644	1	aqp-7
GO.0008150..biological_process	0.226245	1	T28C12.4, gpcp-1, dcaf-1, R11A8.7, scl-5, gly-10, glb-9, inx-17, clec-87, B0361.4, gei-8
GO.0016567..protein.ubiquitination	0.639708	1	rpm-1, tag-147, hecd-1, dcaf-1, uba-1, tag-349, cul-4, zyg-11, wwp-1, C27A12.7, bath-40, fsn-1, oxi-1
GO.0005783..endoplasmic.reticulum	0.25587	1	fmo-5, ges-1, syx-18, mans-2, F10C2.5, C15C7.7, lnp-1, acs-22, acl-5, pek-1, skn-1, odr-8, itr-1, C47E12.3, pyk-2, F13H10.3, mogs-1, enpl-1, catp-8, rsd-2, ipla-1, C04G6.4, C44B7.11, cth-2, B0495.7, ire-1, C14A4.3, pigv-1, R05D11.9, emb-8, epg-4, ZK370.4, pad-2, fmo-3, aldo-1
GO.0007005..mitochondrion.organization	0.843993	1	C34B2.6, ymel-1
GO.0007276..gamete.generation	0.266164	1	K09H11.11, pap-1, folt-1, C06H2.7, meg-2, puf-7, vrk-1, puf-5, puf-6, puf-10, Y48G1BM.8, glh-4, nath-10, prg-1, lin-41, smc-4, met-2, R05D3.12, glp-1
GO.0048259..regulation.of.receptor.mediated.endocytosis	1	1	NA
GO.1904748..regulation.of.apoptotic.process.involved.in.development	1	1	NA
GO.0032940..secretion.by.cell	0.983275	1	Y61A9LA.5, cytb-5.1, npp-8, pmt-1, Y65B4A.2, smgl-1
GO.0012505..endomembrane.system	0.458111	1	rme-1, uda-1, glp-1
GO.0042059..negative.regulation.of.epidermal.growth.factor.receptor.signaling.pathway	0.416563	1	ark-1
GO.0000226..microtubule.cytoskeleton.organization	0.323797	1	tbcd-1, spd-2
GO.0008088..axo.dendritic.transport	1	1	NA
GO.0008333..endosome.to.lysosome.transport	0.416563	1	rab-7
GO.0048786..presynaptic.active.zone	0.903266	1	unc-13
GO.0005930..axoneme	1	1	NA
GO.0030425..dendrite	0.517798	1	egl-9, bra-1, daf-18, dyf-3, pct-1, vps-35, max-2, cdk-5
GO.0046907..intracellular.transport	0.512495	1	npp-9
GO.0032501..multicellular.organismal.process	1	1	NA
GO.0040010..positive.regulation.of.growth.rate	0.882067	1	ncr-1, lon-1
GO.0050896..response.to.stimulus	1	1	NA
GO.0000049..tRNA.binding	1	1	NA
GO.0004812..aminoacyl.tRNA.ligase.activity	0.997352	1	prx-10
GO.0004813..alanine.tRNA.ligase.activity	1	1	NA
GO.0006400..tRNA.modification	1	1	NA
GO.0006412..translation	1	1	T04H1.2, C54G10.4, rpl-11.2, rpl-25.1, R07E3.4, T07A9.14, C47E12.2, T09F3.2, mfn-1, ife-5, let-363, ant-1.2, F43G9.3, C16C10.1, prx-10
GO.0006419..alanyl.tRNA.aminoacylation	1	1	NA
GO.0016597..amino.acid.binding	0.512495	1	pah-1
GO.0016876..ligase.activity..forming.aminoacyl.tRNA.and.related.compounds	1	1	NA
GO.0043039..tRNA.aminoacylation	1	1	NA
GO.0005789..endoplasmic.reticulum.membrane	0.412172	1	fmo-5, mboa-2, lnp-1, pek-1, odr-8, itr-1, mogs-1, catp-8, rom-4, pod-2, C44B7.11, B0495.7, ire-1, C14A4.3, Y54E10BR.1, pigv-1, emb-8, doxa-1, fmo-3
GO.0005885..Arp2.3.protein.complex	1	1	NA
GO.0007015..actin.filament.organization	0.625781	1	gex-3, ced-12, cyk-1
GO.0010631..epithelial.cell.migration	1	1	NA
GO.0031252..cell.leading.edge	0.659644	1	rol-3
GO.0034314..Arp2.3.complex.mediated.actin.nucleation	1	1	NA
GO.0015629..actin.cytoskeleton	1	1	NA
GO.0030833..regulation.of.actin.filament.polymerization	1	1	NA
GO.0000176..nuclear.exosome..RNase.complex.	1	1	NA
GO.0000177..cytoplasmic.exosome..RNase.complex.	1	1	NA
GO.0004527..exonuclease.activity	0.82495	1	mre-11, eri-1, pqe-1
GO.0005730..nucleolus	0.99974	1	mig-32, rsd-2, nath-10, paxt-1, top-1
GO.0016075..rRNA.catabolic.process	1	1	NA
GO.0031125..rRNA.3.end.processing	1	1	NA
GO.0034427..nuclear.transcribed.mRNA.catabolic.process..exonucleolytic..3.5	1	1	NA
GO.0034475..U4.snRNA.3.end.processing	1	1	NA
GO.0071028..nuclear.mRNA.surveillance	1	1	NA
GO.0071051..polyadenylation.dependent.snoRNA.3.end.processing	1	1	NA
GO.0055120..striated.muscle.dense.body	0.825701	1	D2063.1, Y43F8B.2, hsp-25, pyk-2, cpna-1, C04G6.4, upb-1, wdr-23, hgo-1, pck-1, cutc-1, aldo-1
GO.0030041..actin.filament.polymerization	1	1	NA
GO.0000276..mitochondrial.proton.transporting.ATP.synthase.complex..coupling.factor.F.o.	1	1	NA
GO.0015078..hydrogen.ion.transmembrane.transporter.activity	0.694991	1	vha-7, vha-6, unc-32
GO.0015986..ATP.synthesis.coupled.proton.transport	0.66167	1	vha-7, vha-6, unc-32
GO.0034606..response.to.hermaphrodite.contact	0.882067	1	ccpp-1, pdfr-1
GO.0046933..proton.transporting.ATP.synthase.activity..rotational.mechanism	1	1	NA
GO.0045893..positive.regulation.of.transcription..DNA.templated	0.610624	1	mdt-15, F47D12.7
GO.0006754..ATP.biosynthetic.process	1	1	NA
GO.0031966..mitochondrial.membrane	0.779931	1	ogdh-1, T09F3.2, sfxn-1.4
GO.0045263..proton.transporting.ATP.synthase.complex..coupling.factor.F.o.	1	1	NA
GO.0004767..sphingomyelin.phosphodiesterase.activity	0.512495	1	asm-3
GO.0046513..ceramide.biosynthetic.process	0.659644	1	asm-3
GO.0098591..external.side.of.apical.plasma.membrane	1	1	NA
GO.0070265..necrotic.cell.death	0.587352	1	asp-3, asp-4, tat-1
GO.0000122..negative.regulation.of.transcription.from.RNA.polymerase.II.promoter	0.245196	1	gei-3, bra-1, nfi-1, hda-2, mab-3, wdr-23, sin-3, hda-3, atf-7, pros-1, gei-8, met-2, Y39E4B.6
GO.0001012..RNA.polymerase.II.regulatory.region.DNA.binding	0.592658	1	mab-3
GO.0001078..transcriptional.repressor.activity..RNA.polymerase.II.core.promoter.proximal.region.sequence.specific.binding	0.512495	1	pros-1
GO.0007623..circadian.rhythm	1	1	NA
GO.0000977..RNA.polymerase.II.regulatory.region.sequence.specific.DNA.binding	0.186333	1	elt-7, atfs-1, bra-1, atf-5, skn-1, nhr-67, nhr-43, nfi-1, lin-26, ztf-17, lin-29, zip-3, spr-4, xbp-1
GO.0000981..RNA.polymerase.II.transcription.factor.activity..sequence.specific.DNA.binding	0.415461	1	atfs-1, egl-13, atf-5, nfi-1, dpl-1, zip-3, ztf-2, lin-48, pros-1
GO.0006357..regulation.of.transcription.from.RNA.polymerase.II.promoter	0.445856	1	atfs-1, egl-13, atf-5, ZK550.4, ada-2, dpl-1, mdt-8, zip-3, lin-35, let-381, ztf-2, sur-2, lin-48, mdt-15, F47D12.7, pros-1, hlh-11, tlk-1
GO.0035966..response.to.topologically.incorrect.protein	0.323797	1	pek-1, ire-1
GO.0045824..negative.regulation.of.innate.immune.response	0.416563	1	atf-7
GO.0043169..cation.binding	0.512495	1	atgp-1
GO.0000785..chromatin	0.262252	1	vrk-1, atm-1, mel-28, zfp-1
GO.0005743..mitochondrial.inner.membrane	0.847489	1	scpl-4, R07E3.4, gas-1, C47E12.2, cchl-1, mfn-1, ant-1.2, dhod-1, C16C10.1, F25B5.6, ymel-1, ctb-1
GO.0005929..cilium	0.982953	1	dyf-3, ZK328.7
GO.0007617..mating.behavior	0.659644	1	bar-1
GO.0015991..ATP.hydrolysis.coupled.proton.transport	0.779931	1	vha-7, vha-6, unc-32
GO.0016820..hydrolase.activity..acting.on.acid.anhydrides..catalyzing.transmembrane.movement.of.substances	1	1	NA
GO.0019904..protein.domain.specific.binding	0.212868	1	rme-1, rod-1, M117.3, pkc-3, unc-40, ppfr-1, F54C8.7
GO.0033178..proton.transporting.two.sector.ATPase.complex..catalytic.domain	1	1	NA
GO.0043050..pharyngeal.pumping	0.725377	1	unc-26, mps-1, unc-13, nas-5
GO.0045261..proton.transporting.ATP.synthase.complex..catalytic.core.F.1.	1	1	NA
GO.0046034..ATP.metabolic.process	0.801474	1	ntp-1
GO.0042776..mitochondrial.ATP.synthesis.coupled.proton.transport	1	1	NA
GO.0010494..cytoplasmic.stress.granule	1	1	NA
GO.0010603..regulation.of.cytoplasmic.mRNA.processing.body.assembly	1	1	NA
GO.0034063..stress.granule.assembly	0.301765	1	gcn-2
GO.0040022..feminization.of.hermaphroditic.germ.line	0.750443	1	egl-8, fbf-1, sap-49, rab-18, epg-4
GO.0044822..poly.A..RNA.binding	0.696349	1	Y108F1.5, F52B5.3
GO.0006821..chloride.transport	0.278548	1	lgc-44, sulp-4, kcc-2, nkcc-1, clh-3, kcc-3, clh-1, avr-14, abts-1, best-5
GO.0008068..extracellular.glutamate.gated.chloride.channel.activity	0.655618	1	lgc-44, avr-14
GO.0031987..locomotion.involved.in.locomotory.behavior	0.592658	1	avr-14
GO.0042493..response.to.drug	0.696349	1	gas-1, avr-14
GO.0043051..regulation.of.pharyngeal.pumping	0.206951	1	egl-8, itr-1, cyp-33E2, nfi-1, egl-30, avr-14, unc-13, goa-1
GO.1902476..chloride.transmembrane.transport	0.420382	1	lgc-44, sulp-4, best-20, kcc-2, nkcc-1, best-21, kcc-3, avr-14, abts-1, best-8, best-5
GO.0001508..action.potential	1	1	NA
GO.0000779..condensed.chromosome..centromeric.region	1	1	NA
GO.0003690..double.stranded.DNA.binding	0.932481	1	C50F4.12
GO.0005654..nucleoplasm	0.922957	1	wrn-1, smc-6, paxt-1, klp-19
GO.0010165..response.to.X.ray	0.507566	1	him-1, lem-3
GO.0006457..protein.folding	0.972985	1	dpy-11, C03H12.1, Y17G9B.4, catp-6, enpl-1, C30H7.2, tbcd-1, R05D3.9
GO.0019903..protein.phosphatase.binding	0.512495	1	bar-1
GO.0034599..cellular.response.to.oxidative.stress	0.715619	1	bar-1
GO.0045294..alpha.catenin.binding	0.301765	1	bar-1
GO.0045296..cadherin.binding	0.592658	1	bar-1
GO.0048513..animal.organ.development	0.512495	1	bar-1
GO.0006520..cellular.amino.acid.metabolic.process	0.943593	1	R102.4
GO.0007606..sensory.perception.of.chemical.stimulus	0.923329	1	D2023.1, sre-15
GO.0019752..carboxylic.acid.metabolic.process	0.31447	1	icl-1, tag-38, ldh-1
GO.0030170..pyridoxal.phosphate.binding	0.82335	1	tag-38, cth-1, T01B11.2, cth-2, cbl-1, C16A3.10
GO.0034607..turning.behavior.involved.in.mating	0.762391	1	sax-2
GO.0036468..L.dopa.decarboxylase.activity	1	1	NA
GO.0042416..dopamine.biosynthetic.process	1	1	NA
GO.0042427..serotonin.biosynthetic.process	1	1	NA
GO.0006569..tryptophan.catabolic.process	0.191841	1	pah-1, tdo-2
GO.0042438..melanin.biosynthetic.process	0.301765	1	pah-1
GO.0005113..patched.binding	1	1	NA
GO.0005119..smoothened.binding	1	1	NA
GO.0030030..cell.projection.organization	0.952876	1	dyf-3
GO.0034464..BBSome	1	1	NA
GO.0035058..nonmotile.primary.cilium.assembly	0.992202	1	che-12
GO.0035721..intraciliary.retrograde.transport	0.762391	1	ZK328.7
GO.0036064..ciliary.basal.body	1	1	NA
GO.0061512..protein.localization.to.cilium	0.592658	1	ZK328.7
GO.0031514..motile.cilium	1	1	NA
GO.1903441..protein.localization.to.ciliary.membrane	1	1	NA
GO.0005198..structural.molecule.activity	0.974279	1	ifc-2, jph-1, F09F7.5
GO.0006890..retrograde.vesicle.mediated.transport..Golgi.to.ER	0.411235	1	syx-18, F11A10.6, tat-5
GO.0008355..olfactory.learning	0.458111	1	casy-1, fbf-1, dcr-1
GO.0042073..intraciliary.transport	1	1	NA
GO.0042384..cilium.assembly	0.897698	1	dyf-3, che-10
GO.0097546..ciliary.base	1	1	NA
GO.1904107..protein.localization.to.microvillus.membrane	1	1	NA
GO.0004089..carbonate.dehydratase.activity	1	1	NA
GO.0000045..autophagosome.assembly	0.977048	1	trpp-8
GO.0000407..pre.autophagosomal.structure	0.861417	1	trpp-8
GO.0006914..autophagy	0.949674	1	epg-5, rab-7, epg-4
GO.0009267..cellular.response.to.starvation	1	1	NA
GO.0032258..CVT.pathway	0.301765	1	trpp-8
GO.0034271..phosphatidylinositol.3.kinase.complex..class.III..type.I	1	1	NA
GO.0034272..phosphatidylinositol.3.kinase.complex..class.III..type.II	1	1	NA
GO.0040014..regulation.of.multicellular.organism.growth	0.358911	1	sma-5, lin-59, let-607, mdt-15, sbp-1
GO.0043277..apoptotic.cell.clearance	0.801474	1	R05D3.9
GO.0044804..nucleophagy	0.884216	1	trpp-8
GO.0045324..late.endosome.to.vacuole.transport	1	1	NA
GO.0005874..microtubule	0.662215	1	klp-18, klp-12, zyg-9, tpxl-1, klp-15, tbcd-1, unc-116, cls-3, klp-7, klp-19
GO.0007017..microtubule.based.process	0.990665	1	zyg-9
GO.0007635..chemosensory.behavior	1	1	NA
GO.0004869..cysteine.type.endopeptidase.inhibitor.activity	0.659644	1	cpi-2
GO.0009966..regulation.of.signal.transduction	1	1	NA
GO.0016573..histone.acetylation	0.262252	1	mys-1, ada-2, pcaf-1, taf-1
GO.1990001..inhibition.of.cysteine.type.endopeptidase.activity.involved.in.apoptotic.process	1	1	NA
GO.0005581..collagen.trimer	0.982158	1	col-142, col-150, col-158, col-159, col-183, col-103, col-36, col-83, col-50, col-60, col-96
GO.0042302..structural.constituent.of.cuticle	0.958064	1	col-142, col-150, col-158, col-159, col-183, col-103, bli-6, col-36, col-83, col-50, col-60, col-96
GO.0042329..structural.constituent.of.collagen.and.cuticulin.based.cuticle	1	1	NA
GO.0060109..medial.layer.of.collagen.and.cuticulin.based.cuticle.extracellular.matrix	1	1	NA
GO.0030312..external.encapsulating.structure	1	1	NA
GO.0016174..NAD.P.H.oxidase.activity	1	1	NA
GO.0018149..peptide.cross.linking	1	1	NA
GO.0040032..post.embryonic.body.morphogenesis	1	1	NA
GO.0042338..cuticle.development.involved.in.collagen.and.cuticulin.based.cuticle.molting.cycle	0.323797	1	dpy-31, tpst-1
GO.0042744..hydrogen.peroxide.catabolic.process	0.257726	1	ctl-2, ctl-1
GO.0098869..cellular.oxidant.detoxification	0.370401	1	gpx-5, gpx-4, gpx-6, ctl-2, ctl-1, gpx-8
GO.0008236..serine.type.peptidase.activity	0.338895	1	F56F10.1, C26B9.5, pcp-2, dpf-3, C34B2.6, Y75B8A.4
GO.0004867..serine.type.endopeptidase.inhibitor.activity	0.809777	1	srp-6, ZK287.4, crm-1, Y55F3BR.2, C08G9.2
GO.0010951..negative.regulation.of.endopeptidase.activity	0.790138	1	cpi-2, srp-6, ZK287.4, crm-1, Y55F3BR.2, C08G9.2
GO.0044254..multicellular.organismal.protein.catabolic.process	1	1	NA
GO.0000922..spindle.pole	0.223731	1	klp-18, lin-5, zyg-9, mop-25.2
GO.0003777..microtubule.motor.activity	0.307694	1	klp-18, klp-12, klp-15, unc-116, klp-7, klp-19
GO.0007018..microtubule.based.movement	0.277026	1	klp-18, klp-12, klp-15, unc-116, klp-7, klp-19
GO.0008574..ATP.dependent.microtubule.motor.activity..plus.end.directed	0.715619	1	unc-116
GO.1902845..negative.regulation.of.mitotic.spindle.elongation	1	1	NA
GO.0004077..biotin..acetyl.CoA.carboxylase..ligase.activity	1	1	NA
GO.0006464..cellular.protein.modification.process	0.223731	1	dpy-11, uba-1, ogt-1, ttll-4
GO.0003682..chromatin.binding	0.180205	1	elt-7, bra-1, nhr-8, lex-1, ada-2, lin-59, him-1, pbrm-1, zfp-1
GO.0003712..transcription.cofactor.activity	0.861417	1	bra-1
GO.0030512..negative.regulation.of.transforming.growth.factor.beta.receptor.signaling.pathway	0.323797	1	bra-1, egl-4
GO.0042393..histone.binding	0.218393	1	bra-1, jmjd-1.2, lex-1
GO.0000724..double.strand.break.repair.via.homologous.recombination	0.31447	1	smc-6, xpf-1, gen-1
GO.0006289..nucleotide.excision.repair	0.821023	1	dog-1, xpb-1
GO.0031436..BRCA1.BARD1.complex	1	1	NA
GO.0035066..positive.regulation.of.histone.acetylation	0.301765	1	ada-2
GO.0035067..negative.regulation.of.histone.acetylation	1	1	NA
GO.0045717..negative.regulation.of.fatty.acid.biosynthetic.process	1	1	NA
GO.0051307..meiotic.chromosome.separation	0.257726	1	xpf-1, slx-1
GO.0070531..BRCA1.A.complex	1	1	NA
GO.0071158..positive.regulation.of.cell.cycle.arrest	0.301765	1	nhr-67
GO.0008446..GDP.mannose.4.6.dehydratase.activity	1	1	NA
GO.0017085..response.to.insecticide	1	1	NA
GO.0019673..GDP.mannose.metabolic.process	1	1	NA
GO.0030017..sarcomere	0.382399	1	sax-7, pyk-2, C04G6.4, aldo-1
GO.0042350..GDP.L.fucose.biosynthetic.process	1	1	NA
GO.0042351..de.novo.GDP.L.fucose.biosynthetic.process	1	1	NA
GO.0075015..formation.of.infection.structure.on.or.near.host	0.592658	1	bre-3
GO.0006486..protein.glycosylation	0.217776	1	mans-2, C15C7.7, gly-13, gly-10, C27D9.1, fut-3, ogt-1, gly-3, bre-3, pad-2, gly-8, gly-5
GO.0008376..acetylgalactosaminyltransferase.activity	0.191841	1	sqv-5, mig-22
GO.0008378..galactosyltransferase.activity	1	1	NA
GO.0009636..response.to.toxic.substance	1	1	NA
GO.0033207..beta.1.4.N.acetylgalactosaminyltransferase.activity	1	1	NA
GO.0045747..positive.regulation.of.Notch.signaling.pathway	0.919183	1	osm-11
GO.0016051..carbohydrate.biosynthetic.process	1	1	NA
GO.0006352..DNA.templated.transcription..initiation	0.610624	1	brf-1, taf-1
GO.0006384..transcription.initiation.from.RNA.polymerase.III.promoter	0.512495	1	brf-1
GO.0017025..TBP.class.protein.binding	0.83413	1	brf-1
GO.0019827..stem.cell.population.maintenance	1	1	NA
GO.1903506..regulation.of.nucleic.acid.templated.transcription	0.257726	1	pqn-51, taf-11.2
GO.0000775..chromosome..centromeric.region	0.694991	1	lin-5, knl-2, smc-4
GO.0000776..kinetochore	0.530573	1	lin-5, zyg-9, nud-2, mel-28, klp-7
GO.0000777..condensed.chromosome.kinetochore	0.765814	1	lin-5, klp-7
GO.0007094..mitotic.spindle.assembly.checkpoint	1	1	NA
GO.0010940..positive.regulation.of.necrotic.cell.death	0.31447	1	rme-1, unc-26, unc-116
GO.0044281..small.molecule.metabolic.process	1	1	NA
GO.0005509..calcium.ion.binding	0.431291	1	egl-8, C31B8.8, mans-2, F10C2.5, nid-1, C56A3.6, cal-6, B0563.7, R05G6.9, cdh-5, C47E12.3, F23F1.2, casy-1, T13C2.6, efhd-1, T25G3.4, lrp-1, ncx-4, rsa-1, hmr-1, cdh-4, B0393.5, efk-1, mup-4, R08D7.5, glp-1
GO.0004714..transmembrane.receptor.protein.tyrosine.kinase.activity	0.363154	1	svh-2, kin-15, kin-16
GO.0005109..frizzled.binding	1	1	NA
GO.0007411..axon.guidance	0.464612	1	pst-1, egl-9, nck-1, pak-1, hst-2, gex-3, max-2, ctl-1, unc-40, unc-13, T24D1.3, tir-1, cdh-4, unc-116
GO.0017147..Wnt.protein.binding	0.762391	1	lin-17
GO.0018108..peptidyl.tyrosine.phosphorylation	0.433478	1	C24G6.2, F09G2.1, svh-2, kin-15, kin-16, R151.1
GO.0031594..neuromuscular.junction	0.801474	1	rpm-1
GO.0032809..neuronal.cell.body.membrane	0.31447	1	sax-7, casy-1, mps-1
GO.0043204..perikaryon	0.606917	1	egl-8, pak-1, unc-43, max-2
GO.0045200..establishment.of.neuroblast.polarity	1	1	NA
GO.0005869..dynactin.complex	1	1	NA
GO.0008290..F.actin.capping.protein.complex	1	1	NA
GO.0051693..actin.filament.capping	1	1	NA
GO.0000578..embryonic.axis.specification	1	1	NA
GO.0000902..cell.morphogenesis	0.561265	1	ect-2, sax-2
GO.0010591..regulation.of.lamellipodium.assembly	1	1	NA
GO.0051490..negative.regulation.of.filopodium.assembly	1	1	NA
GO.0007631..feeding.behavior	0.610624	1	rict-1, egl-30
GO.0008504..monoamine.transmembrane.transporter.activity	1	1	NA
GO.0015844..monoamine.transport	1	1	NA
GO.0004511..tyrosine.3.monooxygenase.activity	1	1	NA
GO.0007638..mechanosensory.behavior	0.833222	1	osm-11, mps-1, rme-8, glp-1
GO.0032094..response.to.food	0.610624	1	dhs-28, goa-1
GO.0042136..neurotransmitter.biosynthetic.process	0.416563	1	tbh-1
GO.0042417..dopamine.metabolic.process	1	1	NA
GO.0042423..catecholamine.biosynthetic.process	1	1	NA
GO.0003934..GTP.cyclohydrolase.I.activity	1	1	NA
GO.0006729..tetrahydrobiopterin.biosynthetic.process	1	1	NA
GO.0035998..7.8.dihydroneopterin.3.triphosphate.biosynthetic.process	1	1	NA
GO.0046654..tetrahydrofolate.biosynthetic.process	1	1	NA
GO.0005901..caveola	1	1	NA
GO.0030133..transport.vesicle	1	1	NA
GO.0048471..perinuclear.region.of.cytoplasm	0.186333	1	mut-15, gly-13, cytb-5.1, odr-8, ntp-1, ced-3, rsd-2, fbf-1, glh-1, sel-2, cid-1, ogt-1, unc-16, cua-1
GO.0060473..cortical.granule	0.715619	1	ugtp-1
GO.0070836..caveola.assembly	1	1	NA
GO.0005319..lipid.transporter.activity	0.388212	1	vit-5, vit-1
GO.0007166..cell.surface.receptor.signaling.pathway	0.957524	1	C44B12.6, lin-17
GO.0004402..histone.acetyltransferase.activity	0.186857	1	mys-1, ada-2, pcaf-1, taf-1
GO.0004468..lysine.N.acetyltransferase.activity..acting.on.acetyl.phosphate.as.donor	1	1	NA
GO.0010975..regulation.of.neuron.projection.development	1	1	NA
GO.0016746..transferase.activity..transferring.acyl.groups	0.445495	1	acl-9, mys-1, cpt-5, T20B3.1, acl-12, F41E7.6, acl-5, acl-1, B0395.3, dhhc-6, oac-37, hhat-2, nath-10, dhhc-3, dhhc-7, F44B9.5
GO.0018393..internal.peptidyl.lysine.acetylation	1	1	NA
GO.0043065..positive.regulation.of.apoptotic.process	0.843993	1	eel-1, wts-1
GO.0061629..RNA.polymerase.II.sequence.specific.DNA.binding.transcription.factor.binding	1	1	NA
GO.0005244..voltage.gated.ion.channel.activity	0.897698	1	shw-1, nca-2
GO.0005245..voltage.gated.calcium.channel.activity	1	1	NA
GO.0005261..cation.channel.activity	0.659644	1	nca-2
GO.0005262..calcium.channel.activity	0.223731	1	itr-1, ncx-4, trp-4, spe-41
GO.0005891..voltage.gated.calcium.channel.complex	1	1	NA
GO.0006816..calcium.ion.transport	0.572863	1	itr-1, pmr-1, spe-41, nca-2
GO.0008332..low.voltage.gated.calcium.channel.activity	1	1	NA
GO.0034765..regulation.of.ion.transmembrane.transport	0.897698	1	shw-1, nca-2
GO.0045760..positive.regulation.of.action.potential	1	1	NA
GO.0051899..membrane.depolarization	1	1	NA
GO.0070588..calcium.ion.transmembrane.transport	0.358911	1	itr-1, ncx-4, pmr-1, trp-4, spe-41
GO.0086010..membrane.depolarization.during.action.potential	0.512495	1	nca-2
GO.0007528..neuromuscular.junction.development	1	1	NA
GO.0008331..high.voltage.gated.calcium.channel.activity	1	1	NA
GO.0051924..regulation.of.calcium.ion.transport	1	1	NA
GO.0061199..striated.muscle.contraction.involved.in.embryonic.body.morphogenesis	0.980827	1	cpna-1
GO.1901385..regulation.of.voltage.gated.calcium.channel.activity	1	1	NA
GO.0004535..poly.A..specific.ribonuclease.activity	0.301765	1	panl-2
GO.0017148..negative.regulation.of.translation	0.546474	1	puf-9, fbf-1, puf-6
GO.0030014..CCR4.NOT.complex	1	1	NA
GO.0030015..CCR4.NOT.core.complex	1	1	NA
GO.0043928..exonucleolytic.nuclear.transcribed.mRNA.catabolic.process.involved.in.deadenylation.dependent.decay	1	1	NA
GO.0090503..RNA.phosphodiester.bond.hydrolysis..exonucleolytic	0.715619	1	panl-2
GO.0004129..cytochrome.c.oxidase.activity	1	1	NA
GO.0005740..mitochondrial.envelope	1	1	NA
GO.0010332..response.to.gamma.radiation	0.257726	1	K08D8.5, C32H11.1
GO.0005832..chaperonin.containing.T.complex	1	1	NA
GO.0051082..unfolded.protein.binding	0.980114	1	hsp-12.3, enpl-1
GO.0006270..DNA.replication.initiation	0.903266	1	div-1
GO.0004721..phosphoprotein.phosphatase.activity	0.528521	1	ppm-1, scpl-4, Y41D4A.5, F42G8.8, clr-1, Y71G12B.30, cdc-25.1, F22D6.9, scpl-1, C23G10.1, F20H11.4, F54F12.1
GO.0004722..protein.serine.threonine.phosphatase.activity	0.733001	1	ppm-1, ogt-1
GO.0004725..protein.tyrosine.phosphatase.activity	0.53499	1	daf-18, Y41D4A.5, C46A5.1, clr-1, Y48G1C.5, cdc-25.1, moa-1, mtm-3, F20H11.4, F54F12.1
GO.0006470..protein.dephosphorylation	0.250978	1	ppm-1, scpl-4, daf-18, Y41D4A.5, lip-1, C46A5.1, F42G8.8, C24F3.2, clr-1, Y48G1C.5, Y71G12B.30, cdc-25.1, F22D6.9, ppfr-1, cel-1, C04F12.8, scpl-1, moa-1, C23G10.1, F20H11.4, ogt-1, F54F12.1
GO.0007096..regulation.of.exit.from.mitosis	1	1	NA
GO.0008138..protein.tyrosine.serine.threonine.phosphatase.activity	0.262252	1	lip-1, C24F3.2, cel-1, C04F12.8
GO.0016791..phosphatase.activity	0.449732	1	C53A3.2, scpl-1
GO.0035335..peptidyl.tyrosine.dephosphorylation	0.362117	1	daf-18, Y41D4A.5, C46A5.1, clr-1, Y48G1C.5, cdc-25.1, cel-1, C04F12.8, moa-1, mtm-3, F20H11.4, F54F12.1, mtm-6
GO.0040038..polar.body.extrusion.after.meiotic.divisions	0.919183	1	unc-116
GO.0045786..negative.regulation.of.cell.cycle	1	1	NA
GO.0060284..regulation.of.cell.development	1	1	NA
GO.0071850..mitotic.cell.cycle.arrest	0.512495	1	lin-35
GO.1990023..mitotic.spindle.midzone	1	1	NA
GO.0000087..mitotic.M.phase	0.416563	1	cdc-25.1
GO.0000212..meiotic.spindle.organization	0.257726	1	zyg-9, cdc-25.1
GO.0000132..establishment.of.mitotic.spindle.orientation	0.562607	1	sax-7, let-99, nud-2, hmr-1, par-3
GO.0032970..regulation.of.actin.filament.based.process	0.191841	1	rga-3, ect-2
GO.0040001..establishment.of.mitotic.spindle.localization	0.265923	1	lin-5, par-6, par-3
GO.0004126..cytidine.deaminase.activity	1	1	NA
GO.0006217..deoxycytidine.catabolic.process	1	1	NA
GO.0009451..RNA.modification	0.967112	1	F25B5.5
GO.0009972..cytidine.deamination	1	1	NA
GO.0016070..RNA.metabolic.process	0.323797	1	glh-2, glh-1
GO.0047844..deoxycytidine.deaminase.activity	1	1	NA
GO.0005385..zinc.ion.transmembrane.transporter.activity	0.289171	1	PDB1.1, C14H10.1, ZK185.5, C06G8.3, hke-4.1
GO.0006829..zinc.II.ion.transport	1	1	NA
GO.0008324..cation.transmembrane.transporter.activity	0.223731	1	PDB1.1, ZK185.5, K07H8.2, gon-2
GO.0010043..response.to.zinc.ion	0.610624	1	PDB1.1, ZK185.5
GO.0046579..positive.regulation.of.Ras.protein.signal.transduction	1	1	NA
GO.0061088..regulation.of.sequestering.of.zinc.ion	0.561265	1	PDB1.1, ZK185.5
GO.0071294..cellular.response.to.zinc.ion	1	1	NA
GO.0071577..zinc.II.ion.transmembrane.transport	0.289171	1	PDB1.1, C14H10.1, ZK185.5, C06G8.3, hke-4.1
GO.0007156..homophilic.cell.adhesion.via.plasma.membrane.adhesion.molecules	0.186857	1	cdh-5, casy-1, hmr-1, cdh-4
GO.0008306..associative.learning	0.715619	1	casy-1
GO.0001556..oocyte.maturation	0.503309	1	itr-1, oma-1, wee-1.3
GO.0005815..microtubule.organizing.center	0.42241	1	lin-5, zyg-9, spd-5, sas-4
GO.0032436..positive.regulation.of.proteasomal.ubiquitin.dependent.protein.catabolic.process	0.503309	1	tag-349, zyg-11, C27A12.7
GO.0045836..positive.regulation.of.meiotic.nuclear.division	1	1	NA
GO.0051446..positive.regulation.of.meiotic.cell.cycle	1	1	NA
GO.0071902..positive.regulation.of.protein.serine.threonine.kinase.activity	1	1	NA
GO.0007530..sex.determination	1	1	NA
GO.0008584..male.gonad.development	0.659644	1	sys-1
GO.0032877..positive.regulation.of.DNA.endoreduplication	1	1	NA
GO.0044843..cell.cycle.G1.S.phase.transition	1	1	NA
GO.1900087..positive.regulation.of.G1.S.transition.of.mitotic.cell.cycle	1	1	NA
GO.0051965..positive.regulation.of.synapse.assembly	0.301765	1	cdk-5
GO.1904799..regulation.of.neuron.remodeling	0.301765	1	cdk-5
GO.1904810..negative.regulation.of.dense.core.granule.transport	0.301765	1	cdk-5
GO.1904811..positive.regulation.of.dense.core.granule.transport	0.301765	1	cdk-5
GO.2000331..regulation.of.terminal.button.organization	0.301765	1	cdk-5
GO.0005675..holo.TFIIH.complex	0.512495	1	cdk-7
GO.0009299..mRNA.transcription	0.301765	1	cdk-7
GO.0003729..mRNA.binding	0.651424	1	spn-4, edc-3, R06C1.4, msi-1, pcf-11
GO.0007076..mitotic.chromosome.condensation	1	1	NA
GO.1990170..stress.response.to.cadmium.ion	0.257726	1	cdr-2, pgp-3
GO.0006260..DNA.replication	0.246124	1	rfc-1, pole-2, wrn-1, cul-4, nfi-1, orc-2, pif-1, top-1, T24C4.5, polq-1, div-1
GO.0001845..phagolysosome.assembly	0.301765	1	ced-1
GO.0001891..phagocytic.cup	0.592658	1	ced-1
GO.0043654..recognition.of.apoptotic.cell	0.301765	1	ced-1
GO.0005070..SH3.SH2.adaptor.activity	1	1	NA
GO.0006909..phagocytosis	0.323797	1	ced-12, ced-6
GO.0009967..positive.regulation.of.signal.transduction	1	1	NA
GO.0032403..protein.complex.binding	0.218393	1	ced-5, tpxl-1, ced-12
GO.0004175..endopeptidase.activity	0.694991	1	trpp-12, ced-3, ulp-1
GO.0016540..protein.autoprocessing	0.592658	1	ced-3
GO.0030155..regulation.of.cell.adhesion	0.323797	1	ced-3, sma-6
GO.0042981..regulation.of.apoptotic.process	0.222355	1	tig-2, gck-2, gck-3, pak-1, sek-6, drl-1, ced-3, max-2, mtk-1
GO.0097194..execution.phase.of.apoptosis	0.715619	1	ced-3
GO.0097200..cysteine.type.endopeptidase.activity.involved.in.execution.phase.of.apoptosis	0.416563	1	ced-3
GO.1902742..apoptotic.process.involved.in.development	0.191841	1	ced-5, ced-3
GO.0008635..activation.of.cysteine.type.endopeptidase.activity.involved.in.apoptotic.process.by.cytochrome.c	1	1	NA
GO.0008656..cysteine.type.endopeptidase.activator.activity.involved.in.apoptotic.process	0.301765	1	R09F10.1
GO.0010954..positive.regulation.of.protein.processing	1	1	NA
GO.0016505..peptidase.activator.activity.involved.in.apoptotic.process	1	1	NA
GO.0043281..regulation.of.cysteine.type.endopeptidase.activity.involved.in.apoptotic.process	1	1	NA
GO.0043531..ADP.binding	1	1	NA
GO.0051432..BH1.domain.binding	1	1	NA
GO.0051434..BH3.domain.binding	1	1	NA
GO.0061133..endopeptidase.activator.activity	1	1	NA
GO.2001056..positive.regulation.of.cysteine.type.endopeptidase.activity	1	1	NA
GO.0005124..scavenger.receptor.binding	0.301765	1	ced-6
GO.0045335..phagocytic.vesicle	0.655618	1	rab-7, ced-6
GO.0070782..phosphatidylserine.exposure.on.apoptotic.cell.surface	1	1	NA
GO.0000422..mitophagy	1	1	NA
GO.0005741..mitochondrial.outer.membrane	0.972526	1	wdr-23
GO.0010636..positive.regulation.of.mitochondrial.fusion	1	1	NA
GO.0043069..negative.regulation.of.programmed.cell.death	1	1	NA
GO.0046982..protein.heterodimerization.activity	0.893751	1	his-6, his-41, mdl-1, his-38, nfyb-1, taf-11.2, div-1
GO.0097192..extrinsic.apoptotic.signaling.pathway.in.absence.of.ligand	1	1	NA
GO.2001243..negative.regulation.of.intrinsic.apoptotic.signaling.pathway	1	1	NA
GO.0001764..neuron.migration	0.877592	1	nid-1, rin-1, unc-40
GO.0008045..motor.neuron.axon.guidance	0.903266	1	unc-40
GO.0010172..embryonic.body.morphogenesis	0.407729	1	mrck-1, pak-1, gex-3, mel-11, let-502, wrm-1, ddx-23
GO.0033563..dorsal.ventral.axon.guidance	0.625781	1	rin-1, unc-40, madd-4
GO.0048812..neuron.projection.morphogenesis	0.715619	1	lin-23
GO.0048846..axon.extension.involved.in.axon.guidance	0.223731	1	enu-3.3, enu-3.2, enu-3.6, enu-3.5
GO.0050764..regulation.of.phagocytosis	0.301765	1	pld-1
GO.0097628..distal.tip.cell.migration	1	1	NA
GO.0005547..phosphatidylinositol.3.4.5.trisphosphate.binding	0.416563	1	ced-12
GO.0017048..Rho.GTPase.binding	0.388212	1	daam-1, ced-12
GO.0035262..gonad.morphogenesis	0.307694	1	pak-1, cogc-8, nhr-67, max-2, ced-12, dcr-1
GO.0070273..phosphatidylinositol.4.phosphate.binding	0.257726	1	ipla-1, ced-12
GO.0080025..phosphatidylinositol.3.5.bisphosphate.binding	0.512495	1	ced-12
GO.0051400..BH.domain.binding	1	1	NA
GO.0007588..excretion	1	1	NA
GO.0030104..water.homeostasis	0.512495	1	pod-2
GO.0060290..transdifferentiation	0.218393	1	cfp-1, ash-2, set-2
GO.1904081..positive.regulation.of.transcription.from.RNA.polymerase.II.promoter.involved.in.neuron.differentiation	1	1	NA
GO.0021520..spinal.cord.motor.neuron.cell.fate.specification	1	1	NA
GO.0016337..single.organismal.cell.cell.adhesion	1	1	NA
GO.0016048..detection.of.temperature.stimulus	1	1	NA
GO.0030182..neuron.differentiation	0.861417	1	pros-1
GO.0040040..thermosensory.behavior	1	1	NA
GO.0009957..epidermal.cell.fate.specification	0.512495	1	lin-41
GO.0045026..plasma.membrane.fusion	0.592658	1	egl-13
GO.0048859..formation.of.anatomical.boundary	1	1	NA
GO.0001228..transcriptional.activator.activity..RNA.polymerase.II.transcription.regulatory.region.sequence.specific.binding	0.943593	1	elt-7
GO.0030516..regulation.of.axon.extension	1	1	NA
GO.0008354..germ.cell.migration	1	1	NA
GO.0030728..ovulation	0.844345	1	lin-3, ani-2, plc-3
GO.1900194..negative.regulation.of.oocyte.maturation	0.659644	1	inx-14
GO.0001225..RNA.polymerase.II.transcription.coactivator.binding	0.512495	1	wts-1
GO.0007498..mesoderm.development	1	1	NA
GO.0007501..mesodermal.cell.fate.specification	0.83413	1	let-381
GO.0009786..regulation.of.asymmetric.cell.division	0.363154	1	ipla-1, lin-17, sys-1
GO.0009952..anterior.posterior.pattern.specification	1	1	NA
GO.0042692..muscle.cell.differentiation	1	1	NA
GO.0001077..transcriptional.activator.activity..RNA.polymerase.II.core.promoter.proximal.region.sequence.specific.binding	1	1	NA
GO.0043282..pharyngeal.muscle.development	0.715619	1	glp-1
GO.0034243..regulation.of.transcription.elongation.from.RNA.polymerase.II.promoter	1	1	NA
GO.0009888..tissue.development	0.884216	1	nhr-8
GO.0009886..post.embryonic.morphogenesis	0.512495	1	fem-3
GO.0048665..neuron.fate.specification	1	1	NA
GO.0000723..telomere.maintenance	0.218393	1	rad-50, pif-1, dog-1
GO.0000781..chromosome..telomeric.region	1	1	NA
GO.0000784..nuclear.chromosome..telomeric.region	1	1	NA
GO.0003691..double.stranded.telomeric.DNA.binding	1	1	NA
GO.0008301..DNA.binding..bending	1	1	NA
GO.0016233..telomere.capping	1	1	NA
GO.0032200..telomere.organization	1	1	NA
GO.0042048..olfactory.behavior	1	1	NA
GO.0042162..telomeric.DNA.binding	1	1	NA
GO.0007538..primary.sex.determination	1	1	NA
GO.0043073..germ.cell.nucleus	0.449732	1	gon-4, fbf-1
GO.0006891..intra.Golgi.vesicle.mediated.transport	0.765814	1	cogc-8, cogc-5
GO.0030173..integral.component.of.Golgi.membrane	0.411235	1	pst-1, sms-1, maa-1
GO.0006030..chitin.metabolic.process	0.903266	1	cpg-1
GO.0008061..chitin.binding	0.750419	1	chil-10, chil-24, chil-13, cpg-1
GO.0006370..7.methylguanosine.mRNA.capping	0.592658	1	cel-1
GO.0042594..response.to.starvation	0.358911	1	mlk-1, dhs-28, gcn-2, mdt-15, F56C9.10
GO.0042770..signal.transduction.in.response.to.DNA.damage	0.301765	1	eel-1
GO.0043068..positive.regulation.of.programmed.cell.death	0.83413	1	unc-32
GO.0030529..intracellular.ribonucleoprotein.complex	1	1	rpl-11.2, rpl-25.1
GO.0043021..ribonucleoprotein.complex.binding	1	1	NA
GO.0035567..non.canonical.Wnt.signaling.pathway	0.512495	1	lin-17
GO.0042813..Wnt.activated.receptor.activity	0.592658	1	lin-17
GO.0060070..canonical.Wnt.signaling.pathway	0.83413	1	lin-17
GO.0004004..ATP.dependent.RNA.helicase.activity	0.43886	1	Y108F1.5, mel-46, ddx-19, glh-4, glh-2, glh-1, F52B5.3, ddx-23
GO.0010501..RNA.secondary.structure.unwinding	0.495366	1	mel-46, ddx-19, glh-4, glh-2, glh-1, ddx-23
GO.0016071..mRNA.metabolic.process	1	1	NA
GO.0033962..cytoplasmic.mRNA.processing.body.assembly	0.659644	1	edc-3
GO.0043229..intracellular.organelle	1	1	NA
GO.0003746..translation.elongation.factor.activity	0.79506	1	eef-1A.2, ell-1
GO.0006414..translational.elongation	0.79506	1	eef-1A.2, ell-1
GO.0004102..choline.O.acetyltransferase.activity	1	1	NA
GO.0008292..acetylcholine.biosynthetic.process	1	1	NA
GO.0060076..excitatory.synapse	1	1	NA
GO.0001709..cell.fate.determination	1	1	NA
GO.0003678..DNA.helicase.activity	0.363154	1	C08F8.2, pif-1, chl-1
GO.0046580..negative.regulation.of.Ras.protein.signal.transduction	0.265923	1	lin-15B, lip-1, dpl-1
GO.0030992..intraciliary.transport.particle.B	0.884216	1	dyf-3
GO.0003774..motor.activity	0.779931	1	hum-2, nmy-2, hum-1
GO.0030286..dynein.complex	1	1	NA
GO.0034608..vulval.location	1	1	NA
GO.0051959..dynein.light.intermediate.chain.binding	1	1	NA
GO.0060170..ciliary.membrane	1	1	NA
GO.0061066..positive.regulation.of.dauer.larval.development	0.507566	1	aak-2, daf-18
GO.0005222..intracellular.cAMP.activated.cation.channel.activity	1	1	NA
GO.0005223..intracellular.cGMP.activated.cation.channel.activity	1	1	NA
GO.0005249..voltage.gated.potassium.channel.activity	0.587352	1	kqt-2, shw-1, kqt-3
GO.0030553..cGMP.binding	0.512495	1	egl-4
GO.0042391..regulation.of.membrane.potential	0.903266	1	sulp-4
GO.0071805..potassium.ion.transmembrane.transport	0.834661	1	twk-24, twk-14, kcnl-4, kqt-2, kcc-2, kcc-3, shw-1, kqt-3
GO.0005921..gap.junction	0.358911	1	inx-7, inx-8, inx-17, eat-5, inx-14
GO.0009408..response.to.heat	0.278548	1	mtl-1, lmd-3, lea-1, daf-18, skn-1, eak-7, dcap-2, gcs-1, gcn-2, let-363
GO.0030991..intraciliary.transport.particle.A	0.592658	1	ZK328.7
GO.0035720..intraciliary.anterograde.transport	1	1	NA
GO.0035869..ciliary.transition.zone	0.952876	1	che-10
GO.0004100..chitin.synthase.activity	0.301765	1	chs-1
GO.0033314..mitotic.DNA.replication.checkpoint	0.512495	1	lrr-1
GO.0051574..positive.regulation.of.histone.H3.K9.methylation	1	1	NA
GO.0000209..protein.polyubiquitination	0.436583	1	tag-349, Y119C1B.5, C27A12.7, H05L14.2, uev-3, hrdl-1, C09E7.7
GO.0030544..Hsp70.protein.binding	0.416563	1	skn-1
GO.0034450..ubiquitin.ubiquitin.ligase.activity	1	1	NA
GO.0045214..sarcomere.organization	0.561265	1	dyb-1, unc-94
GO.0051865..protein.autoubiquitination	0.512495	1	F54B11.5
GO.0006814..sodium.ion.transport	0.23521	1	acd-4, del-6, flr-1, nhx-6, kcc-3, acd-5, acd-2, slc-17.3, slc-17.2, vglu-3
GO.0015220..choline.transmembrane.transporter.activity	1	1	NA
GO.0015871..choline.transport	1	1	NA
GO.0000272..polysaccharide.catabolic.process	1	1	NA
GO.0004568..chitinase.activity	0.694991	1	chil-10, chil-24, chil-13
GO.0006032..chitin.catabolic.process	0.694991	1	chil-10, chil-24, chil-13
GO.0009620..response.to.fungus	1	1	NA
GO.0000307..cyclin.dependent.protein.kinase.holoenzyme.complex	1	1	NA
GO.0016538..cyclin.dependent.protein.serine.threonine.kinase.regulator.activity	1	1	NA
GO.0045737..positive.regulation.of.cyclin.dependent.protein.serine.threonine.kinase.activity	1	1	NA
GO.1901409..positive.regulation.of.phosphorylation.of.RNA.polymerase.II.C.terminal.domain	1	1	NA
GO.0004103..choline.kinase.activity	1	1	NA
GO.0006657..CDP.choline.pathway	1	1	NA
GO.0004305..ethanolamine.kinase.activity	1	1	NA
GO.0006646..phosphatidylethanolamine.biosynthetic.process	1	1	NA
GO.0006656..phosphatidylcholine.biosynthetic.process	1	1	NA
GO.0008654..phospholipid.biosynthetic.process	0.897698	1	acl-12, acl-1
GO.0004860..protein.kinase.inhibitor.activity	1	1	NA
GO.0007050..cell.cycle.arrest	0.715619	1	cki-2
GO.0032875..regulation.of.DNA.endoreduplication	0.416563	1	cki-2
GO.0045596..negative.regulation.of.cell.differentiation	1	1	NA
GO.0045605..negative.regulation.of.epidermal.cell.differentiation	1	1	NA
GO.0051302..regulation.of.cell.division	0.218393	1	cki-2, dpl-1, lin-35
GO.1904030..negative.regulation.of.cyclin.dependent.protein.kinase.activity	1	1	NA
GO.2000134..negative.regulation.of.G1.S.transition.of.mitotic.cell.cycle	1	1	NA
GO.0004683..calmodulin.dependent.protein.kinase.activity	0.323797	1	unc-43, mnk-1
GO.0019722..calcium.mediated.signaling	1	1	NA
GO.0032793..positive.regulation.of.CREB.transcription.factor.activity	1	1	NA
GO.0045860..positive.regulation.of.protein.kinase.activity	0.191841	1	wrm-1, tlk-1
GO.0006303..double.strand.break.repair.via.nonhomologous.end.joining	1	1	NA
GO.0006310..DNA.recombination	0.342079	1	wrn-1, pif-1, him-1, slx-1
GO.0043564..Ku70.Ku80.complex	1	1	NA
GO.0071480..cellular.response.to.gamma.radiation	1	1	NA
GO.0071481..cellular.response.to.X.ray	1	1	NA
GO.0016817..hydrolase.activity..acting.on.acid.anhydrides	0.659644	1	C08F8.2
GO.0005911..cell.cell.junction	1	1	NA
GO.0090136..epithelial.cell.cell.adhesion	1	1	NA
GO.0005604..basement.membrane	0.967112	1	nid-1
GO.0031012..extracellular.matrix	0.561265	1	C31B8.8, mup-4
GO.0050808..synapse.organization	0.449732	1	nid-1, madd-4
GO.0005247..voltage.gated.chloride.channel.activity	0.257726	1	clh-3, clh-1
GO.1903959..regulation.of.anion.transmembrane.transport	0.449732	1	clh-3, clh-1
GO.0010466..negative.regulation.of.peptidase.activity	0.765814	1	cpi-2, C08G9.2
GO.0030414..peptidase.inhibitor.activity	0.765814	1	cpi-2, C08G9.2
GO.0000975..regulatory.region.DNA.binding	1	1	NA
GO.0001933..negative.regulation.of.protein.phosphorylation	1	1	NA
GO.0001934..positive.regulation.of.protein.phosphorylation	0.265923	1	pek-1, gcn-2, wrm-1
GO.0006119..oxidative.phosphorylation	1	1	NA
GO.0006744..ubiquinone.biosynthetic.process	1	1	NA
GO.0030534..adult.behavior	1	1	NA
GO.0045333..cellular.respiration	1	1	NA
GO.0048520..positive.regulation.of.behavior	1	1	NA
GO.0051094..positive.regulation.of.developmental.process	1	1	NA
GO.1904808..positive.regulation.of.protein.oxidation	0.301765	1	gcn-2
GO.2000377..regulation.of.reactive.oxygen.species.metabolic.process	1	1	NA
GO.0005765..lysosomal.membrane	0.222352	1	vps-39, hrg-1, haf-4, haf-9, vps-16
GO.0007034..vacuolar.transport	0.696349	1	spe-39, vps-41
GO.0015809..arginine.transport	1	1	NA
GO.0031301..integral.component.of.organelle.membrane	1	1	NA
GO.0051453..regulation.of.intracellular.pH	0.655618	1	sulp-4, vha-14
GO.0004198..calcium.dependent.cysteine.type.endopeptidase.activity	0.83413	1	clp-2
GO.0031430..M.band	0.844345	1	hsp-25, cpna-1, scpl-1
GO.0005001..transmembrane.receptor.protein.tyrosine.phosphatase.activity	0.592658	1	clr-1
GO.0016482..cytosolic.transport	1	1	NA
GO.0031134..sister.chromatid.biorientation	1	1	NA
GO.0051306..mitotic.sister.chromatid.separation	1	1	NA
GO.0072686..mitotic.spindle	1	1	NA
GO.0031965..nuclear.membrane	0.587352	1	flr-1, imb-1, T16G12.6
GO.0051296..establishment.of.meiotic.spindle.orientation	0.191841	1	lin-5, unc-116
GO.0045664..regulation.of.neuron.differentiation	1	1	NA
GO.0010754..negative.regulation.of.cGMP.mediated.signaling	1	1	NA
GO.0070482..response.to.oxygen.levels	0.507566	1	egl-4, pde-2
GO.0048609..multicellular.organismal.reproductive.process	0.257726	1	eri-1, itr-1
GO.0060582..cell.fate.determination.involved.in.pattern.specification	1	1	NA
GO.0090630..activation.of.GTPase.activity	1	1	NA
GO.0007368..determination.of.left.right.symmetry	1	1	NA
GO.0007030..Golgi.organization	1	1	NA
GO.0017119..Golgi.transport.complex	0.257726	1	cogc-8, cogc-5
GO.0000228..nuclear.chromosome	0.31447	1	dpy-26, scc-1, orc-2
GO.0007130..synaptonemal.complex.assembly	0.715619	1	scc-1
GO.0051177..meiotic.sister.chromatid.cohesion	1	1	NA
GO.0002164..larval.development	0.512495	1	slx-1
GO.0060107..annuli.extracellular.matrix	1	1	NA
GO.0060111..alae.of.collagen.and.cuticulin.based.cuticle.extracellular.matrix	1	1	NA
GO.0006950..response.to.stress	0.821023	1	egl-9, enpl-1
GO.0008299..isoprenoid.biosynthetic.process	1	1	NA
GO.0031314..extrinsic.component.of.mitochondrial.inner.membrane	1	1	NA
GO.0002083..4.hydroxybenzoate.decaprenyltransferase.activity	1	1	NA
GO.0004659..prenyltransferase.activity	1	1	NA
GO.0047293..4.hydroxybenzoate.nonaprenyltransferase.activity	1	1	NA
GO.0008168..methyltransferase.activity	0.715416	1	comt-4, prmt-3, pmt-1, ash-2, lin-59, tfbm-1, set-2, prmt-5, Y102E9.2, met-2, set-3, set-16
GO.0008425..2.polyprenyl.6.methoxy.1.4.benzoquinone.methyltransferase.activity	1	1	NA
GO.0008757..S.adenosylmethionine.dependent.methyltransferase.activity	0.919183	1	pmt-1
GO.0016709..oxidoreductase.activity..acting.on.paired.donors..with.incorporation.or.reduction.of.molecular.oxygen..NAD.P.H.as.one.donor..and.incorporation.of.one.atom.of.oxygen	1	1	NA
GO.0044550..secondary.metabolite.biosynthetic.process	1	1	NA
GO.0000900..translation.repressor.activity..nucleic.acid.binding	1	1	NA
GO.0008135..translation.factor.activity..RNA.binding	0.715619	1	eef-1A.2
GO.0043022..ribosome.binding	1	1	NA
GO.1990124..messenger.ribonucleoprotein.complex	1	1	NA
GO.2000766..negative.regulation.of.cytoplasmic.translation	1	1	NA
GO.0005847..mRNA.cleavage.and.polyadenylation.specificity.factor.complex	0.592658	1	R06C1.4
GO.0016607..nuclear.speck	1	1	NA
GO.0031124..mRNA.3.end.processing	0.592658	1	clpf-1
GO.0098789..pre.mRNA.cleavage.required.for.polyadenylation	0.301765	1	R06C1.4
GO.0019239..deaminase.activity	0.903266	1	C06G3.5
GO.0031983..vesicle.lumen	1	1	NA
GO.0042718..yolk.granule	1	1	NA
GO.0030016..myofibril	1	1	NA
GO.0004521..endoribonuclease.activity	0.659644	1	ire-1
GO.0006309..apoptotic.DNA.fragmentation	0.561265	1	nuc-1, dcr-1
GO.0006401..RNA.catabolic.process	0.388212	1	eri-1, dcr-1
GO.0060102..collagen.and.cuticulin.based.cuticle.extracellular.matrix	0.762391	1	pxf-1
GO.0001223..transcription.coactivator.binding	1	1	NA
GO.0048256..flap.endonuclease.activity	1	1	NA
GO.0004536..deoxyribonuclease.activity	0.512495	1	Y37H2A.1
GO.0016888..endodeoxyribonuclease.activity..producing.5.phosphomonoesters	0.512495	1	Y37H2A.1
GO.0000178..exosome..RNase.complex.	1	1	NA
GO.0006139..nucleobase.containing.compound.metabolic.process	0.190567	1	Y57A10A.13, ZK973.1, rtel-1, dog-1, chl-1, nft-1
GO.0008408..3.5.exonuclease.activity	0.79506	1	Y57A10A.13, Y37B11A.2
GO.0044237..cellular.metabolic.process	0.884216	1	wrn-1
GO.0000738..DNA.catabolic.process..exonucleolytic	1	1	NA
GO.0003697..single.stranded.DNA.binding	0.694991	1	xpf-1, C34B2.6, mlh-1
GO.0004540..ribonuclease.activity	0.659644	1	ire-1
GO.0032077..positive.regulation.of.deoxyribonuclease.activity	1	1	NA
GO.0004531..deoxyribonuclease.II.activity	0.416563	1	nuc-1
GO.0004817..cysteine.tRNA.ligase.activity	1	1	NA
GO.0006418..tRNA.aminoacylation.for.protein.translation	0.992202	1	prx-10
GO.0006423..cysteinyl.tRNA.aminoacylation	1	1	NA
GO.0005788..endoplasmic.reticulum.lumen	0.765814	1	ges-1, enpl-1
GO.0031581..hemidesmosome.assembly	0.411235	1	pak-1, eel-1, hecd-1
GO.0045471..response.to.ethanol	0.416563	1	odr-8
GO.0007079..mitotic.chromosome.movement.towards.spindle.pole	1	1	NA
GO.0007080..mitotic.metaphase.plate.congression	1	1	NA
GO.1990385..meiotic.spindle.midzone	1	1	NA
GO.1990386..mitotic.cleavage.furrow.ingression	1	1	NA
GO.0030536..larval.feeding.behavior	1	1	NA
GO.0048747..muscle.fiber.development	1	1	NA
GO.0008180..COP9.signalosome	0.762391	1	Y38C1AA.12
GO.0010388..cullin.deneddylation	0.592658	1	Y38C1AA.12
GO.0019784..NEDD8.specific.protease.activity	1	1	NA
GO.0000338..protein.deneddylation	1	1	NA
GO.0031672..A.band	1	1	NA
GO.0097153..cysteine.type.endopeptidase.activity.involved.in.apoptotic.process	1	1	NA
GO.0042383..sarcolemma	1	1	NA
GO.0055074..calcium.ion.homeostasis	1	1	NA
GO.0009055..electron.carrier.activity	0.175617	1	K09H11.1, F15E6.6, F58F9.7, Y45F10A.7, F55B11.1, F54D5.7, acox-1, F08A8.4, acdh-11, ctb-1
GO.0022904..respiratory.electron.transport.chain	0.416563	1	ctb-1
GO.0070469..respiratory.chain	0.923329	1	gas-1, ctb-1
GO.0007031..peroxisome.organization	0.257726	1	ctl-2, prx-10
GO.0004108..citrate..Si..synthase.activity	1	1	NA
GO.0005759..mitochondrial.matrix	0.415461	1	ogdh-1, C08F8.2, F54D5.7, glna-1, C34B2.6, mmcm-1, prx-10, F25B5.6, C16A3.10
GO.0006101..citrate.metabolic.process	1	1	NA
GO.0046912..transferase.activity..transferring.acyl.groups..acyl.groups.converted.into.alkyl.on.transfer	0.416563	1	icl-1
GO.0005375..copper.ion.transmembrane.transporter.activity	0.218393	1	F58G6.7, F27C1.2, cua-1
GO.0006825..copper.ion.transport	0.512495	1	cua-1
GO.0006878..cellular.copper.ion.homeostasis	0.416563	1	cua-1
GO.0030001..metal.ion.transport	0.262252	1	C14H10.1, C06G8.3, hke-4.1, cua-1
GO.0015677..copper.ion.import	1	1	NA
GO.0015680..intracellular.copper.ion.transport	1	1	NA
GO.0016530..metallochaperone.activity	1	1	NA
GO.0016531..copper.chaperone.activity	1	1	NA
GO.0008285..negative.regulation.of.cell.proliferation	0.323797	1	lin-23, puf-6
GO.0010826..negative.regulation.of.centrosome.duplication	0.659644	1	lin-23
GO.0019005..SCF.ubiquitin.ligase.complex	1	1	NA
GO.0031647..regulation.of.protein.stability	0.449732	1	rpm-1, lin-23
GO.0045930..negative.regulation.of.mitotic.cell.cycle	1	1	NA
GO.0019100..male.germ.line.sex.determination	1	1	NA
GO.0019102..male.somatic.sex.determination	0.416563	1	fem-3
GO.0031461..cullin.RING.ubiquitin.ligase.complex	0.416563	1	cul-4
GO.0036369..transcription.factor.catabolic.process	1	1	NA
GO.0042078..germ.line.stem.cell.division	0.801474	1	prg-1
GO.0051232..meiotic.spindle.elongation	1	1	NA
GO.0051759..sister.chromosome.movement.towards.spindle.pole.involved.in.meiotic.sister.chromatid.segregation	0.416563	1	zyg-11
GO.1902104..positive.regulation.of.metaphase.anaphase.transition.of.meiotic.cell.cycle	0.512495	1	zyg-11
GO.0031463..Cul3.RING.ubiquitin.ligase.complex	0.861417	1	tag-147
GO.0044257..cellular.protein.catabolic.process	1	1	NA
GO.0043161..proteasome.mediated.ubiquitin.dependent.protein.catabolic.process	0.238753	1	cdt-2, cul-4, wdr-23, H05L14.2, uev-3, hrdl-1, C09E7.7
GO.0031466..Cul5.RING.ubiquitin.ligase.complex	1	1	NA
GO.0051607..defense.response.to.virus	1	1	NA
GO.0051788..response.to.misfolded.protein	1	1	NA
GO.0097038..perinuclear.endoplasmic.reticulum	1	1	NA
GO.0030100..regulation.of.endocytosis	1	1	NA
GO.0030659..cytoplasmic.vesicle.membrane	0.659644	1	uda-1
GO.0005217..intracellular.ligand.gated.ion.channel.activity	1	1	NA
GO.0010877..lipid.transport.involved.in.lipid.storage	0.301765	1	mrp-4
GO.0036019..endolysosome	1	1	NA
GO.0045806..negative.regulation.of.endocytosis	1	1	NA
GO.0005578..proteinaceous.extracellular.matrix	0.995456	1	madd-4
GO.0030971..receptor.tyrosine.kinase.binding	0.191841	1	shc-1, lin-17
GO.0009948..anterior.posterior.axis.specification	1	1	NA
GO.0010084..specification.of.organ.axis.polarity	1	1	NA
GO.0033564..anterior.posterior.axon.guidance	0.592658	1	lin-17
GO.0060573..cell.fate.specification.involved.in.pattern.specification	1	1	NA
GO.0045859..regulation.of.protein.kinase.activity	0.762391	1	F25B5.5
GO.0000070..mitotic.sister.chromatid.segregation	0.461747	1	dpy-26, pqn-85, capg-1, smc-4
GO.0000079..regulation.of.cyclin.dependent.protein.serine.threonine.kinase.activity	0.659644	1	F25B5.5
GO.0007098..centrosome.cycle	0.512495	1	spd-2
GO.0010389..regulation.of.G2.M.transition.of.mitotic.cell.cycle	1	1	NA
GO.0051383..kinetochore.organization	1	1	NA
GO.0051445..regulation.of.meiotic.cell.cycle	1	1	NA
GO.1904787..positive.regulation.of.asymmetric.protein.localization.involved.in.cell.fate.determination	0.301765	1	wrm-1
GO.0007088..regulation.of.mitotic.nuclear.division	0.301765	1	C34D4.1
GO.0008284..positive.regulation.of.cell.proliferation	0.861417	1	chl-1
GO.0010608..posttranscriptional.regulation.of.gene.expression	0.416563	1	fbf-1
GO.0042023..DNA.endoreduplication	1	1	NA
GO.0048815..hermaphrodite.genitalia.morphogenesis	1	1	NA
GO.1904776..regulation.of.protein.localization.to.cell.cortex	1	1	NA
GO.0016043..cellular.component.organization	0.191841	1	daam-1, cyk-1
GO.0032154..cleavage.furrow	0.301873	1	let-502, nmy-2, cyk-1, pod-1
GO.1902410..mitotic.cytokinetic.process	1	1	NA
GO.1903673..mitotic.cleavage.furrow.formation	1	1	NA
GO.0004843..thiol.dependent.ubiquitin.specific.protease.activity	0.696349	1	otub-4, cyld-1
GO.0016579..protein.deubiquitination	0.463627	1	usp-33, otub-4, usp-48, duo-3, cyld-1
GO.0036459..thiol.dependent.ubiquitinyl.hydrolase.activity	0.461747	1	usp-33, usp-48, duo-3, cyld-1
GO.0097149..centralspindlin.complex	1	1	NA
GO.0000413..protein.peptidyl.prolyl.isomerization	0.992202	1	Y17G9B.4
GO.0003755..peptidyl.prolyl.cis.trans.isomerase.activity	0.992202	1	Y17G9B.4
GO.0016853..isomerase.activity	0.651142	1	B0272.4, gst-42, Y17G9B.4, ipgm-1, gale-1, top-1, mmcm-1, C05D11.5, R05D3.12
GO.0030198..extracellular.matrix.organization	1	1	NA
GO.0005798..Golgi.associated.vesicle	0.416563	1	lrp-1
GO.0030122..AP.2.adaptor.complex	1	1	NA
GO.0031982..vesicle	1	1	NA
GO.0032050..clathrin.heavy.chain.binding	1	1	NA
GO.0004579..dolichyl.diphosphooligosaccharide.protein.glycotransferase.activity	1	1	NA
GO.0008250..oligosaccharyltransferase.complex	1	1	NA
GO.0004675..transmembrane.receptor.protein.serine.threonine.kinase.activity	0.715619	1	sma-6
GO.0004702..receptor.signaling.protein.serine.threonine.kinase.activity	0.416563	1	sma-6
GO.0005024..transforming.growth.factor.beta.activated.receptor.activity	1	1	NA
GO.0007178..transmembrane.receptor.protein.serine.threonine.kinase.signaling.pathway	0.715619	1	sma-6
GO.0007179..transforming.growth.factor.beta.receptor.signaling.pathway	0.363154	1	mab-31, tag-68, sma-4
GO.0061067..negative.regulation.of.dauer.larval.development	0.218393	1	egl-4, lin-29, wts-1
GO.0005009..insulin.activated.receptor.activity	1	1	NA
GO.0010260..organ.senescence	1	1	NA
[truncated: 3,319 more rows]

## Sheet: N3M up vs. F3M
	p.values	FDR.BH	genes
GO.0005840..ribosome	9.87719e-39	5.25269e-35	rps-27, mrpl-39, rpl-39, rps-30, rpl-28, rpl-38, mrps-12, rps-24, rpl-15, mrpl-2, mrps-25, rps-28, rpl-20, rps-25, rps-4, rps-8, mrps-24, rps-5, rps-11, rpl-34, rps-23, rla-2, rpl-29, rps-18, rpl-22, rpl-33, rpl-10, rpl-26, rpl-32, mrps-22, rps-9, mrpl-37, rpl-43, W01D2.1, rpl-17, mrpl-15, rla-1, Y37E3.8, rpl-1, rpl-13, rps-10, rpl-24.1, rpl-19, mrpl-23, rps-17, rpl-25.2, rps-15, rps-19, rpl-14, …
GO.0003735..structural.constituent.of.ribosome	9.22175e-33	2.45206e-29	rps-27, rpl-39, rps-30, rpl-28, rpl-38, mrps-12, rps-24, rpl-15, mrpl-2, mrps-25, rps-28, rpl-20, rps-4, rps-8, mrps-24, ant-1.4, rps-5, rps-11, rpl-34, rps-23, rpl-29, rps-18, misc-1, rpl-22, rpl-33, rpl-10, rpl-26, rpl-32, mrps-22, rps-9, rpl-43, W01D2.1, rpl-17, mrpl-15, rla-1, Y37E3.8, rpl-1, rpl-13, rps-10, rpl-24.1, rpl-19, mrpl-23, rps-17, rpl-25.2, rps-15, rps-19, rpl-14, mrpl-34, rps-7, …
GO.0030529..intracellular.ribonucleoprotein.complex	3.87701e-28	6.87264e-25	rps-27, rpl-39, rpl-28, rpl-38, mrps-12, sup-12, rpl-15, mrps-25, rps-28, rpl-20, rps-25, rps-4, rps-8, mrps-24, rps-5, rps-11, rps-23, rla-2, rps-18, rpl-22, rpl-33, rpl-10, rpl-26, rps-9, rpl-43, W01D2.1, rpl-17, mrpl-15, rla-1, Y37E3.8, rpl-1, rpl-13, rpl-24.1, rpl-19, mrpl-23, rps-17, rpl-25.2, rps-15, rps-19, rps-7, rpl-31, rps-26, rps-22, rpl-16, rps-12, rps-13, mrps-17, rps-14, rpl-36, rps…
GO.0006412..translation	5.6826e-21	7.55501e-18	rps-27, rpl-39, rps-30, rpl-28, rpl-38, mrps-12, rps-24, rpl-15, mrpl-2, rps-28, rpl-20, rps-4, rps-8, mrps-24, ant-1.4, rps-5, rps-11, rpl-34, rps-23, rpl-29, rps-18, misc-1, eif-1, rpl-22, rpl-33, rpl-10, iff-2, rpl-26, rpl-32, rps-9, rpl-43, W01D2.1, rpl-17, mrpl-15, rla-1, rpl-1, rpl-13, rpl-24.1, rpl-19, mrpl-23, rps-17, rpl-25.2, rps-15, rps-19, rpl-14, rps-7, rpl-30, eif-3.E, rpl-31, rps-2…
GO.0042302..structural.constituent.of.cuticle	1.3062e-19	1.38928e-16	col-140, col-43, col-10, col-154, sqt-3, cut-2, col-19, dpy-3, col-165, col-166, col-167, col-172, dpy-7, col-174, col-178, col-179, col-44, col-103, col-107, col-109, col-14, col-117, col-3, col-118, col-119, col-121, col-124, col-125, col-130, col-74, dpy-10, dpy-2, col-77, col-81, ram-2, dpy-14, dpy-17, col-8, col-94, col-96, col-98
GO.0022625..cytosolic.large.ribosomal.subunit	5.13585e-19	4.55208e-16	rpl-39, rpl-28, rpl-38, rpl-15, rpl-20, rpl-34, rpl-29, rpl-22, rpl-33, rpl-10, rpl-26, rpl-32, W01D2.1, Y37E3.8, rpl-13, rpl-24.1, rpl-19, rpl-25.2, rpl-14, rpl-30, rpl-31, rpl-16, rpl-36, rpl-6, rpl-35, rpl-21
GO.0022627..cytosolic.small.ribosomal.subunit	7.48861e-18	5.6892e-15	rps-27, rps-30, rps-24, rps-28, rps-4, rps-8, rps-5, rps-23, rps-9, rps-10, rps-17, rps-15, rps-19, rps-7, rps-26, rps-29, rps-12, rps-13, rps-14, rps-21
GO.0005581..collagen.trimer	5.14937e-15	3.42304e-12	col-140, col-43, col-10, col-154, sqt-3, col-19, col-165, col-166, col-167, col-172, dpy-7, col-174, col-178, col-179, col-44, col-103, col-107, col-109, col-14, col-117, col-118, col-119, col-121, col-124, col-125, col-130, col-74, dpy-10, dpy-2, col-77, col-81, dpy-14, col-8, col-94, col-96, col-98
GO.0005576..extracellular.region	2.3181e-08	1.36974e-05	nlp-31, nlp-30, nlp-29, cri-2, pxn-1, flp-6, mig-17, sqt-3, cut-2, grd-2, col-19, lbp-1, cht-1, lpr-3, asm-2, E01G6.1, hch-1, nas-13, sfrp-1, clec-180, col-14, C06A6.5, unc-129, cwn-2, thn-1, C08F11.12, Y45F10C.2, Y45F10C.4, ins-19, ins-11, ins-2, dpy-10, wrt-1, osm-8, btb-14, F26E4.3, kal-1, dex-1, ZC84.1, K04H4.2, ttr-3, ttr-2, ins-22, ins-23, ttr-15
GO.0015934..large.ribosomal.subunit	7.79226e-08	3.7672e-05	mrpl-2, rpl-26, rpl-17, mrpl-15, rpl-1, rpl-16, mrpl-22
GO.0002181..cytoplasmic.translation	7.7386e-08	3.7672e-05	rpl-15, mrpl-2, rpl-29, rpl-22, rpl-33, rpl-26, rpl-31, rpl-36, rpl-6
GO.0010171..body.morphogenesis	3.06648e-07	0.000135896	cdc-25.2, skr-7, unc-62, col-154, ceh-27, ceh-32, sqt-3, grdn-1, dpy-3, bus-8, hbl-1, ptr-4, hsp-3, col-166, col-167, lam-2, sox-2, dpy-7, sex-1, tni-1, col-44, mua-6, ifa-3, pat-9, fnta-1, nsy-4, glf-1, col-117, col-3, epi-1, col-125, skr-8, mlt-8, hlh-1, eif-1, hlh-14, ifb-1, phb-2, icd-1, dpy-10, dpy-2, ZK1127.5, M195.2, cut-3, R53.4, let-268, rps-9, tac-1, icd-2, lim-7, noah-1, rps-17, C48E7.…
GO.0002119..nematode.larval.development	3.55974e-07	0.000145621	rps-27, cdc-25.2, skr-7, unc-62, F39G3.5, atp-4, egl-46, Y57E12AL.6, rpl-39, rps-30, emo-1, col-154, ceh-27, ceh-32, R04F11.2, tomm-20, sqt-3, rpl-28, ril-1, rpl-38, Y39B6A.33, mlt-11, mrps-12, fkh-2, mls-2, calu-1, acn-1, bus-8, hbl-1, inx-3, ptr-4, hsp-3, lam-2, syd-9, sox-2, ref-2, sex-1, vab-3, lpr-3, ifa-1, mua-6, ifa-3, pat-9, fnta-1, rps-24, rpl-15, mrpl-2, rps-28, tsg-101, rpl-20, glf-1, …
GO.0005622..intracellular	6.59324e-07	0.000250449	rps-27, cdc-25.2, rpl-39, rps-30, rpl-28, rpl-38, mrps-12, asm-2, mig-2, rps-24, rpl-15, mrpl-2, rps-28, T26C12.3, rps-4, rps-8, rps-11, rpl-34, rps-23, rpl-29, rps-18, rpl-22, rpl-33, ubh-4, rpl-10, rpl-32, rps-9, rpl-43, W01D2.1, rla-1, rpl-13, rpl-19, mrpl-23, rps-17, nuo-6, rpl-25.2, rpl-14, rps-7, rpl-30, C01A2.4, rpl-31, rps-26, pll-1, rps-29, ras-2, rps-12, rps-13, rpl-36, rps-21, rpl-6, r…
GO.0018996..molting.cycle..collagen.and.cuticulin.based.cuticle	2.55024e-06	0.000904144	emo-1, grd-2, mlt-11, wrt-2, calu-1, acn-1, bus-8, hog-1, ptr-4, grd-4, hch-1, mua-6, rpl-15, rps-28, grd-10, glf-1, rps-11, rps-23, noah-2, mlt-8, ifb-1, wrt-1, rpl-32, ptr-18, Y51H1A.3, tag-297, icd-2, rps-10, noah-1, E02D9.1, rps-19, rpl-14, E03H4.8, rpl-31, rps-22, rps-14, rps-21, fbn-1, Y47D3B.1, nob-1, Y49E10.4
GO.0040011..locomotion	3.66869e-05	0.0115713	unc-62, F39G3.5, unc-42, col-154, ceh-32, sqt-3, slo-1, grdn-1, grd-2, mlt-11, T04G9.4, dpy-3, wrt-2, cst-1, M03F4.6, calu-1, acn-1, bus-8, hbl-1, hog-1, inx-3, ptr-4, hsp-3, col-166, col-167, mup-2, lam-2, syd-9, sox-2, dpy-7, ref-2, grd-14, grd-4, unc-27, pes-8, F49E2.1, lpr-3, tni-1, nekl-3, C34E7.4, col-44, mua-6, ifa-3, pat-9, ain-1, C06G1.1, fnta-1, col-103, nsy-4, grd-10, unc-5, glf-1, C46…
GO.0005528..FK506.binding	3.69898e-05	0.0115713	fkb-3, fkb-4, fkb-1, fkb-8, fkb-2
GO.0000028..ribosomal.small.subunit.assembly	4.8402e-05	0.0143001	rps-27, rps-5, rps-10, rps-17, rps-19, rps-14
GO.0061077..chaperone.mediated.protein.folding	9.27228e-05	0.024655	fkb-3, fkb-4, fkb-1, fkb-8, fkb-2
GO.0005861..troponin.complex	9.27228e-05	0.024655	tnt-4, mup-2, tnt-3, unc-27, tni-1
GO.0005882..intermediate.filament	0.000105702	0.0267679	ifa-4, ifp-1, ifa-1, mua-6, ifa-3, ifb-2, ifb-1
GO.0000786..nucleosome	0.000120742	0.0291867	hil-3, his-24, hil-7, his-61, his-62, his-60, his-59, his-45, his-66, his-63, hil-8, his-67
GO.0005615..extracellular.space	0.000148386	0.0343094	srp-2, cnc-2, nlp-29, K11G9.1, cri-2, tag-196, flp-6, mig-17, lon-8, ttr-26, ttr-31, ttr-34, sym-1, cpd-2, unc-129, cwn-2, T07G12.3, ttr-50, ttr-45, mlt-10, wrt-1, osm-8, ttr-18, T06A4.3, Y47G6A.19, F26E4.3, ttr-7, ttr-3, ttr-2, ttr-15
GO.0010951..negative.regulation.of.endopeptidase.activity	0.000350648	0.0776977	Y49G5A.1, cri-2, tag-196, B0222.5, Y39B6A.8, mlt-11, E01G6.1, T21D12.12, cpi-1, K10D3.4, ZC84.1
GO.0000413..protein.peptidyl.prolyl.isomerization	0.000478025	0.0977745	fkb-3, fkb-4, cyn-1, cyn-3, fkb-1, fkb-8, fkb-2, cyn-6
GO.0003755..peptidyl.prolyl.cis.trans.isomerase.activity	0.000478025	0.0977745	fkb-3, fkb-4, cyn-1, cyn-3, fkb-1, fkb-8, fkb-2, cyn-6
GO.0035869..ciliary.transition.zone	0.000887504	0.174805	nphp-4, jbts-14, mksr-2, T26A8.2, nphp-1, che-13
GO.0015935..small.ribosomal.subunit	0.00102513	0.194701	mrps-12, rps-5, rps-23, rps-9, rps-15
GO.0042335..cuticle.development	0.00125017	0.229255	cutl-18, H42K12.3, calu-1, ZC449.2, noah-2, noah-1
GO.0004867..serine.type.endopeptidase.inhibitor.activity	0.00189506	0.335931	srp-2, Y49G5A.1, B0222.5, Y39B6A.8, mlt-11, E01G6.1, T21D12.12, K10D3.4, ZC84.1
GO.0045138..nematode.male.tail.tip.morphogenesis	0.00208603	0.357855	lon-8, lin-32, ptr-4, vab-3, mig-2, unc-5, unc-129, iff-2, ram-2, ptr-18, hlh-2, kal-1, nob-1
GO.0005198..structural.molecule.activity	0.00227447	0.360161	ifa-4, stn-2, ifp-1, ifa-1, mua-6, ifa-3, ifb-2, ifb-1, E03H4.8
GO.0006334..nucleosome.assembly	0.00229277	0.360161	hil-3, his-24, hil-7, his-66, hil-8
GO.0005762..mitochondrial.large.ribosomal.subunit	0.00230264	0.360161	mrpl-2, mrpl-15, mrpl-23, mrpl-34, R02F2.9, mrpl-22
GO.0035058..nonmotile.primary.cilium.assembly	0.00254251	0.386317	nphp-4, fkh-2, jbts-14, mksr-2, T26A8.2, nphp-1, che-13
GO.0048666..neuron.development	0.00302826	0.444978	lin-32, zig-4, pop-1, hlh-2, mec-8, tbx-2
GO.0016853..isomerase.activity	0.00309594	0.444978	fkb-3, fkb-4, cyn-1, cyn-3, glf-1, fkb-1, fkb-8, fkb-2, cyn-6, rpia-1, Y49E10.4
GO.0001764..neuron.migration	0.0039349	0.550679	egl-46, mig-2, hch-1, epi-1, ham-1, hlh-14, kal-1
GO.0046982..protein.heterodimerization.activity	0.00405133	0.552436	lin-32, his-61, his-62, his-60, his-59, his-45, his-66, his-63, taf-6.1, hlh-2, his-67
GO.0022404..molting.cycle.process	0.00442833	0.588747	cutl-18, H42K12.3, ZC449.2, noah-2, noah-1
GO.0007423..sensory.organ.development	0.00526111	0.682405	ngn-1, ram-2
GO.0040018..positive.regulation.of.multicellular.organism.growth	0.00662664	0.783121	F39G3.5, rpl-39, bus-18, grd-2, wrt-2, acn-1, hog-1, syd-9, grd-14, grd-4, ifp-1, C34E7.4, rpl-15, grd-10, bus-4, glf-1, sams-5, hpo-12, ntl-2, rpl-22, ins-11, ifb-2, phb-2, wrt-1, wrt-10, nuo-1, rps-17, dpy-14, rpl-30, lam-3, hmg-1.2, ceh-13, trpp-3, dpy-18, nob-1, Y49E10.4
GO.0031966..mitochondrial.membrane	0.00623021	0.783121	phb-2, R53.4, Y82E9BR.3, nduo-6, ndfl-4, nduo-3
GO.0006457..protein.folding	0.00654792	0.783121	fkb-3, fkb-4, cyn-1, cyn-3, C06A6.5, fkb-1, dnj-20, fkb-7, fkb-8, fkb-2, cyn-6, pfd-5, Y49E10.4
GO.0004869..cysteine.type.endopeptidase.inhibitor.activity	0.00645106	0.783121	srp-2, tag-196, cpi-1
GO.0007154..cell.communication	0.00769349	0.87051	dsl-7, grd-2, ncx-3, dsl-6, wrt-1
GO.0006950..response.to.stress	0.00769349	0.87051	C01G10.8, col-121, icd-1, icd-2, epg-6
GO.0006915..apoptotic.process	0.00908024	0.985484	Y32G9B.1, skr-7, ceh-34, atp-4, rpl-39, Y39B6A.34, pes-8, his-24, rpl-15, rps-28, rpl-20, tkr-3, rps-8, his-61, epi-1, rps-5, rps-11, rps-23, noah-2, misc-1, eif-1, rpl-26, gst-5, rps-9, rpl-17, pop-1, rpl-1, rpl-13, rps-10, rpl-19, rps-17, rpl-25.2, rps-15, rps-19, rps-7, eif-3.E, E03H4.8, rpl-31, rps-26, rpl-6, rpl-35, rpl-21, ced-11, trpp-3, vha-1, ubq-2
GO.0018991..oviposition	0.00896184	0.985484	unc-62, grdn-1, elp-1, M03F4.6, acn-1, hbl-1, syd-9, sox-2, dpy-7, ref-2, pes-8, tni-1, ifa-3, ain-1, fnta-1, nsy-4, his-66, F11A10.7, ast-1, C01F1.3, hlh-14, ifb-1, H41C03.1, ZK1127.5, cki-1, lin-28, eya-1, unc-95, nex-3, cnd-1, mlc-3, lin-39, pat-2, Y47D3B.1
GO.0005623..cell	0.428059	1	emo-1, cyn-3, C06A6.5, dpy-18, Y49E10.4
GO.0005942..phosphatidylinositol.3.kinase.complex	1	1	NA
GO.0008286..insulin.receptor.signaling.pathway	1	1	NA
GO.0008340..determination.of.adult.lifespan	0.239695	1	rps-27, sti-1, hsp-16.2, dod-3, unc-62, atp-4, fkb-3, nphp-4, sodh-1, aip-1, ril-1, cst-1, calu-1, set-30, bus-8, ain-1, mksr-2, bus-4, glf-1, C46G7.2, rps-8, npr-35, alp-1, rps-5, rps-11, rpl-34, thn-1, rps-23, dod-24, dod-22, abu-11, eif-1, phb-2, ZK1127.5, aqp-1, F35D2.3, ubh-4, crn-5, C14A4.9, nphp-1, gst-5, nuo-1, gst-20, icd-2, Y54E10BR.4, rps-10, rpl-19, nuo-6, pbs-7, rps-15, F26E4.6, rpl-…
GO.0016301..kinase.activity	0.999996	1	aakg-3, cst-1, F38B2.4, nekl-3, E02H1.6
GO.0016310..phosphorylation	0.999998	1	aakg-3, cst-1, F38B2.4, nekl-3, E02H1.6
GO.0019901..protein.kinase.binding	0.819313	1	mig-2, pop-1
GO.0035014..phosphatidylinositol.3.kinase.regulator.activity	1	1	NA
GO.0040024..dauer.larval.development	0.981691	1	unc-119
GO.0043551..regulation.of.phosphatidylinositol.3.kinase.activity	1	1	NA
GO.0046854..phosphatidylinositol.phosphorylation	1	1	NA
GO.0046935..1.phosphatidylinositol.3.kinase.regulator.activity	1	1	NA
GO.0003333..amino.acid.transmembrane.transport	1	1	NA
GO.0005886..plasma.membrane	0.998378	1	T07F10.1, nmr-2, vang-1, tsp-17, inx-3, stn-2, F47E1.4, inx-2, mig-2, nsy-4, cav-1, inx-6, best-1, lgc-34, wrt-1, pat-4, mnp-1, glr-1
GO.0015171..amino.acid.transmembrane.transporter.activity	1	1	NA
GO.0015179..L.amino.acid.transmembrane.transporter.activity	1	1	NA
GO.0015297..antiporter.activity	1	1	NA
GO.0015807..L.amino.acid.transport	1	1	NA
GO.0016020..membrane	0.863187	1	B0348.2, W03F9.4, Y50D4B.6, ptr-16, cnc-4, cnc-2, Y32G9B.1, Y40B10A.9, nstp-8, dod-3, asp-8, cfz-2, ugt-32, F39G3.5, ugt-13, catp-2, Y58A7A.5, spp-19, fut-2, EGAP9.3, K11G9.5, col-43, F21C10.4, pitr-3, asp-2, K09G1.1, emo-1, T19C4.1, K10D6.2, cutl-18, col-154, bus-18, tomm-20, K01D12.1, C44H9.7, T07F10.1, dsl-7, F35E12.2, ril-1, nmr-2, clec-47, Y36E3A.2, F57A10.4, F44G3.10, F21H7.3, oac-7, slo-1,…
GO.0016021..integral.component.of.membrane	0.776789	1	B0348.2, W03F9.4, Y50D4B.6, cnc-4, cnc-2, Y32G9B.1, Y40B10A.9, nstp-8, dod-3, asp-8, cfz-2, ugt-32, F39G3.5, ugt-13, catp-2, Y58A7A.5, spp-19, fut-2, EGAP9.3, K11G9.5, col-43, F21C10.4, pitr-3, asp-2, K09G1.1, emo-1, T19C4.1, K10D6.2, cutl-18, col-154, bus-18, tomm-20, K01D12.1, C44H9.7, T07F10.1, dsl-7, F35E12.2, ril-1, nmr-2, clec-47, Y36E3A.2, F57A10.4, F44G3.10, F21H7.3, oac-7, slo-1, srw-85,…
GO.1902475..L.alpha.amino.acid.transmembrane.transport	1	1	NA
GO.1990184..amino.acid.transport.complex	1	1	NA
GO.0019915..lipid.storage	0.243268	1	unc-62, acs-2, K02E10.4, igcm-3, T19D2.2, flu-2, ref-2, tnt-3, jbts-14, col-178, col-179, glf-1, rps-8, ric-3, col-117, col-3, col-119, twk-8, cav-1, col-125, rps-11, Y57G7A.8, bath-29, ntl-2, EEED8.2, phb-2, nuo-1, icd-2, hil-8, T09B4.8, F26E4.6, ztf-6, ZK909.3, fbxb-70, F23H11.5, alh-1, rpia-1, glr-1
GO.0008406..gonad.development	0.599842	1	cdc-25.2, hsp-3, lam-2, sox-2, rps-28, rps-8, epi-1, eif-1, phb-2, icd-1, cki-1, nuo-1, cyd-1, icd-2, pop-1, rpl-19, hlh-2, rps-29, hmg-1.2, rps-13, rps-21, rpl-21, spp-1
GO.0009986..cell.surface	0.0612946	1	wrt-1, kal-1, glr-1, pat-2
GO.0000003..reproduction	0.413634	1	rps-27, sti-1, cdc-25.2, Y32G9B.1, atp-4, Y57E12AL.6, rpl-39, rps-30, ZK287.1, emo-1, ceh-27, tomm-20, sqt-3, dsl-7, ril-1, rpl-38, Y39B6A.33, mrps-12, acn-1, hbl-1, inx-3, ptr-4, hsp-3, mup-2, lam-2, syd-9, sox-2, pes-8, sex-1, his-24, fnta-1, rps-24, rpl-15, Y41D4B.26, rps-28, rpl-20, tkr-3, C46G7.2, sams-5, rps-8, his-61, his-59, cav-1, epi-1, rps-5, his-45, dsl-6, his-66, his-63, M04B2.4, rps…
GO.0000278..mitotic.cell.cycle	1	1	NA
GO.0009792..embryo.development.ending.in.birth.or.egg.hatching	0.339977	1	rps-27, cdc-25.2, skr-7, unc-62, F39G3.5, atp-4, F20A1.1, Y57E12AL.6, rpl-39, emo-1, K10D6.2, col-154, ceh-27, ceh-32, R04F11.5, R04F11.2, tomm-20, sqt-3, rpl-28, ril-1, mlt-11, mrps-12, T04G9.4, lin-32, vang-1, cht-1, fkh-2, M03F4.6, bus-8, hbl-1, ptr-4, ilys-5, lam-2, syd-9, sox-2, F47E1.4, tbb-4, ifp-1, sex-1, ifa-1, tni-1, his-24, sym-1, ifa-3, pat-9, fnta-1, rpl-15, mrps-25, tsg-101, rpl-20,…
GO.0040025..vulval.development	0.66652	1	hbl-1, grd-14, ain-1, cwn-2, hlh-2, lin-28, hmg-1.2
GO.0040026..positive.regulation.of.vulval.development	0.306243	1	mig-2, lin-33, pop-1, F26E4.2, hmg-1.2, lin-39
GO.0040035..hermaphrodite.genitalia.development	0.539534	1	unc-62, rpl-38, grdn-1, M03F4.6, acn-1, bus-8, hbl-1, sox-2, ref-2, sex-1, nekl-3, fnta-1, sams-5, his-61, his-62, col-14, epi-1, his-66, F11A10.7, rps-23, ceh-86, ntl-2, ifb-1, icd-1, ZK1127.5, cki-1, iff-2, Y53C12B.2, R53.4, cyd-1, mrpl-37, icd-2, pop-1, Y54E10BR.4, pas-3, mrpl-23, E02D9.1, nuo-6, hlh-2, rpl-25.2, eif-3.E, Y95D11A.1, rpl-31, dpy-17, hmg-1.2, rnp-7, pfd-5, ZK686.1, K12H4.5, mrps…
GO.0098542..defense.response.to.other.organism	1	1	NA
GO.0003674..molecular_function	0.334895	1	cnc-2, col-10, C05G5.5, clec-180, T26A8.2, thn-1, wrt-1, ltd-1, nphp-1, che-13, dex-1, zip-8, rps-14
GO.0006952..defense.response	0.178753	1	tnt-3, col-178, glf-1, fmo-2, dod-22, abu-11, abu-13, spp-1, col-94
GO.0031640..killing.of.cells.of.other.organism	0.0286007	1	nlp-31, nlp-29
GO.0042742..defense.response.to.bacterium	0.0865404	1	nlp-31, nlp-29
GO.0050829..defense.response.to.Gram.negative.bacterium	0.166755	1	cnc-2, F35E12.2, col-179, thn-1, dod-24, dod-22, aqp-1, spp-1
GO.0050830..defense.response.to.Gram.positive.bacterium	0.432856	1	clec-7, clec-218, spp-1
GO.0050832..defense.response.to.fungus	0.0185793	1	cnc-4, cnc-2, nlp-31, nlp-29, cnc-6
GO.0000077..DNA.damage.checkpoint	1	1	NA
GO.0000166..nucleotide.binding	1	1	mrpl-39, catp-2, tbb-6, sup-12, cst-1, hsp-3, tbb-4, tba-8, F49E2.1, F38B2.4, mig-2, nekl-3, rps-24, T26C12.3, sams-5, klp-11, aly-1, F11A10.7, E02H1.6, tba-4, mrpl-23, E02D9.1, rpl-25.2, tba-6, mec-8, ras-2, rnp-7, Y66D12A.7
GO.0004672..protein.kinase.activity	0.999992	1	Y50D4B.6, cst-1, nekl-3, E02D9.1, pat-4, C28A5.6
GO.0004713..protein.tyrosine.kinase.activity	0.986471	1	Y50D4B.6
GO.0004715..non.membrane.spanning.protein.tyrosine.kinase.activity	1	1	NA
GO.0005102..receptor.binding	0.643709	1	grd-2, unc-129, cwn-2
GO.0005515..protein.binding	0.930937	1	sti-1, unc-62, ceh-34, ZK1055.7, sipa-1, tomm-20, cyn-3, slo-1, F53B3.3, sup-12, syd-9, sox-2, cysl-1, vab-3, mig-2, ain-1, fnta-1, mksr-2, tsg-101, sup-36, F20C5.6, T11B7.1, alp-1, F28D1.2, abu-11, ntl-2, ifb-2, ifb-1, icd-1, gst-19, tac-1, icd-2, mppa-1, pop-1, rps-10, lim-7, unc-87, ces-1, mec-8, F26E4.2, nhr-69, ZK1053.4, eya-1, unc-95, pat-4, hmg-1.2, rpl-36, rps-21, rpl-6, glr-1, trpp-3, ep…
GO.0005524..ATP.binding	1	1	catp-2, cst-1, hsp-3, F38B2.4, nekl-3, sams-5, klp-11, E02H1.6, E02D9.1, C28A5.6, Y66D12A.7
GO.0005737..cytoplasm	0.992984	1	sti-1, hsp-16.2, Y57E12AL.6, T07F10.1, aip-1, F22B8.7, elp-1, pfn-3, cht-1, T19D2.2, cst-1, ifa-4, inx-3, flu-2, stn-2, ref-2, tbb-4, tba-8, ifp-1, cysl-1, vab-3, ifa-1, F38B2.4, mig-2, nekl-3, his-24, ifa-3, ain-1, glf-1, spp-10, fmo-2, ham-1, Y49F6B.9, ifb-2, ifb-1, ubh-4, ltd-1, iff-2, tba-4, vps-2, gst-20, tac-1, epg-2, pop-1, Y54E10BR.4, pas-3, hlh-2, lin-28, tba-6, rsbp-1, che-13, eif-3.E, …
GO.0006468..protein.phosphorylation	0.999998	1	Y50D4B.6, cst-1, nekl-3, E02D9.1, pat-4, C28A5.6
GO.0007169..transmembrane.receptor.protein.tyrosine.kinase.signaling.pathway	0.917003	1	Y50D4B.6
GO.0007283..spermatogenesis	0.963845	1	phb-2
GO.0010212..response.to.ionizing.radiation	1	1	NA
GO.0016740..transferase.activity	0.999997	1	ugt-32, ugt-13, fut-2, oac-7, cst-1, bus-8, cysl-1, F38B2.4, nekl-3, fnta-1, mrpl-2, ugt-24, sams-5, gta-1, mboa-4, E02H1.6, gst-5, gst-20, gst-24, gst-19, hhat-1, coq-5, gly-9
GO.0030154..cell.differentiation	0.931119	1	emo-1, lin-32, hlh-1, cyd-1, cnd-1, pgl-2, nob-1
GO.0030336..negative.regulation.of.cell.migration	1	1	NA
GO.0031234..extrinsic.component.of.cytoplasmic.side.of.plasma.membrane	1	1	NA
GO.0038083..peptidyl.tyrosine.autophosphorylation	1	1	NA
GO.0042127..regulation.of.cell.proliferation	0.930176	1	dsl-7, spp-10, epi-1, dsl-6, cki-1
GO.0043066..negative.regulation.of.apoptotic.process	0.528272	1	icd-1, eya-1
GO.0043518..negative.regulation.of.DNA.damage.response..signal.transduction.by.p53.class.mediator	1	1	NA
GO.0045087..innate.immune.response	0.176017	1	C14C6.5, cnc-4, cnc-2, K09D9.1, F39G3.5, ZK1055.7, F35E12.2, F54B8.4, F44G3.10, F53A9.6, col-179, mig-2, thn-1, dod-24, dod-22, ins-11, aqp-1, gst-5, gst-24, F08G2.5, cnc-6, spp-1
GO.1901075..negative.regulation.of.engulfment.of.apoptotic.cell	1	1	NA
GO.0005215..transporter.activity	0.429733	1	lbp-1, F47E1.4, ant-1.4, pept-2, hpo-12, EEED8.2, aqp-1, aqp-2
GO.0006810..transport	0.999057	1	emo-1, tomm-20, nmr-2, slo-1, lbp-1, inx-3, F47E1.4, inx-2, ant-1.4, twk-8, glb-19, pept-2, hpo-12, inx-6, best-1, misc-1, lgc-34, lgc-27, EEED8.2, F58F12.1, aqp-1, ctg-2, aqp-2, R53.4, icd-2, F53F10.3, Y82E9BR.3, glr-1, trpp-3, vha-1, unc-119
GO.0006869..lipid.transport	1	1	NA
GO.0008152..metabolic.process	0.928567	1	W03F9.4, F53E10.1, ugt-32, ugt-13, catp-2, K11G9.1, fkb-3, K07C11.7, ZK287.1, bus-18, tbb-6, fkb-4, C50B6.7, acs-2, F22B8.7, oac-7, D1005.2, dhs-25, hex-1, dhs-26, cht-1, bus-8, C41G11.1, C14F11.6, ilys-5, dhs-29, tbb-4, tba-8, asm-2, ugt-24, klp-11, T07G12.3, F13H10.5, fkb-1, mboa-4, lips-11, lips-17, tba-4, gst-5, W02B12.1, gst-24, gst-19, C31C9.2, K09E4.3, dhs-8, hhat-1, T09B4.8, tba-6, F49D11…
GO.0016246..RNA.interference	0.993095	1	ZK1127.5, pop-1, rpl-25.2, K12H4.5
GO.0016887..ATPase.activity	0.97547	1	hsp-3, klp-11, E02H1.6
GO.0042626..ATPase.activity..coupled.to.transmembrane.movement.of.substances	1	1	NA
GO.0043231..intracellular.membrane.bounded.organelle	0.758819	1	ugt-32, ugt-13, catp-2, ugt-24, ric-3, fmo-2
GO.0055085..transmembrane.transport	0.999948	1	K11G9.5, pitr-3, slo-1, inx-3, inx-2, ant-1.4, ncx-3, hpo-12, inx-6, spp-1
GO.0040020..regulation.of.meiotic.nuclear.division	0.841572	1	dsl-7, spp-10, dsl-6, cki-1
GO.0030176..integral.component.of.endoplasmic.reticulum.membrane	1	1	NA
GO.0030968..endoplasmic.reticulum.unfolded.protein.response	0.325104	1	hsp-3, col-109, abu-11, phb-2, Y41C4A.11
GO.0060465..pharynx.development	0.685853	1	abu-14, lim-7
GO.0001507..acetylcholine.catabolic.process.in.synaptic.cleft	1	1	NA
GO.0003990..acetylcholinesterase.activity	1	1	NA
GO.0004104..cholinesterase.activity	1	1	NA
GO.0006581..acetylcholine.catabolic.process	1	1	NA
GO.0016787..hydrolase.activity	0.997293	1	cdc-25.2, Y46H3A.5, catp-2, K08B12.1, K11G9.1, K07C11.7, tag-196, asp-2, mig-17, C50B6.7, fil-1, ZK262.2, hex-1, R04B3.2, cht-1, C41G11.1, flu-2, asm-2, hch-1, C05G5.5, nas-13, lips-11, H41C03.2, wrt-1, lips-17, ubh-4, pas-3, eya-1, pll-1, lips-3, pcp-1, pcp-5
GO.0030054..cell.junction	0.906369	1	nmr-2, inx-3, inx-2, mua-6, inx-6, glr-1
GO.0040012..regulation.of.locomotion	0.917003	1	sup-12
GO.0042135..neurotransmitter.catabolic.process	0.139872	1	gta-1
GO.0042802..identical.protein.binding	0.938371	1	gta-1, T09B4.8
GO.0043083..synaptic.cleft	1	1	NA
GO.0045202..synapse	0.989851	1	nmr-2, slo-1, glr-1
GO.0052689..carboxylic.ester.hydrolase.activity	0.957946	1	K11G9.1
GO.0007271..synaptic.transmission..cholinergic	0.930284	1	ric-3, lgc-34
GO.0042803..protein.homodimerization.activity	0.612668	1	lin-32, hlh-1, hlh-2
GO.0035188..hatching	0.978701	1	hch-1
GO.0043058..regulation.of.backward.locomotion	0.452738	1	glr-1
GO.0046983..protein.dimerization.activity	0.0266253	1	lin-32, ngn-1, hlh-1, hlh-14, hlh-2, hlh-16, cnd-1
GO.0050879..multicellular.organismal.movement	1	1	NA
GO.0006508..proteolysis	0.179686	1	asp-8, tag-196, asp-2, mig-17, T07F10.1, grd-2, R04B3.2, acn-1, hog-1, hch-1, C05G5.5, nas-13, cpd-2, K08B4.2, cpi-1, wrt-1, ubh-4, ZK930.6, T06A4.3, mppa-1, Y47G6A.19, pas-3, F26E4.3, mnp-1, pcp-1, pcp-5
GO.0008237..metallopeptidase.activity	0.626729	1	mig-17, T07F10.1, acn-1, hch-1, C05G5.5, nas-13, mnp-1
GO.0008241..peptidyl.dipeptidase.activity	0.0725664	1	acn-1
GO.0003723..RNA.binding	0.641724	1	K10C9.3, rpl-39, rpl-38, mrpl-2, rps-4, rpl-34, rps-18, ZK1127.5, iff-2, Y53C12B.2, rps-9, W01D2.1, rpl-1, rpl-13, mrpl-23, E02D9.1, rpl-25.2, rpl-30, mrps-17
GO.0003994..aconitate.hydratase.activity	1	1	NA
GO.0005829..cytosol	0.998646	1	tth-1, sams-5, urm-1, epg-6
GO.0006099..tricarboxylic.acid.cycle	1	1	NA
GO.0006879..cellular.iron.ion.homeostasis	1	1	NA
GO.0016829..lyase.activity	0.995653	1	F49E2.1
GO.0046872..metal.ion.binding	1	1	rps-27, nhr-270, nhr-221, cyp-34A8, catp-2, cri-2, pxn-1, R04B5.5, mig-17, sodh-1, nhr-127, lim-6, hbl-1, unc-27, F49E2.1, sex-1, tni-1, nekl-3, cyp-14A1, hch-1, C05G5.5, nas-13, sams-5, alp-1, tag-273, Y49F6B.9, ltd-1, T24H10.1, let-268, rpl-43, W01D2.1, mppa-1, lim-7, lin-28, ces-1, nhr-69, eya-1, unc-95, gly-9, dpy-18, ctc-2
GO.0051536..iron.sulfur.cluster.binding	0.938644	1	F49E2.1
GO.0051539..4.iron..4.sulfur.cluster.binding	0.528272	1	F49E2.1, nuo-1
GO.0072350..tricarboxylic.acid.metabolic.process	1	1	NA
GO.0005739..mitochondrion	0.152755	1	tomm-20, cyn-1, acs-2, Y39B6A.34, B0250.5, mrps-25, mrps-24, ant-1.4, gta-1, misc-1, phb-2, F58F12.1, icd-1, R53.4, nuo-1, mrpl-37, Y51H1A.3, F53F10.3, T09B4.8, mrpl-23, nuo-6, Y82E9BR.3, har-1, mrps-17, coq-5, mrps-9, mtss-1, Y66D12A.7, nduo-6, ndfl-4, ctc-2, nduo-3
GO.0004889..acetylcholine.activated.cation.selective.channel.activity	0.93383	1	lgc-34
GO.0005216..ion.channel.activity	0.891597	1	nmr-2, slo-1, glr-1
GO.0005230..extracellular.ligand.gated.ion.channel.activity	0.957619	1	lgc-34, lgc-27
GO.0005231..excitatory.extracellular.ligand.gated.ion.channel.activity	1	1	NA
GO.0005892..acetylcholine.gated.channel.complex	0.93383	1	lgc-34
GO.0006811..ion.transport	0.926479	1	nmr-2, slo-1, inx-3, F47E1.4, inx-2, twk-8, inx-6, best-1, lgc-34, lgc-27, F58F12.1, R53.4, Y82E9BR.3, glr-1, vha-1
GO.0007274..neuromuscular.synaptic.transmission	1	1	NA
GO.0015464..acetylcholine.receptor.activity	0.917003	1	lgc-34
GO.0035094..response.to.nicotine	1	1	NA
GO.0042166..acetylcholine.binding	0.93383	1	lgc-34
GO.0043005..neuron.projection	0.345519	1	stn-2, mig-2, ric-3, kcnl-2, rsbp-1, glr-1
GO.0045211..postsynaptic.membrane	0.760525	1	nmr-2, glr-1
GO.0051932..synaptic.transmission..GABAergic	1	1	NA
GO.0098655..cation.transmembrane.transport	0.95487	1	catp-2, lgc-34
GO.0098662..inorganic.cation.transmembrane.transport	1	1	NA
GO.0098703..calcium.ion.import.across.plasma.membrane	1	1	NA
GO.0034220..ion.transmembrane.transport	0.741852	1	nmr-2, lgc-34, lgc-27, aqp-1, aqp-2, glr-1
GO.0007268..chemical.synaptic.transmission	1	1	NA
GO.0042995..cell.projection	0.912104	1	jbts-14, che-13, dex-1
GO.0000281..mitotic.cytokinesis	1	1	NA
GO.0000910..cytokinesis	1	1	NA
GO.0005200..structural.constituent.of.cytoskeleton	0.0152458	1	tbb-6, tbb-4, tba-8, tba-4, tba-6
GO.0005856..cytoskeleton	0.845297	1	elp-1, pfn-3, tbb-4, tba-8, Y38F2AR.10, tba-4, tba-6, che-13
GO.0006898..receptor.mediated.endocytosis	0.871553	1	cdc-25.2, F39G3.5, ceh-22, grdn-1, Y39B6A.33, mup-2, pes-8, mua-6, mrpl-2, sams-5, rps-8, ant-1.4, col-117, col-3, epi-1, R07H5.9, col-125, F11A10.7, rps-18, ntl-2, ifb-1, icd-1, iff-2, let-268, mrps-22, tba-4, cyd-1, epg-2, Y54E10BR.4, pas-3, mrpl-23, nuo-6, rpl-25.2, F26E4.3, eif-3.E, pat-4, Y82E9BR.3, hmg-1.2, K12H4.5, mrps-9, pat-2, vha-1
GO.0007517..muscle.organ.development	0.325373	1	sgcb-1, hlh-1
GO.0030036..actin.cytoskeleton.organization	1	1	NA
GO.0030866..cortical.actin.cytoskeleton.organization	1	1	NA
GO.0040007..growth	0.360376	1	ifp-1, ifa-1, cav-1, ntl-2, ifb-2, ifb-1, Y38E10A.24, epg-2, mrpl-23, Y95D11A.1, K12H4.5, mrps-9, epg-6
GO.0040039..inductive.cell.migration	0.390304	1	vab-3, mig-2, mrpl-2, unc-129, icd-1, tba-4, nuo-1, cyd-1, icd-2, hlh-2, pat-2
GO.0071688..striated.muscle.myosin.thick.filament.assembly	0.399762	1	tnt-3, cysl-1, col-103, C33D9.13, F11A10.7, K05F1.5, Y54E10BR.4, W04A8.4, unc-95, pat-4, pat-2
GO.0005884..actin.filament	1	1	NA
GO.0005938..cell.cortex	0.936309	1	pfn-3, cav-1, ham-1
GO.0007111..meiosis.II.cytokinesis	1	1	NA
GO.0005865..striated.muscle.thin.filament	0.529326	1	unc-87
GO.0045121..membrane.raft	0.726033	1	F35E12.2, cav-1, vha-1
GO.0030033..microvillus.assembly	1	1	NA
GO.0035148..tube.formation	1	1	NA
GO.0097516..microvillar.actin.bundle	1	1	NA
GO.1990357..terminal.web	0.202297	1	ifb-2
GO.0004016..adenylate.cyclase.activity	1	1	NA
GO.0006171..cAMP.biosynthetic.process	1	1	NA
GO.0006935..chemotaxis	1	1	NA
GO.0007188..adenylate.cyclase.modulating.G.protein.coupled.receptor.signaling.pathway	1	1	NA
GO.0007189..adenylate.cyclase.activating.G.protein.coupled.receptor.signaling.pathway	1	1	NA
GO.0007193..adenylate.cyclase.inhibiting.G.protein.coupled.receptor.signaling.pathway	1	1	NA
GO.0007614..short.term.memory	0.409895	1	glr-1
GO.0008219..cell.death	0.471674	1	asp-2, lin-33, icd-1
GO.0009190..cyclic.nucleotide.biosynthetic.process	1	1	NA
GO.0016849..phosphorus.oxygen.lyase.activity	1	1	NA
GO.0019933..cAMP.mediated.signaling	1	1	NA
GO.0030431..sleep	1	1	NA
GO.0035556..intracellular.signal.transduction	0.999857	1	pll-1
GO.0040013..negative.regulation.of.locomotion	0.823439	1	rsbp-1
GO.0040017..positive.regulation.of.locomotion	0.246899	1	lam-2, unc-5, epi-1, pat-2
GO.0072375..medium.term.memory	1	1	NA
GO.0004383..guanylate.cyclase.activity	1	1	NA
GO.0006182..cGMP.biosynthetic.process	1	1	NA
GO.0007165..signal.transduction	0.983708	1	T04F3.2, ptr-4, mig-2, T26C12.3, unc-5, npr-35, arrd-1, ptr-18, H10E21.4, pll-1, ras-2, F43D9.1
GO.0008294..calcium..and.calmodulin.responsive.adenylate.cyclase.activity	1	1	NA
GO.0090038..negative.regulation.of.protein.kinase.C.signaling	1	1	NA
GO.2000114..regulation.of.establishment.of.cell.polarity	1	1	NA
GO.0007186..G.protein.coupled.receptor.signaling.pathway	0.99291	1	cfz-2, C15A7.2, tkr-3, sfrp-1, npr-35
GO.1900195..positive.regulation.of.oocyte.maturation	1	1	NA
GO.0003779..actin.binding	0.866902	1	pfn-3, unc-27, tni-1
GO.0007613..memory	1	1	NA
GO.0007616..long.term.memory	1	1	NA
GO.0014069..postsynaptic.density	0.452738	1	glr-1
GO.0051015..actin.filament.binding	0.651012	1	ncam-1, unc-87
GO.0051016..barbed.end.actin.filament.capping	1	1	NA
GO.0097120..receptor.localization.to.synapse	1	1	NA
GO.2000249..regulation.of.actin.cytoskeleton.reorganization	1	1	NA
GO.0004222..metalloendopeptidase.activity	0.728911	1	mig-17, hch-1, nas-13, K08B4.2, mppa-1
GO.0007229..integrin.mediated.signaling.pathway	0.109994	1	pat-4, pat-2
GO.0008233..peptidase.activity	0.268379	1	asp-8, tag-196, asp-2, mig-17, grd-2, R04B3.2, hog-1, hch-1, C05G5.5, nas-13, cpi-1, wrt-1, ubh-4, pas-3, pcp-1, pcp-5
GO.0022401..negative.adaptation.of.signaling.pathway	1	1	NA
GO.0046959..habituation	0.452738	1	glr-1
GO.0004000..adenosine.deaminase.activity	1	1	NA
GO.0005634..nucleus	0.99939	1	nhr-270, tag-304, nhr-221, unc-62, ceh-34, egl-46, Y57E12AL.6, unc-42, ceh-22, ceh-27, ceh-32, aip-1, F22B8.7, nhr-127, lim-6, lin-32, fkh-2, T19D2.2, ham-2, mls-2, hbl-1, ref-2, hil-3, jmjd-3.1, sex-1, vab-3, his-24, pat-9, sfrp-1, his-61, his-60, his-66, his-63, ham-1, taf-6.1, ceh-86, ast-1, ntl-2, hlh-1, hlh-14, icd-1, ZK1127.5, cki-1, T24H10.1, E02H1.6, Y53C12B.2, ceh-45, pop-1, pas-3, hil-8…
GO.0006382..adenosine.to.inosine.editing	1	1	NA
GO.0006396..RNA.processing	0.797539	1	ZK1127.5, crn-5
GO.0022626..cytosolic.ribosome	1	1	NA
GO.0048477..oogenesis	0.921655	1	unc-62, emo-1, tkr-3, noah-2, phb-2, rps-17, eif-3.E, nex-3, pgl-2
GO.0006397..mRNA.processing	1	1	NA
GO.0003824..catalytic.activity	0.997132	1	F53E10.1, C50B6.7, acs-2, F22B8.7, flu-2, F49E2.1, gta-1, T07G12.3, F13H10.5, ZK1127.5, mppa-1, T09B4.8, Y48A6B.7
GO.0005777..peroxisome	1	1	NA
GO.0006629..lipid.metabolic.process	0.972921	1	Y46H3A.5, K08B12.1, ZK262.2, asm-2, spp-10, H41C03.2, pll-1
GO.0008609..alkylglycerone.phosphate.synthase.activity	1	1	NA
GO.0008610..lipid.biosynthetic.process	1	1	NA
GO.0008611..ether.lipid.biosynthetic.process	1	1	NA
GO.0016491..oxidoreductase.activity	0.927487	1	cyp-34A8, F39G3.5, pxn-1, R04B5.5, sodh-1, B0250.5, dhs-25, dhs-26, dhs-29, cyp-14A1, glf-1, fmo-2, M04B2.4, let-268, dhs-8, dhfr-1, alh-1, dpy-18, qdpr-1, nduo-6, ndfl-4, ctc-2, nduo-3
GO.0016614..oxidoreductase.activity..acting.on.CH.OH.group.of.donors	1	1	NA
GO.0050660..flavin.adenine.dinucleotide.binding	0.983025	1	fmo-2
GO.0055114..oxidation.reduction.process	0.942817	1	cyp-34A8, F39G3.5, pxn-1, R04B5.5, sodh-1, B0250.5, dhs-25, dhs-26, dhs-29, cyp-14A1, glf-1, fmo-2, M04B2.4, let-268, nuo-1, gst-20, C31C9.2, Y51H1A.3, dhs-8, nuo-6, dhfr-1, alh-1, dpy-18, qdpr-1, nduo-6, ndfl-4, ctc-2, nduo-3
GO.0071949..FAD.binding	1	1	NA
GO.0008270..zinc.ion.binding	0.981811	1	nhr-270, nhr-221, ZK287.1, R04B5.5, sodh-1, T07F10.1, aip-1, nhr-127, lim-6, sex-1, hch-1, nas-13, cpd-2, T26C12.3, K08B4.2, alp-1, tag-273, ltd-1, T24H10.1, T06A4.3, mppa-1, Y47G6A.19, lim-7, lin-28, nhr-69, ztf-11, unc-95, rps-29, mnp-1, Y48A6B.7, ZK1010.10
GO.0008361..regulation.of.cell.size	1	1	NA
GO.0030199..collagen.fibril.organization	1	1	NA
GO.0043652..engulfment.of.apoptotic.cell	0.576598	1	ptr-4, mig-2, glf-1, unc-87, nuo-6, C28A5.6
GO.0004871..signal.transducer.activity	0.994716	1	npr-35, pll-1
GO.0014057..positive.regulation.of.acetylcholine.secretion..neurotransmission	1	1	NA
GO.0016079..synaptic.vesicle.exocytosis	1	1	NA
GO.0030163..protein.catabolic.process	0.0333112	1	asp-8, unc-62, egl-46, asp-2, unc-42, sqt-3, mup-2, ifa-3, unc-5, dpy-10, dpy-2, unc-87, pat-4, pat-2, unc-119, ubq-2
GO.0030421..defecation	0.414257	1	lim-6, unc-27, phb-2, nuo-1
GO.0035418..protein.localization.to.synapse	1	1	NA
GO.0060179..male.mating.behavior	1	1	NA
GO.0004930..G.protein.coupled.receptor.activity	0.981307	1	cfz-2, tkr-3, sfrp-1, npr-35
GO.0007218..neuropeptide.signaling.pathway	0.084274	1	nlp-31, nlp-30, nlp-29, flp-6, nlp-24, nlp-26, tkr-3, nlp-16
GO.0008188..neuropeptide.receptor.activity	1	1	NA
GO.2000294..positive.regulation.of.defecation	1	1	NA
GO.0005085..guanyl.nucleotide.exchange.factor.activity	1	1	NA
GO.0007618..mating	1	1	NA
GO.0017112..Rab.guanyl.nucleotide.exchange.factor.activity	1	1	NA
GO.0043547..positive.regulation.of.GTPase.activity	0.99918	1	sipa-1
GO.0004252..serine.type.endopeptidase.activity	0.869446	1	ZK930.6
GO.0003924..GTPase.activity	0.66652	1	tbb-6, tbb-4, tba-8, mig-2, tba-4, tba-6, ras-2
GO.0005525..GTP.binding	0.892367	1	tbb-6, tbb-4, tba-8, F49E2.1, mig-2, T26C12.3, tba-4, tba-6, ras-2
GO.0006886..intracellular.protein.transport	0.865641	1	emo-1, tomm-20, E03H4.8, ras-2, Y41C4A.11
GO.0006913..nucleocytoplasmic.transport	0.93383	1	ras-2
GO.0007264..small.GTPase.mediated.signal.transduction	0.929022	1	mig-2, T26C12.3, ras-2
GO.0008021..synaptic.vesicle	1	1	NA
GO.0015031..protein.transport	0.927147	1	emo-1, tomm-20, mig-2, T26C12.3, tsg-101, pept-2, icd-2, ras-2, unc-119
GO.0030141..secretory.granule	1	1	NA
GO.0032402..melanosome.transport	1	1	NA
GO.0042470..melanosome	1	1	NA
GO.0045921..positive.regulation.of.exocytosis	1	1	NA
GO.0090522..vesicle.tethering.involved.in.exocytosis	1	1	NA
GO.1903364..positive.regulation.of.cellular.protein.catabolic.process	1	1	NA
GO.1990504..dense.core.granule.exocytosis	1	1	NA
GO.0002250..adaptive.immune.response	1	1	NA
GO.0006954..inflammatory.response	1	1	NA
GO.0006979..response.to.oxidative.stress	0.886822	1	pxn-1, phb-2
GO.0007568..aging	1	1	NA
GO.0007611..learning.or.memory	1	1	NA
GO.0014065..phosphatidylinositol.3.kinase.signaling	1	1	NA
GO.0016303..1.phosphatidylinositol.3.kinase.activity	1	1	NA
GO.0016773..phosphotransferase.activity..alcohol.group.as.acceptor	1	1	NA
GO.0030168..platelet.activation	1	1	NA
GO.0031513..nonmotile.primary.cilium	0.700385	1	nphp-4, nsy-4, nphp-1
GO.0035005..1.phosphatidylinositol.4.phosphate.3.kinase.activity	1	1	NA
GO.0036092..phosphatidylinositol.3.phosphate.biosynthetic.process	1	1	NA
GO.0043053..dauer.entry	0.527484	1	vab-3, mec-8, che-13
GO.0046686..response.to.cadmium.ion	1	1	NA
GO.0048015..phosphatidylinositol.mediated.signaling	1	1	NA
GO.0050919..negative.chemotaxis	1	1	NA
GO.0050920..regulation.of.chemotaxis	0.529326	1	mps-2
GO.0060326..cell.chemotaxis	1	1	NA
GO.1901047..insulin.receptor.signaling.pathway.involved.in.determination.of.adult.lifespan	1	1	NA
GO.0001965..G.protein.alpha.subunit.binding	1	1	NA
GO.0005096..GTPase.activator.activity	0.968918	1	sipa-1
GO.0030695..GTPase.regulator.activity	1	1	NA
GO.0050790..regulation.of.catalytic.activity	1	1	NA
GO.0060259..regulation.of.feeding.behavior	1	1	NA
GO.0003684..damaged.DNA.binding	1	1	NA
GO.0003908..methylated.DNA..protein..cysteine.S.methyltransferase.activity	1	1	NA
GO.0006281..DNA.repair	1	1	NA
GO.0006307..DNA.dealkylation.involved.in.DNA.repair	1	1	NA
GO.0016765..transferase.activity..transferring.alkyl.or.aryl..other.than.methyl..groups	1	1	NA
GO.0032259..methylation	0.873552	1	R08E5.3, coq-3, K09E4.3, coq-5
GO.0001085..RNA.polymerase.II.transcription.factor.binding	0.823439	1	egl-46
GO.0001708..cell.fate.specification	0.141962	1	dsl-7, Y41D4B.26, dsl-6, hlh-2, lin-28, hmg-1.2
[truncated: 5,002 more rows]

## Sheet: F3M up vs. N3M
	p.values	FDR.BH	genes
[truncated: 5,318 more rows]
