# Supplementary material for: Self-sperm induce resistance to the detrimental effects of sexual encounters with males in hermaphroditic nematodes
Source: eLife. 2019 Jul 8;8:e46418. doi: 10.7554/eLife.46418 (PMC6697445; doi:10.7554/eLife.46418)
Supplement: Figure 4—source data 1. [file elife-46418-fig4-data1.xlsx]

## Sheet: Description
Intersection of DEseq2 results and CEH-18 binding peaks
MAB-5 (in L2) binding peaks are included as a negative control
Each tab/sheet has the intersectionbetween that differentially expressed genes for a given comparison and direction and CEH-18 binding peaks
For each differential expression comparison, there are two tabs/sheets (one for each direction of expression)
The experimental conditions are abbreviated in the following way:
1. the first letter is the genotype
	F = fem-1[q17]
	N = WT, N2
2. The number is the day that the mating occur
	** Note: the samples were collected 24 hours after mating so the ages of the worms at the time of collection are 1 day older (day 4 or 8 of life)
	3 = for mated C. elegans, mating occurred on day 3; animals frozen for RNA extraction on day 4 of life)
	7 = for mated C. elegans, mating occurred on day 7; animals frozen for RNA extraction on day 8 of life)
3. The last letter is whether or not the animal was mated
	M = C. elegans were mated on the day indicated (with him-5 males labeled with MitoTracker Red CMXRos) and only animals that received male sperm were used
	U = C. elegans never interacted with males but were cultured at the same density as mated animals

## Sheet: N3U_up_N3UvF3U_intersect_CEH-18
seqnames	start	end	width	strand	score	name	thickStart	thickEnd	itemRgb	blockCount	annotation	geneChr	geneStart	geneEnd	geneLength	geneStrand	geneId	transcriptId	distanceToTSS	ENSEMBL	SYMBOL	GENENAME
chrI	69933	70416	484	*	0	.	192.463	-1	3.5824	242	Distal Intergenic	1	71425	80344	8920	1	266817	NM_001306233	-1009	WBGene00000812	csk-1	Tyrosine-protein kinase csk-1
chrI	535352	535501	150	*	0	.	213.365	-1	3.5824	112	Downstream (1-2kb)	1	535808	536493	686	1	171646	NM_001306344	-307	WBGene00022042	icd-2	Nascent polypeptide-associated complex subunit alpha
chrI	933274	933757	484	*	0	.	120.767	-1	3.19746	242	Intron (NR_051858/13187813, intron 2 of 3)	1	938625	941408	2784	1	171676	NM_058393	-4868	WBGene00022383	Y95B8A.2	hypothetical protein
chrI	1435529	1435755	227	*	0	.	348.608	-1	3.5824	126	Distal Intergenic	1	1436292	1441214	4923	1	171710	NM_058453	-537	WBGene00022373	mrpl-15	Mitochondrial Ribosomal Protein, Large
chrI	1823168	1823382	215	*	0	.	329.42	-1	3.5824	114	Promoter	1	1823454	1825905	2452	1	171747	NM_058500	-72	WBGene00022141	chaf-2	CHromatin Assembly Factor
chrI	2299564	2300047	484	*	0	.	169.419	-1	3.5824	242	Promoter	1	2300113	2302633	2521	1	171787	NM_058554	-66	WBGene00021468	epg-2	Ectopic P granules protein 2
chrI	2487667	2488150	484	*	0	.	123.251	-1	3.18573	242	Promoter	1	2488404	2489499	1096	1	171809	NM_001306355	-254	WBGene00001232	eif-3.I	Eukaryotic translation initiation factor 3 subunit I
chrI	2727535	2728018	484	*	0	.	193.424	-1	3.5824	242	Distal Intergenic	1	2727018	2727304	287	1	171834	NM_058631	517	WBGene00004920	snr-7	Probable small nuclear ribonucleoprotein G
chrI	3514223	3514706	484	*	0	.	149.265	-1	3.5824	242	Distal Intergenic	1	3509712	3512659	2948	2	171919	NM_058771	-1564	WBGene00021644	Y47G6A.18	hypothetical protein
chrI	5105962	5106445	484	*	0	.	142.088	-1	3.5824	242	Promoter	1	5105247	5106045	799	2	172139	NM_059119	0	WBGene00003924	pas-3	Proteasome subunit alpha type-4
chrI	6220762	6221245	484	*	0	.	143.772	-1	3.5824	242	Promoter	1	6220149	6220750	602	2	172313	NM_059394	-12	WBGene00004486	rps-17	40S ribosomal protein S17
chrI	7082041	7082524	484	*	0	.	132.413	-1	3.13556	242	Distal Intergenic	1	7080416	7081500	1085	2	172441	NM_059604	-541	WBGene00009050	F22D6.2	hypothetical protein
chrI	7082978	7083145	168	*	0	.	174.115	-1	3.5824	85	Distal Intergenic	1	7080416	7081500	1085	2	172441	NM_059604	-1478	WBGene00009050	F22D6.2	hypothetical protein
chrI	7084385	7084868	484	*	0	.	157.138	-1	3.5824	242	Distal Intergenic	1	7080416	7081500	1085	2	172441	NM_059604	-2885	WBGene00009050	F22D6.2	hypothetical protein
chrI	7314247	7314730	484	*	0	.	121.959	-1	3.19005	242	Promoter	1	7313675	7314274	600	2	3565846	NM_001263542	0	WBGene00008768	F13G3.10	hypothetical protein
chrI	8024468	8024951	484	*	0	.	161.342	-1	3.5824	242	Promoter	1	8023252	8024403	1152	2	172582	NM_059806	-65	WBGene00000869	cyc-1	CYtochrome C
chrI	8409846	8409978	133	*	0	.	249.346	-1	3.5824	38	Promoter	1	8408161	8409731	1571	2	172626	NM_059880	-115	WBGene00003014	lin-28	Protein lin-28
chrI	8411167	8411650	484	*	0	.	129.505	-1	3.15361	242	Distal Intergenic	1	8408161	8410803	2643	2	172626	NM_001025914	-364	WBGene00003014	lin-28	Protein lin-28
chrI	8426831	8426977	147	*	0	.	259.455	-1	3.5824	90	Downstream (<1kb)	1	8425166	8426075	910	2	172629	NM_001128971	-756	WBGene00008530	F02E9.5	hypothetical protein
chrI	8615002	8615485	484	*	0	.	155.395	-1	3.5824	242	Promoter	1	8615393	8616269	877	1	172657	NM_059933	0	WBGene00009668	cfim-1	Cleavage Factor IM (CFIm) homolog
chrI	9474791	9475274	484	*	0	.	221.065	-1	3.5824	242	Promoter	1	9472697	9474779	2083	2	172774	NM_060113	-12	WBGene00009260	calm-1	CALMyrin (Calcium and Integrin Binding protein) homolog
chrI	9688681	9689164	484	*	0	.	204.778	-1	3.5824	242	Promoter	1	9689202	9690046	845	1	172818	NM_060175	-38	WBGene00004426	rpl-14	Ribosomal Protein, Large subunit
chrI	9725208	9725691	484	*	0	.	207.546	-1	3.5824	242	Exon (NM_170911/172823, exon 10 of 10)	1	9727217	9727887	671	1	191616	NM_060185	-1526	WBGene00000430	ceh-5	Homeobox protein ceh-5
chrI	9979802	9979996	195	*	0	.	177.68	-1	3.5824	87	Promoter	1	9976738	9979660	2923	2	172858	NM_060237	-142	WBGene00001226	eif-3.C	Eukaryotic translation initiation factor 3 subunit C
chrI	9988782	9989175	394	*	0	.	505.333	-1	3.5824	204	Promoter	1	9989132	9989515	384	1	172860	NM_060241	0	WBGene00001877	his-68	Histone H2A
chrI	10551405	10551888	484	*	0	.	114.999	-1	3.23053	242	Promoter	1	10551979	10552925	947	1	172938	NM_060359	-91	WBGene00009118	F25H2.4	hypothetical protein
chrI	10590431	10590914	484	*	0	.	138.434	-1	3.5824	242	Promoter	1	10590813	10593840	3028	1	172949	NM_060371	0	WBGene00044070	set-18	SET (trithorax/polycomb) domain containing
chrI	10642406	10642571	166	*	0	.	266.138	-1	3.5824	64	Promoter	1	10640808	10642275	1468	2	172959	NM_060384	-131	WBGene00001228	eif-3.E	Eukaryotic translation initiation factor 3 subunit E
chrI	11203233	11203716	484	*	0	.	128.426	-1	3.15987	242	Distal Intergenic	1	11206986	11211301	4316	1	173014	NM_060476	-3270	WBGene00012317	ztf-6	Zinc finger putative Transcription Factor family
chrI	11204458	11204941	484	*	0	.	119.077	-1	3.20728	242	Distal Intergenic	1	11206986	11211301	4316	1	173014	NM_060476	-2045	WBGene00012317	ztf-6	Zinc finger putative Transcription Factor family
chrI	11293991	11294474	484	*	0	.	123.776	-1	3.18365	242	Promoter	1	11292711	11294152	1442	2	173020	NM_060498	0	WBGene00013181	Y53H1B.2	hypothetical protein
chrI	11517070	11517553	484	*	0	.	158.325	-1	3.5824	242	Promoter	1	11517566	11526562	8997	1	185193	NM_001026269	-13	WBGene00009314	F32B4.4	hypothetical protein
chrI	12664789	12665272	484	*	0	.	151.396	-1	3.5824	242	Promoter	1	12665120	12668734	3615	1	173136	NM_060806	0	WBGene00012037	T26E3.4	hypothetical protein
chrI	12920805	12921288	484	*	0	.	125.067	-1	3.17619	242	Downstream (2-3kb)	1	12922040	12923282	1243	1	173161	NM_060857	-752	WBGene00003989	pfn-1	Profilin-1
chrI	12966835	12966975	141	*	0	.	168.855	-1	3.5824	91	Downstream (<1kb)	1	12964814	12966263	1450	2	173167	NM_001025879	-572	WBGene00006529	tba-2	Tubulin alpha-2 chain
chrI	14113226	14113709	484	*	0	.	135.445	-1	3.12046	242	Promoter	1	14113636	14114003	368	1	173279	NM_061064	0	WBGene00013406	Y63D3A.7	hypothetical protein
chrI	14737234	14737717	484	*	0	.	219.198	-1	3.5824	242	Promoter	1	14737703	14738622	920	1	173337	NM_061164	0	WBGene00010583	K05C4.7	Armadillo repeat-containing protein 1
chrI	14833339	14833822	484	*	0	.	127.599	-1	3.16366	242	Intron (NM_001322695/173355, intron 1 of 10)	1	14829875	14834821	4947	2	173355	NM_001322695	999	WBGene00009304	eva-1	Protein eva-1
chrI	15033869	15034352	484	*	0	.	166.463	-1	3.5824	242	Promoter	1	15034532	15035276	745	1	173372	NM_061221	-180	WBGene00009367	F33H2.3	Acidic leucine-rich nuclear phosphoprotein 32-related protein 1
chrII	24421	24904	484	*	0	.	120.62	-1	3.19893	242	Promoter	2	24771	25381	611	1	3565099	NM_061235	0	WBGene00015291	C01B12.8	hypothetical protein
chrII	66210	66693	484	*	0	.	148.015	-1	3.5824	242	Distal Intergenic	2	69681	70956	1276	1	173392	NM_001313583	-2988	WBGene00001193	egl-26	hypothetical protein
chrII	155905	156388	484	*	0	.	177.314	-1	3.5824	242	Promoter	2	154935	156007	1073	2	173400	NM_061271	0	WBGene00020796	mrpl-28	Mitochondrial Ribosomal Protein, Large
chrII	285593	286076	484	*	0	.	131.529	-1	3.13935	242	Promoter	2	283916	285679	1764	2	173413	NM_061292	0	WBGene00015191	B0432.10	hypothetical protein
chrII	848487	848970	484	*	0	.	121.931	-1	3.19043	242	Promoter	2	846971	848600	1630	2	173466	NM_061431	0	WBGene00017874	acdh-9	Acyl CoA DeHydrogenase
chrII	1134485	1134968	484	*	0	.	146.522	-1	3.5824	242	Distal Intergenic	2	1132368	1134143	1776	2	173499	NM_001322700	-342	WBGene00021104	W09B6.4	hypothetical protein
chrII	4237862	4238345	484	*	0	.	118.153	-1	3.2121	242	Promoter	2	4238213	4244695	6483	1	173758	NM_001026788	0	WBGene00015815	C16A11.2	hypothetical protein
chrII	4299203	4299686	484	*	0	.	206.05	-1	3.5824	242	Promoter	2	4299658	4300718	1061	1	173763	NM_062354	0	WBGene00015297	sco-1	SCO (yeast Suppressor of Cytochrome Oxidase deficiency) homolog
chrII	4376693	4377038	346	*	0	.	335.981	-1	3.5824	160	Distal Intergenic	2	4372946	4375716	2771	2	173773	NM_062371	-977	WBGene00003825	ntl-2	NOT-Like (yeast CCR4/NOT complex component)
chrII	4672547	4673030	484	*	0	.	129.661	-1	3.15259	242	Promoter	2	4673086	4673601	516	1	173805	NM_062424	-56	WBGene00001976	hmg-11	HMG
chrII	4701290	4701773	484	*	0	.	233.92	-1	3.5824	242	Promoter	2	4702069	4703062	994	1	173809	NM_062436	-296	WBGene00006817	unc-85	Probable histone chaperone asf-1
chrII	4701663	4701925	263	*	0	.	206.139	-1	3.5824	120	Promoter	2	4702069	4703062	994	1	173809	NM_062436	-144	WBGene00006817	unc-85	Probable histone chaperone asf-1
chrII	4955362	4955845	484	*	0	.	162.875	-1	3.5824	242	Promoter	2	4954673	4955387	715	2	173858	NM_062512	0	WBGene00003949	pbs-3	Proteasome subunit beta type-3
chrII	5222776	5223259	484	*	0	.	114.343	-1	3.23393	242	Intron (NM_001313591/173894, intron 1 of 9)	2	5214523	5223596	9074	2	173894	NM_001313591	337	WBGene00001101	dsh-1	DiSHevelled related
chrII	5389894	5390377	484	*	0	.	193.499	-1	3.5824	242	Promoter	2	5388917	5389837	921	2	173916	NM_062614	-57	WBGene00003583	ndx-6	Putative nudix hydrolase 6
chrII	6250716	6251199	484	*	0	.	168.674	-1	3.5824	242	Promoter	2	6251415	6252535	1121	1	174034	NM_062849	-216	WBGene00004015	phb-2	Mitochondrial prohibitin complex protein 2
chrII	6303150	6303633	484	*	0	.	217.812	-1	3.5824	242	Promoter	2	6303555	6306209	2655	1	174041	NM_062866	0	WBGene00016210	C29F5.1	hypothetical protein
chrII	6360765	6361248	484	*	0	.	146.309	-1	3.5824	242	Promoter	2	6360373	6360879	507	2	174054	NM_062880	0	WBGene00019607	K10B2.4	Protein Asterix
chrII	6383112	6383595	484	*	0	.	131.49	-1	3.13977	242	Promoter	2	6383653	6384457	805	1	174059	NM_062885	-58	WBGene00019061	F58F12.1	ATP synthase subunit delta, mitochondrial
chrII	6741385	6741868	484	*	0	.	190.879	-1	3.5824	242	Promoter	2	6741736	6742762	1027	1	174111	NM_062975	0	WBGene00018305	exos-8	EXOSome (multiexonuclease complex) component
chrII	7152095	7152255	161	*	0	.	255.668	-1	3.5824	75	Distal Intergenic	2	7152903	7155283	2381	1	174175	NM_063082	-648	WBGene00016173	fust-1	FUS/TLS RNA binding protein homolog
chrII	8329026	8329274	249	*	0	.	337.655	-1	3.5824	148	Promoter	2	8327095	8328869	1775	2	174333	NR_133630	-157	WBGene00001840	hel-1	Spliceosome RNA helicase DDX39B homolog
chrII	8561275	8561629	355	*	0	.	657.863	-1	3.5824	164	Downstream (2-3kb)	2	8559808	8560955	1148	2	174367	NM_063406	-320	WBGene00002065	iff-2	Eukaryotic translation initiation factor 5A-2
chrII	8787481	8787689	209	*	0	.	321.499	-1	3.5824	93	Distal Intergenic	2	8790698	8790912	215	1	174406	NM_063469	-3009	WBGene00008563	F07H5.13	hypothetical protein
chrII	9264833	9265316	484	*	0	.	145.054	-1	3.5824	242	Distal Intergenic	2	9267539	9268296	758	1	174468	NM_063573	-2223	WBGene00007224	C01G6.2	hypothetical protein
chrII	10202240	10202723	484	*	0	.	144.301	-1	3.5824	242	Promoter	2	10201125	10202230	1106	2	174583	NR_000803	-10	NA	tts-2	ncRNA
chrII	10248412	10248712	301	*	0	.	360.482	-1	3.5824	151	Promoter	2	10248991	10250871	1881	1	174590	NM_063809	-279	WBGene00010015	atad-3	ATPase family AAA domain-containing protein 3
chrII	11452945	11453428	484	*	0	.	246.986	-1	3.5824	242	Promoter	2	11451663	11452945	1283	2	174747	NM_064040	0	WBGene00004699	rsp-2	Probable splicing factor, arginine/serine-rich 2
chrII	12040141	12040624	484	*	0	.	143.172	-1	3.5824	242	Downstream (1-2kb)	2	12037254	12039132	1879	2	174844	NM_064162	-1009	WBGene00006601	tpi-1	Triosephosphate isomerase
chrII	13976143	13976626	484	*	0	.	204.311	-1	3.5824	242	Promoter	2	13973932	13976208	2277	2	175048	NM_064525	0	WBGene00012723	Y39G8B.2	hypothetical protein
chrII	14049087	14049570	484	*	0	.	142.382	-1	3.5824	242	Distal Intergenic	2	14060090	14060561	472	1	175056	NM_064541	-10520	WBGene00012187	rpb-11	Probable DNA-directed RNA polymerase II subunit RPB11
chrII	14050432	14050915	484	*	0	.	196.296	-1	3.5824	242	Distal Intergenic	2	14060090	14060561	472	1	175056	NM_064541	-9175	WBGene00012187	rpb-11	Probable DNA-directed RNA polymerase II subunit RPB11
chrII	14059905	14060044	140	*	0	.	182.451	-1	3.5824	73	Promoter	2	14060090	14060561	472	1	175056	NM_064541	-46	WBGene00012187	rpb-11	Probable DNA-directed RNA polymerase II subunit RPB11
chrIII	1080646	1080830	185	*	0	.	204.953	-1	3.5824	100	Promoter	3	1080920	1081258	339	1	175273	NM_064929	-90	WBGene00022357	kbp-4	KNL (kinetochore null) Binding Protein
chrIII	1142747	1143230	484	*	0	.	151.771	-1	3.5824	242	Promoter	3	1143190	1145144	1955	1	175281	NM_001027761	0	WBGene00004891	smr-1	SMN (Survival of Motor Neuron protein) Related
chrIII	1202104	1202587	484	*	0	.	140.09	-1	3.5824	242	Promoter	3	1202551	1205749	3199	1	175285	NM_064947	0	WBGene00022489	Y119D3B.12	hypothetical protein
chrIII	1859650	1859837	188	*	0	.	190.014	-1	3.5824	71	Promoter	3	1859893	1860234	342	1	175331	NM_065066	-56	WBGene00000941	ddp-1	Mitochondrial import inner membrane translocase subunit Tim8
chrIII	2576688	2577171	484	*	0	.	148.581	-1	3.5824	242	Intron (NR_052229/13189113, intron 1 of 1)	3	2573226	2575685	2460	2	190268	NM_065181	-1003	WBGene00021854	Y54F10AR.1	hypothetical protein
chrIII	2768702	2768933	232	*	0	.	295.616	-1	3.5824	122	Promoter	3	2764650	2768665	4016	2	175393	NM_065212	-37	WBGene00022182	swsn-3	SWI/SNF nucleosome remodeling complex component
chrIII	2785929	2786181	253	*	0	.	417.785	-1	3.5824	119	Promoter	3	2782826	2785944	3119	2	175395	NM_065216	0	WBGene00022185	Y71H2AM.20	Serine/threonine-protein phosphatase 2A activator
chrIII	3650572	3651055	484	*	0	.	121.021	-1	3.19636	242	Promoter	3	3650976	3652876	1901	1	175467	NM_001026049	0	WBGene00008117	gsr-1	Glutathione reductase, mitochondrial
chrIII	4019769	4020252	484	*	0	.	137.192	-1	3.10845	242	Promoter	3	4020160	4021777	1618	1	192054	NM_065406	0	WBGene00011367	snpc-3.4	SNAPc (Small Nuclear RNA Activating Complex) homolog
chrIII	4171139	4171276	138	*	0	.	196.6	-1	3.5824	53	Promoter	3	4171340	4172065	726	1	175534	NM_065432	-64	WBGene00007625	C16C10.4	Probable histone deacetylase complex subunit SAP18
chrIII	4280775	4281258	484	*	0	.	147.128	-1	3.5824	242	Downstream (2-3kb)	3	4277354	4279459	2106	2	175551	NM_001267969	-1316	WBGene00006331	sup-26	SUPpressor
chrIII	4504349	4504832	484	*	0	.	158.339	-1	3.5824	242	Intron (NM_171104/175588, intron 2 of 7)	3	4499460	4501177	1718	2	175588	NM_065514	-3172	WBGene00000380	cct-5	T-complex protein 1 subunit epsilon
chrIII	4905256	4905739	484	*	0	.	118.844	-1	3.20853	242	Promoter	3	4904052	4905307	1256	2	184991	NM_065627	0	WBGene00005011	F26F4.8	hypothetical protein
chrIII	5442879	5443362	484	*	0	.	116.984	-1	3.21897	242	Promoter	3	5443167	5446293	3127	1	175748	NM_065759	0	WBGene00018612	disl-2	DIS3-like exonuclease 2
chrIII	5679009	5679279	271	*	0	.	415.448	-1	3.5824	123	Promoter	3	5678062	5678988	927	2	175785	NM_065819	-21	WBGene00018830	ska-3	Spindle and Kinetochore-Associated protein homolog
chrIII	5715496	5715979	484	*	0	.	157.298	-1	3.5824	242	Promoter	3	5716116	5716918	803	1	175801	NM_065834	-137	WBGene00000182	arf-1.2	ADP-ribosylation factor 1-like 2
chrIII	7179608	7180091	484	*	0	.	139.265	-1	3.5824	242	Promoter	3	7179030	7179579	550	2	176006	NM_066171	-29	WBGene00004483	rps-14	40S ribosomal protein S14
chrIII	7520779	7520932	154	*	0	.	217.142	-1	3.5824	50	Promoter	3	7521009	7521332	324	1	182382	NM_066251	-77	WBGene00015579	C07H6.2	hypothetical protein
chrIII	8043766	8044184	419	*	0	.	1223.43	-1	3.5824	199	Downstream (1-2kb)	3	8044487	8044780	294	1	187337	NM_066353	-303	WBGene00019680	K12H4.5	hypothetical protein
chrIII	8126958	8127441	484	*	0	.	133.39	-1	3.13087	242	Downstream (2-3kb)	3	8129591	8130219	629	2	176146	NM_066373	2778	WBGene00004433	rpl-21	60S ribosomal protein L21
chrIII	8319038	8319521	484	*	0	.	172.331	-1	3.5824	242	Promoter	3	8318746	8319138	393	2	176173	NM_066428	0	WBGene00017360	F10E9.11	hypothetical protein
chrIII	8425031	8425514	484	*	0	.	190.5	-1	3.5824	242	Distal Intergenic	3	8426340	8428265	1926	1	176190	NM_066461	-826	WBGene00000414	cec-1	Chromo domain-containing protein cec-1
chrIII	8768031	8768152	122	*	0	.	136.115	-1	3.11628	70	Promoter	3	8768314	8769153	840	1	187502	NM_066534	-162	WBGene00019800	mtss-1	Single-stranded DNA-binding protein, mitochondrial
chrIII	8937613	8937856	244	*	0	.	291.417	-1	3.5824	121	Promoter	3	8937767	8937897	131	1	4927027	NR_003440	0	NA	ZK643.9	ncRNA
chrIII	9052504	9052987	484	*	0	.	129.063	-1	3.15584	242	Exon (NM_066602/176279, exon 2 of 4)	3	9051757	9053784	2028	2	176279	NM_066602	797	WBGene00011300	R107.5	hypothetical protein
chrIII	9053999	9054160	162	*	0	.	272.496	-1	3.5824	20	Promoter	3	9051757	9053784	2028	2	176279	NM_066603	-215	WBGene00011300	R107.5	hypothetical protein
chrIII	9631234	9631717	484	*	0	.	116.989	-1	3.2188	242	Promoter	3	9630475	9631163	689	2	176363	NM_066732	-71	WBGene00006704	ubc-7	Probable ubiquitin-conjugating enzyme E2 7
chrIII	9780567	9781050	484	*	0	.	177.484	-1	3.5824	242	Promoter	3	9781254	9781763	510	1	176383	NM_066764	-204	WBGene00006910	vha-1	V-type proton ATPase 16 kDa proteolipid subunit 1
chrIII	10333888	10334371	484	*	0	.	220.965	-1	3.5824	242	Promoter	3	10332526	10334018	1493	2	259530	NM_001268142	0	WBGene00011563	jmjd-4	JuMonJi (transcription factor) Domain protein
chrIII	10706989	10707472	484	*	0	.	136.282	-1	3.11472	242	Promoter	3	10700792	10707002	6211	2	176493	NR_002375	0	WBGene00012658	Y39A1A.21	hypothetical protein
chrIII	11082559	11083042	484	*	0	.	130.753	-1	3.1454	242	Distal Intergenic	3	11079792	11080373	582	1	176538	NM_067026	2767	WBGene00012357	W09D6.4	hypothetical protein
chrIII	11719368	11719851	484	*	0	.	138.927	-1	3.5824	242	Promoter	3	11718988	11719440	453	2	176605	NM_067116	0	WBGene00001235	elb-1	ELongin B
chrIII	11823387	11823569	183	*	0	.	199.616	-1	3.5824	125	Promoter	3	11823792	11824440	649	1	182788	NM_067131	-223	WBGene00007681	C18D11.3	hypothetical protein
chrIII	11942655	11943138	484	*	0	.	258.755	-1	3.5824	242	Exon (NM_001129263/176629, exon 7 of 12)	3	11934166	11947009	12844	2	176629	NM_001129263	3871	WBGene00013228	Y56A3A.7	hypothetical protein
chrIII	11946314	11946797	484	*	0	.	118.495	-1	3.21014	242	Promoter	3	11934166	11947009	12844	2	176629	NM_001129263	212	WBGene00013228	Y56A3A.7	hypothetical protein
chrIII	12598412	12598895	484	*	0	.	152.5	-1	3.5824	242	Promoter	3	12596145	12598528	2384	2	176678	NM_067239	0	WBGene00013734	Y111B2A.10	hypothetical protein
chrIII	13463006	13463243	238	*	0	.	273.307	-1	3.5824	113	Promoter	3	13463231	13464339	1109	1	176773	NM_001027628	0	WBGene00006439	ant-1.1	Adenine Nucleotide Translocator
chrIII	13643594	13643863	270	*	0	.	360.697	-1	3.5824	137	Promoter	3	13642765	13643538	774	2	259546	NM_067417	-56	WBGene00011730	drr-2	Dietary Restriction Response (WT but not eat-2 lifespan increased)
chrIV	264323	264806	484	*	0	.	138.149	-1	3.5824	242	Promoter	4	262009	264224	2216	2	176848	NM_067490	-99	WBGene00003932	pat-6	Paralyzed arrest at two-fold protein 6
chrIV	385436	385754	319	*	0	.	488.822	-1	3.5824	138	Promoter	4	385909	386549	641	1	176858	NM_067514	-155	WBGene00004493	rps-24	Ribosomal Protein, Small subunit
chrIV	443574	444057	484	*	0	.	177.104	-1	3.5824	242	Promoter	4	443985	444696	712	1	176873	NM_067529	0	WBGene00022045	mrpl-55	Mitochondrial Ribosomal Protein, Large
chrIV	607580	608063	484	*	0	.	234.751	-1	3.5824	242	Intron (NM_171247/182801, intron 1 of 5)	4	606444	613821	7378	1	182801	NM_171246	1136	WBGene00002140	inx-18	Innexin
chrIV	654751	655089	339	*	0	.	623.809	-1	3.5824	166	Promoter	4	653538	654571	1034	2	176891	NM_067563	-180	WBGene00004427	rpl-15	60S ribosomal protein L15
chrIV	1659106	1659399	294	*	0	.	539.171	-1	3.5824	132	Downstream (<1kb)	4	1659704	1659956	253	1	176975	NM_067714	-305	WBGene00004497	rps-28	40S ribosomal protein S28
chrIV	2725743	2726226	484	*	0	.	124.705	-1	3.17734	242	Promoter	4	2720565	2725819	5255	2	177057	NM_001028419	0	WBGene00022381	ubxn-2	UBX domain-containing protein 2
chrIV	3311168	3311651	484	*	0	.	204.691	-1	3.5824	242	Promoter	4	3311568	3312925	1358	1	177099	NM_067917	0	WBGene00021082	zip-11	bZIP transcription factor family
chrIV	3515562	3516045	484	*	0	.	135.355	-1	3.12134	242	Distal Intergenic	4	3516886	3525572	8687	1	177112	NM_001038349	-841	WBGene00006769	unc-33	Protein unc-33
chrIV	4049477	4049960	484	*	0	.	174.091	-1	3.5824	242	Promoter	4	4048123	4049435	1313	2	177161	NM_068065	-42	WBGene00003955	pcn-1	Proliferating cell nuclear antigen
chrIV	4650582	4651065	484	*	0	.	142.457	-1	3.5824	242	Promoter	4	4651059	4651919	861	1	3565767	NM_001027987	0	WBGene00006706	ubc-9	SUMO-conjugating enzyme UBC9
chrIV	4810325	4810808	484	*	0	.	137.099	-1	3.1089	242	Promoter	4	4810936	4811680	745	1	177254	NM_068249	-128	WBGene00019162	eif-1.A	Eukaryotic Initiation Factor
chrIV	6646035	6646279	245	*	0	.	309.959	-1	3.5824	116	Promoter	4	6646414	6646533	120	1	177433	NM_001026113	-135	WBGene00001858	hil-7	HIstone H1 Like
chrIV	6806492	6806975	484	*	0	.	127.184	-1	3.16544	242	Promoter	4	6806874	6809600	2727	1	177446	NM_068644	0	WBGene00015935	C17H12.10	hypothetical protein
chrIV	6919267	6919750	484	*	0	.	124.234	-1	3.18022	242	Promoter	4	6917281	6919398	2118	2	177458	NM_068666	0	WBGene00020687	ruvb-2	RuvB-like 2
chrIV	7486336	7486494	159	*	0	.	161.163	-1	3.5824	106	Promoter	4	7486545	7486916	372	1	186326	NM_068801	-51	WBGene00001936	his-62	Probable histone H2B 4
chrIV	7580112	7580595	484	*	0	.	169.819	-1	3.5824	242	Promoter	4	7578749	7580104	1356	2	177537	NM_068831	-8	WBGene00017993	cec-5	C.Elegans Chromodomain protein
chrIV	7658542	7659025	484	*	0	.	131.116	-1	3.14312	242	Promoter	4	7659060	7664033	4974	1	259578	NM_171381	-35	WBGene00015619	C08G9.1	hypothetical protein
chrIV	7791138	7791621	484	*	0	.	224.046	-1	3.5824	242	Promoter	4	7790104	7791228	1125	2	177566	NM_171383	0	WBGene00004703	rsp-6	Probable splicing factor, arginine/serine-rich 6
chrIV	7817804	7818287	484	*	0	.	165.895	-1	3.5824	242	Promoter	4	7818263	7820746	2484	1	177570	NM_068898	0	WBGene00004363	ric-3	Resistance to inhibitors of cholinesterase protein 3
chrIV	8015829	8016312	484	*	0	.	187.871	-1	3.5824	242	Promoter	4	8016280	8016791	512	1	177599	NM_068941	0	WBGene00016129	C26B2.7	hypothetical protein
chrIV	8687728	8688211	484	*	0	.	193.437	-1	3.5824	242	Promoter	4	8686975	8687809	835	2	177674	NM_069089	0	WBGene00017238	F08B4.7	U1 small nuclear ribonucleoprotein C
chrIV	8757667	8758150	484	*	0	.	126.403	-1	3.16958	242	Promoter	4	8756735	8758204	1470	2	177685	NM_001136382	54	WBGene00002222	klp-11	Kinesin-like protein
chrIV	8762327	8762810	484	*	0	.	131.726	-1	3.13851	242	Distal Intergenic	4	8756735	8761996	5262	2	177685	NM_171407	-331	WBGene00002222	klp-11	Kinesin-like protein
chrIV	8782159	8782642	484	*	0	.	268.73	-1	3.5824	242	Downstream (<1kb)	4	8783377	8784854	1478	2	13197147	NM_001268402	2212	WBGene00194651	C33D9.13	hypothetical protein
chrIV	8850724	8851207	484	*	0	.	238.468	-1	3.5824	242	Distal Intergenic	4	8852514	8860373	7860	1	177701	NM_069132	-1307	WBGene00001132	alp-1	ALP/Enigma encoding
chrIV	9074172	9074655	484	*	0	.	144.646	-1	3.5824	242	Promoter	4	9074677	9076498	1822	1	177725	NM_069175	-22	WBGene00013880	mppb-1	Mitochondrial Processing Peptidase Beta
chrIV	9316004	9316487	484	*	0	.	148.384	-1	3.5824	242	Promoter	4	9314970	9316107	1138	2	177752	NM_069230	0	WBGene00009878	F49C12.9	hypothetical protein
chrIV	11066975	11067458	484	*	0	.	173.765	-1	3.5824	242	Promoter	4	11066081	11067024	944	2	178003	NM_069660	0	WBGene00012383	ttr-17	TransThyretin-Related family domain
chrIV	11068299	11068782	484	*	0	.	216.389	-1	3.5824	242	Distal Intergenic	4	11066081	11067024	944	2	178003	NM_069660	-1275	WBGene00012383	ttr-17	TransThyretin-Related family domain
chrIV	12032419	12032902	484	*	0	.	177.794	-1	3.5824	242	Distal Intergenic	4	12031327	12032026	700	1	188457	NM_069878	1092	WBGene00011740	mrpl-51	39S ribosomal protein L51, mitochondrial
chrIV	12391271	12391397	127	*	0	.	201.956	-1	3.5824	45	Promoter	4	12391594	12392033	440	1	178189	NM_069965	-197	WBGene00009219	dpm-3	Probable dolichol-phosphate mannosyltransferase subunit 3
chrIV	12427611	12428094	484	*	0	.	143.554	-1	3.5824	242	Exon (NM_069971/178193, exon 2 of 2)	4	12427546	12428497	952	2	178193	NM_069971	403	WBGene00000704	col-130	COLlagen
chrIV	13703873	13704356	484	*	0	.	159.659	-1	3.5824	242	Promoter	4	13701774	13703955	2182	2	178338	NM_070246	0	WBGene00006580	tlp-1	T lineage defect, LePtoderan tail
chrIV	13881702	13882185	484	*	0	.	125.767	-1	3.1727	242	Promoter	4	13882242	13882584	343	1	178352	NM_001268834	-57	WBGene00004443	rpl-29	60S ribosomal protein L29
chrIV	14767670	14768153	484	*	0	.	180.363	-1	3.5824	242	Promoter	4	14766870	14767725	856	2	190379	NM_070381	0	WBGene00013324	mrps-7	28S ribosomal protein S7, mitochondrial
chrIV	14794062	14794545	484	*	0	.	142.919	-1	3.5824	242	Intron (NR_131651/178403, intron 1 of 2)	4	14793210	14793620	411	2	178403	NR_131652	-442	WBGene00000763	coq-3	Ubiquinone biosynthesis O-methyltransferase, mitochondrial
chrIV	16398982	16399465	484	*	0	.	117.167	-1	3.21792	242	Promoter	4	16398964	16399477	514	2	178456	NM_001307181	12	WBGene00013418	Y65A5A.1	hypothetical protein
chrV	773169	773652	484	*	0	.	145.944	-1	3.5824	242	Promoter	5	773591	774715	1125	1	178587	NM_070921	0	WBGene00019983	sti-1	Stress-induced-phosphoprotein 1
chrV	1153889	1154372	484	*	0	.	158.833	-1	3.5824	242	Distal Intergenic	5	1156308	1157192	885	1	178614	NM_070985	-1936	WBGene00000552	cmd-1	Calmodulin
chrV	1471243	1471445	203	*	0	.	285.53	-1	3.5824	106	Intron (NR_052229/13189113, intron 1 of 1)	5	1469060	1470962	1903	1	178639	NM_001313187	2183	WBGene00018757	tag-304	hypothetical protein
chrV	4194775	4195258	484	*	0	.	200.642	-1	3.5824	242	Distal Intergenic	5	4195616	4199092	3477	1	178822	NM_171446	-358	WBGene00019276	H43I07.3	hypothetical protein
chrV	4491267	4491750	484	*	0	.	144.9	-1	3.5824	242	Distal Intergenic	5	4497467	4510891	13425	1	178845	NM_001028998	-5717	WBGene00006796	unc-62	Homeobox protein unc-62
chrV	4502583	4503066	484	*	0	.	120.164	-1	3.20149	242	Exon (NM_001028998/178845, exon 5 of 10)	5	4501318	4510891	9574	1	178845	NM_001313278	1265	WBGene00006796	unc-62	Homeobox protein unc-62
chrV	4507832	4508187	356	*	0	.	270.207	-1	3.5824	212	Intron (NM_001028998/178845, intron 8 of 9)	5	4509913	4510891	979	1	178845	NM_001029001	-1726	WBGene00006796	unc-62	Homeobox protein unc-62
chrV	4508010	4508493	484	*	0	.	152.205	-1	3.5824	242	Intron (NM_001028998/178845, intron 8 of 9)	5	4509913	4510891	979	1	178845	NM_001029001	-1420	WBGene00006796	unc-62	Homeobox protein unc-62
chrV	5271452	5271935	484	*	0	.	152.988	-1	3.5824	242	Distal Intergenic	5	5269490	5270584	1095	1	178915	NM_072009	1962	WBGene00015075	B0238.11	hypothetical protein
chrV	5790955	5791118	164	*	0	.	227.051	-1	3.5824	110	Promoter	5	5791235	5791976	742	1	185741	NM_072118	-117	WBGene00018431	F44E7.9	hypothetical protein
chrV	7060479	7060636	158	*	0	.	229.005	-1	3.5824	55	Promoter	5	7059822	7060358	537	2	179092	NM_072391	-121	WBGene00021959	Y57E12AL.6	hypothetical protein
chrV	7237249	7237369	121	*	0	.	189.004	-1	3.5824	58	Promoter	5	7235019	7237126	2108	2	179117	NM_072438	-123	WBGene00015463	hpo-9	hypothetical protein
chrV	7727922	7728563	642	*	0	.	495.868	-1	3.5824	315	Downstream (1-2kb)	5	7728947	7729422	476	1	259630	NM_171482	-384	WBGene00022410	Y97E10C.1	hypothetical protein
chrV	7734873	7735356	484	*	0	.	179.107	-1	3.5824	242	Promoter	5	7733936	7734885	950	2	179150	NM_072598	0	WBGene00020246	clic-1	Clathrin light chain
chrV	8000878	8001272	395	*	0	.	539.566	-1	3.5824	222	Promoter	5	8001463	8004284	2822	1	179174	NM_072657	-191	WBGene00022396	Y97E10AR.1	hypothetical protein
chrV	9095613	9096096	484	*	0	.	233.163	-1	3.5824	242	Promoter	5	9096270	9097128	859	1	179290	NM_072958	-174	WBGene00017659	F21C10.10	hypothetical protein
chrV	10808000	10808218	219	*	0	.	303.626	-1	3.5824	105	Promoter	5	10806197	10807895	1699	2	179500	NM_001269330	-105	WBGene00006481	plrg-1	PLeiotropic ReGulator (vertebrate) homolog
chrV	10897228	10897493	266	*	0	.	319.328	-1	3.5824	161	Promoter	5	10896880	10897135	256	2	179510	NM_073377	-93	WBGene00001303	emo-1	Protein transport protein Sec61 subunit gamma
chrV	11638710	11638874	165	*	0	.	237.947	-1	3.5824	50	Downstream (2-3kb)	5	11631872	11637206	5335	2	179596	NM_001276934	-1504	WBGene00012100	sipa-1	SIPA (vertebrate Signal-Induced Proliferation-Associated) homolog
chrV	12234524	12235007	484	*	0	.	264.452	-1	3.5824	242	Promoter	5	12226968	12234300	7333	2	179676	NM_073664	-224	WBGene00003515	myo-3	Myosin-3
chrV	12235451	12235934	484	*	0	.	139.323	-1	3.5824	242	Distal Intergenic	5	12226968	12234300	7333	2	179676	NM_073664	-1151	WBGene00003515	myo-3	Myosin-3
chrV	12343510	12343993	484	*	0	.	158.476	-1	3.5824	242	Promoter	5	12342481	12343467	987	2	179691	NM_073691	-43	WBGene00009092	tomm-20	Mitochondrial import receptor subunit TOM20 homolog
chrV	12728195	12728678	484	*	0	.	129.803	-1	3.15117	242	Promoter	5	12728631	12729328	698	1	187809	NM_073778	0	WBGene00011247	mrpl-49	Probable 39S ribosomal protein L49, mitochondrial
chrV	12967966	12968086	121	*	0	.	136.344	-1	3.11428	70	Promoter	5	12967381	12967793	413	2	3565661	NM_001028914	-173	WBGene00011309	R186.8	hypothetical protein
chrV	12967997	12968480	484	*	0	.	120.794	-1	3.1971	242	Promoter	5	12967381	12967793	413	2	3565661	NM_001028914	-204	WBGene00011309	R186.8	hypothetical protein
chrV	13808420	13808903	484	*	0	.	228.781	-1	3.5824	242	Downstream (1-2kb)	5	13804758	13807211	2454	2	179876	NM_074017	-1209	WBGene00009977	swan-1	Seven WD repeats, AN11 family
chrV	13961976	13962459	484	*	0	.	165.007	-1	3.5824	242	Promoter	5	13962417	13963791	1375	1	179891	NM_074067	0	WBGene00011194	R10D12.13	hypothetical protein
chrV	14355697	14356180	484	*	0	.	146.846	-1	3.5824	242	Promoter	5	14356081	14356722	642	1	179936	NM_074160	0	WBGene00000877	cyn-1	Peptidyl-prolyl cis-trans isomerase 1
chrV	14423224	14423707	484	*	0	.	128.513	-1	3.15947	242	Promoter	5	14422830	14423298	469	2	182648	NM_074171	0	WBGene00007616	rpoa-12	DNA-directed RNA polymerase subunit
chrV	15085383	15085866	484	*	0	.	266.514	-1	3.5824	242	Promoter	5	15085751	15086827	1077	1	180018	NM_074315	0	WBGene00007234	C01G10.7	hypothetical protein
chrV	15189522	15190005	484	*	0	.	151.164	-1	3.5824	242	Promoter	5	15189952	15190833	882	1	180028	NM_074350	0	WBGene00000879	cyn-3	Peptidyl-prolyl cis-trans isomerase 3
chrV	15511584	15512067	484	*	0	.	154.271	-1	3.5824	242	Promoter	5	15512195	15512679	485	1	180044	NM_074459	-128	WBGene00004452	rpl-38	60S ribosomal protein L38
chrX	535696	536179	484	*	0	.	188.128	-1	3.5824	242	Promoter	6	532286	535747	3462	2	180405	NM_075713	0	WBGene00017898	F28C10.3	hypothetical protein
chrX	593352	593712	361	*	0	.	500.248	-1	3.5824	211	Promoter	6	593980	595787	1808	1	180410	NM_075723	-268	WBGene00017423	F13C5.2	hypothetical protein
chrX	768152	768300	149	*	0	.	196.874	-1	3.5824	103	Promoter	6	767271	768065	795	2	180422	NM_075749	-87	WBGene00020216	trap-2	Translocon-associated protein subunit beta
chrX	876920	877403	484	*	0	.	161.541	-1	3.5824	242	Promoter	6	877280	878975	1696	1	180437	NM_001029798	0	WBGene00022502	ZC13.1	hypothetical protein
chrX	949545	949845	301	*	0	.	463.952	-1	3.5824	131	Distal Intergenic	6	945268	948883	3616	2	180445	NM_075781	-662	WBGene00004893	sms-2	Phosphatidylcholine:ceramide cholinephosphotransferase 2
chrX	1064125	1064323	199	*	0	.	263.35	-1	3.5824	122	Downstream (2-3kb)	6	1057831	1062443	4613	2	180458	NM_075801	-1682	WBGene00006741	unc-1	Protein unc-1
chrX	1081882	1082365	484	*	0	.	217.829	-1	3.5824	242	Downstream (2-3kb)	6	1079546	1080625	1080	2	180460	NM_075804	-1257	WBGene00003991	pfn-3	Profilin-3
chrX	1103653	1104136	484	*	0	.	145.988	-1	3.5824	242	Promoter	6	1104214	1106042	1829	1	180464	NM_075809	-78	WBGene00002062	ife-4	Eukaryotic translation initiation factor 4E-4
chrX	1120238	1120721	484	*	0	.	157.319	-1	3.5824	242	Downstream (1-2kb)	6	1117347	1119397	2051	2	180465	NM_075812	-841	WBGene00015474	C05D9.7	hypothetical protein
chrX	1128432	1128915	484	*	0	.	150.7	-1	3.5824	242	Promoter	6	1129011	1132411	3401	1	180468	NM_075815	-96	WBGene00004927	snx-1	Sorting NeXin
chrX	1302305	1302569	265	*	0	.	294.015	-1	3.5824	118	Distal Intergenic	6	1304585	1308124	3540	1	180473	NM_075838	-2016	WBGene00016871	inso-1	INSOmniac (Drosophila sleep affecting) homolog
chrX	2287814	2288297	484	*	0	.	150.824	-1	3.5824	242	Distal Intergenic	6	2284153	2287188	3036	2	188402	NM_076017	-626	WBGene00020427	sav-1	SAlVador (cell proliferation regulator) homolog
chrX	2495799	2496282	484	*	0	.	124.227	-1	3.1806	242	Promoter	6	2496420	2500650	4231	1	180554	NM_076054	-138	WBGene00019317	K02E10.1	hypothetical protein
chrX	3536838	3537321	484	*	0	.	214.413	-1	3.5824	242	Distal Intergenic	6	3537642	3540622	2981	1	180644	NM_076207	-321	WBGene00006863	gyg-1	Glycogenin-1
chrX	3689268	3689751	484	*	0	.	246.183	-1	3.5824	242	Promoter	6	3684365	3689144	4780	2	180658	NM_076234	-124	WBGene00015356	tag-278	Putative protein tag-278
chrX	3689469	3689952	484	*	0	.	143.769	-1	3.5824	242	Downstream (<1kb)	6	3684365	3689144	4780	2	180658	NM_076234	-325	WBGene00015356	tag-278	Putative protein tag-278
chrX	3694119	3694602	484	*	0	.	174.071	-1	3.5824	242	Distal Intergenic	6	3690330	3693233	2904	2	180659	NM_076235	-886	WBGene00015357	C02F12.8	hypothetical protein
chrX	4457860	4458343	484	*	0	.	117.468	-1	3.21564	242	Promoter	6	4458272	4459120	849	1	184091	NM_076366	0	WBGene00000157	aps-2	AP complex subunit sigma
chrX	5164986	5165469	484	*	0	.	271.374	-1	3.5824	242	Promoter	6	5165411	5168514	3104	1	180787	NM_076476	0	WBGene00020197	mans-3	alpha-1,2-Mannosidase
chrX	5591762	5592245	484	*	0	.	170.176	-1	3.5824	242	Downstream (2-3kb)	6	5593162	5594514	1353	1	180827	NM_076542	-917	WBGene00006826	unc-97	LIM domain-containing protein unc-97
chrX	5592486	5592969	484	*	0	.	157.742	-1	3.5824	242	Promoter	6	5593162	5594514	1353	1	180827	NM_076542	-193	WBGene00006826	unc-97	LIM domain-containing protein unc-97
chrX	6092021	6092289	269	*	0	.	258.152	-1	3.5824	151	Promoter	6	6089391	6091763	2373	2	180880	NM_076618	-258	WBGene00002007	hsp-3	Heat shock 70 kDa protein C
chrX	6250146	6250629	484	*	0	.	231.614	-1	3.5824	242	Intron (NR_050360/13181398, intron 1 of 1)	6	6252274	6253785	1512	1	189229	NR_132542	-1645	NA	W05H9.3	ncRNA
chrX	6252006	6252489	484	*	0	.	153.847	-1	3.5824	242	Promoter	6	6252274	6253785	1512	1	189229	NR_132542	0	NA	W05H9.3	ncRNA
chrX	6254387	6254546	160	*	0	.	168.519	-1	3.5824	57	Intron (NR_050360/13181398, intron 1 of 1)	6	6252274	6253785	1512	1	189229	NR_132542	2113	NA	W05H9.3	ncRNA
chrX	6378352	6378835	484	*	0	.	144.096	-1	3.5824	242	Intron (NR_050360/13181398, intron 1 of 1)	6	6376759	6377654	896	2	180912	NM_076671	-698	WBGene00003053	lmp-1	LAMP family protein lmp-1
chrX	6840807	6841290	484	*	0	.	132.415	-1	3.13534	242	Promoter	6	6841259	6842021	763	1	180956	NM_076751	0	WBGene00000210	asg-2	Probable ATP synthase subunit g 2, mitochondrial
chrX	7264958	7265379	422	*	0	.	474.397	-1	3.5824	177	Promoter	6	7265665	7266934	1270	1	180989	NM_001029505	-286	WBGene00018518	F46H5.2	hypothetical protein
chrX	7500951	7501434	484	*	0	.	219.412	-1	3.5824	242	Promoter	6	7495929	7500976	5048	2	181007	NM_076867	0	WBGene00018604	uggt-1	UDP-Glucose Glycoprotein glucosylTransferase
chrX	8029018	8029501	484	*	0	.	150.337	-1	3.5824	242	Promoter	6	8029499	8031292	1794	1	181060	NM_076950	0	WBGene00016406	C34D10.1	hypothetical protein
chrX	8368094	8368577	484	*	0	.	116.509	-1	3.22246	242	Promoter	6	8368539	8371397	2859	1	181090	NM_077016	0	WBGene00018226	F40B5.2	Putative metallophosphoesterase F40B5.2
chrX	8810929	8811412	484	*	0	.	240.364	-1	3.5824	242	Promoter	6	8806919	8810932	4014	2	181128	NM_077091	0	WBGene00019872	R04E5.9	hypothetical protein
chrX	10684576	10685059	484	*	0	.	206.51	-1	3.5824	242	Distal Intergenic	6	10682040	10682757	718	1	184417	NM_001322630	2536	WBGene00008747	phf-31	PHd Finger family
chrX	11257078	11257561	484	*	0	.	114.573	-1	3.2324	242	Promoter	6	11257493	11259981	2489	1	181314	NM_001029172	0	WBGene00007266	C03A3.1	hypothetical protein
chrX	11379237	11379527	291	*	0	.	331.153	-1	3.5824	283	Downstream (2-3kb)	6	11376161	11377461	1301	2	181329	NM_077505	-1776	WBGene00006584	tni-1	Troponin I 1
chrX	13726857	13727340	484	*	0	.	121.817	-1	3.1921	242	Promoter	6	13727302	13729795	2494	1	181490	NM_001270299	0	WBGene00010776	pix-1	PIX (PAK (p21-activated kinase) Interacting eXchange factor) homolog
chrX	13977428	13977911	484	*	0	.	152.482	-1	3.5824	242	Promoter	6	13977833	13978780	948	1	181507	NM_077926	0	WBGene00009851	F48F7.6	hypothetical protein
chrX	14287792	14288275	484	*	0	.	235.97	-1	3.5824	242	Intron (NM_171799/3565068, intron 3 of 9)	6	14285476	14290940	5465	2	3565068	NM_171799	2665	WBGene00006517	madd-3	Probable dual specificity protein kinase madd-3
chrX	14292771	14292938	168	*	0	.	341.686	-1	3.5824	82	Intron (NM_171798/3565068, intron 2 of 10)	6	14285476	14293993	8518	2	3565068	NM_171798	1055	WBGene00006517	madd-3	Probable dual specificity protein kinase madd-3
chrX	14312385	14312868	484	*	0	.	211.962	-1	3.5824	242	Distal Intergenic	6	14308253	14311669	3417	2	181537	NM_077984	-716	WBGene00007529	C11H1.3	hypothetical protein
chrX	14602606	14603089	484	*	0	.	136.094	-1	3.11672	242	Promoter	6	14603092	14608625	5534	1	181557	NM_001029299	-3	WBGene00001325	eor-2	hypothetical protein
chrX	14841026	14841443	418	*	0	.	430.462	-1	3.5824	188	Distal Intergenic	6	14845944	14848494	2551	1	181580	NM_078061	-4501	WBGene00007772	egrh-1	EGR (Early Growth factor Response factor) Homolog
chrX	15616384	15616867	484	*	0	.	137.515	-1	3.10664	242	Promoter	6	15614419	15616514	2096	2	181652	NM_078174	0	WBGene00010725	erv-46	yeast ERV (ER to Golgi transport Vesicle protein) homolog
chrX	16612276	16613080	805	*	0	.	158.179	-1	3.5824	524	Distal Intergenic	6	16613493	16616247	2755	1	181719	NM_078286	-413	WBGene00015547	ain-1	ALG-1 INteracting protein
chrX	16681911	16682266	356	*	0	.	468.835	-1	3.5824	175	Distal Intergenic	6	16678488	16679797	1310	1	184872	NM_078293	3423	WBGene00017726	F22H10.2	hypothetical protein

## Sheet: F3U_up_N3UvF3U_intersect_CEH-18
seqnames	start	end	width	strand	score	name	thickStart	thickEnd	itemRgb	blockCount	annotation	geneChr	geneStart	geneEnd	geneLength	geneStrand	geneId	transcriptId	distanceToTSS	ENSEMBL	SYMBOL	GENENAME
chrI	518356	518839	484	*	0	.	187.446	-1	3.5824	242	Intron (NM_001306267/171643, intron 1 of 5)	1	511478	519646	8169	2	171643	NM_001306267	807	WBGene00022037	acs-13	fatty Acid CoA Synthetase family
chrI	882711	883109	399	*	0	.	362.424	-1	3.5824	226	Promoter	1	883096	888066	4971	1	171674	NM_001306260	0	WBGene00022386	Y95B8A.6	hypothetical protein
chrI	1481483	1481671	189	*	0	.	294.216	-1	3.5824	121	Distal Intergenic	1	1483106	1490321	7216	1	171715	NM_058459	-1435	WBGene00001115	dyb-1	Dystrobrevin-1
chrI	1481563	1482046	484	*	0	.	121.805	-1	3.19229	242	Distal Intergenic	1	1483106	1490321	7216	1	171715	NM_058459	-1060	WBGene00001115	dyb-1	Dystrobrevin-1
chrI	1836573	1837207	635	*	0	.	505.878	-1	3.5824	362	Intron (NM_170806/171751, intron 1 of 7)	1	1835936	1840888	4953	1	171751	NM_170806	637	WBGene00001196	egl-30	hypothetical protein
chrI	1836573	1837209	637	*	0	.	230.485	-1	3.5824	563	Intron (NM_170806/171751, intron 1 of 7)	1	1835936	1840888	4953	1	171751	NM_170806	637	WBGene00001196	egl-30	hypothetical protein
chrI	2044887	2045370	484	*	0	.	148.019	-1	3.5824	242	Distal Intergenic	1	2034531	2043780	9250	2	245999	NM_058517	-1107	WBGene00021239	Y20F4.4	hypothetical protein
chrI	2291096	2291357	262	*	0	.	360.62	-1	3.5824	161	Distal Intergenic	1	2281620	2289747	8128	2	171784	NM_058551	-1349	WBGene00000408	cdk-7	Cyclin-dependent kinase 7
chrI	2667609	2668092	484	*	0	.	143.205	-1	3.5824	242	Promoter	1	2668168	2670606	2439	1	171827	NM_170836	-76	WBGene00017979	F32B5.6	hypothetical protein
chrI	3386320	3386803	484	*	0	.	139.081	-1	3.5824	242	Promoter	1	3375099	3386380	11282	2	3896724	NM_001262432	0	WBGene00021036	W05F2.4	hypothetical protein
chrI	3516180	3516663	484	*	0	.	138.677	-1	3.5824	242	Promoter	1	3516552	3523250	6699	1	171920	NM_058772	0	WBGene00021636	pcaf-1	P300/CBP Associated Factor homolog
chrI	3721363	3722015	653	*	0	.	470.505	-1	3.5824	298	Distal Intergenic	1	3713764	3721060	7297	2	266825	NM_058805	-303	WBGene00003040	lin-59	Probable histone-lysine N-methyltransferase lin-59
chrI	3740409	3740627	219	*	0	.	264.015	-1	3.5824	128	Promoter	1	3734429	3740334	5906	2	171942	NM_058808	-75	WBGene00004147	larp-5	LARP (RNA binding La related protein) homolog
chrI	4672094	4672577	484	*	0	.	152.953	-1	3.5824	242	Distal Intergenic	1	4666146	4671714	5569	2	172077	NM_001025787	-380	WBGene00006961	xnp-1	Transcriptional regulator ATRX homolog
chrI	4936085	4936568	484	*	0	.	182.565	-1	3.5824	242	Intron (NM_001306369/3565539, intron 3 of 15)	1	4937770	4948941	11172	1	3565539	NM_001306375	-1202	WBGene00017885	dip-2	Disco-Interacting Protein 2 homolog
chrI	4941151	4941582	432	*	0	.	539.921	-1	3.5824	189	Promoter	1	4941658	4948941	7284	1	3565539	NM_001306370	-76	WBGene00017885	dip-2	Disco-Interacting Protein 2 homolog
chrI	5313019	5313488	470	*	0	.	369.958	-1	3.5824	283	Promoter	1	5301768	5313723	11956	2	3565337	NM_001276519	235	WBGene00002717	let-526	hypothetical protein
chrI	5377428	5377911	484	*	0	.	127.429	-1	3.16465	242	Promoter	1	5373409	5377365	3957	2	172187	NM_059180	-63	WBGene00004131	pqn-44	Prion-like-(Q/N-rich)-domain-bearing protein
chrI	5379703	5380186	484	*	0	.	175.921	-1	3.5824	242	Promoter	1	5373409	5379756	6348	2	172187	NM_059179	0	WBGene00004131	pqn-44	Prion-like-(Q/N-rich)-domain-bearing protein
chrI	5997465	5997701	237	*	0	.	390.524	-1	3.5824	150	Intron (NM_059334/172275, intron 3 of 9)	1	5993301	5999150	5850	2	172275	NM_059334	1449	WBGene00006823	unc-94	Tropomodulin
chrI	6000967	6001450	484	*	0	.	161.372	-1	3.5824	242	Promoter	1	5993301	6000774	7474	2	172275	NM_059333	-193	WBGene00006823	unc-94	Tropomodulin
chrI	6073417	6073900	484	*	0	.	128.404	-1	3.16007	242	Intron (NM_059351/172287, intron 8 of 15)	1	6068993	6070122	1130	2	266835	NM_059350	-3295	WBGene00022749	ZK484.3	hypothetical protein
chrI	6572619	6573102	484	*	0	.	128.063	-1	3.16167	242	Distal Intergenic	1	6570089	6572430	2342	1	172376	NM_182051	2530	WBGene00019001	ipgm-1	2,3-bisphosphoglycerate-independent phosphoglycerate mutase
chrI	6579690	6580173	484	*	0	.	124.562	-1	3.17773	242	Promoter	1	6580238	6584460	4223	1	266837	NM_059496	-65	WBGene00002783	let-607	hypothetical protein
chrI	6779992	6780475	484	*	0	.	152.784	-1	3.5824	242	Promoter	1	6774516	6779906	5391	2	172398	NM_059539	-86	WBGene00004111	pqn-21	Prion-like-(Q/N-rich)-domain-bearing protein
chrI	7125517	7126000	484	*	0	.	188.473	-1	3.5824	242	Exon (NM_059617/172450, exon 3 of 10)	1	7123060	7128137	5078	2	172450	NM_059617	2137	WBGene00006753	unc-14	hypothetical protein
chrI	7128275	7128475	201	*	0	.	370.012	-1	3.5824	97	Promoter	1	7123060	7128137	5078	2	172450	NM_059617	-138	WBGene00006753	unc-14	hypothetical protein
chrI	7130773	7131256	484	*	0	.	137.003	-1	3.11025	242	Distal Intergenic	1	7132748	7134174	1427	1	172451	NM_059618	-1492	WBGene00006394	taf-11.2	TAF (TBP-associated transcription factor) family
chrI	7491862	7492345	484	*	0	.	210.035	-1	3.5824	242	Promoter	1	7492364	7492731	368	1	172503	NM_059701	-19	WBGene00012140	T28F4.5	hypothetical protein
chrI	7494193	7494676	484	*	0	.	136.92	-1	3.11093	242	Promoter	1	7486801	7494209	7409	2	172502	NM_001350366	0	WBGene00012139	T28F4.4	hypothetical protein
chrI	7563025	7563508	484	*	0	.	156.205	-1	3.5824	242	Distal Intergenic	1	7564586	7567384	2799	1	172509	NM_059714	-1078	WBGene00012031	T25G3.4	Probable glycerol-3-phosphate dehydrogenase, mitochondrial
chrI	7595489	7595773	285	*	0	.	343.349	-1	3.5824	168	Distal Intergenic	1	7596526	7601903	5378	1	172518	NM_001263616	-753	WBGene00008419	wdr-23	DDB1-and CUL4-associated factor 11 homolog
chrI	7595616	7596099	484	*	0	.	117.141	-1	3.21827	242	Distal Intergenic	1	7596526	7601903	5378	1	172518	NM_001263616	-427	WBGene00008419	wdr-23	DDB1-and CUL4-associated factor 11 homolog
chrI	7866044	7866527	484	*	0	.	117.326	-1	3.2174	242	Promoter	1	7866401	7871883	5483	1	172556	NM_001026416	0	WBGene00011232	pck-2	Phosphoenolypyruvate CarboxyKinase
chrI	7947965	7948448	484	*	0	.	140.329	-1	3.5824	242	Exon (NM_059792/266843, exon 7 of 10)	1	7946944	7951544	4601	2	266843	NM_059792	3096	WBGene00002179	jph-1	JunctoPHilin
chrI	8013296	8013779	484	*	0	.	131.651	-1	3.13872	242	Distal Intergenic	1	8014468	8019071	4604	1	172581	NM_001047180	-689	WBGene00008311	rskn-2	Putative ribosomal protein S6 kinase alpha-2;Ribosomal protein S6 kinase
chrI	8018939	8019422	484	*	0	.	127.563	-1	3.16425	242	Exon (NM_001047180/172581, exon 12 of 12)	1	8018145	8019071	927	1	172581	NM_001047181	794	WBGene00008311	rskn-2	Putative ribosomal protein S6 kinase alpha-2;Ribosomal protein S6 kinase
chrI	8133692	8133991	300	*	0	.	347.358	-1	3.5824	154	Promoter	1	8134144	8134735	592	1	172599	NM_059828	-153	WBGene00012113	T28B8.1	hypothetical protein
chrI	8416014	8416497	484	*	0	.	114.718	-1	3.23189	242	Exon (NM_059882/172627, exon 8 of 8)	1	8416832	8424865	8034	1	172628	NM_001128970	-335	WBGene00004117	sin-3	Paired amphipathic helix protein sin-3
chrI	8747854	8748337	484	*	0	.	131.845	-1	3.13788	242	Downstream (1-2kb)	1	8743849	8746925	3077	2	183252	NM_059965	-929	WBGene00007976	C36B1.9	hypothetical protein
chrI	8786771	8787254	484	*	0	.	196.407	-1	3.5824	242	Distal Intergenic	1	8780265	8785386	5122	2	183975	NM_059975	-1385	WBGene00008439	mfb-1	MAFBx (F-box) protein homolog
chrI	9013922	9014405	484	*	0	.	127.438	-1	3.16445	242	Promoter	1	9009260	9013858	4599	2	172720	NM_001037887	-64	WBGene00009477	rbpl-1	Retinoblastoma Binding Protein Like
chrI	9141528	9142011	484	*	0	.	121.59	-1	3.19303	242	Promoter	1	9138812	9141520	2709	2	172739	NM_060050	-8	WBGene00014119	ZK858.6	Transmembrane 9 superfamily member
chrI	9343708	9344191	484	*	0	.	234.915	-1	3.5824	242	Downstream (<1kb)	1	9335965	9341897	5933	2	172760	NM_001025828	-1811	WBGene00003026	lin-41	Protein lin-41
chrI	9664959	9665442	484	*	0	.	202.43	-1	3.5824	242	Promoter	1	9665311	9668436	3126	1	172814	NM_001025808	0	WBGene00000466	cel-1	mRNA guanylyltransferase
chrI	9685081	9685564	484	*	0	.	141.731	-1	3.5824	242	Promoter	1	9685554	9688592	3039	1	172817	NM_060174	0	WBGene00002069	ikb-1	I Kappa B homolog
chrI	9869279	9869479	201	*	0	.	201.743	-1	3.5824	83	Promoter	1	9869718	9874124	4407	1	172839	NM_181998	-239	WBGene00003639	nhr-49	Nuclear hormone receptor family member nhr-49
chrI	10089060	10089543	484	*	0	.	115.136	-1	3.22968	242	Intron (NM_170918/181944, intron 4 of 9)	1	10086534	10088752	2219	2	181944	NM_001128939	-308	WBGene00007054	scpl-1	CTD small phosphatase-like protein 1
chrI	10232507	10232990	484	*	0	.	135.658	-1	3.11915	242	Downstream (2-3kb)	1	10228220	10231144	2925	2	172891	NM_060293	-1363	WBGene00013709	csnk-1	Casein kinase I gamma
chrI	10297811	10298294	484	*	0	.	211.821	-1	3.5824	242	Promoter	1	10292139	10297846	5708	2	172896	NM_060298	0	WBGene00007047	wts-1	Serine/threonine-protein kinase WARTS homolog
chrI	10468873	10469356	484	*	0	.	161.789	-1	3.5824	242	Intron (NM_001306535/172925, intron 2 of 7)	1	10464597	10468479	3883	2	172925	NM_001306536	-394	WBGene00001112	duo-3	Deubiquitylating with USP/UBP and OTU domains
chrI	10469082	10469565	484	*	0	.	124.383	-1	3.17888	242	Exon (NM_001306535/172925, exon 2 of 8)	1	10464597	10469961	5365	2	172925	NM_001306535	396	WBGene00001112	duo-3	Deubiquitylating with USP/UBP and OTU domains
chrI	12547893	12548376	484	*	0	.	141.702	-1	3.5824	242	Distal Intergenic	1	12551554	12552152	599	1	173125	NM_060779	-3178	WBGene00012216	W02D9.10	hypothetical protein
chrI	12575650	12576133	484	*	0	.	134.289	-1	3.12613	242	Downstream (1-2kb)	1	12568973	12572796	3824	2	173128	NM_001026274	-2854	WBGene00001008	dlk-1	Mitogen-activated protein kinase kinase kinase dlk-1
chrI	13036466	13036949	484	*	0	.	129.477	-1	3.15381	242	Intron (NM_001265120/173177, intron 2 of 3)	1	13035278	13045117	9840	1	173177	NM_001265121	1188	WBGene00012274	W05B5.1	hypothetical protein
chrI	13040392	13040875	484	*	0	.	202.06	-1	3.5824	242	Intron (NM_001265120/173177, intron 2 of 3)	1	13039592	13045117	5526	1	173177	NM_001265122	800	WBGene00012274	W05B5.1	hypothetical protein
chrI	13160835	13161318	484	*	0	.	175	-1	3.5824	242	Promoter	1	13155400	13161500	6101	2	173180	NM_001265156	182	WBGene00009064	F22G12.4	hypothetical protein
chrI	14113023	14113506	484	*	0	.	267.808	-1	3.5824	242	Promoter	1	14104794	14113091	8298	2	173278	NM_061062	0	WBGene00001047	dnj-29	DNaJ domain (prokaryotic heat shock protein)
chrI	14855330	14855813	484	*	0	.	137.035	-1	3.1098	242	Promoter	1	14850140	14855731	5592	2	173358	NM_061193	0	WBGene00000088	aex-5	Endoprotease aex-5
chrII	255229	255463	235	*	0	.	380.78	-1	3.5824	125	Promoter	2	241114	255182	14069	2	173410	NM_061286	-47	WBGene00004166	pqn-85	Nipped-B protein;Nipped-B-like protein pqn-85
chrII	475995	476478	484	*	0	.	147.863	-1	3.5824	242	Promoter	2	476257	477795	1539	1	189277	NR_131402	0	WBGene00021076	W07E6.5	hypothetical protein
chrII	4089164	4089647	484	*	0	.	190.165	-1	3.5824	242	Distal Intergenic	2	4092011	4094081	2071	1	173747	NM_062320	-2364	WBGene00020007	R11F4.1	Probable glycerol kinase
chrII	5055279	5055467	189	*	0	.	300.504	-1	3.5824	107	Promoter	2	5054261	5055155	895	2	173872	NM_062530	-124	WBGene00002068	ify-1	Securin-like protein
chrII	5660942	5661425	484	*	0	.	129.84	-1	3.15096	242	Promoter	2	5661194	5664370	3177	1	173960	NM_170997	0	WBGene00016115	mdt-26	MeDiaTor
chrII	5661766	5662110	345	*	0	.	338.915	-1	3.5824	191	Exon (NM_170997/173960, exon 2 of 8)	2	5661194	5664372	3179	1	173960	NR_151553	572	WBGene00016115	mdt-26	MeDiaTor
chrII	7478768	7478959	192	*	0	.	240.338	-1	3.5824	108	Promoter	2	7476350	7478532	2183	2	174216	NM_001026876	-236	WBGene00000101	aka-1	A Kinase Anchor protein
chrII	7640105	7640588	484	*	0	.	225.98	-1	3.5824	242	Intron (NM_182145/174235, intron 1 of 10)	2	7628064	7642072	14009	2	174235	NM_182145	1484	WBGene00020114	pde-4	Phosphodiesterase;Probable 3',5'-cyclic phosphodiesterase pde-4
chrII	7642157	7642547	391	*	0	.	431.012	-1	3.5824	173	Promoter	2	7641596	7642072	477	2	174235	NM_182147	-85	WBGene00020114	pde-4	Phosphodiesterase;Probable 3',5'-cyclic phosphodiesterase pde-4
chrII	7651154	7651637	484	*	0	.	129.235	-1	3.15483	242	Promoter	2	7628064	7650910	22847	2	174235	NM_001047333	-244	WBGene00020114	pde-4	Phosphodiesterase;Probable 3',5'-cyclic phosphodiesterase pde-4
chrII	7870600	7871083	484	*	0	.	126.197	-1	3.17056	242	Downstream (<1kb)	2	7866870	7870153	3284	2	174269	NM_063255	-447	WBGene00011639	ztf-17	Zinc finger transcription factor family protein 17
chrII	8071745	8072228	484	*	0	.	129.599	-1	3.153	242	Intron (NM_001027150/174296, intron 1 of 7)	2	8068233	8070686	2454	2	174296	NM_001027151	-1059	WBGene00011511	gpcp-2	Putative glycerophosphocholine phosphodiesterase GPCPD1 homolog 2
chrII	9273924	9274407	484	*	0	.	210.211	-1	3.5824	242	Downstream (1-2kb)	2	9271726	9273024	1299	2	182077	NM_063575	-900	WBGene00007226	C01G6.4	hypothetical protein
chrII	9282799	9282984	186	*	0	.	315.868	-1	3.5824	108	Distal Intergenic	2	9275785	9280040	4256	2	174470	NM_063576	-2759	WBGene00007227	C01G6.5	hypothetical protein
chrII	9603509	9603716	208	*	0	.	289.026	-1	3.5824	119	Intron (NM_063665/174512, intron 1 of 9)	2	9598475	9605242	6768	2	174512	NM_063665	1526	WBGene00003618	nhr-19	Nuclear hormone receptor family member nhr-19
chrII	9930958	9931441	484	*	0	.	117.351	-1	3.21669	242	Distal Intergenic	2	9931863	9934364	2502	1	174547	NM_063742	-422	WBGene00007331	pho-11	Putative acid phosphatase 11
chrII	9974931	9975414	484	*	0	.	161.716	-1	3.5824	242	Promoter	2	9971554	9974704	3151	2	174556	NM_063754	-227	WBGene00011276	aakg-5	AMP-Activated protein Kinase Gamma subunit
chrII	10204643	10205126	484	*	0	.	164.817	-1	3.5824	242	Distal Intergenic	2	10206776	10209391	2616	1	174584	NM_063802	-1650	WBGene00011331	T01E8.1	hypothetical protein
chrII	10548877	10549168	292	*	0	.	314.775	-1	3.5824	145	Promoter	2	10544357	10548696	4340	2	174623	NM_063871	-181	WBGene00011304	mnk-1	MAP kinase-interacting serine/threonine-protein kinase mnk-1
chrII	10551885	10552368	484	*	0	.	148.162	-1	3.5824	242	Intron (NM_182124/174623, intron 1 of 6)	2	10544357	10553622	9266	2	174623	NM_182124	1254	WBGene00011304	mnk-1	MAP kinase-interacting serine/threonine-protein kinase mnk-1
chrII	10950064	10950547	484	*	0	.	141.652	-1	3.5824	242	Promoter	2	10950413	10950812	400	1	187537	NM_001267339	0	WBGene00001753	gst-5	Probable glutathione S-transferase 5
chrII	11293367	11293850	484	*	0	.	124.772	-1	3.17696	242	Promoter	2	11290979	11293476	2498	2	174724	NM_064012	0	WBGene00008165	C47G2.4	LMBR1 domain-containing protein 2 homolog
chrII	11724393	11724876	484	*	0	.	147.096	-1	3.5824	242	Downstream (2-3kb)	2	11725323	11726431	1109	1	174798	NM_001356894	-447	WBGene00002262	ldh-1	L-lactate dehydrogenase
chrII	11813871	11814354	484	*	0	.	125.907	-1	3.17173	242	Promoter	2	11812374	11814028	1655	2	174815	NM_064122	0	WBGene00009660	F43G6.8	hypothetical protein
chrII	11980029	11980512	484	*	0	.	115.311	-1	3.229	242	Promoter	2	11980475	11988450	7976	1	174838	NM_001330961	0	WBGene00012458	ash-2	Set1/Ash2 histone methyltransferase complex subunit ash-2
chrII	12089518	12090001	484	*	0	.	115.086	-1	3.23002	242	Downstream (2-3kb)	2	12072302	12088861	16560	2	174848	NM_001027241	-657	WBGene00000565	cnt-1	Truncated ctn-1
chrII	12349620	12350103	484	*	0	.	121.522	-1	3.19377	242	Intron (NM_064222/174875, intron 1 of 5)	2	12345710	12352150	6441	2	174875	NM_064222	2047	WBGene00004310	ras-1	R-RAS related
chrII	13016514	13016682	169	*	0	.	170.043	-1	3.5824	74	Intron (NM_001267434/3565400, intron 3 of 4)	2	13015367	13018782	3416	2	3565400	NM_001267434	2100	WBGene00003144	max-2	Non-specific serine/threonine protein kinase;Serine/threonine-protein kinase max-2
chrII	13199666	13200149	484	*	0	.	150.094	-1	3.5824	242	Promoter	2	13200171	13215433	15263	1	174965	NM_064401	-22	WBGene00000274	btf-1	BTAF (TBP-associated factor) homolog
chrII	13462069	13462329	261	*	0	.	312.548	-1	3.5824	125	Promoter	2	13461277	13462012	736	2	174988	NM_001267462	-57	WBGene00008446	E01G4.3	hypothetical protein
chrII	13469118	13469601	484	*	0	.	229.119	-1	3.5824	242	Promoter	2	13461277	13469602	8326	2	174988	NM_001267461	1	WBGene00008446	E01G4.3	hypothetical protein
chrII	13908526	13909009	484	*	0	.	205.275	-1	3.5824	242	Promoter	2	13908925	13915119	6195	1	175043	NM_064513	0	WBGene00012198	W02B8.2	hypothetical protein
chrII	14143899	14144023	125	*	0	.	137.036	-1	3.10958	59	Promoter	2	14142949	14143822	874	2	175068	NR_051891	-77	WBGene00012228	W03H9.2	hypothetical protein
chrII	14178522	14179005	484	*	0	.	120.139	-1	3.20203	242	Distal Intergenic	2	14180265	14189650	9386	1	175073	NM_064560	-1260	WBGene00012980	efhd-1	EF HanD calcium binding protein
chrII	14528253	14528736	484	*	0	.	219.268	-1	3.5824	242	Promoter	2	14526332	14528220	1889	2	175112	NM_064618	-33	WBGene00010197	F57C2.5	hypothetical protein
chrII	14598304	14598787	484	*	0	.	136.704	-1	3.11205	242	Distal Intergenic	2	14600909	14610412	9504	1	3565050	NM_064634	-2122	WBGene00006603	tps-2	Alpha,alpha-trehalose-phosphate synthase [UDP-forming] 2
chrII	14822348	14822831	484	*	0	.	130.681	-1	3.14644	242	Distal Intergenic	2	14816245	14818523	2279	2	175142	NM_001027211	-3825	WBGene00003651	nhr-61	Nuclear hormone receptor family member nhr-61
chrIII	65440	65923	484	*	0	.	120.525	-1	3.19985	242	Promoter	3	62989	65365	2377	2	175171	NM_181904	-75	WBGene00021043	pck-1	Phosphoenolypyruvate CarboxyKinase
chrIII	67017	67500	484	*	0	.	207.635	-1	3.5824	242	Downstream (1-2kb)	3	63295	66256	2962	2	175171	NM_181906	-761	WBGene00021043	pck-1	Phosphoenolypyruvate CarboxyKinase
chrIII	598056	598539	484	*	0	.	193.251	-1	3.5824	242	Promoter	3	588267	598105	9839	2	175211	NM_001027743	0	WBGene00021906	Y55B1AR.2	hypothetical protein
chrIII	3456296	3456533	238	*	0	.	282.588	-1	3.5824	122	Promoter	3	3456600	3460045	3446	1	175448	NM_065311	-67	WBGene00007921	C34C12.2	hypothetical protein
chrIII	3801378	3801736	359	*	0	.	453.372	-1	3.5824	203	Downstream (<1kb)	3	3790825	3800037	9213	2	175490	NM_001027623	-1341	WBGene00003476	mtm-3	Myotubularin-related protein 3
chrIII	3801544	3802027	484	*	0	.	159.422	-1	3.5824	242	Downstream (<1kb)	3	3790825	3800037	9213	2	175490	NM_001027623	-1507	WBGene00003476	mtm-3	Myotubularin-related protein 3
chrIII	4193737	4193917	181	*	0	.	222.548	-1	3.5824	107	Promoter	3	4193983	4194950	968	1	175541	NM_001083177	-66	WBGene00006959	xbp-1	X-box Binding Protein homolog
chrIII	4723874	4724357	484	*	0	.	126.902	-1	3.16702	242	Intron (NM_065569/175622, intron 1 of 12)	3	4722212	4730564	8353	1	175622	NM_065569	1662	WBGene00000068	acy-1	Adenylyl CYclase
chrIII	5108731	5109214	484	*	0	.	138.246	-1	3.5824	242	Distal Intergenic	3	5109701	5130543	20843	1	175697	NM_171117	-487	WBGene00004728	sax-2	Sensory AXon guidance
chrIII	5202557	5203040	484	*	0	.	131.821	-1	3.13809	242	Downstream (<1kb)	3	5196968	5199660	2693	2	175710	NM_065702	-2897	WBGene00001262	emb-8	NADPH--cytochrome P450 reductase
chrIII	5845527	5846010	484	*	0	.	131.898	-1	3.13767	242	Downstream (2-3kb)	3	5848944	5853263	4320	2	175818	NM_065859	7253	WBGene00017162	ddx-23	DEAD boX helicase homolog
chrIII	5846522	5847005	484	*	0	.	114.499	-1	3.23291	242	Downstream (1-2kb)	3	5848944	5853263	4320	2	175818	NM_065859	6258	WBGene00017162	ddx-23	DEAD boX helicase homolog
chrIII	5949790	5950273	484	*	0	.	157.193	-1	3.5824	242	Promoter	3	5950449	5953221	2773	1	175843	NM_065893	-176	WBGene00017775	F25B5.3	5'-nucleotidase;Putative cytosolic 5'-nucleotidase 3;hypothetical protein
chrIII	6170054	6170537	484	*	0	.	164.034	-1	3.5824	242	Intron (NM_001027403/259512, intron 3 of 4)	3	6165289	6168530	3242	2	175871	NM_001027402	-1524	WBGene00001160	efk-1	Eukaryotic elongation factor 2 kinase
chrIII	6303091	6303574	484	*	0	.	165.771	-1	3.5824	242	Distal Intergenic	3	6299797	6302496	2700	2	175892	NM_065981	-595	WBGene00018564	F47D12.9	Uncharacterized WD repeat-containing protein F47D12.9
chrIII	6551428	6551911	484	*	0	.	197.232	-1	3.5824	242	Promoter	3	6546910	6551229	4320	2	175930	NM_066045	-199	WBGene00015641	C09E7.7	hypothetical protein
chrIII	6895081	6895564	484	*	0	.	185.835	-1	3.5824	242	Distal Intergenic	3	6898040	6900404	2365	1	175961	NM_066100	-2476	WBGene00020315	T07E3.4	hypothetical protein
chrIII	6897584	6898067	484	*	0	.	140.975	-1	3.5824	242	Promoter	3	6898040	6900404	2365	1	175961	NM_066100	0	WBGene00020315	T07E3.4	hypothetical protein
chrIII	6988004	6988487	484	*	0	.	254.109	-1	3.5824	242	Distal Intergenic	3	6990356	7002175	11820	1	175980	NM_001276777	-1869	WBGene00004182	prk-1	Pim (mammalian oncogene) Related Kinase
chrIII	7153888	7154371	484	*	0	.	121.766	-1	3.19266	242	Promoter	3	7146469	7153770	7302	2	176000	NM_001047395	-118	WBGene00003858	ogt-1	UDP-N-acetylglucosamine--peptide N-acetylglucosaminyltransferase
chrIII	7155759	7155898	140	*	0	.	342.346	-1	3.5824	75	Downstream (<1kb)	3	7146469	7153770	7302	2	176000	NM_001047395	-1989	WBGene00003858	ogt-1	UDP-N-acetylglucosamine--peptide N-acetylglucosaminyltransferase
chrIII	7181779	7182262	484	*	0	.	124.393	-1	3.17869	242	Promoter	3	7182306	7183816	1511	1	176009	NM_066174	-44	WBGene00018150	epg-4	Ectopic P granules protein 4
chrIII	7335329	7335609	281	*	0	.	398.35	-1	3.5824	123	Promoter	3	7330225	7335117	4893	2	176040	NM_171882	-212	WBGene00018953	F56C9.10	hypothetical protein
chrIII	7498449	7498717	269	*	0	.	271.488	-1	3.5824	121	Downstream (<1kb)	3	7498833	7499338	506	2	176062	NM_066246	621	WBGene00015582	C07H6.9	hypothetical protein
chrIII	7710047	7710530	484	*	0	.	139.974	-1	3.5824	242	Distal Intergenic	3	7700625	7709472	8848	2	176083	NM_066277	-575	WBGene00003002	lin-13	Zinc finger protein lin-13
chrIII	7710876	7711359	484	*	0	.	140.8	-1	3.5824	242	Distal Intergenic	3	7712367	7717300	4934	1	182155	NM_066278	-1008	WBGene00015386	C03B8.3	hypothetical protein
chrIII	8356516	8356734	219	*	0	.	268.676	-1	3.5824	120	Downstream (<1kb)	3	8352055	8355095	3041	2	176179	NM_066441	-1421	WBGene00006840	unc-116	Kinesin heavy chain
chrIII	8794768	8795251	484	*	0	.	140.582	-1	3.5824	242	Intron (NR_136383/176237, intron 5 of 14)	3	8792847	8806271	13425	1	176237	NR_136383	1921	WBGene00006975	zfp-1	Zinc Finger Protein
chrIII	8801608	8802373	766	*	0	.	595.168	-1	3.5824	460	Intron (NR_136383/176237, intron 10 of 14)	3	8802954	8805625	2672	1	176237	NM_001027440	-581	WBGene00006975	zfp-1	Zinc Finger Protein
chrIII	8886311	8886794	484	*	0	.	122.2	-1	3.18893	242	Distal Intergenic	3	8883016	8885473	2458	2	176250	NM_066559	-838	WBGene00014021	svop-1	Putative transporter svop-1
chrIII	9703774	9704257	484	*	0	.	227.417	-1	3.5824	242	Intron (NM_066744/176369, intron 1 of 7)	3	9704942	9709398	4457	1	176369	NM_001047379	-685	WBGene00006579	tlk-1	Serine/threonine-protein kinase tousled-like 1
chrIII	9905378	9905861	484	*	0	.	135.903	-1	3.11782	242	Intron (NM_001268117/176401, intron 1 of 10)	3	9898998	9907043	8046	2	176401	NM_001268117	1182	WBGene00009594	cyld-1	CYLinDromatosis (human disease gene) homolog
chrIII	10123681	10123892	212	*	0	.	246.907	-1	3.5824	141	Promoter	3	10124183	10132223	8041	1	176427	NM_001027814	-291	WBGene00014232	ttll-4	Tubulin polyglutamylase ttll-4
chrIII	10810919	10811402	484	*	0	.	171.487	-1	3.5824	242	Downstream (<1kb)	3	10808346	10810750	2405	1	176511	NM_001027507	2573	WBGene00002219	klp-7	Kinesin-like protein
chrIII	10881948	10882431	484	*	0	.	120.359	-1	3.20076	242	Promoter	3	10882370	10893575	11206	1	176517	NM_066996	0	WBGene00008081	athp-1	AT Hook plus PHD finger transcription factor
chrIII	12665438	12665921	484	*	0	.	196.111	-1	3.5824	242	Distal Intergenic	3	12652562	12662204	9643	2	176684	NM_067245	-3234	WBGene00013737	tpst-1	Protein-tyrosine sulfotransferase A
chrIII	13068346	13068656	311	*	0	.	470.358	-1	3.5824	149	Distal Intergenic	3	13071009	13073554	2546	1	176728	NM_001276802	-2353	WBGene00012717	Y39E4B.6	hypothetical protein
chrIII	13068574	13068695	122	*	0	.	204.303	-1	3.5824	120	Distal Intergenic	3	13071009	13073554	2546	1	176728	NM_001276802	-2314	WBGene00012717	Y39E4B.6	hypothetical protein
chrIII	13070475	13070970	496	*	0	.	114.318	-1	3.2341	446	Promoter	3	13071009	13073554	2546	1	176728	NM_001276802	-39	WBGene00012717	Y39E4B.6	hypothetical protein
chrIII	13464893	13465376	484	*	0	.	148.372	-1	3.5824	242	Exon (NM_067382/176774, exon 5 of 6)	3	13464818	13466295	1478	2	176774	NM_067382	919	WBGene00000407	cdk-5	Cyclin-dependent-like kinase 5
chrIII	13564814	13565297	484	*	0	.	187.79	-1	3.5824	242	Promoter	3	13563483	13564919	1437	2	176788	NM_171235	0	WBGene00011474	aldo-1	Fructose-bisphosphate aldolase 1
chrIV	192005	192488	484	*	0	.	185.456	-1	3.5824	242	Promoter	4	192482	193907	1426	1	259547	NM_001307378	0	WBGene00021402	Y38C1AA.12	hypothetical protein
chrIV	1213086	1213569	484	*	0	.	140.125	-1	3.5824	242	Distal Intergenic	4	1216627	1218270	1644	1	176940	NM_067654	-3058	WBGene00021123	W09G12.9	hypothetical protein
chrIV	1595878	1596150	273	*	0	.	330.047	-1	3.5824	122	Promoter	4	1590894	1595805	4912	2	176966	NM_067703	-73	WBGene00003794	npp-8	Nuclear Pore complex Protein
chrIV	1738182	1738665	484	*	0	.	141.118	-1	3.5824	242	Downstream (2-3kb)	4	1731159	1737865	6707	2	176981	NM_067727	-317	WBGene00021507	Y41D4A.5	Tyrosine-protein phosphatase
chrIV	1857932	1858167	236	*	0	.	440.345	-1	3.5824	117	Intron (NM_001307521/176991, intron 1 of 9)	4	1858557	1879939	21383	1	176991	NM_171279	-390	WBGene00001173	egl-4	cGMP-dependent protein kinase;cGMP-dependent protein kinase egl-4;hypothetical protein
chrIV	1858124	1858309	186	*	0	.	150.403	-1	3.5824	144	Promoter	4	1858557	1879939	21383	1	176991	NM_171279	-248	WBGene00001173	egl-4	cGMP-dependent protein kinase;cGMP-dependent protein kinase egl-4;hypothetical protein
chrIV	3050377	3050860	484	*	0	.	518.423	-1	3.5824	242	Distal Intergenic	4	3033193	3049971	16779	2	177084	NM_067883	-406	WBGene00022069	eel-1	Enhancer of EfL-1 mutant phenotype
chrIV	3050775	3051050	276	*	0	.	436.932	-1	3.5824	57	Distal Intergenic	4	3033193	3049971	16779	2	177084	NM_067883	-804	WBGene00022069	eel-1	Enhancer of EfL-1 mutant phenotype
chrIV	4407040	4407523	484	*	0	.	205.339	-1	3.5824	242	Distal Intergenic	4	4408835	4414587	5753	1	177206	NM_171318	-1312	WBGene00021281	ell-1	ELL transcription elongation factor homolog
chrIV	4445818	4445987	170	*	0	.	234.722	-1	3.5824	96	Promoter	4	4443408	4445740	2333	2	177211	NM_068167	-78	WBGene00019953	wapl-1	Wings apart-like protein homolog 1
chrIV	4469895	4470378	484	*	0	.	118.538	-1	3.20978	242	Promoter	4	4468918	4469841	924	2	177215	NM_068175	-54	WBGene00019719	M01H9.3	hypothetical protein
chrIV	4477263	4477449	187	*	0	.	274.646	-1	3.5824	89	Promoter	4	4468918	4477058	8141	2	177215	NM_068174	-205	WBGene00019719	M01H9.3	hypothetical protein
chrIV	4660602	4660773	172	*	0	.	139.345	-1	3.5824	153	Promoter	4	4661009	4664941	3933	1	177232	NM_001307452	-236	WBGene00017920	jmjd-1.2	Lysine-specific demethylase 7 homolog
chrIV	5085514	5085997	484	*	0	.	116.91	-1	3.2195	242	Exon (NM_068318/177280, exon 5 of 6)	4	5084394	5086431	2038	1	177280	NM_001306812	1120	WBGene00015330	C02B10.5	hypothetical protein
chrIV	6053380	6053863	484	*	0	.	122.636	-1	3.18667	242	Promoter	4	6053799	6073965	20167	1	177370	NM_001268349	0	WBGene00019205	kcc-2	K+/Cl-Cotransporter
chrIV	6878848	6879331	484	*	0	.	202.958	-1	3.5824	242	Promoter	4	6876860	6878877	2018	2	177451	NM_001306845	0	WBGene00006608	tre-2	Trehalase
chrIV	7023832	7024315	484	*	0	.	118.102	-1	3.21245	242	Promoter	4	7024243	7028001	3759	1	177469	NM_068686	0	WBGene00015551	C06G3.5	hypothetical protein
chrIV	7723465	7723948	484	*	0	.	162.507	-1	3.5824	242	Promoter	4	7720633	7723197	2565	2	177553	NM_068861	-268	WBGene00016846	C50F7.6	hypothetical protein
chrIV	7948315	7948798	484	*	0	.	120.497	-1	3.20021	242	Promoter	4	7948677	7953425	4749	1	177589	NM_068927	0	WBGene00017642	F20D12.2	hypothetical protein
chrIV	8066494	8066977	484	*	0	.	222.725	-1	3.5824	242	Promoter	4	8067102	8082763	15662	1	177602	NM_001038305	-125	WBGene00004732	sax-7	Sensory AXon guidance
chrIV	8183263	8183746	484	*	0	.	141.813	-1	3.5824	242	Intron (NM_068971/177615, intron 3 of 9)	4	8184710	8188435	3726	1	177615	NM_001026141	-964	WBGene00003961	pct-1	Cyclin-dependent kinase 17
chrIV	8229429	8229912	484	*	0	.	187.726	-1	3.5824	242	Promoter	4	8226743	8229354	2612	2	177618	NM_171398	-75	WBGene00003656	nhr-66	Nuclear Hormone Receptor family
chrIV	8375293	8375776	484	*	0	.	189.581	-1	3.5824	242	Exon (NM_069018/177632, exon 16 of 16)	4	8375733	8376432	700	2	177635	NM_001307123	656	WBGene00017074	D2096.7	hypothetical protein
chrIV	8431971	8432454	484	*	0	.	176.163	-1	3.5824	242	Distal Intergenic	4	8429420	8431490	2071	2	177643	NM_069034	-481	WBGene00020827	T26A8.4	hypothetical protein
chrIV	8432845	8433067	223	*	0	.	294.689	-1	3.5824	108	Promoter	4	8433142	8437571	4430	1	177644	NM_069035	-75	WBGene00020824	T26A8.1	hypothetical protein
chrIV	8794992	8795475	484	*	0	.	143.443	-1	3.5824	242	Downstream (1-2kb)	4	8791345	8792890	1546	2	177691	NM_001027871	-2102	WBGene00007898	C33D9.3	hypothetical protein
chrIV	8866180	8866347	168	*	0	.	228.726	-1	3.5824	134	Downstream (1-2kb)	4	8862768	8865046	2279	2	177702	NM_069135	-1134	WBGene00007492	C09G9.1	hypothetical protein
chrIV	9121533	9122016	484	*	0	.	137.153	-1	3.10868	242	Promoter	4	9121481	9129932	8452	1	177736	NM_171411	52	WBGene00006438	nrfl-1	NHERF (mammalian Na/H Exchange Regulatory Factor) Like
chrIV	10342015	10342498	484	*	0	.	215.056	-1	3.5824	242	Intron (NM_001268551/177921, intron 2 of 18)	4	10338698	10340168	1471	2	177921	NM_001028123	-1847	WBGene00006779	unc-43	Calcium/calmodulin-dependent protein kinase type II
chrIV	10342215	10342698	484	*	0	.	124.774	-1	3.17677	242	Intron (NM_001268551/177921, intron 2 of 18)	4	10338698	10340168	1471	2	177921	NM_001028123	-2047	WBGene00006779	unc-43	Calcium/calmodulin-dependent protein kinase type II
chrIV	10481646	10482129	484	*	0	.	129.997	-1	3.15035	242	Promoter	4	10478642	10481767	3126	2	177940	NM_069534	0	WBGene00001189	egl-21	Carboxypeptidase E
chrIV	11119053	11119536	484	*	0	.	194.764	-1	3.5824	242	Promoter	4	11119451	11122938	3488	1	178014	NM_001268607	0	WBGene00011480	enpl-1	Endoplasmin homolog
chrIV	11486703	11487186	484	*	0	.	114.901	-1	3.23121	242	Intron (NM_069768/178072, intron 1 of 5)	4	11483229	11486110	2882	2	178072	NM_001268630	-593	WBGene00004892	sms-1	Phosphatidylcholine:ceramide cholinephosphotransferase 1
chrIV	11571427	11571910	484	*	0	.	126.488	-1	3.16918	242	Promoter	4	11571970	11578358	6389	1	178079	NM_001307035	-60	WBGene00006406	srgp-1	Slit-Robo GAP homolog
chrIV	11765434	11765917	484	*	0	.	167.557	-1	3.5824	242	Downstream (2-3kb)	4	11768874	11769628	755	2	188437	NM_001083238	3711	WBGene00011725	lips-5	LIPaSe related
chrIV	12404071	12404554	484	*	0	.	167.805	-1	3.5824	242	Promoter	4	12404435	12408440	4006	1	178191	NM_069967	0	WBGene00001580	gex-3	Membrane-associated protein gex-3
chrIV	12615324	12615807	484	*	0	.	127.813	-1	3.16286	242	Distal Intergenic	4	12606104	12614719	8616	2	178217	NM_070016	-605	WBGene00013223	efa-6	Exchange factor for Arf-6
chrIV	12621621	12622104	484	*	0	.	116.378	-1	3.22298	242	Downstream (<1kb)	4	12606104	12614719	8616	2	178217	NM_070016	-6902	WBGene00013223	efa-6	Exchange factor for Arf-6
chrIV	13272490	13272973	484	*	0	.	124.365	-1	3.17926	242	Promoter	4	13261869	13272511	10643	2	178284	NM_001028094	0	WBGene00006763	unc-26	Synaptojanin
chrIV	16863417	16863900	484	*	0	.	132.964	-1	3.13386	242	Promoter	4	16855123	16863438	8316	2	178469	NM_001268980	0	WBGene00020284	mel-46	hypothetical protein
chrIV	16995362	16995845	484	*	0	.	154.382	-1	3.5824	242	Promoter	4	16995822	17014586	18765	1	3565076	NM_001047548	0	WBGene00004403	rom-4	Rhomboid-like protein
chrIV	17268632	17269115	484	*	0	.	163.65	-1	3.5824	242	Promoter	4	17269343	17272059	2717	1	178504	NM_070663	-228	WBGene00000224	atgp-1	Amino acid Transporter GlycoProtein subunit
chrV	727888	728371	484	*	0	.	126.7	-1	3.16801	242	Promoter	5	724457	727957	3501	2	178583	NM_070905	0	WBGene00001564	icl-1	Malate synthase
chrV	2809451	2809934	484	*	0	.	164.044	-1	3.5824	242	Downstream (2-3kb)	5	2810490	2811953	1464	1	178742	NM_071360	-556	WBGene00018823	F54E2.1	hypothetical protein
chrV	4730019	4730502	484	*	0	.	168.599	-1	3.5824	242	Promoter	5	4726796	4730120	3325	2	178864	NM_071870	0	WBGene00006570	tig-2	TransformIng Growth factor beta family
chrV	4731361	4731844	484	*	0	.	187.636	-1	3.5824	242	Promoter	5	4731911	4734430	2520	1	178865	NM_001322552	-67	WBGene00018208	F39G3.3	hypothetical protein
chrV	4860394	4860877	484	*	0	.	136.856	-1	3.11137	242	Promoter	5	4859131	4860467	1337	2	178878	NM_001047631	0	WBGene00016511	C37H5.13	hypothetical protein
chrV	5065109	5065231	123	*	0	.	237.684	-1	3.5824	110	Downstream (1-2kb)	5	5056780	5064777	7998	2	178895	NM_171928	-332	WBGene00003374	mlk-1	Mitogen-activated protein kinase kinase kinase mlk-1
chrV	6030691	6030851	161	*	0	.	255.876	-1	3.5824	42	Intron (NR_136375/178990, intron 3 of 10)	5	6026513	6030375	3863	2	178990	NM_001047644	-316	WBGene00000980	dhs-17	DeHydrogenases, Short chain
chrV	7215835	7216318	484	*	0	.	117.389	-1	3.21617	242	Downstream (1-2kb)	5	7205952	7214887	8936	2	179109	NM_072427	-948	WBGene00015743	soap-1	Sorting Of Apical Proteins
chrV	10857240	10857723	484	*	0	.	164.191	-1	3.5824	242	Intron (NM_001307768/179505, intron 1 of 7)	5	10852883	10855241	2359	2	179505	NM_001129481	-1999	WBGene00010012	saeg-1	Suppressor of activated egl-4 protein 1
chrV	10858409	10858751	343	*	0	.	459.776	-1	3.5824	168	Intron (NM_001307768/179505, intron 1 of 7)	5	10852883	10859781	6899	2	179505	NM_001307768	1030	WBGene00010012	saeg-1	Suppressor of activated egl-4 protein 1
chrV	10871460	10871745	286	*	0	.	269.266	-1	3.5824	150	Distal Intergenic	5	10852883	10865699	12817	2	179505	NM_073368	-5761	WBGene00010012	saeg-1	Suppressor of activated egl-4 protein 1
chrV	11140289	11140772	484	*	0	.	192.976	-1	3.5824	242	Exon (NM_001269374/182348, exon 6 of 6)	5	11141498	11143063	1566	1	179544	NM_073432	-726	WBGene00007388	folt-1	Folate transporter 1
chrV	11535460	11535943	484	*	0	.	137.235	-1	3.10778	242	Intron (NM_073525/179584, intron 2 of 8)	5	11532773	11540184	7412	1	179584	NM_073526	2687	WBGene00009532	ccch-1	CCCH-type zinc finger putative transcription factor
chrV	11933218	11933701	484	*	0	.	154.257	-1	3.5824	242	Promoter	5	11927832	11933227	5396	2	179632	NM_073594	0	WBGene00010284	aman-2	Alpha-mannosidase
chrV	12269292	12269775	484	*	0	.	190.18	-1	3.5824	242	Promoter	5	12265883	12269310	3428	2	179682	NM_001028810	0	WBGene00006677	twk-24	TWiK family of potassium channels
chrV	13041623	13042106	484	*	0	.	162.293	-1	3.5824	242	Promoter	5	13038756	13041721	2966	2	179789	NM_073858	0	WBGene00012337	W07G4.3	hypothetical protein
chrV	13468143	13468626	484	*	0	.	147.178	-1	3.5824	242	Promoter	5	13467181	13468268	1088	2	179829	NM_073940	0	WBGene00009138	F25H9.6	hypothetical protein
chrV	13789562	13789718	157	*	0	.	294.064	-1	3.5824	78	Promoter	5	13789887	13795919	6033	1	179874	NM_001047656	-169	WBGene00009975	F53C11.5	hypothetical protein
chrV	14002370	14002853	484	*	0	.	140.712	-1	3.5824	242	Promoter	5	13987690	14002397	14708	2	179894	NM_001047667	0	WBGene00010259	ric-7	hypothetical protein
chrV	14193318	14193801	484	*	0	.	178.831	-1	3.5824	242	Distal Intergenic	5	14194483	14197421	2939	1	179922	NM_001029131	-682	WBGene00013878	atfs-1	Stress activated transcription factor atfs-1
chrV	14800242	14800725	484	*	0	.	175.516	-1	3.5824	242	Promoter	5	14784641	14800818	16178	2	3565509	NM_001129409	93	WBGene00008183	rin-1	RIN (Ras/Rab INteractor) homolog
chrV	15002292	15002775	484	*	0	.	256.873	-1	3.5824	242	Promoter	5	15002713	15004809	2097	1	180000	NM_001269709	0	WBGene00011323	mut-15	MUTator
chrV	16553041	16553163	123	*	0	.	184.064	-1	3.5824	41	Promoter	5	16553335	16562792	9458	1	180110	NM_001269786	-172	WBGene00012524	Y32B12B.4	hypothetical protein
chrV	18967739	18967953	215	*	0	.	200.631	-1	3.5824	101	Promoter	5	18961101	18967787	6687	2	180238	NM_171562	0	WBGene00012701	Y39B6A.43	hypothetical protein
chrV	19522801	19522937	137	*	0	.	217.154	-1	3.5824	55	Promoter	5	19520168	19522767	2600	2	180278	NM_075396	-34	WBGene00012813	Y43F8B.2	hypothetical protein
chrV	19529240	19529361	122	*	0	.	197.144	-1	3.5824	121	Intron (NM_001269946/180278, intron 3 of 5)	5	19520168	19531987	11820	2	180278	NM_001269946	2626	WBGene00012813	Y43F8B.2	hypothetical protein
chrV	19622248	19622731	484	*	0	.	174.623	-1	3.5824	242	Promoter	5	19615069	19622346	7278	2	180282	NM_075402	0	WBGene00012825	Y43F8C.3	hypothetical protein
chrV	20486531	20487014	484	*	0	.	121.209	-1	3.19581	242	Downstream (<1kb)	5	20480897	20485372	4476	2	181886	NM_075540	-1159	WBGene00007126	dhcr-7	DeHydroCholesterol Reductase
chrX	410047	410472	426	*	0	.	457.167	-1	3.5824	259	Intron (NM_001351873/180396, intron 25 of 31)	6	406490	408077	1588	2	180396	NM_001351874	-1970	NA	ZK1193.2	hypothetical protein
chrX	410264	410747	484	*	0	.	172.842	-1	3.5824	242	Exon (NM_001351873/180396, exon 25 of 32)	6	406490	408077	1588	2	180396	NM_001351874	-2187	NA	ZK1193.2	hypothetical protein
chrX	1504741	1505224	484	*	0	.	121.382	-1	3.19507	242	Promoter	6	1504131	1504841	711	2	180490	NR_001528	0	NA	tts-1	ncRNA
chrX	2089420	2089903	484	*	0	.	128.286	-1	3.16067	242	Promoter	6	2089800	2092729	2930	1	180522	NM_001029525	0	WBGene00003087	lsy-2	hypothetical protein
chrX	3089986	3090469	484	*	0	.	170.388	-1	3.5824	242	Promoter	6	3090437	3092211	1775	1	180596	NM_171648	0	WBGene00018701	pccb-1	Propionyl Coenzyme A Carboxylase Beta subunit
chrX	3099766	3100249	484	*	0	.	211.179	-1	3.5824	242	Promoter	6	3095671	3099837	4167	2	180598	NM_076129	0	WBGene00018703	sec-3	Exocyst complex component 1
chrX	3245787	3246270	484	*	0	.	124.291	-1	3.17984	242	Promoter	6	3244266	3245767	1502	2	180614	NM_076152	-20	WBGene00018238	F40F4.7	hypothetical protein
chrX	4145057	4145230	174	*	0	.	212.739	-1	3.5824	100	Promoter	6	4145501	4147222	1722	1	180689	NM_076303	-271	WBGene00022745	ZK470.2	hypothetical protein
chrX	4145116	4145599	484	*	0	.	150.251	-1	3.5824	242	Promoter	6	4145501	4147222	1722	1	180689	NM_076303	0	WBGene00022745	ZK470.2	hypothetical protein
chrX	4606335	4606646	312	*	0	.	299.217	-1	3.5824	157	Distal Intergenic	6	4596199	4605896	9698	2	259704	NM_001029733	-439	WBGene00020496	spat-3	Suppressor of PAr-Two defect
chrX	4606451	4606934	484	*	0	.	235.024	-1	3.5824	242	Distal Intergenic	6	4596199	4605896	9698	2	259704	NM_001029733	-555	WBGene00020496	spat-3	Suppressor of PAr-Two defect
chrX	5942205	5942688	484	*	0	.	252.739	-1	3.5824	242	Promoter	6	5937960	5942039	4080	2	180859	NM_076592	-166	WBGene00016716	acs-17	fatty Acid CoA Synthetase family
chrX	6742099	6742467	369	*	0	.	319.467	-1	3.5824	167	Promoter	6	6742486	6743669	1184	1	180942	NM_076735	-19	WBGene00003163	mdl-1	MAD-Like
chrX	6742776	6743259	484	*	0	.	135.527	-1	3.11981	242	Promoter	6	6742486	6743669	1184	1	180942	NM_076735	290	WBGene00003163	mdl-1	MAD-Like
chrX	6825813	6826296	484	*	0	.	172.471	-1	3.5824	242	Promoter	6	6824149	6825816	1668	2	180952	NM_076747	0	WBGene00018257	F41B4.1	hypothetical protein
chrX	7254477	7254960	484	*	0	.	115.555	-1	3.22677	242	Promoter	6	7245420	7254563	9144	2	180988	NM_076818	0	WBGene00018520	F46H5.4	hypothetical protein
chrX	8019773	8019934	162	*	0	.	278.573	-1	3.5824	97	Intron (NM_001277030/181059, intron 2 of 14)	6	8019228	8025420	6193	1	181059	NM_076949	545	WBGene00016407	C34D10.2	hypothetical protein
chrX	8252201	8252684	484	*	0	.	121.425	-1	3.19451	242	Promoter	6	8248437	8252254	3818	2	181080	NM_076992	0	WBGene00019781	M60.6	hypothetical protein
chrX	9543241	9543724	484	*	0	.	127.814	-1	3.16266	242	Distal Intergenic	6	9539946	9542249	2304	1	181174	NM_077203	3295	WBGene00003828	nuc-1	Deoxyribonuclease-2
chrX	9544332	9544815	484	*	0	.	148.505	-1	3.5824	242	Distal Intergenic	6	9539946	9542249	2304	1	181174	NM_077203	4386	WBGene00003828	nuc-1	Deoxyribonuclease-2
chrX	10332205	10332688	484	*	0	.	118.146	-1	3.21228	242	Downstream (1-2kb)	6	10330718	10331873	1156	2	187678	NM_077332	-332	WBGene00011105	R07E3.4	hypothetical protein
chrX	10377598	10378081	484	*	0	.	304.39	-1	3.5824	242	Promoter	6	10373602	10377610	4009	2	185870	NM_077338	0	WBGene00004375	rme-4	Receptor Mediated Endocytosis
chrX	11206943	11207426	484	*	0	.	115.692	-1	3.22626	242	Promoter	6	11204456	11207088	2633	2	181309	NM_077470	0	WBGene00002029	hst-2	Heparan sulfate 2-O-sulfotransferase hst-2
chrX	11262276	11262759	484	*	0	.	267.516	-1	3.5824	242	Promoter	6	11262911	11265889	2979	1	181315	NM_077478	-152	WBGene00007267	C03A3.2	Transmembrane protein 104 homolog
chrX	12975577	12976060	484	*	0	.	182.904	-1	3.5824	242	Promoter	6	12969263	12975643	6381	2	181428	NM_077754	0	WBGene00004089	ppk-3	PIP Kinase
chrX	13320505	13320988	484	*	0	.	134.816	-1	3.12331	242	Distal Intergenic	6	13323159	13327448	4290	1	181454	NM_077817	-2171	WBGene00009797	F46G10.2	hypothetical protein
chrX	13527273	13527756	484	*	0	.	216.617	-1	3.5824	242	Distal Intergenic	6	13529102	13531522	2421	1	181474	NM_077860	-1346	WBGene00008940	F18H3.4	hypothetical protein
chrX	13598039	13598522	484	*	0	.	133.661	-1	3.12915	242	Promoter	6	13598471	13599391	921	1	181481	NM_077876	0	WBGene00000262	bra-1	BMP Receptor Associated protein family
chrX	14146747	14147230	484	*	0	.	239.103	-1	3.5824	242	Distal Intergenic	6	14147707	14151148	3442	1	181524	NM_001029441	-477	WBGene00000103	akt-2	Serine/threonine-protein kinase akt-2
chrX	14480175	14480658	484	*	0	.	195.525	-1	3.5824	242	Promoter	6	14480574	14484472	3899	1	181544	NM_078008	0	WBGene00001583	gfi-3	Protein gfi-3
chrX	14975510	14975993	484	*	0	.	179.001	-1	3.5824	242	Promoter	6	14976118	14978554	2437	1	181593	NM_078085	-125	WBGene00008975	F20D1.3	hypothetical protein
chrX	15181566	15181728	163	*	0	.	263.837	-1	3.5824	78	Promoter	6	15178667	15181455	2789	2	181612	NM_078122	-111	WBGene00011680	T10B10.3	hypothetical protein
chrX	15707477	15707773	297	*	0	.	409.853	-1	3.5824	151	Intron (NR_053033/13192567, intron 1 of 1)	6	15710077	15716232	6156	1	181661	NM_001029827	-2304	WBGene00003638	nhr-48	Nuclear hormone receptor family member nhr-48
chrX	15849335	15849818	484	*	0	.	205.703	-1	3.5824	242	Promoter	6	15849900	15851567	1668	1	181671	NM_078205	-82	WBGene00010339	acl-1	Putative 1-acyl-sn-glycerol-3-phosphate acyltransferase acl-1
chrX	16128804	16129287	484	*	0	.	160.609	-1	3.5824	242	Promoter	6	16124399	16128813	4415	2	181689	NM_078233	0	WBGene00014213	ZK1073.1	hypothetical protein
chrX	16130967	16131450	484	*	0	.	203.373	-1	3.5824	242	Distal Intergenic	6	16124399	16128813	4415	2	181689	NM_078233	-2154	WBGene00014213	ZK1073.1	hypothetical protein
chrX	16799091	16799574	484	*	0	.	156.065	-1	3.5824	242	Promoter	6	16799750	16802850	3101	1	181727	NM_001029697	-176	WBGene00020142	aak-2	5'-AMP-activated protein kinase catalytic subunit alpha-2
chrX	16872388	16872871	484	*	0	.	175.94	-1	3.5824	242	Promoter	6	16872926	16878042	5117	1	181737	NM_078326	-55	WBGene00020630	T20F7.1	hypothetical protein
chrX	17628303	17628786	484	*	0	.	152.302	-1	3.5824	242	Promoter	6	17623816	17628246	4431	2	181788	NM_171822	-57	WBGene00019211	H18N23.2	Protein phosphatase 1 regulatory subunit
chrX	17633105	17633588	484	*	0	.	177.201	-1	3.5824	242	Intron (NM_001029567/181788, intron 1 of 6)	6	17623816	17628246	4431	2	181788	NM_171822	-4859	WBGene00019211	H18N23.2	Protein phosphatase 1 regulatory subunit
chrX	17636249	17636732	484	*	0	.	152.774	-1	3.5824	242	Intron (NM_001029567/181788, intron 1 of 6)	6	17623816	17640743	16928	2	181788	NM_001029567	4011	WBGene00019211	H18N23.2	Protein phosphatase 1 regulatory subunit
chrX	17640740	17641223	484	*	0	.	224.525	-1	3.5824	242	Promoter	6	17623816	17640743	16928	2	181788	NM_001029567	0	WBGene00019211	H18N23.2	Protein phosphatase 1 regulatory subunit

## Sheet: N3M_up_N3MvF3M_intersect_CEH-18
seqnames	start	end	width	strand	score	name	thickStart	thickEnd	itemRgb	blockCount	annotation	geneChr	geneStart	geneEnd	geneLength	geneStrand	geneId	transcriptId	distanceToTSS	ENSEMBL	SYMBOL	GENENAME
chrI	535352	535501	150	*	0	.	213.365	-1	3.5824	112	Downstream (1-2kb)	1	535808	536493	686	1	171646	NM_001306344	-307	WBGene00022042	icd-2	Nascent polypeptide-associated complex subunit alpha
chrI	1435529	1435755	227	*	0	.	348.608	-1	3.5824	126	Distal Intergenic	1	1436292	1441214	4923	1	171710	NM_058453	-537	WBGene00022373	mrpl-15	Mitochondrial Ribosomal Protein, Large
chrI	2299564	2300047	484	*	0	.	169.419	-1	3.5824	242	Promoter	1	2300113	2302633	2521	1	171787	NM_058554	-66	WBGene00021468	epg-2	Ectopic P granules protein 2
chrI	5105962	5106445	484	*	0	.	142.088	-1	3.5824	242	Promoter	1	5105247	5106045	799	2	172139	NM_059119	0	WBGene00003924	pas-3	Proteasome subunit alpha type-4
chrI	6166613	6167096	484	*	0	.	199.784	-1	3.5824	242	Promoter	1	6164837	6166531	1695	2	172301	NM_059376	-82	WBGene00020382	T09B4.8	hypothetical protein
chrI	6220762	6221245	484	*	0	.	143.772	-1	3.5824	242	Promoter	1	6220149	6220750	602	2	172313	NM_059394	-12	WBGene00004486	rps-17	40S ribosomal protein S17
chrI	8409846	8409978	133	*	0	.	249.346	-1	3.5824	38	Promoter	1	8408161	8409731	1571	2	172626	NM_059880	-115	WBGene00003014	lin-28	Protein lin-28
chrI	8411167	8411650	484	*	0	.	129.505	-1	3.15361	242	Distal Intergenic	1	8408161	8410803	2643	2	172626	NM_001025914	-364	WBGene00003014	lin-28	Protein lin-28
chrI	8426831	8426977	147	*	0	.	259.455	-1	3.5824	90	Downstream (<1kb)	1	8425166	8426075	910	2	172629	NM_001128971	-756	WBGene00008530	F02E9.5	hypothetical protein
chrI	8816481	8816633	153	*	0	.	188.443	-1	3.5824	73	Promoter	1	8815600	8816185	586	2	172693	NM_059983	-296	WBGene00004484	rps-15	40S ribosomal protein S15
chrI	9688681	9689164	484	*	0	.	204.778	-1	3.5824	242	Promoter	1	9689202	9690046	845	1	172818	NM_060175	-38	WBGene00004426	rpl-14	Ribosomal Protein, Large subunit
chrI	10642406	10642571	166	*	0	.	266.138	-1	3.5824	64	Promoter	1	10640808	10642275	1468	2	172959	NM_060384	-131	WBGene00001228	eif-3.E	Eukaryotic translation initiation factor 3 subunit E
chrI	11203233	11203716	484	*	0	.	128.426	-1	3.15987	242	Distal Intergenic	1	11206986	11211301	4316	1	173014	NM_060476	-3270	WBGene00012317	ztf-6	Zinc finger putative Transcription Factor family
chrI	11204458	11204941	484	*	0	.	119.077	-1	3.20728	242	Distal Intergenic	1	11206986	11211301	4316	1	173014	NM_060476	-2045	WBGene00012317	ztf-6	Zinc finger putative Transcription Factor family
chrI	13463788	13464112	325	*	0	.	387.456	-1	3.5824	193	Promoter	1	13463955	13464207	253	1	13182787	NR_050680	0	NA	rpr-1	ncRNA
chrI	13463938	13464421	484	*	0	.	155.583	-1	3.5824	242	Promoter	1	13463955	13464207	253	1	13182787	NR_050680	0	NA	rpr-1	ncRNA
chrI	13688579	13689062	484	*	0	.	166.343	-1	3.5824	242	Intron (NR_052112/13188615, intron 1 of 2)	1	13685371	13687571	2201	2	3565636	NM_001026494	-1008	WBGene00012235	W04A4.6	hypothetical protein
chrI	14384751	14385234	484	*	0	.	122.045	-1	3.18968	242	Promoter	1	14381455	14384737	3283	2	173301	NM_170938	-14	WBGene00006824	unc-95	hypothetical protein
chrI	15033869	15034352	484	*	0	.	166.463	-1	3.5824	242	Promoter	1	15034532	15035276	745	1	173372	NM_061221	-180	WBGene00009367	F33H2.3	Acidic leucine-rich nuclear phosphoprotein 32-related protein 1
chrII	526317	526800	484	*	0	.	145.524	-1	3.5824	242	Promoter	2	526664	530220	3557	1	173443	NM_061351	0	WBGene00020836	lgc-34	Ligand-Gated ion Channel
chrII	4376693	4377038	346	*	0	.	335.981	-1	3.5824	160	Distal Intergenic	2	4372946	4375716	2771	2	173773	NM_062371	-977	WBGene00003825	ntl-2	NOT-Like (yeast CCR4/NOT complex component)
chrII	4518252	4518735	484	*	0	.	212.321	-1	3.5824	242	Distal Intergenic	2	4519069	4522400	3332	1	173788	NM_001026722	-334	WBGene00001948	hlh-1	Myoblast determination protein 1 homolog
chrII	4519977	4520460	484	*	0	.	158.432	-1	3.5824	242	Intron (NM_001026722/173788, intron 1 of 5)	2	4519069	4522437	3369	1	173788	NM_062397	908	WBGene00001948	hlh-1	Myoblast determination protein 1 homolog
chrII	4520196	4520679	484	*	0	.	138.792	-1	3.5824	242	Intron (NM_001026722/173788, intron 1 of 5)	2	4519069	4522437	3369	1	173788	NM_062397	1127	WBGene00001948	hlh-1	Myoblast determination protein 1 homolog
chrII	4672547	4673030	484	*	0	.	129.661	-1	3.15259	242	Promoter	2	4673086	4673601	516	1	173805	NM_062424	-56	WBGene00001976	hmg-11	HMG
chrII	6250716	6251199	484	*	0	.	168.674	-1	3.5824	242	Promoter	2	6251415	6252535	1121	1	174034	NM_062849	-216	WBGene00004015	phb-2	Mitochondrial prohibitin complex protein 2
chrII	6383112	6383595	484	*	0	.	131.49	-1	3.13977	242	Promoter	2	6383653	6384457	805	1	174059	NM_062885	-58	WBGene00019061	F58F12.1	ATP synthase subunit delta, mitochondrial
chrII	8561275	8561629	355	*	0	.	657.863	-1	3.5824	164	Downstream (2-3kb)	2	8559808	8560955	1148	2	174367	NM_063406	-320	WBGene00002065	iff-2	Eukaryotic translation initiation factor 5A-2
chrII	8787481	8787689	209	*	0	.	321.499	-1	3.5824	93	Distal Intergenic	2	8790698	8790912	215	1	174406	NM_063469	-3009	WBGene00008563	F07H5.13	hypothetical protein
chrII	9264833	9265316	484	*	0	.	145.054	-1	3.5824	242	Distal Intergenic	2	9267539	9268296	758	1	174468	NM_063573	-2223	WBGene00007224	C01G6.2	hypothetical protein
chrII	9619274	9619757	484	*	0	.	201.167	-1	3.5824	242	Promoter	2	9618640	9619170	531	2	174514	NM_063671	-104	WBGene00001038	dnj-20	DnaJ homolog dnj-20
chrII	10202240	10202723	484	*	0	.	144.301	-1	3.5824	242	Promoter	2	10201125	10202230	1106	2	174583	NR_000803	-10	NA	tts-2	ncRNA
chrII	10950064	10950547	484	*	0	.	141.652	-1	3.5824	242	Promoter	2	10950413	10950812	400	1	187537	NM_001267339	0	WBGene00001753	gst-5	Probable glutathione S-transferase 5
chrIII	5129224	5129707	484	*	0	.	194.6	-1	3.5824	242	Intron (NM_171117/175697, intron 31 of 32)	3	5131337	5136176	4840	2	175698	NM_065687	6469	WBGene00006543	tbx-2	T-box protein 2
chrIII	5136175	5136658	484	*	0	.	126.813	-1	3.16722	242	Promoter	3	5131337	5136176	4840	2	175698	NM_065687	0	WBGene00006543	tbx-2	T-box protein 2
chrIII	5563774	5564085	312	*	0	.	297.087	-1	3.5824	128	Intron (NM_065791/175767, intron 8 of 8)	3	5565132	5565574	443	1	175768	NM_171129	-1047	WBGene00003371	mlc-3	Myosin, essential light chain
chrIII	5564717	5565200	484	*	0	.	231.063	-1	3.5824	242	Promoter	3	5565132	5565574	443	1	175768	NM_171129	0	WBGene00003371	mlc-3	Myosin, essential light chain
chrIII	5564917	5565400	484	*	0	.	137.198	-1	3.108	242	Promoter	3	5565132	5565574	443	1	175768	NM_171129	0	WBGene00003371	mlc-3	Myosin, essential light chain
chrIII	6280084	6280567	484	*	0	.	251.317	-1	3.5824	242	Promoter	3	6280606	6281934	1329	1	175890	NM_001027428	-39	WBGene00001972	hmg-1.2	High mobility group protein 1.2
chrIII	7179608	7180091	484	*	0	.	139.265	-1	3.5824	242	Promoter	3	7179030	7179579	550	2	176006	NM_066171	-29	WBGene00004483	rps-14	40S ribosomal protein S14
chrIII	7554579	7555062	484	*	0	.	121.551	-1	3.1934	242	Distal Intergenic	3	7555661	7557730	2070	1	176069	NM_066254	-599	WBGene00000437	ceh-13	Homeobox protein ceh-13
chrIII	7854527	7854859	333	*	0	.	731.705	-1	3.5824	156	Promoter	3	7855150	7855574	425	1	176097	NM_066301	-291	WBGene00004449	rpl-35	60S ribosomal protein L35
chrIII	8043766	8044184	419	*	0	.	1223.43	-1	3.5824	199	Downstream (1-2kb)	3	8044487	8044780	294	1	187337	NM_066353	-303	WBGene00019680	K12H4.5	hypothetical protein
chrIII	8126958	8127441	484	*	0	.	133.39	-1	3.13087	242	Downstream (2-3kb)	3	8129591	8130219	629	2	176146	NM_066373	2778	WBGene00004433	rpl-21	60S ribosomal protein L21
chrIII	8130304	8130787	484	*	0	.	138.636	-1	3.5824	242	Promoter	3	8130865	8132271	1407	1	259519	NM_171208	-78	WBGene00015755	C14B9.10	hypothetical protein
chrIII	8425031	8425514	484	*	0	.	190.5	-1	3.5824	242	Distal Intergenic	3	8426340	8428265	1926	1	176190	NM_066461	-826	WBGene00000414	cec-1	Chromo domain-containing protein cec-1
chrIII	8768031	8768152	122	*	0	.	136.115	-1	3.11628	70	Promoter	3	8768314	8769153	840	1	187502	NM_066534	-162	WBGene00019800	mtss-1	Single-stranded DNA-binding protein, mitochondrial
chrIII	8815653	8816136	484	*	0	.	220.007	-1	3.5824	242	Distal Intergenic	3	8818902	8824978	6077	1	176240	NM_066547	-2766	WBGene00003929	pat-2	Integrin alpha pat-2
chrIII	9780567	9781050	484	*	0	.	177.484	-1	3.5824	242	Promoter	3	9781254	9781763	510	1	176383	NM_066764	-204	WBGene00006910	vha-1	V-type proton ATPase 16 kDa proteolipid subunit 1
chrIII	10599641	10600124	484	*	0	.	118.169	-1	3.21174	242	Promoter	3	10596957	10599651	2695	2	189705	NM_001027664	0	WBGene00012641	epg-6	Ectopic P Granules
chrIII	13002105	13002588	484	*	0	.	135.523	-1	3.12003	242	Distal Intergenic	3	13003966	13005280	1315	1	13191684	NM_001268256	-1378	WBGene00164985	ZK1010.10	hypothetical protein
chrIV	385436	385754	319	*	0	.	488.822	-1	3.5824	138	Promoter	4	385909	386549	641	1	176858	NM_067514	-155	WBGene00004493	rps-24	Ribosomal Protein, Small subunit
chrIV	654751	655089	339	*	0	.	623.809	-1	3.5824	166	Promoter	4	653538	654571	1034	2	176891	NM_067563	-180	WBGene00004427	rpl-15	60S ribosomal protein L15
chrIV	1659106	1659399	294	*	0	.	539.171	-1	3.5824	132	Downstream (<1kb)	4	1659704	1659956	253	1	176975	NM_067714	-305	WBGene00004497	rps-28	40S ribosomal protein S28
chrIV	6646035	6646279	245	*	0	.	309.959	-1	3.5824	116	Promoter	4	6646414	6646533	120	1	177433	NM_001026113	-135	WBGene00001858	hil-7	HIstone H1 Like
chrIV	7084689	7085172	484	*	0	.	130.392	-1	3.14809	242	Promoter	4	7083735	7084661	927	2	177481	NM_068702	-28	WBGene00004473	rps-4	40S ribosomal protein S4
chrIV	7486336	7486494	159	*	0	.	161.163	-1	3.5824	106	Promoter	4	7486545	7486916	372	1	186326	NM_068801	-51	WBGene00001936	his-62	Probable histone H2B 4
chrIV	7817804	7818287	484	*	0	.	165.895	-1	3.5824	242	Promoter	4	7818263	7820746	2484	1	177570	NM_068898	0	WBGene00004363	ric-3	Resistance to inhibitors of cholinesterase protein 3
chrIV	8757667	8758150	484	*	0	.	126.403	-1	3.16958	242	Promoter	4	8756735	8758204	1470	2	177685	NM_001136382	54	WBGene00002222	klp-11	Kinesin-like protein
chrIV	8762327	8762810	484	*	0	.	131.726	-1	3.13851	242	Distal Intergenic	4	8756735	8761996	5262	2	177685	NM_171407	-331	WBGene00002222	klp-11	Kinesin-like protein
chrIV	8782159	8782642	484	*	0	.	268.73	-1	3.5824	242	Downstream (<1kb)	4	8783377	8784854	1478	2	13197147	NM_001268402	2212	WBGene00194651	C33D9.13	hypothetical protein
chrIV	8850724	8851207	484	*	0	.	238.468	-1	3.5824	242	Distal Intergenic	4	8852514	8860373	7860	1	177701	NM_069132	-1307	WBGene00001132	alp-1	ALP/Enigma encoding
chrIV	8977998	8978481	484	*	0	.	132.989	-1	3.13343	242	Intron (NM_001129292/177716, intron 7 of 17)	4	8978926	8979795	870	2	177715	NM_069160	1314	WBGene00000693	col-119	COLlagen
chrIV	11602026	11602509	484	*	0	.	135.32	-1	3.12178	242	Promoter	4	11602652	11603217	566	1	178083	NM_069785	-143	WBGene00004480	rps-11	Ribosomal Protein, Small subunit
chrIV	12427611	12428094	484	*	0	.	143.554	-1	3.5824	242	Exon (NM_069971/178193, exon 2 of 2)	4	12427546	12428497	952	2	178193	NM_069971	403	WBGene00000704	col-130	COLlagen
chrIV	13703873	13704356	484	*	0	.	159.659	-1	3.5824	242	Promoter	4	13701774	13703955	2182	2	178338	NM_070246	0	WBGene00006580	tlp-1	T lineage defect, LePtoderan tail
chrIV	13881702	13882185	484	*	0	.	125.767	-1	3.1727	242	Promoter	4	13882242	13882584	343	1	178352	NM_001268834	-57	WBGene00004443	rpl-29	60S ribosomal protein L29
chrIV	14794062	14794545	484	*	0	.	142.919	-1	3.5824	242	Intron (NR_131651/178403, intron 1 of 2)	4	14793210	14793620	411	2	178403	NR_131652	-442	WBGene00000763	coq-3	Ubiquinone biosynthesis O-methyltransferase, mitochondrial
chrIV	14824895	14825378	484	*	0	.	181.911	-1	3.5824	242	Downstream (1-2kb)	4	14825699	14826364	666	1	178408	NM_070393	-321	WBGene00004487	rps-18	Ribosomal Protein, Small subunit
chrIV	16398982	16399465	484	*	0	.	117.167	-1	3.21792	242	Promoter	4	16398964	16399477	514	2	178456	NM_001307181	12	WBGene00013418	Y65A5A.1	hypothetical protein
chrV	773169	773652	484	*	0	.	145.944	-1	3.5824	242	Promoter	5	773591	774715	1125	1	178587	NM_070921	0	WBGene00019983	sti-1	Stress-induced-phosphoprotein 1
chrV	1471243	1471445	203	*	0	.	285.53	-1	3.5824	106	Intron (NR_052229/13189113, intron 1 of 1)	5	1469060	1470962	1903	1	178639	NM_001313187	2183	WBGene00018757	tag-304	hypothetical protein
chrV	2076024	2076507	484	*	0	.	129.668	-1	3.15219	242	Distal Intergenic	5	2069232	2072870	3639	2	178687	NM_071162	-3154	WBGene00021493	Y40B10A.9	hypothetical protein
chrV	4491267	4491750	484	*	0	.	144.9	-1	3.5824	242	Distal Intergenic	5	4497467	4510891	13425	1	178845	NM_001028998	-5717	WBGene00006796	unc-62	Homeobox protein unc-62
chrV	4502583	4503066	484	*	0	.	120.164	-1	3.20149	242	Exon (NM_001028998/178845, exon 5 of 10)	5	4501318	4510891	9574	1	178845	NM_001313278	1265	WBGene00006796	unc-62	Homeobox protein unc-62
chrV	4507832	4508187	356	*	0	.	270.207	-1	3.5824	212	Intron (NM_001028998/178845, intron 8 of 9)	5	4509913	4510891	979	1	178845	NM_001029001	-1726	WBGene00006796	unc-62	Homeobox protein unc-62
chrV	4508010	4508493	484	*	0	.	152.205	-1	3.5824	242	Intron (NM_001028998/178845, intron 8 of 9)	5	4509913	4510891	979	1	178845	NM_001029001	-1420	WBGene00006796	unc-62	Homeobox protein unc-62
chrV	7060479	7060636	158	*	0	.	229.005	-1	3.5824	55	Promoter	5	7059822	7060358	537	2	179092	NM_072391	-121	WBGene00021959	Y57E12AL.6	hypothetical protein
chrV	10897228	10897493	266	*	0	.	319.328	-1	3.5824	161	Promoter	5	10896880	10897135	256	2	179510	NM_073377	-93	WBGene00001303	emo-1	Protein transport protein Sec61 subunit gamma
chrV	11638710	11638874	165	*	0	.	237.947	-1	3.5824	50	Downstream (2-3kb)	5	11631872	11637206	5335	2	179596	NM_001276934	-1504	WBGene00012100	sipa-1	SIPA (vertebrate Signal-Induced Proliferation-Associated) homolog
chrV	11887921	11888404	484	*	0	.	234.032	-1	3.5824	242	Promoter	5	11888296	11889437	1142	1	179627	NM_073590	0	WBGene00010790	sodh-1	Alcohol dehydrogenase 1
chrV	12318145	12318628	484	*	0	.	120.469	-1	3.20058	242	Promoter	5	12318627	12319995	1369	1	179690	NM_073689	0	WBGene00011015	R04F11.2	hypothetical protein
chrV	12343510	12343993	484	*	0	.	158.476	-1	3.5824	242	Promoter	5	12342481	12343467	987	2	179691	NM_073691	-43	WBGene00009092	tomm-20	Mitochondrial import receptor subunit TOM20 homolog
chrV	14355697	14356180	484	*	0	.	146.846	-1	3.5824	242	Promoter	5	14356081	14356722	642	1	179936	NM_074160	0	WBGene00000877	cyn-1	Peptidyl-prolyl cis-trans isomerase 1
chrV	15189522	15190005	484	*	0	.	151.164	-1	3.5824	242	Promoter	5	15189952	15190833	882	1	180028	NM_074350	0	WBGene00000879	cyn-3	Peptidyl-prolyl cis-trans isomerase 3
chrV	15511584	15512067	484	*	0	.	154.271	-1	3.5824	242	Promoter	5	15512195	15512679	485	1	180044	NM_074459	-128	WBGene00004452	rpl-38	60S ribosomal protein L38
chrV	20771661	20772144	484	*	0	.	119.491	-1	3.20367	242	Downstream (<1kb)	5	20765009	20770132	5124	2	180358	NM_001270021	-1529	WBGene00001248	elp-1	Echinoderm microtubule-associated protein-like elp-1
chrV	20789060	20789543	484	*	0	.	136.747	-1	3.11182	242	Promoter	5	20789549	20790481	933	1	180360	NM_075610	-6	WBGene00012853	Y44A6D.2	hypothetical protein
chrX	1081882	1082365	484	*	0	.	217.829	-1	3.5824	242	Downstream (2-3kb)	6	1079546	1080625	1080	2	180460	NM_075804	-1257	WBGene00003991	pfn-3	Profilin-3
chrX	1120238	1120721	484	*	0	.	157.319	-1	3.5824	242	Downstream (1-2kb)	6	1117347	1119397	2051	2	180465	NM_075812	-841	WBGene00015474	C05D9.7	hypothetical protein
chrX	1456711	1457194	484	*	0	.	159.959	-1	3.5824	242	Distal Intergenic	6	1459120	1462687	3568	1	180484	NM_075876	-1926	WBGene00016996	D1005.2	UTP--glucose-1-phosphate uridylyltransferase
chrX	3601471	3601954	484	*	0	.	137.08	-1	3.10913	242	Promoter	6	3601840	3604147	2308	1	180651	NM_076218	0	WBGene00015954	C18B2.3	hypothetical protein
chrX	5077733	5078216	484	*	0	.	120.49	-1	3.20039	242	Promoter	6	5074810	5077858	3049	2	192083	NM_076463	0	WBGene00006861	cal-5	CALmodulin related genes
chrX	6092021	6092289	269	*	0	.	258.152	-1	3.5824	151	Promoter	6	6089391	6091763	2373	2	180880	NM_076618	-258	WBGene00002007	hsp-3	Heat shock 70 kDa protein C
chrX	6250146	6250629	484	*	0	.	231.614	-1	3.5824	242	Intron (NR_050360/13181398, intron 1 of 1)	6	6252274	6253785	1512	1	189229	NR_132542	-1645	NA	W05H9.3	ncRNA
chrX	6252006	6252489	484	*	0	.	153.847	-1	3.5824	242	Promoter	6	6252274	6253785	1512	1	189229	NR_132542	0	NA	W05H9.3	ncRNA
chrX	6254387	6254546	160	*	0	.	168.519	-1	3.5824	57	Intron (NR_050360/13181398, intron 1 of 1)	6	6252274	6253785	1512	1	189229	NR_132542	2113	NA	W05H9.3	ncRNA
chrX	8566045	8566528	484	*	0	.	115.979	-1	3.22436	242	Distal Intergenic	6	8571074	8575036	3963	1	181111	NM_077050	-4546	WBGene00017571	jmjd-3.1	Lysine-specific demethylase jmjd-3.1
chrX	9737796	9738018	223	*	0	.	218.793	-1	3.5824	122	Promoter	6	9733309	9737735	4427	2	181185	NM_077236	-61	WBGene00008868	F15G9.5	hypothetical protein
chrX	11257078	11257561	484	*	0	.	114.573	-1	3.2324	242	Promoter	6	11257493	11259981	2489	1	181314	NM_001029172	0	WBGene00007266	C03A3.1	hypothetical protein
chrX	11379237	11379527	291	*	0	.	331.153	-1	3.5824	283	Downstream (2-3kb)	6	11376161	11377461	1301	2	181329	NM_077505	-1776	WBGene00006584	tni-1	Troponin I 1
chrX	13977428	13977911	484	*	0	.	152.482	-1	3.5824	242	Promoter	6	13977833	13978780	948	1	181507	NM_077926	0	WBGene00009851	F48F7.6	hypothetical protein
chrX	16553832	16554315	484	*	0	.	133.332	-1	3.13108	242	Promoter	6	16551231	16553876	2646	2	187133	NM_078281	0	WBGene00019519	K08B5.2	hypothetical protein
chrX	16612276	16613080	805	*	0	.	158.179	-1	3.5824	524	Distal Intergenic	6	16613493	16616247	2755	1	181719	NM_078286	-413	WBGene00015547	ain-1	ALG-1 INteracting protein
chrX	16634775	16635056	282	*	0	.	305.499	-1	3.5824	116	Exon (NM_001129626/181720, exon 6 of 12)	6	16633368	16637212	3845	1	181720	NM_078288	1407	WBGene00015545	C06G1.1	hypothetical protein

## Sheet: F3M_up_N3MvF3M_intersect_CEH-18
seqnames	start	end	width	strand	score	name	thickStart	thickEnd	itemRgb	blockCount	annotation	geneChr	geneStart	geneEnd	geneLength	geneStrand	geneId	transcriptId	distanceToTSS	ENSEMBL	SYMBOL	GENENAME
chrI	518356	518839	484	*	0	.	187.446	-1	3.5824	242	Intron (NM_001306267/171643, intron 1 of 5)	1	511478	519646	8169	2	171643	NM_001306267	807	WBGene00022037	acs-13	fatty Acid CoA Synthetase family
chrI	1481483	1481671	189	*	0	.	294.216	-1	3.5824	121	Distal Intergenic	1	1483106	1490321	7216	1	171715	NM_058459	-1435	WBGene00001115	dyb-1	Dystrobrevin-1
chrI	1481563	1482046	484	*	0	.	121.805	-1	3.19229	242	Distal Intergenic	1	1483106	1490321	7216	1	171715	NM_058459	-1060	WBGene00001115	dyb-1	Dystrobrevin-1
chrI	3516180	3516663	484	*	0	.	138.677	-1	3.5824	242	Promoter	1	3516552	3523250	6699	1	171920	NM_058772	0	WBGene00021636	pcaf-1	P300/CBP Associated Factor homolog
chrI	3721363	3722015	653	*	0	.	470.505	-1	3.5824	298	Distal Intergenic	1	3713764	3721060	7297	2	266825	NM_058805	-303	WBGene00003040	lin-59	Probable histone-lysine N-methyltransferase lin-59
chrI	3740409	3740627	219	*	0	.	264.015	-1	3.5824	128	Promoter	1	3734429	3740334	5906	2	171942	NM_058808	-75	WBGene00004147	larp-5	LARP (RNA binding La related protein) homolog
chrI	4535939	4536295	357	*	0	.	373.417	-1	3.5824	208	Downstream (1-2kb)	1	4528372	4534798	6427	2	172054	NM_182079	-1141	WBGene00022473	bet-1	Bromodomain-containing protein bet-1
chrI	4672094	4672577	484	*	0	.	152.953	-1	3.5824	242	Distal Intergenic	1	4666146	4671714	5569	2	172077	NM_001025787	-380	WBGene00006961	xnp-1	Transcriptional regulator ATRX homolog
chrI	4926332	4926815	484	*	0	.	215.272	-1	3.5824	242	Promoter	1	4926733	4927934	1202	1	172111	NM_182065	0	WBGene00017886	F28B3.5	hypothetical protein
chrI	6779992	6780475	484	*	0	.	152.784	-1	3.5824	242	Promoter	1	6774516	6779906	5391	2	172398	NM_059539	-86	WBGene00004111	pqn-21	Prion-like-(Q/N-rich)-domain-bearing protein
chrI	7125517	7126000	484	*	0	.	188.473	-1	3.5824	242	Exon (NM_059617/172450, exon 3 of 10)	1	7123060	7128137	5078	2	172450	NM_059617	2137	WBGene00006753	unc-14	hypothetical protein
chrI	7128275	7128475	201	*	0	.	370.012	-1	3.5824	97	Promoter	1	7123060	7128137	5078	2	172450	NM_059617	-138	WBGene00006753	unc-14	hypothetical protein
chrI	7149468	7149951	484	*	0	.	147.448	-1	3.5824	242	Downstream (<1kb)	1	7150045	7151815	1771	2	172454	NM_059622	1864	WBGene00010645	fecl-1	FErroChelatase-Like
chrI	7595489	7595773	285	*	0	.	343.349	-1	3.5824	168	Distal Intergenic	1	7596526	7601903	5378	1	172518	NM_001263616	-753	WBGene00008419	wdr-23	DDB1-and CUL4-associated factor 11 homolog
chrI	7595616	7596099	484	*	0	.	117.141	-1	3.21827	242	Distal Intergenic	1	7596526	7601903	5378	1	172518	NM_001263616	-427	WBGene00008419	wdr-23	DDB1-and CUL4-associated factor 11 homolog
chrI	7947965	7948448	484	*	0	.	140.329	-1	3.5824	242	Exon (NM_059792/266843, exon 7 of 10)	1	7946944	7951544	4601	2	266843	NM_059792	3096	WBGene00002179	jph-1	JunctoPHilin
chrI	8013296	8013779	484	*	0	.	131.651	-1	3.13872	242	Distal Intergenic	1	8014468	8019071	4604	1	172581	NM_001047180	-689	WBGene00008311	rskn-2	Putative ribosomal protein S6 kinase alpha-2;Ribosomal protein S6 kinase
chrI	8018939	8019422	484	*	0	.	127.563	-1	3.16425	242	Exon (NM_001047180/172581, exon 12 of 12)	1	8018145	8019071	927	1	172581	NM_001047181	794	WBGene00008311	rskn-2	Putative ribosomal protein S6 kinase alpha-2;Ribosomal protein S6 kinase
chrI	8416014	8416497	484	*	0	.	114.718	-1	3.23189	242	Exon (NM_059882/172627, exon 8 of 8)	1	8416832	8424865	8034	1	172628	NM_001128970	-335	WBGene00004117	sin-3	Paired amphipathic helix protein sin-3
chrI	8747854	8748337	484	*	0	.	131.845	-1	3.13788	242	Downstream (1-2kb)	1	8743849	8746925	3077	2	183252	NM_059965	-929	WBGene00007976	C36B1.9	hypothetical protein
chrI	9141528	9142011	484	*	0	.	121.59	-1	3.19303	242	Promoter	1	9138812	9141520	2709	2	172739	NM_060050	-8	WBGene00014119	ZK858.6	Transmembrane 9 superfamily member
chrI	9343708	9344191	484	*	0	.	234.915	-1	3.5824	242	Downstream (<1kb)	1	9335965	9341897	5933	2	172760	NM_001025828	-1811	WBGene00003026	lin-41	Protein lin-41
chrI	9625925	9626233	309	*	0	.	584.653	-1	3.5824	151	Promoter	1	9626275	9630358	4084	1	3565010	NM_001026439	-42	WBGene00002027	hsr-9	Protein hsr-9
chrI	9664959	9665442	484	*	0	.	202.43	-1	3.5824	242	Promoter	1	9665311	9668436	3126	1	172814	NM_001025808	0	WBGene00000466	cel-1	mRNA guanylyltransferase
chrI	10468873	10469356	484	*	0	.	161.789	-1	3.5824	242	Intron (NM_001306535/172925, intron 2 of 7)	1	10464597	10468479	3883	2	172925	NM_001306536	-394	WBGene00001112	duo-3	Deubiquitylating with USP/UBP and OTU domains
chrI	10469082	10469565	484	*	0	.	124.383	-1	3.17888	242	Exon (NM_001306535/172925, exon 2 of 8)	1	10464597	10469961	5365	2	172925	NM_001306535	396	WBGene00001112	duo-3	Deubiquitylating with USP/UBP and OTU domains
chrI	13663195	13663550	356	*	0	.	471.36	-1	3.5824	193	Promoter	1	13663537	13674884	11348	1	173238	NM_060995	0	WBGene00012234	W04A4.5	hypothetical protein
chrII	255229	255463	235	*	0	.	380.78	-1	3.5824	125	Promoter	2	241114	255182	14069	2	173410	NM_061286	-47	WBGene00004166	pqn-85	Nipped-B protein;Nipped-B-like protein pqn-85
chrII	5055279	5055467	189	*	0	.	300.504	-1	3.5824	107	Promoter	2	5054261	5055155	895	2	173872	NM_062530	-124	WBGene00002068	ify-1	Securin-like protein
chrII	5660942	5661425	484	*	0	.	129.84	-1	3.15096	242	Promoter	2	5661194	5664370	3177	1	173960	NM_170997	0	WBGene00016115	mdt-26	MeDiaTor
chrII	5661766	5662110	345	*	0	.	338.915	-1	3.5824	191	Exon (NM_170997/173960, exon 2 of 8)	2	5661194	5664372	3179	1	173960	NR_151553	572	WBGene00016115	mdt-26	MeDiaTor
chrII	7104953	7105436	484	*	0	.	179.672	-1	3.5824	242	Promoter	2	7101533	7105001	3469	2	174165	NM_001346630	0	WBGene00017349	farl-11	FAR (Factor ARrest) Like
chrII	7478768	7478959	192	*	0	.	240.338	-1	3.5824	108	Promoter	2	7476350	7478532	2183	2	174216	NM_001026876	-236	WBGene00000101	aka-1	A Kinase Anchor protein
chrII	7870600	7871083	484	*	0	.	126.197	-1	3.17056	242	Downstream (<1kb)	2	7866870	7870153	3284	2	174269	NM_063255	-447	WBGene00011639	ztf-17	Zinc finger transcription factor family protein 17
chrII	9974931	9975414	484	*	0	.	161.716	-1	3.5824	242	Promoter	2	9971554	9974704	3151	2	174556	NM_063754	-227	WBGene00011276	aakg-5	AMP-Activated protein Kinase Gamma subunit
chrII	10384630	10385113	484	*	0	.	185.764	-1	3.5824	242	Promoter	2	10385353	10387764	2412	1	188340	NM_063834	-240	WBGene00011661	ztf-27	Zinc finger putative Transcription Factor family
chrII	11293367	11293850	484	*	0	.	124.772	-1	3.17696	242	Promoter	2	11290979	11293476	2498	2	174724	NM_064012	0	WBGene00008165	C47G2.4	LMBR1 domain-containing protein 2 homolog
chrII	11724393	11724876	484	*	0	.	147.096	-1	3.5824	242	Downstream (2-3kb)	2	11725323	11726431	1109	1	174798	NM_001356894	-447	WBGene00002262	ldh-1	L-lactate dehydrogenase
chrII	13908526	13909009	484	*	0	.	205.275	-1	3.5824	242	Promoter	2	13908925	13915119	6195	1	175043	NM_064513	0	WBGene00012198	W02B8.2	hypothetical protein
chrII	14143899	14144023	125	*	0	.	137.036	-1	3.10958	59	Promoter	2	14142949	14143822	874	2	175068	NR_051891	-77	WBGene00012228	W03H9.2	hypothetical protein
chrIII	3456296	3456533	238	*	0	.	282.588	-1	3.5824	122	Promoter	3	3456600	3460045	3446	1	175448	NM_065311	-67	WBGene00007921	C34C12.2	hypothetical protein
chrIII	5108731	5109214	484	*	0	.	138.246	-1	3.5824	242	Distal Intergenic	3	5109701	5130543	20843	1	175697	NM_171117	-487	WBGene00004728	sax-2	Sensory AXon guidance
chrIII	5202557	5203040	484	*	0	.	131.821	-1	3.13809	242	Downstream (<1kb)	3	5196968	5199660	2693	2	175710	NM_065702	-2897	WBGene00001262	emb-8	NADPH--cytochrome P450 reductase
chrIII	6303091	6303574	484	*	0	.	165.771	-1	3.5824	242	Distal Intergenic	3	6299797	6302496	2700	2	175892	NM_065981	-595	WBGene00018564	F47D12.9	Uncharacterized WD repeat-containing protein F47D12.9
chrIII	6988004	6988487	484	*	0	.	254.109	-1	3.5824	242	Distal Intergenic	3	6990356	7002175	11820	1	175980	NM_001276777	-1869	WBGene00004182	prk-1	Pim (mammalian oncogene) Related Kinase
chrIII	8093053	8093536	484	*	0	.	185.841	-1	3.5824	242	Promoter	3	8093585	8096168	2584	1	187077	NM_066366	-49	WBGene00019456	K06H7.2	hypothetical protein
chrIII	8358167	8358650	484	*	0	.	149.993	-1	3.5824	242	Promoter	3	8358627	8362088	3462	1	176180	NM_001027528	0	WBGene00007008	rfp-1	E3 ubiquitin-protein ligase bre-1
chrIII	8794768	8795251	484	*	0	.	140.582	-1	3.5824	242	Intron (NR_136383/176237, intron 5 of 14)	3	8792847	8806271	13425	1	176237	NR_136383	1921	WBGene00006975	zfp-1	Zinc Finger Protein
chrIII	8801608	8802373	766	*	0	.	595.168	-1	3.5824	460	Intron (NR_136383/176237, intron 10 of 14)	3	8802954	8805625	2672	1	176237	NM_001027440	-581	WBGene00006975	zfp-1	Zinc Finger Protein
chrIII	9905378	9905861	484	*	0	.	135.903	-1	3.11782	242	Intron (NM_001268117/176401, intron 1 of 10)	3	9898998	9907043	8046	2	176401	NM_001268117	1182	WBGene00009594	cyld-1	CYLinDromatosis (human disease gene) homolog
chrIII	13464893	13465376	484	*	0	.	148.372	-1	3.5824	242	Exon (NM_067382/176774, exon 5 of 6)	3	13464818	13466295	1478	2	176774	NM_067382	919	WBGene00000407	cdk-5	Cyclin-dependent-like kinase 5
chrIII	13564814	13565297	484	*	0	.	187.79	-1	3.5824	242	Promoter	3	13563483	13564919	1437	2	176788	NM_171235	0	WBGene00011474	aldo-1	Fructose-bisphosphate aldolase 1
chrIV	5085514	5085997	484	*	0	.	116.91	-1	3.2195	242	Exon (NM_068318/177280, exon 5 of 6)	4	5084394	5086431	2038	1	177280	NM_001306812	1120	WBGene00015330	C02B10.5	hypothetical protein
chrIV	7723465	7723948	484	*	0	.	162.507	-1	3.5824	242	Promoter	4	7720633	7723197	2565	2	177553	NM_068861	-268	WBGene00016846	C50F7.6	hypothetical protein
chrIV	8229429	8229912	484	*	0	.	187.726	-1	3.5824	242	Promoter	4	8226743	8229354	2612	2	177618	NM_171398	-75	WBGene00003656	nhr-66	Nuclear Hormone Receptor family
chrIV	8432845	8433067	223	*	0	.	294.689	-1	3.5824	108	Promoter	4	8433142	8437571	4430	1	177644	NM_069035	-75	WBGene00020824	T26A8.1	hypothetical protein
chrIV	11571427	11571910	484	*	0	.	126.488	-1	3.16918	242	Promoter	4	11571970	11578358	6389	1	178079	NM_001307035	-60	WBGene00006406	srgp-1	Slit-Robo GAP homolog
chrIV	12404071	12404554	484	*	0	.	167.805	-1	3.5824	242	Promoter	4	12404435	12408440	4006	1	178191	NM_069967	0	WBGene00001580	gex-3	Membrane-associated protein gex-3
chrIV	12615324	12615807	484	*	0	.	127.813	-1	3.16286	242	Distal Intergenic	4	12606104	12614719	8616	2	178217	NM_070016	-605	WBGene00013223	efa-6	Exchange factor for Arf-6
chrIV	12621621	12622104	484	*	0	.	116.378	-1	3.22298	242	Downstream (<1kb)	4	12606104	12614719	8616	2	178217	NM_070016	-6902	WBGene00013223	efa-6	Exchange factor for Arf-6
chrIV	15471539	15471717	179	*	0	.	294	-1	3.5824	65	Promoter	4	15471288	15471482	195	2	178432	NM_001129358	-57	WBGene00013530	ntl-11	NOT-Like (yeast CCR4/NOT complex component)
chrIV	16995362	16995845	484	*	0	.	154.382	-1	3.5824	242	Promoter	4	16995822	17014586	18765	1	3565076	NM_001047548	0	WBGene00004403	rom-4	Rhomboid-like protein
chrIV	17087566	17087752	187	*	0	.	180.5	-1	3.5824	94	Promoter	4	17086789	17087329	541	2	178482	NM_001129333	-237	WBGene00013803	snx-13	Sorting NeXin
chrV	2809451	2809934	484	*	0	.	164.044	-1	3.5824	242	Downstream (2-3kb)	5	2810490	2811953	1464	1	178742	NM_071360	-556	WBGene00018823	F54E2.1	hypothetical protein
chrV	6030691	6030851	161	*	0	.	255.876	-1	3.5824	42	Intron (NR_136375/178990, intron 3 of 10)	5	6026513	6030375	3863	2	178990	NM_001047644	-316	WBGene00000980	dhs-17	DeHydrogenases, Short chain
chrV	7215835	7216318	484	*	0	.	117.389	-1	3.21617	242	Downstream (1-2kb)	5	7205952	7214887	8936	2	179109	NM_072427	-948	WBGene00015743	soap-1	Sorting Of Apical Proteins
chrV	10808000	10808218	219	*	0	.	303.626	-1	3.5824	105	Promoter	5	10806197	10807895	1699	2	179500	NM_001269330	-105	WBGene00006481	plrg-1	PLeiotropic ReGulator (vertebrate) homolog
chrV	10857240	10857723	484	*	0	.	164.191	-1	3.5824	242	Intron (NM_001307768/179505, intron 1 of 7)	5	10852883	10855241	2359	2	179505	NM_001129481	-1999	WBGene00010012	saeg-1	Suppressor of activated egl-4 protein 1
chrV	10858409	10858751	343	*	0	.	459.776	-1	3.5824	168	Intron (NM_001307768/179505, intron 1 of 7)	5	10852883	10859781	6899	2	179505	NM_001307768	1030	WBGene00010012	saeg-1	Suppressor of activated egl-4 protein 1
chrV	10871460	10871745	286	*	0	.	269.266	-1	3.5824	150	Distal Intergenic	5	10852883	10865699	12817	2	179505	NM_073368	-5761	WBGene00010012	saeg-1	Suppressor of activated egl-4 protein 1
chrV	11140289	11140772	484	*	0	.	192.976	-1	3.5824	242	Exon (NM_001269374/182348, exon 6 of 6)	5	11141498	11143063	1566	1	179544	NM_073432	-726	WBGene00007388	folt-1	Folate transporter 1
chrV	12269292	12269775	484	*	0	.	190.18	-1	3.5824	242	Promoter	5	12265883	12269310	3428	2	179682	NM_001028810	0	WBGene00006677	twk-24	TWiK family of potassium channels
chrV	13041623	13042106	484	*	0	.	162.293	-1	3.5824	242	Promoter	5	13038756	13041721	2966	2	179789	NM_073858	0	WBGene00012337	W07G4.3	hypothetical protein
chrV	13789562	13789718	157	*	0	.	294.064	-1	3.5824	78	Promoter	5	13789887	13795919	6033	1	179874	NM_001047656	-169	WBGene00009975	F53C11.5	hypothetical protein
chrV	14002370	14002853	484	*	0	.	140.712	-1	3.5824	242	Promoter	5	13987690	14002397	14708	2	179894	NM_001047667	0	WBGene00010259	ric-7	hypothetical protein
chrV	16553041	16553163	123	*	0	.	184.064	-1	3.5824	41	Promoter	5	16553335	16562792	9458	1	180110	NM_001269786	-172	WBGene00012524	Y32B12B.4	hypothetical protein
chrX	2089420	2089903	484	*	0	.	128.286	-1	3.16067	242	Promoter	6	2089800	2092729	2930	1	180522	NM_001029525	0	WBGene00003087	lsy-2	hypothetical protein
chrX	3089986	3090469	484	*	0	.	170.388	-1	3.5824	242	Promoter	6	3090437	3092211	1775	1	180596	NM_171648	0	WBGene00018701	pccb-1	Propionyl Coenzyme A Carboxylase Beta subunit
chrX	3099766	3100249	484	*	0	.	211.179	-1	3.5824	242	Promoter	6	3095671	3099837	4167	2	180598	NM_076129	0	WBGene00018703	sec-3	Exocyst complex component 1
chrX	3245787	3246270	484	*	0	.	124.291	-1	3.17984	242	Promoter	6	3244266	3245767	1502	2	180614	NM_076152	-20	WBGene00018238	F40F4.7	hypothetical protein
chrX	5942205	5942688	484	*	0	.	252.739	-1	3.5824	242	Promoter	6	5937960	5942039	4080	2	180859	NM_076592	-166	WBGene00016716	acs-17	fatty Acid CoA Synthetase family
chrX	7254477	7254960	484	*	0	.	115.555	-1	3.22677	242	Promoter	6	7245420	7254563	9144	2	180988	NM_076818	0	WBGene00018520	F46H5.4	hypothetical protein
chrX	8252201	8252684	484	*	0	.	121.425	-1	3.19451	242	Promoter	6	8248437	8252254	3818	2	181080	NM_076992	0	WBGene00019781	M60.6	hypothetical protein
chrX	9113756	9114239	484	*	0	.	121.962	-1	3.18986	242	Promoter	6	9114368	9116603	2236	1	181149	NM_077138	-129	WBGene00016087	C25A11.2	hypothetical protein
chrX	10332205	10332688	484	*	0	.	118.146	-1	3.21228	242	Downstream (1-2kb)	6	10330718	10331873	1156	2	187678	NM_077332	-332	WBGene00011105	R07E3.4	hypothetical protein
chrX	10377598	10378081	484	*	0	.	304.39	-1	3.5824	242	Promoter	6	10373602	10377610	4009	2	185870	NM_077338	0	WBGene00004375	rme-4	Receptor Mediated Endocytosis
chrX	11206943	11207426	484	*	0	.	115.692	-1	3.22626	242	Promoter	6	11204456	11207088	2633	2	181309	NM_077470	0	WBGene00002029	hst-2	Heparan sulfate 2-O-sulfotransferase hst-2
chrX	12975577	12976060	484	*	0	.	182.904	-1	3.5824	242	Promoter	6	12969263	12975643	6381	2	181428	NM_077754	0	WBGene00004089	ppk-3	PIP Kinase
chrX	13598039	13598522	484	*	0	.	133.661	-1	3.12915	242	Promoter	6	13598471	13599391	921	1	181481	NM_077876	0	WBGene00000262	bra-1	BMP Receptor Associated protein family
chrX	14127282	14127765	484	*	0	.	118.162	-1	3.21192	242	Promoter	6	14127881	14133314	5434	1	181522	NM_077953	-116	WBGene00009233	F28H6.4	hypothetical protein
chrX	14975510	14975993	484	*	0	.	179.001	-1	3.5824	242	Promoter	6	14976118	14978554	2437	1	181593	NM_078085	-125	WBGene00008975	F20D1.3	hypothetical protein
chrX	14983285	14983768	484	*	0	.	159.443	-1	3.5824	242	Promoter	6	14983561	14987232	3672	1	181595	NM_078089	0	WBGene00004317	rbg-1	Rab3 GTPase-activating protein catalytic subunit
chrX	15181566	15181728	163	*	0	.	263.837	-1	3.5824	78	Promoter	6	15178667	15181455	2789	2	181612	NM_078122	-111	WBGene00011680	T10B10.3	hypothetical protein
chrX	15707477	15707773	297	*	0	.	409.853	-1	3.5824	151	Intron (NR_053033/13192567, intron 1 of 1)	6	15710077	15716232	6156	1	181661	NM_001029827	-2304	WBGene00003638	nhr-48	Nuclear hormone receptor family member nhr-48
chrX	15849335	15849818	484	*	0	.	205.703	-1	3.5824	242	Promoter	6	15849900	15851567	1668	1	181671	NM_078205	-82	WBGene00010339	acl-1	Putative 1-acyl-sn-glycerol-3-phosphate acyltransferase acl-1
chrX	16872388	16872871	484	*	0	.	175.94	-1	3.5824	242	Promoter	6	16872926	16878042	5117	1	181737	NM_078326	-55	WBGene00020630	T20F7.1	hypothetical protein

## Sheet: N3U_up_N3UvF3U_intersect_MAB-5
seqnames	start	end	width	strand	score	name	thickStart	thickEnd	itemRgb	blockCount	annotation	geneChr	geneStart	geneEnd	geneLength	geneStrand	geneId	transcriptId	distanceToTSS	ENSEMBL	SYMBOL	GENENAME
chrI	535414	535514	101	*	0	.	73.8364	-1	3.65715	41	Promoter	1	535808	536493	686	1	171646	NM_001306344	-294	WBGene00022042	icd-2	Nascent polypeptide-associated complex subunit alpha
chrI	1067013	1067357	345	*	0	.	62.6103	-1	3.65715	172	Promoter	1	1054362	1066869	12508	2	189590	NM_058415	-144	WBGene00021334	vps-4	related to yeast Vacuolar Protein Sorting factor
chrI	1339999	1340343	345	*	0	.	35.9099	-1	3.65715	172	Downstream (1-2kb)	1	1340703	1341084	382	1	266820	NM_058441	-360	WBGene00004888	smo-1	Small ubiquitin-related modifier
chrI	1435462	1435806	345	*	0	.	31.1667	-1	3.65715	172	Distal Intergenic	1	1436292	1441214	4923	1	171710	NM_058453	-486	WBGene00022373	mrpl-15	Mitochondrial Ribosomal Protein, Large
chrI	1701050	1701394	345	*	0	.	33.7847	-1	3.65715	172	Promoter	1	1701372	1701698	327	1	190601	NM_058482	0	WBGene00003080	lsm-6	LSM Sm-like protein
chrI	2728637	2728981	345	*	0	.	31.1616	-1	3.65715	172	Downstream (2-3kb)	1	2730010	2731245	1236	1	171835	NM_058632	-1029	WBGene00022127	yop-1	Receptor expression-enhancing protein
chrI	3032743	3033087	345	*	0	.	51.8883	-1	3.65715	172	Promoter	1	3031338	3032938	1601	2	171877	NM_058692	0	WBGene00021845	rpb-7	RNA Polymerase II (B) subunit
chrI	3162483	3162827	345	*	0	.	53.7145	-1	3.65715	172	Promoter	1	3162816	3163513	698	1	171889	NM_058713	0	WBGene00021829	mrpl-17	Mitochondrial Ribosomal Protein, Large
chrI	3546883	3547227	345	*	0	.	33.6426	-1	3.65715	172	Promoter	1	3539647	3546894	7248	2	171922	NM_058775	0	WBGene00004389	rnp-6	RNP (RRM RNA binding domain) containing
chrI	3787603	3787947	345	*	0	.	31.5848	-1	3.65715	172	Promoter	1	3788042	3788862	821	1	171949	NM_001025846	-95	WBGene00004425	rpl-13	60S ribosomal protein L13
chrI	4178424	4178768	345	*	0	.	38.1222	-1	3.65715	172	Promoter	1	4177418	4178435	1018	2	172010	NM_058919	0	WBGene00020038	R12E2.13	hypothetical protein
chrI	4703179	4703523	345	*	0	.	29.7203	-1	3.65715	172	Downstream (2-3kb)	1	4704622	4705713	1092	1	172081	NM_059026	-1099	WBGene00021112	W09C3.4	Probable DNA-directed RNA polymerase III subunit RPC6
chrI	5485842	5486186	345	*	0	.	35.0794	-1	3.65715	172	Promoter	1	5484830	5485593	764	2	172201	NM_059207	-249	WBGene00004431	rpl-19	60S ribosomal protein L19
chrI	5609006	5609350	345	*	0	.	32.564	-1	3.65715	172	Promoter	1	5607926	5608836	911	2	185872	NM_059239	-170	WBGene00006726	ubl-5	Ubiquitin-like protein 5
chrI	6220865	6221209	345	*	0	.	48.0798	-1	3.65715	172	Promoter	1	6220149	6220750	602	2	172313	NM_059394	-115	WBGene00004486	rps-17	40S ribosomal protein S17
chrI	7082105	7082449	345	*	0	.	44.7062	-1	3.65715	172	Distal Intergenic	1	7080416	7081500	1085	2	172441	NM_059604	-605	WBGene00009050	F22D6.2	hypothetical protein
chrI	7188236	7188580	345	*	0	.	35.9231	-1	3.65715	172	Promoter	1	7188539	7190490	1952	1	172457	NM_059632	0	WBGene00010872	M05B5.4	hypothetical protein
chrI	7283682	7284026	345	*	0	.	55.447	-1	3.65715	172	Promoter	1	7283130	7283740	611	2	172474	NM_059657	0	WBGene00009004	pfd-6	Probable prefoldin subunit 6
chrI	7314336	7314680	345	*	0	.	48.1928	-1	3.65715	172	Promoter	1	7313675	7314274	600	2	3565846	NM_001263542	-62	WBGene00008768	F13G3.10	hypothetical protein
chrI	8024523	8024867	345	*	0	.	52.3711	-1	3.65715	172	Promoter	1	8023252	8024403	1152	2	172582	NM_059806	-120	WBGene00000869	cyc-1	CYtochrome C
chrI	8409873	8409997	125	*	0	.	97.1507	-1	3.65715	88	Promoter	1	8408161	8409731	1571	2	172626	NM_059880	-142	WBGene00003014	lin-28	Protein lin-28
chrI	8426707	8427051	345	*	0	.	78.354	-1	3.65715	172	Downstream (<1kb)	1	8425166	8426075	910	2	172629	NM_001128971	-632	WBGene00008530	F02E9.5	hypothetical protein
chrI	8761415	8761759	345	*	0	.	62.0867	-1	3.65715	172	Distal Intergenic	1	8763056	8765184	2129	1	172687	NM_059970	-1297	WBGene00003052	lmn-1	Lamin-1
chrI	9474801	9475145	345	*	0	.	39.8659	-1	3.65715	172	Promoter	1	9472697	9474779	2083	2	172774	NM_060113	-22	WBGene00009260	calm-1	CALMyrin (Calcium and Integrin Binding protein) homolog
chrI	9619886	9620098	213	*	0	.	159.097	-1	3.65715	119	Promoter	1	9618403	9619757	1355	2	172802	NM_060151	-129	WBGene00003036	lin-53	Probable histone-binding protein lin-53
chrI	9688736	9689080	345	*	0	.	55.7929	-1	3.65715	172	Promoter	1	9689202	9690046	845	1	172818	NM_060175	-122	WBGene00004426	rpl-14	Ribosomal Protein, Large subunit
chrI	9725253	9725597	345	*	0	.	39.3218	-1	3.65715	172	Exon (NM_170911/172823, exon 10 of 10)	1	9727217	9727887	671	1	191616	NM_060185	-1620	WBGene00000430	ceh-5	Homeobox protein ceh-5
chrI	9787694	9788038	345	*	0	.	46.6333	-1	3.65715	172	Downstream (2-3kb)	1	9785933	9787390	1458	2	172831	NM_001264283	-304	WBGene00006528	tba-1	Tubulin alpha chain
chrI	9979792	9980006	215	*	0	.	146.847	-1	3.65715	118	Promoter	1	9976738	9979660	2923	2	172858	NM_060237	-132	WBGene00001226	eif-3.C	Eukaryotic translation initiation factor 3 subunit C
chrI	9988853	9989197	345	*	0	.	73.4197	-1	3.65715	172	Promoter	1	9989132	9989515	384	1	172860	NM_060241	0	WBGene00001877	his-68	Histone H2A
chrI	10551438	10551782	345	*	0	.	34.5592	-1	3.65715	172	Promoter	1	10551979	10552925	947	1	172938	NM_060359	-197	WBGene00009118	F25H2.4	hypothetical protein
chrI	10622774	10623118	345	*	0	.	32.3029	-1	3.65715	172	Promoter	1	10623178	10624065	888	1	172953	NM_060376	-60	WBGene00016622	mafr-1	Repressor of RNA polymerase III transcription MAF1
chrI	10642282	10642626	345	*	0	.	38.5197	-1	3.65715	172	Promoter	1	10640808	10642275	1468	2	172959	NM_060384	-7	WBGene00001228	eif-3.E	Eukaryotic translation initiation factor 3 subunit E
chrI	11517236	11517393	158	*	0	.	88.4116	-1	3.65715	67	Promoter	1	11517566	11526562	8997	1	185193	NM_001026269	-173	WBGene00009314	F32B4.4	hypothetical protein
chrI	11611309	11611653	345	*	0	.	50.0991	-1	3.65715	172	Promoter	1	11604611	11611301	6691	2	173044	NM_060558	-8	WBGene00007640	C17D12.7	hypothetical protein
chrI	11874931	11875275	345	*	0	.	31.8898	-1	3.65715	172	Intron (NR_050583/13182188, intron 2 of 0)	1	11877806	11887147	9342	1	173065	NM_001047239	-2531	WBGene00001045	dnj-27	DNaJ domain (prokaryotic heat shock protein)
chrI	12065231	12065575	345	*	0	.	33.4723	-1	3.65715	172	Downstream (<1kb)	1	12060838	12064887	4050	2	173086	NM_060648	-344	WBGene00002000	hrp-2	human HnRNP A1 homolog
chrI	12664855	12665199	345	*	0	.	64.2681	-1	3.65715	172	Promoter	1	12665120	12668734	3615	1	173136	NM_060806	0	WBGene00012037	T26E3.4	hypothetical protein
chrI	12966828	12967036	209	*	0	.	90.8891	-1	3.65715	70	Downstream (<1kb)	1	12964814	12966263	1450	2	173167	NM_001025879	-565	WBGene00006529	tba-2	Tubulin alpha-2 chain
chrI	13653787	13654131	345	*	0	.	52.4872	-1	3.65715	172	Promoter	1	13652992	13653685	694	2	173235	NM_060990	-102	WBGene00004445	rpl-31	60S ribosomal protein L31
chrI	14737346	14737690	345	*	0	.	45.7804	-1	3.65715	172	Promoter	1	14737703	14738622	920	1	173337	NM_061164	-13	WBGene00010583	K05C4.7	Armadillo repeat-containing protein 1
chrI	14789919	14790263	345	*	0	.	33.1667	-1	3.65715	172	Promoter	1	14790332	14790797	466	1	173347	NM_061177	-69	WBGene00006730	uev-1	Ubiquitin-conjugating enzyme E2
chrI	15033945	15034289	345	*	0	.	38.2056	-1	3.65715	172	Promoter	1	15034532	15035276	745	1	173372	NM_061221	-243	WBGene00009367	F33H2.3	Acidic leucine-rich nuclear phosphoprotein 32-related protein 1
chrII	24472	24816	345	*	0	.	63.9209	-1	3.65715	172	Promoter	2	24771	25381	611	1	3565099	NM_061235	0	WBGene00015291	C01B12.8	hypothetical protein
chrII	156015	156205	191	*	0	.	133.603	-1	3.65715	76	Promoter	2	154935	156007	1073	2	173400	NM_061271	-8	WBGene00020796	mrpl-28	Mitochondrial Ribosomal Protein, Large
chrII	285650	285994	345	*	0	.	58.462	-1	3.65715	172	Promoter	2	283916	285679	1764	2	173413	NM_061292	0	WBGene00015191	B0432.10	hypothetical protein
chrII	401285	401629	345	*	0	.	31.3593	-1	3.65715	172	Intron (NR_052766/13191439, intron 1 of 2)	2	402682	404120	1439	1	173430	NM_061324	-1053	WBGene00015403	clec-10	C-type LECtin
chrII	2289381	2289725	345	*	0	.	30.0999	-1	3.65715	172	Promoter	2	2289797	2290243	447	1	24104743	NM_001306560	-72	WBGene00235164	K09F6.13	hypothetical protein
chrII	4299325	4299525	201	*	0	.	128.77	-1	3.65715	108	Promoter	2	4299658	4300718	1061	1	173763	NM_062354	-133	WBGene00015297	sco-1	SCO (yeast Suppressor of Cytochrome Oxidase deficiency) homolog
chrII	4376842	4376943	102	*	0	.	90.4619	-1	3.65715	20	Distal Intergenic	2	4372946	4375716	2771	2	173773	NM_062371	-1126	WBGene00003825	ntl-2	NOT-Like (yeast CCR4/NOT complex component)
chrII	4698288	4698632	345	*	0	.	46.9979	-1	3.65715	172	Promoter	2	4696598	4698292	1695	2	173807	NM_062434	0	WBGene00004461	rpn-5	proteasome Regulatory Particle, Non-ATPase-like
chrII	5220712	5221056	345	*	0	.	43.0149	-1	3.65715	172	Promoter	2	5215623	5220674	5052	2	173894	NM_062579	-38	WBGene00001101	dsh-1	DiSHevelled related
chrII	5222791	5223135	345	*	0	.	29.6493	-1	3.65715	172	Intron (NM_001313591/173894, intron 1 of 9)	2	5214523	5223596	9074	2	173894	NM_001313591	461	WBGene00001101	dsh-1	DiSHevelled related
chrII	5389966	5390310	345	*	0	.	76.6554	-1	3.65715	172	Promoter	2	5388917	5389837	921	2	173916	NM_062614	-129	WBGene00003583	ndx-6	Putative nudix hydrolase 6
chrII	6250785	6251129	345	*	0	.	41.1229	-1	3.65715	172	Promoter	2	6251415	6252535	1121	1	174034	NM_062849	-286	WBGene00004015	phb-2	Mitochondrial prohibitin complex protein 2
chrII	6360810	6361154	345	*	0	.	40.1118	-1	3.65715	172	Promoter	2	6360373	6360879	507	2	174054	NM_062880	0	WBGene00019607	K10B2.4	Protein Asterix
chrII	6453429	6453773	345	*	0	.	37.3611	-1	3.65715	172	Promoter	2	6451163	6453388	2226	2	174067	NM_062898	-41	WBGene00019427	atg-16.2	Autophagic-related protein 16.2
chrII	7152085	7152255	171	*	0	.	109.283	-1	3.65715	101	Distal Intergenic	2	7152903	7155283	2381	1	174175	NM_063082	-648	WBGene00016173	fust-1	FUS/TLS RNA binding protein homolog
chrII	8329073	8329159	87	*	0	.	80.4396	-1	3.65715	54	Promoter	2	8327095	8328869	1775	2	174333	NR_133630	-204	WBGene00001840	hel-1	Spliceosome RNA helicase DDX39B homolog
chrII	8561331	8561533	203	*	0	.	167.932	-1	3.65715	109	Downstream (2-3kb)	2	8559808	8560955	1148	2	174367	NM_063406	-376	WBGene00002065	iff-2	Eukaryotic translation initiation factor 5A-2
chrII	8787506	8787667	162	*	0	.	103.153	-1	3.65715	63	Distal Intergenic	2	8790698	8790912	215	1	174406	NM_063469	-3031	WBGene00008563	F07H5.13	hypothetical protein
chrII	9099024	9099368	345	*	0	.	41.1641	-1	3.65715	172	Promoter	2	9099378	9100455	1078	1	174450	NM_063540	-10	WBGene00012000	T24H10.1	Putative transcription elongation factor S-II
chrII	9265104	9265267	164	*	0	.	74.2296	-1	3.65715	27	Distal Intergenic	2	9267539	9268296	758	1	174468	NM_063573	-2272	WBGene00007224	C01G6.2	hypothetical protein
chrII	10203196	10203540	345	*	0	.	30.6111	-1	3.65715	172	Distal Intergenic	2	10201125	10202230	1106	2	174583	NR_000803	-966	NA	tts-2	ncRNA
chrII	10248507	10248638	132	*	0	.	63.2868	-1	3.65715	59	Downstream (2-3kb)	2	10248991	10250871	1881	1	174590	NM_063809	-353	WBGene00010015	atad-3	ATPase family AAA domain-containing protein 3
chrII	11022058	11022402	345	*	0	.	33.0539	-1	3.65715	172	Promoter	2	11022374	11027799	5426	1	174689	NM_063962	0	WBGene00002957	let-858	Pre-mRNA-splicing factor CWC22 homolog
chrII	11453124	11453273	150	*	0	.	89.6866	-1	3.65715	76	Promoter	2	11453362	11455807	2446	1	174748	NR_138514	-89	WBGene00004698	rsp-1	Probable splicing factor, arginine/serine-rich 1
chrII	11652807	11653151	345	*	0	.	49.791	-1	3.65715	172	Promoter	2	11653127	11654093	967	1	174786	NM_064088	0	WBGene00004468	rpn-12	26S proteasome non-ATPase regulatory subunit 8
chrII	12768259	12768603	345	*	0	.	38.9087	-1	3.65715	172	Promoter	2	12767322	12768217	896	2	174908	NM_064316	-42	WBGene00012903	vps-2	related to yeast Vacuolar Protein Sorting factor
chrII	13976198	13976542	345	*	0	.	49.0504	-1	3.65715	172	Promoter	2	13973932	13976208	2277	2	175048	NM_064525	0	WBGene00012723	Y39G8B.2	hypothetical protein
chrII	14050380	14050724	345	*	0	.	31.4667	-1	3.65715	172	Distal Intergenic	2	14060090	14060561	472	1	175056	NM_064541	-9366	WBGene00012187	rpb-11	Probable DNA-directed RNA polymerase II subunit RPB11
chrII	14059880	14060069	190	*	0	.	121.104	-1	3.65715	89	Promoter	2	14060090	14060561	472	1	175056	NM_064541	-21	WBGene00012187	rpb-11	Probable DNA-directed RNA polymerase II subunit RPB11
chrIII	1080672	1080837	166	*	0	.	84.0027	-1	3.65715	69	Promoter	3	1080920	1081258	339	1	175273	NM_064929	-83	WBGene00022357	kbp-4	KNL (kinetochore null) Binding Protein
chrIII	1142922	1143074	153	*	0	.	80.2417	-1	3.65715	60	Promoter	3	1143190	1145144	1955	1	175281	NM_001027761	-116	WBGene00004891	smr-1	SMN (Survival of Motor Neuron protein) Related
chrIII	1202308	1202396	89	*	0	.	55.1969	-1	3.65715	43	Promoter	3	1202551	1205749	3199	1	175285	NM_064947	-155	WBGene00022489	Y119D3B.12	hypothetical protein
chrIII	1859639	1859819	181	*	0	.	118.028	-1	3.65715	84	Promoter	3	1859893	1860234	342	1	175331	NM_065066	-74	WBGene00000941	ddp-1	Mitochondrial import inner membrane translocase subunit Tim8
chrIII	2375894	2376238	345	*	0	.	38.2906	-1	3.65715	172	Promoter	3	2376200	2384570	8371	1	175356	NM_065143	0	WBGene00019199	H14E04.2	hypothetical protein
chrIII	2401159	2401503	345	*	0	.	31.8569	-1	3.65715	172	Promoter	3	2394403	2401208	6806	2	175357	NM_065147	0	WBGene00000506	cic-1	Cyclin-C
chrIII	2768717	2768889	173	*	0	.	100.225	-1	3.65715	114	Promoter	3	2764650	2768665	4016	2	175393	NM_065212	-52	WBGene00022182	swsn-3	SWI/SNF nucleosome remodeling complex component
chrIII	2785972	2786124	153	*	0	.	85.9297	-1	3.65715	80	Promoter	3	2782826	2785944	3119	2	175395	NM_065216	-28	WBGene00022185	Y71H2AM.20	Serine/threonine-protein phosphatase 2A activator
chrIII	3067947	3068291	345	*	0	.	35.6155	-1	3.65715	172	Promoter	3	3068335	3068592	258	1	175413	NM_001027466	-44	WBGene00006725	ubl-1	Ubiquitin-like protein 1
chrIII	4019829	4020173	345	*	0	.	43.0514	-1	3.65715	172	Promoter	3	4020160	4021777	1618	1	192054	NM_065406	0	WBGene00011367	snpc-3.4	SNAPc (Small Nuclear RNA Activating Complex) homolog
chrIII	4171000	4171344	345	*	0	.	56.6673	-1	3.65715	172	Promoter	3	4171340	4172065	726	1	175534	NM_065432	0	WBGene00007625	C16C10.4	Probable histone deacetylase complex subunit SAP18
chrIII	4504354	4504698	345	*	0	.	37.1839	-1	3.65715	172	Intron (NM_171104/175588, intron 2 of 7)	3	4499460	4501177	1718	2	175588	NM_065514	-3177	WBGene00000380	cct-5	T-complex protein 1 subunit epsilon
chrIII	5679025	5679240	216	*	0	.	200.511	-1	3.65715	117	Promoter	3	5678062	5678988	927	2	175785	NM_065819	-37	WBGene00018830	ska-3	Spindle and Kinetochore-Associated protein homolog
chrIII	5785591	5785935	345	*	0	.	37.9074	-1	3.65715	172	Intron (NR_071756/13221982, intron 1 of 0)	3	5784414	5785134	721	2	189611	NM_065848	-457	WBGene00021345	Y37B11A.3	hypothetical protein
chrIII	6431760	6432104	345	*	0	.	52.3939	-1	3.65715	172	Promoter	3	6431153	6431792	640	2	175912	NM_066008	0	WBGene00015487	mrps-17	28S ribosomal protein S17, mitochondrial
chrIII	7179793	7179882	90	*	0	.	60.9774	-1	3.65715	68	Promoter	3	7179030	7179579	550	2	176006	NM_066171	-214	WBGene00004483	rps-14	40S ribosomal protein S14
chrIII	7208025	7208144	120	*	0	.	69.6489	-1	3.65715	60	Downstream (1-2kb)	3	7208455	7209755	1301	1	176015	NM_066183	-311	WBGene00004417	rpl-6	60S ribosomal protein L6
chrIII	7520818	7520906	89	*	0	.	85.6686	-1	3.65715	57	Promoter	3	7521009	7521332	324	1	182382	NM_066251	-103	WBGene00015579	C07H6.2	hypothetical protein
chrIII	7766002	7766346	345	*	0	.	42.331	-1	3.65715	172	Promoter	3	7763833	7766049	2217	2	176088	NM_066289	0	WBGene00022792	ZK686.2	Putative ATP-dependent RNA helicase ZK686.2
chrIII	7771128	7771291	164	*	0	.	75.8017	-1	3.65715	74	Downstream (<1kb)	3	7769215	7769966	752	2	176090	NM_066291	-1162	WBGene00022794	snu-23	Putative zinc finger matrin-type protein snu-23
chrIII	7940864	7941208	345	*	0	.	47.5684	-1	3.65715	172	Promoter	3	7941154	7941534	381	1	259333	NM_171199	0	WBGene00016209	C29E4.12	Protein FMC1 homolog
chrIII	8043869	8044077	209	*	0	.	111.993	-1	3.65715	111	Downstream (<1kb)	3	8044487	8044780	294	1	187337	NM_066353	-410	WBGene00019680	K12H4.5	hypothetical protein
chrIII	8319118	8319462	345	*	0	.	55.7835	-1	3.65715	172	Promoter	3	8318746	8319138	393	2	176173	NM_066428	0	WBGene00017360	F10E9.11	hypothetical protein
chrIII	8767916	8768260	345	*	0	.	41.4387	-1	3.65715	172	Promoter	3	8768314	8769153	840	1	187502	NM_066534	-54	WBGene00019800	mtss-1	Single-stranded DNA-binding protein, mitochondrial
chrIII	9467134	9467478	345	*	0	.	48.1438	-1	3.65715	172	Promoter	3	9467469	9467793	325	1	176330	NM_066684	0	WBGene00000235	baf-1	Barrier-to-autointegration factor 1
chrIII	9631319	9631663	345	*	0	.	60.3397	-1	3.65715	172	Promoter	3	9630475	9631163	689	2	176363	NM_066732	-156	WBGene00006704	ubc-7	Probable ubiquitin-conjugating enzyme E2 7
chrIII	9780651	9780995	345	*	0	.	41.1857	-1	3.65715	172	Promoter	3	9781254	9781763	510	1	176383	NM_066764	-259	WBGene00006910	vha-1	V-type proton ATPase 16 kDa proteolipid subunit 1
chrIII	10218608	10218952	345	*	0	.	49.2	-1	3.65715	172	Promoter	3	10217346	10218644	1299	2	176438	NM_066864	0	WBGene00004326	rde-4	hypothetical protein
chrIII	10334089	10334196	108	*	0	.	51.6227	-1	3.65715	27	Promoter	3	10332526	10334018	1493	2	259530	NR_052690	-71	WBGene00011563	jmjd-4	JuMonJi (transcription factor) Domain protein
chrIII	10707083	10707427	345	*	0	.	49.158	-1	3.65715	172	Promoter	3	10700792	10707002	6211	2	176493	NR_002375	-81	WBGene00012658	Y39A1A.21	hypothetical protein
chrIII	10905203	10905547	345	*	0	.	52.0515	-1	3.65715	172	Intron (NM_001268159/176519, intron 1 of 4)	3	10906470	10908754	2285	1	176519	NM_001268160	-923	WBGene00006843	unc-119	Protein unc-119
chrIII	10907688	10908032	345	*	0	.	50.7763	-1	3.65715	172	Promoter	3	10907598	10908754	1157	1	176519	NM_001268161	90	WBGene00006843	unc-119	Protein unc-119
chrIII	11719412	11719756	345	*	0	.	43.5293	-1	3.65715	172	Promoter	3	11718988	11719440	453	2	176605	NM_067116	0	WBGene00001235	elb-1	ELongin B
chrIII	11946359	11946703	345	*	0	.	54.3765	-1	3.65715	172	Exon (NM_001129263/176629, exon 3 of 12)	3	11934166	11947009	12844	2	176629	NM_001129263	306	WBGene00013228	Y56A3A.7	hypothetical protein
chrIII	12351333	12351677	345	*	0	.	43.5371	-1	3.65715	172	Promoter	3	12351648	12354861	3214	1	176658	NM_067203	0	WBGene00013561	Y75B8A.31	FAM172 family protein homolog Y75B8A.31
chrIII	12598458	12598802	345	*	0	.	63.2416	-1	3.65715	172	Promoter	3	12596145	12598528	2384	2	176678	NM_067239	0	WBGene00013734	Y111B2A.10	hypothetical protein
chrIII	12978927	12979054	128	*	0	.	65.425	-1	3.65715	68	Promoter	3	12979175	12980112	938	1	176719	NM_067295	-121	WBGene00014177	frg-1	Protein FRG1 homolog
chrIII	13463031	13463205	175	*	0	.	112.534	-1	3.65715	84	Promoter	3	13463231	13464339	1109	1	176773	NM_001027628	-26	WBGene00006439	ant-1.1	Adenine Nucleotide Translocator
chrIII	13643606	13643843	238	*	0	.	206.061	-1	3.65715	126	Promoter	3	13642765	13643538	774	2	259546	NM_067417	-68	WBGene00011730	drr-2	Dietary Restriction Response (WT but not eat-2 lifespan increased)
chrIV	385509	385676	168	*	0	.	82.7965	-1	3.65715	63	Promoter	4	385909	386549	641	1	176858	NM_067514	-233	WBGene00004493	rps-24	Ribosomal Protein, Small subunit
chrIV	393435	393779	345	*	0	.	31.8906	-1	3.65715	172	Promoter	4	393234	393489	256	2	6418677	NM_001129325	0	WBGene00045249	T07A9.15	hypothetical protein
chrIV	443701	444045	345	*	0	.	32.7398	-1	3.65715	172	Promoter	4	443985	444696	712	1	176873	NM_067529	0	WBGene00022045	mrpl-55	Mitochondrial Ribosomal Protein, Large
chrIV	654816	655045	230	*	0	.	215.795	-1	3.65715	113	Promoter	4	653538	654571	1034	2	176891	NM_067563	-245	WBGene00004427	rpl-15	60S ribosomal protein L15
chrIV	1659142	1659359	218	*	0	.	135.033	-1	3.65715	99	Downstream (<1kb)	4	1659704	1659956	253	1	176975	NM_067714	-345	WBGene00004497	rps-28	40S ribosomal protein S28
chrIV	1709756	1710100	345	*	0	.	51.5148	-1	3.65715	172	Promoter	4	1708904	1709733	830	2	176978	NM_067724	-23	WBGene00003947	pbs-1	Proteasome subunit beta type
chrIV	2641112	2641199	88	*	0	.	61.7861	-1	3.65715	41	Promoter	4	2640546	2641010	465	2	177046	NM_171291	-102	WBGene00003161	mdf-2	MAD (yeast Mitosis arrest DeFicient) related
chrIV	2676414	2676573	160	*	0	.	81.0654	-1	3.65715	44	Promoter	4	2676553	2678071	1519	1	177052	NM_067842	0	WBGene00022376	Y94H6A.3	hypothetical protein
chrIV	2725816	2726160	345	*	0	.	38.0479	-1	3.65715	172	Promoter	4	2720565	2725819	5255	2	177057	NM_001028419	0	WBGene00022381	ubxn-2	UBX domain-containing protein 2
chrIV	3311267	3311611	345	*	0	.	37.8184	-1	3.65715	172	Promoter	4	3311568	3312925	1358	1	177099	NM_067917	0	WBGene00021082	zip-11	bZIP transcription factor family
chrIV	3519382	3519726	345	*	0	.	35.4248	-1	3.65715	172	Exon (NM_001038349/177112, exon 7 of 10)	4	3518147	3525572	7426	1	177112	NM_001307369	1235	WBGene00006769	unc-33	Protein unc-33
chrIV	3768755	3769099	345	*	0	.	36.6813	-1	3.65715	172	Distal Intergenic	4	3761432	3766820	5389	2	177140	NM_068011	-1935	WBGene00006869	vab-2	hypothetical protein
chrIV	3856335	3856679	345	*	0	.	50.8887	-1	3.65715	172	Exon (NM_068023/177144, exon 2 of 7)	4	3855850	3861124	5275	1	177144	NM_068023	485	WBGene00006970	zag-1	Zinc finger E-box-binding homeobox protein zag-1
chrIV	4049618	4049795	178	*	0	.	112.025	-1	3.65715	81	Promoter	4	4048123	4049435	1313	2	177161	NM_068065	-183	WBGene00003955	pcn-1	Proliferating cell nuclear antigen
chrIV	4650609	4650953	345	*	0	.	42.3853	-1	3.65715	172	Promoter	4	4651059	4651919	861	1	3565767	NM_001027987	-106	WBGene00006706	ubc-9	SUMO-conjugating enzyme UBC9
chrIV	5731613	5731957	345	*	0	.	35.2909	-1	3.65715	172	Promoter	4	5729802	5731671	1870	2	177349	NM_001306862	0	WBGene00019264	H35B03.2	hypothetical protein
chrIV	6646004	6646348	345	*	0	.	55.1893	-1	3.65715	172	Promoter	4	6646414	6646533	120	1	177433	NM_001026113	-66	WBGene00001858	hil-7	HIstone H1 Like
chrIV	6919376	6919720	345	*	0	.	58.4858	-1	3.65715	172	Promoter	4	6917281	6919398	2118	2	177458	NM_068666	0	WBGene00020687	ruvb-2	RuvB-like 2
chrIV	7002700	7003044	345	*	0	.	41.5933	-1	3.65715	172	Distal Intergenic	4	7003625	7009231	5607	1	177464	NM_068681	-581	WBGene00016084	cht-3	Chitinase-like protein C25A8.4
chrIV	7486215	7486559	345	*	0	.	58.0003	-1	3.65715	172	Promoter	4	7485834	7486217	384	2	177521	NM_068800	0	WBGene00001935	his-61	Histone H2A
chrIV	7487956	7488300	345	*	0	.	48.6303	-1	3.65715	172	Promoter	4	7487681	7487992	312	2	177522	NM_068802	0	WBGene00001875	his-60	Histone H4
chrIV	7709717	7710061	345	*	0	.	36.7333	-1	3.65715	172	Promoter	4	7709298	7709728	431	2	177550	NM_068857	0	WBGene00017999	emc-6	EMC Endoplasmic Membrane protein Complex (yeast EMC) homolog
chrIV	7791331	7791461	131	*	0	.	87.7152	-1	3.65715	90	Promoter	4	7790104	7791228	1125	2	177566	NR_131574	-103	WBGene00004703	rsp-6	Probable splicing factor, arginine/serine-rich 6
chrIV	7817858	7818202	345	*	0	.	41.8517	-1	3.65715	172	Promoter	4	7818263	7820746	2484	1	177570	NM_068898	-61	WBGene00004363	ric-3	Resistance to inhibitors of cholinesterase protein 3
chrIV	8015624	8015968	345	*	0	.	35.7221	-1	3.65715	172	Exon (NM_068940/182930, exon 8 of 8)	4	8016280	8016791	512	1	177599	NM_068941	-312	WBGene00016129	C26B2.7	hypothetical protein
chrIV	8476145	8476489	345	*	0	.	33.7761	-1	3.65715	172	Downstream (1-2kb)	4	8477183	8478128	946	1	177651	NM_171400	-694	WBGene00004995	spp-10	SaPosin-like Protein family
chrIV	8687805	8688149	345	*	0	.	60.1414	-1	3.65715	172	Promoter	4	8686975	8687809	835	2	177674	NM_069089	0	WBGene00017238	F08B4.7	U1 small nuclear ribonucleoprotein C
chrIV	8762426	8762770	345	*	0	.	29.6966	-1	3.65715	172	Distal Intergenic	4	8756735	8761996	5262	2	177685	NM_171407	-430	WBGene00002222	klp-11	Kinesin-like protein
chrIV	9074235	9074579	345	*	0	.	49.4619	-1	3.65715	172	Promoter	4	9074677	9076498	1822	1	177725	NM_069175	-98	WBGene00013880	mppb-1	Mitochondrial Processing Peptidase Beta
chrIV	9268159	9268503	345	*	0	.	40.1947	-1	3.65715	172	Distal Intergenic	4	9270097	9271618	1522	1	189435	NM_069218	-1594	WBGene00012436	flh-3	FLYWCH zinc finger transcription factor homolog
chrIV	11068294	11068638	345	*	0	.	48.835	-1	3.65715	172	Distal Intergenic	4	11066081	11067024	944	2	178003	NM_069660	-1270	WBGene00012383	ttr-17	TransThyretin-Related family domain
chrIV	11111209	11111553	345	*	0	.	32.7933	-1	3.65715	172	Promoter	4	11110216	11111044	829	2	178012	NM_069676	-165	WBGene00004474	rps-5	40S ribosomal protein S5
chrIV	12391252	12391391	140	*	0	.	68.2094	-1	3.65715	86	Promoter	4	12391594	12392033	440	1	178189	NM_069965	-203	WBGene00009219	dpm-3	Probable dolichol-phosphate mannosyltransferase subunit 3
chrIV	13704096	13704286	191	*	0	.	121.251	-1	3.65715	108	Promoter	4	13701774	13703955	2182	2	178338	NM_070246	-141	WBGene00006580	tlp-1	T lineage defect, LePtoderan tail
chrIV	13881906	13882004	99	*	0	.	57.8931	-1	3.65715	18	Promoter	4	13882242	13882584	343	1	178352	NM_001268834	-238	WBGene00004443	rpl-29	60S ribosomal protein L29
chrIV	14767813	14767973	161	*	0	.	100.043	-1	3.65715	78	Promoter	4	14766870	14767725	856	2	190379	NM_070381	-88	WBGene00013324	mrps-7	28S ribosomal protein S7, mitochondrial
chrIV	15036981	15037325	345	*	0	.	31.7822	-1	3.65715	172	Promoter	4	15037349	15038769	1421	1	178419	NM_001129339	-24	WBGene00012768	eef-1B.2	Probable elongation factor 1-beta/1-delta 2
chrIV	15646547	15646891	345	*	0	.	78.4435	-1	3.65715	172	Promoter	4	15646153	15646433	281	2	13206052	NM_001268945	-114	WBGene00185102	Y105C5A.1268	hypothetical protein
chrV	126628	126972	345	*	0	.	29.8109	-1	3.65715	172	Promoter	5	124378	126649	2272	2	189162	NM_070737	0	WBGene00020999	W03F9.1	Zinc finger protein ZPR1 homolog
chrV	773364	773482	119	*	0	.	57.1163	-1	3.65715	48	Promoter	5	773591	774715	1125	1	178587	NM_070921	-109	WBGene00019983	sti-1	Stress-induced-phosphoprotein 1
chrV	1060598	1060713	116	*	0	.	60.0072	-1	3.65715	37	Distal Intergenic	5	1061597	1067856	6260	1	190096	NM_070969	-884	WBGene00019624	K10C9.3	hypothetical protein
chrV	1471609	1471953	345	*	0	.	41.0997	-1	3.65715	172	Intron (NR_052229/13189113, intron 1 of 1)	5	1469060	1470962	1903	1	178639	NM_001313187	2549	WBGene00018757	tag-304	hypothetical protein
chrV	1575746	1576090	345	*	0	.	52.7871	-1	3.65715	172	Intron (NR_132503/178645, intron 1 of 6)	5	1577738	1584934	7197	1	178645	NM_071045	-1648	WBGene00000387	cdc-25.2	M-phase inducer phosphatase cdc-25.2
chrV	4194841	4195185	345	*	0	.	54.8453	-1	3.65715	172	Distal Intergenic	5	4195616	4199092	3477	1	178822	NM_171446	-431	WBGene00019276	H43I07.3	hypothetical protein
chrV	4491684	4492028	345	*	0	.	65.0288	-1	3.65715	172	Distal Intergenic	5	4497467	4510891	13425	1	178845	NM_001028998	-5439	WBGene00006796	unc-62	Homeobox protein unc-62
chrV	4495088	4495432	345	*	0	.	79.9749	-1	3.65715	172	Distal Intergenic	5	4497467	4510891	13425	1	178845	NM_001028998	-2035	WBGene00006796	unc-62	Homeobox protein unc-62
chrV	4507123	4507467	345	*	0	.	33.6323	-1	3.65715	172	Intron (NM_001028998/178845, intron 8 of 9)	5	4505814	4510891	5078	1	178845	NM_001029000	1309	WBGene00006796	unc-62	Homeobox protein unc-62
chrV	4507893	4508066	174	*	0	.	51.2831	-1	3.65715	80	Intron (NM_001028998/178845, intron 8 of 9)	5	4509913	4510891	979	1	178845	NM_001029001	-1847	WBGene00006796	unc-62	Homeobox protein unc-62
chrV	4508172	4508479	308	*	0	.	81.5573	-1	3.65715	135	Intron (NM_001028998/178845, intron 8 of 9)	5	4509913	4510891	979	1	178845	NM_001029001	-1434	WBGene00006796	unc-62	Homeobox protein unc-62
chrV	4509369	4509713	345	*	0	.	34.0746	-1	3.65715	172	Promoter	5	4509913	4510891	979	1	178845	NM_001029001	-200	WBGene00006796	unc-62	Homeobox protein unc-62
chrV	4694441	4694785	345	*	0	.	34.1288	-1	3.65715	172	Downstream (<1kb)	5	4692112	4692411	300	2	178860	NM_182355	-2030	WBGene00019357	cpg-8	Chondroitin proteoglycan 8
chrV	5768193	5768537	345	*	0	.	33.9013	-1	3.65715	172	Distal Intergenic	5	5770459	5771567	1109	1	178965	NM_072111	-1922	WBGene00018424	F44E7.2	hypothetical protein
chrV	5790866	5791210	345	*	0	.	74.9227	-1	3.65715	172	Promoter	5	5791235	5791976	742	1	185741	NM_072118	-25	WBGene00018431	F44E7.9	hypothetical protein
chrV	7060362	7060706	345	*	0	.	39.1319	-1	3.65715	172	Promoter	5	7059822	7060358	537	2	179092	NM_072391	-4	WBGene00021959	Y57E12AL.6	hypothetical protein
chrV	7237125	7237469	345	*	0	.	51.9011	-1	3.65715	172	Promoter	5	7235019	7237126	2108	2	179117	NM_072438	0	WBGene00015463	hpo-9	hypothetical protein
chrV	7728149	7728493	345	*	0	.	64.1109	-1	3.65715	172	Downstream (1-2kb)	5	7728947	7729422	476	1	259630	NM_171482	-454	WBGene00022410	Y97E10C.1	hypothetical protein
chrV	8000892	8001236	345	*	0	.	59.54	-1	3.65715	172	Promoter	5	8001463	8004284	2822	1	179174	NM_072657	-227	WBGene00022396	Y97E10AR.1	hypothetical protein
chrV	8210551	8210895	345	*	0	.	33.4459	-1	3.65715	172	Promoter	5	8208235	8210557	2323	2	179200	NM_072715	0	WBGene00019479	K07C11.7	UPF0046 protein K07C11.7
chrV	9095659	9096003	345	*	0	.	33.5677	-1	3.65715	172	Promoter	5	9096270	9097128	859	1	179290	NM_072958	-267	WBGene00017659	F21C10.10	hypothetical protein
chrV	10808021	10808193	173	*	0	.	96.4663	-1	3.65715	87	Promoter	5	10806197	10807895	1699	2	179500	NM_001269330	-126	WBGene00006481	plrg-1	PLeiotropic ReGulator (vertebrate) homolog
chrV	10897254	10897476	223	*	0	.	174.183	-1	3.65715	124	Promoter	5	10896880	10897135	256	2	179510	NM_073377	-119	WBGene00001303	emo-1	Protein transport protein Sec61 subunit gamma
chrV	11443647	11443991	345	*	0	.	30.037	-1	3.65715	172	Promoter	5	11442136	11443603	1468	2	186438	NM_001269393	-44	WBGene00010192	F57B7.2	hypothetical protein
chrV	11638593	11638937	345	*	0	.	50.5002	-1	3.65715	172	Downstream (2-3kb)	5	11631872	11637206	5335	2	179596	NM_001276934	-1387	WBGene00012100	sipa-1	SIPA (vertebrate Signal-Induced Proliferation-Associated) homolog
chrV	12021366	12021710	345	*	0	.	33.6264	-1	3.65715	172	Promoter	5	12021239	12023578	2340	1	179650	NM_073614	127	WBGene00008644	F10C2.3	hypothetical protein
chrV	12343660	12343821	162	*	0	.	98.1312	-1	3.65715	90	Promoter	5	12342481	12343467	987	2	179691	NM_073691	-193	WBGene00009092	tomm-20	Mitochondrial import receptor subunit TOM20 homolog
chrV	12728399	12728544	146	*	0	.	71.8505	-1	3.65715	78	Promoter	5	12728631	12729328	698	1	187809	NM_073778	-87	WBGene00011247	mrpl-49	Probable 39S ribosomal protein L49, mitochondrial
chrV	13497498	13497842	345	*	0	.	48.5725	-1	3.65715	172	Promoter	5	13497965	13498723	759	1	179833	NM_001269582	-123	WBGene00001808	gut-2	U6 snRNA-associated Sm-like protein LSm2
chrV	13962023	13962367	345	*	0	.	47.4537	-1	3.65715	172	Promoter	5	13962417	13963791	1375	1	179891	NM_074067	-50	WBGene00011194	R10D12.13	hypothetical protein
chrV	14355784	14356128	345	*	0	.	49.4286	-1	3.65715	172	Promoter	5	14356081	14356722	642	1	179936	NM_074160	0	WBGene00000877	cyn-1	Peptidyl-prolyl cis-trans isomerase 1
chrV	15085445	15085789	345	*	0	.	68.7869	-1	3.65715	172	Promoter	5	15085751	15086827	1077	1	180018	NM_074315	0	WBGene00007234	C01G10.7	hypothetical protein
chrV	15189712	15189835	124	*	0	.	70.2768	-1	3.65715	58	Promoter	5	15189952	15190833	882	1	180028	NM_074350	-117	WBGene00000879	cyn-3	Peptidyl-prolyl cis-trans isomerase 3
chrV	15511638	15511982	345	*	0	.	41.7861	-1	3.65715	172	Promoter	5	15512195	15512679	485	1	180044	NM_074459	-213	WBGene00004452	rpl-38	60S ribosomal protein L38
chrV	17921563	17921671	109	*	0	.	53.2611	-1	3.65715	47	Promoter	5	17921784	17924115	2332	1	183980	NM_075111	-113	WBGene00008442	E01B7.2	hypothetical protein
chrX	535814	536158	345	*	0	.	66.3725	-1	3.65715	172	Promoter	6	532286	535747	3462	2	180405	NM_075713	-67	WBGene00017898	F28C10.3	hypothetical protein
chrX	593291	593635	345	*	0	.	70.5452	-1	3.65715	172	Downstream (2-3kb)	6	593980	595787	1808	1	180410	NM_075723	-345	WBGene00017423	F13C5.2	hypothetical protein
chrX	768227	768338	112	*	0	.	96.5823	-1	3.65715	65	Promoter	6	767271	768065	795	2	180422	NM_075749	-162	WBGene00020216	trap-2	Translocon-associated protein subunit beta
chrX	949514	949678	165	*	0	.	142.933	-1	3.65715	104	Distal Intergenic	6	945268	948883	3616	2	180445	NM_075781	-631	WBGene00004893	sms-2	Phosphatidylcholine:ceramide cholinephosphotransferase 2
chrX	1060784	1060906	123	*	0	.	67.7695	-1	3.65715	51	Intron (NM_001129690/180458, intron 1 of 5)	6	1057831	1062443	4613	2	180458	NM_001129690	1537	WBGene00006741	unc-1	Protein unc-1
chrX	1064112	1064456	345	*	0	.	49.1771	-1	3.65715	172	Downstream (2-3kb)	6	1057831	1062443	4613	2	180458	NM_075801	-1669	WBGene00006741	unc-1	Protein unc-1
chrX	1103722	1104066	345	*	0	.	43.9295	-1	3.65715	172	Promoter	6	1104214	1106042	1829	1	180464	NM_075809	-148	WBGene00002062	ife-4	Eukaryotic translation initiation factor 4E-4
chrX	1120371	1120715	345	*	0	.	50.5992	-1	3.65715	172	Downstream (1-2kb)	6	1117347	1119397	2051	2	180465	NM_075812	-974	WBGene00015474	C05D9.7	hypothetical protein
chrX	1302310	1302654	345	*	0	.	37.3956	-1	3.65715	172	Distal Intergenic	6	1304585	1308124	3540	1	180473	NM_075838	-1931	WBGene00016871	inso-1	INSOmniac (Drosophila sleep affecting) homolog
chrX	2266427	2266771	345	*	0	.	41.297	-1	3.65715	172	Intron (NM_001047744/4363123, intron 1 of 7)	6	2263374	2267472	4099	2	4363123	NM_001047744	701	WBGene00044701	AH9.6	hypothetical protein
chrX	2452256	2452600	345	*	0	.	40.3532	-1	3.65715	172	Intron (NM_001330894/180549, intron 1 of 7)	6	2446075	2450495	4421	2	180549	NM_001330895	-1761	WBGene00001484	fox-1	Sex determination protein fox-1
chrX	2604637	2604981	345	*	0	.	46.7824	-1	3.65715	172	Exon (NM_001029702/180560, exon 10 of 12)	6	2608232	2609836	1605	1	188029	NM_076068	-3251	WBGene00020194	T03G6.1	hypothetical protein
chrX	3257122	3257466	345	*	0	.	45.7555	-1	3.65715	172	Promoter	6	3257406	3258063	658	1	180615	NM_001047784	0	WBGene00002255	lbp-3	Fatty acid-binding protein homolog 3
chrX	4457941	4458285	345	*	0	.	43.7963	-1	3.65715	172	Promoter	6	4458272	4459120	849	1	184091	NM_076366	0	WBGene00000157	aps-2	AP complex subunit sigma
chrX	5165063	5165407	345	*	0	.	69.9274	-1	3.65715	172	Promoter	6	5165411	5168514	3104	1	180787	NM_076476	-4	WBGene00020197	mans-3	alpha-1,2-Mannosidase
chrX	5244068	5244412	345	*	0	.	59.5489	-1	3.65715	172	Promoter	6	5244389	5246689	2301	1	180793	NM_076488	0	WBGene00021323	Y34B4A.7	hypothetical protein
chrX	5591828	5592172	345	*	0	.	46.2708	-1	3.65715	172	Downstream (2-3kb)	6	5593162	5594514	1353	1	180827	NM_076542	-990	WBGene00006826	unc-97	LIM domain-containing protein unc-97
chrX	6092075	6092243	169	*	0	.	117.408	-1	3.65715	109	Distal Intergenic	6	6089391	6091763	2373	2	180880	NM_076618	-312	WBGene00002007	hsp-3	Heat shock 70 kDa protein C
chrX	6690134	6690478	345	*	0	.	31.6424	-1	3.65715	172	Promoter	6	6684559	6690069	5511	2	185454	NM_076722	-65	WBGene00018175	F38B6.6	Transmembrane and TPR repeat-containing protein F38B6.6
chrX	6845895	6846239	345	*	0	.	59.15	-1	3.65715	172	Promoter	6	6846251	6847394	1144	1	183744	NM_076753	-12	WBGene00016893	C53B7.2	hypothetical protein
chrX	7264946	7265290	345	*	0	.	55.1384	-1	3.65715	172	Downstream (1-2kb)	6	7265665	7266934	1270	1	180989	NM_001029505	-375	WBGene00018518	F46H5.2	hypothetical protein
chrX	7501080	7501229	150	*	0	.	67.4484	-1	3.65715	80	Promoter	6	7495929	7500976	5048	2	181007	NM_076867	-104	WBGene00018604	uggt-1	UDP-Glucose Glycoprotein glucosylTransferase
chrX	7954380	7954724	345	*	0	.	35.1273	-1	3.65715	172	Promoter	6	7954375	7955703	1329	1	181053	NM_076939	5	WBGene00015776	dct-1	NIP3 homolog
chrX	8160056	8160400	345	*	0	.	48.9607	-1	3.65715	172	Downstream (1-2kb)	6	8159196	8159877	682	1	181073	NM_076974	860	WBGene00001854	hil-3	Histone H1.3
chrX	8368156	8368500	345	*	0	.	37.9433	-1	3.65715	172	Promoter	6	8368539	8371397	2859	1	181090	NM_077016	-39	WBGene00018226	F40B5.2	Putative metallophosphoesterase F40B5.2
chrX	8810949	8811293	345	*	0	.	43.2067	-1	3.65715	172	Promoter	6	8806919	8810932	4014	2	181128	NM_077091	-17	WBGene00019872	R04E5.9	hypothetical protein
chrX	9441537	9441881	345	*	0	.	37.4139	-1	3.65715	172	Promoter	6	9440398	9441564	1167	2	181891	NM_077185	0	WBGene00007128	memb-1	Golgi SNAP receptor complex member 2 homolog memb-1
chrX	10678195	10678539	345	*	0	.	43.7069	-1	3.65715	172	Distal Intergenic	6	10675998	10677101	1104	2	181265	NM_077386	-1094	WBGene00008745	F13E6.1	hypothetical protein
chrX	11522133	11522477	345	*	0	.	45.3893	-1	3.65715	172	Promoter	6	11522739	11533124	10386	1	181341	NM_077523	-262	WBGene00004746	sdc-2	Sex determination and dosage compensation protein sdc-2
chrX	12080514	12080858	345	*	0	.	32.7458	-1	3.65715	172	Promoter	6	12076807	12080222	3416	2	181377	NM_077618	-292	WBGene00012226	W03G11.4	hypothetical protein
chrX	13726829	13727173	345	*	0	.	44.2703	-1	3.65715	172	Promoter	6	13727302	13729795	2494	1	181490	NM_001270299	-129	WBGene00010776	pix-1	PIX (PAK (p21-activated kinase) Interacting eXchange factor) homolog
chrX	14312434	14312778	345	*	0	.	30.8698	-1	3.65715	172	Distal Intergenic	6	14308253	14311669	3417	2	181537	NM_077984	-765	WBGene00007529	C11H1.3	hypothetical protein
chrX	14327133	14327477	345	*	0	.	34.3323	-1	3.65715	172	Promoter	6	14327772	14330135	2364	1	182526	NM_077988	-295	WBGene00007531	C11H1.7	hypothetical protein
chrX	14602732	14603076	345	*	0	.	32.5932	-1	3.65715	172	Promoter	6	14603092	14608625	5534	1	181557	NM_001029299	-16	WBGene00001325	eor-2	hypothetical protein
chrX	14841143	14841305	163	*	0	.	89.8996	-1	3.65715	61	Distal Intergenic	6	14845944	14848494	2551	1	181580	NM_078061	-4639	WBGene00007772	egrh-1	EGR (Early Growth factor Response factor) Homolog
chrX	15606931	15607275	345	*	0	.	40.6885	-1	3.65715	172	Distal Intergenic	6	15605283	15606616	1334	2	181649	NM_078171	-315	WBGene00004276	rab-14	RAB family
chrX	15616441	15616785	345	*	0	.	46.2586	-1	3.65715	172	Promoter	6	15614419	15616514	2096	2	181652	NM_078174	0	WBGene00010725	erv-46	yeast ERV (ER to Golgi transport Vesicle protein) homolog
chrX	16612227	16612571	345	*	0	.	62.0521	-1	3.65715	172	Distal Intergenic	6	16613493	16616247	2755	1	181719	NM_078286	-922	WBGene00015547	ain-1	ALG-1 INteracting protein
chrX	16612428	16612772	345	*	0	.	46.2116	-1	3.65715	172	Distal Intergenic	6	16613493	16616247	2755	1	181719	NM_078286	-721	WBGene00015547	ain-1	ALG-1 INteracting protein
chrX	16681990	16682241	252	*	0	.	227.215	-1	3.65715	118	Distal Intergenic	6	16678488	16679797	1310	1	184872	NM_078293	3502	WBGene00017726	F22H10.2	hypothetical protein

## Sheet: F3U_up_N3UvF3U_intersect_MAB-5
seqnames	start	end	width	strand	score	name	thickStart	thickEnd	itemRgb	blockCount	annotation	geneChr	geneStart	geneEnd	geneLength	geneStrand	geneId	transcriptId	distanceToTSS	ENSEMBL	SYMBOL	GENENAME
chrI	35296	35640	345	*	0	.	33.021	-1	3.65715	172	Distal Intergenic	1	28280	32482	4203	2	171593	NM_058263	-2814	WBGene00022279	sesn-1	Sestrin homolog
chrI	288985	289329	345	*	0	.	48.9343	-1	3.65715	172	Promoter	1	286352	289035	2684	2	171617	NM_001306288	0	WBGene00016905	ztf-3	Zinc finger putative Transcription Factor family
chrI	295823	296167	345	*	0	.	33.0624	-1	3.65715	172	Exon (NM_058311/171618, exon 2 of 8)	1	295367	305080	9714	1	171618	NM_058312	456	WBGene00016902	C53D5.1	hypothetical protein
chrI	547920	548264	345	*	0	.	32.0018	-1	3.65715	172	Distal Intergenic	1	550708	556061	5354	1	191752	NM_058350	-2444	WBGene00004235	ptr-21	PaTched Related family
chrI	1481552	1481896	345	*	0	.	45.8586	-1	3.65715	172	Distal Intergenic	1	1483106	1490321	7216	1	171715	NM_058459	-1210	WBGene00001115	dyb-1	Dystrobrevin-1
chrI	1836881	1836967	87	*	0	.	41.8721	-1	3.65715	45	Intron (NM_170806/171751, intron 1 of 7)	1	1835936	1840888	4953	1	171751	NM_170806	945	WBGene00001196	egl-30	hypothetical protein
chrI	2291047	2291391	345	*	0	.	61.7807	-1	3.65715	172	Distal Intergenic	1	2281620	2289747	8128	2	171784	NM_058551	-1300	WBGene00000408	cdk-7	Cyclin-dependent kinase 7
chrI	2706215	2706389	175	*	0	.	99.0541	-1	3.65715	125	Distal Intergenic	1	2707629	2717345	9717	1	171832	NM_058627	-1240	WBGene00003006	lin-17	hypothetical protein
chrI	2708315	2708659	345	*	0	.	39.6703	-1	3.65715	172	Intron (NM_058627/171832, intron 2 of 8)	1	2707629	2717355	9727	1	171832	NM_001026642	686	WBGene00003006	lin-17	hypothetical protein
chrI	3516358	3516514	157	*	0	.	102.643	-1	3.65715	93	Promoter	1	3516552	3523250	6699	1	171920	NM_058772	-38	WBGene00021636	pcaf-1	P300/CBP Associated Factor homolog
chrI	3600751	3601095	345	*	0	.	30.9017	-1	3.65715	172	Promoter	1	3565243	3600677	35435	2	171926	NM_001313538	-74	WBGene00003060	lpd-3	LiPid Depleted
chrI	3721389	3721733	345	*	0	.	51.8968	-1	3.65715	172	Distal Intergenic	1	3713764	3721060	7297	2	266825	NM_058805	-329	WBGene00003040	lin-59	Probable histone-lysine N-methyltransferase lin-59
chrI	3721590	3721934	345	*	0	.	30.1122	-1	3.65715	172	Distal Intergenic	1	3713764	3721060	7297	2	266825	NM_058805	-530	WBGene00003040	lin-59	Probable histone-lysine N-methyltransferase lin-59
chrI	3740463	3740807	345	*	0	.	31.9828	-1	3.65715	172	Promoter	1	3734429	3740334	5906	2	171942	NM_058808	-129	WBGene00004147	larp-5	LARP (RNA binding La related protein) homolog
chrI	4218409	4218530	122	*	0	.	71.5438	-1	3.65715	49	Distal Intergenic	1	4214423	4215667	1245	2	172020	NM_058930	-2742	WBGene00015976	C18E3.9	hypothetical protein
chrI	4247410	4247754	345	*	0	.	37.3464	-1	3.65715	172	Promoter	1	4242938	4247580	4643	2	172023	NM_058936	0	WBGene00016606	exoc-7	Exocyst complex component 7
chrI	4881099	4881443	345	*	0	.	29.6729	-1	3.65715	172	Distal Intergenic	1	4884913	4895326	10414	1	172104	NM_059068	-3470	WBGene00017795	F25F8.1	hypothetical protein
chrI	4936287	4936631	345	*	0	.	33.2902	-1	3.65715	172	Intron (NM_001306369/3565539, intron 3 of 15)	1	4937770	4948941	11172	1	3565539	NM_001306375	-1139	WBGene00017885	dip-2	Disco-Interacting Protein 2 homolog
chrI	5311621	5311965	345	*	0	.	63.714	-1	3.65715	172	Promoter	1	5301768	5311609	9842	2	3565337	NM_001306396	-12	WBGene00002717	let-526	hypothetical protein
chrI	5313150	5313336	187	*	0	.	87.2961	-1	3.65715	124	Intron (NM_001276519/3565337, intron 2 of 11)	1	5301768	5313723	11956	2	3565337	NM_001276519	387	WBGene00002717	let-526	hypothetical protein
chrI	5353739	5354083	345	*	0	.	30.412	-1	3.65715	172	Promoter	1	5349781	5353767	3987	2	172182	NM_059173	0	WBGene00018866	nath-10	RNA cytidine acetyltransferase
chrI	5377622	5377966	345	*	0	.	35.8644	-1	3.65715	172	Promoter	1	5373409	5377365	3957	2	172187	NM_059180	-257	WBGene00004131	pqn-44	Prion-like-(Q/N-rich)-domain-bearing protein
chrI	5690013	5690357	345	*	0	.	53.9866	-1	3.65715	172	Intron (NM_059263/172233, intron 2 of 16)	1	5680366	5691440	11075	2	172233	NM_059263	1083	WBGene00006776	unc-40	hypothetical protein
chrI	5691610	5691954	345	*	0	.	49.9928	-1	3.65715	172	Promoter	1	5680366	5691440	11075	2	172233	NM_059263	-170	WBGene00006776	unc-40	hypothetical protein
chrI	5698975	5699319	345	*	0	.	44.925	-1	3.65715	172	Distal Intergenic	1	5702158	5705553	3396	1	266833	NM_059265	-2839	WBGene00020556	pamn-1	Probable peptidylglycine alpha-hydroxylating monooxygenase
chrI	6001005	6001349	345	*	0	.	31.6815	-1	3.65715	172	Promoter	1	5993301	6000774	7474	2	172275	NM_059333	-231	WBGene00006823	unc-94	Tropomodulin
chrI	6488947	6489291	345	*	0	.	38.5686	-1	3.65715	172	Promoter	1	6477115	6488918	11804	2	172355	NM_059464	-29	WBGene00019434	nmtn-1	NeMiTiN (neuronal enriched MAP interacting protein) homolog
chrI	6572729	6573073	345	*	0	.	41.7352	-1	3.65715	172	Distal Intergenic	1	6570089	6572430	2342	1	172376	NM_182051	2640	WBGene00019001	ipgm-1	2,3-bisphosphoglycerate-independent phosphoglycerate mutase
chrI	6579798	6580142	345	*	0	.	33.8907	-1	3.65715	172	Promoter	1	6580238	6584460	4223	1	266837	NM_059496	-96	WBGene00002783	let-607	hypothetical protein
chrI	6780102	6780446	345	*	0	.	30.5773	-1	3.65715	172	Promoter	1	6774516	6779906	5391	2	172398	NM_059539	-196	WBGene00004111	pqn-21	Prion-like-(Q/N-rich)-domain-bearing protein
chrI	7128142	7128486	345	*	0	.	45.03	-1	3.65715	172	Promoter	1	7123060	7128137	5078	2	172450	NM_059617	-5	WBGene00006753	unc-14	hypothetical protein
chrI	7129438	7129782	345	*	0	.	68.5919	-1	3.65715	172	Distal Intergenic	1	7123060	7128137	5078	2	172450	NM_059617	-1301	WBGene00006753	unc-14	hypothetical protein
chrI	7370092	7370436	345	*	0	.	72.51	-1	3.65715	172	Intron (NM_059682/184108, intron 1 of 10)	1	7360657	7371459	10803	2	184108	NM_059682	1023	WBGene00006306	sue-1	SUppressor of Elongation defect
chrI	7396904	7397248	345	*	0	.	36.992	-1	3.65715	172	Downstream (1-2kb)	1	7389106	7395883	6778	2	172493	NM_059687	-1021	WBGene00004944	sol-1	Suppressor of lurcher protein 1
chrI	7435806	7436150	345	*	0	.	38.8658	-1	3.65715	172	Intron (NM_001026700/172497, intron 13 of 28)	1	7433417	7453729	20313	1	172497	NM_001330930	2389	WBGene00006752	unc-13	Phorbol ester/diacylglycerol-binding protein unc-13
chrI	7491885	7492229	345	*	0	.	72.4594	-1	3.65715	172	Promoter	1	7492364	7492731	368	1	172503	NM_059701	-135	WBGene00012140	T28F4.5	hypothetical protein
chrI	7563060	7563404	345	*	0	.	34.3754	-1	3.65715	172	Distal Intergenic	1	7564586	7567384	2799	1	172509	NM_059714	-1182	WBGene00012031	T25G3.4	Probable glycerol-3-phosphate dehydrogenase, mitochondrial
chrI	7595482	7595826	345	*	0	.	31.5227	-1	3.65715	172	Distal Intergenic	1	7596526	7601903	5378	1	172518	NM_001263616	-700	WBGene00008419	wdr-23	DDB1-and CUL4-associated factor 11 homolog
chrI	7872165	7872509	345	*	0	.	45.0543	-1	3.65715	172	Exon (NM_059776/172557, exon 9 of 10)	1	7870027	7871883	1857	1	172556	NM_001026418	2138	WBGene00011232	pck-2	Phosphoenolypyruvate CarboxyKinase
chrI	8133651	8133995	345	*	0	.	89.0819	-1	3.65715	172	Promoter	1	8134144	8134735	592	1	172599	NM_059828	-149	WBGene00012113	T28B8.1	hypothetical protein
chrI	8747925	8748269	345	*	0	.	39.9634	-1	3.65715	172	Downstream (1-2kb)	1	8743849	8746925	3077	2	183252	NM_059965	-1000	WBGene00007976	C36B1.9	hypothetical protein
chrI	8786813	8787035	223	*	0	.	146.33	-1	3.65715	120	Distal Intergenic	1	8780265	8785386	5122	2	183975	NM_059975	-1427	WBGene00008439	mfb-1	MAFBx (F-box) protein homolog
chrI	8935001	8935345	345	*	0	.	44.4775	-1	3.65715	172	Exon (NM_182084/172706, exon 2 of 10)	1	8931163	8937553	6391	2	172706	NM_182084	2208	WBGene00009958	madd-4	Protein madd-4
chrI	8938628	8938972	345	*	0	.	63.886	-1	3.65715	172	Intron (NM_001264004/172706, intron 7 of 15)	1	8931163	8937553	6391	2	172706	NM_182084	-1075	WBGene00009958	madd-4	Protein madd-4
chrI	9013959	9014303	345	*	0	.	30.7962	-1	3.65715	172	Promoter	1	9009260	9013858	4599	2	172720	NM_001037887	-101	WBGene00009477	rbpl-1	Retinoblastoma Binding Protein Like
chrI	9141604	9141948	345	*	0	.	40.6016	-1	3.65715	172	Promoter	1	9138812	9141520	2709	2	172739	NM_060050	-84	WBGene00014119	ZK858.6	Transmembrane 9 superfamily member
chrI	9343805	9344149	345	*	0	.	51.0801	-1	3.65715	172	Downstream (<1kb)	1	9335965	9341897	5933	2	172760	NM_001025828	-1908	WBGene00003026	lin-41	Protein lin-41
chrI	9437868	9438212	345	*	0	.	42.6342	-1	3.65715	172	Intron (NM_060106/172770, intron 3 of 5)	1	9438526	9440765	2240	1	172770	NM_001136281	-314	WBGene00007647	C17E4.10	hypothetical protein
chrI	9665131	9665250	120	*	0	.	72.5571	-1	3.65715	67	Promoter	1	9665311	9668436	3126	1	172814	NM_001025808	-61	WBGene00000466	cel-1	mRNA guanylyltransferase
chrI	9869124	9869468	345	*	0	.	42.9241	-1	3.65715	172	Promoter	1	9869718	9874124	4407	1	172839	NM_181998	-250	WBGene00003639	nhr-49	Nuclear hormone receptor family member nhr-49
chrI	9984920	9985264	345	*	0	.	29.9516	-1	3.65715	172	Promoter	1	9982656	9984786	2131	2	172859	NM_060239	-134	WBGene00006379	sys-1	SYmmetrical Sister cell hermaphrodite gonad defect
chrI	11135668	11136012	345	*	0	.	38.939	-1	3.65715	172	Distal Intergenic	1	11076372	11134559	58188	2	173007	NM_001026479	-1109	WBGene00001980	hmr-1	Cadherin-related hmr-1
chrI	12575578	12575922	345	*	0	.	32.8293	-1	3.65715	172	Downstream (2-3kb)	1	12568973	12572796	3824	2	173128	NM_001026274	-2782	WBGene00001008	dlk-1	Mitogen-activated protein kinase kinase kinase dlk-1
chrI	13040523	13040867	345	*	0	.	53.788	-1	3.65715	172	Intron (NM_001265120/173177, intron 2 of 3)	1	13039592	13045117	5526	1	173177	NM_001265122	931	WBGene00012274	W05B5.1	hypothetical protein
chrI	14113139	14113483	345	*	0	.	33.8485	-1	3.65715	172	Promoter	1	14107814	14113091	5278	2	173278	NM_061063	-48	WBGene00001047	dnj-29	DNaJ domain (prokaryotic heat shock protein)
chrI	14809303	14809647	345	*	0	.	40.9954	-1	3.65715	172	Intron (NM_061182/173351, intron 1 of 6)	1	14807480	14815330	7851	1	173351	NM_061181	1823	WBGene00004889	smp-1	Semaphorin-1A
chrI	15022948	15023292	345	*	0	.	36.6535	-1	3.65715	172	Promoter	1	15017473	15022980	5508	2	173370	NM_061217	0	WBGene00001049	dog-1	Deletions Of G-rich DNA
chrII	255250	255449	200	*	0	.	149.333	-1	3.65715	94	Promoter	2	241114	255182	14069	2	173410	NM_061286	-68	WBGene00004166	pqn-85	Nipped-B protein;Nipped-B-like protein pqn-85
chrII	4089284	4089628	345	*	0	.	32.028	-1	3.65715	172	Distal Intergenic	2	4092011	4094081	2071	1	173747	NM_062320	-2383	WBGene00020007	R11F4.1	Probable glycerol kinase
chrII	4791279	4791623	345	*	0	.	44.671	-1	3.65715	172	Promoter	2	4791622	4795510	3889	1	173826	NM_062458	0	WBGene00017837	F26G1.1	hypothetical protein
chrII	4999247	4999404	158	*	0	.	84.0606	-1	3.65715	65	Promoter	2	4999524	5003641	4118	1	173864	NM_062520	-120	WBGene00019087	F59A6.5	hypothetical protein
chrII	5055295	5055463	169	*	0	.	95.2195	-1	3.65715	54	Promoter	2	5054261	5055155	895	2	173872	NM_062530	-140	WBGene00002068	ify-1	Securin-like protein
chrII	5660967	5661311	345	*	0	.	38.2446	-1	3.65715	172	Promoter	2	5661194	5664370	3177	1	173960	NM_170997	0	WBGene00016115	mdt-26	MeDiaTor
chrII	5661713	5662057	345	*	0	.	64.2226	-1	3.65715	172	Exon (NM_170997/173960, exon 2 of 8)	2	5661194	5664372	3179	1	173960	NR_151553	519	WBGene00016115	mdt-26	MeDiaTor
chrII	5871537	5871881	345	*	0	.	60.0403	-1	3.65715	172	Promoter	2	5867673	5871951	4279	2	173997	NM_062771	70	WBGene00018872	F55C12.5	hypothetical protein
chrII	6782636	6782980	345	*	0	.	30.6417	-1	3.65715	172	Distal Intergenic	2	6783469	6787696	4228	1	174116	NM_062986	-489	WBGene00020481	T13C2.6	hypothetical protein
chrII	6888269	6888613	345	*	0	.	30.238	-1	3.65715	172	Downstream (<1kb)	2	6884117	6887706	3590	2	174127	NM_063007	-563	WBGene00004059	pmp-2	Peroxisomal Membrane Protein related
chrII	6941886	6942230	345	*	0	.	31.2948	-1	3.65715	172	Intron (NM_001026935/174134, intron 11 of 16)	2	6940753	6946946	6194	1	174134	NM_001306552	1133	WBGene00017699	flcn-1	FoLliCuliN
chrII	7059412	7059756	345	*	0	.	30.1729	-1	3.65715	172	Distal Intergenic	2	7056316	7057943	1628	2	174155	NM_063048	-1469	WBGene00022856	cth-2	Putative cystathionine gamma-lyase 2
chrII	7301724	7302068	345	*	0	.	37.0802	-1	3.65715	172	Promoter	2	7302111	7305530	3420	1	174198	NM_063124	-43	WBGene00000839	cul-4	Cullin-4
chrII	7642160	7642504	345	*	0	.	54.7044	-1	3.65715	172	Promoter	2	7641596	7642072	477	2	174235	NM_182147	-88	WBGene00020114	pde-4	Phosphodiesterase;Probable 3',5'-cyclic phosphodiesterase pde-4
chrII	7643300	7643644	345	*	0	.	29.749	-1	3.65715	172	Promoter	2	7628064	7643028	14965	2	174235	NM_182144	-272	WBGene00020114	pde-4	Phosphodiesterase;Probable 3',5'-cyclic phosphodiesterase pde-4
chrII	7818247	7818591	345	*	0	.	30.4085	-1	3.65715	172	Exon (NM_001027138/174261, exon 5 of 5)	2	7816708	7819872	3165	1	174261	NM_001306629	1539	WBGene00000517	cki-2	CKI family (Cyclin-dependent Kinase Inhibitor)
chrII	8071861	8072205	345	*	0	.	43.2884	-1	3.65715	172	Intron (NM_001027150/174296, intron 1 of 7)	2	8068233	8073372	5140	2	174296	NM_001027150	1167	WBGene00011511	gpcp-2	Putative glycerophosphocholine phosphodiesterase GPCPD1 homolog 2
chrII	8316729	8317073	345	*	0	.	39.9117	-1	3.65715	172	Intron (NM_001026918/174331, intron 3 of 11)	2	8308014	8317749	9736	2	174331	NM_182140	676	WBGene00008819	shw-1	SHaW family of potassium channels
chrII	9242853	9243197	345	*	0	.	37.7112	-1	3.65715	172	Promoter	2	9243309	9248695	5387	1	259455	NM_063568	-112	WBGene00012033	T26C5.3	hypothetical protein
chrII	9274019	9274363	345	*	0	.	73.9836	-1	3.65715	172	Downstream (1-2kb)	2	9271726	9273024	1299	2	182077	NM_063575	-995	WBGene00007226	C01G6.4	hypothetical protein
chrII	9282733	9283077	345	*	0	.	54.3655	-1	3.65715	172	Distal Intergenic	2	9275785	9280040	4256	2	174470	NM_063576	-2693	WBGene00007227	C01G6.5	hypothetical protein
chrII	9603455	9603799	345	*	0	.	66.3471	-1	3.65715	172	Intron (NM_063665/174512, intron 1 of 9)	2	9598475	9605242	6768	2	174512	NM_063665	1443	WBGene00003618	nhr-19	Nuclear hormone receptor family member nhr-19
chrII	9974990	9975334	345	*	0	.	48.7953	-1	3.65715	172	Promoter	2	9971554	9974704	3151	2	174556	NM_063754	-286	WBGene00011276	aakg-5	AMP-Activated protein Kinase Gamma subunit
chrII	10548937	10549025	89	*	0	.	71.8445	-1	3.65715	31	Promoter	2	10544357	10548696	4340	2	174623	NM_063871	-241	WBGene00011304	mnk-1	MAP kinase-interacting serine/threonine-protein kinase mnk-1
chrII	10548998	10549342	345	*	0	.	43.7629	-1	3.65715	172	Intron (NM_182124/174623, intron 1 of 6)	2	10544357	10548696	4340	2	174623	NM_063871	-302	WBGene00011304	mnk-1	MAP kinase-interacting serine/threonine-protein kinase mnk-1
chrII	10551950	10552294	345	*	0	.	57.3095	-1	3.65715	172	Intron (NM_182124/174623, intron 1 of 6)	2	10544357	10553622	9266	2	174623	NM_182124	1328	WBGene00011304	mnk-1	MAP kinase-interacting serine/threonine-protein kinase mnk-1
chrII	10774728	10775072	345	*	0	.	29.7496	-1	3.65715	172	Promoter	2	10739275	10775061	35787	2	174657	NM_001129126	0	WBGene00003404	mpz-1	Multiple PDZ domain protein
chrII	11724513	11724857	345	*	0	.	33.7441	-1	3.65715	172	Downstream (1-2kb)	2	11725323	11726431	1109	1	174798	NM_001356894	-466	WBGene00002262	ldh-1	L-lactate dehydrogenase
chrII	11980247	11980391	145	*	0	.	70.0284	-1	3.65715	74	Promoter	2	11980475	11988450	7976	1	174838	NM_001330961	-84	WBGene00012458	ash-2	Set1/Ash2 histone methyltransferase complex subunit ash-2
chrII	13908614	13908958	345	*	0	.	42.3362	-1	3.65715	172	Promoter	2	13908925	13915119	6195	1	175043	NM_064513	0	WBGene00012198	W02B8.2	hypothetical protein
chrII	14598442	14598786	345	*	0	.	34.1051	-1	3.65715	172	Distal Intergenic	2	14600909	14610412	9504	1	3565050	NM_064634	-2123	WBGene00006603	tps-2	Alpha,alpha-trehalose-phosphate synthase [UDP-forming] 2
chrIII	598195	598539	345	*	0	.	35.555	-1	3.65715	172	Promoter	3	591349	598105	6757	2	175211	NM_001027744	-90	WBGene00021906	Y55B1AR.2	hypothetical protein
chrIII	783297	783641	345	*	0	.	39.5604	-1	3.65715	172	Promoter	3	778682	783295	4614	2	3565075	NM_171860	-2	WBGene00018364	dagl-2	DiAcylGlycerol Lipase homolog
chrIII	3456351	3456498	148	*	0	.	110.587	-1	3.65715	93	Promoter	3	3456600	3460045	3446	1	175448	NM_065311	-102	WBGene00007921	C34C12.2	hypothetical protein
chrIII	3801458	3801600	143	*	0	.	95.3644	-1	3.65715	76	Downstream (<1kb)	3	3790825	3800037	9213	2	175490	NM_001027623	-1421	WBGene00003476	mtm-3	Myotubularin-related protein 3
chrIII	3968229	3968573	345	*	0	.	30.1556	-1	3.65715	172	Intron (NM_065398/175514, intron 3 of 6)	3	3965696	3972715	7020	2	175514	NM_065398	4142	WBGene00003423	msi-1	MuSashI (fly neural) family
chrIII	4193632	4193976	345	*	0	.	46.8413	-1	3.65715	172	Promoter	3	4193983	4194950	968	1	175541	NM_001083177	-7	WBGene00006959	xbp-1	X-box Binding Protein homolog
chrIII	4560524	4560868	345	*	0	.	61.3065	-1	3.65715	172	Distal Intergenic	3	4562753	4565879	3127	1	175596	NM_065524	-1885	WBGene00003915	pan-1	P-granule-associated novel protein 1
chrIII	4562149	4562493	345	*	0	.	33.1125	-1	3.65715	172	Promoter	3	4562753	4565879	3127	1	175596	NM_065524	-260	WBGene00003915	pan-1	P-granule-associated novel protein 1
chrIII	5920011	5920355	345	*	0	.	34.2644	-1	3.65715	172	Promoter	3	5917710	5919951	2242	2	175836	NR_136366	-60	WBGene00016201	tdo-2	Tryptophan 2,3-dioxygenase
chrIII	5999732	6000076	345	*	0	.	39.032	-1	3.65715	172	Intron (NM_171143/175849, intron 9 of 14)	3	6002719	6005755	3037	1	175849	NM_001306709	-2643	WBGene00020209	T04C9.1	hypothetical protein
chrIII	6170083	6170427	345	*	0	.	34.5713	-1	3.65715	172	Intron (NM_001027403/259512, intron 3 of 4)	3	6165289	6168530	3242	2	175871	NM_001027402	-1553	WBGene00001160	efk-1	Eukaryotic elongation factor 2 kinase
chrIII	6897565	6897909	345	*	0	.	34.4735	-1	3.65715	172	Promoter	3	6898040	6900404	2365	1	175961	NM_066100	-131	WBGene00020315	T07E3.4	hypothetical protein
chrIII	6988037	6988381	345	*	0	.	47.0154	-1	3.65715	172	Distal Intergenic	3	6990356	7002175	11820	1	175980	NM_001276777	-1975	WBGene00004182	prk-1	Pim (mammalian oncogene) Related Kinase
chrIII	7153851	7154195	345	*	0	.	51.7639	-1	3.65715	172	Promoter	3	7146469	7153770	7302	2	176000	NM_001047395	-81	WBGene00003858	ogt-1	UDP-N-acetylglucosamine--peptide N-acetylglucosaminyltransferase
chrIII	7155655	7155999	345	*	0	.	75.5266	-1	3.65715	172	Downstream (<1kb)	3	7146469	7153770	7302	2	176000	NM_001047395	-1885	WBGene00003858	ogt-1	UDP-N-acetylglucosamine--peptide N-acetylglucosaminyltransferase
chrIII	7335288	7335632	345	*	0	.	38.4727	-1	3.65715	172	Promoter	3	7330225	7335117	4893	2	176040	NM_171882	-171	WBGene00018953	F56C9.10	hypothetical protein
chrIII	7498410	7498754	345	*	0	.	38.6278	-1	3.65715	172	Downstream (<1kb)	3	7498833	7499338	506	2	176062	NM_066246	584	WBGene00015582	C07H6.9	hypothetical protein
chrIII	7499489	7499833	345	*	0	.	37.5834	-1	3.65715	172	Promoter	3	7499762	7503175	3414	1	176063	NM_066247	0	WBGene00015581	C07H6.4	hypothetical protein
chrIII	7710077	7710421	345	*	0	.	42.396	-1	3.65715	172	Distal Intergenic	3	7700625	7709472	8848	2	176083	NM_066277	-605	WBGene00003002	lin-13	Zinc finger protein lin-13
chrIII	8124405	8124749	345	*	0	.	36.9208	-1	3.65715	172	Distal Intergenic	3	8111617	8120805	9189	2	176145	NM_171207	-3600	WBGene00001565	gei-8	Nuclear receptor corepressor 1
chrIII	8356455	8356799	345	*	0	.	41.428	-1	3.65715	172	Downstream (<1kb)	3	8352055	8355095	3041	2	176179	NM_066441	-1360	WBGene00006840	unc-116	Kinesin heavy chain
chrIII	8358227	8358571	345	*	0	.	51.1942	-1	3.65715	172	Promoter	3	8356987	8358264	1278	2	187602	NM_066442	0	WBGene00019881	R05D3.8	Putative RNA-binding protein R05D3.8
chrIII	8802046	8802390	345	*	0	.	39.4958	-1	3.65715	172	Intron (NR_136383/176237, intron 10 of 14)	3	8802954	8805625	2672	1	176237	NM_001027440	-564	WBGene00006975	zfp-1	Zinc Finger Protein
chrIII	9703832	9704176	345	*	0	.	54.0525	-1	3.65715	172	Intron (NM_066744/176369, intron 1 of 7)	3	9704942	9709398	4457	1	176369	NM_001047379	-766	WBGene00006579	tlk-1	Serine/threonine-protein kinase tousled-like 1
chrIII	10363494	10363838	345	*	0	.	52.792	-1	3.65715	172	Distal Intergenic	3	10365066	10373054	7989	1	176454	NM_001268143	-1228	WBGene00008018	tbc-8	TBC (Tre-2/Bub2/Cdc16) domain family
chrIII	10882018	10882362	345	*	0	.	40.0863	-1	3.65715	172	Promoter	3	10882370	10893575	11206	1	176517	NM_066996	-8	WBGene00008081	athp-1	AT Hook plus PHD finger transcription factor
chrIII	11921652	11921996	345	*	0	.	30.9672	-1	3.65715	172	Promoter	3	11921697	11923687	1991	1	176627	NM_067154	0	WBGene00013239	Y56A3A.22	hypothetical protein
chrIII	12273626	12273970	345	*	0	.	43.8109	-1	3.65715	172	Promoter	3	12251697	12273680	21984	2	176653	NM_067195	0	WBGene00013557	Y75B8A.24	hypothetical protein
chrIII	13068182	13068526	345	*	0	.	37.5223	-1	3.65715	172	Distal Intergenic	3	13071009	13073554	2546	1	176728	NM_001276802	-2483	WBGene00012717	Y39E4B.6	hypothetical protein
chrIII	13070613	13070777	165	*	0	.	88.5187	-1	3.65715	65	Promoter	3	13071009	13073554	2546	1	176728	NM_001276802	-232	WBGene00012717	Y39E4B.6	hypothetical protein
chrIII	13466339	13466498	160	*	0	.	89.5679	-1	3.65715	65	Promoter	3	13464818	13466295	1478	2	176774	NM_067382	-44	WBGene00000407	cdk-5	Cyclin-dependent-like kinase 5
chrIV	192213	192304	92	*	0	.	56.8715	-1	3.65715	11	Promoter	4	192482	193907	1426	1	259547	NM_001307378	-178	WBGene00021402	Y38C1AA.12	hypothetical protein
chrIV	1595920	1596090	171	*	0	.	91.3173	-1	3.65715	92	Promoter	4	1590894	1595805	4912	2	176966	NM_067703	-115	WBGene00003794	npp-8	Nuclear Pore complex Protein
chrIV	1857970	1858314	345	*	0	.	43.0818	-1	3.65715	172	Promoter	4	1858557	1879939	21383	1	176991	NM_171279	-243	WBGene00001173	egl-4	cGMP-dependent protein kinase;cGMP-dependent protein kinase egl-4;hypothetical protein
chrIV	2993290	2993634	345	*	0	.	45.2574	-1	3.65715	172	Intron (NM_001028328/177079, intron 2 of 8)	4	2986719	2992468	5750	2	177079	NM_001028329	-822	WBGene00021890	Y54G2A.26	hypothetical protein
chrIV	3050522	3050866	345	*	0	.	159.742	-1	3.65715	172	Distal Intergenic	4	3033193	3049971	16779	2	177084	NM_067883	-551	WBGene00022069	eel-1	Enhancer of EfL-1 mutant phenotype
chrIV	4445825	4445988	164	*	0	.	79.67	-1	3.65715	91	Promoter	4	4443408	4445740	2333	2	177211	NM_068167	-85	WBGene00019953	wapl-1	Wings apart-like protein homolog 1
chrIV	4477126	4477470	345	*	0	.	45.1021	-1	3.65715	172	Promoter	4	4468918	4477058	8141	2	177215	NM_068174	-68	WBGene00019719	M01H9.3	hypothetical protein
chrIV	7022950	7023294	345	*	0	.	56.7838	-1	3.65715	172	Distal Intergenic	4	7024243	7028001	3759	1	177469	NM_068686	-949	WBGene00015551	C06G3.5	hypothetical protein
chrIV	7723588	7723932	345	*	0	.	43.1629	-1	3.65715	172	Distal Intergenic	4	7720633	7723197	2565	2	177553	NM_068861	-391	WBGene00016846	C50F7.6	hypothetical protein
chrIV	7789483	7789827	345	*	0	.	30.3618	-1	3.65715	172	Promoter	4	7786198	7789489	3292	2	177565	NM_001313020	0	WBGene00016378	imp-3	IntraMembrane Protease (IMPAS) family
chrIV	8375438	8375782	345	*	0	.	37.5765	-1	3.65715	172	Exon (NM_001307123/177635, exon 2 of 2)	4	8375733	8376432	700	2	177635	NM_001307123	650	WBGene00017074	D2096.7	hypothetical protein
chrIV	8431608	8431952	345	*	0	.	43.961	-1	3.65715	172	Promoter	4	8429420	8431490	2071	2	177643	NM_069034	-118	WBGene00020827	T26A8.4	hypothetical protein
chrIV	8432002	8432346	345	*	0	.	39.3224	-1	3.65715	172	Distal Intergenic	4	8429420	8431490	2071	2	177643	NM_069034	-512	WBGene00020827	T26A8.4	hypothetical protein
chrIV	8432778	8433122	345	*	0	.	71.6666	-1	3.65715	172	Promoter	4	8433142	8437571	4430	1	177644	NM_069035	-20	WBGene00020824	T26A8.1	hypothetical protein
chrIV	8620111	8620455	345	*	0	.	32.1339	-1	3.65715	172	Distal Intergenic	4	8620762	8625655	4894	1	177666	NM_069074	-307	WBGene00003034	lin-49	Protein lin-49
chrIV	8795076	8795420	345	*	0	.	37.4806	-1	3.65715	172	Downstream (1-2kb)	4	8791345	8792890	1546	2	177691	NM_001027871	-2186	WBGene00007898	C33D9.3	hypothetical protein
chrIV	8864724	8865068	345	*	0	.	45.2899	-1	3.65715	172	Promoter	4	8862425	8865046	2622	2	177702	NM_001276828	0	WBGene00007492	C09G9.1	hypothetical protein
chrIV	9216497	9216841	345	*	0	.	35.7072	-1	3.65715	172	Distal Intergenic	4	9217754	9220173	2420	1	177744	NM_069203	-913	WBGene00008110	C46C2.2	hypothetical protein
chrIV	9706760	9707104	345	*	0	.	34.2533	-1	3.65715	172	Promoter	4	9697256	9706718	9463	2	177804	NM_069324	-42	WBGene00014243	dcaf-1	DDB1-and CUL4-associated factor homolog 1
chrIV	9995004	9995348	345	*	0	.	32.2213	-1	3.65715	172	Promoter	4	9989932	9994923	4992	2	177855	NM_001268520	-81	WBGene00006699	uba-1	UBA (human ubiquitin) related
chrIV	10172001	10172087	87	*	0	.	38.6491	-1	3.65715	84	Intron (NM_001028218/177894, intron 3 of 15)	4	10165839	10170847	5009	2	177894	NM_001268539	-1154	WBGene00004254	pxf-1	Rap guanine nucleotide exchange factor
chrIV	10342457	10342615	159	*	0	.	75.8014	-1	3.65715	90	Intron (NM_001268551/177921, intron 2 of 18)	4	10338698	10340168	1471	2	177921	NM_001028123	-2289	WBGene00006779	unc-43	Calcium/calmodulin-dependent protein kinase type II
chrIV	11119215	11119301	87	*	0	.	90.312	-1	3.65715	45	Promoter	4	11119451	11122938	3488	1	178014	NM_001268607	-150	WBGene00011480	enpl-1	Endoplasmin homolog
chrIV	11486832	11487176	345	*	0	.	37.5481	-1	3.65715	172	Intron (NM_069768/178072, intron 1 of 5)	4	11483229	11486110	2882	2	178072	NM_001268630	-722	WBGene00004892	sms-1	Phosphatidylcholine:ceramide cholinephosphotransferase 1
chrIV	12404118	12404462	345	*	0	.	34.7246	-1	3.65715	172	Promoter	4	12404435	12408440	4006	1	178191	NM_069967	0	WBGene00001580	gex-3	Membrane-associated protein gex-3
chrIV	13272522	13272866	345	*	0	.	38.704	-1	3.65715	172	Promoter	4	13267128	13272511	5384	2	178284	NM_001129313	-11	WBGene00006763	unc-26	Synaptojanin
chrIV	16995513	16995857	345	*	0	.	31.5694	-1	3.65715	172	Promoter	4	16995822	17014586	18765	1	3565076	NM_001047548	0	WBGene00004403	rom-4	Rhomboid-like protein
chrIV	17268643	17268987	345	*	0	.	50.4595	-1	3.65715	172	Distal Intergenic	4	17269343	17272059	2717	1	178504	NM_070663	-356	WBGene00000224	atgp-1	Amino acid Transporter GlycoProtein subunit
chrV	4450563	4450907	345	*	0	.	31.9449	-1	3.65715	172	Promoter	5	4443523	4450549	7027	2	178842	NM_001269112	-14	WBGene00021626	rft-2	Riboflavin transporter rft-2
chrV	4731421	4731765	345	*	0	.	58.2278	-1	3.65715	172	Promoter	5	4731911	4734430	2520	1	178865	NM_001322552	-146	WBGene00018208	F39G3.3	hypothetical protein
chrV	5110728	5111072	345	*	0	.	37.0513	-1	3.65715	172	Promoter	5	5108195	5110766	2572	2	182223	NM_071968	0	WBGene00015449	ugt-63	UDP-GlucuronosylTransferase
chrV	6785132	6785476	345	*	0	.	61.1344	-1	3.65715	172	Promoter	5	6785491	6785917	427	1	179071	NM_072318	-15	WBGene00004975	spe-39	Spermatogenesis-defective protein 39
chrV	8437539	8437659	121	*	0	.	60.6647	-1	3.65715	35	Intron (NM_072772/179225, intron 1 of 15)	5	8416178	8438409	22232	2	179225	NM_072772	750	WBGene00018700	lmd-3	LysM Domain (peptidoglycan binding) protein
chrV	8949396	8949740	345	*	0	.	32.1093	-1	3.65715	172	Promoter	5	8949658	8955414	5757	1	179274	NM_001028970	0	WBGene00001526	gck-1	Germinal center kinase 1
chrV	10858389	10858733	345	*	0	.	71.3761	-1	3.65715	172	Intron (NM_001307768/179505, intron 1 of 7)	5	10852883	10859781	6899	2	179505	NM_001307768	1048	WBGene00010012	saeg-1	Suppressor of activated egl-4 protein 1
chrV	10871402	10871746	345	*	0	.	32.169	-1	3.65715	172	Distal Intergenic	5	10852883	10865699	12817	2	179505	NM_073368	-5703	WBGene00010012	saeg-1	Suppressor of activated egl-4 protein 1
chrV	11535532	11535876	345	*	0	.	33.9211	-1	3.65715	172	Intron (NM_073525/179584, intron 2 of 8)	5	11532773	11540184	7412	1	179584	NM_073526	2759	WBGene00009532	ccch-1	CCCH-type zinc finger putative transcription factor
chrV	11610479	11610823	345	*	0	.	45.6401	-1	3.65715	172	Promoter	5	11610779	11612475	1697	1	179592	NM_001269409	0	WBGene00009385	sas-5	Spindle assembly abnormal protein 5
chrV	13041663	13042007	345	*	0	.	64.9284	-1	3.65715	172	Promoter	5	13038756	13041721	2966	2	179789	NM_073858	0	WBGene00012337	W07G4.3	hypothetical protein
chrV	13176358	13176702	345	*	0	.	36.6086	-1	3.65715	172	Promoter	5	13176711	13179956	3246	1	179800	NM_073876	-9	WBGene00001874	him-17	High Incidence of Males (increased X chromosome loss)
chrV	13313073	13313417	345	*	0	.	44.6605	-1	3.65715	172	Promoter	5	13313598	13315487	1890	1	179811	NM_001269569	-181	WBGene00008219	C50B6.3	hypothetical protein
chrV	13468231	13468575	345	*	0	.	46.2803	-1	3.65715	172	Promoter	5	13467181	13468268	1088	2	179829	NM_073940	0	WBGene00009138	F25H9.6	hypothetical protein
chrV	13789407	13789751	345	*	0	.	57.1875	-1	3.65715	172	Promoter	5	13789887	13795919	6033	1	179874	NM_001047656	-136	WBGene00009975	F53C11.5	hypothetical protein
chrV	13790545	13790889	345	*	0	.	48.2347	-1	3.65715	172	Promoter	5	13791025	13795919	4895	1	179874	NM_001047657	-136	WBGene00009975	F53C11.5	hypothetical protein
chrV	14143635	14143979	345	*	0	.	53.3625	-1	3.65715	172	Intron (NM_001356754/179912, intron 1 of 11)	5	14117600	14145367	27768	2	179912	NM_001356754	1388	WBGene00003916	par-1	Serine/threonine-protein kinase par-1
chrV	14193424	14193768	345	*	0	.	36.0091	-1	3.65715	172	Distal Intergenic	5	14194483	14197421	2939	1	179922	NM_001029131	-715	WBGene00013878	atfs-1	Stress activated transcription factor atfs-1
chrV	14801826	14802170	345	*	0	.	31.8059	-1	3.65715	172	Exon (NM_001269692/3565509, exon 4 of 17)	5	14784641	14800818	16178	2	3565509	NM_001129409	-1008	WBGene00008183	rin-1	RIN (Ras/Rab INteractor) homolog
chrV	15766302	15766461	160	*	0	.	93.8369	-1	3.65715	98	Promoter	5	15766575	15767185	611	1	180057	NM_074527	-114	WBGene00010184	F57A10.2	Major sperm protein
chrV	16814726	16815070	345	*	0	.	40.857	-1	3.65715	172	Distal Intergenic	5	16815577	16820572	4996	1	180126	NM_074844	-507	WBGene00011850	T20B3.1	hypothetical protein
chrV	18967731	18967928	198	*	0	.	107.479	-1	3.65715	109	Promoter	5	18961101	18967787	6687	2	180238	NM_171562	0	WBGene00012701	Y39B6A.43	hypothetical protein
chrV	19522831	19523087	257	*	0	.	179.516	-1	3.65715	155	Promoter	5	19520168	19522767	2600	2	180278	NM_075396	-64	WBGene00012813	Y43F8B.2	hypothetical protein
chrV	19529341	19529427	87	*	0	.	71.2291	-1	3.65715	19	Intron (NM_001269946/180278, intron 3 of 5)	5	19520168	19531987	11820	2	180278	NM_001269946	2560	WBGene00012813	Y43F8B.2	hypothetical protein
chrV	19620119	19620463	345	*	0	.	30.3251	-1	3.65715	172	Intron (NR_052929/13192190, intron 2 of 0)	5	19615069	19622346	7278	2	180282	NM_075402	1883	WBGene00012825	Y43F8C.3	hypothetical protein
chrV	19622567	19622911	345	*	0	.	34.72	-1	3.65715	172	Promoter	5	19615069	19622346	7278	2	180282	NM_075402	-221	WBGene00012825	Y43F8C.3	hypothetical protein
chrX	410024	410368	345	*	0	.	77.6141	-1	3.65715	172	Intron (NM_001351873/180396, intron 25 of 31)	6	406490	408077	1588	2	180396	NM_001351874	-1947	NA	ZK1193.2	hypothetical protein
chrX	3099852	3100196	345	*	0	.	73.4243	-1	3.65715	172	Promoter	6	3095671	3099837	4167	2	180598	NM_076129	-15	WBGene00018703	sec-3	Exocyst complex component 1
chrX	3605912	3605998	87	*	0	.	76.3038	-1	3.65715	57	Promoter	6	3604510	3605734	1225	2	180652	NM_076219	-178	WBGene00015955	C18B2.4	hypothetical protein
chrX	4145495	4145839	345	*	0	.	50.5049	-1	3.65715	172	Promoter	6	4145501	4147222	1722	1	180689	NM_076303	0	WBGene00022745	ZK470.2	hypothetical protein
chrX	4606443	4606543	101	*	0	.	90.0741	-1	3.65715	41	Distal Intergenic	6	4596199	4605896	9698	2	259704	NM_001029733	-547	WBGene00020496	spat-3	Suppressor of PAr-Two defect
chrX	5837026	5837370	345	*	0	.	39.6708	-1	3.65715	172	Downstream (<1kb)	6	5832051	5834771	2721	2	184416	NM_076577	-2255	WBGene00017429	F13D11.4	hypothetical protein
chrX	6742091	6742435	345	*	0	.	57.1849	-1	3.65715	172	Promoter	6	6742486	6743669	1184	1	180942	NM_076735	-51	WBGene00003163	mdl-1	MAD-Like
chrX	8019662	8020006	345	*	0	.	30.4017	-1	3.65715	172	Intron (NM_001277030/181059, intron 2 of 14)	6	8019228	8025420	6193	1	181059	NM_076949	434	WBGene00016407	C34D10.2	hypothetical protein
chrX	8422070	8422414	345	*	0	.	45.3162	-1	3.65715	172	Promoter	6	8419111	8422052	2942	2	181096	NM_077028	-18	WBGene00006472	tag-123	Transmembrane 9 superfamily member
chrX	8761143	8761487	345	*	0	.	48.0029	-1	3.65715	172	Promoter	6	8754689	8761552	6864	2	181122	NM_077083	65	WBGene00019731	M02D8.5	hypothetical protein
chrX	10377774	10377964	191	*	0	.	119.359	-1	3.65715	82	Promoter	6	10373602	10377610	4009	2	185870	NM_077338	-164	WBGene00004375	rme-4	Receptor Mediated Endocytosis
chrX	10377885	10378229	345	*	0	.	32.4885	-1	3.65715	172	Promoter	6	10373602	10377610	4009	2	185870	NM_077338	-275	WBGene00004375	rme-4	Receptor Mediated Endocytosis
chrX	11207127	11207240	114	*	0	.	98.4147	-1	3.65715	63	Promoter	6	11204456	11207088	2633	2	181309	NM_077470	-39	WBGene00002029	hst-2	Heparan sulfate 2-O-sulfotransferase hst-2
chrX	11262350	11262694	345	*	0	.	51.1852	-1	3.65715	172	Promoter	6	11262911	11265889	2979	1	181315	NM_077478	-217	WBGene00007267	C03A3.2	Transmembrane protein 104 homolog
chrX	12975657	12976001	345	*	0	.	44.4691	-1	3.65715	172	Promoter	6	12969263	12975643	6381	2	181428	NM_077754	-14	WBGene00004089	ppk-3	PIP Kinase
chrX	13325077	13325421	345	*	0	.	36.5771	-1	3.65715	172	Exon (NM_077817/181454, exon 6 of 11)	6	13323159	13327448	4290	1	181454	NM_077817	1918	WBGene00009797	F46G10.2	hypothetical protein
chrX	13527375	13527719	345	*	0	.	60.2108	-1	3.65715	172	Distal Intergenic	6	13529102	13531522	2421	1	181474	NM_077860	-1383	WBGene00008940	F18H3.4	hypothetical protein
chrX	14480261	14480605	345	*	0	.	71.8734	-1	3.65715	172	Promoter	6	14480574	14484472	3899	1	181544	NM_078008	0	WBGene00001583	gfi-3	Protein gfi-3
chrX	15181456	15181800	345	*	0	.	60.6483	-1	3.65715	172	Promoter	6	15178667	15181455	2789	2	181612	NM_078122	-1	WBGene00011680	T10B10.3	hypothetical protein
chrX	15707573	15707670	98	*	0	.	59.6438	-1	3.65715	93	Intron (NR_053033/13192567, intron 1 of 1)	6	15710077	15716232	6156	1	181661	NM_001029827	-2407	WBGene00003638	nhr-48	Nuclear hormone receptor family member nhr-48
chrX	15849355	15849699	345	*	0	.	59.3543	-1	3.65715	172	Promoter	6	15849900	15851567	1668	1	181671	NM_078205	-201	WBGene00010339	acl-1	Putative 1-acyl-sn-glycerol-3-phosphate acyltransferase acl-1
chrX	16128901	16129245	345	*	0	.	35.3444	-1	3.65715	172	Promoter	6	16124399	16128813	4415	2	181689	NM_078233	-88	WBGene00014213	ZK1073.1	hypothetical protein
chrX	17151217	17151561	345	*	0	.	31.9366	-1	3.65715	172	Promoter	6	17151523	17154473	2951	1	181755	NM_078377	0	WBGene00007011	mdt-1.2	Mediator of RNA polymerase II transcription subunit 1.2
chrX	17627317	17627661	345	*	0	.	31.7831	-1	3.65715	172	Intron (NM_171981/181788, intron 1 of 5)	6	17623816	17627968	4153	2	181788	NM_171981	307	WBGene00019211	H18N23.2	Protein phosphatase 1 regulatory subunit
chrX	17628327	17628671	345	*	0	.	44.2824	-1	3.65715	172	Promoter	6	17623816	17628246	4431	2	181788	NM_171822	-81	WBGene00019211	H18N23.2	Protein phosphatase 1 regulatory subunit

## Sheet: N3M_up_N3MvF3M_intersect_MAB-5
seqnames	start	end	width	strand	score	name	thickStart	thickEnd	itemRgb	blockCount	annotation	geneChr	geneStart	geneEnd	geneLength	geneStrand	geneId	transcriptId	distanceToTSS	ENSEMBL	SYMBOL	GENENAME
chrI	535414	535514	101	*	0	.	73.8364	-1	3.65715	41	Promoter	1	535808	536493	686	1	171646	NM_001306344	-294	WBGene00022042	icd-2	Nascent polypeptide-associated complex subunit alpha
chrI	1435462	1435806	345	*	0	.	31.1667	-1	3.65715	172	Distal Intergenic	1	1436292	1441214	4923	1	171710	NM_058453	-486	WBGene00022373	mrpl-15	Mitochondrial Ribosomal Protein, Large
chrI	3787603	3787947	345	*	0	.	31.5848	-1	3.65715	172	Promoter	1	3788042	3788862	821	1	171949	NM_001025846	-95	WBGene00004425	rpl-13	60S ribosomal protein L13
chrI	5485842	5486186	345	*	0	.	35.0794	-1	3.65715	172	Promoter	1	5484830	5485593	764	2	172201	NM_059207	-249	WBGene00004431	rpl-19	60S ribosomal protein L19
chrI	6220865	6221209	345	*	0	.	48.0798	-1	3.65715	172	Promoter	1	6220149	6220750	602	2	172313	NM_059394	-115	WBGene00004486	rps-17	40S ribosomal protein S17
chrI	8329635	8329979	345	*	0	.	46.7577	-1	3.65715	172	Promoter	1	8329114	8329645	532	2	172617	NM_059862	0	WBGene00004439	rpl-25.2	60S ribosomal protein L23a 2
chrI	8409873	8409997	125	*	0	.	97.1507	-1	3.65715	88	Promoter	1	8408161	8409731	1571	2	172626	NM_059880	-142	WBGene00003014	lin-28	Protein lin-28
chrI	8426707	8427051	345	*	0	.	78.354	-1	3.65715	172	Downstream (<1kb)	1	8425166	8426075	910	2	172629	NM_001128971	-632	WBGene00008530	F02E9.5	hypothetical protein
chrI	8816476	8816637	162	*	0	.	88.3175	-1	3.65715	86	Promoter	1	8815600	8816185	586	2	172693	NM_059983	-291	WBGene00004484	rps-15	40S ribosomal protein S15
chrI	9688736	9689080	345	*	0	.	55.7929	-1	3.65715	172	Promoter	1	9689202	9690046	845	1	172818	NM_060175	-122	WBGene00004426	rpl-14	Ribosomal Protein, Large subunit
chrI	10642282	10642626	345	*	0	.	38.5197	-1	3.65715	172	Promoter	1	10640808	10642275	1468	2	172959	NM_060384	-7	WBGene00001228	eif-3.E	Eukaryotic translation initiation factor 3 subunit E
chrI	13463806	13464150	345	*	0	.	32.8618	-1	3.65715	172	Promoter	1	13463955	13464207	253	1	13182787	NR_050680	0	NA	rpr-1	ncRNA
chrI	13653787	13654131	345	*	0	.	52.4872	-1	3.65715	172	Promoter	1	13652992	13653685	694	2	173235	NM_060990	-102	WBGene00004445	rpl-31	60S ribosomal protein L31
chrI	15033945	15034289	345	*	0	.	38.2056	-1	3.65715	172	Promoter	1	15034532	15035276	745	1	173372	NM_061221	-243	WBGene00009367	F33H2.3	Acidic leucine-rich nuclear phosphoprotein 32-related protein 1
chrII	401285	401629	345	*	0	.	31.3593	-1	3.65715	172	Intron (NR_052766/13191439, intron 1 of 2)	2	402682	404120	1439	1	173430	NM_061324	-1053	WBGene00015403	clec-10	C-type LECtin
chrII	2289381	2289725	345	*	0	.	30.0999	-1	3.65715	172	Promoter	2	2289797	2290243	447	1	24104743	NM_001306560	-72	WBGene00235164	K09F6.13	hypothetical protein
chrII	4376842	4376943	102	*	0	.	90.4619	-1	3.65715	20	Distal Intergenic	2	4372946	4375716	2771	2	173773	NM_062371	-1126	WBGene00003825	ntl-2	NOT-Like (yeast CCR4/NOT complex component)
chrII	6250785	6251129	345	*	0	.	41.1229	-1	3.65715	172	Promoter	2	6251415	6252535	1121	1	174034	NM_062849	-286	WBGene00004015	phb-2	Mitochondrial prohibitin complex protein 2
chrII	8561331	8561533	203	*	0	.	167.932	-1	3.65715	109	Downstream (2-3kb)	2	8559808	8560955	1148	2	174367	NM_063406	-376	WBGene00002065	iff-2	Eukaryotic translation initiation factor 5A-2
chrII	8787506	8787667	162	*	0	.	103.153	-1	3.65715	63	Distal Intergenic	2	8790698	8790912	215	1	174406	NM_063469	-3031	WBGene00008563	F07H5.13	hypothetical protein
chrII	9099024	9099368	345	*	0	.	41.1641	-1	3.65715	172	Promoter	2	9099378	9100455	1078	1	174450	NM_063540	-10	WBGene00012000	T24H10.1	Putative transcription elongation factor S-II
chrII	9265104	9265267	164	*	0	.	74.2296	-1	3.65715	27	Distal Intergenic	2	9267539	9268296	758	1	174468	NM_063573	-2272	WBGene00007224	C01G6.2	hypothetical protein
chrII	10203196	10203540	345	*	0	.	30.6111	-1	3.65715	172	Distal Intergenic	2	10201125	10202230	1106	2	174583	NR_000803	-966	NA	tts-2	ncRNA
chrII	12768259	12768603	345	*	0	.	38.9087	-1	3.65715	172	Promoter	2	12767322	12768217	896	2	174908	NM_064316	-42	WBGene00012903	vps-2	related to yeast Vacuolar Protein Sorting factor
chrII	13872600	13872784	185	*	0	.	109.6	-1	3.65715	71	Promoter	2	13872871	13875218	2348	1	175038	NM_064506	-87	WBGene00013094	Y51H1A.3	hypothetical protein
chrII	14814940	14815284	345	*	0	.	35.0304	-1	3.65715	172	Promoter	2	14815518	14816096	579	1	175141	NM_064671	-234	WBGene00012179	W01D2.1	Ribosomal protein L37
chrIII	5571037	5571381	345	*	0	.	65.3509	-1	3.65715	172	Distal Intergenic	3	5568314	5568749	436	2	184261	NM_065793	-2288	WBGene00017305	nspb-12	Nematode Specific Peptide family, group B
chrIII	6279994	6280338	345	*	0	.	41.3279	-1	3.65715	172	Promoter	3	6280606	6281934	1329	1	175890	NM_001027428	-268	WBGene00001972	hmg-1.2	High mobility group protein 1.2
chrIII	6431760	6432104	345	*	0	.	52.3939	-1	3.65715	172	Promoter	3	6431153	6431792	640	2	175912	NM_066008	0	WBGene00015487	mrps-17	28S ribosomal protein S17, mitochondrial
chrIII	7179793	7179882	90	*	0	.	60.9774	-1	3.65715	68	Promoter	3	7179030	7179579	550	2	176006	NM_066171	-214	WBGene00004483	rps-14	40S ribosomal protein S14
chrIII	7208025	7208144	120	*	0	.	69.6489	-1	3.65715	60	Downstream (1-2kb)	3	7208455	7209755	1301	1	176015	NM_066183	-311	WBGene00004417	rpl-6	60S ribosomal protein L6
chrIII	7534734	7534905	172	*	0	.	129.72	-1	3.65715	89	Promoter	3	7529116	7534700	5585	2	176068	NM_001025993	-34	WBGene00003024	lin-39	Homeobox protein lin-39
chrIII	7535339	7535683	345	*	0	.	46.5572	-1	3.65715	172	Downstream (1-2kb)	3	7529116	7534700	5585	2	176068	NM_001025993	-639	WBGene00003024	lin-39	Homeobox protein lin-39
chrIII	7552864	7553208	345	*	0	.	56.5935	-1	3.65715	172	Distal Intergenic	3	7555661	7557730	2070	1	176069	NM_066254	-2453	WBGene00000437	ceh-13	Homeobox protein ceh-13
chrIII	7554732	7555011	280	*	0	.	182.323	-1	3.65715	154	Downstream (2-3kb)	3	7555661	7557730	2070	1	176069	NM_066254	-650	WBGene00000437	ceh-13	Homeobox protein ceh-13
chrIII	7854564	7854811	248	*	0	.	235.625	-1	3.65715	118	Downstream (1-2kb)	3	7855150	7855574	425	1	176097	NM_066301	-339	WBGene00004449	rpl-35	60S ribosomal protein L35
chrIII	8043869	8044077	209	*	0	.	111.993	-1	3.65715	111	Downstream (<1kb)	3	8044487	8044780	294	1	187337	NM_066353	-410	WBGene00019680	K12H4.5	hypothetical protein
chrIII	8130423	8130767	345	*	0	.	36.6413	-1	3.65715	172	Promoter	3	8130865	8132271	1407	1	259519	NM_171208	-98	WBGene00015755	C14B9.10	hypothetical protein
chrIII	8767916	8768260	345	*	0	.	41.4387	-1	3.65715	172	Promoter	3	8768314	8769153	840	1	187502	NM_066534	-54	WBGene00019800	mtss-1	Single-stranded DNA-binding protein, mitochondrial
chrIII	9780651	9780995	345	*	0	.	41.1857	-1	3.65715	172	Promoter	3	9781254	9781763	510	1	176383	NM_066764	-259	WBGene00006910	vha-1	V-type proton ATPase 16 kDa proteolipid subunit 1
chrIII	10505184	10505528	345	*	0	.	52.5515	-1	3.65715	172	Promoter	3	10505480	10505832	353	1	13191153	NM_001268151	0	WBGene00185048	urm-1	Ubiquitin-related modifier 1 homolog
chrIII	10599712	10600056	345	*	0	.	31.2257	-1	3.65715	172	Promoter	3	10596957	10599651	2695	2	189705	NM_001027664	-61	WBGene00012641	epg-6	Ectopic P Granules
chrIII	10905203	10905547	345	*	0	.	52.0515	-1	3.65715	172	Intron (NM_001268159/176519, intron 1 of 4)	3	10906470	10908754	2285	1	176519	NM_001268160	-923	WBGene00006843	unc-119	Protein unc-119
chrIII	10907688	10908032	345	*	0	.	50.7763	-1	3.65715	172	Promoter	3	10907598	10908754	1157	1	176519	NM_001268161	90	WBGene00006843	unc-119	Protein unc-119
chrIII	13002174	13002518	345	*	0	.	32.2031	-1	3.65715	172	Distal Intergenic	3	13003966	13005280	1315	1	13191684	NM_001268256	-1448	WBGene00164985	ZK1010.10	hypothetical protein
chrIV	385509	385676	168	*	0	.	82.7965	-1	3.65715	63	Promoter	4	385909	386549	641	1	176858	NM_067514	-233	WBGene00004493	rps-24	Ribosomal Protein, Small subunit
chrIV	654816	655045	230	*	0	.	215.795	-1	3.65715	113	Promoter	4	653538	654571	1034	2	176891	NM_067563	-245	WBGene00004427	rpl-15	60S ribosomal protein L15
chrIV	1659142	1659359	218	*	0	.	135.033	-1	3.65715	99	Downstream (<1kb)	4	1659704	1659956	253	1	176975	NM_067714	-345	WBGene00004497	rps-28	40S ribosomal protein S28
chrIV	6646004	6646348	345	*	0	.	55.1893	-1	3.65715	172	Promoter	4	6646414	6646533	120	1	177433	NM_001026113	-66	WBGene00001858	hil-7	HIstone H1 Like
chrIV	7084795	7085139	345	*	0	.	67.1	-1	3.65715	172	Promoter	4	7083735	7084661	927	2	177481	NM_068702	-134	WBGene00004473	rps-4	40S ribosomal protein S4
chrIV	7486215	7486559	345	*	0	.	58.0003	-1	3.65715	172	Promoter	4	7485834	7486217	384	2	177521	NM_068800	0	WBGene00001935	his-61	Histone H2A
chrIV	7487956	7488300	345	*	0	.	48.6303	-1	3.65715	172	Promoter	4	7487681	7487992	312	2	177522	NM_068802	0	WBGene00001875	his-60	Histone H4
chrIV	7817858	7818202	345	*	0	.	41.8517	-1	3.65715	172	Promoter	4	7818263	7820746	2484	1	177570	NM_068898	-61	WBGene00004363	ric-3	Resistance to inhibitors of cholinesterase protein 3
chrIV	8476145	8476489	345	*	0	.	33.7761	-1	3.65715	172	Downstream (1-2kb)	4	8477183	8478128	946	1	177651	NM_171400	-694	WBGene00004995	spp-10	SaPosin-like Protein family
chrIV	8762426	8762770	345	*	0	.	29.6966	-1	3.65715	172	Distal Intergenic	4	8756735	8761996	5262	2	177685	NM_171407	-430	WBGene00002222	klp-11	Kinesin-like protein
chrIV	9081227	9081571	345	*	0	.	46.1089	-1	3.65715	172	Distal Intergenic	4	9082363	9087342	4980	1	177727	NM_001028425	-792	WBGene00006663	twk-8	TWiK family of potassium channels
chrIV	10065169	10065513	345	*	0	.	55.2804	-1	3.65715	172	Distal Intergenic	4	10067875	10069966	2092	1	177870	NM_069421	-2362	WBGene00000858	cwn-2	Protein Wnt-2
chrIV	11111209	11111553	345	*	0	.	32.7933	-1	3.65715	172	Promoter	4	11110216	11111044	829	2	178012	NM_069676	-165	WBGene00004474	rps-5	40S ribosomal protein S5
chrIV	13704096	13704286	191	*	0	.	121.251	-1	3.65715	108	Promoter	4	13701774	13703955	2182	2	178338	NM_070246	-141	WBGene00006580	tlp-1	T lineage defect, LePtoderan tail
chrIV	13881906	13882004	99	*	0	.	57.8931	-1	3.65715	18	Promoter	4	13882242	13882584	343	1	178352	NM_001268834	-238	WBGene00004443	rpl-29	60S ribosomal protein L29
chrIV	14825084	14825428	345	*	0	.	37.5629	-1	3.65715	172	Promoter	4	14825699	14826364	666	1	178408	NM_070393	-271	WBGene00004487	rps-18	Ribosomal Protein, Small subunit
chrV	773364	773482	119	*	0	.	57.1163	-1	3.65715	48	Promoter	5	773591	774715	1125	1	178587	NM_070921	-109	WBGene00019983	sti-1	Stress-induced-phosphoprotein 1
chrV	1060598	1060713	116	*	0	.	60.0072	-1	3.65715	37	Distal Intergenic	5	1061597	1067856	6260	1	190096	NM_070969	-884	WBGene00019624	K10C9.3	hypothetical protein
chrV	1471609	1471953	345	*	0	.	41.0997	-1	3.65715	172	Intron (NR_052229/13189113, intron 1 of 1)	5	1469060	1470962	1903	1	178639	NM_001313187	2549	WBGene00018757	tag-304	hypothetical protein
chrV	1575746	1576090	345	*	0	.	52.7871	-1	3.65715	172	Intron (NR_132503/178645, intron 1 of 6)	5	1577738	1584934	7197	1	178645	NM_071045	-1648	WBGene00000387	cdc-25.2	M-phase inducer phosphatase cdc-25.2
chrV	3390958	3391302	345	*	0	.	33.6428	-1	3.65715	172	Downstream (2-3kb)	5	3393586	3394688	1103	2	188650	NM_071545	3386	WBGene00020620	T20D4.15	hypothetical protein
chrV	4491684	4492028	345	*	0	.	65.0288	-1	3.65715	172	Distal Intergenic	5	4497467	4510891	13425	1	178845	NM_001028998	-5439	WBGene00006796	unc-62	Homeobox protein unc-62
chrV	4495088	4495432	345	*	0	.	79.9749	-1	3.65715	172	Distal Intergenic	5	4497467	4510891	13425	1	178845	NM_001028998	-2035	WBGene00006796	unc-62	Homeobox protein unc-62
chrV	4507123	4507467	345	*	0	.	33.6323	-1	3.65715	172	Intron (NM_001028998/178845, intron 8 of 9)	5	4505814	4510891	5078	1	178845	NM_001029000	1309	WBGene00006796	unc-62	Homeobox protein unc-62
chrV	4507893	4508066	174	*	0	.	51.2831	-1	3.65715	80	Intron (NM_001028998/178845, intron 8 of 9)	5	4509913	4510891	979	1	178845	NM_001029001	-1847	WBGene00006796	unc-62	Homeobox protein unc-62
chrV	4508172	4508479	308	*	0	.	81.5573	-1	3.65715	135	Intron (NM_001028998/178845, intron 8 of 9)	5	4509913	4510891	979	1	178845	NM_001029001	-1434	WBGene00006796	unc-62	Homeobox protein unc-62
chrV	4509369	4509713	345	*	0	.	34.0746	-1	3.65715	172	Promoter	5	4509913	4510891	979	1	178845	NM_001029001	-200	WBGene00006796	unc-62	Homeobox protein unc-62
chrV	7060362	7060706	345	*	0	.	39.1319	-1	3.65715	172	Promoter	5	7059822	7060358	537	2	179092	NM_072391	-4	WBGene00021959	Y57E12AL.6	hypothetical protein
chrV	8210551	8210895	345	*	0	.	33.4459	-1	3.65715	172	Promoter	5	8208235	8210557	2323	2	179200	NM_072715	0	WBGene00019479	K07C11.7	UPF0046 protein K07C11.7
chrV	8494304	8494648	345	*	0	.	59.4917	-1	3.65715	172	Promoter	5	8494895	8502160	7266	1	191484	NM_072787	-247	WBGene00004256	pxn-1	Peroxidasin homolog
chrV	10897254	10897476	223	*	0	.	174.183	-1	3.65715	124	Promoter	5	10896880	10897135	256	2	179510	NM_073377	-119	WBGene00001303	emo-1	Protein transport protein Sec61 subunit gamma
chrV	11638593	11638937	345	*	0	.	50.5002	-1	3.65715	172	Downstream (2-3kb)	5	11631872	11637206	5335	2	179596	NM_001276934	-1387	WBGene00012100	sipa-1	SIPA (vertebrate Signal-Induced Proliferation-Associated) homolog
chrV	12318158	12318502	345	*	0	.	46.6708	-1	3.65715	172	Promoter	5	12318627	12319995	1369	1	179690	NM_073689	-125	WBGene00011015	R04F11.2	hypothetical protein
chrV	12343660	12343821	162	*	0	.	98.1312	-1	3.65715	90	Promoter	5	12342481	12343467	987	2	179691	NM_073691	-193	WBGene00009092	tomm-20	Mitochondrial import receptor subunit TOM20 homolog
chrV	14012086	14012430	345	*	0	.	35.7829	-1	3.65715	172	Promoter	5	14012579	14013440	862	1	179898	NM_074078	-149	WBGene00000097	aip-1	Arsenite Inducible Protein
chrV	14355784	14356128	345	*	0	.	49.4286	-1	3.65715	172	Promoter	5	14356081	14356722	642	1	179936	NM_074160	0	WBGene00000877	cyn-1	Peptidyl-prolyl cis-trans isomerase 1
chrV	15189712	15189835	124	*	0	.	70.2768	-1	3.65715	58	Promoter	5	15189952	15190833	882	1	180028	NM_074350	-117	WBGene00000879	cyn-3	Peptidyl-prolyl cis-trans isomerase 3
chrV	15511638	15511982	345	*	0	.	41.7861	-1	3.65715	172	Promoter	5	15512195	15512679	485	1	180044	NM_074459	-213	WBGene00004452	rpl-38	60S ribosomal protein L38
chrV	20789131	20789475	345	*	0	.	34.6025	-1	3.65715	172	Promoter	5	20789549	20790481	933	1	180360	NM_075610	-74	WBGene00012853	Y44A6D.2	hypothetical protein
chrX	690675	691019	345	*	0	.	30.9191	-1	3.65715	172	Distal Intergenic	6	693029	702447	9419	1	180418	NM_171616	-2010	WBGene00017184	ncam-1	NCAM (neural cell adhesion molecule) homolog
chrX	1120371	1120715	345	*	0	.	50.5992	-1	3.65715	172	Downstream (1-2kb)	6	1117347	1119397	2051	2	180465	NM_075812	-974	WBGene00015474	C05D9.7	hypothetical protein
chrX	2604637	2604981	345	*	0	.	46.7824	-1	3.65715	172	Exon (NM_001029702/180560, exon 10 of 12)	6	2608232	2609836	1605	1	188029	NM_076068	-3251	WBGene00020194	T03G6.1	hypothetical protein
chrX	2975546	2975636	91	*	0	.	64.4327	-1	3.65715	42	Distal Intergenic	6	2976473	2980902	4430	1	189836	NM_076108	-837	WBGene00021527	aakg-3	AMP-Activated protein Kinase Gamma subunit
chrX	6092075	6092243	169	*	0	.	117.408	-1	3.65715	109	Distal Intergenic	6	6089391	6091763	2373	2	180880	NM_076618	-312	WBGene00002007	hsp-3	Heat shock 70 kDa protein C
chrX	8160056	8160400	345	*	0	.	48.9607	-1	3.65715	172	Downstream (1-2kb)	6	8159196	8159877	682	1	181073	NM_076974	860	WBGene00001854	hil-3	Histone H1.3
chrX	12080514	12080858	345	*	0	.	32.7458	-1	3.65715	172	Promoter	6	12076807	12080222	3416	2	181377	NM_077618	-292	WBGene00012226	W03G11.4	hypothetical protein
chrX	16612227	16612571	345	*	0	.	62.0521	-1	3.65715	172	Distal Intergenic	6	16613493	16616247	2755	1	181719	NM_078286	-922	WBGene00015547	ain-1	ALG-1 INteracting protein
chrX	16612428	16612772	345	*	0	.	46.2116	-1	3.65715	172	Distal Intergenic	6	16613493	16616247	2755	1	181719	NM_078286	-721	WBGene00015547	ain-1	ALG-1 INteracting protein
chrX	16634746	16635090	345	*	0	.	50.1753	-1	3.65715	172	Exon (NM_001129626/181720, exon 6 of 12)	6	16633368	16637212	3845	1	181720	NM_078288	1378	WBGene00015545	C06G1.1	hypothetical protein

## Sheet: F3M_up_N3MvF3M_intersect_MAB-5
seqnames	start	end	width	strand	score	name	thickStart	thickEnd	itemRgb	blockCount	annotation	geneChr	geneStart	geneEnd	geneLength	geneStrand	geneId	transcriptId	distanceToTSS	ENSEMBL	SYMBOL	GENENAME
chrI	288985	289329	345	*	0	.	48.9343	-1	3.65715	172	Promoter	1	286352	289035	2684	2	171617	NM_001306288	0	WBGene00016905	ztf-3	Zinc finger putative Transcription Factor family
chrI	295823	296167	345	*	0	.	33.0624	-1	3.65715	172	Exon (NM_058311/171618, exon 2 of 8)	1	295367	305080	9714	1	171618	NM_058312	456	WBGene00016902	C53D5.1	hypothetical protein
chrI	1481552	1481896	345	*	0	.	45.8586	-1	3.65715	172	Distal Intergenic	1	1483106	1490321	7216	1	171715	NM_058459	-1210	WBGene00001115	dyb-1	Dystrobrevin-1
chrI	3516358	3516514	157	*	0	.	102.643	-1	3.65715	93	Promoter	1	3516552	3523250	6699	1	171920	NM_058772	-38	WBGene00021636	pcaf-1	P300/CBP Associated Factor homolog
chrI	3721389	3721733	345	*	0	.	51.8968	-1	3.65715	172	Distal Intergenic	1	3713764	3721060	7297	2	266825	NM_058805	-329	WBGene00003040	lin-59	Probable histone-lysine N-methyltransferase lin-59
chrI	3721590	3721934	345	*	0	.	30.1122	-1	3.65715	172	Distal Intergenic	1	3713764	3721060	7297	2	266825	NM_058805	-530	WBGene00003040	lin-59	Probable histone-lysine N-methyltransferase lin-59
chrI	3740463	3740807	345	*	0	.	31.9828	-1	3.65715	172	Promoter	1	3734429	3740334	5906	2	171942	NM_058808	-129	WBGene00004147	larp-5	LARP (RNA binding La related protein) homolog
chrI	4218409	4218530	122	*	0	.	71.5438	-1	3.65715	49	Distal Intergenic	1	4214423	4215667	1245	2	172020	NM_058930	-2742	WBGene00015976	C18E3.9	hypothetical protein
chrI	4535920	4536264	345	*	0	.	38.5965	-1	3.65715	172	Downstream (1-2kb)	1	4528372	4534798	6427	2	172054	NM_182079	-1122	WBGene00022473	bet-1	Bromodomain-containing protein bet-1
chrI	4926417	4926761	345	*	0	.	33.6954	-1	3.65715	172	Promoter	1	4926733	4927934	1202	1	172111	NM_182065	0	WBGene00017886	F28B3.5	hypothetical protein
chrI	6358403	6358747	345	*	0	.	31.0355	-1	3.65715	172	Promoter	1	6358675	6360158	1484	1	172334	NM_001129018	0	WBGene00019396	K04F10.3	hypothetical protein
chrI	6780102	6780446	345	*	0	.	30.5773	-1	3.65715	172	Promoter	1	6774516	6779906	5391	2	172398	NM_059539	-196	WBGene00004111	pqn-21	Prion-like-(Q/N-rich)-domain-bearing protein
chrI	7128142	7128486	345	*	0	.	45.03	-1	3.65715	172	Promoter	1	7123060	7128137	5078	2	172450	NM_059617	-5	WBGene00006753	unc-14	hypothetical protein
chrI	7129438	7129782	345	*	0	.	68.5919	-1	3.65715	172	Distal Intergenic	1	7123060	7128137	5078	2	172450	NM_059617	-1301	WBGene00006753	unc-14	hypothetical protein
chrI	7370092	7370436	345	*	0	.	72.51	-1	3.65715	172	Intron (NM_059682/184108, intron 1 of 10)	1	7360657	7371459	10803	2	184108	NM_059682	1023	WBGene00006306	sue-1	SUppressor of Elongation defect
chrI	7595482	7595826	345	*	0	.	31.5227	-1	3.65715	172	Distal Intergenic	1	7596526	7601903	5378	1	172518	NM_001263616	-700	WBGene00008419	wdr-23	DDB1-and CUL4-associated factor 11 homolog
chrI	7830299	7830643	345	*	0	.	44.9691	-1	3.65715	172	Intron (NM_059761/172547, intron 1 of 6)	1	7826491	7831526	5036	2	172547	NM_059761	883	WBGene00009271	glna-3	Putative glutaminase 3
chrI	8747925	8748269	345	*	0	.	39.9634	-1	3.65715	172	Downstream (1-2kb)	1	8743849	8746925	3077	2	183252	NM_059965	-1000	WBGene00007976	C36B1.9	hypothetical protein
chrI	9141604	9141948	345	*	0	.	40.6016	-1	3.65715	172	Promoter	1	9138812	9141520	2709	2	172739	NM_060050	-84	WBGene00014119	ZK858.6	Transmembrane 9 superfamily member
chrI	9343805	9344149	345	*	0	.	51.0801	-1	3.65715	172	Downstream (<1kb)	1	9335965	9341897	5933	2	172760	NM_001025828	-1908	WBGene00003026	lin-41	Protein lin-41
chrI	9625978	9626178	201	*	0	.	145.2	-1	3.65715	95	Promoter	1	9626275	9630358	4084	1	3565010	NM_001026439	-97	WBGene00002027	hsr-9	Protein hsr-9
chrI	9665131	9665250	120	*	0	.	72.5571	-1	3.65715	67	Promoter	1	9665311	9668436	3126	1	172814	NM_001025808	-61	WBGene00000466	cel-1	mRNA guanylyltransferase
chrI	9984920	9985264	345	*	0	.	29.9516	-1	3.65715	172	Promoter	1	9982656	9984786	2131	2	172859	NM_060239	-134	WBGene00006379	sys-1	SYmmetrical Sister cell hermaphrodite gonad defect
chrI	13663255	13663499	245	*	0	.	128.901	-1	3.65715	145	Promoter	1	13663537	13674884	11348	1	173238	NM_060995	-38	WBGene00012234	W04A4.5	hypothetical protein
chrI	14809303	14809647	345	*	0	.	40.9954	-1	3.65715	172	Intron (NM_061182/173351, intron 1 of 6)	1	14807480	14815330	7851	1	173351	NM_061181	1823	WBGene00004889	smp-1	Semaphorin-1A
chrI	15022948	15023292	345	*	0	.	36.6535	-1	3.65715	172	Promoter	1	15017473	15022980	5508	2	173370	NM_061217	0	WBGene00001049	dog-1	Deletions Of G-rich DNA
chrII	255250	255449	200	*	0	.	149.333	-1	3.65715	94	Promoter	2	241114	255182	14069	2	173410	NM_061286	-68	WBGene00004166	pqn-85	Nipped-B protein;Nipped-B-like protein pqn-85
chrII	4791279	4791623	345	*	0	.	44.671	-1	3.65715	172	Promoter	2	4791622	4795510	3889	1	173826	NM_062458	0	WBGene00017837	F26G1.1	hypothetical protein
chrII	4999247	4999404	158	*	0	.	84.0606	-1	3.65715	65	Promoter	2	4999524	5003641	4118	1	173864	NM_062520	-120	WBGene00019087	F59A6.5	hypothetical protein
chrII	5055295	5055463	169	*	0	.	95.2195	-1	3.65715	54	Promoter	2	5054261	5055155	895	2	173872	NM_062530	-140	WBGene00002068	ify-1	Securin-like protein
chrII	5660967	5661311	345	*	0	.	38.2446	-1	3.65715	172	Promoter	2	5661194	5664370	3177	1	173960	NM_170997	0	WBGene00016115	mdt-26	MeDiaTor
chrII	5661713	5662057	345	*	0	.	64.2226	-1	3.65715	172	Exon (NM_170997/173960, exon 2 of 8)	2	5661194	5664372	3179	1	173960	NR_151553	519	WBGene00016115	mdt-26	MeDiaTor
chrII	7105018	7105362	345	*	0	.	31.9551	-1	3.65715	172	Promoter	2	7101533	7105001	3469	2	174165	NM_063066	-17	WBGene00017349	farl-11	FAR (Factor ARrest) Like
chrII	8086826	8087170	345	*	0	.	40.4831	-1	3.65715	172	Promoter	2	8081222	8086847	5626	2	174300	NM_001322741	0	WBGene00010502	K02C4.3	Probable ubiquitin carboxyl-terminal hydrolase K02C4.3
chrII	9974990	9975334	345	*	0	.	48.7953	-1	3.65715	172	Promoter	2	9971554	9974704	3151	2	174556	NM_063754	-286	WBGene00011276	aakg-5	AMP-Activated protein Kinase Gamma subunit
chrII	10349963	10350307	345	*	0	.	35.4192	-1	3.65715	172	Promoter	2	10347143	10350005	2863	2	174600	NM_063825	0	WBGene00007412	stip-1	Septin and tuftelin-interacting protein 1 homolog
chrII	11724513	11724857	345	*	0	.	33.7441	-1	3.65715	172	Downstream (1-2kb)	2	11725323	11726431	1109	1	174798	NM_001356894	-466	WBGene00002262	ldh-1	L-lactate dehydrogenase
chrII	13908614	13908958	345	*	0	.	42.3362	-1	3.65715	172	Promoter	2	13908925	13915119	6195	1	175043	NM_064513	0	WBGene00012198	W02B8.2	hypothetical protein
chrIII	3456351	3456498	148	*	0	.	110.587	-1	3.65715	93	Promoter	3	3456600	3460045	3446	1	175448	NM_065311	-102	WBGene00007921	C34C12.2	hypothetical protein
chrIII	4720843	4721187	345	*	0	.	61.8713	-1	3.65715	172	Promoter	3	4715587	4720665	5079	2	175621	NM_065568	-178	WBGene00001259	emb-5	Suppressor of Ty 6 homolog
chrIII	6988037	6988381	345	*	0	.	47.0154	-1	3.65715	172	Distal Intergenic	3	6990356	7002175	11820	1	175980	NM_001276777	-1975	WBGene00004182	prk-1	Pim (mammalian oncogene) Related Kinase
chrIII	8093119	8093463	345	*	0	.	52.5386	-1	3.65715	172	Promoter	3	8093585	8096168	2584	1	187077	NM_066366	-122	WBGene00019456	K06H7.2	hypothetical protein
chrIII	8358227	8358571	345	*	0	.	51.1942	-1	3.65715	172	Promoter	3	8356987	8358264	1278	2	187602	NM_066442	0	WBGene00019881	R05D3.8	Putative RNA-binding protein R05D3.8
chrIII	8802046	8802390	345	*	0	.	39.4958	-1	3.65715	172	Intron (NR_136383/176237, intron 10 of 14)	3	8802954	8805625	2672	1	176237	NM_001027440	-564	WBGene00006975	zfp-1	Zinc Finger Protein
chrIII	11290559	11290903	345	*	0	.	30.918	-1	3.65715	172	Promoter	3	11286421	11290565	4145	2	176558	NM_067051	0	WBGene00012933	mib-1	MIB (MIndBomb) ubiquitin ligase homolog
chrIII	13466339	13466498	160	*	0	.	89.5679	-1	3.65715	65	Promoter	3	13464818	13466295	1478	2	176774	NM_067382	-44	WBGene00000407	cdk-5	Cyclin-dependent-like kinase 5
chrIV	7723588	7723932	345	*	0	.	43.1629	-1	3.65715	172	Distal Intergenic	4	7720633	7723197	2565	2	177553	NM_068861	-391	WBGene00016846	C50F7.6	hypothetical protein
chrIV	7789483	7789827	345	*	0	.	30.3618	-1	3.65715	172	Promoter	4	7786198	7789489	3292	2	177565	NM_001313020	0	WBGene00016378	imp-3	IntraMembrane Protease (IMPAS) family
chrIV	8432778	8433122	345	*	0	.	71.6666	-1	3.65715	172	Promoter	4	8433142	8437571	4430	1	177644	NM_069035	-20	WBGene00020824	T26A8.1	hypothetical protein
chrIV	8620111	8620455	345	*	0	.	32.1339	-1	3.65715	172	Distal Intergenic	4	8620762	8625655	4894	1	177666	NM_069074	-307	WBGene00003034	lin-49	Protein lin-49
chrIV	9216497	9216841	345	*	0	.	35.7072	-1	3.65715	172	Distal Intergenic	4	9217754	9220173	2420	1	177744	NM_069203	-913	WBGene00008110	C46C2.2	hypothetical protein
chrIV	10933115	10933459	345	*	0	.	46.8665	-1	3.65715	172	Promoter	4	10926924	10933105	6182	2	177987	NM_001276853	-10	WBGene00001017	dnc-1	DyNactin Complex component
chrIV	12404118	12404462	345	*	0	.	34.7246	-1	3.65715	172	Promoter	4	12404435	12408440	4006	1	178191	NM_069967	0	WBGene00001580	gex-3	Membrane-associated protein gex-3
chrIV	15471510	15471716	207	*	0	.	159.354	-1	3.65715	87	Promoter	4	15471288	15471482	195	2	178432	NM_001129358	-28	WBGene00013530	ntl-11	NOT-Like (yeast CCR4/NOT complex component)
chrIV	16415614	16415958	345	*	0	.	31.0419	-1	3.65715	172	Promoter	4	16416085	16416683	599	1	190478	NM_001268961	-127	WBGene00013419	Y65A5A.2	hypothetical protein
chrIV	16995513	16995857	345	*	0	.	31.5694	-1	3.65715	172	Promoter	4	16995822	17014586	18765	1	3565076	NM_001047548	0	WBGene00004403	rom-4	Rhomboid-like protein
chrV	5110728	5111072	345	*	0	.	37.0513	-1	3.65715	172	Promoter	5	5108195	5110766	2572	2	182223	NM_071968	0	WBGene00015449	ugt-63	UDP-GlucuronosylTransferase
chrV	8437539	8437659	121	*	0	.	60.6647	-1	3.65715	35	Intron (NM_072772/179225, intron 1 of 15)	5	8416178	8438409	22232	2	179225	NM_072772	750	WBGene00018700	lmd-3	LysM Domain (peptidoglycan binding) protein
chrV	8949396	8949740	345	*	0	.	32.1093	-1	3.65715	172	Promoter	5	8949658	8955414	5757	1	179274	NM_001028970	0	WBGene00001526	gck-1	Germinal center kinase 1
chrV	10808021	10808193	173	*	0	.	96.4663	-1	3.65715	87	Promoter	5	10806197	10807895	1699	2	179500	NM_001269330	-126	WBGene00006481	plrg-1	PLeiotropic ReGulator (vertebrate) homolog
chrV	10858389	10858733	345	*	0	.	71.3761	-1	3.65715	172	Intron (NM_001307768/179505, intron 1 of 7)	5	10852883	10859781	6899	2	179505	NM_001307768	1048	WBGene00010012	saeg-1	Suppressor of activated egl-4 protein 1
chrV	10871402	10871746	345	*	0	.	32.169	-1	3.65715	172	Distal Intergenic	5	10852883	10865699	12817	2	179505	NM_073368	-5703	WBGene00010012	saeg-1	Suppressor of activated egl-4 protein 1
chrV	13041663	13042007	345	*	0	.	64.9284	-1	3.65715	172	Promoter	5	13038756	13041721	2966	2	179789	NM_073858	0	WBGene00012337	W07G4.3	hypothetical protein
chrV	13313073	13313417	345	*	0	.	44.6605	-1	3.65715	172	Promoter	5	13313598	13315487	1890	1	179811	NM_001269569	-181	WBGene00008219	C50B6.3	hypothetical protein
chrV	13789407	13789751	345	*	0	.	57.1875	-1	3.65715	172	Promoter	5	13789887	13795919	6033	1	179874	NM_001047656	-136	WBGene00009975	F53C11.5	hypothetical protein
chrV	13790545	13790889	345	*	0	.	48.2347	-1	3.65715	172	Promoter	5	13791025	13795919	4895	1	179874	NM_001047657	-136	WBGene00009975	F53C11.5	hypothetical protein
chrV	14143635	14143979	345	*	0	.	53.3625	-1	3.65715	172	Intron (NM_001356754/179912, intron 1 of 11)	5	14117600	14145367	27768	2	179912	NM_001356754	1388	WBGene00003916	par-1	Serine/threonine-protein kinase par-1
chrX	3099852	3100196	345	*	0	.	73.4243	-1	3.65715	172	Promoter	6	3095671	3099837	4167	2	180598	NM_076129	-15	WBGene00018703	sec-3	Exocyst complex component 1
chrX	3605912	3605998	87	*	0	.	76.3038	-1	3.65715	57	Promoter	6	3604510	3605734	1225	2	180652	NM_076219	-178	WBGene00015955	C18B2.4	hypothetical protein
chrX	8422070	8422414	345	*	0	.	45.3162	-1	3.65715	172	Promoter	6	8419111	8422052	2942	2	181096	NM_077028	-18	WBGene00006472	tag-123	Transmembrane 9 superfamily member
chrX	8761143	8761487	345	*	0	.	48.0029	-1	3.65715	172	Promoter	6	8754689	8761552	6864	2	181122	NM_077083	65	WBGene00019731	M02D8.5	hypothetical protein
chrX	10377774	10377964	191	*	0	.	119.359	-1	3.65715	82	Promoter	6	10373602	10377610	4009	2	185870	NM_077338	-164	WBGene00004375	rme-4	Receptor Mediated Endocytosis
chrX	10377885	10378229	345	*	0	.	32.4885	-1	3.65715	172	Promoter	6	10373602	10377610	4009	2	185870	NM_077338	-275	WBGene00004375	rme-4	Receptor Mediated Endocytosis
chrX	11207127	11207240	114	*	0	.	98.4147	-1	3.65715	63	Promoter	6	11204456	11207088	2633	2	181309	NM_077470	-39	WBGene00002029	hst-2	Heparan sulfate 2-O-sulfotransferase hst-2
chrX	12975657	12976001	345	*	0	.	44.4691	-1	3.65715	172	Promoter	6	12969263	12975643	6381	2	181428	NM_077754	-14	WBGene00004089	ppk-3	PIP Kinase
chrX	15181456	15181800	345	*	0	.	60.6483	-1	3.65715	172	Promoter	6	15178667	15181455	2789	2	181612	NM_078122	-1	WBGene00011680	T10B10.3	hypothetical protein
chrX	15707573	15707670	98	*	0	.	59.6438	-1	3.65715	93	Intron (NR_053033/13192567, intron 1 of 1)	6	15710077	15716232	6156	1	181661	NM_001029827	-2407	WBGene00003638	nhr-48	Nuclear hormone receptor family member nhr-48
chrX	15849355	15849699	345	*	0	.	59.3543	-1	3.65715	172	Promoter	6	15849900	15851567	1668	1	181671	NM_078205	-201	WBGene00010339	acl-1	Putative 1-acyl-sn-glycerol-3-phosphate acyltransferase acl-1
chrX	17151217	17151561	345	*	0	.	31.9366	-1	3.65715	172	Promoter	6	17151523	17154473	2951	1	181755	NM_078377	0	WBGene00007011	mdt-1.2	Mediator of RNA polymerase II transcription subunit 1.2
