# Supplementary material for: Self-sperm induce resistance to the detrimental effects of sexual encounters with males in hermaphroditic nematodes
Source: eLife. 2019 Jul 8;8:e46418. doi: 10.7554/eLife.46418 (PMC6697445; doi:10.7554/eLife.46418)
Supplement: Figure 4—source data 2. [file elife-46418-fig4-data2.xlsx]

## Sheet: Description
Output from GO enrichment using DEseq2 results and CEH-18 binding peaks as input
MAB-5 binding peaks and DESeq2 results were used as a control
Each tab/sheet has the complete GO enrichment results for the differentially expressed genes for a given comparison and direction
The differentially expressed genes have been subset by the presence of a CEH-18 ChIP-seq binding peak
For each differential expression comparison, there are two tabs/sheets (one for each direction of expression)
The experimental conditions are abbreviated in the following way:
1. the first letter is the genotype
	F = fem-1[q17]
	N = WT, N2
2. The number is the day that the mating occur
	** Note: the samples were collected 24 hours after mating so the ages of the worms at the time of collection are 1 day older (day 4 or 8 of life)
	3 = for mated C. elegans, mating occurred on day 3; animals frozen for RNA extraction on day 4 of life)
	7 = for mated C. elegans, mating occurred on day 7; animals frozen for RNA extraction on day 8 of life)
3. The last letter is whether or not the animal was mated
	M = C. elegans were mated on the day indicated (with him-5 males labeled with MitoTracker Red CMXRos) and only animals that received male sperm were used
	U = C. elegans never interacted with males but were cultured at the same density as mated animals
Example:
F3M up vs. N3M is the GO enrichment for genes that are more highly expressed by fem-1 feminized hermaphrodites that were mated on day 3 of life compared to N2 hermaphrodites that were mated on day 3 of life

## Sheet: N3UvF3U-N3Uup-withCEH18peak
	p.values	FDR.BH	genes
GO.0009792..embryo.development.ending.in.birth.or.egg.hatching	3.63813e-15	1.93476e-11	cmd-1, unc-62, Y57E12AL.6, hpo-9, clic-1, plrg-1, emo-1, myo-3, tomm-20, mrpl-49, R186.8, rpoa-12, F13C5.2, trap-2, ife-4, snx-1, gyg-1, aps-2, unc-97, asg-2, tni-1, pat-6, rpl-15, pcn-1, ubc-9, eif-1.A, hil-7, ruvb-2, his-62, cec-5, rsp-6, ric-3, F08B4.7, C33D9.13, mppb-1, mrpl-51, C01B12.8, egl-26, mrpl-28, sco-1, ntl-2, unc-85, pbs-3, dsh-1, ndx-6, phb-2, F58F12.1, hel-1, iff-2, atad-3, rpb-11…
GO.0002119..nematode.larval.development	1.58034e-13	4.20213e-10	unc-62, B0238.11, Y57E12AL.6, hpo-9, plrg-1, emo-1, myo-3, tomm-20, mrpl-49, rpoa-12, rpl-38, F13C5.2, snx-1, gyg-1, aps-2, unc-97, hsp-3, eor-2, pat-6, rps-24, rpl-15, rps-28, ubc-9, ruvb-2, his-62, rsp-6, ric-3, mrpl-51, coq-3, egl-26, mrpl-28, sco-1, ntl-2, pbs-3, dsh-1, F58F12.1, hel-1, iff-2, atad-3, rsp-2, rpb-11, csk-1, icd-2, mrpl-15, epg-2, snr-7, pas-3, rps-17, cyc-1, cfim-1, rpl-14, F2…
GO.0000003..reproduction	4.83899e-12	8.57792e-09	sti-1, cmd-1, B0238.11, Y57E12AL.6, plrg-1, emo-1, myo-3, tomm-20, R186.8, rpoa-12, rpl-38, F13C5.2, snx-1, gyg-1, aps-2, hsp-3, asg-2, pat-6, rps-24, rpl-15, rps-28, pcn-1, ubc-9, eif-1.A, ruvb-2, rsp-6, F08B4.7, dpm-3, egl-26, sco-1, ntl-2, pbs-3, phb-2, F58F12.1, fust-1, hel-1, iff-2, atad-3, rpb-11, icd-2, chaf-2, eif-3.I, snr-7, pas-3, rps-17, cyc-1, cfim-1, rpl-14, eif-3.C, his-68, F25H2.4,…
GO.0006412..translation	4.92366e-11	6.546e-08	mrpl-49, rpl-38, ife-4, rps-24, rpl-15, rps-28, eif-1.A, mrpl-51, rpl-29, mrps-7, iff-2, mrpl-15, eif-3.I, rps-17, rpl-14, eif-3.C, eif-3.E, rps-14, rpl-21, ant-1.1, drr-2
GO.0003735..structural.constituent.of.ribosome	3.16724e-09	3.36868e-06	mrpl-49, R186.8, rpl-38, rps-24, rpl-15, rps-28, mrpl-51, rpl-29, mrps-7, mrpl-28, mrpl-15, rps-17, rpl-14, rps-14, rpl-21, ant-1.1
GO.0005840..ribosome	4.76177e-09	4.22051e-06	mrpl-49, rpl-38, rps-24, mrpl-55, rpl-15, rps-28, mrpl-51, rpl-29, mrps-7, mrpl-28, mrpl-15, rps-17, rpl-14, rps-14, rpl-21
GO.0030529..intracellular.ribonucleoprotein.complex	7.97787e-07	0.00060609	mrpl-49, rpl-38, rpl-15, rps-28, F08B4.7, mrpl-51, mrps-7, mrpl-15, snr-7, rps-17, rps-14, rpl-21
GO.0005515..protein.binding	4.1501e-06	0.00275878	sti-1, cmd-1, unc-62, sipa-1, tomm-20, swan-1, cyn-3, snx-1, inso-1, C02F12.8, unc-97, ain-1, pat-6, pcn-1, ubc-9, ruvb-2, alp-1, mppb-1, F49C12.9, ntl-2, pbs-3, dsh-1, icd-2, F25H2.4, F32B4.4, eva-1, kbp-4, sup-26, elb-1, Y56A3A.7, ant-1.1
GO.0055120..striated.muscle.dense.body	5.89204e-06	0.00348154	pfn-3, inso-1, gyg-1, unc-97, pat-6, alp-1, F25H2.4, set-18, eva-1
GO.0006915..apoptotic.process	6.84105e-06	0.00363807	R186.8, sav-1, rpl-15, rps-28, pcn-1, ubc-9, hel-1, atad-3, eif-3.I, snr-7, rps-17, eif-3.C, his-68, eif-3.E, Y54F10AR.1, cct-5, arf-1.2, rpl-21, vha-1, ant-1.1
GO.0005762..mitochondrial.large.ribosomal.subunit	7.77507e-06	0.00375889	mrpl-49, R186.8, mrpl-51, mrpl-28, mrpl-15
GO.0006898..receptor.mediated.endocytosis	1.41672e-05	0.00627841	cmd-1, B0238.11, myo-3, R186.8, rpoa-12, unc-97, eif-1.A, ruvb-2, F08B4.7, mrpl-51, sco-1, ntl-2, iff-2, atad-3, rpb-11, epg-2, snr-7, pas-3, F25H2.4, eif-3.E, swsn-3, snpc-3.4, cct-5, K12H4.5, vha-1
GO.0040035..hermaphrodite.genitalia.development	2.26128e-05	0.00925038	unc-62, B0238.11, rpl-38, C11H1.3, ubc-9, ruvb-2, his-62, sco-1, ntl-2, hel-1, iff-2, rpb-11, icd-2, pas-3, cyc-1, cfim-1, F25H2.4, eif-3.E, kbp-4, swsn-3, snpc-3.4, cct-5, arf-1.2, K12H4.5, elb-1
GO.0005739..mitochondrion	8.11866e-05	0.0308393	F21C10.10, tomm-20, mrpl-49, cyn-1, asg-2, mrpl-55, mrpl-51, mrps-7, acdh-9, phb-2, F58F12.1, atad-3, cyc-1, ddp-1, mtss-1, ant-1.1
GO.0003729..mRNA.binding	0.000102172	0.0362232	F08B4.7, mrps-7, lin-28, cfim-1, Y119D3B.12
GO.0040011..locomotion	0.000145956	0.0456584	unc-62, plrg-1, myo-3, F13C5.2, unc-1, unc-97, hsp-3, tni-1, C11H1.3, eor-2, ain-1, pat-6, unc-33, ubc-9, eif-1.A, ruvb-2, rsp-6, ric-3, alp-1, ntl-2, unc-85, pbs-3, iff-2, icd-2, snr-7, Y47G6A.18, pas-3, cfim-1, F25H2.4, pfn-1, sup-26, cct-5, arf-1.2, elb-1
GO.0007005..mitochondrion.organization	0.000138126	0.0456584	atad-3, ddp-1, arf-1.2, ant-1.1
GO.0005622..intracellular	0.000185157	0.0547036	mrpl-49, rpl-38, sav-1, K02E10.1, rps-24, rpl-15, rps-28, rpl-29, tpi-1, Y47G6A.18, rps-17, rpl-14, Y54F10AR.1, arf-1.2, rpl-21
GO.0003743..translation.initiation.factor.activity	0.000260982	0.0730474	ife-4, eif-1.A, eif-3.I, eif-3.C, eif-3.E
GO.0005743..mitochondrial.inner.membrane	0.00036712	0.0891091	coq-3, sco-1, phb-2, F58F12.1, atad-3, ddp-1, ant-1.1
GO.0000398..mRNA.splicing..via.spliceosome	0.000342801	0.0891091	plrg-1, rsp-6, F08B4.7, hel-1, rsp-2, snr-7
GO.0006413..translational.initiation	0.000368635	0.0891091	ife-4, eif-1.A, eif-3.I, eif-3.C, eif-3.E
GO.0022625..cytosolic.large.ribosomal.subunit	0.000411066	0.0950456	rpl-38, rpl-15, rpl-29, rpl-14, rpl-21
GO.0000028..ribosomal.small.subunit.assembly	0.000449664	0.0996381	mrps-7, rps-17, rps-14
GO.0005737..cytoplasm	0.000541521	0.109337	sti-1, Y57E12AL.6, myo-3, swan-1, F28C10.3, pfn-3, ife-4, snx-1, gyg-1, pix-1, ain-1, pat-6, unc-33, ubc-9, ruvb-2, pbs-3, iff-2, epg-2, eif-3.I, pas-3, lin-28, eif-3.C, F25H2.4, eif-3.E, pfn-1, tba-2, Y71H2AM.20, sup-26, cct-5, disl-2, ubc-7
GO.0016282..eukaryotic.43S.preinitiation.complex	0.000593186	0.109337	eif-3.I, eif-3.C, eif-3.E
GO.0006605..protein.targeting	0.000616794	0.109337	emo-1, tomm-20
GO.0042989..sequestering.of.actin.monomers	0.000616794	0.109337	pfn-3, pfn-1
GO.0022627..cytosolic.small.ribosomal.subunit	0.00057134	0.109337	rps-24, rps-28, rps-17, rps-14
GO.0004582..dolichyl.phosphate.beta.D.mannosyltransferase.activity	0.000616794	0.109337	H43I07.3, dpm-3
GO.0001731..formation.of.translation.preinitiation.complex	0.00076296	0.122952	eif-3.I, eif-3.C, eif-3.E
GO.0006446..regulation.of.translational.initiation	0.00076296	0.122952	eif-3.I, eif-3.C, eif-3.E
GO.0033290..eukaryotic.48S.preinitiation.complex	0.00076296	0.122952	eif-3.I, eif-3.C, eif-3.E
GO.0071004..U2.type.prespliceosome	0.000960744	0.150272	F08B4.7, snr-7, Y119D3B.12
GO.0008340..determination.of.adult.lifespan	0.00112244	0.170546	sti-1, unc-62, asg-2, C11H1.3, ain-1, pat-6, eif-1.A, F08B4.7, alp-1, F49C12.9, pbs-3, phb-2, hel-1, tpi-1, icd-2, Y47G6A.18, F13G3.10, cyc-1, set-18, Y71H2AM.20, K12H4.5, ant-1.1, drr-2
GO.0042645..mitochondrial.nucleoid	0.00122184	0.175615	atad-3, mtss-1
GO.0035269..protein.O.linked.mannosylation	0.00122184	0.175615	H43I07.3, dpm-3
GO.0005852..eukaryotic.translation.initiation.factor.3.complex	0.00144692	0.197301	eif-3.I, eif-3.C, eif-3.E
GO.0005685..U1.snRNP	0.00144692	0.197301	F08B4.7, snr-7, Y119D3B.12
GO.0003676..nucleic.acid.binding	0.00173496	0.230354	rpoa-12, egrh-1, rsp-6, F08B4.7, fust-1, hel-1, rsp-2, lin-28, ztf-6, F32B4.4, sup-26, F26F4.8, Y111B2A.10, drr-2
GO.0005783..endoplasmic.reticulum	0.00177596	0.230354	emo-1, trap-2, mans-3, hsp-3, uggt-1, ric-3, dpm-3, set-18, arf-1.2
GO.0015450..P.P.bond.hydrolysis.driven.protein.transmembrane.transporter.activity	0.00201703	0.249455	emo-1, tomm-20
GO.0003785..actin.monomer.binding	0.00201703	0.249455	pfn-3, pfn-1
GO.0003779..actin.binding	0.00261871	0.310255	myo-3, pfn-3, tni-1, pat-6, pfn-1
GO.0010171..body.morphogenesis	0.00262532	0.310255	unc-62, myo-3, aps-2, unc-97, hsp-3, tni-1, C11H1.3, mrpl-28, unc-85, dsh-1, phb-2, hel-1, icd-2, Y47G6A.18, rps-17, swsn-3, elb-1
GO.0008406..gonad.development	0.00294721	0.340723	hsp-3, rps-28, eif-1.A, ruvb-2, rsp-6, phb-2, rsp-2, icd-2, tba-2, cct-5, rpl-21, ubc-7
GO.0008380..RNA.splicing	0.00365074	0.413077	rsp-6, hel-1, rsp-2, snr-7
GO.0005789..endoplasmic.reticulum.membrane	0.00476502	0.527925	H43I07.3, emo-1, trap-2, K02E10.1, ric-3, dpm-3
GO.0048477..oogenesis	0.00512981	0.556741	unc-62, emo-1, R186.8, pcn-1, phb-2, rpb-11, rps-17, eif-3.E
GO.0005634..nucleus	0.00555453	0.568057	tag-304, unc-62, Y57E12AL.6, rpoa-12, unc-97, eor-2, egrh-1, ubxn-2, zip-11, pcn-1, ubc-9, ruvb-2, cec-5, rsp-6, F08B4.7, ntl-2, unc-85, pbs-3, hel-1, rsp-2, rpb-11, chaf-2, snr-7, pas-3, F22D6.2, ceh-5, his-68, eif-3.E, Y71H2AM.20, F26F4.8, C07H6.2, cec-1
GO.0006754..ATP.biosynthetic.process	0.00548838	0.568057	asg-2, F58F12.1
GO.0071944..cell.periphery	0.00548838	0.568057	cmd-1, pix-1
GO.0031430..M.band	0.00672579	0.650323	unc-97, pat-6, eva-1
GO.0000413..protein.peptidyl.prolyl.isomerization	0.00672579	0.650323	cyn-1, cyn-3, Y71H2AM.20
GO.0003755..peptidyl.prolyl.cis.trans.isomerase.activity	0.00672579	0.650323	cyn-1, cyn-3, Y71H2AM.20
GO.0003723..RNA.binding	0.00722777	0.68638	rpl-38, ife-4, eif-1.A, rsp-6, F08B4.7, hel-1, iff-2, rsp-2, snr-7, disl-2
GO.0005911..cell.cell.junction	0.00865446	0.807446	unc-1, csk-1
GO.0000166..nucleotide.binding	0.011485	0.852074	myo-3, F28C10.3, K02E10.1, hsp-3, madd-3, rps-24, ubc-9, ruvb-2, rsp-6, klp-11, fust-1, hel-1, atad-3, rsp-2, csk-1, F32B4.4, tba-2, sup-26, cct-5, arf-1.2, ubc-7, drr-2
GO.0018996..molting.cycle..collagen.and.cuticulin.based.cuticle	0.0143095	0.852074	plrg-1, emo-1, C11H1.3, rpl-15, rps-28, atad-3, icd-2, rpl-14, rps-14
GO.0000932..cytoplasmic.mRNA.processing.body	0.00990903	0.852074	ain-1, ntl-2, disl-2
GO.1904748..regulation.of.apoptotic.process.involved.in.development	0.0144425	0.852074	arf-1.2
GO.0015629..actin.cytoskeleton	0.0145804	0.852074	pfn-3, pfn-1
GO.0045335..phagocytic.vesicle	0.0145804	0.852074	snx-1, lmp-1
GO.0008425..2.polyprenyl.6.methoxy.1.4.benzoquinone.methyltransferase.activity	0.0144425	0.852074	coq-3
GO.0030016..myofibril	0.0124547	0.852074	myo-3, tpi-1
GO.0030536..larval.feeding.behavior	0.0144425	0.852074	csk-1
GO.0016853..isomerase.activity	0.0103541	0.852074	cyn-1, cyn-3, tpi-1, Y71H2AM.20
GO.0071806..protein.transmembrane.transport	0.0144425	0.852074	emo-1
GO.0070878..primary.miRNA.binding	0.0144425	0.852074	lin-28
GO.0070883..pre.miRNA.binding	0.0144425	0.852074	lin-28
GO.1990715..mRNA.CDS.binding	0.0144425	0.852074	lin-28
GO.2000635..negative.regulation.of.primary.miRNA.processing	0.0144425	0.852074	lin-28
GO.0030337..DNA.polymerase.processivity.factor.activity	0.0144425	0.852074	pcn-1
GO.0043626..PCNA.complex	0.0144425	0.852074	pcn-1
GO.0004865..protein.serine.threonine.phosphatase.inhibitor.activity	0.0144425	0.852074	C07H6.2
GO.0031554..regulation.of.DNA.templated.transcription..termination	0.0144425	0.852074	rsp-6
GO.0005862..muscle.thin.filament.tropomyosin	0.0144425	0.852074	tni-1
GO.0004807..triose.phosphate.isomerase.activity	0.0144425	0.852074	tpi-1
GO.0046166..glyceraldehyde.3.phosphate.biosynthetic.process	0.0144425	0.852074	tpi-1
GO.0032093..SAM.domain.binding	0.0144425	0.852074	ubc-9
GO.0061656..SUMO.conjugating.enzyme.activity	0.0144425	0.852074	ubc-9
GO.0008466..glycogenin.glucosyltransferase.activity	0.0144425	0.852074	gyg-1
GO.0006363..termination.of.RNA.polymerase.I.transcription	0.0144425	0.852074	rpoa-12
GO.0033185..dolichol.phosphate.mannose.synthase.complex	0.0144425	0.852074	dpm-3
GO.0032515..negative.regulation.of.phosphoprotein.phosphatase.activity	0.0144425	0.852074	C07H6.2
GO.1990074..polyuridylation.dependent.mRNA.catabolic.process	0.0144425	0.852074	disl-2
GO.0030125..clathrin.vesicle.coat	0.0144425	0.852074	clic-1
GO.0008160..protein.tyrosine.phosphatase.activator.activity	0.0144425	0.852074	Y71H2AM.20
GO.0019211..phosphatase.activator.activity	0.0144425	0.852074	Y71H2AM.20
GO.0030472..mitotic.spindle.organization.in.nucleus	0.0144425	0.852074	Y71H2AM.20
GO.0008599..protein.phosphatase.type.1.regulator.activity	0.0144425	0.852074	ubxn-2
GO.0006886..intracellular.protein.transport	0.015508	0.896427	clic-1, emo-1, tomm-20, K02E10.1, arf-1.2
GO.0015992..proton.transport	0.0160824	0.919634	asg-2, F58F12.1, vha-1
GO.0006334..nucleosome.assembly	0.0168504	0.923817	hil-7, chaf-2
GO.0004298..threonine.type.endopeptidase.activity	0.0168504	0.923817	pbs-3, pas-3
GO.0005839..proteasome.core.complex	0.0168504	0.923817	pbs-3, pas-3
GO.0002181..cytoplasmic.translation	0.0168504	0.923817	rpl-15, rpl-29
GO.0006397..mRNA.processing	0.0176041	0.955295	rsp-6, hel-1, rsp-2, snr-7
GO.0015031..protein.transport	0.0179917	0.966462	emo-1, tomm-20, K02E10.1, aps-2, icd-2, ddp-1, arf-1.2
GO.0005623..cell	0.0535338	1	emo-1, cyn-3, aps-2
GO.0005942..phosphatidylinositol.3.kinase.complex	1	1	NA
GO.0008286..insulin.receptor.signaling.pathway	1	1	NA
GO.0016301..kinase.activity	0.791394	1	F28C10.3, pix-1, csk-1
GO.0016310..phosphorylation	0.81715	1	F28C10.3, pix-1, csk-1
GO.0019901..protein.kinase.binding	1	1	NA
GO.0035014..phosphatidylinositol.3.kinase.regulator.activity	1	1	NA
GO.0040024..dauer.larval.development	1	1	NA
GO.0043551..regulation.of.phosphatidylinositol.3.kinase.activity	1	1	NA
GO.0046854..phosphatidylinositol.phosphorylation	1	1	NA
GO.0046935..1.phosphatidylinositol.3.kinase.regulator.activity	1	1	NA
GO.0003333..amino.acid.transmembrane.transport	1	1	NA
GO.0005886..plasma.membrane	0.989107	1	K02E10.1, csk-1
GO.0015171..amino.acid.transmembrane.transporter.activity	1	1	NA
GO.0015179..L.amino.acid.transmembrane.transporter.activity	1	1	NA
GO.0015297..antiporter.activity	1	1	NA
GO.0015807..L.amino.acid.transport	1	1	NA
GO.0016020..membrane	0.990169	1	H43I07.3, F44E7.9, emo-1, tomm-20, trap-2, ZC13.1, sms-2, unc-1, C05D9.7, K02E10.1, aps-2, mans-3, lmp-1, asg-2, C34D10.1, F40B5.2, phf-31, C03A3.1, erv-46, inx-18, C17H12.10, C08G9.1, ric-3, C26B2.7, klp-11, dpm-3, col-130, sco-1, phb-2, K10B2.4, F58F12.1, C01G6.2, atad-3, eva-1, ddp-1, vha-1, ant-1.1
GO.0016021..integral.component.of.membrane	0.996602	1	H43I07.3, F44E7.9, emo-1, tomm-20, trap-2, ZC13.1, sms-2, unc-1, C05D9.7, mans-3, lmp-1, C34D10.1, F40B5.2, phf-31, C03A3.1, erv-46, inx-18, C17H12.10, C08G9.1, ric-3, C26B2.7, klp-11, dpm-3, col-130, sco-1, phb-2, K10B2.4, C01G6.2, atad-3, eva-1, vha-1, ant-1.1
GO.1902475..L.alpha.amino.acid.transmembrane.transport	1	1	NA
GO.1990184..amino.acid.transport.complex	1	1	NA
GO.0019915..lipid.storage	0.509768	1	unc-62, unc-97, ric-3, ntl-2, phb-2, icd-2, ztf-6
GO.0009986..cell.surface	1	1	NA
GO.0000278..mitotic.cell.cycle	1	1	NA
GO.0040025..vulval.development	0.0693437	1	ain-1, ubc-9, egl-26, lin-28
GO.0040026..positive.regulation.of.vulval.development	0.6009	1	rsp-6
GO.0005576..extracellular.region	1	1	NA
GO.0098542..defense.response.to.other.organism	1	1	NA
GO.0003674..molecular_function	0.896417	1	rps-14
GO.0006952..defense.response	1	1	NA
GO.0031640..killing.of.cells.of.other.organism	1	1	NA
GO.0042742..defense.response.to.bacterium	1	1	NA
GO.0050829..defense.response.to.Gram.negative.bacterium	1	1	NA
GO.0050830..defense.response.to.Gram.positive.bacterium	1	1	NA
GO.0050832..defense.response.to.fungus	1	1	NA
GO.0000077..DNA.damage.checkpoint	1	1	NA
GO.0004672..protein.kinase.activity	0.815403	1	F28C10.3, madd-3, csk-1
GO.0004713..protein.tyrosine.kinase.activity	0.564336	1	csk-1
GO.0004715..non.membrane.spanning.protein.tyrosine.kinase.activity	0.325076	1	csk-1
GO.0005102..receptor.binding	1	1	NA
GO.0005524..ATP.binding	0.417721	1	myo-3, F28C10.3, hsp-3, madd-3, ubc-9, ruvb-2, klp-11, hel-1, atad-3, csk-1, cct-5, ubc-7
GO.0006468..protein.phosphorylation	0.852174	1	F28C10.3, madd-3, csk-1
GO.0007169..transmembrane.receptor.protein.tyrosine.kinase.signaling.pathway	1	1	NA
GO.0007283..spermatogenesis	0.132608	1	phb-2, rsp-2
GO.0010212..response.to.ionizing.radiation	1	1	NA
GO.0016740..transferase.activity	0.934318	1	F28C10.3, sms-2, gyg-1, uggt-1, csk-1, ubc-7
GO.0030154..cell.differentiation	0.376655	1	emo-1, rsp-6, rsp-2
GO.0030336..negative.regulation.of.cell.migration	0.0565363	1	swan-1
GO.0031234..extrinsic.component.of.cytoplasmic.side.of.plasma.membrane	1	1	NA
GO.0038083..peptidyl.tyrosine.autophosphorylation	1	1	NA
GO.0042127..regulation.of.cell.proliferation	0.501456	1	sav-1, smr-1
GO.0043066..negative.regulation.of.apoptotic.process	1	1	NA
GO.0043518..negative.regulation.of.DNA.damage.response..signal.transduction.by.p53.class.mediator	1	1	NA
GO.0045087..innate.immune.response	0.972555	1	F22H10.2
GO.1901075..negative.regulation.of.engulfment.of.apoptotic.cell	1	1	NA
GO.0005215..transporter.activity	0.764322	1	ant-1.1
GO.0006810..transport	0.292018	1	emo-1, tomm-20, aps-2, asg-2, inx-18, F58F12.1, icd-2, ddp-1, Y54F10AR.1, arf-1.2, vha-1, ant-1.1
GO.0006869..lipid.transport	1	1	NA
GO.0008152..metabolic.process	0.795584	1	myo-3, C01G10.7, mans-3, F40B5.2, unc-33, klp-11, acdh-9, ndx-6, tpi-1, tba-2, Y71H2AM.20
GO.0016246..RNA.interference	0.147301	1	ruvb-2, snr-7, cfim-1, K12H4.5
GO.0016887..ATPase.activity	0.409953	1	hsp-3, klp-11
GO.0042626..ATPase.activity..coupled.to.transmembrane.movement.of.substances	1	1	NA
GO.0043231..intracellular.membrane.bounded.organelle	0.774457	1	ric-3
GO.0055085..transmembrane.transport	0.995181	1	ant-1.1
GO.0040020..regulation.of.meiotic.nuclear.division	0.688736	1	smr-1
GO.0030176..integral.component.of.endoplasmic.reticulum.membrane	1	1	NA
GO.0030968..endoplasmic.reticulum.unfolded.protein.response	0.0391227	1	hsp-3, uggt-1, phb-2
GO.0060465..pharynx.development	1	1	NA
GO.0001507..acetylcholine.catabolic.process.in.synaptic.cleft	1	1	NA
GO.0003990..acetylcholinesterase.activity	1	1	NA
GO.0004104..cholinesterase.activity	1	1	NA
GO.0005615..extracellular.space	0.948936	1	ttr-17
GO.0006581..acetylcholine.catabolic.process	1	1	NA
GO.0016787..hydrolase.activity	0.509457	1	mans-3, F40B5.2, unc-33, ruvb-2, pbs-3, ndx-6, hel-1, pas-3, cfim-1, disl-2
GO.0030054..cell.junction	0.111989	1	inso-1, unc-97, inx-18, eva-1
GO.0040012..regulation.of.locomotion	1	1	NA
GO.0042135..neurotransmitter.catabolic.process	1	1	NA
GO.0042802..identical.protein.binding	0.583017	1	cfim-1
GO.0043083..synaptic.cleft	1	1	NA
GO.0045202..synapse	1	1	NA
GO.0052689..carboxylic.ester.hydrolase.activity	1	1	NA
GO.0007271..synaptic.transmission..cholinergic	0.570654	1	ric-3
GO.0042803..protein.homodimerization.activity	1	1	NA
GO.0035188..hatching	0.52444	1	rpb-11
GO.0043058..regulation.of.backward.locomotion	1	1	NA
GO.0046983..protein.dimerization.activity	0.449711	1	rpb-11
GO.0050879..multicellular.organismal.movement	1	1	NA
GO.0006508..proteolysis	0.804626	1	mppb-1, pbs-3, pas-3
GO.0008237..metallopeptidase.activity	1	1	NA
GO.0008241..peptidyl.dipeptidase.activity	1	1	NA
GO.0018991..oviposition	0.0344523	1	unc-62, tni-1, ain-1, ubc-9, egl-26, unc-85, cyc-1, lin-28, elb-1
GO.0040018..positive.regulation.of.multicellular.organism.growth	0.324325	1	rpl-15, eif-1.A, dpm-3, ntl-2, phb-2, rps-17
GO.0003994..aconitate.hydratase.activity	1	1	NA
GO.0005829..cytosol	0.228239	1	ubxn-2, dsh-1, tpi-1, gsr-1
GO.0006099..tricarboxylic.acid.cycle	1	1	NA
GO.0006879..cellular.iron.ion.homeostasis	1	1	NA
GO.0016829..lyase.activity	1	1	NA
GO.0046872..metal.ion.binding	0.0756667	1	cmd-1, C01G10.7, ZC13.1, gyg-1, unc-97, F40B5.2, phf-31, tni-1, C11H1.3, egrh-1, F08B4.7, alp-1, mppb-1, sco-1, ndx-6, csk-1, F22D6.2, lin-28, set-18, ddp-1, F26F4.8, disl-2, Y111B2A.10
GO.0051536..iron.sulfur.cluster.binding	1	1	NA
GO.0051539..4.iron..4.sulfur.cluster.binding	1	1	NA
GO.0072350..tricarboxylic.acid.metabolic.process	1	1	NA
GO.0004889..acetylcholine.activated.cation.selective.channel.activity	1	1	NA
GO.0005216..ion.channel.activity	1	1	NA
GO.0005230..extracellular.ligand.gated.ion.channel.activity	1	1	NA
GO.0005231..excitatory.extracellular.ligand.gated.ion.channel.activity	1	1	NA
GO.0005892..acetylcholine.gated.channel.complex	1	1	NA
GO.0006811..ion.transport	0.589779	1	asg-2, inx-18, F58F12.1, vha-1
GO.0007274..neuromuscular.synaptic.transmission	1	1	NA
GO.0015464..acetylcholine.receptor.activity	1	1	NA
GO.0035094..response.to.nicotine	1	1	NA
GO.0042166..acetylcholine.binding	1	1	NA
GO.0043005..neuron.projection	0.246846	1	unc-33, ric-3
GO.0045211..postsynaptic.membrane	1	1	NA
GO.0051932..synaptic.transmission..GABAergic	1	1	NA
GO.0098655..cation.transmembrane.transport	1	1	NA
GO.0098662..inorganic.cation.transmembrane.transport	1	1	NA
GO.0098703..calcium.ion.import.across.plasma.membrane	1	1	NA
GO.0034220..ion.transmembrane.transport	1	1	NA
GO.0007268..chemical.synaptic.transmission	1	1	NA
GO.0042995..cell.projection	1	1	NA
GO.0000281..mitotic.cytokinesis	1	1	NA
GO.0000910..cytokinesis	0.488432	1	pfn-1
GO.0005200..structural.constituent.of.cytoskeleton	0.263408	1	tba-2
GO.0005856..cytoskeleton	0.163613	1	pfn-3, pat-6, pfn-1, tba-2
GO.0007517..muscle.organ.development	0.207759	1	unc-97
GO.0030036..actin.cytoskeleton.organization	1	1	NA
GO.0030866..cortical.actin.cytoskeleton.organization	1	1	NA
GO.0040007..growth	0.195081	1	aps-2, ntl-2, epg-2, K12H4.5
GO.0040039..inductive.cell.migration	0.30953	1	pix-1, icd-2, tba-2
GO.0071688..striated.muscle.myosin.thick.filament.assembly	0.134226	1	inso-1, pat-6, C33D9.13, tpi-1
GO.0005884..actin.filament	1	1	NA
GO.0005938..cell.cortex	0.321749	1	pfn-3, pfn-1
GO.0007111..meiosis.II.cytokinesis	1	1	NA
GO.0005865..striated.muscle.thin.filament	1	1	NA
GO.0045121..membrane.raft	0.52444	1	vha-1
GO.0030033..microvillus.assembly	1	1	NA
GO.0035148..tube.formation	1	1	NA
GO.0097516..microvillar.actin.bundle	1	1	NA
GO.1990357..terminal.web	1	1	NA
GO.0004016..adenylate.cyclase.activity	1	1	NA
GO.0006171..cAMP.biosynthetic.process	1	1	NA
GO.0006935..chemotaxis	1	1	NA
GO.0007188..adenylate.cyclase.modulating.G.protein.coupled.receptor.signaling.pathway	1	1	NA
GO.0007189..adenylate.cyclase.activating.G.protein.coupled.receptor.signaling.pathway	1	1	NA
GO.0007193..adenylate.cyclase.inhibiting.G.protein.coupled.receptor.signaling.pathway	1	1	NA
GO.0007614..short.term.memory	1	1	NA
GO.0008219..cell.death	1	1	NA
GO.0009190..cyclic.nucleotide.biosynthetic.process	1	1	NA
GO.0016849..phosphorus.oxygen.lyase.activity	1	1	NA
GO.0019933..cAMP.mediated.signaling	1	1	NA
GO.0030431..sleep	1	1	NA
GO.0035556..intracellular.signal.transduction	0.506019	1	F28C10.3, dsh-1
GO.0040013..negative.regulation.of.locomotion	1	1	NA
GO.0040017..positive.regulation.of.locomotion	1	1	NA
GO.0072375..medium.term.memory	1	1	NA
GO.0004383..guanylate.cyclase.activity	1	1	NA
GO.0006182..cGMP.biosynthetic.process	1	1	NA
GO.0007165..signal.transduction	0.982921	1	K02E10.1
GO.0008294..calcium..and.calmodulin.responsive.adenylate.cyclase.activity	1	1	NA
GO.0090038..negative.regulation.of.protein.kinase.C.signaling	1	1	NA
GO.2000114..regulation.of.establishment.of.cell.polarity	1	1	NA
GO.0007186..G.protein.coupled.receptor.signaling.pathway	1	1	NA
GO.1900195..positive.regulation.of.oocyte.maturation	1	1	NA
GO.0007613..memory	1	1	NA
GO.0007616..long.term.memory	1	1	NA
GO.0014069..postsynaptic.density	1	1	NA
GO.0051015..actin.filament.binding	1	1	NA
GO.0051016..barbed.end.actin.filament.capping	1	1	NA
GO.0097120..receptor.localization.to.synapse	1	1	NA
GO.2000249..regulation.of.actin.cytoskeleton.reorganization	1	1	NA
GO.0004222..metalloendopeptidase.activity	0.702104	1	mppb-1
GO.0007229..integrin.mediated.signaling.pathway	0.109891	1	calm-1
GO.0008233..peptidase.activity	0.750454	1	pbs-3, pas-3
GO.0022401..negative.adaptation.of.signaling.pathway	1	1	NA
GO.0046959..habituation	1	1	NA
GO.0004000..adenosine.deaminase.activity	1	1	NA
GO.0006382..adenosine.to.inosine.editing	1	1	NA
GO.0006396..RNA.processing	1	1	NA
GO.0022626..cytosolic.ribosome	1	1	NA
GO.0003824..catalytic.activity	0.870015	1	C01G10.7, mppb-1, tpi-1
GO.0005777..peroxisome	1	1	NA
GO.0006629..lipid.metabolic.process	0.921688	1	sms-2
GO.0008609..alkylglycerone.phosphate.synthase.activity	1	1	NA
GO.0008610..lipid.biosynthetic.process	1	1	NA
GO.0008611..ether.lipid.biosynthetic.process	1	1	NA
GO.0016491..oxidoreductase.activity	0.939723	1	acdh-9, Y39G8B.2, gsr-1
GO.0016614..oxidoreductase.activity..acting.on.CH.OH.group.of.donors	1	1	NA
GO.0050660..flavin.adenine.dinucleotide.binding	0.183255	1	acdh-9, gsr-1
GO.0055114..oxidation.reduction.process	0.977363	1	acdh-9, Y39G8B.2, gsr-1
GO.0071949..FAD.binding	1	1	NA
GO.0008270..zinc.ion.binding	0.351754	1	rpoa-12, ZC13.1, unc-97, phf-31, C11H1.3, F08B4.7, alp-1, fust-1, F22D6.2, lin-28
GO.0008361..regulation.of.cell.size	1	1	NA
GO.0030199..collagen.fibril.organization	1	1	NA
GO.0043652..engulfment.of.apoptotic.cell	1	1	NA
GO.0004871..signal.transducer.activity	1	1	NA
GO.0014057..positive.regulation.of.acetylcholine.secretion..neurotransmission	1	1	NA
GO.0016079..synaptic.vesicle.exocytosis	1	1	NA
GO.0030163..protein.catabolic.process	0.0449155	1	unc-62, unc-97, pat-6, egl-26, unc-85
GO.0030421..defecation	0.480911	1	phb-2
GO.0035418..protein.localization.to.synapse	1	1	NA
GO.0060179..male.mating.behavior	1	1	NA
GO.0004930..G.protein.coupled.receptor.activity	1	1	NA
GO.0007218..neuropeptide.signaling.pathway	1	1	NA
GO.0008188..neuropeptide.receptor.activity	1	1	NA
GO.2000294..positive.regulation.of.defecation	1	1	NA
GO.0005085..guanyl.nucleotide.exchange.factor.activity	1	1	NA
GO.0007618..mating	1	1	NA
GO.0017112..Rab.guanyl.nucleotide.exchange.factor.activity	1	1	NA
GO.0043547..positive.regulation.of.GTPase.activity	0.39475	1	sipa-1, pix-1
GO.0004252..serine.type.endopeptidase.activity	1	1	NA
GO.0003924..GTPase.activity	0.459212	1	K02E10.1, tba-2
GO.0005525..GTP.binding	0.461265	1	K02E10.1, tba-2, arf-1.2
GO.0006913..nucleocytoplasmic.transport	0.408075	1	K02E10.1
GO.0007264..small.GTPase.mediated.signal.transduction	0.311111	1	K02E10.1, arf-1.2
GO.0008021..synaptic.vesicle	1	1	NA
GO.0030141..secretory.granule	1	1	NA
GO.0032402..melanosome.transport	1	1	NA
GO.0042470..melanosome	1	1	NA
GO.0045921..positive.regulation.of.exocytosis	1	1	NA
GO.0090522..vesicle.tethering.involved.in.exocytosis	1	1	NA
GO.1903364..positive.regulation.of.cellular.protein.catabolic.process	1	1	NA
GO.1990504..dense.core.granule.exocytosis	1	1	NA
GO.0002250..adaptive.immune.response	1	1	NA
GO.0006954..inflammatory.response	1	1	NA
GO.0006979..response.to.oxidative.stress	0.517446	1	phb-2
GO.0007568..aging	1	1	NA
GO.0007611..learning.or.memory	1	1	NA
GO.0014065..phosphatidylinositol.3.kinase.signaling	1	1	NA
GO.0016303..1.phosphatidylinositol.3.kinase.activity	1	1	NA
GO.0016773..phosphotransferase.activity..alcohol.group.as.acceptor	1	1	NA
GO.0030168..platelet.activation	1	1	NA
GO.0031513..nonmotile.primary.cilium	0.51035	1	asg-2
GO.0035005..1.phosphatidylinositol.4.phosphate.3.kinase.activity	1	1	NA
GO.0036092..phosphatidylinositol.3.phosphate.biosynthetic.process	1	1	NA
GO.0043053..dauer.entry	1	1	NA
GO.0046686..response.to.cadmium.ion	1	1	NA
GO.0048015..phosphatidylinositol.mediated.signaling	1	1	NA
GO.0050919..negative.chemotaxis	1	1	NA
GO.0050920..regulation.of.chemotaxis	1	1	NA
GO.0060326..cell.chemotaxis	1	1	NA
GO.1901047..insulin.receptor.signaling.pathway.involved.in.determination.of.adult.lifespan	1	1	NA
GO.0001965..G.protein.alpha.subunit.binding	1	1	NA
GO.0005096..GTPase.activator.activity	0.488432	1	sipa-1
GO.0030695..GTPase.regulator.activity	1	1	NA
GO.0050790..regulation.of.catalytic.activity	0.219214	1	ubxn-2
GO.0060259..regulation.of.feeding.behavior	1	1	NA
GO.0003684..damaged.DNA.binding	1	1	NA
GO.0003908..methylated.DNA..protein..cysteine.S.methyltransferase.activity	1	1	NA
GO.0006281..DNA.repair	0.332347	1	ruvb-2, his-68
GO.0006307..DNA.dealkylation.involved.in.DNA.repair	1	1	NA
GO.0016765..transferase.activity..transferring.alkyl.or.aryl..other.than.methyl..groups	1	1	NA
GO.0032259..methylation	0.710697	1	coq-3
GO.0001085..RNA.polymerase.II.transcription.factor.binding	0.284563	1	ubc-9
GO.0001708..cell.fate.specification	0.157539	1	eor-2, lin-28
GO.0003677..DNA.binding	0.15581	1	unc-62, rpoa-12, zip-11, pcn-1, hil-7, his-62, F22D6.2, lin-28, ceh-5, his-68, cec-1, mtss-1
GO.0003700..transcription.factor.activity..sequence.specific.DNA.binding	0.962072	1	zip-11, F26F4.8
GO.0005667..transcription.factor.complex	0.344468	1	hel-1
GO.0006351..transcription..DNA.templated	0.633798	1	rpoa-12, ruvb-2, unc-85, rpb-11, C16C10.4, F26F4.8
GO.0006355..regulation.of.transcription..DNA.templated	0.403411	1	unc-62, zip-11, ruvb-2, ntl-2, unc-85, lin-28, his-68, C16C10.4, F26F4.8
GO.0006366..transcription.from.RNA.polymerase.II.promoter	0.517446	1	rpb-11
GO.0007275..multicellular.organism.development	0.147627	1	sti-1, unc-62, emo-1, ubc-9, rsp-6, rsp-2, lin-28, ceh-5
GO.0009410..response.to.xenobiotic.stimulus	1	1	NA
GO.0022008..neurogenesis	1	1	NA
GO.0030522..intracellular.receptor.signaling.pathway	1	1	NA
GO.0035176..social.behavior	1	1	NA
GO.0043565..sequence.specific.DNA.binding	0.985057	1	zip-11
GO.0045944..positive.regulation.of.transcription.from.RNA.polymerase.II.promoter	0.854755	1	F28C10.3
GO.0090575..RNA.polymerase.II.transcription.factor.complex	1	1	NA
GO.0004874..aryl.hydrocarbon.receptor.activity	1	1	NA
GO.0007399..nervous.system.development	1	1	NA
GO.0007416..synapse.assembly	1	1	NA
GO.0007610..behavior	1	1	NA
GO.0034753..nuclear.aryl.hydrocarbon.receptor.complex	1	1	NA
GO.0046685..response.to.arsenic.containing.substance	1	1	NA
GO.0071218..cellular.response.to.misfolded.protein	1	1	NA
GO.0000235..astral.microtubule	1	1	NA
GO.0000780..condensed.nuclear.chromosome..centromeric.region	1	1	NA
GO.0000794..condensed.nuclear.chromosome	1	1	NA
GO.0005813..centrosome	0.544823	1	cmd-1
GO.0005828..kinetochore.microtubule	1	1	NA
GO.0007020..microtubule.nucleation	1	1	NA
GO.0007049..cell.cycle	1	1	NA
GO.0031616..spindle.pole.centrosome	1	1	NA
GO.0032133..chromosome.passenger.complex	1	1	NA
GO.0032465..regulation.of.cytokinesis	0.0701661	1	tba-2
GO.0035174..histone.serine.kinase.activity	1	1	NA
GO.0035404..histone.serine.phosphorylation	1	1	NA
GO.0040002..collagen.and.cuticulin.based.cuticle.development	1	1	NA
GO.0051233..spindle.midzone	1	1	NA
GO.0090307..mitotic.spindle.assembly	1	1	NA
GO.1904781..positive.regulation.of.protein.localization.to.centrosome	1	1	NA
GO.0000793..condensed.chromosome	1	1	NA
GO.0004674..protein.serine.threonine.kinase.activity	0.951864	1	F28C10.3
GO.0005694..chromosome	0.311111	1	his-68, cec-1
GO.0005819..spindle	1	1	NA
GO.0005876..spindle.microtubule	1	1	NA
GO.0007059..chromosome.segregation	1	1	NA
GO.0007067..mitotic.nuclear.division	0.41498	1	C33D9.13, tba-2
GO.0007126..meiotic.nuclear.division	0.468779	1	hpo-9, snx-1
GO.0007281..germ.cell.development	0.237524	1	hsp-3, rps-28, tba-2, smr-1
GO.0016568..chromatin.modification	0.167745	1	ruvb-2, unc-85
GO.0018105..peptidyl.serine.phosphorylation	1	1	NA
GO.0018107..peptidyl.threonine.phosphorylation	1	1	NA
GO.0019894..kinesin.binding	1	1	NA
GO.0030261..chromosome.condensation	1	1	NA
GO.0030496..midbody	1	1	NA
GO.0031991..regulation.of.actomyosin.contractile.ring.contraction	1	1	NA
GO.0045184..establishment.of.protein.localization	1	1	NA
GO.0046777..protein.autophosphorylation	1	1	NA
GO.0051117..ATPase.binding	1	1	NA
GO.0051256..mitotic.spindle.midzone.assembly	1	1	NA
GO.0051301..cell.division	1	1	NA
GO.0051321..meiotic.cell.cycle	1	1	NA
GO.0005913..cell.cell.adherens.junction	0.172381	1	pix-1
GO.0008092..cytoskeletal.protein.binding	1	1	NA
GO.0016327..apicolateral.plasma.membrane	1	1	NA
GO.0040027..negative.regulation.of.vulval.development	0.340523	1	C11H1.3, ubc-9, rpb-11, snr-7
GO.0043296..apical.junction.complex	1	1	NA
GO.0044292..dendrite.terminus	1	1	NA
GO.0045216..cell.cell.junction.organization	0.0286774	1	unc-97
GO.0032266..phosphatidylinositol.3.phosphate.binding	1	1	NA
GO.0002376..immune.system.process	1	1	NA
GO.0005516..calmodulin.binding	1	1	NA
GO.0042771..intrinsic.apoptotic.signaling.pathway.in.response.to.DNA.damage.by.p53.class.mediator	1	1	NA
GO.0043025..neuronal.cell.body	0.816309	1	ric-3
GO.0003725..double.stranded.RNA.binding	1	1	NA
GO.0003727..single.stranded.RNA.binding	1	1	NA
GO.0016892..endoribonuclease.activity..producing.3.phosphomonoesters	1	1	NA
GO.0035068..micro.ribonucleoprotein.complex	1	1	NA
GO.0035196..production.of.miRNAs.involved.in.gene.silencing.by.miRNA	1	1	NA
GO.0035198..miRNA.binding	1	1	NA
GO.0035279..mRNA.cleavage.involved.in.gene.silencing.by.miRNA	1	1	NA
GO.0070551..endoribonuclease.activity..cleaving.siRNA.paired.mRNA	1	1	NA
GO.0070922..small.RNA.loading.onto.RISC	1	1	NA
GO.0090502..RNA.phosphodiester.bond.hydrolysis..endonucleolytic	1	1	NA
GO.0004029..aldehyde.dehydrogenase..NAD..activity	1	1	NA
GO.0016620..oxidoreductase.activity..acting.on.the.aldehyde.or.oxo.group.of.donors..NAD.or.NADP.as.acceptor	1	1	NA
GO.0048871..multicellular.organismal.homeostasis	1	1	NA
GO.0006730..one.carbon.metabolic.process	1	1	NA
GO.0009058..biosynthetic.process	1	1	NA
GO.0009258..10.formyltetrahydrofolate.catabolic.process	1	1	NA
GO.0016155..formyltetrahydrofolate.dehydrogenase.activity	1	1	NA
GO.0016742..hydroxymethyl...formyl..and.related.transferase.activity	1	1	NA
GO.0019145..aminobutyraldehyde.dehydrogenase.activity	1	1	NA
GO.0047105..4.trimethylammoniobutyraldehyde.dehydrogenase.activity	1	1	NA
GO.0004028..3.chloroallyl.aldehyde.dehydrogenase.activity	1	1	NA
GO.0004030..aldehyde.dehydrogenase..NAD.P....activity	1	1	NA
GO.0006081..cellular.aldehyde.metabolic.process	1	1	NA
GO.0003842..1.pyrroline.5.carboxylate.dehydrogenase.activity	1	1	NA
GO.0006537..glutamate.biosynthetic.process	1	1	NA
GO.0006561..proline.biosynthetic.process	1	1	NA
GO.0032502..developmental.process	0.325076	1	unc-62
GO.0004777..succinate.semialdehyde.dehydrogenase..NAD...activity	1	1	NA
GO.0009013..succinate.semialdehyde.dehydrogenase..NAD.P....activity	1	1	NA
GO.0000062..fatty.acyl.CoA.binding	0.353955	1	acdh-9
GO.0004491..methylmalonate.semialdehyde.dehydrogenase..acylating..activity	1	1	NA
GO.0006573..valine.metabolic.process	1	1	NA
GO.0018478..malonate.semialdehyde.dehydrogenase..acetylating..activity	1	1	NA
GO.0019859..thymine.metabolic.process	1	1	NA
GO.0005575..cellular_component	0.780972	1	rps-14
GO.0001055..RNA.polymerase.II.activity	0.122754	1	rpb-11
GO.0003899..DNA.directed.RNA.polymerase.activity	0.0693449	1	rpoa-12, rpb-11
GO.0005665..DNA.directed.RNA.polymerase.II..core.complex	0.184345	1	rpb-11
GO.0006479..protein.methylation	1	1	NA
GO.0007052..mitotic.spindle.organization	0.225464	1	epg-2, tba-2
GO.0007369..gastrulation	1	1	NA
GO.0008356..asymmetric.cell.division	1	1	NA
GO.0010458..exit.from.mitosis	1	1	NA
GO.0016779..nucleotidyltransferase.activity	1	1	NA
GO.0042789..mRNA.transcription.from.RNA.polymerase.II.promoter	1	1	NA
GO.0005887..integral.component.of.plasma.membrane	1	1	NA
GO.0006995..cellular.response.to.nitrogen.starvation	1	1	NA
GO.0008519..ammonium.transmembrane.transporter.activity	1	1	NA
GO.0015695..organic.cation.transport	1	1	NA
GO.0015696..ammonium.transport	1	1	NA
GO.0019740..nitrogen.utilization	1	1	NA
GO.0072488..ammonium.transmembrane.transport	1	1	NA
GO.0034648..histone.demethylase.activity..H3.dimethyl.K4.specific.	1	1	NA
GO.0034720..histone.H3.K4.demethylation	1	1	NA
GO.0005635..nuclear.envelope	0.425093	1	ubc-9
GO.0005640..nuclear.outer.membrane	1	1	NA
GO.0007010..cytoskeleton.organization	1	1	NA
GO.0035046..pronuclear.migration	0.183255	1	atad-3, tba-2
GO.0051087..chaperone.binding	1	1	NA
GO.0051179..localization	1	1	NA
GO.0002143..tRNA.wobble.position.uridine.thiolation	1	1	NA
GO.0004792..thiosulfate.sulfurtransferase.activity	1	1	NA
GO.0008641..small.protein.activating.enzyme.activity	1	1	NA
GO.0016874..ligase.activity	0.818984	1	ubc-9
GO.0016925..protein.sumoylation	0.0836	1	ubc-9
GO.0018117..protein.adenylylation	1	1	NA
GO.0019948..SUMO.activating.enzyme.activity	1	1	NA
GO.0031510..SUMO.activating.enzyme.complex	1	1	NA
GO.0032447..protein.urmylation	1	1	NA
GO.0042292..URM1.activating.enzyme.activity	1	1	NA
GO.0070733..protein.adenylyltransferase.activity	1	1	NA
GO.0005680..anaphase.promoting.complex	1	1	NA
GO.0006511..ubiquitin.dependent.protein.catabolic.process	0.188471	1	pas-3, ubc-7
GO.0031625..ubiquitin.protein.ligase.binding	0.0861846	1	ubc-9, ubc-7
GO.0042787..protein.ubiquitination.involved.in.ubiquitin.dependent.protein.catabolic.process	1	1	NA
GO.0061630..ubiquitin.protein.ligase.activity	0.204235	1	ubc-9, ubc-7
GO.0004842..ubiquitin.protein.transferase.activity	0.589064	1	C11H1.3
GO.0008054..negative.regulation.of.cyclin.dependent.protein.serine.threonine.kinase.by.cyclin.degradation	1	1	NA
GO.0045132..meiotic.chromosome.segregation	0.262351	1	hpo-9, cec-5, icd-2
GO.0045842..positive.regulation.of.mitotic.metaphase.anaphase.transition	1	1	NA
GO.0097602..cullin.family.protein.binding	1	1	NA
GO.0002039..p53.binding	1	1	NA
GO.0007219..Notch.signaling.pathway	1	1	NA
GO.0016485..protein.processing	1	1	NA
GO.0034394..protein.localization.to.cell.surface	0.0427077	1	ric-3
GO.0043085..positive.regulation.of.catalytic.activity	0.147927	1	Y71H2AM.20
GO.0045165..cell.fate.commitment	1	1	NA
GO.0048598..embryonic.morphogenesis	1	1	NA
GO.0048599..oocyte.development	0.284563	1	arf-1.2
GO.0060581..cell.fate.commitment.involved.in.pattern.specification	1	1	NA
GO.0070765..gamma.secretase.complex	1	1	NA
GO.0005768..endosome	1	1	NA
GO.0005769..early.endosome	0.294913	1	snx-1
GO.0008201..heparin.binding	1	1	NA
GO.0031410..cytoplasmic.vesicle	0.531334	1	C11H1.3
GO.0042395..ecdysis..collagen.and.cuticulin.based.cuticle	0.109891	1	gsr-1
GO.0046914..transition.metal.ion.binding	1	1	NA
GO.0009306..protein.secretion	0.241631	1	tomm-20
GO.0016192..vesicle.mediated.transport	0.268297	1	clic-1, arf-1.2
GO.0030131..clathrin.adaptor.complex	1	1	NA
GO.0045176..apical.protein.localization	1	1	NA
GO.0003906..DNA..apurinic.or.apyrimidinic.site..lyase.activity	1	1	NA
GO.0006284..base.excision.repair	1	1	NA
GO.0006974..cellular.response.to.DNA.damage.stimulus	0.492251	1	ruvb-2, hel-1
GO.0008081..phosphoric.diester.hydrolase.activity	1	1	NA
GO.0008311..double.stranded.DNA.3.5.exodeoxyribonuclease.activity	1	1	NA
GO.0017005..3.tyrosyl.DNA.phosphodiesterase.activity	1	1	NA
GO.0090305..nucleic.acid.phosphodiester.bond.hydrolysis	0.488432	1	disl-2
GO.0004177..aminopeptidase.activity	1	1	NA
GO.0001714..endodermal.cell.fate.specification	1	1	NA
GO.0005881..cytoplasmic.microtubule	1	1	NA
GO.0005912..adherens.junction	0.230504	1	unc-97
GO.0007026..negative.regulation.of.microtubule.depolymerization	1	1	NA
GO.0007389..pattern.specification.process	1	1	NA
GO.0007492..endoderm.development	1	1	NA
GO.0008013..beta.catenin.binding	1	1	NA
GO.0008283..cell.proliferation	1	1	NA
GO.0016055..Wnt.signaling.pathway	0.118134	1	eor-2, dsh-1
GO.0016476..regulation.of.embryonic.cell.shape	1	1	NA
GO.0016477..cell.migration	0.270162	1	cmd-1, unc-62, rpl-21
GO.0030177..positive.regulation.of.Wnt.signaling.pathway	1	1	NA
GO.0030178..negative.regulation.of.Wnt.signaling.pathway	1	1	NA
GO.0030334..regulation.of.cell.migration	1	1	NA
GO.0030877..beta.catenin.destruction.complex	1	1	NA
GO.0035414..negative.regulation.of.catenin.import.into.nucleus	1	1	NA
GO.0045295..gamma.catenin.binding	1	1	NA
GO.0045595..regulation.of.cell.differentiation	1	1	NA
GO.0045732..positive.regulation.of.protein.catabolic.process	1	1	NA
GO.0047485..protein.N.terminus.binding	1	1	NA
GO.0048666..neuron.development	1	1	NA
GO.0051782..negative.regulation.of.cell.division	1	1	NA
GO.0090090..negative.regulation.of.canonical.Wnt.signaling.pathway	1	1	NA
GO.0008565..protein.transporter.activity	0.315167	1	aps-2
GO.0030276..clathrin.binding	0.207759	1	aps-2
GO.0005794..Golgi.apparatus	0.831788	1	arf-1.2
GO.0030117..membrane.coat	1	1	NA
GO.0030121..AP.1.adaptor.complex	1	1	NA
GO.0030119..AP.type.membrane.coat.adaptor.complex	1	1	NA
GO.0008022..protein.C.terminus.binding	1	1	NA
GO.0008104..protein.localization	0.390556	1	tba-2
GO.0030139..endocytic.vesicle	1	1	NA
GO.0032794..GTPase.activating.protein.binding	1	1	NA
GO.0036062..presynaptic.periactive.zone	1	1	NA
GO.0045334..clathrin.coated.endocytic.vesicle	1	1	NA
GO.0007040..lysosome.organization	1	1	NA
GO.0030123..AP.3.adaptor.complex	1	1	NA
GO.0007154..cell.communication	1	1	NA
GO.0008595..anterior.posterior.axis.specification..embryo	1	1	NA
GO.0009880..embryonic.pattern.specification	1	1	NA
GO.0016331..morphogenesis.of.embryonic.epithelium	1	1	NA
GO.0040028..regulation.of.vulval.development	1	1	NA
GO.0046331..lateral.inhibition	1	1	NA
GO.0006833..water.transport	1	1	NA
GO.0015204..urea.transmembrane.transporter.activity	1	1	NA
GO.0015250..water.channel.activity	1	1	NA
GO.0015254..glycerol.channel.activity	1	1	NA
GO.0015793..glycerol.transport	1	1	NA
GO.0016323..basolateral.plasma.membrane	1	1	NA
GO.0022838..substrate.specific.channel.activity	1	1	NA
GO.0071918..urea.transmembrane.transport	1	1	NA
GO.0016324..apical.plasma.membrane	0.544823	1	egl-26
GO.0008150..biological_process	1	1	NA
GO.0016567..protein.ubiquitination	0.342898	1	C11H1.3, ubc-7
GO.0007276..gamete.generation	0.419985	1	iff-2, arf-1.2
GO.0048259..regulation.of.receptor.mediated.endocytosis	0.0286774	1	arf-1.2
GO.0032940..secretion.by.cell	1	1	NA
GO.0012505..endomembrane.system	1	1	NA
GO.0042059..negative.regulation.of.epidermal.growth.factor.receptor.signaling.pathway	1	1	NA
GO.0000226..microtubule.cytoskeleton.organization	1	1	NA
GO.0005764..lysosome	1	1	NA
GO.0008088..axo.dendritic.transport	1	1	NA
GO.0008333..endosome.to.lysosome.transport	1	1	NA
GO.0048786..presynaptic.active.zone	1	1	NA
GO.0005930..axoneme	1	1	NA
GO.0030425..dendrite	1	1	NA
GO.0046907..intracellular.transport	1	1	NA
GO.0032501..multicellular.organismal.process	1	1	NA
GO.0040010..positive.regulation.of.growth.rate	1	1	NA
GO.0050896..response.to.stimulus	1	1	NA
GO.0000049..tRNA.binding	1	1	NA
GO.0004812..aminoacyl.tRNA.ligase.activity	1	1	NA
GO.0004813..alanine.tRNA.ligase.activity	1	1	NA
GO.0006400..tRNA.modification	1	1	NA
GO.0006419..alanyl.tRNA.aminoacylation	1	1	NA
GO.0016597..amino.acid.binding	1	1	NA
GO.0016876..ligase.activity..forming.aminoacyl.tRNA.and.related.compounds	1	1	NA
GO.0043039..tRNA.aminoacylation	1	1	NA
GO.0006631..fatty.acid.metabolic.process	1	1	NA
GO.0006633..fatty.acid.biosynthetic.process	1	1	NA
GO.0016627..oxidoreductase.activity..acting.on.the.CH.CH.group.of.donors	0.353955	1	acdh-9
GO.0005885..Arp2.3.protein.complex	1	1	NA
GO.0007015..actin.filament.organization	1	1	NA
GO.0010631..epithelial.cell.migration	1	1	NA
GO.0031252..cell.leading.edge	1	1	NA
GO.0034314..Arp2.3.complex.mediated.actin.nucleation	1	1	NA
GO.0009790..embryo.development	1	1	NA
GO.0030833..regulation.of.actin.filament.polymerization	1	1	NA
GO.0000176..nuclear.exosome..RNase.complex.	0.147927	1	exos-8
GO.0000177..cytoplasmic.exosome..RNase.complex.	0.109891	1	exos-8
GO.0004527..exonuclease.activity	0.0537711	1	exos-8, disl-2
GO.0005730..nucleolus	0.746413	1	rpoa-12
GO.0016075..rRNA.catabolic.process	0.0701661	1	disl-2
GO.0031125..rRNA.3.end.processing	1	1	NA
GO.0034427..nuclear.transcribed.mRNA.catabolic.process..exonucleolytic..3.5	0.109891	1	exos-8
GO.0034475..U4.snRNA.3.end.processing	0.109891	1	exos-8
GO.0071028..nuclear.mRNA.surveillance	0.0836	1	exos-8
GO.0071051..polyadenylation.dependent.snoRNA.3.end.processing	1	1	NA
GO.0030041..actin.filament.polymerization	1	1	NA
GO.0000276..mitochondrial.proton.transporting.ATP.synthase.complex..coupling.factor.F.o.	0.0968407	1	asg-2
GO.0015078..hydrogen.ion.transmembrane.transporter.activity	0.036406	1	asg-2, vha-1
GO.0015986..ATP.synthesis.coupled.proton.transport	0.0332492	1	asg-2, F58F12.1
GO.0034606..response.to.hermaphrodite.contact	0.036406	1	asg-2, klp-11
GO.0046933..proton.transporting.ATP.synthase.activity..rotational.mechanism	0.135431	1	F58F12.1
GO.0003713..transcription.coactivator.activity	1	1	NA
GO.0045893..positive.regulation.of.transcription..DNA.templated	1	1	NA
GO.0031966..mitochondrial.membrane	0.0465238	1	asg-2, phb-2
GO.0045263..proton.transporting.ATP.synthase.complex..coupling.factor.F.o.	0.0565363	1	asg-2
GO.0004767..sphingomyelin.phosphodiesterase.activity	1	1	NA
GO.0006665..sphingolipid.metabolic.process	0.381604	1	sms-2
GO.0006685..sphingomyelin.catabolic.process	1	1	NA
GO.0016798..hydrolase.activity..acting.on.glycosyl.bonds	0.441624	1	mans-3
GO.0046513..ceramide.biosynthetic.process	1	1	NA
GO.0004190..aspartic.type.endopeptidase.activity	1	1	NA
GO.0098591..external.side.of.apical.plasma.membrane	1	1	NA
GO.0070265..necrotic.cell.death	1	1	NA
GO.0000122..negative.regulation.of.transcription.from.RNA.polymerase.II.promoter	0.60669	1	ubc-9
GO.0001012..RNA.polymerase.II.regulatory.region.DNA.binding	1	1	NA
GO.0001078..transcriptional.repressor.activity..RNA.polymerase.II.core.promoter.proximal.region.sequence.specific.binding	1	1	NA
GO.0007623..circadian.rhythm	1	1	NA
GO.0000977..RNA.polymerase.II.regulatory.region.sequence.specific.DNA.binding	1	1	NA
GO.0000981..RNA.polymerase.II.transcription.factor.activity..sequence.specific.DNA.binding	0.51035	1	F26F4.8
GO.0006357..regulation.of.transcription.from.RNA.polymerase.II.promoter	0.444678	1	zip-11, F26F4.8
GO.0031929..TOR.signaling	1	1	NA
GO.0006990..positive.regulation.of.transcription.from.RNA.polymerase.II.promoter.involved.in.unfolded.protein.response	1	1	NA
GO.0035966..response.to.topologically.incorrect.protein	1	1	NA
GO.1904576..response.to.tunicamycin	1	1	NA
GO.0045089..positive.regulation.of.innate.immune.response	1	1	NA
GO.0045824..negative.regulation.of.innate.immune.response	1	1	NA
GO.0051019..mitogen.activated.protein.kinase.binding	1	1	NA
GO.0005975..carbohydrate.metabolic.process	1	1	NA
GO.0043169..cation.binding	1	1	NA
GO.0000785..chromatin	1	1	NA
GO.0005929..cilium	1	1	NA
GO.0007617..mating.behavior	1	1	NA
GO.0015991..ATP.hydrolysis.coupled.proton.transport	0.294913	1	vha-1
GO.0016820..hydrolase.activity..acting.on.acid.anhydrides..catalyzing.transmembrane.movement.of.substances	1	1	NA
GO.0019904..protein.domain.specific.binding	0.353955	1	elb-1
GO.0033178..proton.transporting.two.sector.ATPase.complex..catalytic.domain	1	1	NA
GO.0043050..pharyngeal.pumping	0.0653249	1	alp-1, csk-1
GO.0045261..proton.transporting.ATP.synthase.complex..catalytic.core.F.1.	0.0701661	1	F58F12.1
GO.0046034..ATP.metabolic.process	1	1	NA
GO.0042776..mitochondrial.ATP.synthesis.coupled.proton.transport	0.0427077	1	cyc-1
GO.0010494..cytoplasmic.stress.granule	1	1	NA
GO.0010603..regulation.of.cytoplasmic.mRNA.processing.body.assembly	1	1	NA
GO.0034063..stress.granule.assembly	1	1	NA
GO.0040022..feminization.of.hermaphroditic.germ.line	1	1	NA
GO.0044822..poly.A..RNA.binding	1	1	NA
GO.0051729..germline.cell.cycle.switching..mitotic.to.meiotic.cell.cycle	1	1	NA
GO.0006821..chloride.transport	1	1	NA
GO.0008068..extracellular.glutamate.gated.chloride.channel.activity	1	1	NA
GO.0008144..drug.binding	1	1	NA
GO.0031987..locomotion.involved.in.locomotory.behavior	1	1	NA
GO.0042493..response.to.drug	0.184345	1	unc-1
GO.0043051..regulation.of.pharyngeal.pumping	0.399379	1	phb-2
GO.1902476..chloride.transmembrane.transport	1	1	NA
GO.0001508..action.potential	1	1	NA
GO.0000779..condensed.chromosome..centromeric.region	1	1	NA
GO.0003690..double.stranded.DNA.binding	1	1	NA
GO.0005654..nucleoplasm	0.449711	1	unc-97
GO.0006997..nucleus.organization	0.334842	1	his-68
GO.0010165..response.to.X.ray	1	1	NA
GO.0051276..chromosome.organization	1	1	NA
GO.0006457..protein.folding	0.118443	1	cyn-1, cyn-3, cct-5
GO.0016049..cell.growth	1	1	NA
GO.0002009..morphogenesis.of.an.epithelium	1	1	NA
GO.0007155..cell.adhesion	0.531334	1	pat-6
GO.0007265..Ras.protein.signal.transduction	0.122754	1	eor-2
GO.0008134..transcription.factor.binding	1	1	NA
GO.0016342..catenin.complex	1	1	NA
GO.0019903..protein.phosphatase.binding	1	1	NA
GO.0034333..adherens.junction.assembly	1	1	NA
GO.0034599..cellular.response.to.oxidative.stress	1	1	NA
GO.0042659..regulation.of.cell.fate.specification	1	1	NA
GO.0045294..alpha.catenin.binding	1	1	NA
GO.0045296..cadherin.binding	1	1	NA
GO.0048513..animal.organ.development	1	1	NA
GO.0006520..cellular.amino.acid.metabolic.process	1	1	NA
GO.0007606..sensory.perception.of.chemical.stimulus	1	1	NA
GO.0016831..carboxy.lyase.activity	1	1	NA
GO.0019752..carboxylic.acid.metabolic.process	1	1	NA
GO.0030170..pyridoxal.phosphate.binding	1	1	NA
GO.0034607..turning.behavior.involved.in.mating	1	1	NA
GO.0036468..L.dopa.decarboxylase.activity	1	1	NA
GO.0042416..dopamine.biosynthetic.process	1	1	NA
GO.0042427..serotonin.biosynthetic.process	1	1	NA
GO.0004497..monooxygenase.activity	1	1	NA
GO.0004505..phenylalanine.4.monooxygenase.activity	1	1	NA
GO.0004510..tryptophan.5.monooxygenase.activity	1	1	NA
GO.0005506..iron.ion.binding	1	1	NA
GO.0006559..L.phenylalanine.catabolic.process	1	1	NA
GO.0006569..tryptophan.catabolic.process	1	1	NA
GO.0006571..tyrosine.biosynthetic.process	1	1	NA
GO.0009072..aromatic.amino.acid.family.metabolic.process	1	1	NA
GO.0016714..oxidoreductase.activity..acting.on.paired.donors..with.incorporation.or.reduction.of.molecular.oxygen..reduced.pteridine.as.one.donor..and.incorporation.of.one.atom.of.oxygen	1	1	NA
GO.0042438..melanin.biosynthetic.process	1	1	NA
GO.0005113..patched.binding	1	1	NA
GO.0005119..smoothened.binding	1	1	NA
GO.0030030..cell.projection.organization	1	1	NA
GO.0034464..BBSome	1	1	NA
GO.0035058..nonmotile.primary.cilium.assembly	1	1	NA
GO.0035721..intraciliary.retrograde.transport	1	1	NA
GO.0036064..ciliary.basal.body	1	1	NA
GO.0061512..protein.localization.to.cilium	1	1	NA
GO.0031514..motile.cilium	1	1	NA
GO.1903441..protein.localization.to.ciliary.membrane	1	1	NA
GO.0005198..structural.molecule.activity	0.449711	1	clic-1
GO.0006890..retrograde.vesicle.mediated.transport..Golgi.to.ER	1	1	NA
GO.0008355..olfactory.learning	1	1	NA
GO.0042073..intraciliary.transport	1	1	NA
GO.0042384..cilium.assembly	1	1	NA
GO.0097546..ciliary.base	1	1	NA
GO.1904107..protein.localization.to.microvillus.membrane	1	1	NA
GO.0004089..carbonate.dehydratase.activity	1	1	NA
GO.0000045..autophagosome.assembly	1	1	NA
GO.0000407..pre.autophagosomal.structure	1	1	NA
GO.0006914..autophagy	0.408075	1	epg-2
GO.0009267..cellular.response.to.starvation	1	1	NA
GO.0012501..programmed.cell.death	1	1	NA
GO.0016023..cytoplasmic..membrane.bounded.vesicle	1	1	NA
GO.0032258..CVT.pathway	1	1	NA
GO.0034271..phosphatidylinositol.3.kinase.complex..class.III..type.I	1	1	NA
GO.0034272..phosphatidylinositol.3.kinase.complex..class.III..type.II	1	1	NA
GO.0040014..regulation.of.multicellular.organism.growth	1	1	NA
GO.0043277..apoptotic.cell.clearance	0.122754	1	cmd-1
GO.0044804..nucleophagy	1	1	NA
GO.0045138..nematode.male.tail.tip.morphogenesis	0.284385	1	eor-2, iff-2
GO.0045324..late.endosome.to.vacuole.transport	1	1	NA
GO.0005874..microtubule	0.246846	1	klp-11, tba-2
GO.0007017..microtubule.based.process	0.315167	1	tba-2
GO.0007635..chemosensory.behavior	1	1	NA
GO.0004869..cysteine.type.endopeptidase.inhibitor.activity	1	1	NA
GO.0009966..regulation.of.signal.transduction	1	1	NA
GO.0016573..histone.acetylation	1	1	NA
GO.1990001..inhibition.of.cysteine.type.endopeptidase.activity.involved.in.apoptotic.process	1	1	NA
GO.0005581..collagen.trimer	0.802333	1	col-130
GO.0042302..structural.constituent.of.cuticle	0.796451	1	col-130
GO.0042329..structural.constituent.of.collagen.and.cuticulin.based.cuticle	1	1	NA
GO.0060109..medial.layer.of.collagen.and.cuticulin.based.cuticle.extracellular.matrix	1	1	NA
GO.0030312..external.encapsulating.structure	1	1	NA
GO.0004601..peroxidase.activity	1	1	NA
GO.0016174..NAD.P.H.oxidase.activity	1	1	NA
GO.0018149..peptide.cross.linking	1	1	NA
GO.0020037..heme.binding	0.829302	1	cyc-1
GO.0040032..post.embryonic.body.morphogenesis	1	1	NA
GO.0042338..cuticle.development.involved.in.collagen.and.cuticulin.based.cuticle.molting.cycle	1	1	NA
GO.0042744..hydrogen.peroxide.catabolic.process	1	1	NA
GO.0098869..cellular.oxidant.detoxification	0.353955	1	gsr-1
GO.0008236..serine.type.peptidase.activity	1	1	NA
GO.0004867..serine.type.endopeptidase.inhibitor.activity	1	1	NA
GO.0010951..negative.regulation.of.endopeptidase.activity	1	1	NA
GO.0044254..multicellular.organismal.protein.catabolic.process	1	1	NA
GO.0000922..spindle.pole	1	1	NA
GO.0003777..microtubule.motor.activity	0.334842	1	klp-11
GO.0005871..kinesin.complex	0.274062	1	klp-11
GO.0007018..microtubule.based.movement	0.325076	1	klp-11
GO.0008017..microtubule.binding	0.408075	1	klp-11
GO.0008574..ATP.dependent.microtubule.motor.activity..plus.end.directed	1	1	NA
GO.1902845..negative.regulation.of.mitotic.spindle.elongation	1	1	NA
GO.0004077..biotin..acetyl.CoA.carboxylase..ligase.activity	1	1	NA
GO.0006464..cellular.protein.modification.process	1	1	NA
GO.0003682..chromatin.binding	1	1	NA
GO.0003712..transcription.cofactor.activity	1	1	NA
GO.0030424..axon	0.816309	1	unc-1
GO.0030512..negative.regulation.of.transforming.growth.factor.beta.receptor.signaling.pathway	1	1	NA
GO.0042393..histone.binding	0.135431	1	chaf-2
GO.0000724..double.strand.break.repair.via.homologous.recombination	1	1	NA
GO.0006289..nucleotide.excision.repair	1	1	NA
GO.0031436..BRCA1.BARD1.complex	1	1	NA
GO.0035066..positive.regulation.of.histone.acetylation	1	1	NA
GO.0035067..negative.regulation.of.histone.acetylation	1	1	NA
GO.0045717..negative.regulation.of.fatty.acid.biosynthetic.process	1	1	NA
GO.0051307..meiotic.chromosome.separation	1	1	NA
GO.0070531..BRCA1.A.complex	1	1	NA
GO.0071158..positive.regulation.of.cell.cycle.arrest	1	1	NA
GO.0008446..GDP.mannose.4.6.dehydratase.activity	1	1	NA
GO.0017085..response.to.insecticide	1	1	NA
GO.0019673..GDP.mannose.metabolic.process	1	1	NA
GO.0030017..sarcomere	0.241631	1	set-18
GO.0042350..GDP.L.fucose.biosynthetic.process	1	1	NA
GO.0042351..de.novo.GDP.L.fucose.biosynthetic.process	1	1	NA
GO.0075015..formation.of.infection.structure.on.or.near.host	1	1	NA
GO.0000139..Golgi.membrane	0.684149	1	K02E10.1
GO.0006486..protein.glycosylation	0.198963	1	uggt-1, dpm-3
GO.0008376..acetylgalactosaminyltransferase.activity	1	1	NA
GO.0008378..galactosyltransferase.activity	1	1	NA
GO.0016757..transferase.activity..transferring.glycosyl.groups	0.434869	1	gyg-1, uggt-1
GO.0006688..glycosphingolipid.biosynthetic.process	1	1	NA
GO.0019187..beta.1.4.mannosyltransferase.activity	1	1	NA
GO.0097502..mannosylation	1	1	NA
GO.0009636..response.to.toxic.substance	1	1	NA
GO.0033207..beta.1.4.N.acetylgalactosaminyltransferase.activity	1	1	NA
GO.0045747..positive.regulation.of.Notch.signaling.pathway	1	1	NA
GO.0016051..carbohydrate.biosynthetic.process	1	1	NA
GO.0000126..transcription.factor.TFIIIB.complex	1	1	NA
GO.0006352..DNA.templated.transcription..initiation	1	1	NA
GO.0006384..transcription.initiation.from.RNA.polymerase.III.promoter	1	1	NA
GO.0017025..TBP.class.protein.binding	1	1	NA
GO.0019827..stem.cell.population.maintenance	1	1	NA
GO.1903506..regulation.of.nucleic.acid.templated.transcription	1	1	NA
GO.0000775..chromosome..centromeric.region	1	1	NA
GO.0000776..kinetochore	1	1	NA
GO.0000777..condensed.chromosome.kinetochore	1	1	NA
GO.0007094..mitotic.spindle.assembly.checkpoint	1	1	NA
GO.0010940..positive.regulation.of.necrotic.cell.death	1	1	NA
GO.0044281..small.molecule.metabolic.process	1	1	NA
GO.0005509..calcium.ion.binding	0.372728	1	cmd-1, mans-3, calm-1
GO.0004714..transmembrane.receptor.protein.tyrosine.kinase.activity	1	1	NA
GO.0005109..frizzled.binding	0.109891	1	dsh-1
GO.0007411..axon.guidance	1	1	NA
GO.0017147..Wnt.protein.binding	1	1	NA
GO.0018108..peptidyl.tyrosine.phosphorylation	0.372521	1	csk-1
GO.0031594..neuromuscular.junction	1	1	NA
GO.0032809..neuronal.cell.body.membrane	1	1	NA
GO.0043204..perikaryon	1	1	NA
GO.0045200..establishment.of.neuroblast.polarity	1	1	NA
GO.0005869..dynactin.complex	1	1	NA
GO.0008290..F.actin.capping.protein.complex	1	1	NA
GO.0051693..actin.filament.capping	1	1	NA
GO.0000578..embryonic.axis.specification	1	1	NA
GO.0000902..cell.morphogenesis	0.147927	1	egl-26
GO.0010591..regulation.of.lamellipodium.assembly	1	1	NA
GO.0051490..negative.regulation.of.filopodium.assembly	1	1	NA
GO.0007631..feeding.behavior	1	1	NA
GO.0008504..monoamine.transmembrane.transporter.activity	1	1	NA
GO.0015844..monoamine.transport	1	1	NA
GO.0004511..tyrosine.3.monooxygenase.activity	1	1	NA
GO.0007638..mechanosensory.behavior	0.390556	1	snx-1
GO.0032094..response.to.food	1	1	NA
GO.0042136..neurotransmitter.biosynthetic.process	1	1	NA
GO.0042417..dopamine.metabolic.process	1	1	NA
GO.0042423..catecholamine.biosynthetic.process	1	1	NA
GO.0003934..GTP.cyclohydrolase.I.activity	1	1	NA
GO.0006729..tetrahydrobiopterin.biosynthetic.process	1	1	NA
GO.0035998..7.8.dihydroneopterin.3.triphosphate.biosynthetic.process	1	1	NA
GO.0046654..tetrahydrofolate.biosynthetic.process	1	1	NA
GO.0005901..caveola	1	1	NA
GO.0009898..cytoplasmic.side.of.plasma.membrane	1	1	NA
GO.0030133..transport.vesicle	1	1	NA
GO.0046662..regulation.of.oviposition	1	1	NA
GO.0048471..perinuclear.region.of.cytoplasm	0.246846	1	egrh-1, ubxn-2
GO.0060473..cortical.granule	1	1	NA
GO.0070836..caveola.assembly	1	1	NA
GO.0005319..lipid.transporter.activity	1	1	NA
GO.0007166..cell.surface.receptor.signaling.pathway	1	1	NA
GO.0007567..parturition	1	1	NA
GO.0004402..histone.acetyltransferase.activity	1	1	NA
GO.0004468..lysine.N.acetyltransferase.activity..acting.on.acetyl.phosphate.as.donor	1	1	NA
GO.0010975..regulation.of.neuron.projection.development	1	1	NA
GO.0016746..transferase.activity..transferring.acyl.groups	1	1	NA
GO.0018393..internal.peptidyl.lysine.acetylation	1	1	NA
GO.0043065..positive.regulation.of.apoptotic.process	0.241631	1	ant-1.1
GO.0061629..RNA.polymerase.II.sequence.specific.DNA.binding.transcription.factor.binding	1	1	NA
GO.0005244..voltage.gated.ion.channel.activity	1	1	NA
GO.0005245..voltage.gated.calcium.channel.activity	1	1	NA
GO.0005261..cation.channel.activity	1	1	NA
GO.0005262..calcium.channel.activity	1	1	NA
GO.0005891..voltage.gated.calcium.channel.complex	1	1	NA
GO.0006816..calcium.ion.transport	1	1	NA
GO.0008332..low.voltage.gated.calcium.channel.activity	1	1	NA
GO.0034765..regulation.of.ion.transmembrane.transport	1	1	NA
GO.0045760..positive.regulation.of.action.potential	1	1	NA
GO.0051899..membrane.depolarization	1	1	NA
GO.0070588..calcium.ion.transmembrane.transport	1	1	NA
GO.0086010..membrane.depolarization.during.action.potential	1	1	NA
GO.0007528..neuromuscular.junction.development	1	1	NA
GO.0008331..high.voltage.gated.calcium.channel.activity	1	1	NA
GO.0051924..regulation.of.calcium.ion.transport	1	1	NA
GO.0061199..striated.muscle.contraction.involved.in.embryonic.body.morphogenesis	0.0396733	1	myo-3, pat-6
GO.1901385..regulation.of.voltage.gated.calcium.channel.activity	1	1	NA
GO.0004518..nuclease.activity	0.399379	1	disl-2
GO.0004535..poly.A..specific.ribonuclease.activity	1	1	NA
GO.0006417..regulation.of.translation	0.334842	1	ife-4
GO.0017148..negative.regulation.of.translation	0.0244802	1	ntl-2, sup-26
GO.0030014..CCR4.NOT.complex	1	1	NA
GO.0030015..CCR4.NOT.core.complex	0.0836	1	ntl-2
GO.0031047..gene.silencing.by.RNA	1	1	NA
GO.0043186..P.granule	0.57688	1	snr-7
GO.0043928..exonucleolytic.nuclear.transcribed.mRNA.catabolic.process.involved.in.deadenylation.dependent.decay	0.0836	1	exos-8
GO.0090503..RNA.phosphodiester.bond.hydrolysis..exonucleolytic	0.0968407	1	disl-2
GO.0004129..cytochrome.c.oxidase.activity	1	1	NA
GO.0005740..mitochondrial.envelope	1	1	NA
GO.0016705..oxidoreductase.activity..acting.on.paired.donors..with.incorporation.or.reduction.of.molecular.oxygen	1	1	NA
GO.0010332..response.to.gamma.radiation	1	1	NA
GO.0005832..chaperonin.containing.T.complex	0.0427077	1	cct-5
GO.0051082..unfolded.protein.binding	0.381604	1	cct-5
GO.0006270..DNA.replication.initiation	1	1	NA
GO.0004721..phosphoprotein.phosphatase.activity	1	1	NA
GO.0004722..protein.serine.threonine.phosphatase.activity	1	1	NA
GO.0004725..protein.tyrosine.phosphatase.activity	1	1	NA
GO.0006470..protein.dephosphorylation	1	1	NA
GO.0007096..regulation.of.exit.from.mitosis	1	1	NA
GO.0008138..protein.tyrosine.serine.threonine.phosphatase.activity	1	1	NA
GO.0016311..dephosphorylation	1	1	NA
GO.0016791..phosphatase.activity	1	1	NA
GO.0035335..peptidyl.tyrosine.dephosphorylation	1	1	NA
GO.0040038..polar.body.extrusion.after.meiotic.divisions	1	1	NA
GO.0045786..negative.regulation.of.cell.cycle	1	1	NA
GO.0060284..regulation.of.cell.development	1	1	NA
GO.0071850..mitotic.cell.cycle.arrest	1	1	NA
GO.1990023..mitotic.spindle.midzone	1	1	NA
GO.0000087..mitotic.M.phase	1	1	NA
GO.0000212..meiotic.spindle.organization	1	1	NA
GO.0000132..establishment.of.mitotic.spindle.orientation	0.353955	1	tba-2
GO.0007163..establishment.or.maintenance.of.cell.polarity	1	1	NA
GO.0032970..regulation.of.actin.filament.based.process	1	1	NA
GO.0040001..establishment.of.mitotic.spindle.localization	1	1	NA
GO.0055037..recycling.endosome	1	1	NA
GO.0004126..cytidine.deaminase.activity	1	1	NA
GO.0006217..deoxycytidine.catabolic.process	1	1	NA
GO.0009451..RNA.modification	1	1	NA
GO.0009972..cytidine.deamination	1	1	NA
GO.0016070..RNA.metabolic.process	1	1	NA
GO.0047844..deoxycytidine.deaminase.activity	1	1	NA
GO.0005385..zinc.ion.transmembrane.transporter.activity	1	1	NA
GO.0006812..cation.transport	1	1	NA
GO.0006829..zinc.II.ion.transport	1	1	NA
GO.0008324..cation.transmembrane.transporter.activity	1	1	NA
GO.0010043..response.to.zinc.ion	1	1	NA
GO.0046579..positive.regulation.of.Ras.protein.signal.transduction	1	1	NA
GO.0061088..regulation.of.sequestering.of.zinc.ion	1	1	NA
GO.0071294..cellular.response.to.zinc.ion	1	1	NA
GO.0071577..zinc.II.ion.transmembrane.transport	1	1	NA
GO.0007156..homophilic.cell.adhesion.via.plasma.membrane.adhesion.molecules	1	1	NA
GO.0097402..neuroblast.migration	1	1	NA
GO.0008306..associative.learning	1	1	NA
GO.0001556..oocyte.maturation	1	1	NA
GO.0004693..cyclin.dependent.protein.serine.threonine.kinase.activity	1	1	NA
GO.0005815..microtubule.organizing.center	1	1	NA
GO.0008353..RNA.polymerase.II.carboxy.terminal.domain.kinase.activity	1	1	NA
GO.0032436..positive.regulation.of.proteasomal.ubiquitin.dependent.protein.catabolic.process	1	1	NA
GO.0045836..positive.regulation.of.meiotic.nuclear.division	1	1	NA
GO.0051446..positive.regulation.of.meiotic.cell.cycle	1	1	NA
GO.0071902..positive.regulation.of.protein.serine.threonine.kinase.activity	1	1	NA
GO.0007530..sex.determination	1	1	NA
GO.0008584..male.gonad.development	1	1	NA
GO.0009791..post.embryonic.development	0.230504	1	unc-85
GO.0032877..positive.regulation.of.DNA.endoreduplication	1	1	NA
GO.0044843..cell.cycle.G1.S.phase.transition	1	1	NA
GO.1900087..positive.regulation.of.G1.S.transition.of.mitotic.cell.cycle	1	1	NA
GO.0010468..regulation.of.gene.expression	0.294913	1	hel-1
GO.0030951..establishment.or.maintenance.of.microtubule.cytoskeleton.polarity	1	1	NA
GO.0032880..regulation.of.protein.localization	0.0575347	1	cmd-1, ain-1
GO.0048489..synaptic.vesicle.transport	1	1	NA
GO.0051222..positive.regulation.of.protein.transport	1	1	NA
GO.0051965..positive.regulation.of.synapse.assembly	1	1	NA
GO.1902803..regulation.of.synaptic.vesicle.transport	1	1	NA
GO.1904799..regulation.of.neuron.remodeling	1	1	NA
GO.1904810..negative.regulation.of.dense.core.granule.transport	1	1	NA
GO.1904811..positive.regulation.of.dense.core.granule.transport	1	1	NA
GO.2000331..regulation.of.terminal.button.organization	1	1	NA
GO.0005675..holo.TFIIH.complex	1	1	NA
GO.0009299..mRNA.transcription	1	1	NA
GO.0045448..mitotic.cell.cycle..embryonic	1	1	NA
GO.0051726..regulation.of.cell.cycle	0.241631	1	cmd-1
GO.0000082..G1.S.transition.of.mitotic.cell.cycle	1	1	NA
GO.0003730..mRNA.3.UTR.binding	0.0272822	1	lin-28, sup-26
GO.0007076..mitotic.chromosome.condensation	1	1	NA
GO.1990170..stress.response.to.cadmium.ion	1	1	NA
GO.0006260..DNA.replication	0.0410428	1	pcn-1, unc-85, mtss-1
GO.0001845..phagolysosome.assembly	1	1	NA
GO.0001891..phagocytic.cup	1	1	NA
GO.0005044..scavenger.receptor.activity	1	1	NA
GO.0030670..phagocytic.vesicle.membrane	1	1	NA
GO.0031260..pseudopodium.membrane	1	1	NA
GO.0031532..actin.cytoskeleton.reorganization	0.0701661	1	pat-6
GO.0034620..cellular.response.to.unfolded.protein	1	1	NA
GO.0043654..recognition.of.apoptotic.cell	1	1	NA
GO.0005070..SH3.SH2.adaptor.activity	1	1	NA
GO.0006909..phagocytosis	1	1	NA
GO.0009967..positive.regulation.of.signal.transduction	1	1	NA
GO.0032403..protein.complex.binding	1	1	NA
GO.0004175..endopeptidase.activity	0.263408	1	pas-3
GO.0004197..cysteine.type.endopeptidase.activity	1	1	NA
GO.0008234..cysteine.type.peptidase.activity	1	1	NA
GO.0016540..protein.autoprocessing	1	1	NA
GO.0030155..regulation.of.cell.adhesion	1	1	NA
GO.0042981..regulation.of.apoptotic.process	0.449711	1	cmd-1
GO.0097194..execution.phase.of.apoptosis	0.0968407	1	snx-1
GO.0097200..cysteine.type.endopeptidase.activity.involved.in.execution.phase.of.apoptosis	1	1	NA
GO.1902742..apoptotic.process.involved.in.development	1	1	NA
GO.0008635..activation.of.cysteine.type.endopeptidase.activity.involved.in.apoptotic.process.by.cytochrome.c	1	1	NA
GO.0008656..cysteine.type.endopeptidase.activator.activity.involved.in.apoptotic.process	1	1	NA
GO.0010954..positive.regulation.of.protein.processing	1	1	NA
GO.0016505..peptidase.activator.activity.involved.in.apoptotic.process	1	1	NA
GO.0043281..regulation.of.cysteine.type.endopeptidase.activity.involved.in.apoptotic.process	1	1	NA
GO.0043531..ADP.binding	1	1	NA
GO.0051432..BH1.domain.binding	1	1	NA
GO.0051434..BH3.domain.binding	1	1	NA
GO.0061133..endopeptidase.activator.activity	1	1	NA
GO.2001056..positive.regulation.of.cysteine.type.endopeptidase.activity	1	1	NA
GO.0017124..SH3.domain.binding	1	1	NA
GO.0019899..enzyme.binding	0.284563	1	lin-28
GO.0032045..guanyl.nucleotide.exchange.factor.complex	1	1	NA
GO.0005124..scavenger.receptor.binding	1	1	NA
GO.0045309..protein.phosphorylated.amino.acid.binding	1	1	NA
GO.0070782..phosphatidylserine.exposure.on.apoptotic.cell.surface	1	1	NA
GO.0000422..mitophagy	1	1	NA
GO.0005741..mitochondrial.outer.membrane	0.252599	1	tomm-20
GO.0008630..intrinsic.apoptotic.signaling.pathway.in.response.to.DNA.damage	1	1	NA
GO.0010636..positive.regulation.of.mitochondrial.fusion	1	1	NA
GO.0031090..organelle.membrane	1	1	NA
GO.0043069..negative.regulation.of.programmed.cell.death	1	1	NA
GO.0046982..protein.heterodimerization.activity	0.220139	1	his-62, his-68
GO.0097192..extrinsic.apoptotic.signaling.pathway.in.absence.of.ligand	1	1	NA
GO.2001243..negative.regulation.of.intrinsic.apoptotic.signaling.pathway	1	1	NA
GO.0001764..neuron.migration	0.0653249	1	pix-1, eor-2
GO.0008045..motor.neuron.axon.guidance	1	1	NA
GO.0010172..embryonic.body.morphogenesis	1	1	NA
GO.0031103..axon.regeneration	1	1	NA
GO.0033563..dorsal.ventral.axon.guidance	1	1	NA
GO.0048812..neuron.projection.morphogenesis	1	1	NA
GO.0048846..axon.extension.involved.in.axon.guidance	1	1	NA
GO.0050764..regulation.of.phagocytosis	1	1	NA
GO.0097628..distal.tip.cell.migration	1	1	NA
GO.0005547..phosphatidylinositol.3.4.5.trisphosphate.binding	0.0427077	1	snx-1
GO.0006911..phagocytosis..engulfment	1	1	NA
GO.0017048..Rho.GTPase.binding	1	1	NA
GO.0035262..gonad.morphogenesis	0.0613871	1	pix-1, iff-2
GO.0060097..cytoskeletal.rearrangement.involved.in.phagocytosis..engulfment	1	1	NA
GO.0070064..proline.rich.region.binding	1	1	NA
GO.0070273..phosphatidylinositol.4.phosphate.binding	0.0836	1	Y47G6A.18
GO.0080025..phosphatidylinositol.3.5.bisphosphate.binding	1	1	NA
GO.0051400..BH.domain.binding	1	1	NA
GO.0007588..excretion	1	1	NA
GO.0030104..water.homeostasis	1	1	NA
GO.0060290..transdifferentiation	1	1	NA
GO.1904081..positive.regulation.of.transcription.from.RNA.polymerase.II.promoter.involved.in.neuron.differentiation	1	1	NA
GO.0021520..spinal.cord.motor.neuron.cell.fate.specification	1	1	NA
GO.0007413..axonal.fasciculation	1	1	NA
GO.0016337..single.organismal.cell.cell.adhesion	1	1	NA
GO.0016358..dendrite.development	1	1	NA
GO.0016048..detection.of.temperature.stimulus	1	1	NA
GO.0030182..neuron.differentiation	1	1	NA
GO.0040040..thermosensory.behavior	1	1	NA
GO.0009957..epidermal.cell.fate.specification	1	1	NA
GO.0045026..plasma.membrane.fusion	1	1	NA
GO.0048859..formation.of.anatomical.boundary	1	1	NA
GO.0001228..transcriptional.activator.activity..RNA.polymerase.II.transcription.regulatory.region.sequence.specific.binding	1	1	NA
GO.0030516..regulation.of.axon.extension	0.109891	1	swan-1
GO.0008354..germ.cell.migration	1	1	NA
GO.0008544..epidermis.development	1	1	NA
GO.0030728..ovulation	0.0575347	1	emo-1, vha-1
GO.1900194..negative.regulation.of.oocyte.maturation	0.0836	1	egrh-1
GO.0001225..RNA.polymerase.II.transcription.coactivator.binding	1	1	NA
GO.0007498..mesoderm.development	1	1	NA
GO.0007501..mesodermal.cell.fate.specification	0.135431	1	unc-62
GO.0009786..regulation.of.asymmetric.cell.division	1	1	NA
GO.0009952..anterior.posterior.pattern.specification	0.147927	1	ubc-9
GO.0042692..muscle.cell.differentiation	0.0427077	1	unc-62
GO.0001077..transcriptional.activator.activity..RNA.polymerase.II.core.promoter.proximal.region.sequence.specific.binding	1	1	NA
GO.0043282..pharyngeal.muscle.development	0.0968407	1	ubc-9
GO.0034243..regulation.of.transcription.elongation.from.RNA.polymerase.II.promoter	1	1	NA
GO.0055007..cardiac.muscle.cell.differentiation	1	1	NA
GO.0050807..regulation.of.synapse.organization	1	1	NA
GO.0007548..sex.differentiation	0.284563	1	rsp-6
GO.0009888..tissue.development	1	1	NA
GO.0009886..post.embryonic.morphogenesis	1	1	NA
GO.0048665..neuron.fate.specification	1	1	NA
GO.0000723..telomere.maintenance	1	1	NA
GO.0000781..chromosome..telomeric.region	1	1	NA
GO.0000784..nuclear.chromosome..telomeric.region	1	1	NA
GO.0003691..double.stranded.telomeric.DNA.binding	1	1	NA
GO.0008301..DNA.binding..bending	1	1	NA
GO.0016233..telomere.capping	1	1	NA
GO.0032200..telomere.organization	1	1	NA
GO.0042048..olfactory.behavior	1	1	NA
GO.0042162..telomeric.DNA.binding	1	1	NA
GO.0007538..primary.sex.determination	1	1	NA
GO.0043073..germ.cell.nucleus	1	1	NA
GO.0006891..intra.Golgi.vesicle.mediated.transport	1	1	NA
GO.0030173..integral.component.of.Golgi.membrane	1	1	NA
GO.0006030..chitin.metabolic.process	1	1	NA
GO.0008061..chitin.binding	1	1	NA
GO.0030703..eggshell.formation	1	1	NA
GO.0004484..mRNA.guanylyltransferase.activity	1	1	NA
GO.0004651..polynucleotide.5.phosphatase.activity	1	1	NA
GO.0006370..7.methylguanosine.mRNA.capping	1	1	NA
GO.0010628..positive.regulation.of.gene.expression	0.315167	1	hel-1
GO.0098507..polynucleotide.5.dephosphorylation	1	1	NA
GO.0001666..response.to.hypoxia	1	1	NA
GO.0042594..response.to.starvation	1	1	NA
GO.0042770..signal.transduction.in.response.to.DNA.damage	1	1	NA
GO.0043068..positive.regulation.of.programmed.cell.death	1	1	NA
GO.0043021..ribonucleoprotein.complex.binding	1	1	NA
GO.0035567..non.canonical.Wnt.signaling.pathway	1	1	NA
GO.0042813..Wnt.activated.receptor.activity	1	1	NA
GO.0060070..canonical.Wnt.signaling.pathway	0.135431	1	dsh-1
GO.0003724..RNA.helicase.activity	1	1	NA
GO.0004004..ATP.dependent.RNA.helicase.activity	0.47328	1	hel-1
GO.0004386..helicase.activity	0.332347	1	ruvb-2, hel-1
GO.0010501..RNA.secondary.structure.unwinding	0.390556	1	hel-1
GO.0016071..mRNA.metabolic.process	1	1	NA
GO.0033962..cytoplasmic.mRNA.processing.body.assembly	1	1	NA
GO.0043229..intracellular.organelle	1	1	NA
GO.0003746..translation.elongation.factor.activity	0.219214	1	iff-2
GO.0006414..translational.elongation	0.219214	1	iff-2
GO.0004102..choline.O.acetyltransferase.activity	1	1	NA
GO.0008292..acetylcholine.biosynthetic.process	1	1	NA
GO.0060076..excitatory.synapse	1	1	NA
GO.0000118..histone.deacetylase.complex	1	1	NA
GO.0001709..cell.fate.determination	1	1	NA
GO.0003678..DNA.helicase.activity	0.172381	1	ruvb-2
GO.0006338..chromatin.remodeling	1	1	NA
GO.0016818..hydrolase.activity..acting.on.acid.anhydrides..in.phosphorus.containing.anhydrides	1	1	NA
GO.0032508..DNA.duplex.unwinding	0.334842	1	ruvb-2
GO.0046580..negative.regulation.of.Ras.protein.signal.transduction	1	1	NA
GO.0030992..intraciliary.transport.particle.B	1	1	NA
GO.0003774..motor.activity	0.294913	1	myo-3
GO.0030286..dynein.complex	1	1	NA
GO.0034608..vulval.location	0.196136	1	klp-11
GO.0051959..dynein.light.intermediate.chain.binding	1	1	NA
GO.0060170..ciliary.membrane	1	1	NA
GO.0061066..positive.regulation.of.dauer.larval.development	1	1	NA
GO.0005222..intracellular.cAMP.activated.cation.channel.activity	1	1	NA
GO.0005223..intracellular.cGMP.activated.cation.channel.activity	1	1	NA
GO.0005249..voltage.gated.potassium.channel.activity	1	1	NA
GO.0030553..cGMP.binding	1	1	NA
GO.0042391..regulation.of.membrane.potential	1	1	NA
GO.0071805..potassium.ion.transmembrane.transport	1	1	NA
GO.0005921..gap.junction	0.294913	1	inx-18
GO.0006972..hyperosmotic.response	1	1	NA
GO.0009408..response.to.heat	0.51035	1	sti-1
GO.0030991..intraciliary.transport.particle.A	1	1	NA
GO.0035720..intraciliary.anterograde.transport	1	1	NA
GO.0035869..ciliary.transition.zone	1	1	NA
GO.0007224..smoothened.signaling.pathway	1	1	NA
GO.0004100..chitin.synthase.activity	1	1	NA
GO.0016758..transferase.activity..transferring.hexosyl.groups	1	1	NA
GO.0033314..mitotic.DNA.replication.checkpoint	1	1	NA
GO.0051574..positive.regulation.of.histone.H3.K9.methylation	1	1	NA
GO.0000209..protein.polyubiquitination	0.425093	1	ubc-7
GO.0030544..Hsp70.protein.binding	0.0427077	1	sti-1
GO.0034450..ubiquitin.ubiquitin.ligase.activity	1	1	NA
GO.0045214..sarcomere.organization	1	1	NA
GO.0051865..protein.autoubiquitination	1	1	NA
GO.0006814..sodium.ion.transport	1	1	NA
GO.0015220..choline.transmembrane.transporter.activity	1	1	NA
GO.0015293..symporter.activity	1	1	NA
GO.0015871..choline.transport	1	1	NA
GO.0000272..polysaccharide.catabolic.process	1	1	NA
GO.0004553..hydrolase.activity..hydrolyzing.O.glycosyl.compounds	1	1	NA
GO.0004568..chitinase.activity	1	1	NA
GO.0006032..chitin.catabolic.process	1	1	NA
GO.0009620..response.to.fungus	1	1	NA
GO.0000307..cyclin.dependent.protein.kinase.holoenzyme.complex	1	1	NA
GO.0016538..cyclin.dependent.protein.serine.threonine.kinase.regulator.activity	1	1	NA
GO.0045737..positive.regulation.of.cyclin.dependent.protein.serine.threonine.kinase.activity	1	1	NA
GO.1901409..positive.regulation.of.phosphorylation.of.RNA.polymerase.II.C.terminal.domain	1	1	NA
GO.0004103..choline.kinase.activity	1	1	NA
GO.0006657..CDP.choline.pathway	1	1	NA
GO.0004305..ethanolamine.kinase.activity	1	1	NA
GO.0006646..phosphatidylethanolamine.biosynthetic.process	1	1	NA
GO.0006656..phosphatidylcholine.biosynthetic.process	1	1	NA
GO.0008654..phospholipid.biosynthetic.process	1	1	NA
GO.0004860..protein.kinase.inhibitor.activity	1	1	NA
GO.0004861..cyclin.dependent.protein.serine.threonine.kinase.inhibitor.activity	1	1	NA
GO.0007050..cell.cycle.arrest	1	1	NA
GO.0032875..regulation.of.DNA.endoreduplication	1	1	NA
GO.0045596..negative.regulation.of.cell.differentiation	1	1	NA
GO.0045605..negative.regulation.of.epidermal.cell.differentiation	1	1	NA
GO.0051302..regulation.of.cell.division	1	1	NA
GO.0071901..negative.regulation.of.protein.serine.threonine.kinase.activity	1	1	NA
GO.1902806..regulation.of.cell.cycle.G1.S.phase.transition	1	1	NA
GO.1904030..negative.regulation.of.cyclin.dependent.protein.kinase.activity	1	1	NA
GO.2000134..negative.regulation.of.G1.S.transition.of.mitotic.cell.cycle	1	1	NA
GO.0004683..calmodulin.dependent.protein.kinase.activity	1	1	NA
GO.0019722..calcium.mediated.signaling	1	1	NA
GO.0032793..positive.regulation.of.CREB.transcription.factor.activity	1	1	NA
GO.0045860..positive.regulation.of.protein.kinase.activity	1	1	NA
GO.0004003..ATP.dependent.DNA.helicase.activity	1	1	NA
GO.0006303..double.strand.break.repair.via.nonhomologous.end.joining	1	1	NA
GO.0006310..DNA.recombination	1	1	NA
GO.0043564..Ku70.Ku80.complex	1	1	NA
GO.0071480..cellular.response.to.gamma.radiation	1	1	NA
GO.0071481..cellular.response.to.X.ray	1	1	NA
GO.0016817..hydrolase.activity..acting.on.acid.anhydrides	1	1	NA
GO.0090136..epithelial.cell.cell.adhesion	1	1	NA
GO.0005604..basement.membrane	1	1	NA
GO.0031012..extracellular.matrix	1	1	NA
GO.0050808..synapse.organization	1	1	NA
GO.0005247..voltage.gated.chloride.channel.activity	1	1	NA
GO.1903959..regulation.of.anion.transmembrane.transport	1	1	NA
GO.0010466..negative.regulation.of.peptidase.activity	1	1	NA
GO.0030414..peptidase.inhibitor.activity	1	1	NA
GO.0000975..regulatory.region.DNA.binding	1	1	NA
GO.0001933..negative.regulation.of.protein.phosphorylation	1	1	NA
GO.0001934..positive.regulation.of.protein.phosphorylation	1	1	NA
GO.0006119..oxidative.phosphorylation	1	1	NA
GO.0006744..ubiquinone.biosynthetic.process	0.109891	1	coq-3
GO.0010629..negative.regulation.of.gene.expression	1	1	NA
GO.0030534..adult.behavior	1	1	NA
GO.0045333..cellular.respiration	1	1	NA
GO.0048520..positive.regulation.of.behavior	1	1	NA
GO.0051094..positive.regulation.of.developmental.process	1	1	NA
GO.0061063..positive.regulation.of.nematode.larval.development	1	1	NA
GO.1904808..positive.regulation.of.protein.oxidation	1	1	NA
GO.2000377..regulation.of.reactive.oxygen.species.metabolic.process	1	1	NA
GO.0009411..response.to.UV	1	1	NA
GO.0005765..lysosomal.membrane	0.252599	1	lmp-1
GO.0007034..vacuolar.transport	1	1	NA
GO.0015809..arginine.transport	1	1	NA
GO.0031301..integral.component.of.organelle.membrane	1	1	NA
GO.0051453..regulation.of.intracellular.pH	1	1	NA
GO.0004198..calcium.dependent.cysteine.type.endopeptidase.activity	1	1	NA
GO.0005001..transmembrane.receptor.protein.tyrosine.phosphatase.activity	1	1	NA
GO.0040037..negative.regulation.of.fibroblast.growth.factor.receptor.signaling.pathway	1	1	NA
GO.0016482..cytosolic.transport	1	1	NA
GO.0031134..sister.chromatid.biorientation	1	1	NA
GO.0051306..mitotic.sister.chromatid.separation	1	1	NA
GO.0072686..mitotic.spindle	0.147927	1	cmd-1
GO.0031965..nuclear.membrane	0.230504	1	cmd-1
GO.0051296..establishment.of.meiotic.spindle.orientation	0.0701661	1	cmd-1
GO.0045664..regulation.of.neuron.differentiation	1	1	NA
GO.0010754..negative.regulation.of.cGMP.mediated.signaling	1	1	NA
GO.0070482..response.to.oxygen.levels	1	1	NA
GO.0048609..multicellular.organismal.reproductive.process	1	1	NA
GO.2001235..positive.regulation.of.apoptotic.signaling.pathway	1	1	NA
GO.0055059..asymmetric.neuroblast.division	1	1	NA
GO.0060582..cell.fate.determination.involved.in.pattern.specification	1	1	NA
GO.0090630..activation.of.GTPase.activity	1	1	NA
GO.0030246..carbohydrate.binding	0.902337	1	eva-1
GO.0007368..determination.of.left.right.symmetry	1	1	NA
GO.0070491..repressing.transcription.factor.binding	1	1	NA
GO.0007030..Golgi.organization	0.135431	1	ubxn-2
GO.0017119..Golgi.transport.complex	1	1	NA
GO.0000228..nuclear.chromosome	1	1	NA
GO.0007130..synaptonemal.complex.assembly	1	1	NA
GO.0051177..meiotic.sister.chromatid.cohesion	1	1	NA
GO.0002164..larval.development	1	1	NA
GO.0060107..annuli.extracellular.matrix	1	1	NA
GO.0060111..alae.of.collagen.and.cuticulin.based.cuticle.extracellular.matrix	1	1	NA
GO.0006950..response.to.stress	0.230504	1	icd-2
GO.0008299..isoprenoid.biosynthetic.process	1	1	NA
GO.0031314..extrinsic.component.of.mitochondrial.inner.membrane	0.0565363	1	coq-3
GO.0002083..4.hydroxybenzoate.decaprenyltransferase.activity	1	1	NA
GO.0004659..prenyltransferase.activity	1	1	NA
GO.0047293..4.hydroxybenzoate.nonaprenyltransferase.activity	1	1	NA
GO.0008168..methyltransferase.activity	0.697713	1	coq-3
GO.0008757..S.adenosylmethionine.dependent.methyltransferase.activity	0.184345	1	coq-3
GO.0016709..oxidoreductase.activity..acting.on.paired.donors..with.incorporation.or.reduction.of.molecular.oxygen..NAD.P.H.as.one.donor..and.incorporation.of.one.atom.of.oxygen	1	1	NA
GO.0044550..secondary.metabolite.biosynthetic.process	1	1	NA
GO.0000900..translation.repressor.activity..nucleic.acid.binding	1	1	NA
GO.0008135..translation.factor.activity..RNA.binding	1	1	NA
GO.0043022..ribosome.binding	0.172381	1	iff-2
GO.1990124..messenger.ribonucleoprotein.complex	1	1	NA
GO.2000766..negative.regulation.of.cytoplasmic.translation	1	1	NA
GO.0005847..mRNA.cleavage.and.polyadenylation.specificity.factor.complex	1	1	NA
GO.0016607..nuclear.speck	1	1	NA
GO.0031124..mRNA.3.end.processing	1	1	NA
GO.0098789..pre.mRNA.cleavage.required.for.polyadenylation	1	1	NA
GO.0016810..hydrolase.activity..acting.on.carbon.nitrogen..but.not.peptide..bonds	0.172381	1	unc-33
GO.0019239..deaminase.activity	1	1	NA
GO.0031983..vesicle.lumen	1	1	NA
GO.0042718..yolk.granule	1	1	NA
GO.0051603..proteolysis.involved.in.cellular.protein.catabolic.process	0.127739	1	pbs-3, pas-3
GO.0000737..DNA.catabolic.process..endonucleolytic	1	1	NA
GO.0004519..endonuclease.activity	1	1	NA
GO.0004520..endodeoxyribonuclease.activity	1	1	NA
GO.0004521..endoribonuclease.activity	1	1	NA
GO.0006309..apoptotic.DNA.fragmentation	1	1	NA
GO.0006401..RNA.catabolic.process	1	1	NA
GO.0060102..collagen.and.cuticulin.based.cuticle.extracellular.matrix	1	1	NA
GO.0045177..apical.part.of.cell	1	1	NA
GO.0001223..transcription.coactivator.binding	1	1	NA
GO.0048256..flap.endonuclease.activity	1	1	NA
GO.0004536..deoxyribonuclease.activity	1	1	NA
GO.0016888..endodeoxyribonuclease.activity..producing.5.phosphomonoesters	1	1	NA
GO.0000178..exosome..RNase.complex.	1	1	NA
GO.0006139..nucleobase.containing.compound.metabolic.process	1	1	NA
GO.0008408..3.5.exonuclease.activity	1	1	NA
GO.0044237..cellular.metabolic.process	1	1	NA
GO.0000738..DNA.catabolic.process..exonucleolytic	1	1	NA
GO.0003697..single.stranded.DNA.binding	0.263408	1	mtss-1
GO.0004540..ribonuclease.activity	1	1	NA
GO.0090501..RNA.phosphodiester.bond.hydrolysis	1	1	NA
GO.0032077..positive.regulation.of.deoxyribonuclease.activity	1	1	NA
GO.0004531..deoxyribonuclease.II.activity	1	1	NA
GO.0006259..DNA.metabolic.process	1	1	NA
GO.0004817..cysteine.tRNA.ligase.activity	1	1	NA
GO.0006418..tRNA.aminoacylation.for.protein.translation	1	1	NA
GO.0006423..cysteinyl.tRNA.aminoacylation	1	1	NA
GO.0005788..endoplasmic.reticulum.lumen	0.207759	1	hsp-3
GO.0031581..hemidesmosome.assembly	1	1	NA
GO.0045471..response.to.ethanol	1	1	NA
GO.0009650..UV.protection	1	1	NA
GO.0007079..mitotic.chromosome.movement.towards.spindle.pole	1	1	NA
GO.0007080..mitotic.metaphase.plate.congression	1	1	NA
GO.1990385..meiotic.spindle.midzone	1	1	NA
GO.1990386..mitotic.cleavage.furrow.ingression	1	1	NA
GO.0048747..muscle.fiber.development	0.0286774	1	csk-1
GO.0008180..COP9.signalosome	1	1	NA
GO.0010388..cullin.deneddylation	1	1	NA
GO.0019784..NEDD8.specific.protease.activity	1	1	NA
GO.0000338..protein.deneddylation	1	1	NA
GO.0017151..DEAD.H.box.RNA.helicase.binding	1	1	NA
GO.0031672..A.band	0.0968407	1	myo-3
GO.0097153..cysteine.type.endopeptidase.activity.involved.in.apoptotic.process	1	1	NA
GO.0042383..sarcolemma	1	1	NA
GO.0055074..calcium.ion.homeostasis	1	1	NA
GO.0009055..electron.carrier.activity	0.132608	1	acdh-9, cyc-1
GO.0022904..respiratory.electron.transport.chain	1	1	NA
GO.0070469..respiratory.chain	1	1	NA
GO.0004096..catalase.activity	1	1	NA
GO.0042542..response.to.hydrogen.peroxide	1	1	NA
GO.0007031..peroxisome.organization	1	1	NA
GO.0007266..Rho.protein.signal.transduction	1	1	NA
GO.0004108..citrate..Si..synthase.activity	1	1	NA
GO.0005759..mitochondrial.matrix	1	1	NA
GO.0006101..citrate.metabolic.process	1	1	NA
GO.0046912..transferase.activity..transferring.acyl.groups..acyl.groups.converted.into.alkyl.on.transfer	1	1	NA
GO.0004008..copper.exporting.ATPase.activity	1	1	NA
GO.0005375..copper.ion.transmembrane.transporter.activity	1	1	NA
GO.0005507..copper.ion.binding	0.196136	1	sco-1
GO.0005774..vacuolar.membrane	0.109891	1	vha-1
GO.0005802..trans.Golgi.network	1	1	NA
GO.0006825..copper.ion.transport	0.0565363	1	sco-1
GO.0006878..cellular.copper.ion.homeostasis	0.0427077	1	sco-1
GO.0019829..cation.transporting.ATPase.activity	1	1	NA
GO.0030001..metal.ion.transport	1	1	NA
GO.0060003..copper.ion.export	1	1	NA
GO.0015677..copper.ion.import	1	1	NA
GO.0015680..intracellular.copper.ion.transport	1	1	NA
GO.0016530..metallochaperone.activity	1	1	NA
GO.0016531..copper.chaperone.activity	1	1	NA
GO.0008285..negative.regulation.of.cell.proliferation	1	1	NA
GO.0010826..negative.regulation.of.centrosome.duplication	1	1	NA
GO.0019005..SCF.ubiquitin.ligase.complex	1	1	NA
GO.0031647..regulation.of.protein.stability	1	1	NA
GO.0045930..negative.regulation.of.mitotic.cell.cycle	1	1	NA
GO.0008105..asymmetric.protein.localization	1	1	NA
GO.0019100..male.germ.line.sex.determination	1	1	NA
GO.0019102..male.somatic.sex.determination	1	1	NA
GO.0031461..cullin.RING.ubiquitin.ligase.complex	1	1	NA
GO.0036369..transcription.factor.catabolic.process	1	1	NA
GO.0042078..germ.line.stem.cell.division	1	1	NA
GO.0051232..meiotic.spindle.elongation	1	1	NA
GO.0051759..sister.chromosome.movement.towards.spindle.pole.involved.in.meiotic.sister.chromatid.segregation	1	1	NA
GO.1902104..positive.regulation.of.metaphase.anaphase.transition.of.meiotic.cell.cycle	1	1	NA
GO.0031463..Cul3.RING.ubiquitin.ligase.complex	1	1	NA
GO.0044257..cellular.protein.catabolic.process	1	1	NA
GO.0043161..proteasome.mediated.ubiquitin.dependent.protein.catabolic.process	0.363305	1	ubxn-2
GO.0031466..Cul5.RING.ubiquitin.ligase.complex	1	1	NA
GO.0051607..defense.response.to.virus	1	1	NA
GO.0006897..endocytosis	1	1	NA
GO.0051788..response.to.misfolded.protein	1	1	NA
GO.0097038..perinuclear.endoplasmic.reticulum	1	1	NA
GO.0030100..regulation.of.endocytosis	1	1	NA
GO.0030659..cytoplasmic.vesicle.membrane	1	1	NA
GO.0005217..intracellular.ligand.gated.ion.channel.activity	1	1	NA
GO.0007041..lysosomal.transport	1	1	NA
GO.0010877..lipid.transport.involved.in.lipid.storage	1	1	NA
GO.0036019..endolysosome	1	1	NA
GO.0045806..negative.regulation.of.endocytosis	1	1	NA
GO.0005578..proteinaceous.extracellular.matrix	1	1	NA
GO.0030971..receptor.tyrosine.kinase.binding	0.0701661	1	dsh-1
GO.0009948..anterior.posterior.axis.specification	1	1	NA
GO.0010084..specification.of.organ.axis.polarity	1	1	NA
GO.0033564..anterior.posterior.axon.guidance	1	1	NA
GO.0060573..cell.fate.specification.involved.in.pattern.specification	1	1	NA
GO.0045859..regulation.of.protein.kinase.activity	1	1	NA
GO.0000070..mitotic.sister.chromatid.segregation	1	1	NA
GO.0000079..regulation.of.cyclin.dependent.protein.serine.threonine.kinase.activity	1	1	NA
GO.0007098..centrosome.cycle	1	1	NA
GO.0010389..regulation.of.G2.M.transition.of.mitotic.cell.cycle	1	1	NA
GO.0045144..meiotic.sister.chromatid.segregation	1	1	NA
GO.0051383..kinetochore.organization	1	1	NA
GO.0051445..regulation.of.meiotic.cell.cycle	1	1	NA
GO.0007506..gonadal.mesoderm.development	0.160242	1	rsp-2
GO.1904787..positive.regulation.of.asymmetric.protein.localization.involved.in.cell.fate.determination	1	1	NA
GO.0005814..centriole	1	1	NA
GO.0007088..regulation.of.mitotic.nuclear.division	1	1	NA
GO.0008284..positive.regulation.of.cell.proliferation	1	1	NA
GO.0010608..posttranscriptional.regulation.of.gene.expression	1	1	NA
GO.0042023..DNA.endoreduplication	1	1	NA
GO.0048815..hermaphrodite.genitalia.morphogenesis	1	1	NA
GO.1904776..regulation.of.protein.localization.to.cell.cortex	1	1	NA
GO.0005826..actomyosin.contractile.ring	1	1	NA
GO.0016043..cellular.component.organization	1	1	NA
GO.0032154..cleavage.furrow	1	1	NA
GO.1902410..mitotic.cytokinetic.process	1	1	NA
GO.1903673..mitotic.cleavage.furrow.formation	1	1	NA
GO.0004843..thiol.dependent.ubiquitin.specific.protease.activity	1	1	NA
GO.0016579..protein.deubiquitination	1	1	NA
GO.0036459..thiol.dependent.ubiquitinyl.hydrolase.activity	1	1	NA
GO.0097149..centralspindlin.complex	1	1	NA
GO.0030198..extracellular.matrix.organization	1	1	NA
GO.0005798..Golgi.associated.vesicle	1	1	NA
GO.0030122..AP.2.adaptor.complex	1	1	NA
GO.0030136..clathrin.coated.vesicle	1	1	NA
GO.0031982..vesicle	1	1	NA
GO.0032050..clathrin.heavy.chain.binding	0.0286774	1	clic-1
GO.0004579..dolichyl.diphosphooligosaccharide.protein.glycotransferase.activity	1	1	NA
GO.0008250..oligosaccharyltransferase.complex	1	1	NA
GO.0004675..transmembrane.receptor.protein.serine.threonine.kinase.activity	0.0968407	1	C08G9.1
GO.0004702..receptor.signaling.protein.serine.threonine.kinase.activity	1	1	NA
GO.0005024..transforming.growth.factor.beta.activated.receptor.activity	1	1	NA
GO.0007178..transmembrane.receptor.protein.serine.threonine.kinase.signaling.pathway	0.0968407	1	C08G9.1
GO.0007179..transforming.growth.factor.beta.receptor.signaling.pathway	1	1	NA
GO.0023014..signal.transduction.by.protein.phosphorylation	1	1	NA
GO.0061067..negative.regulation.of.dauer.larval.development	1	1	NA
GO.0005009..insulin.activated.receptor.activity	1	1	NA
GO.0010260..organ.senescence	1	1	NA
GO.0010467..gene.expression	1	1	NA
GO.0017046..peptide.hormone.binding	1	1	NA
GO.0040034..regulation.of.development..heterochronic	0.219214	1	lin-28
GO.0042169..SH2.domain.binding	1	1	NA
GO.0042992..negative.regulation.of.transcription.factor.import.into.nucleus	1	1	NA
GO.0043054..dauer.exit	1	1	NA
GO.0051425..PTB.domain.binding	1	1	NA
GO.1901031..regulation.of.response.to.reactive.oxygen.species	1	1	NA
GO.2000785..regulation.of.autophagosome.assembly	1	1	NA
GO.0001158..enhancer.sequence.specific.DNA.binding	1	1	NA
GO.0022604..regulation.of.cell.morphogenesis	1	1	NA
GO.0030509..BMP.signaling.pathway	1	1	NA
GO.0030513..positive.regulation.of.BMP.signaling.pathway	1	1	NA
GO.0030514..negative.regulation.of.BMP.signaling.pathway	1	1	NA
GO.0036122..BMP.binding	1	1	NA
GO.0046332..SMAD.binding	1	1	NA
GO.0008158..hedgehog.receptor.activity	1	1	NA
GO.0009653..anatomical.structure.morphogenesis	1	1	NA
GO.0046626..regulation.of.insulin.receptor.signaling.pathway	1	1	NA
GO.0005125..cytokine.activity	1	1	NA
GO.0005160..transforming.growth.factor.beta.receptor.binding	1	1	NA
GO.0008083..growth.factor.activity	1	1	NA
GO.0010862..positive.regulation.of.pathway.restricted.SMAD.protein.phosphorylation	1	1	NA
GO.0043408..regulation.of.MAPK.cascade	1	1	NA
GO.0048468..cell.development	1	1	NA
GO.0060395..SMAD.protein.signal.transduction	1	1	NA
GO.0043476..pigment.accumulation	1	1	NA
GO.0007267..cell.cell.signaling	1	1	NA
GO.0008202..steroid.metabolic.process	1	1	NA
GO.0008203..cholesterol.metabolic.process	1	1	NA
GO.0008395..steroid.hydroxylase.activity	1	1	NA
GO.0047749..cholestanetriol.26.monooxygenase.activity	1	1	NA
GO.0097500..receptor.localization.to.nonmotile.primary.cilium	1	1	NA
GO.0007168..receptor.guanylyl.cyclase.signaling.pathway	1	1	NA
GO.0007608..sensory.perception.of.smell	1	1	NA
GO.0008074..guanylate.cyclase.complex..soluble	1	1	NA
GO.0019236..response.to.pheromone	1	1	NA
GO.0019932..second.messenger.mediated.signaling	1	1	NA
GO.0030511..positive.regulation.of.transforming.growth.factor.beta.receptor.signaling.pathway	1	1	NA
GO.0004879..RNA.polymerase.II.transcription.factor.activity..ligand.activated.sequence.specific.DNA.binding	1	1	NA
GO.0043401..steroid.hormone.mediated.signaling.pathway	1	1	NA
GO.0031931..TORC1.complex	1	1	NA
GO.0002821..positive.regulation.of.adaptive.immune.response	1	1	NA
GO.0010564..regulation.of.cell.cycle.process	1	1	NA
GO.0033613..activating.transcription.factor.binding	1	1	NA
GO.0034605..cellular.response.to.heat	1	1	NA
GO.0040008..regulation.of.growth	0.0427077	1	rsp-2
GO.0040015..negative.regulation.of.multicellular.organism.growth	1	1	NA
GO.0043620..regulation.of.DNA.templated.transcription.in.response.to.stress	1	1	NA
GO.0046890..regulation.of.lipid.biosynthetic.process	1	1	NA
GO.0060537..muscle.tissue.development	1	1	NA
GO.1900426..positive.regulation.of.defense.response.to.bacterium	1	1	NA
GO.1990381..ubiquitin.specific.protease.binding	1	1	NA
GO.0000978..RNA.polymerase.II.core.promoter.proximal.region.sequence.specific.DNA.binding	0.160242	1	zip-11
GO.1902855..regulation.of.nonmotile.primary.cilium.assembly	1	1	NA
GO.0006611..protein.export.from.nucleus	1	1	NA
GO.0061077..chaperone.mediated.protein.folding	1	1	NA
GO.0006970..response.to.osmotic.stress	1	1	NA
GO.0010753..positive.regulation.of.cGMP.mediated.signaling	1	1	NA
GO.0097499..protein.localization.to.nonmotile.primary.cilium	1	1	NA
GO.0005158..insulin.receptor.binding	1	1	NA
GO.0005179..hormone.activity	1	1	NA
GO.0042990..regulation.of.transcription.factor.import.into.nucleus	1	1	NA
GO.0004596..peptide.alpha.N.acetyltransferase.activity	1	1	NA
GO.0006474..N.terminal.protein.amino.acid.acetylation	1	1	NA
GO.0006475..internal.protein.amino.acid.acetylation	1	1	NA
GO.0008080..N.acetyltransferase.activity	1	1	NA
GO.0017198..N.terminal.peptidyl.serine.acetylation	1	1	NA
GO.0018002..N.terminal.peptidyl.glutamic.acid.acetylation	1	1	NA
GO.0031415..NatA.complex	1	1	NA
GO.0032504..multicellular.organism.reproduction	1	1	NA
GO.0051091..positive.regulation.of.sequence.specific.DNA.binding.transcription.factor.activity	1	1	NA
GO.1990189..peptide.serine.N.acetyltransferase.activity	1	1	NA
GO.1990190..peptide.glutamate.N.acetyltransferase.activity	1	1	NA
GO.0004488..methylenetetrahydrofolate.dehydrogenase..NADP...activity	1	1	NA
GO.0009396..folic.acid.containing.compound.biosynthetic.process	1	1	NA
GO.0009303..rRNA.transcription	1	1	NA
GO.0005761..mitochondrial.ribosome	0.109891	1	mrpl-51
GO.0005763..mitochondrial.small.ribosomal.subunit	0.294913	1	mrps-7
GO.0015935..small.ribosomal.subunit	1	1	NA
GO.0005254..chloride.channel.activity	1	1	NA
GO.0005275..amine.transmembrane.transporter.activity	1	1	NA
GO.0005328..neurotransmitter.sodium.symporter.activity	1	1	NA
GO.0005329..dopamine.transmembrane.transporter.activity	1	1	NA
GO.0005330..dopamine.sodium.symporter.activity	1	1	NA
GO.0006836..neurotransmitter.transport	1	1	NA
GO.0015837..amine.transport	1	1	NA
GO.0030673..axolemma	1	1	NA
GO.0032590..dendrite.membrane	1	1	NA
GO.0042734..presynaptic.membrane	1	1	NA
GO.0051583..dopamine.uptake.involved.in.synaptic.transmission	1	1	NA
GO.0090494..dopamine.uptake	1	1	NA
GO.0045793..positive.regulation.of.cell.size	1	1	NA
GO.0046622..positive.regulation.of.organ.growth	1	1	NA
GO.0070700..BMP.receptor.binding	1	1	NA
GO.0000375..RNA.splicing..via.transesterification.reactions	1	1	NA
GO.0008419..RNA.lariat.debranching.enzyme.activity	1	1	NA
GO.0016788..hydrolase.activity..acting.on.ester.bonds	1	1	NA
GO.0006306..DNA.methylation	1	1	NA
GO.0016581..NuRD.complex	1	1	NA
GO.0004525..ribonuclease.III.activity	1	1	NA
GO.0004530..deoxyribonuclease.I.activity	1	1	NA
GO.0016442..RISC.complex	1	1	NA
GO.0016891..endoribonuclease.activity..producing.5.phosphomonoesters	1	1	NA
GO.0030422..production.of.siRNA.involved.in.RNA.interference	1	1	NA
GO.0031050..dsRNA.fragmentation	1	1	NA
GO.0031054..pre.miRNA.processing	0.0565363	1	lin-28
GO.2000636..positive.regulation.of.primary.miRNA.processing	1	1	NA
GO.0000288..nuclear.transcribed.mRNA.catabolic.process..deadenylation.dependent.decay	0.0968407	1	ntl-2
GO.0000290..deadenylation.dependent.decapping.of.nuclear.transcribed.mRNA	1	1	NA
GO.0000340..RNA.7.methylguanosine.cap.binding	0.0836	1	ife-4
GO.0004780..sulfate.adenylyltransferase..ADP..activity	1	1	NA
GO.0006402..mRNA.catabolic.process	0.0968407	1	disl-2
GO.0006790..sulfur.compound.metabolic.process	1	1	NA
GO.0009150..purine.ribonucleotide.metabolic.process	1	1	NA
GO.0047627..adenylylsulfatase.activity	1	1	NA
GO.0050072..m7G.5.pppN.diphosphatase.activity	1	1	NA
GO.0007016..cytoskeletal.anchoring.at.plasma.membrane	1	1	NA
GO.0005272..sodium.channel.activity	1	1	NA
GO.0010447..response.to.acidic.pH	1	1	NA
GO.0035725..sodium.ion.transmembrane.transport	1	1	NA
GO.0043200..response.to.amino.acid	1	1	NA
GO.0043067..regulation.of.programmed.cell.death	1	1	NA
GO.0004143..diacylglycerol.kinase.activity	1	1	NA
GO.0007205..protein.kinase.C.activating.G.protein.coupled.receptor.signaling.pathway	1	1	NA
GO.0007210..serotonin.receptor.signaling.pathway	1	1	NA
GO.0007212..dopamine.receptor.signaling.pathway	1	1	NA
GO.0044297..cell.body	1	1	NA
GO.0046834..lipid.phosphorylation	1	1	NA
GO.0043052..thermotaxis	1	1	NA
GO.0048169..regulation.of.long.term.neuronal.synaptic.plasticity	1	1	NA
GO.0009925..basal.plasma.membrane	0.0968407	1	unc-97
GO.0016010..dystrophin.associated.glycoprotein.complex	1	1	NA
GO.0043236..laminin.binding	1	1	NA
GO.0008090..retrograde.axonal.transport	1	1	NA
GO.0016322..neuron.remodeling	1	1	NA
GO.0035047..centrosomal.and.pronuclear.rotation	1	1	NA
GO.0048814..regulation.of.dendrite.morphogenesis	1	1	NA
GO.0051293..establishment.of.spindle.localization	1	1	NA
GO.1902473..regulation.of.protein.localization.to.synapse	1	1	NA
GO.1990048..anterograde.dense.core.granule.transport	1	1	NA
GO.0004157..dihydropyrimidinase.activity	1	1	NA
GO.0006208..pyrimidine.nucleobase.catabolic.process	1	1	NA
GO.0016812..hydrolase.activity..acting.on.carbon.nitrogen..but.not.peptide..bonds..in.cyclic.amides	1	1	NA
GO.0046113..nucleobase.catabolic.process	1	1	NA
GO.0005811..lipid.particle	1	1	NA
GO.0033555..multicellular.organismal.response.to.stress	1	1	NA
GO.0016229..steroid.dehydrogenase.activity	1	1	NA
GO.0004090..carbonyl.reductase..NADPH..activity	1	1	NA
GO.0005997..xylulose.metabolic.process	1	1	NA
GO.0005998..xylulose.catabolic.process	1	1	NA
GO.0006006..glucose.metabolic.process	1	1	NA
GO.0042732..D.xylose.metabolic.process	1	1	NA
GO.0050038..L.xylulose.reductase..NADP...activity	1	1	NA
GO.0051289..protein.homotetramerization	1	1	NA
GO.0000038..very.long.chain.fatty.acid.metabolic.process	1	1	NA
GO.0006637..acyl.CoA.metabolic.process	1	1	NA
GO.0010888..negative.regulation.of.lipid.storage	1	1	NA
GO.0042811..pheromone.biosynthetic.process	1	1	NA
GO.0048639..positive.regulation.of.developmental.growth	1	1	NA
GO.1904070..ascaroside.biosynthetic.process	1	1	NA
GO.0006839..mitochondrial.transport	1	1	NA
GO.0000175..3.5.exoribonuclease.activity	0.0701661	1	disl-2
GO.0006364..rRNA.processing	0.517446	1	disl-2
GO.0003887..DNA.directed.DNA.polymerase.activity	1	1	NA
GO.0005658..alpha.DNA.polymerase.primase.complex	1	1	NA
GO.0071897..DNA.biosynthetic.process	1	1	NA
GO.0005875..microtubule.associated.complex	1	1	NA
GO.0004385..guanylate.kinase.activity	1	1	NA
GO.0008328..ionotropic.glutamate.receptor.complex	1	1	NA
GO.0035255..ionotropic.glutamate.receptor.binding	1	1	NA
GO.0043113..receptor.clustering	1	1	NA
GO.0045186..zonula.adherens.assembly	1	1	NA
GO.0045197..establishment.or.maintenance.of.epithelial.cell.apical.basal.polarity	1	1	NA
GO.0046037..GMP.metabolic.process	1	1	NA
GO.0046710..GDP.metabolic.process	1	1	NA
GO.0005868..cytoplasmic.dynein.complex	1	1	NA
GO.0035371..microtubule.plus.end	1	1	NA
GO.0000186..activation.of.MAPKK.activity	1	1	NA
GO.0004709..MAP.kinase.kinase.kinase.activity	1	1	NA
GO.0048677..axon.extension.involved.in.regeneration	1	1	NA
GO.0048689..formation.of.growth.cone.in.injured.axon	1	1	NA
GO.1903616..MAPK.cascade.involved.in.axon.regeneration	1	1	NA
GO.0000014..single.stranded.DNA.endodeoxyribonuclease.activity	1	1	NA
GO.0043141..ATP.dependent.5.3.DNA.helicase.activity	0.0565363	1	ruvb-2
GO.0043142..single.stranded.DNA.dependent.ATPase.activity	1	1	NA
GO.0007097..nuclear.migration	1	1	NA
GO.0010970..establishment.of.localization.by.movement.along.microtubule	1	1	NA
GO.0045502..dynein.binding	1	1	NA
GO.0045505..dynein.intermediate.chain.binding	1	1	NA
GO.0000242..pericentriolar.material	1	1	NA
GO.0006469..negative.regulation.of.protein.kinase.activity	1	1	NA
GO.0051787..misfolded.protein.binding	1	1	NA
GO.0045454..cell.redox.homeostasis	0.113404	1	tpi-1, gsr-1
GO.0031072..heat.shock.protein.binding	1	1	NA
GO.0007269..neurotransmitter.secretion	1	1	NA
GO.0016226..iron.sulfur.cluster.assembly	1	1	NA
GO.0051259..protein.oligomerization	1	1	NA
GO.0015036..disulfide.oxidoreductase.activity	1	1	NA
GO.0034975..protein.folding.in.endoplasmic.reticulum	1	1	NA
GO.0008026..ATP.dependent.helicase.activity	1	1	NA
GO.0043570..maintenance.of.DNA.repeat.elements	1	1	NA
GO.0090329..regulation.of.DNA.dependent.DNA.replication	1	1	NA
GO.0009794..regulation.of.mitotic.cell.cycle..embryonic	1	1	NA
GO.0001588..dopamine.neurotransmitter.receptor.activity..coupled.via.Gs	1	1	NA
GO.0001963..synaptic.transmission..dopaminergic	1	1	NA
GO.0007191..adenylate.cyclase.activating.dopamine.receptor.signaling.pathway	1	1	NA
GO.0035240..dopamine.binding	1	1	NA
GO.0051379..epinephrine.binding	1	1	NA
GO.0051380..norepinephrine.binding	1	1	NA
GO.0001591..dopamine.neurotransmitter.receptor.activity..coupled.via.Gi.Go	1	1	NA
GO.0060108..annular.furrow.extracellular.matrix	1	1	NA
GO.0003756..protein.disulfide.isomerase.activity	1	1	NA
GO.0015035..protein.disulfide.oxidoreductase.activity	1	1	NA
GO.0034976..response.to.endoplasmic.reticulum.stress	1	1	NA
GO.0004656..procollagen.proline.4.dioxygenase.activity	1	1	NA
GO.0016702..oxidoreductase.activity..acting.on.single.donors.with.incorporation.of.molecular.oxygen..incorporation.of.two.atoms.of.oxygen	1	1	NA
GO.0019511..peptidyl.proline.hydroxylation	1	1	NA
GO.0031418..L.ascorbic.acid.binding	1	1	NA
GO.0031545..peptidyl.proline.4.dioxygenase.activity	1	1	NA
GO.0043412..macromolecule.modification	1	1	NA
GO.0051213..dioxygenase.activity	1	1	NA
GO.0000030..mannosyltransferase.activity	1	1	NA
GO.0005637..nuclear.inner.membrane	1	1	NA
GO.0018406..protein.C.linked.glycosylation.via.2.alpha.mannosyl.L.tryptophan	1	1	NA
GO.0000805..X.chromosome	1	1	NA
GO.0001104..RNA.polymerase.II.transcription.cofactor.activity	1	1	NA
GO.0016592..mediator.complex	1	1	NA
GO.0005905..coated.pit	1	1	NA
GO.0061357..positive.regulation.of.Wnt.protein.secretion	1	1	NA
GO.1990075..periciliary.membrane.compartment	0.0836	1	clic-1
GO.0042464..dosage.compensation.by.hypoactivation.of.X.chromosome	1	1	NA
GO.0046536..dosage.compensation.complex	1	1	NA
GO.0000799..nuclear.condensin.complex	1	1	NA
GO.0010032..meiotic.chromosome.condensation	1	1	NA
GO.0045128..negative.regulation.of.reciprocal.meiotic.recombination	1	1	NA
GO.0051304..chromosome.separation	1	1	NA
GO.0006348..chromatin.silencing.at.telomere	1	1	NA
GO.0042800..histone.methyltransferase.activity..H3.K4.specific.	1	1	NA
GO.0048188..Set1C.COMPASS.complex	1	1	NA
GO.0051568..histone.H3.K4.methylation	1	1	NA
GO.0000151..ubiquitin.ligase.complex	1	1	NA
GO.0008078..mesodermal.cell.migration	1	1	NA
GO.0000266..mitochondrial.fission	1	1	NA
GO.0008637..apoptotic.mitochondrial.changes	1	1	NA
GO.0004815..aspartate.tRNA.ligase.activity	1	1	NA
GO.0006422..aspartyl.tRNA.aminoacylation	1	1	NA
GO.2000748..positive.regulation.of.defecation.rhythm	1	1	NA
GO.0060069..Wnt.signaling.pathway..regulating.spindle.positioning	0.109891	1	dsh-1
GO.0060071..Wnt.signaling.pathway..planar.cell.polarity.pathway	0.0565363	1	dsh-1
GO.0048546..digestive.tract.morphogenesis	1	1	NA
GO.0005277..acetylcholine.transmembrane.transporter.activity	1	1	NA
GO.0007529..establishment.of.synaptic.specificity.at.neuromuscular.junction	1	1	NA
GO.0007626..locomotory.behavior	0.241631	1	myo-3
GO.0015870..acetylcholine.transport	1	1	NA
GO.0016014..dystrobrevin.complex	1	1	NA
GO.0032224..positive.regulation.of.synaptic.transmission..cholinergic	0.0836	1	ric-3
GO.0046716..muscle.cell.cellular.homeostasis	1	1	NA
GO.0008307..structural.constituent.of.muscle	1	1	NA
GO.0030235..nitric.oxide.synthase.regulator.activity	1	1	NA
GO.0005879..axonemal.microtubule	1	1	NA
GO.0018095..protein.polyglutamylation	1	1	NA
GO.0060271..cilium.morphogenesis	1	1	NA
GO.0000165..MAPK.cascade	1	1	NA
GO.0004707..MAP.kinase.activity	1	1	NA
GO.0003391..amphid.sensory.organ.dendrite.retrograde.extension	1	1	NA
GO.0043621..protein.self.association	0.184345	1	snx-1
GO.0006461..protein.complex.assembly	1	1	NA
GO.0055088..lipid.homeostasis	0.263408	1	acdh-9
GO.0031143..pseudopodium	1	1	NA
GO.0090386..phagosome.maturation.involved.in.apoptotic.cell.clearance	0.122754	1	snx-1
GO.0043056..forward.locomotion	1	1	NA
GO.0045203..integral.component.of.cell.outer.membrane	1	1	NA
GO.0060378..regulation.of.brood.size	1	1	NA
GO.0000303..response.to.superoxide	0.122754	1	gsr-1
GO.0008053..mitochondrial.fusion	1	1	NA
GO.0035264..multicellular.organism.growth	1	1	NA
GO.0006820..anion.transport	1	1	NA
GO.0008344..adult.locomotory.behavior	1	1	NA
GO.0022857..transmembrane.transporter.activity	1	1	NA
GO.0030672..synaptic.vesicle.membrane	1	1	NA
GO.0061096..negative.regulation.of.turning.behavior.involved.in.mating	1	1	NA
GO.0005243..gap.junction.channel.activity	1	1	NA
GO.0055077..gap.junction.hemi.channel.activity	1	1	NA
GO.0005391..sodium.potassium.exchanging.ATPase.activity	1	1	NA
GO.0006813..potassium.ion.transport	1	1	NA
GO.0006883..cellular.sodium.ion.homeostasis	1	1	NA
GO.0006937..regulation.of.muscle.contraction	1	1	NA
GO.0010107..potassium.ion.import	1	1	NA
GO.0010248..establishment.or.maintenance.of.transmembrane.electrochemical.gradient	1	1	NA
GO.0030007..cellular.potassium.ion.homeostasis	1	1	NA
GO.0036376..sodium.ion.export.from.cell	1	1	NA
GO.0005834..heterotrimeric.G.protein.complex	1	1	NA
GO.0008277..regulation.of.G.protein.coupled.receptor.protein.signaling.pathway	1	1	NA
GO.0030845..phospholipase.C.inhibiting.G.protein.coupled.receptor.signaling.pathway	1	1	NA
GO.0043087..regulation.of.GTPase.activity	0.135431	1	swan-1
GO.0050804..modulation.of.synaptic.transmission	1	1	NA
GO.0022834..ligand.gated.channel.activity	1	1	NA
GO.0045161..neuronal.ion.channel.clustering	1	1	NA
GO.0004084..branched.chain.amino.acid.transaminase.activity	1	1	NA
GO.0008483..transaminase.activity	1	1	NA
GO.0008652..cellular.amino.acid.biosynthetic.process	1	1	NA
GO.0009081..branched.chain.amino.acid.metabolic.process	1	1	NA
GO.0009082..branched.chain.amino.acid.biosynthetic.process	1	1	NA
GO.0052654..L.leucine.transaminase.activity	1	1	NA
GO.0052655..L.valine.transaminase.activity	1	1	NA
GO.0052656..L.isoleucine.transaminase.activity	1	1	NA
GO.0003857..3.hydroxyacyl.CoA.dehydrogenase.activity	1	1	NA
GO.0004300..enoyl.CoA.hydratase.activity	1	1	NA
GO.0006635..fatty.acid.beta.oxidation	1	1	NA
GO.0016507..mitochondrial.fatty.acid.beta.oxidation.multienzyme.complex	1	1	NA
GO.0000768..syncytium.formation.by.plasma.membrane.fusion	1	1	NA
GO.0044291..cell.cell.contact.zone	1	1	NA
GO.0090597..nematode.male.tail.mating.organ.morphogenesis	1	1	NA
GO.0004686..elongation.factor.2.kinase.activity	1	1	NA
GO.0048557..embryonic.digestive.tract.morphogenesis	1	1	NA
GO.0046875..ephrin.receptor.binding	1	1	NA
GO.0048013..ephrin.receptor.signaling.pathway	1	1	NA
GO.0060280..negative.regulation.of.ovulation	0.0286774	1	egrh-1
GO.0031225..anchored.component.of.membrane	1	1	NA
GO.0042074..cell.migration.involved.in.gastrulation	1	1	NA
GO.0032091..negative.regulation.of.protein.binding	1	1	NA
GO.0005267..potassium.channel.activity	1	1	NA
GO.0006936..muscle.contraction	0.207759	1	tni-1
GO.0031528..microvillus.membrane	1	1	NA
GO.0030070..insulin.processing	1	1	NA
GO.0090325..regulation.of.locomotion.involved.in.locomotory.behavior	1	1	NA
GO.0004692..cGMP.dependent.protein.kinase.activity	1	1	NA
GO.0030308..negative.regulation.of.cell.growth	1	1	NA
GO.0046621..negative.regulation.of.organ.growth	1	1	NA
GO.0051343..positive.regulation.of.cyclic.nucleotide.phosphodiesterase.activity	1	1	NA
GO.1902160..negative.regulation.of.cyclic.nucleotide.gated.ion.channel.activity	1	1	NA
GO.0004435..phosphatidylinositol.phospholipase.C.activity	1	1	NA
GO.0007320..insemination	1	1	NA
GO.0016042..lipid.catabolic.process	1	1	NA
GO.0034609..spicule.insertion	1	1	NA
GO.0018401..peptidyl.proline.hydroxylation.to.4.hydroxy.L.proline	1	1	NA
GO.0007622..rhythmic.behavior	1	1	NA
GO.0009968..negative.regulation.of.signal.transduction	1	1	NA
GO.0048664..neuron.fate.determination	1	1	NA
GO.0005104..fibroblast.growth.factor.receptor.binding	1	1	NA
GO.0008543..fibroblast.growth.factor.receptor.signaling.pathway	1	1	NA
GO.0061025..membrane.fusion	0.147927	1	ubxn-2
GO.0035545..determination.of.left.right.asymmetry.in.nervous.system	1	1	NA
GO.0004180..carboxypeptidase.activity	1	1	NA
GO.0004181..metallocarboxypeptidase.activity	1	1	NA
GO.0004185..serine.type.carboxypeptidase.activity	1	1	NA
GO.0006518..peptide.metabolic.process	1	1	NA
GO.0014055..acetylcholine.secretion..neurotransmission	1	1	NA
GO.0022841..potassium.ion.leak.channel.activity	1	1	NA
GO.0030322..stabilization.of.membrane.potential	1	1	NA
GO.0001664..G.protein.coupled.receptor.binding	1	1	NA
GO.0019001..guanyl.nucleotide.binding	1	1	NA
GO.0031683..G.protein.beta.gamma.subunit.complex.binding	1	1	NA
GO.0060158..phospholipase.C.activating.dopamine.receptor.signaling.pathway	1	1	NA
GO.1902474..positive.regulation.of.protein.localization.to.synapse	1	1	NA
GO.0005251..delayed.rectifier.potassium.channel.activity	1	1	NA
GO.0008076..voltage.gated.potassium.channel.complex	1	1	NA
GO.0051260..protein.homooligomerization	0.433418	1	inso-1
GO.0060065..uterus.development	1	1	NA
GO.0031536..positive.regulation.of.exit.from.mitosis	1	1	NA
GO.0035329..hippo.signaling	0.0427077	1	sav-1
GO.0048675..axon.extension	0.408075	1	unc-33
GO.0045182..translation.regulator.activity	1	1	NA
GO.0055057..neuroblast.division	1	1	NA
GO.0050909..sensory.perception.of.taste	1	1	NA
GO.0001172..transcription..RNA.templated	1	1	NA
GO.0003968..RNA.directed.RNA.polymerase.activity	1	1	NA
GO.0031081..nuclear.pore.distribution	1	1	NA
GO.0070090..metaphase.plate	1	1	NA
GO.0043162..ubiquitin.dependent.protein.catabolic.process.via.the.multivesicular.body.sorting.pathway	1	1	NA
GO.1903361..protein.localization.to.basolateral.plasma.membrane	0.0968407	1	C11H1.3
GO.0048488..synaptic.vesicle.endocytosis	1	1	NA
GO.0031369..translation.initiation.factor.binding	0.109891	1	eif-3.C
GO.0071541..eukaryotic.translation.initiation.factor.3.complex..eIF3m	1	1	NA
GO.0042254..ribosome.biogenesis	1	1	NA
GO.0042256..mature.ribosome.assembly	1	1	NA
GO.0042273..ribosomal.large.subunit.biogenesis	0.147927	1	rpl-14
GO.0043023..ribosomal.large.subunit.binding	1	1	NA
GO.0006368..transcription.elongation.from.RNA.polymerase.II.promoter	0.135431	1	elb-1
GO.0030891..VCB.complex	0.0286774	1	elb-1
GO.0031462..Cul2.RING.ubiquitin.ligase.complex	0.122754	1	elb-1
GO.0070449..elongin.complex	0.0286774	1	elb-1
GO.0032968..positive.regulation.of.transcription.elongation.from.RNA.polymerase.II.promoter	1	1	NA
GO.0006636..unsaturated.fatty.acid.biosynthetic.process	1	1	NA
GO.0001162..RNA.polymerase.II.intronic.transcription.regulatory.region.sequence.specific.DNA.binding	1	1	NA
GO.0007507..heart.development	1	1	NA
GO.0009887..organ.morphogenesis	1	1	NA
GO.0048565..digestive.tract.development	1	1	NA
GO.0048646..anatomical.structure.formation.involved.in.morphogenesis	1	1	NA
GO.0003705..transcription.factor.activity..RNA.polymerase.II.distal.enhancer.sequence.specific.binding	1	1	NA
GO.0007586..digestion	1	1	NA
GO.0030856..regulation.of.epithelial.cell.differentiation	1	1	NA
GO.1902097..positive.regulation.of.transcription.from.RNA.polymerase.II.promoter.involved.in.defense.response.to.Gram.negative.bacterium	1	1	NA
GO.0000983..transcription.factor.activity..RNA.polymerase.II.core.promoter.sequence.specific	1	1	NA
GO.0061404..positive.regulation.of.transcription.from.RNA.polymerase.II.promoter.in.response.to.increased.salt	1	1	NA
GO.1901244..positive.regulation.of.transcription.from.RNA.polymerase.II.promoter.involved.in.defense.response.to.fungus	1	1	NA
GO.0005681..spliceosomal.complex	0.0905694	1	hel-1, snr-7
GO.0032784..regulation.of.DNA.templated.transcription..elongation	1	1	NA
GO.0003958..NADPH.hemoprotein.reductase.activity	1	1	NA
GO.0010181..FMN.binding	1	1	NA
GO.0030586...methionine.synthase..reductase.activity	1	1	NA
GO.0005201..extracellular.matrix.structural.constituent	1	1	NA
GO.0050714..positive.regulation.of.protein.secretion	1	1	NA
GO.0007091..metaphase.anaphase.transition.of.mitotic.cell.cycle	1	1	NA
GO.0030071..regulation.of.mitotic.metaphase.anaphase.transition	1	1	NA
GO.0031145..anaphase.promoting.complex.dependent.catabolic.process	1	1	NA
GO.0001555..oocyte.growth	0.0286774	1	emo-1
GO.0005521..lamin.binding	1	1	NA
GO.0005639..integral.component.of.nuclear.inner.membrane	1	1	NA
GO.0007493..endodermal.cell.fate.determination	1	1	NA
GO.0005337..nucleoside.transmembrane.transporter.activity	1	1	NA
GO.1901642..nucleoside.transmembrane.transport	1	1	NA
GO.0051402..neuron.apoptotic.process	0.0286774	1	eor-2
GO.0007231..osmosensory.signaling.pathway	1	1	NA
GO.0005034..osmosensor.activity	1	1	NA
GO.0007414..axonal.defasciculation	1	1	NA
GO.0010950..positive.regulation.of.endopeptidase.activity	1	1	NA
GO.0071711..basement.membrane.organization	1	1	NA
GO.0032009..early.phagosome	0.0565363	1	snx-1
GO.0005903..brush.border	1	1	NA
GO.0030056..hemidesmosome	0.160242	1	pix-1
GO.0045109..intermediate.filament.organization	1	1	NA
GO.0045185..maintenance.of.protein.location	1	1	NA
GO.0048730..epidermis.morphogenesis	1	1	NA
GO.0051017..actin.filament.bundle.assembly	1	1	NA
GO.0006621..protein.retention.in.ER.lumen	1	1	NA
GO.0046923..ER.retention.sequence.binding	1	1	NA
GO.0000467..exonucleolytic.trimming.to.generate.mature.3.end.of.5.8S.rRNA.from.tricistronic.rRNA.transcript..SSU.rRNA..5.8S.rRNA..LSU.rRNA.	0.0836	1	exos-8
GO.1900369..negative.regulation.of.RNA.interference	1	1	NA
GO.0019898..extrinsic.component.of.membrane	0.207759	1	snx-1
GO.0031941..filamentous.actin	1	1	NA
GO.0031974..membrane.enclosed.lumen	1	1	NA
GO.0045179..apical.cortex	1	1	NA
GO.0016671..oxidoreductase.activity..acting.on.a.sulfur.group.of.donors..disulfide.as.acceptor	1	1	NA
GO.0004819..glutamine.tRNA.ligase.activity	1	1	NA
GO.0006425..glutaminyl.tRNA.aminoacylation	1	1	NA
GO.0004818..glutamate.tRNA.ligase.activity	1	1	NA
GO.0006424..glutamyl.tRNA.aminoacylation	1	1	NA
GO.0019013..viral.nucleocapsid	1	1	NA
GO.0000982..transcription.factor.activity..RNA.polymerase.II.core.promoter.proximal.region.sequence.specific.binding	0.0427077	1	zip-11
GO.0060142..regulation.of.syncytium.formation.by.plasma.membrane.fusion	0.0565363	1	vha-1
GO.0007064..mitotic.sister.chromatid.cohesion	1	1	NA
GO.0005818..aster	1	1	NA
GO.0030540..female.genitalia.development	1	1	NA
GO.0043622..cortical.microtubule.organization	1	1	NA
GO.0002064..epithelial.cell.development	1	1	NA
GO.0035150..regulation.of.tube.size	1	1	NA
GO.0004364..glutathione.transferase.activity	1	1	NA
GO.0006749..glutathione.metabolic.process	0.241631	1	gsr-1
GO.0034707..chloride.channel.complex	1	1	NA
GO.0005089..Rho.guanyl.nucleotide.exchange.factor.activity	0.252599	1	pix-1
GO.0035023..regulation.of.Rho.protein.signal.transduction	0.252599	1	pix-1
GO.1904531..positive.regulation.of.actin.filament.binding	1	1	NA
GO.0000381..regulation.of.alternative.mRNA.splicing..via.spliceosome	1	1	NA
GO.0036195..muscle.cell.projection.membrane	1	1	NA
GO.0016917..GABA.receptor.activity	1	1	NA
GO.0045933..positive.regulation.of.muscle.contraction	1	1	NA
GO.0005242..inward.rectifier.potassium.channel.activity	1	1	NA
GO.0048729..tissue.morphogenesis	1	1	NA
GO.0008289..lipid.binding	1	1	NA
GO.0005504..fatty.acid.binding	1	1	NA
GO.0019841..retinol.binding	1	1	NA
GO.0070538..oleic.acid.binding	1	1	NA
GO.0042389..omega.3.fatty.acid.desaturase.activity	1	1	NA
GO.0004768..stearoyl.CoA.9.desaturase.activity	1	1	NA
GO.0016717..oxidoreductase.activity..acting.on.paired.donors..with.oxidation.of.a.pair.of.donors.resulting.in.the.reduction.of.molecular.oxygen.to.two.molecules.of.water	1	1	NA
GO.0016720..delta12.fatty.acid.dehydrogenase.activity	1	1	NA
GO.0030497..fatty.acid.elongation	1	1	NA
GO.0001820..serotonin.secretion	1	1	NA
GO.0032456..endocytic.recycling	0.147927	1	K02E10.1
GO.0045088..regulation.of.innate.immune.response	1	1	NA
GO.0042759..long.chain.fatty.acid.biosynthetic.process	1	1	NA
GO.0003707..steroid.hormone.receptor.activity	1	1	NA
GO.0043059..regulation.of.forward.locomotion	1	1	NA
GO.0042006..masculinization.of.hermaphroditic.germ.line	1	1	NA
GO.0005605..basal.lamina	1	1	NA
GO.0016504..peptidase.activator.activity	1	1	NA
GO.0042132..fructose.1.6.bisphosphate.1.phosphatase.activity	1	1	NA
GO.0042578..phosphoric.ester.hydrolase.activity	1	1	NA
GO.0071586..CAAX.box.protein.processing	1	1	NA
GO.0001540..beta.amyloid.binding	1	1	NA
GO.0030238..male.sex.determination	1	1	NA
GO.0033192..calmodulin.dependent.protein.phosphatase.activity	1	1	NA
GO.0035970..peptidyl.threonine.dephosphorylation	1	1	NA
GO.0043280..positive.regulation.of.cysteine.type.endopeptidase.activity.involved.in.apoptotic.process	1	1	NA
GO.0005544..calcium.dependent.phospholipid.binding	1	1	NA
GO.0007009..plasma.membrane.organization	1	1	NA
GO.0030317..sperm.motility	1	1	NA
GO.0031268..pseudopodium.organization	1	1	NA
GO.0000494..box.C.D.snoRNA.3.end.processing	1	1	NA
GO.0008033..tRNA.processing	1	1	NA
GO.0008649..rRNA.methyltransferase.activity	1	1	NA
GO.0015030..Cajal.body	1	1	NA
GO.0031167..rRNA.methylation	1	1	NA
GO.0031428..box.C.D.snoRNP.complex	1	1	NA
GO.0032040..small.subunit.processome	1	1	NA
GO.0045727..positive.regulation.of.translation	0.0968407	1	unc-62
GO.1990258..histone.glutamine.methylation	1	1	NA
GO.1990259..histone.glutamine.methyltransferase.activity	1	1	NA
GO.0005528..FK506.binding	1	1	NA
GO.0051879..Hsp90.protein.binding	0.0427077	1	sti-1
GO.0051014..actin.filament.severing	1	1	NA
GO.0005184..neuropeptide.hormone.activity	1	1	NA
GO.0071855..neuropeptide.receptor.binding	1	1	NA
GO.0045759..negative.regulation.of.action.potential	1	1	NA
GO.0042165..neurotransmitter.binding	1	1	NA
GO.0045988..negative.regulation.of.striated.muscle.contraction	1	1	NA
GO.0031841..neuropeptide.Y.receptor.binding	1	1	NA
GO.1904068..G.protein.coupled.receptor.signaling.pathway.involved.in.social.behavior	1	1	NA
GO.0007624..ultradian.rhythm	1	1	NA
GO.0007346..regulation.of.mitotic.cell.cycle	1	1	NA
GO.0031098..stress.activated.protein.kinase.signaling.cascade	1	1	NA
GO.0032147..activation.of.protein.kinase.activity	1	1	NA
GO.0048511..rhythmic.process	1	1	NA
GO.1902617..response.to.fluoride	1	1	NA
GO.0004499..N.N.dimethylaniline.monooxygenase.activity	1	1	NA
GO.0050661..NADP.binding	0.241631	1	gsr-1
GO.0018992..germ.line.sex.determination	1	1	NA
GO.0030371..translation.repressor.activity	1	1	NA
GO.0040021..hermaphrodite.germ.line.sex.determination	1	1	NA
GO.0008143..poly.A..binding	1	1	NA
GO.0008266..poly.U..RNA.binding	1	1	NA
GO.0034046..poly.G..binding	1	1	NA
GO.0016651..oxidoreductase.activity..acting.on.NAD.P.H	1	1	NA
GO.0004322..ferroxidase.activity	1	1	NA
GO.0006783..heme.biosynthetic.process	1	1	NA
GO.0008199..ferric.iron.binding	1	1	NA
GO.0055072..iron.ion.homeostasis	1	1	NA
GO.0045604..regulation.of.epidermal.cell.differentiation	1	1	NA
GO.0004826..phenylalanine.tRNA.ligase.activity	1	1	NA
GO.0006432..phenylalanyl.tRNA.aminoacylation	1	1	NA
GO.0009328..phenylalanine.tRNA.ligase.complex	1	1	NA
GO.0000287..magnesium.ion.binding	1	1	NA
GO.0048681..negative.regulation.of.axon.regeneration	1	1	NA
GO.0006826..iron.ion.transport	1	1	NA
GO.0042308..negative.regulation.of.protein.import.into.nucleus	1	1	NA
GO.0004333..fumarate.hydratase.activity	1	1	NA
GO.0006106..fumarate.metabolic.process	1	1	NA
GO.0006108..malate.metabolic.process	1	1	NA
GO.0045239..tricarboxylic.acid.cycle.enzyme.complex	1	1	NA
GO.0051262..protein.tetramerization	1	1	NA
GO.0008417..fucosyltransferase.activity	1	1	NA
GO.0032580..Golgi.cisterna.membrane	1	1	NA
GO.0036065..fucosylation	1	1	NA
GO.0046920..alpha..1..3..fucosyltransferase.activity	1	1	NA
GO.0008107..galactoside.2.alpha.L.fucosyltransferase.activity	1	1	NA
GO.0043413..macromolecule.glycosylation	1	1	NA
GO.0006487..protein.N.linked.glycosylation	0.196136	1	H43I07.3
GO.0008424..glycoprotein.6.alpha.L.fucosyltransferase.activity	1	1	NA
GO.0033578..protein.glycosylation.in.Golgi	1	1	NA
GO.0036071..N.glycan.fucosylation	1	1	NA
GO.0046921..alpha..1..6..fucosyltransferase.activity	1	1	NA
GO.0004890..GABA.A.receptor.activity	1	1	NA
GO.1902711..GABA.A.receptor.complex	1	1	NA
GO.0031235..intrinsic.component.of.the.cytoplasmic.side.of.the.plasma.membrane	1	1	NA
GO.0007213..G.protein.coupled.acetylcholine.receptor.signaling.pathway	1	1	NA
GO.0016907..G.protein.coupled.acetylcholine.receptor.activity	1	1	NA
GO.0007197..adenylate.cyclase.inhibiting.G.protein.coupled.acetylcholine.receptor.signaling.pathway	1	1	NA
GO.0007207..phospholipase.C.activating.G.protein.coupled.acetylcholine.receptor.signaling.pathway	1	1	NA
GO.0003954..NADH.dehydrogenase.activity	1	1	NA
GO.0006120..mitochondrial.electron.transport..NADH.to.ubiquinone	1	1	NA
GO.0008137..NADH.dehydrogenase..ubiquinone..activity	1	1	NA
[truncated: 3,319 more rows]

## Sheet: N3UvF3U-F3Uup-withCEH18peak
	p.values	FDR.BH	genes
GO.0016301..kinase.activity	4.95851e-11	2.63694e-07	mlk-1, ppk-3, akt-2, aak-2, egl-4, pct-1, unc-43, R11F4.1, aka-1, aakg-5, mnk-1, max-2, cdk-7, pck-2, rskn-2, csnk-1, wts-1, dlk-1, pck-1, efk-1, prk-1, tlk-1, cdk-5
GO.0016310..phosphorylation	1.28278e-10	3.41091e-07	mlk-1, ppk-3, akt-2, aak-2, egl-4, pct-1, unc-43, R11F4.1, aka-1, aakg-5, mnk-1, max-2, cdk-7, pck-2, rskn-2, csnk-1, wts-1, dlk-1, pck-1, efk-1, prk-1, tlk-1, cdk-5
GO.0046872..metal.ion.binding	3.61584e-07	0.000589501	ccch-1, aman-2, spat-3, C34D10.2, ppk-3, bra-1, akt-2, nhr-48, egl-4, jmjd-1.2, pct-1, nhr-66, T26A8.4, unc-43, aka-1, pde-4, C01G6.4, nhr-19, F43G6.8, ash-2, max-2, W02B8.2, nhr-61, dyb-1, lin-59, ipgm-1, T25G3.4, C36B1.9, rbpl-1, lin-41, nhr-49, wts-1, dlk-1, F22G12.4, mtm-3, F25B5.3, lin-13, zfp-1, athp-1, cdk-5
GO.0004674..protein.serine.threonine.kinase.activity	4.43401e-07	0.000589501	akt-2, aak-2, egl-4, pct-1, unc-43, max-2, cdk-7, rskn-2, csnk-1, wts-1, dlk-1, efk-1, prk-1, tlk-1, cdk-5
GO.0006468..protein.phosphorylation	1.62812e-06	0.00173167	mlk-1, W07G4.3, akt-2, aak-2, egl-4, pct-1, unc-43, mnk-1, max-2, cdk-7, rskn-2, csnk-1, wts-1, dlk-1, efk-1, prk-1, tlk-1, cdk-5
GO.0004672..protein.kinase.activity	2.5728e-06	0.00228036	mlk-1, W07G4.3, akt-2, aak-2, egl-4, pct-1, unc-43, mnk-1, max-2, cdk-7, rskn-2, csnk-1, wts-1, dlk-1, prk-1, tlk-1, cdk-5
GO.0030431..sleep	3.19379e-06	0.00242637	egl-4, pde-4, acy-1
GO.0040011..locomotion	8.17109e-06	0.00482821	soap-1, dhcr-7, lsy-2, pccb-1, sec-3, wapl-1, T26A8.4, unc-43, enpl-1, gex-3, unc-26, pqn-85, mdt-26, aakg-5, dyb-1, egl-30, lin-59, let-526, unc-94, ipgm-1, let-607, unc-14, jph-1, sin-3, lin-41, cel-1, nhr-49, csnk-1, wts-1, aex-5, mtm-3, xbp-1, emb-8, ddx-23, unc-116, zfp-1, tpst-1, Y39E4B.6
GO.0005524..ATP.binding	7.49318e-06	0.00482821	mlk-1, W07G4.3, ppk-3, akt-2, aak-2, egl-4, pct-1, unc-43, enpl-1, mel-46, R11F4.1, mnk-1, max-2, btf-1, cdk-7, xnp-1, rskn-2, csnk-1, wts-1, dlk-1, ddx-23, efk-1, prk-1, unc-116, tlk-1, ttll-4, klp-7, cdk-5
GO.0016740..transferase.activity	9.46864e-06	0.00503542	icl-1, hst-2, akt-2, acl-1, aak-2, egl-4, pct-1, unc-43, sms-1, R11F4.1, gst-5, ash-2, max-2, tps-2, cdk-7, lin-59, rskn-2, cel-1, csnk-1, wts-1, dlk-1, efk-1, ogt-1, tlk-1, tpst-1, cdk-5
GO.0005737..cytoplasm	1.37349e-05	0.0066402	atfs-1, rin-1, mut-15, Y43F8B.2, ppk-3, ZK1073.1, aak-2, egl-4, pct-1, unc-43, gex-3, ify-1, mnk-1, ldh-1, max-2, dyb-1, egl-30, unc-94, ipgm-1, wdr-23, rskn-2, lin-41, ikb-1, nhr-49, csnk-1, wts-1, pck-1, mtm-3, F25B5.3, prk-1, ogt-1, epg-4, F56C9.10, unc-116, Y39E4B.6, cdk-5
GO.0008340..determination.of.adult.lifespan	1.64274e-05	0.00728006	icl-1, mlk-1, folt-1, acs-17, mdl-1, nuc-1, akt-2, aak-2, egl-4, jmjd-1.2, nrfl-1, mdt-26, aka-1, gst-5, ash-2, max-2, tps-2, egl-30, lin-59, ipgm-1, wdr-23, cel-1, nhr-49, wts-1, pck-1, mtm-3, xbp-1, aldo-1
GO.0030424..axon	5.5581e-05	0.0227369	ppk-3, bra-1, aak-2, pct-1, unc-43, egl-21, egl-30, wdr-23, cdk-5
GO.0000166..nucleotide.binding	6.76122e-05	0.025683	akt-2, aak-2, egl-4, pct-1, unc-43, enpl-1, unc-26, mel-46, R11F4.1, mnk-1, ras-1, max-2, egl-30, cdk-7, xnp-1, rskn-2, cel-1, csnk-1, wts-1, dlk-1, ddx-23, F25B5.3, efk-1, prk-1, unc-116, tlk-1, ttll-4, klp-7, cdk-5
GO.0040018..positive.regulation.of.multicellular.organism.growth	9.40745e-05	0.031674	pccb-1, hst-2, ell-1, T26A8.4, unc-43, unc-26, nhr-61, W05F2.4, let-607, unc-14, wdr-23, lin-41, csnk-1, tlk-1, tpst-1
GO.0046777..protein.autophosphorylation	9.52959e-05	0.031674	mnk-1, dlk-1, prk-1, tlk-1
GO.0018105..peptidyl.serine.phosphorylation	0.000129345	0.040462	akt-2, aak-2, egl-4, unc-43, mnk-1, csnk-1, wts-1
GO.0030951..establishment.or.maintenance.of.microtubule.cytoskeleton.polarity	0.000217903	0.0579404	unc-116, cdk-5
GO.0004611..phosphoenolpyruvate.carboxykinase.activity	0.000217903	0.0579404	pck-2, pck-1
GO.0017076..purine.nucleotide.binding	0.000217903	0.0579404	pck-2, pck-1
GO.0019563..glycerol.catabolic.process	0.000647322	0.163927	R11F4.1, T25G3.4
GO.0072375..medium.term.memory	0.00128201	0.296423	unc-43, acy-1
GO.0006072..glycerol.3.phosphate.metabolic.process	0.00128201	0.296423	R11F4.1, T25G3.4
GO.0002119..nematode.larval.development	0.00159261	0.313685	soap-1, F25H9.6, dhcr-7, lsy-2, npp-8, eel-1, F20D12.2, nhr-66, T26A8.4, enpl-1, gex-3, mdt-26, aka-1, ash-2, cnt-1, nhr-61, egl-30, W05F2.4, lin-59, let-526, unc-94, ipgm-1, let-607, rskn-2, lin-41, cel-1, nhr-49, csnk-1, wts-1, dlk-1, dnj-29, aex-5, pck-1, mtm-3, xbp-1, acy-1, emb-8, ddx-23, epg-4, lin-13, zfp-1, tpst-1
GO.0005515..protein.binding	0.00146581	0.313685	Y43F8B.2, mdl-1, F41B4.1, rme-4, bra-1, akt-2, aak-2, Y41D4A.5, eel-1, sax-7, pct-1, T26A8.4, unc-43, gex-3, ify-1, ztf-17, nhr-19, dyb-1, unc-14, wdr-23, sin-3, ikb-1, nhr-49, tlk-1, athp-1
GO.0003824..catalytic.activity	0.00159183	0.313685	icl-1, aman-2, F25H9.6, acs-17, tre-2, atgp-1, ldh-1, tps-2, acs-13, dip-2, ipgm-1, cel-1, aldo-1
GO.0048489..synaptic.vesicle.transport	0.00155112	0.313685	unc-26, unc-116, cdk-5
GO.0018991..oviposition	0.00209189	0.351628	hst-2, egl-4, wapl-1, gex-3, egl-30, lin-59, let-526, ipgm-1, wdr-23, lin-41, scpl-1, csnk-1
GO.0046662..regulation.of.oviposition	0.00209844	0.351628	egl-4, egl-30, scpl-1, mtm-3
GO.1902474..positive.regulation.of.protein.localization.to.synapse	0.00211585	0.351628	gex-3, egl-30
GO.0006094..gluconeogenesis	0.00211585	0.351628	pck-2, pck-1
GO.0009931..calcium.dependent.protein.serine.threonine.kinase.activity	0.00211585	0.351628	unc-43, mnk-1
GO.0008270..zinc.ion.binding	0.00306852	0.477537	aman-2, spat-3, nhr-48, jmjd-1.2, nhr-66, egl-21, C01G6.4, nhr-19, F43G6.8, nhr-61, dyb-1, lin-59, C36B1.9, rbpl-1, lin-41, nhr-49, zfp-1, athp-1
GO.0015870..acetylcholine.transport	0.00314288	0.477537	unc-26, dyb-1
GO.0005977..glycogen.metabolic.process	0.00314288	0.477537	H18N23.2, ogt-1
GO.0040013..negative.regulation.of.locomotion	0.00454577	0.575581	pde-4, egl-30, acy-1
GO.0005634..nucleus	0.00443937	0.575581	saeg-1, atfs-1, nuc-1, bra-1, nhr-48, egl-4, ell-1, jmjd-1.2, nhr-66, pqn-85, mdt-26, nhr-19, mnk-1, ash-2, nhr-61, pcaf-1, lin-59, xnp-1, dip-2, let-526, pqn-21, taf-11.2, wdr-23, rbpl-1, cel-1, nhr-49, xbp-1, ddx-23, ogt-1, lin-13, zfp-1, tlk-1, Y39E4B.6
GO.0030512..negative.regulation.of.transforming.growth.factor.beta.receptor.signaling.pathway	0.00435724	0.575581	bra-1, egl-4
GO.0004683..calmodulin.dependent.protein.kinase.activity	0.00435724	0.575581	unc-43, mnk-1
GO.1903616..MAPK.cascade.involved.in.axon.regeneration	0.00435724	0.575581	mlk-1, dlk-1
GO.0046856..phosphatidylinositol.dephosphorylation	0.00435724	0.575581	unc-26, mtm-3
GO.0046688..response.to.copper.ion	0.00435724	0.575581	mlk-1, max-2
GO.0030425..dendrite	0.00505248	0.610662	bra-1, pct-1, max-2, cdk-5
GO.0016311..dephosphorylation	0.00505248	0.610662	pho-11, cel-1, scpl-1, F25B5.3
GO.0008286..insulin.receptor.signaling.pathway	0.00732523	0.611224	akt-2, egl-4
GO.0008406..gonad.development	0.00974878	0.611224	Y41D4A.5, ify-1, ash-2, nhr-61, xnp-1, let-526, lin-41, aex-5, ddx-23, epg-4, tlk-1
GO.0009792..embryo.development.ending.in.birth.or.egg.hatching	0.00717902	0.611224	dhcr-7, lsy-2, sec-3, acs-17, mdl-1, H18N23.2, npp-8, eel-1, wapl-1, jmjd-1.2, C02B10.5, C06G3.5, F20D12.2, sax-7, nhr-66, T26A8.4, enpl-1, gex-3, efa-6, pqn-85, ify-1, mdt-26, C01G6.5, aakg-5, ash-2, W02B8.2, nhr-61, cdk-7, F32B5.6, lin-59, xnp-1, dip-2, let-526, unc-94, ipgm-1, let-607, rskn-2, sin-3, rbpl-1, cel-1, nhr-49, csnk-1, wts-1, F22G12.4, dnj-29, aex-5, mtm-3, sax-2, emb-8, ddx-23, ep…
GO.0045202..synapse	0.00637781	0.611224	ric-7, unc-26, pde-4, dlk-1, unc-116, cdk-5
GO.0005622..intracellular	0.006245	0.611224	mlk-1, F46H5.4, nuc-1, rme-4, akt-2, eel-1, ras-1, W02B8.2, lin-41, cel-1, dlk-1, acy-1
GO.0035556..intracellular.signal.transduction	0.00784902	0.611224	akt-2, aak-2, mnk-1, W02B8.2, rskn-2, acy-1
GO.0040017..positive.regulation.of.locomotion	0.0147573	0.611224	dyb-1, egl-30, acy-1
GO.0030163..protein.catabolic.process	0.0146795	0.611224	egl-4, unc-26, egl-30, unc-94, aex-5, unc-116
GO.0035418..protein.localization.to.synapse	0.0130434	0.611224	unc-26, aex-5
GO.0005516..calmodulin.binding	0.0147573	0.611224	unc-43, mnk-1, efk-1
GO.0043025..neuronal.cell.body	0.00753695	0.611224	ppk-3, aak-2, egl-21, egl-30, wdr-23, dlk-1
GO.0045176..apical.protein.localization	0.00906781	0.611224	soap-1, wts-1
GO.0000122..negative.regulation.of.transcription.from.RNA.polymerase.II.promoter	0.0148266	0.611224	bra-1, wdr-23, sin-3, Y39E4B.6
GO.0008134..transcription.factor.binding	0.0147573	0.611224	dip-2, taf-11.2, wdr-23
GO.0019752..carboxylic.acid.metabolic.process	0.0130434	0.611224	icl-1, ldh-1
GO.0042393..histone.binding	0.00906781	0.611224	bra-1, jmjd-1.2
GO.0010940..positive.regulation.of.necrotic.cell.death	0.0130434	0.611224	unc-26, unc-116
GO.0004693..cyclin.dependent.protein.serine.threonine.kinase.activity	0.00575322	0.611224	pct-1, cdk-7
GO.0051222..positive.regulation.of.protein.transport	0.0147965	0.611224	cdk-5
GO.1902803..regulation.of.synaptic.vesicle.transport	0.0147965	0.611224	cdk-5
GO.0045448..mitotic.cell.cycle..embryonic	0.0147965	0.611224	cdk-7
GO.0031103..axon.regeneration	0.00906781	0.611224	mlk-1, dlk-1
GO.0004484..mRNA.guanylyltransferase.activity	0.0147965	0.611224	cel-1
GO.0004651..polynucleotide.5.phosphatase.activity	0.0147965	0.611224	cel-1
GO.0098507..polynucleotide.5.dephosphorylation	0.0147965	0.611224	cel-1
GO.0045214..sarcomere.organization	0.0109756	0.611224	dyb-1, unc-94
GO.0061067..negative.regulation.of.dauer.larval.development	0.00906781	0.611224	egl-4, wts-1
GO.0048677..axon.extension.involved.in.regeneration	0.0147965	0.611224	dlk-1
GO.0048689..formation.of.growth.cone.in.injured.axon	0.0147965	0.611224	dlk-1
GO.0007529..establishment.of.synaptic.specificity.at.neuromuscular.junction	0.0147965	0.611224	dyb-1
GO.0004686..elongation.factor.2.kinase.activity	0.0147965	0.611224	efk-1
GO.0004692..cGMP.dependent.protein.kinase.activity	0.0147965	0.611224	egl-4
GO.0046621..negative.regulation.of.organ.growth	0.0147965	0.611224	egl-4
GO.0051343..positive.regulation.of.cyclic.nucleotide.phosphodiesterase.activity	0.0147965	0.611224	egl-4
GO.0003958..NADPH.hemoprotein.reductase.activity	0.0147965	0.611224	emb-8
GO.0045933..positive.regulation.of.muscle.contraction	0.0147965	0.611224	unc-26
GO.0048365..Rac.GTPase.binding	0.00732523	0.611224	srgp-1, max-2
GO.0004451..isocitrate.lyase.activity	0.0147965	0.611224	icl-1
GO.0004474..malate.synthase.activity	0.0147965	0.611224	icl-1
GO.0006097..glyoxylate.cycle	0.0147965	0.611224	icl-1
GO.0004394..heparan.sulfate.2.O.sulfotransferase.activity	0.0147965	0.611224	hst-2
GO.0090619..meiotic.spindle.pole	0.0147965	0.611224	klp-7
GO.0004459..L.lactate.dehydrogenase.activity	0.0147965	0.611224	ldh-1
GO.0001715..ectodermal.cell.fate.specification	0.0147965	0.611224	lin-59
GO.0016312..inositol.bisphosphate.phosphatase.activity	0.0147965	0.611224	mtm-3
GO.0034594..phosphatidylinositol.trisphosphate.phosphatase.activity	0.0147965	0.611224	mtm-3
GO.0036003..positive.regulation.of.transcription.from.RNA.polymerase.II.promoter.in.response.to.stress	0.0147965	0.611224	nhr-49
GO.0006112..energy.reserve.metabolic.process	0.0147965	0.611224	ogt-1
GO.0016262..protein.N.acetylglucosaminyltransferase.activity	0.0147965	0.611224	ogt-1
GO.0016580..Sin3.complex	0.0147965	0.611224	sin-3
GO.0042058..regulation.of.epidermal.growth.factor.receptor.signaling.pathway	0.0147965	0.611224	rom-4
GO.0030427..site.of.polarized.growth	0.0147965	0.611224	sax-2
GO.0090527..actin.filament.reorganization	0.0147965	0.611224	sax-2
GO.0030506..ankyrin.binding	0.0147965	0.611224	sax-7
GO.0022409..positive.regulation.of.cell.cell.adhesion	0.0147965	0.611224	srgp-1
GO.0016050..vesicle.organization	0.0147965	0.611224	unc-26
GO.0097110..scaffold.protein.binding	0.0147965	0.611224	unc-14
GO.0097479..synaptic.vesicle.localization	0.0147965	0.611224	unc-14
GO.0016185..synaptic.vesicle.budding.from.presynaptic.endocytic.zone.membrane	0.0147965	0.611224	unc-26
GO.0016191..synaptic.vesicle.uncoating	0.0147965	0.611224	unc-26
GO.0043813..phosphatidylinositol.3.5.bisphosphate.5.phosphatase.activity	0.0147965	0.611224	unc-26
GO.0048212..Golgi.vesicle.uncoating	0.0147965	0.611224	unc-26
GO.0033206..meiotic.cytokinesis	0.0147965	0.611224	unc-116
GO.0046620..regulation.of.organ.growth	0.0147965	0.611224	wts-1
GO.0048621..post.embryonic.digestive.tract.morphogenesis	0.0147965	0.611224	wts-1
GO.0080135..regulation.of.cellular.response.to.stress	0.0147965	0.611224	wdr-23
GO.0051646..mitochondrion.localization	0.0147965	0.611224	ric-7
GO.0061544..peptide.secretion..neurotransmission	0.0147965	0.611224	ric-7
GO.0052590..sn.glycerol.3.phosphate.ubiquinone.oxidoreductase.activity	0.0147965	0.611224	T25G3.4
GO.0052591..sn.glycerol.3.phosphate.ubiquinone.8.oxidoreductase.activity	0.0147965	0.611224	T25G3.4
GO.0090217..negative.regulation.of.1.phosphatidylinositol.4.phosphate.5.kinase.activity	0.0147965	0.611224	csnk-1
GO.0006478..peptidyl.tyrosine.sulfation	0.0147965	0.611224	tpst-1
GO.0008476..protein.tyrosine.sulfotransferase.activity	0.0147965	0.611224	tpst-1
GO.0032963..collagen.metabolic.process	0.0147965	0.611224	tpst-1
GO.0004619..phosphoglycerate.mutase.activity	0.0147965	0.611224	ipgm-1
GO.0006007..glucose.catabolic.process	0.0147965	0.611224	ipgm-1
GO.0045875..negative.regulation.of.sister.chromatid.cohesion	0.0147965	0.611224	wapl-1
GO.0071922..regulation.of.cohesin.loading	0.0147965	0.611224	wapl-1
GO.0004370..glycerol.kinase.activity	0.0147965	0.611224	R11F4.1
GO.0046167..glycerol.3.phosphate.biosynthetic.process	0.0147965	0.611224	R11F4.1
GO.0006198..cAMP.catabolic.process	0.0147965	0.611224	pde-4
GO.0043951..negative.regulation.of.cAMP.mediated.signaling	0.0147965	0.611224	pde-4
GO.0004679..AMP.activated.protein.kinase.activity	0.0147965	0.611224	aak-2
GO.0031588..nucleotide.activated.protein.kinase.complex	0.0147965	0.611224	aak-2
GO.0032007..negative.regulation.of.TOR.signaling	0.0147965	0.611224	aak-2
GO.0051932..synaptic.transmission..GABAergic	0.0152661	0.619735	unc-43, cdk-5
GO.0032266..phosphatidylinositol.3.phosphate.binding	0.0152661	0.619735	ppk-3, aka-1
GO.0043005..neuron.projection	0.0164408	0.657384	unc-43, egl-30, unc-14, unc-116
GO.0000977..RNA.polymerase.II.regulatory.region.sequence.specific.DNA.binding	0.0164408	0.657384	atfs-1, bra-1, ztf-17, xbp-1
GO.0006355..regulation.of.transcription..DNA.templated	0.01735	0.688562	atfs-1, F46H5.4, nhr-48, jmjd-1.2, nhr-66, nhr-19, nhr-61, cdk-7, pcaf-1, lin-59, let-607, sin-3, nhr-49, xbp-1, tlk-1
GO.0018107..peptidyl.threonine.phosphorylation	0.0176387	0.694836	akt-2, unc-43
GO.0042995..cell.projection	0.023976	0.729983	pct-1, unc-43, max-2, cdk-5
GO.0030421..defecation	0.0287449	0.729983	folt-1, wts-1, aex-5
GO.0043565..sequence.specific.DNA.binding	0.0266739	0.729983	atfs-1, mdl-1, nhr-48, nhr-66, nhr-19, nhr-61, let-607, nhr-49, xbp-1
GO.0005975..carbohydrate.metabolic.process	0.0237069	0.729983	aman-2, H18N23.2, atgp-1, R11F4.1, ldh-1
GO.0045138..nematode.male.tail.tip.morphogenesis	0.0229376	0.729983	spat-3, lin-59, sin-3, lin-41
GO.0006464..cellular.protein.modification.process	0.0201564	0.729983	ogt-1, ttll-4
GO.0003682..chromatin.binding	0.0197399	0.729983	bra-1, lin-59, zfp-1
GO.0051965..positive.regulation.of.synapse.assembly	0.029375	0.729983	cdk-5
GO.1904799..regulation.of.neuron.remodeling	0.029375	0.729983	cdk-5
GO.1904810..negative.regulation.of.dense.core.granule.transport	0.029375	0.729983	cdk-5
GO.1904811..positive.regulation.of.dense.core.granule.transport	0.029375	0.729983	cdk-5
GO.2000331..regulation.of.terminal.button.organization	0.029375	0.729983	cdk-5
GO.0009299..mRNA.transcription	0.029375	0.729983	cdk-7
GO.0007413..axonal.fasciculation	0.0229376	0.729983	hst-2, lin-59, let-526, unc-116
GO.0042770..signal.transduction.in.response.to.DNA.damage	0.029375	0.729983	eel-1
GO.2001235..positive.regulation.of.apoptotic.signaling.pathway	0.029375	0.729983	cnt-1
GO.0005802..trans.Golgi.network	0.0285323	0.729983	efa-6, tpst-1
GO.0070700..BMP.receptor.binding	0.029375	0.729983	tig-2
GO.0016014..dystrobrevin.complex	0.029375	0.729983	dyb-1
GO.0018095..protein.polyglutamylation	0.029375	0.729983	ttll-4
GO.0006936..muscle.contraction	0.0228143	0.729983	unc-26, jph-1
GO.1902160..negative.regulation.of.cyclic.nucleotide.gated.ion.channel.activity	0.029375	0.729983	egl-4
GO.0014055..acetylcholine.secretion..neurotransmission	0.029375	0.729983	egl-21
GO.0030586...methionine.synthase..reductase.activity	0.029375	0.729983	emb-8
GO.0042308..negative.regulation.of.protein.import.into.nucleus	0.029375	0.729983	wts-1
GO.0051653..spindle.localization	0.029375	0.729983	csnk-1
GO.0044268..multicellular.organismal.protein.metabolic.process	0.029375	0.729983	lin-41
GO.0003384..apical.constriction.involved.in.gastrulation	0.029375	0.729983	sax-7
GO.1902667..regulation.of.axon.guidance	0.029375	0.729983	hst-2
GO.0090306..spindle.assembly.involved.in.meiosis	0.029375	0.729983	klp-7
GO.0090544..BAF.type.complex	0.029375	0.729983	let-526
GO.0030835..negative.regulation.of.actin.filament.depolymerization	0.029375	0.729983	unc-94
GO.0048566..embryonic.digestive.tract.development	0.029375	0.729983	lin-59
GO.0032116..SMC.loading.complex	0.029375	0.729983	pqn-85
GO.0010507..negative.regulation.of.autophagy	0.029375	0.729983	T28F4.5
GO.0052629..phosphatidylinositol.3.5.bisphosphate.3.phosphatase.activity	0.029375	0.729983	mtm-3
GO.0046855..inositol.phosphate.dephosphorylation	0.029375	0.729983	mtm-3
GO.0016529..sarcoplasmic.reticulum	0.0285323	0.729983	ccch-1, F57C2.5
GO.0019216..regulation.of.lipid.metabolic.process	0.029375	0.729983	nhr-49
GO.0019217..regulation.of.fatty.acid.metabolic.process	0.029375	0.729983	nhr-49
GO.0006493..protein.O.linked.glycosylation	0.029375	0.729983	ogt-1
GO.0032888..regulation.of.mitotic.spindle.elongation	0.029375	0.729983	csnk-1
GO.0045814..negative.regulation.of.gene.expression..epigenetic	0.029375	0.729983	spat-3
GO.0006893..Golgi.to.plasma.membrane.transport	0.029375	0.729983	sec-3
GO.0015812..gamma.aminobutyric.acid.transport	0.029375	0.729983	unc-26
GO.0070587..regulation.of.cell.cell.adhesion.involved.in.gastrulation	0.029375	0.729983	srgp-1
GO.0005523..tropomyosin.binding	0.029375	0.729983	unc-94
GO.0051694..pointed.end.actin.filament.capping	0.029375	0.729983	unc-94
GO.0003825..alpha.alpha.trehalose.phosphate.synthase..UDP.forming..activity	0.029375	0.729983	tps-2
GO.0019900..kinase.binding	0.029375	0.729983	scpl-1
GO.0044325..ion.channel.binding	0.029375	0.729983	unc-43
GO.0016844..strictosidine.synthase.activity	0.029375	0.729983	F57C2.5
GO.0030175..filopodium	0.029375	0.729983	rin-1
GO.0035175..histone.kinase.activity..H3.S10.specific.	0.029375	0.729983	rskn-2
GO.0043987..histone.H3.S10.phosphorylation	0.029375	0.729983	rskn-2
GO.0043988..histone.H3.S28.phosphorylation	0.029375	0.729983	rskn-2
GO.0033522..histone.H2A.ubiquitination	0.029375	0.729983	spat-3
GO.0070536..protein.K63.linked.deubiquitination	0.029375	0.729983	cyld-1
GO.0032228..regulation.of.synaptic.transmission..GABAergic	0.029375	0.729983	kcc-2
GO.0034198..cellular.response.to.amino.acid.starvation	0.029375	0.729983	T28F4.5
GO.0070513..death.domain.binding	0.029375	0.729983	T28F4.5
GO.0097190..apoptotic.signaling.pathway	0.029375	0.729983	T28F4.5
GO.0004332..fructose.bisphosphate.aldolase.activity	0.029375	0.729983	aldo-1
GO.0030643..cellular.phosphate.ion.homeostasis	0.029375	0.729983	gpcp-2
GO.0046475..glycerophospholipid.catabolic.process	0.029375	0.729983	gpcp-2
GO.0047389..glycerophosphocholine.phosphodiesterase.activity	0.029375	0.729983	gpcp-2
GO.2001070..starch.binding	0.029375	0.729983	gpcp-2
GO.0015377..cation.chloride.symporter.activity	0.029375	0.729983	kcc-2
GO.0032454..histone.demethylase.activity..H3.K9.specific.	0.029375	0.729983	jmjd-1.2
GO.0033169..histone.H3.K9.demethylation	0.029375	0.729983	jmjd-1.2
GO.0017049..GTP.Rho.binding	0.029375	0.729983	sec-3
GO.0006154..adenosine.catabolic.process	0.029375	0.729983	C06G3.5
GO.0043103..hypoxanthine.salvage	0.029375	0.729983	C06G3.5
GO.0046103..inosine.biosynthetic.process	0.029375	0.729983	C06G3.5
GO.0044262..cellular.carbohydrate.metabolic.process	0.029375	0.729983	ipgm-1
GO.0031248..protein.acetyltransferase.complex	0.029375	0.729983	F40F4.7
GO.0006071..glycerol.metabolic.process	0.029375	0.729983	R11F4.1
GO.0006641..triglyceride.metabolic.process	0.029375	0.729983	R11F4.1
GO.0042149..cellular.response.to.glucose.starvation	0.029375	0.729983	aak-2
GO.0000139..Golgi.membrane	0.0295921	0.731956	aman-2, hst-2, sms-1, tpst-1
GO.0005938..cell.cortex	0.0308009	0.758329	srgp-1, efa-6, csnk-1, sax-2
GO.0007268..chemical.synaptic.transmission	0.0315834	0.763457	kcc-2, cdk-5
GO.0030017..sarcomere	0.0315834	0.763457	sax-7, aldo-1
GO.0043065..positive.regulation.of.apoptotic.process	0.0315834	0.763457	eel-1, wts-1
GO.0051726..regulation.of.cell.cycle	0.0315834	0.763457	pct-1, cdk-7
GO.0040027..negative.regulation.of.vulval.development	0.0322234	0.768449	spat-3, ash-2, let-526, sin-3, lin-41, lin-13, zfp-1
GO.0042787..protein.ubiquitination.involved.in.ubiquitin.dependent.protein.catabolic.process	0.032154	0.768449	eel-1, lin-41, C09E7.7
GO.0007411..axon.guidance	0.0320385	0.768449	hst-2, gex-3, max-2, unc-116
GO.0010171..body.morphogenesis	0.0342734	0.813686	C02B10.5, F20D12.2, gex-3, pqn-85, mdt-26, let-526, ipgm-1, let-607, lin-41, cel-1, csnk-1, mtm-3, lin-13, unc-116
GO.0010467..gene.expression	0.0347568	0.821496	saeg-1, nhr-49
GO.0008152..metabolic.process	0.0353309	0.831371	icl-1, dhs-17, aman-2, F25H9.6, pccb-1, acs-17, acl-1, tre-2, lips-5, unc-26, atgp-1, pho-11, gst-5, acs-13, egl-30, pcaf-1, dip-2, ipgm-1, cel-1, unc-116, klp-7
GO.0016787..hydrolase.activity	0.0419606	0.836702	aman-2, nuc-1, Y41D4A.5, tre-2, lips-5, unc-26, mel-46, rom-4, pde-4, gpcp-2, pho-11, xnp-1, cel-1, mtm-3, ddx-23, F25B5.3
GO.1990357..terminal.web	0.0437389	0.836702	unc-94
GO.0007193..adenylate.cyclase.inhibiting.G.protein.coupled.receptor.signaling.pathway	0.0437389	0.836702	acy-1
GO.0008021..synaptic.vesicle	0.0380482	0.836702	unc-26, wdr-23
GO.0035174..histone.serine.kinase.activity	0.0437389	0.836702	aak-2
GO.0035404..histone.serine.phosphorylation	0.0437389	0.836702	aak-2
GO.0016485..protein.processing	0.0380482	0.836702	egl-21, rom-4
GO.0008081..phosphoric.diester.hydrolase.activity	0.0380482	0.836702	pde-4, gpcp-2
GO.1904576..response.to.tunicamycin	0.0437389	0.836702	xbp-1
GO.0005871..kinesin.complex	0.0414534	0.836702	unc-116, klp-7
GO.0000082..G1.S.transition.of.mitotic.cell.cycle	0.0437389	0.836702	wts-1
GO.0004861..cyclin.dependent.protein.serine.threonine.kinase.inhibitor.activity	0.0437389	0.836702	Y39E4B.6
GO.0071901..negative.regulation.of.protein.serine.threonine.kinase.activity	0.0437389	0.836702	Y39E4B.6
GO.0004531..deoxyribonuclease.II.activity	0.0437389	0.836702	nuc-1
GO.0046912..transferase.activity..transferring.acyl.groups..acyl.groups.converted.into.alkyl.on.transfer	0.0437389	0.836702	icl-1
GO.0036459..thiol.dependent.ubiquitinyl.hydrolase.activity	0.0380482	0.836702	duo-3, cyld-1
GO.0010753..positive.regulation.of.cGMP.mediated.signaling	0.0437389	0.836702	egl-4
GO.0006474..N.terminal.protein.amino.acid.acetylation	0.0437389	0.836702	F40F4.7
GO.0048188..Set1C.COMPASS.complex	0.0437389	0.836702	ash-2
GO.0030308..negative.regulation.of.cell.growth	0.0437389	0.836702	egl-4
GO.0035329..hippo.signaling	0.0437389	0.836702	wts-1
GO.0040021..hermaphrodite.germ.line.sex.determination	0.0437389	0.836702	ddx-23
GO.0045604..regulation.of.epidermal.cell.differentiation	0.0437389	0.836702	lin-41
GO.0005992..trehalose.biosynthetic.process	0.0437389	0.836702	tps-2
GO.0006096..glycolytic.process	0.0380482	0.836702	ipgm-1, aldo-1
GO.0001956..positive.regulation.of.neurotransmitter.secretion	0.0437389	0.836702	unc-26
GO.0007254..JNK.cascade	0.0437389	0.836702	max-2
GO.0016938..kinesin.I.complex	0.0437389	0.836702	unc-116
GO.0030274..LIM.domain.binding	0.0437389	0.836702	scpl-1
GO.0007028..cytoplasm.organization	0.0437389	0.836702	let-607
GO.0051020..GTPase.binding	0.0437389	0.836702	rin-1
GO.0034088..maintenance.of.mitotic.sister.chromatid.cohesion	0.0437389	0.836702	pqn-85
GO.0045807..positive.regulation.of.endocytosis	0.0437389	0.836702	mtm-3
GO.0048691..positive.regulation.of.axon.extension.involved.in.regeneration	0.0437389	0.836702	mlk-1
GO.0004438..phosphatidylinositol.3.phosphatase.activity	0.0437389	0.836702	mtm-3
GO.0016307..phosphatidylinositol.phosphate.kinase.activity	0.0437389	0.836702	ppk-3
GO.0017069..snRNA.binding	0.0437389	0.836702	Y39E4B.6
GO.0033188..sphingomyelin.synthase.activity	0.0437389	0.836702	sms-1
GO.0047493..ceramide.cholinephosphotransferase.activity	0.0437389	0.836702	sms-1
GO.0060101..negative.regulation.of.phagocytosis..engulfment	0.0437389	0.836702	srgp-1
GO.0005542..folic.acid.binding	0.0437389	0.836702	folt-1
GO.0004368..glycerol.3.phosphate.dehydrogenase.activity	0.0437389	0.836702	T25G3.4
GO.0009331..glycerol.3.phosphate.dehydrogenase.complex	0.0437389	0.836702	T25G3.4
GO.0004559..alpha.mannosidase.activity	0.0437389	0.836702	aman-2
GO.0006013..mannose.metabolic.process	0.0437389	0.836702	aman-2
GO.0015923..mannosidase.activity	0.0437389	0.836702	aman-2
GO.0003841..1.acylglycerol.3.phosphate.O.acyltransferase.activity	0.0437389	0.836702	acl-1
GO.0004115..3.5.cyclic.AMP.phosphodiesterase.activity	0.0437389	0.836702	pde-4
GO.0008253..5.nucleotidase.activity	0.0437389	0.836702	F25B5.3
GO.0051601..exocyst.localization	0.0437389	0.836702	sec-3
GO.0071557..histone.H3.K27.demethylation	0.0437389	0.836702	jmjd-1.2
GO.0071558..histone.demethylase.activity..H3.K27.specific.	0.0437389	0.836702	jmjd-1.2
GO.0055120..striated.muscle.dense.body	0.04448	0.84783	Y43F8B.2, wdr-23, pck-1, aldo-1
GO.0008080..N.acetyltransferase.activity	0.0449684	0.854078	F40F4.7, pcaf-1
GO.0040014..regulation.of.multicellular.organism.growth	0.0485892	0.913066	lin-59, let-607
GO.0010468..regulation.of.gene.expression	0.0485892	0.913066	eel-1, cdk-5
GO.0042594..response.to.starvation	0.0485892	0.913066	mlk-1, F56C9.10
GO.0043547..positive.regulation.of.GTPase.activity	0.0507641	0.950575	F46H5.4, srgp-1, efa-6, cnt-1
GO.0043204..perikaryon	0.052312	0.976124	unc-43, max-2
GO.0030336..negative.regulation.of.cell.migration	0.0578912	0.98992	srgp-1
GO.1901075..negative.regulation.of.engulfment.of.apoptotic.cell	0.0578912	0.98992	mtm-3
GO.0006171..cAMP.biosynthetic.process	0.0578912	0.98992	acy-1
GO.0019933..cAMP.mediated.signaling	0.0578912	0.98992	acy-1
GO.0004000..adenosine.deaminase.activity	0.0578912	0.98992	C06G3.5
GO.0006990..positive.regulation.of.transcription.from.RNA.polymerase.II.promoter.involved.in.unfolded.protein.response	0.0578912	0.98992	xbp-1
GO.0043169..cation.binding	0.0578912	0.98992	atgp-1
GO.0005675..holo.TFIIH.complex	0.0578912	0.98992	cdk-7
GO.0009957..epidermal.cell.fate.specification	0.0578912	0.98992	lin-41
GO.0001225..RNA.polymerase.II.transcription.coactivator.binding	0.0578912	0.98992	wts-1
GO.0010628..positive.regulation.of.gene.expression	0.056133	0.98992	atfs-1, cel-1
GO.0030553..cGMP.binding	0.0578912	0.98992	egl-4
GO.0000375..RNA.splicing..via.transesterification.reactions	0.0578912	0.98992	ddx-23
GO.0060158..phospholipase.C.activating.dopamine.receptor.signaling.pathway	0.0578912	0.98992	egl-30
GO.0048668..collateral.sprouting	0.0578912	0.98992	gex-3
GO.0015015..heparan.sulfate.proteoglycan.biosynthetic.process..enzymatic.modification	0.0578912	0.98992	hst-2
GO.0007257..activation.of.JUN.kinase.activity	0.0578912	0.98992	max-2
GO.0048813..dendrite.morphogenesis	0.0578912	0.98992	sax-7
GO.0048589..developmental.growth	0.0578912	0.98992	ddx-23
GO.0050708..regulation.of.protein.secretion	0.0578912	0.98992	rom-4
GO.0061062..regulation.of.nematode.larval.development	0.0578912	0.98992	tpst-1
GO.0015379..potassium.chloride.symporter.activity	0.0578912	0.98992	kcc-2
GO.0022820..potassium.ion.symporter.activity	0.0578912	0.98992	kcc-2
GO.0016126..sterol.biosynthetic.process	0.0578912	0.98992	dhcr-7
GO.0006517..protein.deglycosylation	0.0578912	0.98992	aman-2
GO.0008023..transcription.elongation.factor.complex	0.0578912	0.98992	ell-1
GO.0005623..cell	0.585772	1	gpcp-2
GO.0005942..phosphatidylinositol.3.kinase.complex	1	1	NA
GO.0019901..protein.kinase.binding	0.127863	1	mlk-1, unc-14
GO.0035014..phosphatidylinositol.3.kinase.regulator.activity	1	1	NA
GO.0040024..dauer.larval.development	0.546854	1	ogt-1
GO.0043551..regulation.of.phosphatidylinositol.3.kinase.activity	1	1	NA
GO.0046854..phosphatidylinositol.phosphorylation	0.176239	1	ppk-3
GO.0046935..1.phosphatidylinositol.3.kinase.regulator.activity	1	1	NA
GO.0003333..amino.acid.transmembrane.transport	1	1	NA
GO.0005886..plasma.membrane	0.335901	1	sec-3, sax-7, atgp-1, dyb-1, jph-1, csnk-1, wts-1, acy-1
GO.0015171..amino.acid.transmembrane.transporter.activity	1	1	NA
GO.0015179..L.amino.acid.transmembrane.transporter.activity	1	1	NA
GO.0015297..antiporter.activity	1	1	NA
GO.0015807..L.amino.acid.transport	1	1	NA
GO.0016020..membrane	0.99795	1	folt-1, aman-2, twk-24, dhcr-7, acs-17, M60.6, R07E3.4, hst-2, C03A3.2, F46G10.2, acl-1, W09G12.9, kcc-2, sax-7, T26A8.1, sms-1, rom-4, atgp-1, W07E6.5, pde-4, C47G2.4, ras-1, F57C2.5, jph-1, ZK858.6, wts-1, dnj-29, mtm-3, acy-1, emb-8, epg-4, C07H6.9, C03B8.3, svop-1, tpst-1
GO.0016021..integral.component.of.membrane	0.998913	1	folt-1, aman-2, twk-24, dhcr-7, acs-17, M60.6, R07E3.4, hst-2, C03A3.2, F46G10.2, acl-1, W09G12.9, kcc-2, sax-7, T26A8.1, sms-1, rom-4, atgp-1, W07E6.5, pde-4, C47G2.4, jph-1, ZK858.6, dnj-29, acy-1, emb-8, epg-4, C07H6.9, C03B8.3, svop-1, tpst-1
GO.1902475..L.alpha.amino.acid.transmembrane.transport	1	1	NA
GO.1990184..amino.acid.transport.complex	1	1	NA
GO.0019915..lipid.storage	0.2519	1	npp-8, F20D12.2, nhr-66, enpl-1, C01G6.5, cnt-1, cel-1, nhr-49, ogt-1
GO.0009986..cell.surface	1	1	NA
GO.0000003..reproduction	0.376583	1	folt-1, F25H9.6, dhcr-7, lsy-2, spat-3, C02B10.5, F20D12.2, T26A8.4, enpl-1, gex-3, ify-1, egl-30, W05F2.4, lin-59, xnp-1, let-526, ipgm-1, let-607, lin-41, cel-1, nhr-49, csnk-1, emb-8, ddx-23, ogt-1, epg-4, lin-13, zfp-1, tlk-1, athp-1, tpst-1, cdk-5
GO.0000278..mitotic.cell.cycle	1	1	NA
GO.0040025..vulval.development	0.0743453	1	ras-1, xnp-1, sin-3, lin-13
GO.0040026..positive.regulation.of.vulval.development	1	1	NA
GO.0040035..hermaphrodite.genitalia.development	0.147656	1	lsy-2, npp-8, T26A8.4, gex-3, ify-1, aakg-5, ash-2, W05F2.4, xnp-1, let-526, csnk-1, ddx-23, zfp-1, tpst-1
GO.0005576..extracellular.region	0.978749	1	tig-2
GO.0098542..defense.response.to.other.organism	1	1	NA
GO.0003674..molecular_function	0.197431	1	soap-1, ric-7, lin-41, lin-13
GO.0006952..defense.response	0.13823	1	unc-43, ikb-1, acy-1
GO.0031640..killing.of.cells.of.other.organism	1	1	NA
GO.0042742..defense.response.to.bacterium	1	1	NA
GO.0050829..defense.response.to.Gram.negative.bacterium	0.669121	1	ikb-1
GO.0050830..defense.response.to.Gram.positive.bacterium	1	1	NA
GO.0050832..defense.response.to.fungus	1	1	NA
GO.0000077..DNA.damage.checkpoint	1	1	NA
GO.0004713..protein.tyrosine.kinase.activity	1	1	NA
GO.0004715..non.membrane.spanning.protein.tyrosine.kinase.activity	1	1	NA
GO.0005102..receptor.binding	0.489248	1	bra-1
GO.0006915..apoptotic.process	0.335901	1	nuc-1, eel-1, ify-1, gst-5, xnp-1, let-526, let-607, lin-41
GO.0007169..transmembrane.receptor.protein.tyrosine.kinase.signaling.pathway	1	1	NA
GO.0007283..spermatogenesis	1	1	NA
GO.0010212..response.to.ionizing.radiation	1	1	NA
GO.0030154..cell.differentiation	0.897527	1	max-2
GO.0031234..extrinsic.component.of.cytoplasmic.side.of.plasma.membrane	0.321539	1	egl-30
GO.0038083..peptidyl.tyrosine.autophosphorylation	1	1	NA
GO.0042127..regulation.of.cell.proliferation	0.514374	1	ddx-23, epg-4
GO.0043066..negative.regulation.of.apoptotic.process	1	1	NA
GO.0043518..negative.regulation.of.DNA.damage.response..signal.transduction.by.p53.class.mediator	1	1	NA
GO.0045087..innate.immune.response	0.492237	1	Y43F8B.2, F18H3.4, akt-2, gst-5
GO.0005215..transporter.activity	0.432054	1	R07E3.4, kcc-2
GO.0006810..transport	0.945062	1	folt-1, twk-24, sec-3, R07E3.4, kcc-2, svop-1
GO.0006869..lipid.transport	1	1	NA
GO.0016246..RNA.interference	0.346934	1	mut-15, sin-3, zfp-1
GO.0016887..ATPase.activity	0.765653	1	klp-7
GO.0042626..ATPase.activity..coupled.to.transmembrane.movement.of.substances	1	1	NA
GO.0043231..intracellular.membrane.bounded.organelle	1	1	NA
GO.0055085..transmembrane.transport	0.787276	1	folt-1, R07E3.4, kcc-2, svop-1
GO.0040020..regulation.of.meiotic.nuclear.division	0.332147	1	ddx-23, epg-4
GO.0030176..integral.component.of.endoplasmic.reticulum.membrane	0.22397	1	dhcr-7
GO.0030968..endoplasmic.reticulum.unfolded.protein.response	0.540023	1	xbp-1
GO.0060465..pharynx.development	0.3797	1	wts-1
GO.0001507..acetylcholine.catabolic.process.in.synaptic.cleft	1	1	NA
GO.0003990..acetylcholinesterase.activity	1	1	NA
GO.0004104..cholinesterase.activity	1	1	NA
GO.0005615..extracellular.space	0.805765	1	tig-2, egl-21
GO.0006581..acetylcholine.catabolic.process	1	1	NA
GO.0030054..cell.junction	0.563307	1	gex-3, dlk-1
GO.0040012..regulation.of.locomotion	0.08533	1	jmjd-1.2, tpst-1
GO.0042135..neurotransmitter.catabolic.process	1	1	NA
GO.0042802..identical.protein.binding	0.591927	1	aldo-1
GO.0043083..synaptic.cleft	1	1	NA
GO.0052689..carboxylic.ester.hydrolase.activity	1	1	NA
GO.0007271..synaptic.transmission..cholinergic	0.579525	1	dyb-1
GO.0042803..protein.homodimerization.activity	1	1	NA
GO.0035188..hatching	0.174168	1	ify-1, unc-116
GO.0043058..regulation.of.backward.locomotion	0.112446	1	unc-26
GO.0046983..protein.dimerization.activity	0.457768	1	mdl-1
GO.0050879..multicellular.organismal.movement	1	1	NA
GO.0006508..proteolysis	0.81757	1	egl-21, rom-4, aex-5
GO.0008237..metallopeptidase.activity	1	1	NA
GO.0008241..peptidyl.dipeptidase.activity	1	1	NA
GO.0018996..molting.cycle..collagen.and.cuticulin.based.cuticle	0.75047	1	pccb-1, lin-41, cel-1
GO.0003723..RNA.binding	1	1	NA
GO.0003994..aconitate.hydratase.activity	1	1	NA
GO.0005829..cytosol	0.71696	1	egl-4, cyld-1
GO.0006099..tricarboxylic.acid.cycle	0.311331	1	icl-1
GO.0006879..cellular.iron.ion.homeostasis	1	1	NA
GO.0016829..lyase.activity	0.288484	1	icl-1, aldo-1
GO.0051536..iron.sulfur.cluster.binding	1	1	NA
GO.0051539..4.iron..4.sulfur.cluster.binding	1	1	NA
GO.0072350..tricarboxylic.acid.metabolic.process	1	1	NA
GO.0005739..mitochondrion	0.6314	1	icl-1, ric-7, R11F4.1, T25G3.4, wdr-23
GO.0004889..acetylcholine.activated.cation.selective.channel.activity	1	1	NA
GO.0005216..ion.channel.activity	1	1	NA
GO.0005230..extracellular.ligand.gated.ion.channel.activity	1	1	NA
GO.0005231..excitatory.extracellular.ligand.gated.ion.channel.activity	1	1	NA
GO.0005892..acetylcholine.gated.channel.complex	1	1	NA
GO.0006811..ion.transport	0.925659	1	twk-24, kcc-2
GO.0007274..neuromuscular.synaptic.transmission	1	1	NA
GO.0015464..acetylcholine.receptor.activity	1	1	NA
GO.0035094..response.to.nicotine	1	1	NA
GO.0042166..acetylcholine.binding	1	1	NA
GO.0045211..postsynaptic.membrane	1	1	NA
GO.0098655..cation.transmembrane.transport	1	1	NA
GO.0098662..inorganic.cation.transmembrane.transport	1	1	NA
GO.0098703..calcium.ion.import.across.plasma.membrane	1	1	NA
GO.0034220..ion.transmembrane.transport	1	1	NA
GO.0000281..mitotic.cytokinesis	1	1	NA
GO.0000910..cytokinesis	0.496829	1	klp-7
GO.0005200..structural.constituent.of.cytoskeleton	1	1	NA
GO.0005856..cytoskeleton	0.642987	1	unc-94, unc-116
GO.0006898..receptor.mediated.endocytosis	0.126532	1	soap-1, F25H9.6, enpl-1, gex-3, mel-46, ify-1, mdt-26, lin-59, let-526, let-607, lin-41, cel-1, nhr-49, epg-4
GO.0007517..muscle.organ.development	1	1	NA
GO.0030036..actin.cytoskeleton.organization	0.22397	1	max-2
GO.0030866..cortical.actin.cytoskeleton.organization	1	1	NA
GO.0040007..growth	0.415115	1	W05F2.4, emb-8, epg-4
GO.0040039..inductive.cell.migration	0.596626	1	gex-3, max-2
GO.0071688..striated.muscle.myosin.thick.filament.assembly	0.326672	1	ric-7, pqn-85, ztf-17
GO.0005884..actin.filament	1	1	NA
GO.0007111..meiosis.II.cytokinesis	1	1	NA
GO.0005865..striated.muscle.thin.filament	0.138533	1	unc-94
GO.0045121..membrane.raft	0.533089	1	F54E2.1
GO.0030033..microvillus.assembly	1	1	NA
GO.0035148..tube.formation	1	1	NA
GO.0097516..microvillar.actin.bundle	1	1	NA
GO.0004016..adenylate.cyclase.activity	0.311331	1	acy-1
GO.0006935..chemotaxis	0.08533	1	egl-4, acy-1
GO.0007188..adenylate.cyclase.modulating.G.protein.coupled.receptor.signaling.pathway	0.212302	1	acy-1
GO.0007189..adenylate.cyclase.activating.G.protein.coupled.receptor.signaling.pathway	0.0991094	1	acy-1
GO.0007614..short.term.memory	0.0991094	1	acy-1
GO.0008219..cell.death	0.406892	1	acy-1
GO.0009190..cyclic.nucleotide.biosynthetic.process	0.311331	1	acy-1
GO.0016849..phosphorus.oxygen.lyase.activity	0.311331	1	acy-1
GO.0004383..guanylate.cyclase.activity	1	1	NA
GO.0006182..cGMP.biosynthetic.process	1	1	NA
GO.0007165..signal.transduction	0.227915	1	ZK1073.1, srgp-1, pde-4, ras-1, egl-30, ikb-1
GO.0008294..calcium..and.calmodulin.responsive.adenylate.cyclase.activity	1	1	NA
GO.0090038..negative.regulation.of.protein.kinase.C.signaling	0.0991094	1	let-607
GO.2000114..regulation.of.establishment.of.cell.polarity	0.0991094	1	let-607
GO.0007186..G.protein.coupled.receptor.signaling.pathway	0.911867	1	egl-30
GO.1900195..positive.regulation.of.oocyte.maturation	1	1	NA
GO.0003779..actin.binding	0.62699	1	unc-94
GO.0007613..memory	1	1	NA
GO.0007616..long.term.memory	1	1	NA
GO.0014069..postsynaptic.density	1	1	NA
GO.0051015..actin.filament.binding	0.360887	1	unc-94
GO.0051016..barbed.end.actin.filament.capping	1	1	NA
GO.0097120..receptor.localization.to.synapse	1	1	NA
GO.2000249..regulation.of.actin.cytoskeleton.reorganization	1	1	NA
GO.0004222..metalloendopeptidase.activity	1	1	NA
GO.0007229..integrin.mediated.signaling.pathway	1	1	NA
GO.0008233..peptidase.activity	0.937716	1	rom-4
GO.0022401..negative.adaptation.of.signaling.pathway	1	1	NA
GO.0046959..habituation	1	1	NA
GO.0006382..adenosine.to.inosine.editing	1	1	NA
GO.0006396..RNA.processing	1	1	NA
GO.0022626..cytosolic.ribosome	1	1	NA
GO.0048477..oogenesis	0.757036	1	folt-1, emb-8
GO.0006397..mRNA.processing	0.643381	1	cel-1
GO.0005777..peroxisome	1	1	NA
GO.0006629..lipid.metabolic.process	0.116273	1	acl-1, aak-2, sms-1, gpcp-2, mtm-3
GO.0008609..alkylglycerone.phosphate.synthase.activity	1	1	NA
GO.0008610..lipid.biosynthetic.process	0.071835	1	emb-8
GO.0008611..ether.lipid.biosynthetic.process	1	1	NA
GO.0016491..oxidoreductase.activity	0.733639	1	dhs-17, jmjd-1.2, ldh-1, T25G3.4, emb-8
GO.0016614..oxidoreductase.activity..acting.on.CH.OH.group.of.donors	1	1	NA
GO.0050660..flavin.adenine.dinucleotide.binding	1	1	NA
GO.0055114..oxidation.reduction.process	0.754138	1	dhs-17, dhcr-7, jmjd-1.2, ldh-1, T25G3.4, emb-8
GO.0071949..FAD.binding	1	1	NA
GO.0008361..regulation.of.cell.size	0.0855734	1	let-607
GO.0030199..collagen.fibril.organization	1	1	NA
GO.0043652..engulfment.of.apoptotic.cell	0.128165	1	Y41D4A.5, jph-1, sax-2
GO.0004871..signal.transducer.activity	0.769145	1	egl-30
GO.0014057..positive.regulation.of.acetylcholine.secretion..neurotransmission	0.112446	1	egl-30
GO.0016079..synaptic.vesicle.exocytosis	1	1	NA
GO.0060179..male.mating.behavior	1	1	NA
GO.0004930..G.protein.coupled.receptor.activity	1	1	NA
GO.0007218..neuropeptide.signaling.pathway	1	1	NA
GO.0008188..neuropeptide.receptor.activity	1	1	NA
GO.2000294..positive.regulation.of.defecation	1	1	NA
GO.0005085..guanyl.nucleotide.exchange.factor.activity	0.321539	1	F46H5.4
GO.0007618..mating	1	1	NA
GO.0017112..Rab.guanyl.nucleotide.exchange.factor.activity	1	1	NA
GO.0004252..serine.type.endopeptidase.activity	0.0600485	1	rom-4, aex-5
GO.0003924..GTPase.activity	0.471753	1	ras-1, egl-30
GO.0005525..GTP.binding	0.116273	1	ras-1, egl-30, pck-2, cel-1, pck-1
GO.0006886..intracellular.protein.transport	0.779312	1	ras-1
GO.0006913..nucleocytoplasmic.transport	0.0989731	1	npp-8, ras-1
GO.0007264..small.GTPase.mediated.signal.transduction	0.321287	1	F46H5.4, ras-1
GO.0015031..protein.transport	0.762345	1	sec-3, ras-1
GO.0030141..secretory.granule	1	1	NA
GO.0032402..melanosome.transport	1	1	NA
GO.0042470..melanosome	1	1	NA
GO.0045921..positive.regulation.of.exocytosis	1	1	NA
GO.0090522..vesicle.tethering.involved.in.exocytosis	1	1	NA
GO.1903364..positive.regulation.of.cellular.protein.catabolic.process	1	1	NA
GO.1990504..dense.core.granule.exocytosis	0.071835	1	ric-7
GO.0002250..adaptive.immune.response	1	1	NA
GO.0006954..inflammatory.response	1	1	NA
GO.0006979..response.to.oxidative.stress	1	1	NA
GO.0007568..aging	1	1	NA
GO.0007611..learning.or.memory	1	1	NA
GO.0014065..phosphatidylinositol.3.kinase.signaling	1	1	NA
GO.0016303..1.phosphatidylinositol.3.kinase.activity	1	1	NA
GO.0016773..phosphotransferase.activity..alcohol.group.as.acceptor	0.268948	1	R11F4.1
GO.0030168..platelet.activation	1	1	NA
GO.0031513..nonmotile.primary.cilium	1	1	NA
GO.0035005..1.phosphatidylinositol.4.phosphate.3.kinase.activity	1	1	NA
GO.0036092..phosphatidylinositol.3.phosphate.biosynthetic.process	0.0991094	1	unc-26
GO.0043053..dauer.entry	0.432898	1	mfb-1
GO.0046686..response.to.cadmium.ion	1	1	NA
GO.0048015..phosphatidylinositol.mediated.signaling	1	1	NA
GO.0050919..negative.chemotaxis	0.125586	1	egl-30
GO.0050920..regulation.of.chemotaxis	1	1	NA
GO.0060326..cell.chemotaxis	1	1	NA
GO.1901047..insulin.receptor.signaling.pathway.involved.in.determination.of.adult.lifespan	1	1	NA
GO.0001965..G.protein.alpha.subunit.binding	1	1	NA
GO.0005096..GTPase.activator.activity	0.148081	1	srgp-1, cnt-1
GO.0030695..GTPase.regulator.activity	1	1	NA
GO.0050790..regulation.of.catalytic.activity	1	1	NA
GO.0060259..regulation.of.feeding.behavior	1	1	NA
GO.0003684..damaged.DNA.binding	1	1	NA
GO.0003908..methylated.DNA..protein..cysteine.S.methyltransferase.activity	1	1	NA
GO.0006281..DNA.repair	0.706513	1	xnp-1
GO.0006307..DNA.dealkylation.involved.in.DNA.repair	1	1	NA
GO.0016765..transferase.activity..transferring.alkyl.or.aryl..other.than.methyl..groups	1	1	NA
GO.0032259..methylation	0.359067	1	ash-2, lin-59
GO.0001085..RNA.polymerase.II.transcription.factor.binding	1	1	NA
GO.0001708..cell.fate.specification	0.518908	1	sin-3
GO.0003677..DNA.binding	0.270415	1	saeg-1, nhr-48, nhr-66, mdt-26, nhr-19, nhr-61, xnp-1, let-526, nhr-49, lin-13, zfp-1
GO.0003700..transcription.factor.activity..sequence.specific.DNA.binding	0.142036	1	atfs-1, nhr-48, nhr-66, nhr-19, nhr-61, let-607, nhr-49, xbp-1
GO.0005667..transcription.factor.complex	0.351268	1	mdl-1
GO.0006351..transcription..DNA.templated	0.0704218	1	nhr-48, jmjd-1.2, nhr-66, mdt-26, nhr-19, ash-2, nhr-61, cdk-7, lin-59, nhr-49, tlk-1
GO.0006366..transcription.from.RNA.polymerase.II.promoter	1	1	NA
GO.0007275..multicellular.organism.development	0.0850057	1	hst-2, akt-2, egl-4, gex-3, lin-41, wts-1, mtm-3, lin-13, tlk-1
GO.0009410..response.to.xenobiotic.stimulus	1	1	NA
GO.0022008..neurogenesis	1	1	NA
GO.0030522..intracellular.receptor.signaling.pathway	1	1	NA
GO.0035176..social.behavior	1	1	NA
GO.0045944..positive.regulation.of.transcription.from.RNA.polymerase.II.promoter	0.132258	1	lin-59, let-526, rskn-2, nhr-49
GO.0090575..RNA.polymerase.II.transcription.factor.complex	1	1	NA
GO.0004874..aryl.hydrocarbon.receptor.activity	1	1	NA
GO.0007399..nervous.system.development	0.277501	1	max-2, cdk-5
GO.0007416..synapse.assembly	1	1	NA
GO.0007610..behavior	1	1	NA
GO.0034753..nuclear.aryl.hydrocarbon.receptor.complex	1	1	NA
GO.0046685..response.to.arsenic.containing.substance	1	1	NA
GO.0071218..cellular.response.to.misfolded.protein	1	1	NA
GO.0000235..astral.microtubule	1	1	NA
GO.0000780..condensed.nuclear.chromosome..centromeric.region	1	1	NA
GO.0000794..condensed.nuclear.chromosome	1	1	NA
GO.0005813..centrosome	0.553584	1	klp-7
GO.0005828..kinetochore.microtubule	1	1	NA
GO.0007020..microtubule.nucleation	0.138533	1	klp-7
GO.0007049..cell.cycle	0.109648	1	pqn-85, cdk-7, csnk-1, cdk-5
GO.0031616..spindle.pole.centrosome	1	1	NA
GO.0032133..chromosome.passenger.complex	1	1	NA
GO.0032465..regulation.of.cytokinesis	1	1	NA
GO.0040002..collagen.and.cuticulin.based.cuticle.development	0.17355	1	ell-1, mtm-3, tpst-1
GO.0051233..spindle.midzone	1	1	NA
GO.0090307..mitotic.spindle.assembly	1	1	NA
GO.1904781..positive.regulation.of.protein.localization.to.centrosome	1	1	NA
GO.0000793..condensed.chromosome	0.0681487	1	ify-1, klp-7
GO.0005694..chromosome	0.688374	1	klp-7
GO.0005819..spindle	1	1	NA
GO.0005876..spindle.microtubule	0.138533	1	ify-1
GO.0007059..chromosome.segregation	1	1	NA
GO.0007067..mitotic.nuclear.division	0.42698	1	unc-43, klp-7
GO.0007126..meiotic.nuclear.division	0.218793	1	sec-3, srgp-1, ify-1
GO.0007281..germ.cell.development	0.725988	1	ddx-23, epg-4
GO.0016568..chromatin.modification	0.174168	1	jmjd-1.2, lin-59
GO.0019894..kinesin.binding	1	1	NA
GO.0030261..chromosome.condensation	1	1	NA
GO.0030496..midbody	1	1	NA
GO.0031991..regulation.of.actomyosin.contractile.ring.contraction	1	1	NA
GO.0045184..establishment.of.protein.localization	1	1	NA
GO.0051117..ATPase.binding	1	1	NA
GO.0051256..mitotic.spindle.midzone.assembly	1	1	NA
GO.0051301..cell.division	0.238318	1	cdk-7, csnk-1, cdk-5
GO.0051321..meiotic.cell.cycle	1	1	NA
GO.0005913..cell.cell.adherens.junction	0.176239	1	sax-7
GO.0008092..cytoskeletal.protein.binding	0.176239	1	dyb-1
GO.0016327..apicolateral.plasma.membrane	1	1	NA
GO.0043296..apical.junction.complex	1	1	NA
GO.0044292..dendrite.terminus	1	1	NA
GO.0045216..cell.cell.junction.organization	1	1	NA
GO.0002376..immune.system.process	0.112446	1	akt-2
GO.0042771..intrinsic.apoptotic.signaling.pathway.in.response.to.DNA.damage.by.p53.class.mediator	1	1	NA
GO.0000932..cytoplasmic.mRNA.processing.body	1	1	NA
GO.0003676..nucleic.acid.binding	0.363319	1	lsy-2, mel-46, ztf-17, pqn-21, rbpl-1, ddx-23, lin-13
GO.0003725..double.stranded.RNA.binding	1	1	NA
GO.0003727..single.stranded.RNA.binding	1	1	NA
GO.0016892..endoribonuclease.activity..producing.3.phosphomonoesters	1	1	NA
GO.0035068..micro.ribonucleoprotein.complex	1	1	NA
GO.0035196..production.of.miRNAs.involved.in.gene.silencing.by.miRNA	1	1	NA
GO.0035198..miRNA.binding	1	1	NA
GO.0035279..mRNA.cleavage.involved.in.gene.silencing.by.miRNA	1	1	NA
GO.0070551..endoribonuclease.activity..cleaving.siRNA.paired.mRNA	1	1	NA
GO.0070922..small.RNA.loading.onto.RISC	1	1	NA
GO.0090502..RNA.phosphodiester.bond.hydrolysis..endonucleolytic	1	1	NA
GO.0004029..aldehyde.dehydrogenase..NAD..activity	1	1	NA
GO.0016620..oxidoreductase.activity..acting.on.the.aldehyde.or.oxo.group.of.donors..NAD.or.NADP.as.acceptor	1	1	NA
GO.0048871..multicellular.organismal.homeostasis	1	1	NA
GO.0006730..one.carbon.metabolic.process	1	1	NA
GO.0009058..biosynthetic.process	0.360887	1	F57C2.5
GO.0009258..10.formyltetrahydrofolate.catabolic.process	1	1	NA
GO.0016155..formyltetrahydrofolate.dehydrogenase.activity	1	1	NA
GO.0016742..hydroxymethyl...formyl..and.related.transferase.activity	1	1	NA
GO.0019145..aminobutyraldehyde.dehydrogenase.activity	1	1	NA
GO.0047105..4.trimethylammoniobutyraldehyde.dehydrogenase.activity	1	1	NA
GO.0004028..3.chloroallyl.aldehyde.dehydrogenase.activity	1	1	NA
GO.0004030..aldehyde.dehydrogenase..NAD.P....activity	1	1	NA
GO.0006081..cellular.aldehyde.metabolic.process	1	1	NA
GO.0003842..1.pyrroline.5.carboxylate.dehydrogenase.activity	1	1	NA
GO.0006537..glutamate.biosynthetic.process	1	1	NA
GO.0006561..proline.biosynthetic.process	1	1	NA
GO.0032502..developmental.process	1	1	NA
GO.0004777..succinate.semialdehyde.dehydrogenase..NAD...activity	1	1	NA
GO.0009013..succinate.semialdehyde.dehydrogenase..NAD.P....activity	1	1	NA
GO.0000062..fatty.acyl.CoA.binding	1	1	NA
GO.0004491..methylmalonate.semialdehyde.dehydrogenase..acylating..activity	1	1	NA
GO.0006573..valine.metabolic.process	1	1	NA
GO.0018478..malonate.semialdehyde.dehydrogenase..acetylating..activity	1	1	NA
GO.0019859..thymine.metabolic.process	1	1	NA
GO.0005575..cellular_component	0.789033	1	gst-5
GO.0001055..RNA.polymerase.II.activity	1	1	NA
GO.0003899..DNA.directed.RNA.polymerase.activity	1	1	NA
GO.0005665..DNA.directed.RNA.polymerase.II..core.complex	1	1	NA
GO.0006479..protein.methylation	0.200459	1	tlk-1
GO.0007052..mitotic.spindle.organization	0.603965	1	ify-1
GO.0007369..gastrulation	1	1	NA
GO.0008356..asymmetric.cell.division	0.360887	1	csnk-1
GO.0010458..exit.from.mitosis	1	1	NA
GO.0016779..nucleotidyltransferase.activity	0.465814	1	cel-1
GO.0042789..mRNA.transcription.from.RNA.polymerase.II.promoter	1	1	NA
GO.0005887..integral.component.of.plasma.membrane	0.903968	1	folt-1, twk-24
GO.0006995..cellular.response.to.nitrogen.starvation	1	1	NA
GO.0008519..ammonium.transmembrane.transporter.activity	1	1	NA
GO.0015695..organic.cation.transport	1	1	NA
GO.0015696..ammonium.transport	1	1	NA
GO.0019740..nitrogen.utilization	1	1	NA
GO.0072488..ammonium.transmembrane.transport	0.151288	1	dyb-1
GO.0034648..histone.demethylase.activity..H3.dimethyl.K4.specific.	1	1	NA
GO.0034720..histone.H3.K4.demethylation	1	1	NA
GO.0005635..nuclear.envelope	0.432898	1	unc-116
GO.0005640..nuclear.outer.membrane	1	1	NA
GO.0007010..cytoskeleton.organization	0.0855734	1	unc-26
GO.0035046..pronuclear.migration	0.553584	1	gex-3
GO.0051087..chaperone.binding	1	1	NA
GO.0051179..localization	1	1	NA
GO.0002143..tRNA.wobble.position.uridine.thiolation	1	1	NA
GO.0004792..thiosulfate.sulfurtransferase.activity	1	1	NA
GO.0008641..small.protein.activating.enzyme.activity	1	1	NA
GO.0016874..ligase.activity	0.250174	1	eel-1, rbpl-1, ttll-4
GO.0016925..protein.sumoylation	1	1	NA
GO.0018117..protein.adenylylation	1	1	NA
GO.0019948..SUMO.activating.enzyme.activity	1	1	NA
GO.0031510..SUMO.activating.enzyme.complex	1	1	NA
GO.0032447..protein.urmylation	1	1	NA
GO.0042292..URM1.activating.enzyme.activity	1	1	NA
GO.0070733..protein.adenylyltransferase.activity	1	1	NA
GO.0005680..anaphase.promoting.complex	1	1	NA
GO.0006511..ubiquitin.dependent.protein.catabolic.process	0.560215	1	Y38C1AA.12
GO.0031625..ubiquitin.protein.ligase.binding	1	1	NA
GO.0061630..ubiquitin.protein.ligase.activity	0.579525	1	C09E7.7
GO.0004842..ubiquitin.protein.transferase.activity	0.228099	1	eel-1, lin-41
GO.0008054..negative.regulation.of.cyclin.dependent.protein.serine.threonine.kinase.by.cyclin.degradation	1	1	NA
GO.0045132..meiotic.chromosome.segregation	0.545926	1	srgp-1, klp-7
GO.0045842..positive.regulation.of.mitotic.metaphase.anaphase.transition	1	1	NA
GO.0097602..cullin.family.protein.binding	1	1	NA
GO.0002039..p53.binding	1	1	NA
GO.0007219..Notch.signaling.pathway	1	1	NA
GO.0034394..protein.localization.to.cell.surface	1	1	NA
GO.0043085..positive.regulation.of.catalytic.activity	1	1	NA
GO.0045165..cell.fate.commitment	1	1	NA
GO.0048598..embryonic.morphogenesis	1	1	NA
GO.0048599..oocyte.development	1	1	NA
GO.0060581..cell.fate.commitment.involved.in.pattern.specification	1	1	NA
GO.0070765..gamma.secretase.complex	1	1	NA
GO.0005768..endosome	1	1	NA
GO.0005769..early.endosome	1	1	NA
GO.0008201..heparin.binding	1	1	NA
GO.0031410..cytoplasmic.vesicle	0.540023	1	egl-21
GO.0042395..ecdysis..collagen.and.cuticulin.based.cuticle	1	1	NA
GO.0046914..transition.metal.ion.binding	1	1	NA
GO.0009306..protein.secretion	1	1	NA
GO.0016192..vesicle.mediated.transport	0.648683	1	efa-6
GO.0030131..clathrin.adaptor.complex	1	1	NA
GO.0003906..DNA..apurinic.or.apyrimidinic.site..lyase.activity	1	1	NA
GO.0006284..base.excision.repair	1	1	NA
GO.0006974..cellular.response.to.DNA.damage.stimulus	0.505099	1	xnp-1, sin-3
GO.0008311..double.stranded.DNA.3.5.exodeoxyribonuclease.activity	1	1	NA
GO.0017005..3.tyrosyl.DNA.phosphodiesterase.activity	1	1	NA
GO.0090305..nucleic.acid.phosphodiester.bond.hydrolysis	1	1	NA
GO.0004177..aminopeptidase.activity	1	1	NA
GO.0001714..endodermal.cell.fate.specification	1	1	NA
GO.0005881..cytoplasmic.microtubule	1	1	NA
GO.0005912..adherens.junction	0.235466	1	srgp-1
GO.0007026..negative.regulation.of.microtubule.depolymerization	1	1	NA
GO.0007389..pattern.specification.process	1	1	NA
GO.0007492..endoderm.development	1	1	NA
GO.0008013..beta.catenin.binding	1	1	NA
GO.0008283..cell.proliferation	1	1	NA
GO.0016055..Wnt.signaling.pathway	0.457768	1	csnk-1
GO.0016476..regulation.of.embryonic.cell.shape	1	1	NA
GO.0016477..cell.migration	0.114511	1	gex-3, ash-2, epg-4, Y39E4B.6
GO.0030177..positive.regulation.of.Wnt.signaling.pathway	1	1	NA
GO.0030178..negative.regulation.of.Wnt.signaling.pathway	0.0855734	1	eel-1
GO.0030334..regulation.of.cell.migration	0.206325	1	spat-3, hst-2
GO.0030877..beta.catenin.destruction.complex	1	1	NA
GO.0035414..negative.regulation.of.catenin.import.into.nucleus	1	1	NA
GO.0045295..gamma.catenin.binding	1	1	NA
GO.0045595..regulation.of.cell.differentiation	0.0991094	1	mdl-1
GO.0045732..positive.regulation.of.protein.catabolic.process	1	1	NA
GO.0047485..protein.N.terminus.binding	1	1	NA
GO.0048666..neuron.development	1	1	NA
GO.0051782..negative.regulation.of.cell.division	1	1	NA
GO.0090090..negative.regulation.of.canonical.Wnt.signaling.pathway	1	1	NA
GO.0008565..protein.transporter.activity	1	1	NA
GO.0030276..clathrin.binding	1	1	NA
GO.0005794..Golgi.apparatus	0.107252	1	aman-2, hst-2, sms-1, tpst-1
GO.0030117..membrane.coat	1	1	NA
GO.0030121..AP.1.adaptor.complex	0.071835	1	soap-1
GO.0030119..AP.type.membrane.coat.adaptor.complex	1	1	NA
GO.0008022..protein.C.terminus.binding	0.151288	1	dlk-1
GO.0008104..protein.localization	0.397963	1	unc-116
GO.0030139..endocytic.vesicle	1	1	NA
GO.0032794..GTPase.activating.protein.binding	1	1	NA
GO.0036062..presynaptic.periactive.zone	1	1	NA
GO.0045334..clathrin.coated.endocytic.vesicle	1	1	NA
GO.0007040..lysosome.organization	1	1	NA
GO.0030123..AP.3.adaptor.complex	1	1	NA
GO.0007154..cell.communication	1	1	NA
GO.0008595..anterior.posterior.axis.specification..embryo	1	1	NA
GO.0009880..embryonic.pattern.specification	1	1	NA
GO.0016331..morphogenesis.of.embryonic.epithelium	1	1	NA
GO.0040028..regulation.of.vulval.development	1	1	NA
GO.0046331..lateral.inhibition	1	1	NA
GO.0006833..water.transport	1	1	NA
GO.0015204..urea.transmembrane.transporter.activity	1	1	NA
GO.0015250..water.channel.activity	1	1	NA
GO.0015254..glycerol.channel.activity	1	1	NA
GO.0015793..glycerol.transport	1	1	NA
GO.0016323..basolateral.plasma.membrane	1	1	NA
GO.0022838..substrate.specific.channel.activity	1	1	NA
GO.0071918..urea.transmembrane.transport	1	1	NA
GO.0016324..apical.plasma.membrane	0.553584	1	wts-1
GO.0008150..biological_process	1	1	NA
GO.0016567..protein.ubiquitination	1	1	NA
GO.0005783..endoplasmic.reticulum	0.309952	1	enpl-1, emb-8, epg-4, aldo-1
GO.0007005..mitochondrion.organization	1	1	NA
GO.0007276..gamete.generation	0.432054	1	folt-1, lin-41
GO.0048259..regulation.of.receptor.mediated.endocytosis	1	1	NA
GO.1904748..regulation.of.apoptotic.process.involved.in.development	1	1	NA
GO.0032940..secretion.by.cell	0.653908	1	npp-8
GO.0012505..endomembrane.system	1	1	NA
GO.0042059..negative.regulation.of.epidermal.growth.factor.receptor.signaling.pathway	1	1	NA
GO.0000226..microtubule.cytoskeleton.organization	1	1	NA
GO.0005764..lysosome	0.579525	1	nuc-1
GO.0008088..axo.dendritic.transport	1	1	NA
GO.0008333..endosome.to.lysosome.transport	1	1	NA
GO.0048786..presynaptic.active.zone	1	1	NA
GO.0005930..axoneme	1	1	NA
GO.0046907..intracellular.transport	1	1	NA
GO.0032501..multicellular.organismal.process	1	1	NA
GO.0040010..positive.regulation.of.growth.rate	1	1	NA
GO.0050896..response.to.stimulus	1	1	NA
GO.0000049..tRNA.binding	1	1	NA
GO.0004812..aminoacyl.tRNA.ligase.activity	1	1	NA
GO.0004813..alanine.tRNA.ligase.activity	1	1	NA
GO.0006400..tRNA.modification	1	1	NA
GO.0006412..translation	0.974114	1	R07E3.4
GO.0006419..alanyl.tRNA.aminoacylation	1	1	NA
GO.0016597..amino.acid.binding	1	1	NA
GO.0016876..ligase.activity..forming.aminoacyl.tRNA.and.related.compounds	1	1	NA
GO.0043039..tRNA.aminoacylation	1	1	NA
GO.0005789..endoplasmic.reticulum.membrane	0.476599	1	rom-4, emb-8
GO.0006631..fatty.acid.metabolic.process	1	1	NA
GO.0006633..fatty.acid.biosynthetic.process	1	1	NA
GO.0016627..oxidoreductase.activity..acting.on.the.CH.CH.group.of.donors	0.360887	1	dhcr-7
GO.0005885..Arp2.3.protein.complex	1	1	NA
GO.0007015..actin.filament.organization	0.246793	1	gex-3
GO.0010631..epithelial.cell.migration	1	1	NA
GO.0031252..cell.leading.edge	1	1	NA
GO.0034314..Arp2.3.complex.mediated.actin.nucleation	1	1	NA
GO.0009790..embryo.development	1	1	NA
GO.0015629..actin.cytoskeleton	1	1	NA
GO.0030833..regulation.of.actin.filament.polymerization	1	1	NA
GO.0000176..nuclear.exosome..RNase.complex.	1	1	NA
GO.0000177..cytoplasmic.exosome..RNase.complex.	1	1	NA
GO.0004527..exonuclease.activity	1	1	NA
GO.0005730..nucleolus	1	1	NA
GO.0016075..rRNA.catabolic.process	1	1	NA
GO.0031125..rRNA.3.end.processing	1	1	NA
GO.0034427..nuclear.transcribed.mRNA.catabolic.process..exonucleolytic..3.5	1	1	NA
GO.0034475..U4.snRNA.3.end.processing	1	1	NA
GO.0071028..nuclear.mRNA.surveillance	1	1	NA
GO.0071051..polyadenylation.dependent.snoRNA.3.end.processing	1	1	NA
GO.0030041..actin.filament.polymerization	1	1	NA
GO.0000276..mitochondrial.proton.transporting.ATP.synthase.complex..coupling.factor.F.o.	1	1	NA
GO.0015078..hydrogen.ion.transmembrane.transporter.activity	1	1	NA
GO.0015986..ATP.synthesis.coupled.proton.transport	1	1	NA
GO.0034606..response.to.hermaphrodite.contact	1	1	NA
GO.0046933..proton.transporting.ATP.synthase.activity..rotational.mechanism	1	1	NA
GO.0003713..transcription.coactivator.activity	0.331596	1	taf-11.2
GO.0045893..positive.regulation.of.transcription..DNA.templated	1	1	NA
GO.0006754..ATP.biosynthetic.process	1	1	NA
GO.0015992..proton.transport	1	1	NA
GO.0031966..mitochondrial.membrane	1	1	NA
GO.0045263..proton.transporting.ATP.synthase.complex..coupling.factor.F.o.	1	1	NA
GO.0004767..sphingomyelin.phosphodiesterase.activity	1	1	NA
GO.0006665..sphingolipid.metabolic.process	0.3889	1	sms-1
GO.0006685..sphingomyelin.catabolic.process	1	1	NA
GO.0016798..hydrolase.activity..acting.on.glycosyl.bonds	0.118021	1	aman-2, tre-2
GO.0046513..ceramide.biosynthetic.process	1	1	NA
GO.0004190..aspartic.type.endopeptidase.activity	1	1	NA
GO.0098591..external.side.of.apical.plasma.membrane	1	1	NA
GO.0070265..necrotic.cell.death	1	1	NA
GO.0001012..RNA.polymerase.II.regulatory.region.DNA.binding	1	1	NA
GO.0001078..transcriptional.repressor.activity..RNA.polymerase.II.core.promoter.proximal.region.sequence.specific.binding	1	1	NA
GO.0007623..circadian.rhythm	1	1	NA
GO.0000981..RNA.polymerase.II.transcription.factor.activity..sequence.specific.DNA.binding	0.518908	1	atfs-1
GO.0006357..regulation.of.transcription.from.RNA.polymerase.II.promoter	0.457057	1	atfs-1, tlk-1
GO.0031929..TOR.signaling	1	1	NA
GO.0035966..response.to.topologically.incorrect.protein	1	1	NA
GO.0045089..positive.regulation.of.innate.immune.response	1	1	NA
GO.0045824..negative.regulation.of.innate.immune.response	1	1	NA
GO.0051019..mitogen.activated.protein.kinase.binding	1	1	NA
GO.0000785..chromatin	0.212302	1	zfp-1
GO.0005743..mitochondrial.inner.membrane	0.747392	1	R07E3.4
GO.0005929..cilium	1	1	NA
GO.0007617..mating.behavior	1	1	NA
GO.0015991..ATP.hydrolysis.coupled.proton.transport	1	1	NA
GO.0016820..hydrolase.activity..acting.on.acid.anhydrides..catalyzing.transmembrane.movement.of.substances	1	1	NA
GO.0019904..protein.domain.specific.binding	1	1	NA
GO.0033178..proton.transporting.two.sector.ATPase.complex..catalytic.domain	1	1	NA
GO.0043050..pharyngeal.pumping	0.351268	1	unc-26
GO.0045261..proton.transporting.ATP.synthase.complex..catalytic.core.F.1.	1	1	NA
GO.0046034..ATP.metabolic.process	1	1	NA
GO.0042776..mitochondrial.ATP.synthesis.coupled.proton.transport	1	1	NA
GO.0010494..cytoplasmic.stress.granule	1	1	NA
GO.0010603..regulation.of.cytoplasmic.mRNA.processing.body.assembly	1	1	NA
GO.0034063..stress.granule.assembly	1	1	NA
GO.0040022..feminization.of.hermaphroditic.germ.line	0.424358	1	epg-4
GO.0044822..poly.A..RNA.binding	1	1	NA
GO.0051729..germline.cell.cycle.switching..mitotic.to.meiotic.cell.cycle	0.122918	1	folt-1, aak-2
GO.0006821..chloride.transport	0.518908	1	kcc-2
GO.0008068..extracellular.glutamate.gated.chloride.channel.activity	1	1	NA
GO.0008144..drug.binding	1	1	NA
GO.0031987..locomotion.involved.in.locomotory.behavior	1	1	NA
GO.0042493..response.to.drug	1	1	NA
GO.0043051..regulation.of.pharyngeal.pumping	0.406892	1	egl-30
GO.1902476..chloride.transmembrane.transport	0.597991	1	kcc-2
GO.0001508..action.potential	1	1	NA
GO.0000779..condensed.chromosome..centromeric.region	1	1	NA
GO.0003690..double.stranded.DNA.binding	1	1	NA
GO.0005654..nucleoplasm	1	1	NA
GO.0006997..nucleus.organization	0.341505	1	npp-8
GO.0010165..response.to.X.ray	1	1	NA
GO.0051276..chromosome.organization	1	1	NA
GO.0006457..protein.folding	0.710881	1	enpl-1
GO.0016049..cell.growth	1	1	NA
GO.0002009..morphogenesis.of.an.epithelium	0.235466	1	xnp-1
GO.0007155..cell.adhesion	1	1	NA
GO.0007265..Ras.protein.signal.transduction	1	1	NA
GO.0016342..catenin.complex	1	1	NA
GO.0019903..protein.phosphatase.binding	1	1	NA
GO.0034333..adherens.junction.assembly	1	1	NA
GO.0034599..cellular.response.to.oxidative.stress	1	1	NA
GO.0042659..regulation.of.cell.fate.specification	1	1	NA
GO.0045294..alpha.catenin.binding	1	1	NA
GO.0045296..cadherin.binding	1	1	NA
GO.0048513..animal.organ.development	1	1	NA
GO.0006520..cellular.amino.acid.metabolic.process	1	1	NA
GO.0007606..sensory.perception.of.chemical.stimulus	1	1	NA
GO.0016831..carboxy.lyase.activity	1	1	NA
GO.0030170..pyridoxal.phosphate.binding	1	1	NA
GO.0034607..turning.behavior.involved.in.mating	0.112446	1	sax-2
GO.0036468..L.dopa.decarboxylase.activity	1	1	NA
GO.0042416..dopamine.biosynthetic.process	1	1	NA
GO.0042427..serotonin.biosynthetic.process	1	1	NA
GO.0004497..monooxygenase.activity	1	1	NA
GO.0004505..phenylalanine.4.monooxygenase.activity	1	1	NA
GO.0004510..tryptophan.5.monooxygenase.activity	1	1	NA
GO.0005506..iron.ion.binding	0.769145	1	emb-8
GO.0006559..L.phenylalanine.catabolic.process	1	1	NA
GO.0006569..tryptophan.catabolic.process	1	1	NA
GO.0006571..tyrosine.biosynthetic.process	1	1	NA
GO.0009072..aromatic.amino.acid.family.metabolic.process	1	1	NA
GO.0016714..oxidoreductase.activity..acting.on.paired.donors..with.incorporation.or.reduction.of.molecular.oxygen..reduced.pteridine.as.one.donor..and.incorporation.of.one.atom.of.oxygen	1	1	NA
GO.0042438..melanin.biosynthetic.process	1	1	NA
GO.0005113..patched.binding	1	1	NA
GO.0005119..smoothened.binding	1	1	NA
GO.0030030..cell.projection.organization	1	1	NA
GO.0034464..BBSome	1	1	NA
GO.0035058..nonmotile.primary.cilium.assembly	1	1	NA
GO.0035721..intraciliary.retrograde.transport	1	1	NA
GO.0036064..ciliary.basal.body	1	1	NA
GO.0061512..protein.localization.to.cilium	1	1	NA
GO.0031514..motile.cilium	1	1	NA
GO.1903441..protein.localization.to.ciliary.membrane	1	1	NA
GO.0005198..structural.molecule.activity	0.457768	1	jph-1
GO.0006890..retrograde.vesicle.mediated.transport..Golgi.to.ER	1	1	NA
GO.0008355..olfactory.learning	1	1	NA
GO.0042073..intraciliary.transport	1	1	NA
GO.0042384..cilium.assembly	1	1	NA
GO.0097546..ciliary.base	1	1	NA
GO.1904107..protein.localization.to.microvillus.membrane	1	1	NA
GO.0004089..carbonate.dehydratase.activity	1	1	NA
GO.0000045..autophagosome.assembly	1	1	NA
GO.0000407..pre.autophagosomal.structure	1	1	NA
GO.0006914..autophagy	0.41569	1	epg-4
GO.0009267..cellular.response.to.starvation	1	1	NA
GO.0012501..programmed.cell.death	1	1	NA
GO.0016023..cytoplasmic..membrane.bounded.vesicle	1	1	NA
GO.0032258..CVT.pathway	1	1	NA
GO.0034271..phosphatidylinositol.3.kinase.complex..class.III..type.I	1	1	NA
GO.0034272..phosphatidylinositol.3.kinase.complex..class.III..type.II	1	1	NA
GO.0043277..apoptotic.cell.clearance	1	1	NA
GO.0044804..nucleophagy	1	1	NA
GO.0045324..late.endosome.to.vacuole.transport	1	1	NA
GO.0005874..microtubule	0.255516	1	unc-116, klp-7
GO.0007017..microtubule.based.process	1	1	NA
GO.0007635..chemosensory.behavior	1	1	NA
GO.0004869..cysteine.type.endopeptidase.inhibitor.activity	1	1	NA
GO.0009966..regulation.of.signal.transduction	1	1	NA
GO.0016573..histone.acetylation	0.212302	1	pcaf-1
GO.1990001..inhibition.of.cysteine.type.endopeptidase.activity.involved.in.apoptotic.process	1	1	NA
GO.0005581..collagen.trimer	1	1	NA
GO.0042302..structural.constituent.of.cuticle	1	1	NA
GO.0042329..structural.constituent.of.collagen.and.cuticulin.based.cuticle	1	1	NA
GO.0060109..medial.layer.of.collagen.and.cuticulin.based.cuticle.extracellular.matrix	1	1	NA
GO.0030312..external.encapsulating.structure	1	1	NA
GO.0004601..peroxidase.activity	1	1	NA
GO.0016174..NAD.P.H.oxidase.activity	1	1	NA
GO.0018149..peptide.cross.linking	1	1	NA
GO.0020037..heme.binding	1	1	NA
GO.0040032..post.embryonic.body.morphogenesis	1	1	NA
GO.0042338..cuticle.development.involved.in.collagen.and.cuticulin.based.cuticle.molting.cycle	0.0991094	1	tpst-1
GO.0042744..hydrogen.peroxide.catabolic.process	1	1	NA
GO.0098869..cellular.oxidant.detoxification	1	1	NA
GO.0008236..serine.type.peptidase.activity	1	1	NA
GO.0004867..serine.type.endopeptidase.inhibitor.activity	1	1	NA
GO.0010951..negative.regulation.of.endopeptidase.activity	1	1	NA
GO.0044254..multicellular.organismal.protein.catabolic.process	1	1	NA
GO.0000922..spindle.pole	1	1	NA
GO.0003777..microtubule.motor.activity	0.0640549	1	unc-116, klp-7
GO.0007018..microtubule.based.movement	0.0600485	1	unc-116, klp-7
GO.0008017..microtubule.binding	0.0989731	1	unc-116, klp-7
GO.0008574..ATP.dependent.microtubule.motor.activity..plus.end.directed	0.0991094	1	unc-116
GO.1902845..negative.regulation.of.mitotic.spindle.elongation	1	1	NA
GO.0004077..biotin..acetyl.CoA.carboxylase..ligase.activity	1	1	NA
GO.0003712..transcription.cofactor.activity	0.151288	1	bra-1
GO.0000724..double.strand.break.repair.via.homologous.recombination	1	1	NA
GO.0006289..nucleotide.excision.repair	1	1	NA
GO.0031436..BRCA1.BARD1.complex	1	1	NA
GO.0035066..positive.regulation.of.histone.acetylation	1	1	NA
GO.0035067..negative.regulation.of.histone.acetylation	1	1	NA
GO.0045717..negative.regulation.of.fatty.acid.biosynthetic.process	1	1	NA
GO.0051307..meiotic.chromosome.separation	1	1	NA
GO.0070531..BRCA1.A.complex	1	1	NA
GO.0071158..positive.regulation.of.cell.cycle.arrest	1	1	NA
GO.0008446..GDP.mannose.4.6.dehydratase.activity	1	1	NA
GO.0017085..response.to.insecticide	1	1	NA
GO.0019673..GDP.mannose.metabolic.process	1	1	NA
GO.0042350..GDP.L.fucose.biosynthetic.process	1	1	NA
GO.0042351..de.novo.GDP.L.fucose.biosynthetic.process	1	1	NA
GO.0075015..formation.of.infection.structure.on.or.near.host	1	1	NA
GO.0006486..protein.glycosylation	0.573184	1	ogt-1
GO.0008376..acetylgalactosaminyltransferase.activity	1	1	NA
GO.0008378..galactosyltransferase.activity	1	1	NA
GO.0016757..transferase.activity..transferring.glycosyl.groups	0.447131	1	tps-2, ogt-1
GO.0006688..glycosphingolipid.biosynthetic.process	1	1	NA
GO.0019187..beta.1.4.mannosyltransferase.activity	1	1	NA
GO.0097502..mannosylation	1	1	NA
GO.0009636..response.to.toxic.substance	1	1	NA
GO.0033207..beta.1.4.N.acetylgalactosaminyltransferase.activity	1	1	NA
GO.0045747..positive.regulation.of.Notch.signaling.pathway	1	1	NA
GO.0016051..carbohydrate.biosynthetic.process	1	1	NA
GO.0000126..transcription.factor.TFIIIB.complex	1	1	NA
GO.0006352..DNA.templated.transcription..initiation	1	1	NA
GO.0006384..transcription.initiation.from.RNA.polymerase.III.promoter	1	1	NA
GO.0017025..TBP.class.protein.binding	1	1	NA
GO.0019827..stem.cell.population.maintenance	1	1	NA
GO.1903506..regulation.of.nucleic.acid.templated.transcription	0.0855734	1	taf-11.2
GO.0000775..chromosome..centromeric.region	1	1	NA
GO.0000776..kinetochore	0.351268	1	klp-7
GO.0000777..condensed.chromosome.kinetochore	0.212302	1	klp-7
GO.0007094..mitotic.spindle.assembly.checkpoint	1	1	NA
GO.0044281..small.molecule.metabolic.process	1	1	NA
GO.0005509..calcium.ion.binding	0.387239	1	efhd-1, T25G3.4, efk-1
GO.0004714..transmembrane.receptor.protein.tyrosine.kinase.activity	1	1	NA
GO.0005109..frizzled.binding	1	1	NA
GO.0017147..Wnt.protein.binding	1	1	NA
GO.0018108..peptidyl.tyrosine.phosphorylation	1	1	NA
GO.0031594..neuromuscular.junction	1	1	NA
GO.0032809..neuronal.cell.body.membrane	0.163856	1	sax-7
GO.0045200..establishment.of.neuroblast.polarity	1	1	NA
GO.0005869..dynactin.complex	1	1	NA
GO.0008290..F.actin.capping.protein.complex	1	1	NA
GO.0051693..actin.filament.capping	1	1	NA
GO.0000578..embryonic.axis.specification	1	1	NA
GO.0000902..cell.morphogenesis	0.151288	1	sax-2
GO.0010591..regulation.of.lamellipodium.assembly	1	1	NA
GO.0051490..negative.regulation.of.filopodium.assembly	1	1	NA
GO.0007631..feeding.behavior	0.163856	1	egl-30
GO.0008504..monoamine.transmembrane.transporter.activity	1	1	NA
GO.0015844..monoamine.transport	1	1	NA
GO.0004511..tyrosine.3.monooxygenase.activity	1	1	NA
GO.0007638..mechanosensory.behavior	1	1	NA
GO.0032094..response.to.food	1	1	NA
GO.0042136..neurotransmitter.biosynthetic.process	1	1	NA
GO.0042417..dopamine.metabolic.process	1	1	NA
GO.0042423..catecholamine.biosynthetic.process	1	1	NA
GO.0003934..GTP.cyclohydrolase.I.activity	1	1	NA
GO.0006729..tetrahydrobiopterin.biosynthetic.process	1	1	NA
GO.0035998..7.8.dihydroneopterin.3.triphosphate.biosynthetic.process	1	1	NA
GO.0046654..tetrahydrofolate.biosynthetic.process	1	1	NA
GO.0005901..caveola	1	1	NA
GO.0009898..cytoplasmic.side.of.plasma.membrane	1	1	NA
GO.0030133..transport.vesicle	1	1	NA
GO.0048471..perinuclear.region.of.cytoplasm	0.255516	1	mut-15, ogt-1
GO.0060473..cortical.granule	1	1	NA
GO.0070836..caveola.assembly	1	1	NA
GO.0005319..lipid.transporter.activity	1	1	NA
GO.0007166..cell.surface.receptor.signaling.pathway	1	1	NA
GO.0007567..parturition	0.071835	1	ras-1
GO.0004402..histone.acetyltransferase.activity	0.188438	1	pcaf-1
GO.0004468..lysine.N.acetyltransferase.activity..acting.on.acetyl.phosphate.as.donor	1	1	NA
GO.0010975..regulation.of.neuron.projection.development	1	1	NA
GO.0016746..transferase.activity..transferring.acyl.groups	0.747392	1	acl-1
GO.0018393..internal.peptidyl.lysine.acetylation	1	1	NA
GO.0061629..RNA.polymerase.II.sequence.specific.DNA.binding.transcription.factor.binding	1	1	NA
GO.0005244..voltage.gated.ion.channel.activity	1	1	NA
GO.0005245..voltage.gated.calcium.channel.activity	1	1	NA
GO.0005261..cation.channel.activity	1	1	NA
GO.0005262..calcium.channel.activity	1	1	NA
GO.0005891..voltage.gated.calcium.channel.complex	1	1	NA
GO.0006816..calcium.ion.transport	1	1	NA
GO.0008332..low.voltage.gated.calcium.channel.activity	1	1	NA
GO.0034765..regulation.of.ion.transmembrane.transport	1	1	NA
GO.0045760..positive.regulation.of.action.potential	1	1	NA
GO.0051899..membrane.depolarization	1	1	NA
GO.0070588..calcium.ion.transmembrane.transport	1	1	NA
GO.0086010..membrane.depolarization.during.action.potential	1	1	NA
GO.0007528..neuromuscular.junction.development	1	1	NA
GO.0008331..high.voltage.gated.calcium.channel.activity	1	1	NA
GO.0051924..regulation.of.calcium.ion.transport	1	1	NA
GO.0061199..striated.muscle.contraction.involved.in.embryonic.body.morphogenesis	1	1	NA
GO.1901385..regulation.of.voltage.gated.calcium.channel.activity	1	1	NA
GO.0004518..nuclease.activity	1	1	NA
GO.0004535..poly.A..specific.ribonuclease.activity	1	1	NA
GO.0006417..regulation.of.translation	1	1	NA
GO.0017148..negative.regulation.of.translation	1	1	NA
GO.0030014..CCR4.NOT.complex	1	1	NA
GO.0030015..CCR4.NOT.core.complex	1	1	NA
GO.0031047..gene.silencing.by.RNA	1	1	NA
GO.0043186..P.granule	1	1	NA
GO.0043928..exonucleolytic.nuclear.transcribed.mRNA.catabolic.process.involved.in.deadenylation.dependent.decay	1	1	NA
GO.0090503..RNA.phosphodiester.bond.hydrolysis..exonucleolytic	1	1	NA
GO.0004129..cytochrome.c.oxidase.activity	1	1	NA
GO.0005740..mitochondrial.envelope	1	1	NA
GO.0016705..oxidoreductase.activity..acting.on.paired.donors..with.incorporation.or.reduction.of.molecular.oxygen	1	1	NA
GO.0010332..response.to.gamma.radiation	1	1	NA
GO.0005832..chaperonin.containing.T.complex	1	1	NA
GO.0051082..unfolded.protein.binding	0.3889	1	enpl-1
GO.0006270..DNA.replication.initiation	1	1	NA
GO.0004721..phosphoprotein.phosphatase.activity	0.288484	1	Y41D4A.5, scpl-1
GO.0004722..protein.serine.threonine.phosphatase.activity	0.200459	1	ogt-1
GO.0004725..protein.tyrosine.phosphatase.activity	0.222638	1	Y41D4A.5, mtm-3
GO.0006470..protein.dephosphorylation	0.0911711	1	Y41D4A.5, cel-1, scpl-1, ogt-1
GO.0007096..regulation.of.exit.from.mitosis	1	1	NA
GO.0008138..protein.tyrosine.serine.threonine.phosphatase.activity	0.212302	1	cel-1
GO.0016791..phosphatase.activity	0.125586	1	scpl-1
GO.0035335..peptidyl.tyrosine.dephosphorylation	0.0851555	1	Y41D4A.5, cel-1, mtm-3
GO.0040038..polar.body.extrusion.after.meiotic.divisions	0.188438	1	unc-116
GO.0045786..negative.regulation.of.cell.cycle	1	1	NA
GO.0060284..regulation.of.cell.development	1	1	NA
GO.0071850..mitotic.cell.cycle.arrest	1	1	NA
GO.1990023..mitotic.spindle.midzone	1	1	NA
GO.0000087..mitotic.M.phase	1	1	NA
GO.0000212..meiotic.spindle.organization	1	1	NA
GO.0000132..establishment.of.mitotic.spindle.orientation	0.360887	1	sax-7
GO.0007163..establishment.or.maintenance.of.cell.polarity	1	1	NA
GO.0032970..regulation.of.actin.filament.based.process	1	1	NA
GO.0040001..establishment.of.mitotic.spindle.localization	1	1	NA
GO.0055037..recycling.endosome	1	1	NA
GO.0004126..cytidine.deaminase.activity	1	1	NA
GO.0006217..deoxycytidine.catabolic.process	1	1	NA
GO.0009451..RNA.modification	1	1	NA
GO.0009972..cytidine.deamination	1	1	NA
GO.0016070..RNA.metabolic.process	1	1	NA
GO.0047844..deoxycytidine.deaminase.activity	1	1	NA
GO.0005385..zinc.ion.transmembrane.transporter.activity	1	1	NA
GO.0006812..cation.transport	1	1	NA
GO.0006829..zinc.II.ion.transport	1	1	NA
GO.0008324..cation.transmembrane.transporter.activity	1	1	NA
GO.0010043..response.to.zinc.ion	1	1	NA
GO.0046579..positive.regulation.of.Ras.protein.signal.transduction	1	1	NA
GO.0061088..regulation.of.sequestering.of.zinc.ion	1	1	NA
GO.0071294..cellular.response.to.zinc.ion	1	1	NA
GO.0071577..zinc.II.ion.transmembrane.transport	1	1	NA
GO.0007156..homophilic.cell.adhesion.via.plasma.membrane.adhesion.molecules	1	1	NA
GO.0097402..neuroblast.migration	1	1	NA
GO.0008306..associative.learning	1	1	NA
GO.0001556..oocyte.maturation	1	1	NA
GO.0005815..microtubule.organizing.center	1	1	NA
GO.0008353..RNA.polymerase.II.carboxy.terminal.domain.kinase.activity	0.0991094	1	cdk-7
GO.0032436..positive.regulation.of.proteasomal.ubiquitin.dependent.protein.catabolic.process	1	1	NA
GO.0045836..positive.regulation.of.meiotic.nuclear.division	1	1	NA
GO.0051446..positive.regulation.of.meiotic.cell.cycle	1	1	NA
GO.0071902..positive.regulation.of.protein.serine.threonine.kinase.activity	1	1	NA
GO.0007530..sex.determination	1	1	NA
GO.0008584..male.gonad.development	1	1	NA
GO.0009791..post.embryonic.development	1	1	NA
GO.0032877..positive.regulation.of.DNA.endoreduplication	1	1	NA
GO.0044843..cell.cycle.G1.S.phase.transition	1	1	NA
GO.1900087..positive.regulation.of.G1.S.transition.of.mitotic.cell.cycle	1	1	NA
GO.0032880..regulation.of.protein.localization	0.0600485	1	unc-14, cdk-5
GO.0003729..mRNA.binding	1	1	NA
GO.0003730..mRNA.3.UTR.binding	1	1	NA
GO.0007076..mitotic.chromosome.condensation	1	1	NA
GO.1990170..stress.response.to.cadmium.ion	1	1	NA
GO.0006260..DNA.replication	1	1	NA
GO.0001845..phagolysosome.assembly	1	1	NA
GO.0001891..phagocytic.cup	1	1	NA
GO.0005044..scavenger.receptor.activity	1	1	NA
GO.0030670..phagocytic.vesicle.membrane	1	1	NA
GO.0031260..pseudopodium.membrane	1	1	NA
GO.0031532..actin.cytoskeleton.reorganization	1	1	NA
GO.0034620..cellular.response.to.unfolded.protein	1	1	NA
GO.0043654..recognition.of.apoptotic.cell	1	1	NA
GO.0005070..SH3.SH2.adaptor.activity	1	1	NA
GO.0006909..phagocytosis	1	1	NA
GO.0009967..positive.regulation.of.signal.transduction	1	1	NA
GO.0032403..protein.complex.binding	1	1	NA
GO.0004175..endopeptidase.activity	1	1	NA
GO.0004197..cysteine.type.endopeptidase.activity	1	1	NA
GO.0008234..cysteine.type.peptidase.activity	1	1	NA
GO.0016540..protein.autoprocessing	1	1	NA
GO.0030155..regulation.of.cell.adhesion	1	1	NA
GO.0042981..regulation.of.apoptotic.process	0.122918	1	tig-2, max-2
GO.0097194..execution.phase.of.apoptosis	1	1	NA
GO.0097200..cysteine.type.endopeptidase.activity.involved.in.execution.phase.of.apoptosis	1	1	NA
GO.1902742..apoptotic.process.involved.in.development	1	1	NA
GO.0008635..activation.of.cysteine.type.endopeptidase.activity.involved.in.apoptotic.process.by.cytochrome.c	1	1	NA
GO.0008656..cysteine.type.endopeptidase.activator.activity.involved.in.apoptotic.process	1	1	NA
GO.0010954..positive.regulation.of.protein.processing	1	1	NA
GO.0016505..peptidase.activator.activity.involved.in.apoptotic.process	1	1	NA
GO.0043281..regulation.of.cysteine.type.endopeptidase.activity.involved.in.apoptotic.process	1	1	NA
GO.0043531..ADP.binding	1	1	NA
GO.0051432..BH1.domain.binding	1	1	NA
GO.0051434..BH3.domain.binding	1	1	NA
GO.0061133..endopeptidase.activator.activity	1	1	NA
GO.2001056..positive.regulation.of.cysteine.type.endopeptidase.activity	1	1	NA
GO.0017124..SH3.domain.binding	1	1	NA
GO.0019899..enzyme.binding	1	1	NA
GO.0032045..guanyl.nucleotide.exchange.factor.complex	1	1	NA
GO.0005124..scavenger.receptor.binding	1	1	NA
GO.0045309..protein.phosphorylated.amino.acid.binding	1	1	NA
GO.0045335..phagocytic.vesicle	1	1	NA
GO.0070782..phosphatidylserine.exposure.on.apoptotic.cell.surface	1	1	NA
GO.0000422..mitophagy	1	1	NA
GO.0005741..mitochondrial.outer.membrane	0.257953	1	wdr-23
GO.0008630..intrinsic.apoptotic.signaling.pathway.in.response.to.DNA.damage	1	1	NA
GO.0010636..positive.regulation.of.mitochondrial.fusion	1	1	NA
GO.0031090..organelle.membrane	1	1	NA
GO.0043069..negative.regulation.of.programmed.cell.death	1	1	NA
GO.0046982..protein.heterodimerization.activity	0.228099	1	mdl-1, taf-11.2
GO.0097192..extrinsic.apoptotic.signaling.pathway.in.absence.of.ligand	1	1	NA
GO.2001243..negative.regulation.of.intrinsic.apoptotic.signaling.pathway	1	1	NA
GO.0001764..neuron.migration	0.351268	1	rin-1
GO.0008045..motor.neuron.axon.guidance	1	1	NA
GO.0010172..embryonic.body.morphogenesis	0.103649	1	gex-3, ddx-23
GO.0033563..dorsal.ventral.axon.guidance	0.246793	1	rin-1
GO.0048812..neuron.projection.morphogenesis	1	1	NA
GO.0048846..axon.extension.involved.in.axon.guidance	1	1	NA
GO.0050764..regulation.of.phagocytosis	1	1	NA
GO.0097628..distal.tip.cell.migration	1	1	NA
GO.0005547..phosphatidylinositol.3.4.5.trisphosphate.binding	1	1	NA
GO.0006911..phagocytosis..engulfment	1	1	NA
GO.0017048..Rho.GTPase.binding	1	1	NA
GO.0035262..gonad.morphogenesis	0.341505	1	max-2
GO.0060097..cytoskeletal.rearrangement.involved.in.phagocytosis..engulfment	1	1	NA
GO.0070064..proline.rich.region.binding	1	1	NA
GO.0070273..phosphatidylinositol.4.phosphate.binding	1	1	NA
GO.0080025..phosphatidylinositol.3.5.bisphosphate.binding	1	1	NA
GO.0051400..BH.domain.binding	1	1	NA
GO.0007588..excretion	1	1	NA
GO.0030104..water.homeostasis	1	1	NA
GO.0060290..transdifferentiation	0.138533	1	ash-2
GO.1904081..positive.regulation.of.transcription.from.RNA.polymerase.II.promoter.involved.in.neuron.differentiation	1	1	NA
GO.0021520..spinal.cord.motor.neuron.cell.fate.specification	1	1	NA
GO.0016337..single.organismal.cell.cell.adhesion	1	1	NA
GO.0016358..dendrite.development	0.0989731	1	hst-2, lin-59
GO.0016048..detection.of.temperature.stimulus	1	1	NA
GO.0030182..neuron.differentiation	1	1	NA
GO.0040040..thermosensory.behavior	1	1	NA
GO.0045026..plasma.membrane.fusion	1	1	NA
GO.0048859..formation.of.anatomical.boundary	1	1	NA
GO.0001228..transcriptional.activator.activity..RNA.polymerase.II.transcription.regulatory.region.sequence.specific.binding	1	1	NA
GO.0030516..regulation.of.axon.extension	1	1	NA
GO.0008354..germ.cell.migration	1	1	NA
GO.0008544..epidermis.development	1	1	NA
GO.0030728..ovulation	1	1	NA
GO.1900194..negative.regulation.of.oocyte.maturation	1	1	NA
GO.0007498..mesoderm.development	1	1	NA
GO.0007501..mesodermal.cell.fate.specification	1	1	NA
GO.0009786..regulation.of.asymmetric.cell.division	1	1	NA
GO.0009952..anterior.posterior.pattern.specification	1	1	NA
GO.0042692..muscle.cell.differentiation	1	1	NA
GO.0001077..transcriptional.activator.activity..RNA.polymerase.II.core.promoter.proximal.region.sequence.specific.binding	1	1	NA
GO.0043282..pharyngeal.muscle.development	1	1	NA
GO.0034243..regulation.of.transcription.elongation.from.RNA.polymerase.II.promoter	1	1	NA
GO.0055007..cardiac.muscle.cell.differentiation	1	1	NA
GO.0050807..regulation.of.synapse.organization	0.0991094	1	dlk-1
GO.0007548..sex.differentiation	1	1	NA
GO.0009888..tissue.development	1	1	NA
GO.0009886..post.embryonic.morphogenesis	1	1	NA
GO.0048665..neuron.fate.specification	1	1	NA
GO.0000723..telomere.maintenance	1	1	NA
GO.0000781..chromosome..telomeric.region	1	1	NA
GO.0000784..nuclear.chromosome..telomeric.region	1	1	NA
GO.0003691..double.stranded.telomeric.DNA.binding	1	1	NA
GO.0008301..DNA.binding..bending	1	1	NA
GO.0016233..telomere.capping	1	1	NA
GO.0032200..telomere.organization	1	1	NA
GO.0042048..olfactory.behavior	1	1	NA
GO.0042162..telomeric.DNA.binding	1	1	NA
GO.0007538..primary.sex.determination	1	1	NA
GO.0043073..germ.cell.nucleus	1	1	NA
GO.0006891..intra.Golgi.vesicle.mediated.transport	1	1	NA
GO.0030173..integral.component.of.Golgi.membrane	0.188438	1	sms-1
GO.0006030..chitin.metabolic.process	1	1	NA
GO.0008061..chitin.binding	1	1	NA
GO.0030703..eggshell.formation	0.125586	1	emb-8
GO.0006370..7.methylguanosine.mRNA.capping	0.071835	1	cel-1
GO.0001666..response.to.hypoxia	1	1	NA
GO.0043068..positive.regulation.of.programmed.cell.death	1	1	NA
GO.0030529..intracellular.ribonucleoprotein.complex	1	1	NA
GO.0043021..ribonucleoprotein.complex.binding	1	1	NA
GO.0035567..non.canonical.Wnt.signaling.pathway	1	1	NA
GO.0042813..Wnt.activated.receptor.activity	1	1	NA
GO.0060070..canonical.Wnt.signaling.pathway	1	1	NA
GO.0003724..RNA.helicase.activity	1	1	NA
GO.0004004..ATP.dependent.RNA.helicase.activity	0.137889	1	mel-46, ddx-23
GO.0004386..helicase.activity	0.121608	1	mel-46, xnp-1, ddx-23
GO.0010501..RNA.secondary.structure.unwinding	0.0898107	1	mel-46, ddx-23
GO.0016071..mRNA.metabolic.process	1	1	NA
GO.0033962..cytoplasmic.mRNA.processing.body.assembly	1	1	NA
GO.0043229..intracellular.organelle	1	1	NA
GO.0003746..translation.elongation.factor.activity	0.22397	1	ell-1
GO.0006414..translational.elongation	0.22397	1	ell-1
GO.0004102..choline.O.acetyltransferase.activity	1	1	NA
GO.0008292..acetylcholine.biosynthetic.process	1	1	NA
GO.0060076..excitatory.synapse	1	1	NA
GO.0000118..histone.deacetylase.complex	0.0991094	1	sin-3
GO.0001709..cell.fate.determination	1	1	NA
GO.0003678..DNA.helicase.activity	1	1	NA
GO.0006338..chromatin.remodeling	0.176239	1	let-526
GO.0016818..hydrolase.activity..acting.on.acid.anhydrides..in.phosphorus.containing.anhydrides	1	1	NA
GO.0032508..DNA.duplex.unwinding	1	1	NA
GO.0046580..negative.regulation.of.Ras.protein.signal.transduction	1	1	NA
GO.0030992..intraciliary.transport.particle.B	1	1	NA
GO.0003774..motor.activity	1	1	NA
GO.0030286..dynein.complex	1	1	NA
GO.0034608..vulval.location	1	1	NA
GO.0051959..dynein.light.intermediate.chain.binding	1	1	NA
GO.0060170..ciliary.membrane	1	1	NA
GO.0061066..positive.regulation.of.dauer.larval.development	0.138533	1	aak-2
GO.0005222..intracellular.cAMP.activated.cation.channel.activity	1	1	NA
GO.0005223..intracellular.cGMP.activated.cation.channel.activity	1	1	NA
GO.0005249..voltage.gated.potassium.channel.activity	1	1	NA
GO.0042391..regulation.of.membrane.potential	1	1	NA
GO.0071805..potassium.ion.transmembrane.transport	0.239048	1	twk-24, kcc-2
GO.0005921..gap.junction	1	1	NA
GO.0006972..hyperosmotic.response	1	1	NA
GO.0009408..response.to.heat	1	1	NA
GO.0030991..intraciliary.transport.particle.A	1	1	NA
GO.0035720..intraciliary.anterograde.transport	1	1	NA
GO.0035869..ciliary.transition.zone	1	1	NA
GO.0007224..smoothened.signaling.pathway	1	1	NA
GO.0004100..chitin.synthase.activity	1	1	NA
GO.0016758..transferase.activity..transferring.hexosyl.groups	1	1	NA
GO.0033314..mitotic.DNA.replication.checkpoint	1	1	NA
GO.0051574..positive.regulation.of.histone.H3.K9.methylation	1	1	NA
GO.0000209..protein.polyubiquitination	0.432898	1	C09E7.7
GO.0030544..Hsp70.protein.binding	1	1	NA
GO.0034450..ubiquitin.ubiquitin.ligase.activity	1	1	NA
GO.0051865..protein.autoubiquitination	1	1	NA
GO.0006814..sodium.ion.transport	1	1	NA
GO.0015220..choline.transmembrane.transporter.activity	1	1	NA
GO.0015293..symporter.activity	1	1	NA
GO.0015871..choline.transport	1	1	NA
GO.0000272..polysaccharide.catabolic.process	1	1	NA
GO.0004553..hydrolase.activity..hydrolyzing.O.glycosyl.compounds	0.424358	1	aman-2
GO.0004568..chitinase.activity	1	1	NA
GO.0006032..chitin.catabolic.process	1	1	NA
GO.0009620..response.to.fungus	1	1	NA
GO.0000307..cyclin.dependent.protein.kinase.holoenzyme.complex	1	1	NA
GO.0016538..cyclin.dependent.protein.serine.threonine.kinase.regulator.activity	1	1	NA
GO.0045737..positive.regulation.of.cyclin.dependent.protein.serine.threonine.kinase.activity	1	1	NA
GO.1901409..positive.regulation.of.phosphorylation.of.RNA.polymerase.II.C.terminal.domain	1	1	NA
GO.0004103..choline.kinase.activity	1	1	NA
GO.0006657..CDP.choline.pathway	1	1	NA
GO.0004305..ethanolamine.kinase.activity	1	1	NA
GO.0006646..phosphatidylethanolamine.biosynthetic.process	1	1	NA
GO.0006656..phosphatidylcholine.biosynthetic.process	1	1	NA
GO.0008654..phospholipid.biosynthetic.process	0.279781	1	acl-1
GO.0004860..protein.kinase.inhibitor.activity	1	1	NA
GO.0007050..cell.cycle.arrest	1	1	NA
GO.0032875..regulation.of.DNA.endoreduplication	1	1	NA
GO.0045596..negative.regulation.of.cell.differentiation	1	1	NA
GO.0045605..negative.regulation.of.epidermal.cell.differentiation	1	1	NA
GO.0051302..regulation.of.cell.division	1	1	NA
GO.1902806..regulation.of.cell.cycle.G1.S.phase.transition	1	1	NA
GO.1904030..negative.regulation.of.cyclin.dependent.protein.kinase.activity	1	1	NA
GO.2000134..negative.regulation.of.G1.S.transition.of.mitotic.cell.cycle	1	1	NA
GO.0019722..calcium.mediated.signaling	1	1	NA
GO.0032793..positive.regulation.of.CREB.transcription.factor.activity	1	1	NA
GO.0045860..positive.regulation.of.protein.kinase.activity	0.071835	1	tlk-1
GO.0004003..ATP.dependent.DNA.helicase.activity	1	1	NA
GO.0006303..double.strand.break.repair.via.nonhomologous.end.joining	1	1	NA
GO.0006310..DNA.recombination	1	1	NA
GO.0043564..Ku70.Ku80.complex	1	1	NA
GO.0071480..cellular.response.to.gamma.radiation	1	1	NA
GO.0071481..cellular.response.to.X.ray	1	1	NA
GO.0016817..hydrolase.activity..acting.on.acid.anhydrides	1	1	NA
GO.0005911..cell.cell.junction	1	1	NA
GO.0090136..epithelial.cell.cell.adhesion	1	1	NA
GO.0005604..basement.membrane	1	1	NA
GO.0031012..extracellular.matrix	1	1	NA
GO.0050808..synapse.organization	1	1	NA
GO.0005247..voltage.gated.chloride.channel.activity	1	1	NA
GO.1903959..regulation.of.anion.transmembrane.transport	1	1	NA
GO.0010466..negative.regulation.of.peptidase.activity	1	1	NA
GO.0030414..peptidase.inhibitor.activity	1	1	NA
GO.0000975..regulatory.region.DNA.binding	1	1	NA
GO.0001933..negative.regulation.of.protein.phosphorylation	1	1	NA
GO.0001934..positive.regulation.of.protein.phosphorylation	1	1	NA
GO.0006119..oxidative.phosphorylation	1	1	NA
GO.0006744..ubiquinone.biosynthetic.process	1	1	NA
GO.0010629..negative.regulation.of.gene.expression	1	1	NA
GO.0030534..adult.behavior	1	1	NA
GO.0045333..cellular.respiration	1	1	NA
GO.0048520..positive.regulation.of.behavior	1	1	NA
GO.0051094..positive.regulation.of.developmental.process	1	1	NA
GO.0061063..positive.regulation.of.nematode.larval.development	0.112446	1	atfs-1
GO.1904808..positive.regulation.of.protein.oxidation	1	1	NA
GO.2000377..regulation.of.reactive.oxygen.species.metabolic.process	1	1	NA
GO.0009411..response.to.UV	1	1	NA
GO.0005765..lysosomal.membrane	1	1	NA
GO.0007034..vacuolar.transport	1	1	NA
GO.0015809..arginine.transport	1	1	NA
GO.0031301..integral.component.of.organelle.membrane	1	1	NA
GO.0051453..regulation.of.intracellular.pH	1	1	NA
GO.0004198..calcium.dependent.cysteine.type.endopeptidase.activity	1	1	NA
GO.0031430..M.band	0.331596	1	scpl-1
GO.0005001..transmembrane.receptor.protein.tyrosine.phosphatase.activity	1	1	NA
GO.0040037..negative.regulation.of.fibroblast.growth.factor.receptor.signaling.pathway	1	1	NA
GO.0016482..cytosolic.transport	1	1	NA
GO.0031134..sister.chromatid.biorientation	1	1	NA
GO.0051306..mitotic.sister.chromatid.separation	1	1	NA
GO.0072686..mitotic.spindle	1	1	NA
GO.0031965..nuclear.membrane	1	1	NA
GO.0051296..establishment.of.meiotic.spindle.orientation	0.071835	1	unc-116
GO.0071944..cell.periphery	0.112446	1	rin-1
GO.0045664..regulation.of.neuron.differentiation	1	1	NA
GO.0010754..negative.regulation.of.cGMP.mediated.signaling	1	1	NA
GO.0070482..response.to.oxygen.levels	0.138533	1	egl-4
GO.0048609..multicellular.organismal.reproductive.process	1	1	NA
GO.0055059..asymmetric.neuroblast.division	1	1	NA
GO.0060582..cell.fate.determination.involved.in.pattern.specification	1	1	NA
GO.0090630..activation.of.GTPase.activity	1	1	NA
GO.0030246..carbohydrate.binding	0.685062	1	aman-2, gpcp-2
GO.0007368..determination.of.left.right.symmetry	1	1	NA
GO.0070491..repressing.transcription.factor.binding	1	1	NA
GO.0007030..Golgi.organization	1	1	NA
GO.0017119..Golgi.transport.complex	1	1	NA
GO.0000228..nuclear.chromosome	1	1	NA
GO.0007130..synaptonemal.complex.assembly	1	1	NA
GO.0051177..meiotic.sister.chromatid.cohesion	1	1	NA
GO.0002164..larval.development	1	1	NA
GO.0060107..annuli.extracellular.matrix	1	1	NA
GO.0060111..alae.of.collagen.and.cuticulin.based.cuticle.extracellular.matrix	1	1	NA
GO.0006950..response.to.stress	0.235466	1	enpl-1
GO.0008299..isoprenoid.biosynthetic.process	1	1	NA
GO.0031314..extrinsic.component.of.mitochondrial.inner.membrane	1	1	NA
GO.0002083..4.hydroxybenzoate.decaprenyltransferase.activity	1	1	NA
GO.0004659..prenyltransferase.activity	1	1	NA
GO.0047293..4.hydroxybenzoate.nonaprenyltransferase.activity	1	1	NA
GO.0008168..methyltransferase.activity	0.342957	1	ash-2, lin-59
GO.0008425..2.polyprenyl.6.methoxy.1.4.benzoquinone.methyltransferase.activity	1	1	NA
GO.0008757..S.adenosylmethionine.dependent.methyltransferase.activity	1	1	NA
GO.0016709..oxidoreductase.activity..acting.on.paired.donors..with.incorporation.or.reduction.of.molecular.oxygen..NAD.P.H.as.one.donor..and.incorporation.of.one.atom.of.oxygen	1	1	NA
GO.0044550..secondary.metabolite.biosynthetic.process	1	1	NA
GO.0000900..translation.repressor.activity..nucleic.acid.binding	1	1	NA
GO.0008135..translation.factor.activity..RNA.binding	1	1	NA
GO.0043022..ribosome.binding	1	1	NA
GO.1990124..messenger.ribonucleoprotein.complex	1	1	NA
GO.2000766..negative.regulation.of.cytoplasmic.translation	1	1	NA
GO.0005847..mRNA.cleavage.and.polyadenylation.specificity.factor.complex	1	1	NA
GO.0016607..nuclear.speck	1	1	NA
GO.0031124..mRNA.3.end.processing	1	1	NA
GO.0098789..pre.mRNA.cleavage.required.for.polyadenylation	1	1	NA
GO.0016810..hydrolase.activity..acting.on.carbon.nitrogen..but.not.peptide..bonds	1	1	NA
GO.0019239..deaminase.activity	0.176239	1	C06G3.5
GO.0031983..vesicle.lumen	1	1	NA
GO.0042718..yolk.granule	1	1	NA
GO.0051603..proteolysis.involved.in.cellular.protein.catabolic.process	1	1	NA
GO.0030016..myofibril	1	1	NA
GO.0000737..DNA.catabolic.process..endonucleolytic	0.0991094	1	nuc-1
GO.0004519..endonuclease.activity	1	1	NA
GO.0004520..endodeoxyribonuclease.activity	0.0991094	1	nuc-1
GO.0004521..endoribonuclease.activity	1	1	NA
GO.0006309..apoptotic.DNA.fragmentation	0.151288	1	nuc-1
GO.0006401..RNA.catabolic.process	1	1	NA
GO.0060102..collagen.and.cuticulin.based.cuticle.extracellular.matrix	1	1	NA
GO.0045177..apical.part.of.cell	1	1	NA
GO.0001223..transcription.coactivator.binding	1	1	NA
GO.0048256..flap.endonuclease.activity	1	1	NA
GO.0004536..deoxyribonuclease.activity	1	1	NA
GO.0016888..endodeoxyribonuclease.activity..producing.5.phosphomonoesters	1	1	NA
GO.0000178..exosome..RNase.complex.	1	1	NA
GO.0006139..nucleobase.containing.compound.metabolic.process	1	1	NA
GO.0008408..3.5.exonuclease.activity	1	1	NA
GO.0044237..cellular.metabolic.process	1	1	NA
GO.0000738..DNA.catabolic.process..exonucleolytic	1	1	NA
GO.0003697..single.stranded.DNA.binding	1	1	NA
GO.0004540..ribonuclease.activity	1	1	NA
GO.0090501..RNA.phosphodiester.bond.hydrolysis	1	1	NA
GO.0032077..positive.regulation.of.deoxyribonuclease.activity	1	1	NA
GO.0006259..DNA.metabolic.process	0.212302	1	nuc-1
GO.0004817..cysteine.tRNA.ligase.activity	1	1	NA
GO.0006418..tRNA.aminoacylation.for.protein.translation	1	1	NA
GO.0006423..cysteinyl.tRNA.aminoacylation	1	1	NA
GO.0005788..endoplasmic.reticulum.lumen	0.212302	1	enpl-1
GO.0031581..hemidesmosome.assembly	0.188438	1	eel-1
GO.0045471..response.to.ethanol	1	1	NA
GO.0009650..UV.protection	1	1	NA
GO.0007079..mitotic.chromosome.movement.towards.spindle.pole	1	1	NA
GO.0007080..mitotic.metaphase.plate.congression	1	1	NA
GO.1990385..meiotic.spindle.midzone	1	1	NA
GO.1990386..mitotic.cleavage.furrow.ingression	1	1	NA
GO.0030536..larval.feeding.behavior	1	1	NA
GO.0048747..muscle.fiber.development	1	1	NA
GO.0008180..COP9.signalosome	0.112446	1	Y38C1AA.12
GO.0010388..cullin.deneddylation	0.071835	1	Y38C1AA.12
GO.0019784..NEDD8.specific.protease.activity	1	1	NA
GO.0000338..protein.deneddylation	1	1	NA
GO.0017151..DEAD.H.box.RNA.helicase.binding	1	1	NA
GO.0031672..A.band	1	1	NA
GO.0097153..cysteine.type.endopeptidase.activity.involved.in.apoptotic.process	1	1	NA
GO.0042383..sarcolemma	1	1	NA
GO.0055074..calcium.ion.homeostasis	1	1	NA
GO.0009055..electron.carrier.activity	1	1	NA
GO.0022904..respiratory.electron.transport.chain	1	1	NA
GO.0070469..respiratory.chain	1	1	NA
GO.0004096..catalase.activity	1	1	NA
GO.0042542..response.to.hydrogen.peroxide	1	1	NA
GO.0007031..peroxisome.organization	1	1	NA
GO.0007266..Rho.protein.signal.transduction	0.151288	1	max-2
GO.0004108..citrate..Si..synthase.activity	1	1	NA
GO.0005759..mitochondrial.matrix	1	1	NA
GO.0006101..citrate.metabolic.process	1	1	NA
GO.0004008..copper.exporting.ATPase.activity	1	1	NA
GO.0005375..copper.ion.transmembrane.transporter.activity	1	1	NA
GO.0005507..copper.ion.binding	1	1	NA
GO.0005774..vacuolar.membrane	1	1	NA
GO.0006825..copper.ion.transport	1	1	NA
GO.0006878..cellular.copper.ion.homeostasis	1	1	NA
GO.0019829..cation.transporting.ATPase.activity	1	1	NA
GO.0030001..metal.ion.transport	1	1	NA
GO.0060003..copper.ion.export	1	1	NA
GO.0015677..copper.ion.import	1	1	NA
GO.0015680..intracellular.copper.ion.transport	1	1	NA
GO.0016530..metallochaperone.activity	1	1	NA
GO.0016531..copper.chaperone.activity	1	1	NA
GO.0008285..negative.regulation.of.cell.proliferation	1	1	NA
GO.0010826..negative.regulation.of.centrosome.duplication	1	1	NA
GO.0019005..SCF.ubiquitin.ligase.complex	1	1	NA
GO.0031647..regulation.of.protein.stability	1	1	NA
GO.0045930..negative.regulation.of.mitotic.cell.cycle	1	1	NA
GO.0008105..asymmetric.protein.localization	0.235466	1	csnk-1
GO.0019100..male.germ.line.sex.determination	1	1	NA
GO.0019102..male.somatic.sex.determination	1	1	NA
GO.0031461..cullin.RING.ubiquitin.ligase.complex	1	1	NA
GO.0036369..transcription.factor.catabolic.process	1	1	NA
GO.0042078..germ.line.stem.cell.division	1	1	NA
GO.0051232..meiotic.spindle.elongation	1	1	NA
GO.0051759..sister.chromosome.movement.towards.spindle.pole.involved.in.meiotic.sister.chromatid.segregation	1	1	NA
GO.1902104..positive.regulation.of.metaphase.anaphase.transition.of.meiotic.cell.cycle	1	1	NA
GO.0031463..Cul3.RING.ubiquitin.ligase.complex	1	1	NA
GO.0044257..cellular.protein.catabolic.process	1	1	NA
GO.0043161..proteasome.mediated.ubiquitin.dependent.protein.catabolic.process	0.0765847	1	wdr-23, C09E7.7
GO.0031466..Cul5.RING.ubiquitin.ligase.complex	1	1	NA
GO.0051607..defense.response.to.virus	1	1	NA
GO.0006897..endocytosis	1	1	NA
GO.0051788..response.to.misfolded.protein	1	1	NA
GO.0097038..perinuclear.endoplasmic.reticulum	1	1	NA
GO.0030100..regulation.of.endocytosis	1	1	NA
GO.0030659..cytoplasmic.vesicle.membrane	1	1	NA
GO.0005217..intracellular.ligand.gated.ion.channel.activity	1	1	NA
GO.0007041..lysosomal.transport	1	1	NA
GO.0010877..lipid.transport.involved.in.lipid.storage	1	1	NA
GO.0036019..endolysosome	1	1	NA
GO.0045806..negative.regulation.of.endocytosis	1	1	NA
GO.0005578..proteinaceous.extracellular.matrix	1	1	NA
GO.0030971..receptor.tyrosine.kinase.binding	1	1	NA
GO.0009948..anterior.posterior.axis.specification	1	1	NA
GO.0010084..specification.of.organ.axis.polarity	1	1	NA
GO.0033564..anterior.posterior.axon.guidance	1	1	NA
GO.0060573..cell.fate.specification.involved.in.pattern.specification	1	1	NA
GO.0045859..regulation.of.protein.kinase.activity	1	1	NA
GO.0000070..mitotic.sister.chromatid.segregation	0.268948	1	pqn-85
GO.0000079..regulation.of.cyclin.dependent.protein.serine.threonine.kinase.activity	1	1	NA
GO.0007098..centrosome.cycle	1	1	NA
GO.0010389..regulation.of.G2.M.transition.of.mitotic.cell.cycle	1	1	NA
GO.0045144..meiotic.sister.chromatid.segregation	1	1	NA
GO.0051383..kinetochore.organization	1	1	NA
GO.0051445..regulation.of.meiotic.cell.cycle	1	1	NA
GO.0007506..gonadal.mesoderm.development	0.163856	1	max-2
GO.1904787..positive.regulation.of.asymmetric.protein.localization.involved.in.cell.fate.determination	1	1	NA
GO.0005814..centriole	1	1	NA
GO.0007088..regulation.of.mitotic.nuclear.division	1	1	NA
GO.0008284..positive.regulation.of.cell.proliferation	1	1	NA
GO.0010608..posttranscriptional.regulation.of.gene.expression	1	1	NA
GO.0042023..DNA.endoreduplication	1	1	NA
GO.0048815..hermaphrodite.genitalia.morphogenesis	1	1	NA
GO.1904776..regulation.of.protein.localization.to.cell.cortex	1	1	NA
GO.0005826..actomyosin.contractile.ring	1	1	NA
GO.0016043..cellular.component.organization	1	1	NA
GO.0032154..cleavage.furrow	1	1	NA
GO.1902410..mitotic.cytokinetic.process	1	1	NA
GO.1903673..mitotic.cleavage.furrow.formation	1	1	NA
GO.0004843..thiol.dependent.ubiquitin.specific.protease.activity	0.188438	1	cyld-1
GO.0016579..protein.deubiquitination	0.0600485	1	duo-3, cyld-1
GO.0097149..centralspindlin.complex	1	1	NA
GO.0000413..protein.peptidyl.prolyl.isomerization	1	1	NA
GO.0003755..peptidyl.prolyl.cis.trans.isomerase.activity	1	1	NA
GO.0016853..isomerase.activity	0.585772	1	ipgm-1
GO.0030198..extracellular.matrix.organization	1	1	NA
GO.0005798..Golgi.associated.vesicle	1	1	NA
GO.0030122..AP.2.adaptor.complex	1	1	NA
GO.0030136..clathrin.coated.vesicle	1	1	NA
GO.0031982..vesicle	1	1	NA
GO.0032050..clathrin.heavy.chain.binding	1	1	NA
GO.0004579..dolichyl.diphosphooligosaccharide.protein.glycotransferase.activity	1	1	NA
GO.0008250..oligosaccharyltransferase.complex	1	1	NA
GO.0004675..transmembrane.receptor.protein.serine.threonine.kinase.activity	1	1	NA
GO.0004702..receptor.signaling.protein.serine.threonine.kinase.activity	1	1	NA
GO.0005024..transforming.growth.factor.beta.activated.receptor.activity	1	1	NA
GO.0007178..transmembrane.receptor.protein.serine.threonine.kinase.signaling.pathway	1	1	NA
GO.0007179..transforming.growth.factor.beta.receptor.signaling.pathway	1	1	NA
GO.0023014..signal.transduction.by.protein.phosphorylation	1	1	NA
GO.0005009..insulin.activated.receptor.activity	1	1	NA
GO.0010260..organ.senescence	1	1	NA
GO.0017046..peptide.hormone.binding	1	1	NA
GO.0040034..regulation.of.development..heterochronic	0.22397	1	lin-41
GO.0042169..SH2.domain.binding	1	1	NA
GO.0042992..negative.regulation.of.transcription.factor.import.into.nucleus	1	1	NA
GO.0043054..dauer.exit	1	1	NA
GO.0051425..PTB.domain.binding	1	1	NA
GO.1901031..regulation.of.response.to.reactive.oxygen.species	1	1	NA
GO.2000785..regulation.of.autophagosome.assembly	1	1	NA
GO.0001158..enhancer.sequence.specific.DNA.binding	1	1	NA
GO.0022604..regulation.of.cell.morphogenesis	1	1	NA
GO.0030509..BMP.signaling.pathway	0.0855734	1	tig-2
GO.0030513..positive.regulation.of.BMP.signaling.pathway	1	1	NA
GO.0030514..negative.regulation.of.BMP.signaling.pathway	1	1	NA
GO.0036122..BMP.binding	1	1	NA
GO.0046332..SMAD.binding	1	1	NA
GO.0008158..hedgehog.receptor.activity	1	1	NA
GO.0009653..anatomical.structure.morphogenesis	1	1	NA
GO.0046626..regulation.of.insulin.receptor.signaling.pathway	1	1	NA
GO.0005125..cytokine.activity	0.0855734	1	tig-2
GO.0005160..transforming.growth.factor.beta.receptor.binding	0.071835	1	tig-2
GO.0008083..growth.factor.activity	0.0991094	1	tig-2
GO.0010862..positive.regulation.of.pathway.restricted.SMAD.protein.phosphorylation	0.071835	1	tig-2
GO.0043408..regulation.of.MAPK.cascade	0.125586	1	tig-2
GO.0048468..cell.development	0.176239	1	tig-2
GO.0060395..SMAD.protein.signal.transduction	0.071835	1	tig-2
GO.0043476..pigment.accumulation	1	1	NA
GO.0007267..cell.cell.signaling	1	1	NA
GO.0008202..steroid.metabolic.process	1	1	NA
GO.0008203..cholesterol.metabolic.process	1	1	NA
GO.0008395..steroid.hydroxylase.activity	1	1	NA
GO.0047749..cholestanetriol.26.monooxygenase.activity	1	1	NA
GO.0097500..receptor.localization.to.nonmotile.primary.cilium	1	1	NA
GO.0007168..receptor.guanylyl.cyclase.signaling.pathway	1	1	NA
GO.0007608..sensory.perception.of.smell	1	1	NA
GO.0008074..guanylate.cyclase.complex..soluble	1	1	NA
GO.0019236..response.to.pheromone	1	1	NA
GO.0019932..second.messenger.mediated.signaling	1	1	NA
GO.0030511..positive.regulation.of.transforming.growth.factor.beta.receptor.signaling.pathway	1	1	NA
GO.0004879..RNA.polymerase.II.transcription.factor.activity..ligand.activated.sequence.specific.DNA.binding	1	1	NA
GO.0043401..steroid.hormone.mediated.signaling.pathway	0.146798	1	nhr-48, nhr-66, nhr-19, nhr-61, nhr-49
GO.0031931..TORC1.complex	1	1	NA
GO.0002821..positive.regulation.of.adaptive.immune.response	1	1	NA
GO.0010564..regulation.of.cell.cycle.process	1	1	NA
GO.0033613..activating.transcription.factor.binding	1	1	NA
GO.0034605..cellular.response.to.heat	1	1	NA
GO.0040008..regulation.of.growth	1	1	NA
GO.0040015..negative.regulation.of.multicellular.organism.growth	0.112446	1	egl-4
GO.0043620..regulation.of.DNA.templated.transcription.in.response.to.stress	1	1	NA
GO.0046890..regulation.of.lipid.biosynthetic.process	1	1	NA
GO.0060537..muscle.tissue.development	1	1	NA
GO.1900426..positive.regulation.of.defense.response.to.bacterium	1	1	NA
GO.1990381..ubiquitin.specific.protease.binding	1	1	NA
GO.0000978..RNA.polymerase.II.core.promoter.proximal.region.sequence.specific.DNA.binding	1	1	NA
GO.1902855..regulation.of.nonmotile.primary.cilium.assembly	1	1	NA
GO.0006611..protein.export.from.nucleus	1	1	NA
GO.0061077..chaperone.mediated.protein.folding	1	1	NA
GO.0006970..response.to.osmotic.stress	1	1	NA
GO.0097499..protein.localization.to.nonmotile.primary.cilium	1	1	NA
GO.0005158..insulin.receptor.binding	1	1	NA
GO.0005179..hormone.activity	1	1	NA
GO.0042990..regulation.of.transcription.factor.import.into.nucleus	1	1	NA
GO.0004596..peptide.alpha.N.acetyltransferase.activity	0.071835	1	F40F4.7
GO.0006475..internal.protein.amino.acid.acetylation	1	1	NA
GO.0017198..N.terminal.peptidyl.serine.acetylation	1	1	NA
GO.0018002..N.terminal.peptidyl.glutamic.acid.acetylation	1	1	NA
GO.0031415..NatA.complex	1	1	NA
GO.0032504..multicellular.organism.reproduction	1	1	NA
GO.0051091..positive.regulation.of.sequence.specific.DNA.binding.transcription.factor.activity	1	1	NA
GO.1990189..peptide.serine.N.acetyltransferase.activity	1	1	NA
GO.1990190..peptide.glutamate.N.acetyltransferase.activity	1	1	NA
GO.0004488..methylenetetrahydrofolate.dehydrogenase..NADP...activity	1	1	NA
GO.0009396..folic.acid.containing.compound.biosynthetic.process	1	1	NA
GO.0009303..rRNA.transcription	1	1	NA
GO.0003735..structural.constituent.of.ribosome	0.921886	1	R07E3.4
GO.0005761..mitochondrial.ribosome	1	1	NA
GO.0005763..mitochondrial.small.ribosomal.subunit	1	1	NA
GO.0015935..small.ribosomal.subunit	1	1	NA
GO.0005254..chloride.channel.activity	1	1	NA
GO.0005275..amine.transmembrane.transporter.activity	1	1	NA
GO.0005328..neurotransmitter.sodium.symporter.activity	1	1	NA
GO.0005329..dopamine.transmembrane.transporter.activity	1	1	NA
GO.0005330..dopamine.sodium.symporter.activity	1	1	NA
GO.0006836..neurotransmitter.transport	0.30097	1	dyb-1
GO.0015837..amine.transport	1	1	NA
GO.0030673..axolemma	0.071835	1	sax-7
GO.0032590..dendrite.membrane	0.0855734	1	sax-7
GO.0042734..presynaptic.membrane	1	1	NA
GO.0051583..dopamine.uptake.involved.in.synaptic.transmission	1	1	NA
GO.0090494..dopamine.uptake	1	1	NA
GO.0045793..positive.regulation.of.cell.size	0.071835	1	wts-1
GO.0046622..positive.regulation.of.organ.growth	1	1	NA
GO.0000398..mRNA.splicing..via.spliceosome	1	1	NA
GO.0008419..RNA.lariat.debranching.enzyme.activity	1	1	NA
GO.0016788..hydrolase.activity..acting.on.ester.bonds	0.360887	1	F57C2.5
GO.0006306..DNA.methylation	1	1	NA
GO.0016581..NuRD.complex	1	1	NA
GO.0004525..ribonuclease.III.activity	1	1	NA
GO.0004530..deoxyribonuclease.I.activity	1	1	NA
GO.0016442..RISC.complex	1	1	NA
GO.0016891..endoribonuclease.activity..producing.5.phosphomonoesters	1	1	NA
GO.0030422..production.of.siRNA.involved.in.RNA.interference	1	1	NA
GO.0031050..dsRNA.fragmentation	1	1	NA
GO.0031054..pre.miRNA.processing	1	1	NA
GO.2000636..positive.regulation.of.primary.miRNA.processing	1	1	NA
GO.0000288..nuclear.transcribed.mRNA.catabolic.process..deadenylation.dependent.decay	1	1	NA
GO.0000290..deadenylation.dependent.decapping.of.nuclear.transcribed.mRNA	1	1	NA
GO.0000340..RNA.7.methylguanosine.cap.binding	1	1	NA
GO.0004780..sulfate.adenylyltransferase..ADP..activity	1	1	NA
GO.0006402..mRNA.catabolic.process	1	1	NA
GO.0006790..sulfur.compound.metabolic.process	1	1	NA
GO.0009150..purine.ribonucleotide.metabolic.process	1	1	NA
GO.0047627..adenylylsulfatase.activity	1	1	NA
GO.0050072..m7G.5.pppN.diphosphatase.activity	1	1	NA
GO.0007016..cytoskeletal.anchoring.at.plasma.membrane	1	1	NA
GO.0005272..sodium.channel.activity	1	1	NA
GO.0010447..response.to.acidic.pH	1	1	NA
GO.0035725..sodium.ion.transmembrane.transport	1	1	NA
GO.0043200..response.to.amino.acid	1	1	NA
GO.0043067..regulation.of.programmed.cell.death	1	1	NA
GO.0004143..diacylglycerol.kinase.activity	1	1	NA
GO.0007205..protein.kinase.C.activating.G.protein.coupled.receptor.signaling.pathway	1	1	NA
GO.0007210..serotonin.receptor.signaling.pathway	0.0855734	1	egl-30
GO.0007212..dopamine.receptor.signaling.pathway	0.138533	1	egl-30
GO.0044297..cell.body	1	1	NA
GO.0046834..lipid.phosphorylation	1	1	NA
GO.0043052..thermotaxis	1	1	NA
GO.0048169..regulation.of.long.term.neuronal.synaptic.plasticity	1	1	NA
GO.0009925..basal.plasma.membrane	1	1	NA
GO.0016010..dystrophin.associated.glycoprotein.complex	0.071835	1	dyb-1
GO.0043236..laminin.binding	1	1	NA
GO.0008090..retrograde.axonal.transport	1	1	NA
GO.0016322..neuron.remodeling	1	1	NA
GO.0035047..centrosomal.and.pronuclear.rotation	1	1	NA
GO.0048814..regulation.of.dendrite.morphogenesis	0.071835	1	unc-116
GO.0051293..establishment.of.spindle.localization	1	1	NA
GO.1902473..regulation.of.protein.localization.to.synapse	1	1	NA
GO.1990048..anterograde.dense.core.granule.transport	1	1	NA
GO.0004157..dihydropyrimidinase.activity	1	1	NA
GO.0006208..pyrimidine.nucleobase.catabolic.process	1	1	NA
GO.0016812..hydrolase.activity..acting.on.carbon.nitrogen..but.not.peptide..bonds..in.cyclic.amides	1	1	NA
GO.0046113..nucleobase.catabolic.process	1	1	NA
GO.0005811..lipid.particle	1	1	NA
GO.0033555..multicellular.organismal.response.to.stress	1	1	NA
GO.0016229..steroid.dehydrogenase.activity	1	1	NA
GO.0004090..carbonyl.reductase..NADPH..activity	1	1	NA
GO.0005997..xylulose.metabolic.process	1	1	NA
GO.0005998..xylulose.catabolic.process	1	1	NA
GO.0006006..glucose.metabolic.process	1	1	NA
GO.0042732..D.xylose.metabolic.process	1	1	NA
GO.0050038..L.xylulose.reductase..NADP...activity	1	1	NA
GO.0051289..protein.homotetramerization	1	1	NA
GO.0000038..very.long.chain.fatty.acid.metabolic.process	1	1	NA
GO.0006637..acyl.CoA.metabolic.process	0.163856	1	C37H5.13
GO.0010888..negative.regulation.of.lipid.storage	1	1	NA
GO.0042811..pheromone.biosynthetic.process	1	1	NA
GO.0048639..positive.regulation.of.developmental.growth	1	1	NA
GO.1904070..ascaroside.biosynthetic.process	1	1	NA
GO.0006839..mitochondrial.transport	1	1	NA
GO.0000175..3.5.exoribonuclease.activity	1	1	NA
GO.0006364..rRNA.processing	1	1	NA
GO.0003887..DNA.directed.DNA.polymerase.activity	1	1	NA
GO.0005658..alpha.DNA.polymerase.primase.complex	1	1	NA
GO.0071897..DNA.biosynthetic.process	1	1	NA
GO.0005875..microtubule.associated.complex	1	1	NA
GO.0004385..guanylate.kinase.activity	1	1	NA
GO.0008328..ionotropic.glutamate.receptor.complex	1	1	NA
GO.0035255..ionotropic.glutamate.receptor.binding	1	1	NA
GO.0043113..receptor.clustering	1	1	NA
GO.0045186..zonula.adherens.assembly	1	1	NA
GO.0045197..establishment.or.maintenance.of.epithelial.cell.apical.basal.polarity	1	1	NA
GO.0046037..GMP.metabolic.process	1	1	NA
GO.0046710..GDP.metabolic.process	1	1	NA
GO.0005868..cytoplasmic.dynein.complex	1	1	NA
GO.0035371..microtubule.plus.end	1	1	NA
GO.0000186..activation.of.MAPKK.activity	0.071835	1	dlk-1
GO.0004709..MAP.kinase.kinase.kinase.activity	0.071835	1	dlk-1
GO.0000014..single.stranded.DNA.endodeoxyribonuclease.activity	1	1	NA
GO.0043141..ATP.dependent.5.3.DNA.helicase.activity	1	1	NA
GO.0043142..single.stranded.DNA.dependent.ATPase.activity	1	1	NA
GO.0007097..nuclear.migration	1	1	NA
GO.0010970..establishment.of.localization.by.movement.along.microtubule	1	1	NA
GO.0045502..dynein.binding	1	1	NA
GO.0045505..dynein.intermediate.chain.binding	1	1	NA
GO.0000242..pericentriolar.material	1	1	NA
GO.0006469..negative.regulation.of.protein.kinase.activity	1	1	NA
GO.0051787..misfolded.protein.binding	1	1	NA
GO.0045454..cell.redox.homeostasis	1	1	NA
GO.0031072..heat.shock.protein.binding	1	1	NA
GO.0007269..neurotransmitter.secretion	1	1	NA
GO.0016226..iron.sulfur.cluster.assembly	1	1	NA
GO.0051259..protein.oligomerization	1	1	NA
GO.0015036..disulfide.oxidoreductase.activity	1	1	NA
GO.0034975..protein.folding.in.endoplasmic.reticulum	1	1	NA
GO.0008026..ATP.dependent.helicase.activity	1	1	NA
GO.0043570..maintenance.of.DNA.repeat.elements	1	1	NA
GO.0090329..regulation.of.DNA.dependent.DNA.replication	1	1	NA
GO.0009794..regulation.of.mitotic.cell.cycle..embryonic	1	1	NA
GO.0001588..dopamine.neurotransmitter.receptor.activity..coupled.via.Gs	1	1	NA
GO.0001963..synaptic.transmission..dopaminergic	1	1	NA
GO.0007191..adenylate.cyclase.activating.dopamine.receptor.signaling.pathway	1	1	NA
GO.0035240..dopamine.binding	1	1	NA
GO.0051379..epinephrine.binding	1	1	NA
GO.0051380..norepinephrine.binding	1	1	NA
GO.0001591..dopamine.neurotransmitter.receptor.activity..coupled.via.Gi.Go	1	1	NA
GO.0060108..annular.furrow.extracellular.matrix	1	1	NA
GO.0003756..protein.disulfide.isomerase.activity	1	1	NA
GO.0015035..protein.disulfide.oxidoreductase.activity	1	1	NA
GO.0034976..response.to.endoplasmic.reticulum.stress	1	1	NA
GO.0004656..procollagen.proline.4.dioxygenase.activity	1	1	NA
GO.0016702..oxidoreductase.activity..acting.on.single.donors.with.incorporation.of.molecular.oxygen..incorporation.of.two.atoms.of.oxygen	1	1	NA
GO.0019511..peptidyl.proline.hydroxylation	1	1	NA
GO.0031418..L.ascorbic.acid.binding	1	1	NA
GO.0031545..peptidyl.proline.4.dioxygenase.activity	1	1	NA
GO.0043412..macromolecule.modification	1	1	NA
GO.0051213..dioxygenase.activity	0.279781	1	jmjd-1.2
GO.0000030..mannosyltransferase.activity	1	1	NA
GO.0005637..nuclear.inner.membrane	0.0855734	1	dhcr-7
GO.0018406..protein.C.linked.glycosylation.via.2.alpha.mannosyl.L.tryptophan	1	1	NA
GO.0000805..X.chromosome	1	1	NA
GO.0001104..RNA.polymerase.II.transcription.cofactor.activity	1	1	NA
GO.0016592..mediator.complex	1	1	NA
GO.0005905..coated.pit	0.071835	1	rme-4
GO.0061357..positive.regulation.of.Wnt.protein.secretion	1	1	NA
GO.1990075..periciliary.membrane.compartment	1	1	NA
GO.0042464..dosage.compensation.by.hypoactivation.of.X.chromosome	1	1	NA
GO.0046536..dosage.compensation.complex	1	1	NA
GO.0000799..nuclear.condensin.complex	1	1	NA
GO.0010032..meiotic.chromosome.condensation	1	1	NA
GO.0045128..negative.regulation.of.reciprocal.meiotic.recombination	1	1	NA
GO.0051304..chromosome.separation	1	1	NA
GO.0006348..chromatin.silencing.at.telomere	1	1	NA
GO.0042800..histone.methyltransferase.activity..H3.K4.specific.	0.112446	1	ash-2
GO.0051568..histone.H3.K4.methylation	0.125586	1	ash-2
GO.0000151..ubiquitin.ligase.complex	1	1	NA
GO.0008078..mesodermal.cell.migration	1	1	NA
GO.0000266..mitochondrial.fission	1	1	NA
GO.0008637..apoptotic.mitochondrial.changes	1	1	NA
GO.0004815..aspartate.tRNA.ligase.activity	1	1	NA
GO.0006422..aspartyl.tRNA.aminoacylation	1	1	NA
GO.2000748..positive.regulation.of.defecation.rhythm	1	1	NA
GO.0060069..Wnt.signaling.pathway..regulating.spindle.positioning	1	1	NA
GO.0060071..Wnt.signaling.pathway..planar.cell.polarity.pathway	1	1	NA
GO.0048546..digestive.tract.morphogenesis	1	1	NA
GO.0005277..acetylcholine.transmembrane.transporter.activity	0.071835	1	dyb-1
GO.0007626..locomotory.behavior	0.246793	1	dyb-1
GO.0032224..positive.regulation.of.synaptic.transmission..cholinergic	0.0855734	1	dyb-1
GO.0046716..muscle.cell.cellular.homeostasis	0.071835	1	dyb-1
GO.0008307..structural.constituent.of.muscle	1	1	NA
GO.0030235..nitric.oxide.synthase.regulator.activity	1	1	NA
GO.0005879..axonemal.microtubule	1	1	NA
GO.0060271..cilium.morphogenesis	1	1	NA
GO.0000165..MAPK.cascade	0.311331	1	unc-43
GO.0004707..MAP.kinase.activity	1	1	NA
GO.0003391..amphid.sensory.organ.dendrite.retrograde.extension	1	1	NA
GO.0043621..protein.self.association	0.188438	1	srgp-1
GO.0006461..protein.complex.assembly	1	1	NA
GO.0055088..lipid.homeostasis	1	1	NA
GO.0031143..pseudopodium	1	1	NA
GO.0090386..phagosome.maturation.involved.in.apoptotic.cell.clearance	1	1	NA
GO.0043056..forward.locomotion	1	1	NA
GO.0045203..integral.component.of.cell.outer.membrane	1	1	NA
GO.0060378..regulation.of.brood.size	1	1	NA
GO.0000303..response.to.superoxide	1	1	NA
GO.0008053..mitochondrial.fusion	1	1	NA
GO.0035264..multicellular.organism.growth	1	1	NA
GO.0006820..anion.transport	1	1	NA
GO.0008344..adult.locomotory.behavior	1	1	NA
GO.0022857..transmembrane.transporter.activity	0.396061	1	folt-1, svop-1
GO.0030672..synaptic.vesicle.membrane	1	1	NA
GO.0061096..negative.regulation.of.turning.behavior.involved.in.mating	1	1	NA
GO.0005243..gap.junction.channel.activity	1	1	NA
GO.0055077..gap.junction.hemi.channel.activity	1	1	NA
GO.0005391..sodium.potassium.exchanging.ATPase.activity	1	1	NA
GO.0006813..potassium.ion.transport	0.441311	1	kcc-2
GO.0006883..cellular.sodium.ion.homeostasis	1	1	NA
GO.0006937..regulation.of.muscle.contraction	1	1	NA
GO.0010107..potassium.ion.import	1	1	NA
GO.0010248..establishment.or.maintenance.of.transmembrane.electrochemical.gradient	1	1	NA
GO.0030007..cellular.potassium.ion.homeostasis	1	1	NA
GO.0036376..sodium.ion.export.from.cell	1	1	NA
GO.0005834..heterotrimeric.G.protein.complex	0.235466	1	egl-30
GO.0008277..regulation.of.G.protein.coupled.receptor.protein.signaling.pathway	1	1	NA
GO.0030845..phospholipase.C.inhibiting.G.protein.coupled.receptor.signaling.pathway	1	1	NA
GO.0043087..regulation.of.GTPase.activity	1	1	NA
GO.0050804..modulation.of.synaptic.transmission	1	1	NA
GO.0022834..ligand.gated.channel.activity	1	1	NA
GO.0045161..neuronal.ion.channel.clustering	1	1	NA
GO.0004084..branched.chain.amino.acid.transaminase.activity	1	1	NA
GO.0008483..transaminase.activity	1	1	NA
GO.0008652..cellular.amino.acid.biosynthetic.process	1	1	NA
GO.0009081..branched.chain.amino.acid.metabolic.process	1	1	NA
GO.0009082..branched.chain.amino.acid.biosynthetic.process	1	1	NA
GO.0052654..L.leucine.transaminase.activity	1	1	NA
GO.0052655..L.valine.transaminase.activity	1	1	NA
GO.0052656..L.isoleucine.transaminase.activity	1	1	NA
GO.0003857..3.hydroxyacyl.CoA.dehydrogenase.activity	1	1	NA
GO.0004300..enoyl.CoA.hydratase.activity	1	1	NA
GO.0006635..fatty.acid.beta.oxidation	1	1	NA
GO.0016507..mitochondrial.fatty.acid.beta.oxidation.multienzyme.complex	1	1	NA
GO.0000768..syncytium.formation.by.plasma.membrane.fusion	1	1	NA
GO.0044291..cell.cell.contact.zone	1	1	NA
GO.0090597..nematode.male.tail.mating.organ.morphogenesis	1	1	NA
GO.0048557..embryonic.digestive.tract.morphogenesis	1	1	NA
GO.0046875..ephrin.receptor.binding	1	1	NA
GO.0048013..ephrin.receptor.signaling.pathway	1	1	NA
GO.0060280..negative.regulation.of.ovulation	1	1	NA
GO.0031225..anchored.component.of.membrane	1	1	NA
GO.0042074..cell.migration.involved.in.gastrulation	0.0855734	1	sax-7
GO.0032091..negative.regulation.of.protein.binding	1	1	NA
GO.0005267..potassium.channel.activity	0.504299	1	twk-24
GO.0031528..microvillus.membrane	1	1	NA
GO.0030070..insulin.processing	1	1	NA
GO.0090325..regulation.of.locomotion.involved.in.locomotory.behavior	1	1	NA
GO.0004435..phosphatidylinositol.phospholipase.C.activity	1	1	NA
GO.0007320..insemination	1	1	NA
GO.0016042..lipid.catabolic.process	1	1	NA
GO.0034609..spicule.insertion	1	1	NA
GO.0018401..peptidyl.proline.hydroxylation.to.4.hydroxy.L.proline	1	1	NA
GO.0007622..rhythmic.behavior	1	1	NA
GO.0009968..negative.regulation.of.signal.transduction	1	1	NA
GO.0048664..neuron.fate.determination	1	1	NA
GO.0005104..fibroblast.growth.factor.receptor.binding	1	1	NA
GO.0008543..fibroblast.growth.factor.receptor.signaling.pathway	1	1	NA
GO.0061025..membrane.fusion	1	1	NA
GO.0035545..determination.of.left.right.asymmetry.in.nervous.system	1	1	NA
GO.0004180..carboxypeptidase.activity	0.246793	1	egl-21
GO.0004181..metallocarboxypeptidase.activity	0.200459	1	egl-21
GO.0004185..serine.type.carboxypeptidase.activity	0.268948	1	egl-21
GO.0006518..peptide.metabolic.process	0.112446	1	egl-21
GO.0022841..potassium.ion.leak.channel.activity	0.41569	1	twk-24
GO.0030322..stabilization.of.membrane.potential	0.41569	1	twk-24
GO.0001664..G.protein.coupled.receptor.binding	0.268948	1	egl-30
GO.0019001..guanyl.nucleotide.binding	0.212302	1	egl-30
GO.0031683..G.protein.beta.gamma.subunit.complex.binding	0.212302	1	egl-30
GO.0005251..delayed.rectifier.potassium.channel.activity	1	1	NA
GO.0008076..voltage.gated.potassium.channel.complex	1	1	NA
GO.0051260..protein.homooligomerization	1	1	NA
GO.0060065..uterus.development	1	1	NA
GO.0031536..positive.regulation.of.exit.from.mitosis	1	1	NA
GO.0048675..axon.extension	1	1	NA
GO.0001731..formation.of.translation.preinitiation.complex	1	1	NA
GO.0003743..translation.initiation.factor.activity	1	1	NA
GO.0005852..eukaryotic.translation.initiation.factor.3.complex	1	1	NA
GO.0006413..translational.initiation	1	1	NA
GO.0006446..regulation.of.translational.initiation	1	1	NA
GO.0016282..eukaryotic.43S.preinitiation.complex	1	1	NA
GO.0033290..eukaryotic.48S.preinitiation.complex	1	1	NA
GO.0045182..translation.regulator.activity	1	1	NA
GO.0055057..neuroblast.division	1	1	NA
GO.0050909..sensory.perception.of.taste	1	1	NA
GO.0001172..transcription..RNA.templated	1	1	NA
GO.0003968..RNA.directed.RNA.polymerase.activity	1	1	NA
GO.0031081..nuclear.pore.distribution	1	1	NA
GO.0070090..metaphase.plate	1	1	NA
GO.0043162..ubiquitin.dependent.protein.catabolic.process.via.the.multivesicular.body.sorting.pathway	1	1	NA
GO.1903361..protein.localization.to.basolateral.plasma.membrane	1	1	NA
GO.0048488..synaptic.vesicle.endocytosis	0.0991094	1	unc-26
GO.0031369..translation.initiation.factor.binding	1	1	NA
GO.0071541..eukaryotic.translation.initiation.factor.3.complex..eIF3m	1	1	NA
GO.0042254..ribosome.biogenesis	1	1	NA
GO.0042256..mature.ribosome.assembly	1	1	NA
GO.0042273..ribosomal.large.subunit.biogenesis	1	1	NA
GO.0043023..ribosomal.large.subunit.binding	1	1	NA
GO.0006368..transcription.elongation.from.RNA.polymerase.II.promoter	0.138533	1	ell-1
GO.0030891..VCB.complex	1	1	NA
GO.0031462..Cul2.RING.ubiquitin.ligase.complex	1	1	NA
GO.0070449..elongin.complex	1	1	NA
GO.0032968..positive.regulation.of.transcription.elongation.from.RNA.polymerase.II.promoter	1	1	NA
GO.0006636..unsaturated.fatty.acid.biosynthetic.process	1	1	NA
GO.0001162..RNA.polymerase.II.intronic.transcription.regulatory.region.sequence.specific.DNA.binding	1	1	NA
GO.0007507..heart.development	1	1	NA
GO.0009887..organ.morphogenesis	1	1	NA
GO.0048565..digestive.tract.development	1	1	NA
GO.0048646..anatomical.structure.formation.involved.in.morphogenesis	1	1	NA
GO.0003705..transcription.factor.activity..RNA.polymerase.II.distal.enhancer.sequence.specific.binding	1	1	NA
GO.0007586..digestion	1	1	NA
GO.0030856..regulation.of.epithelial.cell.differentiation	1	1	NA
GO.1902097..positive.regulation.of.transcription.from.RNA.polymerase.II.promoter.involved.in.defense.response.to.Gram.negative.bacterium	1	1	NA
GO.0000983..transcription.factor.activity..RNA.polymerase.II.core.promoter.sequence.specific	1	1	NA
GO.0061404..positive.regulation.of.transcription.from.RNA.polymerase.II.promoter.in.response.to.increased.salt	1	1	NA
GO.1901244..positive.regulation.of.transcription.from.RNA.polymerase.II.promoter.involved.in.defense.response.to.fungus	1	1	NA
GO.0005681..spliceosomal.complex	1	1	NA
GO.0032784..regulation.of.DNA.templated.transcription..elongation	1	1	NA
GO.0010181..FMN.binding	0.200459	1	emb-8
GO.0005201..extracellular.matrix.structural.constituent	1	1	NA
GO.0050714..positive.regulation.of.protein.secretion	1	1	NA
GO.0007091..metaphase.anaphase.transition.of.mitotic.cell.cycle	1	1	NA
GO.0030071..regulation.of.mitotic.metaphase.anaphase.transition	1	1	NA
GO.0031145..anaphase.promoting.complex.dependent.catabolic.process	1	1	NA
GO.0001555..oocyte.growth	1	1	NA
GO.0006605..protein.targeting	1	1	NA
GO.0015450..P.P.bond.hydrolysis.driven.protein.transmembrane.transporter.activity	1	1	NA
GO.0071806..protein.transmembrane.transport	1	1	NA
GO.0005521..lamin.binding	1	1	NA
GO.0005639..integral.component.of.nuclear.inner.membrane	1	1	NA
GO.0007493..endodermal.cell.fate.determination	1	1	NA
GO.0005337..nucleoside.transmembrane.transporter.activity	1	1	NA
GO.1901642..nucleoside.transmembrane.transport	1	1	NA
GO.0051402..neuron.apoptotic.process	1	1	NA
GO.0007231..osmosensory.signaling.pathway	1	1	NA
GO.0005034..osmosensor.activity	1	1	NA
GO.0007414..axonal.defasciculation	1	1	NA
GO.0010950..positive.regulation.of.endopeptidase.activity	1	1	NA
GO.0071711..basement.membrane.organization	1	1	NA
GO.0032009..early.phagosome	1	1	NA
GO.0005903..brush.border	1	1	NA
GO.0030056..hemidesmosome	1	1	NA
GO.0045109..intermediate.filament.organization	1	1	NA
GO.0045185..maintenance.of.protein.location	1	1	NA
GO.0048730..epidermis.morphogenesis	1	1	NA
GO.0051017..actin.filament.bundle.assembly	1	1	NA
GO.0006621..protein.retention.in.ER.lumen	1	1	NA
GO.0046923..ER.retention.sequence.binding	1	1	NA
GO.0000467..exonucleolytic.trimming.to.generate.mature.3.end.of.5.8S.rRNA.from.tricistronic.rRNA.transcript..SSU.rRNA..5.8S.rRNA..LSU.rRNA.	1	1	NA
GO.1900369..negative.regulation.of.RNA.interference	1	1	NA
GO.0019898..extrinsic.component.of.membrane	0.212302	1	mtm-3
GO.0031941..filamentous.actin	1	1	NA
GO.0031974..membrane.enclosed.lumen	1	1	NA
GO.0045179..apical.cortex	1	1	NA
GO.0016671..oxidoreductase.activity..acting.on.a.sulfur.group.of.donors..disulfide.as.acceptor	1	1	NA
GO.0004819..glutamine.tRNA.ligase.activity	1	1	NA
GO.0006425..glutaminyl.tRNA.aminoacylation	1	1	NA
GO.0004818..glutamate.tRNA.ligase.activity	1	1	NA
GO.0006424..glutamyl.tRNA.aminoacylation	1	1	NA
GO.0019013..viral.nucleocapsid	1	1	NA
GO.0000982..transcription.factor.activity..RNA.polymerase.II.core.promoter.proximal.region.sequence.specific.binding	1	1	NA
GO.0060142..regulation.of.syncytium.formation.by.plasma.membrane.fusion	1	1	NA
GO.0007064..mitotic.sister.chromatid.cohesion	1	1	NA
GO.0005818..aster	0.0991094	1	csnk-1
GO.0030540..female.genitalia.development	1	1	NA
GO.0043622..cortical.microtubule.organization	1	1	NA
[truncated: 3,319 more rows]

## Sheet: N3MvF3M-N3Mup-withCEH18peak
	p.values	FDR.BH	genes
GO.0005840..ribosome	3.67294e-14	1.95327e-10	rpl-38, rps-24, rpl-15, rps-28, rps-4, rps-11, rpl-29, rps-18, mrpl-15, rps-17, rps-15, rpl-14, rps-14, rpl-35, rpl-21
GO.0006412..translation	2.14304e-13	3.7989e-10	rpl-38, rps-24, rpl-15, rps-28, rps-4, rps-11, rpl-29, rps-18, iff-2, mrpl-15, rps-17, rps-15, rpl-14, eif-3.E, rps-14, rpl-35, rpl-21
GO.0003735..structural.constituent.of.ribosome	2.1428e-13	3.7989e-10	rpl-38, rps-24, rpl-15, rps-28, rps-4, rps-11, rpl-29, rps-18, mrpl-15, rps-17, rps-15, rpl-14, rps-14, rpl-35, rpl-21
GO.0030529..intracellular.ribonucleoprotein.complex	8.29583e-11	1.10293e-07	rpl-38, rpl-15, rps-28, rps-4, rps-11, rps-18, mrpl-15, rps-17, rps-15, rps-14, rpl-35, rpl-21
GO.0002119..nematode.larval.development	4.3365e-10	4.6123e-07	unc-62, Y57E12AL.6, emo-1, R04F11.2, tomm-20, rpl-38, hsp-3, rps-24, rpl-15, rps-28, his-62, ric-3, rps-11, coq-3, ntl-2, hlh-1, F58F12.1, iff-2, icd-2, mrpl-15, epg-2, pas-3, rps-17, rps-15, rpl-14, eif-3.E, tbx-2, hmg-1.2, rps-14, ceh-13, rpl-35, K12H4.5, rpl-21, pat-2, vha-1
GO.0022627..cytosolic.small.ribosomal.subunit	1.60638e-08	1.42379e-05	rps-24, rps-28, rps-4, rps-17, rps-15, rps-14
GO.0022625..cytosolic.large.ribosomal.subunit	3.5087e-07	0.000266561	rpl-38, rpl-15, rpl-29, rpl-14, rpl-35, rpl-21
GO.0005622..intracellular	2.56e-06	0.00170176	rpl-38, rps-24, rpl-15, rps-28, rps-4, rps-11, rpl-29, rps-18, rps-17, rpl-14, rpl-35, rpl-21
GO.0009792..embryo.development.ending.in.birth.or.egg.hatching	9.04037e-06	0.00534185	unc-62, Y57E12AL.6, emo-1, R04F11.2, tomm-20, tni-1, rpl-15, hil-7, rps-4, his-62, ric-3, C33D9.13, rps-11, ntl-2, hlh-1, phb-2, F58F12.1, iff-2, icd-2, mrpl-15, epg-2, pas-3, rps-17, F02E9.5, rps-15, rpl-14, eif-3.E, hmg-1.2, rps-14, ceh-13, rpl-35, K12H4.5, rpl-21, C14B9.10, pat-2, vha-1
GO.0000003..reproduction	1.6632e-05	0.0088449	sti-1, Y57E12AL.6, emo-1, tomm-20, rpl-38, hsp-3, rps-24, rpl-15, rps-28, rps-11, rps-18, ntl-2, hlh-1, phb-2, F58F12.1, iff-2, icd-2, pas-3, rps-17, rps-15, rpl-14, eif-3.E, hmg-1.2, rps-14, rpl-35, K12H4.5, rpl-21, pat-2, vha-1
GO.0006605..protein.targeting	0.00012264	0.0592907	emo-1, tomm-20
GO.0015450..P.P.bond.hydrolysis.driven.protein.transmembrane.transporter.activity	0.000405373	0.179648	emo-1, tomm-20
GO.0006915..apoptotic.process	0.000562318	0.230031	rpl-15, rps-28, rps-11, gst-5, rps-17, rps-15, eif-3.E, rpl-35, rpl-21, vha-1
GO.0018991..oviposition	0.000809152	0.307362	unc-62, elp-1, tni-1, ain-1, lin-28, unc-95, mlc-3, pat-2
GO.0018996..molting.cycle..collagen.and.cuticulin.based.cuticle	0.0015326	0.543359	emo-1, rpl-15, rps-28, rps-11, icd-2, rpl-14, rps-14
GO.0040011..locomotion	0.0018363	0.610339	unc-62, hsp-3, tni-1, ain-1, C06G1.1, ric-3, alp-1, ntl-2, hlh-1, iff-2, icd-2, pas-3, unc-95, tbx-2, mlc-3, ceh-13, pat-2
GO.0000028..ribosomal.small.subunit.assembly	0.00217408	0.680105	rps-17, rps-14
GO.0055120..striated.muscle.dense.body	0.00270077	0.797928	pfn-3, alp-1, unc-95, pat-2
GO.0019915..lipid.storage	0.00302039	0.803123	unc-62, ric-3, col-119, rps-11, ntl-2, phb-2, icd-2, T09B4.8, ztf-6
GO.0005743..mitochondrial.inner.membrane	0.00292471	0.803123	coq-3, phb-2, F58F12.1, C14B9.10
GO.0002181..cytoplasmic.translation	0.00355219	0.899549	rpl-15, rpl-29
GO.0048477..oogenesis	0.00654938	0.967488	unc-62, emo-1, phb-2, rps-17, eif-3.E
GO.0003677..DNA.binding	0.00499181	0.967488	unc-62, hil-7, his-62, hlh-1, lin-28, tbx-2, hmg-1.2, ceh-13, cec-1, mtss-1
GO.0006950..response.to.stress	0.00587327	0.967488	icd-2, epg-6
GO.0008425..2.polyprenyl.6.methoxy.1.4.benzoquinone.methyltransferase.activity	0.00644248	0.967488	coq-3
GO.0071806..protein.transmembrane.transport	0.00644248	0.967488	emo-1
GO.0045663..positive.regulation.of.myoblast.differentiation	0.00644248	0.967488	hlh-1
GO.0051146..striated.muscle.cell.differentiation	0.00644248	0.967488	hlh-1
GO.1901741..positive.regulation.of.myoblast.fusion	0.00644248	0.967488	hlh-1
GO.0070878..primary.miRNA.binding	0.00644248	0.967488	lin-28
GO.0070883..pre.miRNA.binding	0.00644248	0.967488	lin-28
GO.1990715..mRNA.CDS.binding	0.00644248	0.967488	lin-28
GO.2000635..negative.regulation.of.primary.miRNA.processing	0.00644248	0.967488	lin-28
GO.0000462..maturation.of.SSU.rRNA.from.tricistronic.rRNA.transcript..SSU.rRNA..5.8S.rRNA..LSU.rRNA.	0.00653687	0.967488	rps-24, rps-14
GO.0005862..muscle.thin.filament.tropomyosin	0.00644248	0.967488	tni-1
GO.0008453..alanine.glyoxylate.transaminase.activity	0.00644248	0.967488	T09B4.8
GO.0008340..determination.of.adult.lifespan	0.0127805	0.985935	sti-1, unc-62, sodh-1, ain-1, alp-1, rps-11, phb-2, gst-5, icd-2, rps-15, K12H4.5
GO.0005515..protein.binding	0.0113896	0.985935	sti-1, unc-62, sipa-1, tomm-20, cyn-3, ain-1, alp-1, ntl-2, icd-2, unc-95, hmg-1.2, epg-6
GO.0006898..receptor.mediated.endocytosis	0.0113096	0.985935	rps-18, ntl-2, iff-2, epg-2, pas-3, eif-3.E, hmg-1.2, K12H4.5, pat-2, vha-1
GO.0010171..body.morphogenesis	0.00888146	0.985935	unc-62, hsp-3, tni-1, hlh-1, phb-2, icd-2, rps-17, hmg-1.2, ceh-13
GO.0007275..multicellular.organism.development	0.00830424	0.985935	sti-1, unc-62, emo-1, hlh-1, lin-28, tbx-2, ceh-13
GO.0015078..hydrogen.ion.transmembrane.transporter.activity	0.00796099	0.985935	R04F11.2, vha-1
GO.0015986..ATP.synthesis.coupled.proton.transport	0.00723293	0.985935	R04F11.2, F58F12.1
GO.0061199..striated.muscle.contraction.involved.in.embryonic.body.morphogenesis	0.00872064	0.985935	hlh-1, pat-2
GO.0032880..regulation.of.protein.localization	0.0129777	0.985935	ain-1, tbx-2
GO.0019899..enzyme.binding	0.00951143	0.985935	lin-28, tbx-2
GO.0030728..ovulation	0.0129777	0.985935	emo-1, vha-1
GO.0031430..M.band	0.0129777	0.985935	unc-95, pat-2
GO.0000413..protein.peptidyl.prolyl.isomerization	0.0129777	0.985935	cyn-1, cyn-3
GO.0003755..peptidyl.prolyl.cis.trans.isomerase.activity	0.0129777	0.985935	cyn-1, cyn-3
GO.0001555..oocyte.growth	0.0128439	0.985935	emo-1
GO.0034663..endoplasmic.reticulum.chaperone.complex	0.0128439	0.985935	hsp-3
GO.0006452..translational.frameshifting	0.0128439	0.985935	iff-2
GO.0045901..positive.regulation.of.translational.elongation	0.0128439	0.985935	iff-2
GO.0045905..positive.regulation.of.translational.termination	0.0128439	0.985935	iff-2
GO.0007549..dosage.compensation	0.0128439	0.985935	lin-28
GO.0002082..regulation.of.oxidative.phosphorylation	0.0128439	0.985935	phb-2
GO.0035632..mitochondrial.prohibitin.complex	0.0128439	0.985935	phb-2
GO.0033130..acetylcholine.receptor.binding	0.0128439	0.985935	ric-3
GO.0022618..ribonucleoprotein.complex.assembly	0.0128439	0.985935	rpl-38
GO.0006407..rRNA.export.from.nucleus	0.0128439	0.985935	rps-28
GO.0046961..proton.transporting.ATPase.activity..rotational.mechanism	0.00723293	0.985935	F58F12.1, vha-1
GO.0007042..lysosomal.lumen.acidification	0.0128439	0.985935	vha-1
GO.0016031..tRNA.import.into.mitochondrion	0.0128439	0.985935	tomm-20
GO.0070096..mitochondrial.outer.membrane.translocase.complex.assembly	0.0128439	0.985935	tomm-20
GO.0003983..UTP.glucose.1.phosphate.uridylyltransferase.activity	0.0128439	0.985935	D1005.2
GO.0006011..UDP.glucose.metabolic.process	0.0128439	0.985935	D1005.2
GO.0010314..phosphatidylinositol.5.phosphate.binding	0.0128439	0.985935	epg-6
GO.0005750..mitochondrial.respiratory.chain.complex.III	0.0128439	0.985935	C14B9.10
GO.0000275..mitochondrial.proton.transporting.ATP.synthase.complex..catalytic.core.F.1.	0.0128439	0.985935	F58F12.1
GO.0005623..cell	0.0554353	1	emo-1, cyn-3
GO.0005942..phosphatidylinositol.3.kinase.complex	1	1	NA
GO.0008286..insulin.receptor.signaling.pathway	1	1	NA
GO.0016301..kinase.activity	1	1	NA
GO.0016310..phosphorylation	1	1	NA
GO.0019901..protein.kinase.binding	1	1	NA
GO.0035014..phosphatidylinositol.3.kinase.regulator.activity	1	1	NA
GO.0040024..dauer.larval.development	1	1	NA
GO.0043551..regulation.of.phosphatidylinositol.3.kinase.activity	1	1	NA
GO.0046854..phosphatidylinositol.phosphorylation	1	1	NA
GO.0046935..1.phosphatidylinositol.3.kinase.regulator.activity	1	1	NA
GO.0003333..amino.acid.transmembrane.transport	1	1	NA
GO.0005886..plasma.membrane	0.945841	1	lgc-34
GO.0015171..amino.acid.transmembrane.transporter.activity	1	1	NA
GO.0015179..L.amino.acid.transmembrane.transporter.activity	1	1	NA
GO.0015297..antiporter.activity	1	1	NA
GO.0015807..L.amino.acid.transport	1	1	NA
GO.0016020..membrane	0.959573	1	Y40B10A.9, emo-1, tomm-20, C05D9.7, F15G9.5, C03A3.1, ric-3, klp-11, col-119, col-130, lgc-34, phb-2, F58F12.1, C01G6.2, pat-2, vha-1
GO.0016021..integral.component.of.membrane	0.951967	1	Y40B10A.9, emo-1, tomm-20, C05D9.7, F15G9.5, C03A3.1, ric-3, klp-11, col-119, col-130, lgc-34, phb-2, C01G6.2, pat-2, vha-1
GO.1902475..L.alpha.amino.acid.transmembrane.transport	1	1	NA
GO.1990184..amino.acid.transport.complex	1	1	NA
GO.0008406..gonad.development	0.0192015	1	hsp-3, rps-28, phb-2, icd-2, hmg-1.2, rpl-21
GO.0009986..cell.surface	0.127006	1	pat-2
GO.0000278..mitotic.cell.cycle	1	1	NA
GO.0040025..vulval.development	0.0317614	1	ain-1, lin-28, hmg-1.2
GO.0040026..positive.regulation.of.vulval.development	0.33508	1	hmg-1.2
GO.0040035..hermaphrodite.genitalia.development	0.0135434	1	unc-62, rpl-38, his-62, ntl-2, iff-2, icd-2, pas-3, eif-3.E, hmg-1.2, K12H4.5
GO.0005576..extracellular.region	1	1	NA
GO.0098542..defense.response.to.other.organism	1	1	NA
GO.0003674..molecular_function	0.634809	1	rps-14
GO.0006952..defense.response	1	1	NA
GO.0031640..killing.of.cells.of.other.organism	1	1	NA
GO.0042742..defense.response.to.bacterium	1	1	NA
GO.0050829..defense.response.to.Gram.negative.bacterium	1	1	NA
GO.0050830..defense.response.to.Gram.positive.bacterium	1	1	NA
GO.0050832..defense.response.to.fungus	1	1	NA
GO.0000077..DNA.damage.checkpoint	1	1	NA
GO.0000166..nucleotide.binding	0.936755	1	hsp-3, rps-24, klp-11
GO.0004672..protein.kinase.activity	1	1	NA
GO.0004713..protein.tyrosine.kinase.activity	1	1	NA
GO.0004715..non.membrane.spanning.protein.tyrosine.kinase.activity	1	1	NA
GO.0005102..receptor.binding	1	1	NA
GO.0005524..ATP.binding	0.960179	1	hsp-3, klp-11
GO.0005737..cytoplasm	0.0328223	1	sti-1, Y57E12AL.6, elp-1, pfn-3, ain-1, iff-2, epg-2, pas-3, lin-28, eif-3.E, tbx-2, ceh-13, epg-6
GO.0006468..protein.phosphorylation	1	1	NA
GO.0007169..transmembrane.receptor.protein.tyrosine.kinase.signaling.pathway	1	1	NA
GO.0007283..spermatogenesis	0.247851	1	phb-2
GO.0010212..response.to.ionizing.radiation	1	1	NA
GO.0016740..transferase.activity	0.989238	1	gst-5
GO.0030154..cell.differentiation	0.256527	1	emo-1, hlh-1
GO.0030336..negative.regulation.of.cell.migration	1	1	NA
GO.0031234..extrinsic.component.of.cytoplasmic.side.of.plasma.membrane	1	1	NA
GO.0038083..peptidyl.tyrosine.autophosphorylation	1	1	NA
GO.0042127..regulation.of.cell.proliferation	1	1	NA
GO.0043066..negative.regulation.of.apoptotic.process	1	1	NA
GO.0043518..negative.regulation.of.DNA.damage.response..signal.transduction.by.p53.class.mediator	1	1	NA
GO.0045087..innate.immune.response	0.797577	1	gst-5
GO.1901075..negative.regulation.of.engulfment.of.apoptotic.cell	1	1	NA
GO.0005215..transporter.activity	1	1	NA
GO.0006810..transport	0.282756	1	emo-1, tomm-20, lgc-34, F58F12.1, icd-2, vha-1
GO.0006869..lipid.transport	1	1	NA
GO.0008152..metabolic.process	0.858464	1	D1005.2, klp-11, gst-5, T09B4.8
GO.0016246..RNA.interference	0.599839	1	K12H4.5
GO.0016887..ATPase.activity	0.129323	1	hsp-3, klp-11
GO.0042626..ATPase.activity..coupled.to.transmembrane.movement.of.substances	1	1	NA
GO.0043231..intracellular.membrane.bounded.organelle	0.483993	1	ric-3
GO.0055085..transmembrane.transport	1	1	NA
GO.0040020..regulation.of.meiotic.nuclear.division	1	1	NA
GO.0030176..integral.component.of.endoplasmic.reticulum.membrane	1	1	NA
GO.0030968..endoplasmic.reticulum.unfolded.protein.response	0.0442126	1	hsp-3, phb-2
GO.0060465..pharynx.development	1	1	NA
GO.0001507..acetylcholine.catabolic.process.in.synaptic.cleft	1	1	NA
GO.0003990..acetylcholinesterase.activity	1	1	NA
GO.0004104..cholinesterase.activity	1	1	NA
GO.0005615..extracellular.space	1	1	NA
GO.0006581..acetylcholine.catabolic.process	1	1	NA
GO.0016787..hydrolase.activity	0.988403	1	pas-3
GO.0030054..cell.junction	1	1	NA
GO.0040012..regulation.of.locomotion	1	1	NA
GO.0042135..neurotransmitter.catabolic.process	1	1	NA
GO.0042802..identical.protein.binding	0.322004	1	T09B4.8
GO.0043083..synaptic.cleft	1	1	NA
GO.0045202..synapse	1	1	NA
GO.0052689..carboxylic.ester.hydrolase.activity	1	1	NA
GO.0007271..synaptic.transmission..cholinergic	0.0537759	1	ric-3, lgc-34
GO.0042803..protein.homodimerization.activity	0.242959	1	hlh-1
GO.0035188..hatching	1	1	NA
GO.0043058..regulation.of.backward.locomotion	1	1	NA
GO.0046983..protein.dimerization.activity	0.23308	1	hlh-1
GO.0050879..multicellular.organismal.movement	1	1	NA
GO.0006508..proteolysis	0.855355	1	pas-3
GO.0008237..metallopeptidase.activity	1	1	NA
GO.0008241..peptidyl.dipeptidase.activity	1	1	NA
GO.0040018..positive.regulation.of.multicellular.organism.growth	0.0179465	1	rpl-15, ntl-2, phb-2, rps-17, hmg-1.2, ceh-13
GO.0003723..RNA.binding	0.104704	1	rpl-38, rps-4, rps-18, iff-2
GO.0003994..aconitate.hydratase.activity	1	1	NA
GO.0005829..cytosol	0.666753	1	epg-6
GO.0006099..tricarboxylic.acid.cycle	1	1	NA
GO.0006879..cellular.iron.ion.homeostasis	1	1	NA
GO.0016829..lyase.activity	1	1	NA
GO.0046872..metal.ion.binding	0.878494	1	sodh-1, tni-1, alp-1, lin-28, unc-95
GO.0051536..iron.sulfur.cluster.binding	1	1	NA
GO.0051539..4.iron..4.sulfur.cluster.binding	1	1	NA
GO.0072350..tricarboxylic.acid.metabolic.process	1	1	NA
GO.0005739..mitochondrion	0.030394	1	tomm-20, cyn-1, phb-2, F58F12.1, T09B4.8, mtss-1
GO.0004889..acetylcholine.activated.cation.selective.channel.activity	0.207822	1	lgc-34
GO.0005216..ion.channel.activity	1	1	NA
GO.0005230..extracellular.ligand.gated.ion.channel.activity	0.347906	1	lgc-34
GO.0005231..excitatory.extracellular.ligand.gated.ion.channel.activity	1	1	NA
GO.0005892..acetylcholine.gated.channel.complex	0.207822	1	lgc-34
GO.0006811..ion.transport	0.27669	1	lgc-34, F58F12.1, vha-1
GO.0007274..neuromuscular.synaptic.transmission	1	1	NA
GO.0015464..acetylcholine.receptor.activity	0.192274	1	lgc-34
GO.0035094..response.to.nicotine	1	1	NA
GO.0042166..acetylcholine.binding	0.207822	1	lgc-34
GO.0043005..neuron.projection	0.347906	1	ric-3
GO.0045211..postsynaptic.membrane	1	1	NA
GO.0051932..synaptic.transmission..GABAergic	1	1	NA
GO.0098655..cation.transmembrane.transport	0.343658	1	lgc-34
GO.0098662..inorganic.cation.transmembrane.transport	1	1	NA
GO.0098703..calcium.ion.import.across.plasma.membrane	1	1	NA
GO.0034220..ion.transmembrane.transport	0.477231	1	lgc-34
GO.0007268..chemical.synaptic.transmission	1	1	NA
GO.0042995..cell.projection	1	1	NA
GO.0000281..mitotic.cytokinesis	1	1	NA
GO.0000910..cytokinesis	1	1	NA
GO.0005200..structural.constituent.of.cytoskeleton	1	1	NA
GO.0005856..cytoskeleton	0.244587	1	elp-1, pfn-3
GO.0007517..muscle.organ.development	0.0982953	1	hlh-1
GO.0030036..actin.cytoskeleton.organization	1	1	NA
GO.0030866..cortical.actin.cytoskeleton.organization	1	1	NA
GO.0040007..growth	0.0190033	1	ntl-2, epg-2, K12H4.5, epg-6
GO.0040039..inductive.cell.migration	0.216065	1	icd-2, pat-2
GO.0071688..striated.muscle.myosin.thick.filament.assembly	0.0575384	1	C33D9.13, unc-95, pat-2
GO.0005884..actin.filament	1	1	NA
GO.0005938..cell.cortex	0.4046	1	pfn-3
GO.0007111..meiosis.II.cytokinesis	1	1	NA
GO.0005865..striated.muscle.thin.filament	1	1	NA
GO.0045121..membrane.raft	0.281232	1	vha-1
GO.0030033..microvillus.assembly	1	1	NA
GO.0035148..tube.formation	1	1	NA
GO.0097516..microvillar.actin.bundle	1	1	NA
GO.1990357..terminal.web	1	1	NA
GO.0004016..adenylate.cyclase.activity	1	1	NA
GO.0006171..cAMP.biosynthetic.process	1	1	NA
GO.0006935..chemotaxis	1	1	NA
GO.0007188..adenylate.cyclase.modulating.G.protein.coupled.receptor.signaling.pathway	1	1	NA
GO.0007189..adenylate.cyclase.activating.G.protein.coupled.receptor.signaling.pathway	1	1	NA
GO.0007193..adenylate.cyclase.inhibiting.G.protein.coupled.receptor.signaling.pathway	1	1	NA
GO.0007614..short.term.memory	1	1	NA
GO.0008219..cell.death	1	1	NA
GO.0009190..cyclic.nucleotide.biosynthetic.process	1	1	NA
GO.0016849..phosphorus.oxygen.lyase.activity	1	1	NA
GO.0019933..cAMP.mediated.signaling	1	1	NA
GO.0030431..sleep	1	1	NA
GO.0035556..intracellular.signal.transduction	1	1	NA
GO.0040013..negative.regulation.of.locomotion	1	1	NA
GO.0040017..positive.regulation.of.locomotion	0.202673	1	pat-2
GO.0072375..medium.term.memory	1	1	NA
GO.0004383..guanylate.cyclase.activity	1	1	NA
GO.0006182..cGMP.biosynthetic.process	1	1	NA
GO.0007165..signal.transduction	1	1	NA
GO.0008294..calcium..and.calmodulin.responsive.adenylate.cyclase.activity	1	1	NA
GO.0090038..negative.regulation.of.protein.kinase.C.signaling	1	1	NA
GO.2000114..regulation.of.establishment.of.cell.polarity	1	1	NA
GO.0007186..G.protein.coupled.receptor.signaling.pathway	1	1	NA
GO.1900195..positive.regulation.of.oocyte.maturation	1	1	NA
GO.0003779..actin.binding	0.0675372	1	pfn-3, tni-1
GO.0007613..memory	1	1	NA
GO.0007616..long.term.memory	1	1	NA
GO.0014069..postsynaptic.density	1	1	NA
GO.0051015..actin.filament.binding	1	1	NA
GO.0051016..barbed.end.actin.filament.capping	1	1	NA
GO.0097120..receptor.localization.to.synapse	1	1	NA
GO.2000249..regulation.of.actin.cytoskeleton.reorganization	1	1	NA
GO.0004222..metalloendopeptidase.activity	1	1	NA
GO.0007229..integrin.mediated.signaling.pathway	0.0504047	1	pat-2
GO.0008233..peptidase.activity	0.699887	1	pas-3
GO.0022401..negative.adaptation.of.signaling.pathway	1	1	NA
GO.0046959..habituation	1	1	NA
GO.0004000..adenosine.deaminase.activity	1	1	NA
GO.0005634..nucleus	0.061677	1	tag-304, unc-62, Y57E12AL.6, jmjd-3.1, ntl-2, hlh-1, pas-3, eif-3.E, unc-95, tbx-2, hmg-1.2, ceh-13, cec-1, ZK1010.10
GO.0006382..adenosine.to.inosine.editing	1	1	NA
GO.0006396..RNA.processing	1	1	NA
GO.0022626..cytosolic.ribosome	1	1	NA
GO.0006397..mRNA.processing	1	1	NA
GO.0003824..catalytic.activity	0.890428	1	T09B4.8
GO.0005777..peroxisome	1	1	NA
GO.0006629..lipid.metabolic.process	1	1	NA
GO.0008609..alkylglycerone.phosphate.synthase.activity	1	1	NA
GO.0008610..lipid.biosynthetic.process	1	1	NA
GO.0008611..ether.lipid.biosynthetic.process	1	1	NA
GO.0016491..oxidoreductase.activity	0.932964	1	sodh-1
GO.0016614..oxidoreductase.activity..acting.on.CH.OH.group.of.donors	1	1	NA
GO.0050660..flavin.adenine.dinucleotide.binding	1	1	NA
GO.0055114..oxidation.reduction.process	0.962758	1	sodh-1
GO.0071949..FAD.binding	1	1	NA
GO.0008270..zinc.ion.binding	0.333907	1	sodh-1, alp-1, lin-28, unc-95, ZK1010.10
GO.0008361..regulation.of.cell.size	1	1	NA
GO.0030199..collagen.fibril.organization	1	1	NA
GO.0043652..engulfment.of.apoptotic.cell	1	1	NA
GO.0004871..signal.transducer.activity	1	1	NA
GO.0014057..positive.regulation.of.acetylcholine.secretion..neurotransmission	1	1	NA
GO.0016079..synaptic.vesicle.exocytosis	1	1	NA
GO.0030163..protein.catabolic.process	0.213701	1	unc-62, pat-2
GO.0030421..defecation	0.252712	1	phb-2
GO.0035418..protein.localization.to.synapse	1	1	NA
GO.0060179..male.mating.behavior	1	1	NA
GO.0004930..G.protein.coupled.receptor.activity	1	1	NA
GO.0007218..neuropeptide.signaling.pathway	1	1	NA
GO.0008188..neuropeptide.receptor.activity	1	1	NA
GO.2000294..positive.regulation.of.defecation	1	1	NA
GO.0005085..guanyl.nucleotide.exchange.factor.activity	1	1	NA
GO.0007618..mating	1	1	NA
GO.0017112..Rab.guanyl.nucleotide.exchange.factor.activity	1	1	NA
GO.0043547..positive.regulation.of.GTPase.activity	0.456414	1	sipa-1
GO.0004252..serine.type.endopeptidase.activity	1	1	NA
GO.0003924..GTPase.activity	1	1	NA
GO.0005525..GTP.binding	1	1	NA
GO.0006886..intracellular.protein.transport	0.138036	1	emo-1, tomm-20
GO.0006913..nucleocytoplasmic.transport	1	1	NA
GO.0007264..small.GTPase.mediated.signal.transduction	1	1	NA
GO.0008021..synaptic.vesicle	1	1	NA
GO.0015031..protein.transport	0.117022	1	emo-1, tomm-20, icd-2
GO.0030141..secretory.granule	1	1	NA
GO.0032402..melanosome.transport	1	1	NA
GO.0042470..melanosome	1	1	NA
GO.0045921..positive.regulation.of.exocytosis	1	1	NA
GO.0090522..vesicle.tethering.involved.in.exocytosis	1	1	NA
GO.1903364..positive.regulation.of.cellular.protein.catabolic.process	1	1	NA
GO.1990504..dense.core.granule.exocytosis	1	1	NA
GO.0002250..adaptive.immune.response	1	1	NA
GO.0006954..inflammatory.response	1	1	NA
GO.0006979..response.to.oxidative.stress	0.276554	1	phb-2
GO.0007568..aging	1	1	NA
GO.0007611..learning.or.memory	1	1	NA
GO.0014065..phosphatidylinositol.3.kinase.signaling	1	1	NA
GO.0016303..1.phosphatidylinositol.3.kinase.activity	1	1	NA
GO.0016773..phosphotransferase.activity..alcohol.group.as.acceptor	1	1	NA
GO.0030168..platelet.activation	1	1	NA
GO.0031513..nonmotile.primary.cilium	1	1	NA
GO.0035005..1.phosphatidylinositol.4.phosphate.3.kinase.activity	1	1	NA
GO.0036092..phosphatidylinositol.3.phosphate.biosynthetic.process	1	1	NA
GO.0043053..dauer.entry	1	1	NA
GO.0046686..response.to.cadmium.ion	1	1	NA
GO.0048015..phosphatidylinositol.mediated.signaling	1	1	NA
GO.0050919..negative.chemotaxis	1	1	NA
GO.0050920..regulation.of.chemotaxis	1	1	NA
GO.0060326..cell.chemotaxis	1	1	NA
GO.1901047..insulin.receptor.signaling.pathway.involved.in.determination.of.adult.lifespan	1	1	NA
GO.0001965..G.protein.alpha.subunit.binding	1	1	NA
GO.0005096..GTPase.activator.activity	0.257542	1	sipa-1
GO.0030695..GTPase.regulator.activity	1	1	NA
GO.0050790..regulation.of.catalytic.activity	1	1	NA
GO.0060259..regulation.of.feeding.behavior	1	1	NA
GO.0003684..damaged.DNA.binding	1	1	NA
GO.0003908..methylated.DNA..protein..cysteine.S.methyltransferase.activity	1	1	NA
GO.0006281..DNA.repair	1	1	NA
GO.0006307..DNA.dealkylation.involved.in.DNA.repair	1	1	NA
GO.0016765..transferase.activity..transferring.alkyl.or.aryl..other.than.methyl..groups	1	1	NA
GO.0032259..methylation	0.423643	1	coq-3
GO.0001085..RNA.polymerase.II.transcription.factor.binding	1	1	NA
GO.0001708..cell.fate.specification	0.0396978	1	lin-28, hmg-1.2
GO.0003700..transcription.factor.activity..sequence.specific.DNA.binding	0.386008	1	hlh-1, tbx-2, ceh-13
GO.0005667..transcription.factor.complex	0.171073	1	tbx-2
GO.0006351..transcription..DNA.templated	0.790085	1	hlh-1, tbx-2
GO.0006355..regulation.of.transcription..DNA.templated	0.0651814	1	unc-62, ntl-2, hlh-1, lin-28, W04A4.6, tbx-2, ZK1010.10
GO.0006366..transcription.from.RNA.polymerase.II.promoter	0.276554	1	hlh-1
GO.0009410..response.to.xenobiotic.stimulus	1	1	NA
GO.0022008..neurogenesis	1	1	NA
GO.0030522..intracellular.receptor.signaling.pathway	1	1	NA
GO.0035176..social.behavior	1	1	NA
GO.0043565..sequence.specific.DNA.binding	1	1	NA
GO.0045944..positive.regulation.of.transcription.from.RNA.polymerase.II.promoter	0.208982	1	hlh-1, hmg-1.2
GO.0090575..RNA.polymerase.II.transcription.factor.complex	1	1	NA
GO.0004874..aryl.hydrocarbon.receptor.activity	1	1	NA
GO.0007399..nervous.system.development	1	1	NA
GO.0007416..synapse.assembly	1	1	NA
GO.0007610..behavior	1	1	NA
GO.0034753..nuclear.aryl.hydrocarbon.receptor.complex	1	1	NA
GO.0046685..response.to.arsenic.containing.substance	1	1	NA
GO.0071218..cellular.response.to.misfolded.protein	1	1	NA
GO.0000235..astral.microtubule	1	1	NA
GO.0000780..condensed.nuclear.chromosome..centromeric.region	1	1	NA
GO.0000794..condensed.nuclear.chromosome	1	1	NA
GO.0005813..centrosome	1	1	NA
GO.0005828..kinetochore.microtubule	1	1	NA
GO.0007020..microtubule.nucleation	1	1	NA
GO.0007049..cell.cycle	1	1	NA
GO.0031616..spindle.pole.centrosome	1	1	NA
GO.0032133..chromosome.passenger.complex	1	1	NA
GO.0032465..regulation.of.cytokinesis	1	1	NA
GO.0035174..histone.serine.kinase.activity	1	1	NA
GO.0035404..histone.serine.phosphorylation	1	1	NA
GO.0040002..collagen.and.cuticulin.based.cuticle.development	1	1	NA
GO.0051233..spindle.midzone	1	1	NA
GO.0090307..mitotic.spindle.assembly	1	1	NA
GO.1904781..positive.regulation.of.protein.localization.to.centrosome	1	1	NA
GO.0000793..condensed.chromosome	1	1	NA
GO.0004674..protein.serine.threonine.kinase.activity	1	1	NA
GO.0005694..chromosome	0.39681	1	cec-1
GO.0005819..spindle	1	1	NA
GO.0005876..spindle.microtubule	1	1	NA
GO.0007059..chromosome.segregation	1	1	NA
GO.0007067..mitotic.nuclear.division	0.470381	1	C33D9.13
GO.0007126..meiotic.nuclear.division	1	1	NA
GO.0007281..germ.cell.development	0.30429	1	hsp-3, rps-28
GO.0016568..chromatin.modification	1	1	NA
GO.0018105..peptidyl.serine.phosphorylation	1	1	NA
GO.0018107..peptidyl.threonine.phosphorylation	1	1	NA
GO.0019894..kinesin.binding	1	1	NA
GO.0030261..chromosome.condensation	1	1	NA
GO.0030496..midbody	1	1	NA
GO.0031991..regulation.of.actomyosin.contractile.ring.contraction	1	1	NA
GO.0045184..establishment.of.protein.localization	1	1	NA
GO.0046777..protein.autophosphorylation	1	1	NA
GO.0051117..ATPase.binding	1	1	NA
GO.0051256..mitotic.spindle.midzone.assembly	1	1	NA
GO.0051301..cell.division	1	1	NA
GO.0051321..meiotic.cell.cycle	1	1	NA
GO.0005913..cell.cell.adherens.junction	1	1	NA
GO.0008092..cytoskeletal.protein.binding	1	1	NA
GO.0016327..apicolateral.plasma.membrane	1	1	NA
GO.0040027..negative.regulation.of.vulval.development	0.735024	1	hmg-1.2
GO.0043296..apical.junction.complex	1	1	NA
GO.0044292..dendrite.terminus	1	1	NA
GO.0045216..cell.cell.junction.organization	1	1	NA
GO.0032266..phosphatidylinositol.3.phosphate.binding	0.080623	1	epg-6
GO.0002376..immune.system.process	1	1	NA
GO.0005516..calmodulin.binding	1	1	NA
GO.0042771..intrinsic.apoptotic.signaling.pathway.in.response.to.DNA.damage.by.p53.class.mediator	1	1	NA
GO.0043025..neuronal.cell.body	0.171739	1	elp-1, ric-3
GO.0000932..cytoplasmic.mRNA.processing.body	0.0169092	1	ain-1, ntl-2
GO.0003676..nucleic.acid.binding	0.466673	1	rps-18, lin-28, ztf-6
GO.0003725..double.stranded.RNA.binding	1	1	NA
GO.0003727..single.stranded.RNA.binding	1	1	NA
GO.0016892..endoribonuclease.activity..producing.3.phosphomonoesters	1	1	NA
GO.0035068..micro.ribonucleoprotein.complex	1	1	NA
GO.0035196..production.of.miRNAs.involved.in.gene.silencing.by.miRNA	1	1	NA
GO.0035198..miRNA.binding	1	1	NA
GO.0035279..mRNA.cleavage.involved.in.gene.silencing.by.miRNA	1	1	NA
GO.0070551..endoribonuclease.activity..cleaving.siRNA.paired.mRNA	1	1	NA
GO.0070922..small.RNA.loading.onto.RISC	1	1	NA
GO.0090502..RNA.phosphodiester.bond.hydrolysis..endonucleolytic	1	1	NA
GO.0004029..aldehyde.dehydrogenase..NAD..activity	1	1	NA
GO.0016620..oxidoreductase.activity..acting.on.the.aldehyde.or.oxo.group.of.donors..NAD.or.NADP.as.acceptor	1	1	NA
GO.0048871..multicellular.organismal.homeostasis	1	1	NA
GO.0006730..one.carbon.metabolic.process	1	1	NA
GO.0009058..biosynthetic.process	1	1	NA
GO.0009258..10.formyltetrahydrofolate.catabolic.process	1	1	NA
GO.0016155..formyltetrahydrofolate.dehydrogenase.activity	1	1	NA
GO.0016742..hydroxymethyl...formyl..and.related.transferase.activity	1	1	NA
GO.0019145..aminobutyraldehyde.dehydrogenase.activity	1	1	NA
GO.0047105..4.trimethylammoniobutyraldehyde.dehydrogenase.activity	1	1	NA
GO.0004028..3.chloroallyl.aldehyde.dehydrogenase.activity	1	1	NA
GO.0004030..aldehyde.dehydrogenase..NAD.P....activity	1	1	NA
GO.0006081..cellular.aldehyde.metabolic.process	1	1	NA
GO.0003842..1.pyrroline.5.carboxylate.dehydrogenase.activity	1	1	NA
GO.0006537..glutamate.biosynthetic.process	1	1	NA
GO.0006561..proline.biosynthetic.process	1	1	NA
GO.0032502..developmental.process	0.160267	1	unc-62
GO.0004777..succinate.semialdehyde.dehydrogenase..NAD...activity	1	1	NA
GO.0009013..succinate.semialdehyde.dehydrogenase..NAD.P....activity	1	1	NA
GO.0000062..fatty.acyl.CoA.binding	1	1	NA
GO.0004491..methylmalonate.semialdehyde.dehydrogenase..acylating..activity	1	1	NA
GO.0006573..valine.metabolic.process	1	1	NA
GO.0018478..malonate.semialdehyde.dehydrogenase..acetylating..activity	1	1	NA
GO.0019859..thymine.metabolic.process	1	1	NA
GO.0005575..cellular_component	0.144655	1	gst-5, rps-14
GO.0001055..RNA.polymerase.II.activity	1	1	NA
GO.0003899..DNA.directed.RNA.polymerase.activity	1	1	NA
GO.0005665..DNA.directed.RNA.polymerase.II..core.complex	1	1	NA
GO.0006479..protein.methylation	1	1	NA
GO.0007052..mitotic.spindle.organization	0.330749	1	epg-2
GO.0007369..gastrulation	1	1	NA
GO.0008356..asymmetric.cell.division	1	1	NA
GO.0010458..exit.from.mitosis	1	1	NA
GO.0016779..nucleotidyltransferase.activity	1	1	NA
GO.0042789..mRNA.transcription.from.RNA.polymerase.II.promoter	1	1	NA
GO.0005887..integral.component.of.plasma.membrane	1	1	NA
GO.0006995..cellular.response.to.nitrogen.starvation	1	1	NA
GO.0008519..ammonium.transmembrane.transporter.activity	1	1	NA
GO.0015695..organic.cation.transport	1	1	NA
GO.0015696..ammonium.transport	1	1	NA
GO.0019740..nitrogen.utilization	1	1	NA
GO.0072488..ammonium.transmembrane.transport	1	1	NA
GO.0034648..histone.demethylase.activity..H3.dimethyl.K4.specific.	1	1	NA
GO.0034720..histone.H3.K4.demethylation	1	1	NA
GO.0005635..nuclear.envelope	1	1	NA
GO.0005640..nuclear.outer.membrane	1	1	NA
GO.0007010..cytoskeleton.organization	1	1	NA
GO.0035046..pronuclear.migration	1	1	NA
GO.0051087..chaperone.binding	1	1	NA
GO.0051179..localization	1	1	NA
GO.0002143..tRNA.wobble.position.uridine.thiolation	1	1	NA
GO.0004792..thiosulfate.sulfurtransferase.activity	1	1	NA
GO.0008641..small.protein.activating.enzyme.activity	1	1	NA
GO.0016874..ligase.activity	1	1	NA
GO.0016925..protein.sumoylation	1	1	NA
GO.0018117..protein.adenylylation	1	1	NA
GO.0019948..SUMO.activating.enzyme.activity	1	1	NA
GO.0031510..SUMO.activating.enzyme.complex	1	1	NA
GO.0032447..protein.urmylation	1	1	NA
GO.0042292..URM1.activating.enzyme.activity	1	1	NA
GO.0070733..protein.adenylyltransferase.activity	1	1	NA
GO.0005680..anaphase.promoting.complex	1	1	NA
GO.0006511..ubiquitin.dependent.protein.catabolic.process	0.299644	1	pas-3
GO.0031625..ubiquitin.protein.ligase.binding	1	1	NA
GO.0042787..protein.ubiquitination.involved.in.ubiquitin.dependent.protein.catabolic.process	1	1	NA
GO.0061630..ubiquitin.protein.ligase.activity	1	1	NA
GO.0004842..ubiquitin.protein.transferase.activity	1	1	NA
GO.0008054..negative.regulation.of.cyclin.dependent.protein.serine.threonine.kinase.by.cyclin.degradation	1	1	NA
GO.0045132..meiotic.chromosome.segregation	0.549975	1	icd-2
GO.0045842..positive.regulation.of.mitotic.metaphase.anaphase.transition	1	1	NA
GO.0097602..cullin.family.protein.binding	1	1	NA
GO.0002039..p53.binding	1	1	NA
GO.0007219..Notch.signaling.pathway	1	1	NA
GO.0016485..protein.processing	1	1	NA
GO.0034394..protein.localization.to.cell.surface	0.0192045	1	ric-3
GO.0043085..positive.regulation.of.catalytic.activity	1	1	NA
GO.0045165..cell.fate.commitment	1	1	NA
GO.0048598..embryonic.morphogenesis	1	1	NA
GO.0048599..oocyte.development	1	1	NA
GO.0060581..cell.fate.commitment.involved.in.pattern.specification	1	1	NA
GO.0070765..gamma.secretase.complex	1	1	NA
GO.0005768..endosome	1	1	NA
GO.0005769..early.endosome	1	1	NA
GO.0008201..heparin.binding	1	1	NA
GO.0031410..cytoplasmic.vesicle	1	1	NA
GO.0042395..ecdysis..collagen.and.cuticulin.based.cuticle	1	1	NA
GO.0046914..transition.metal.ion.binding	1	1	NA
GO.0009306..protein.secretion	0.115632	1	tomm-20
GO.0016192..vesicle.mediated.transport	1	1	NA
GO.0030131..clathrin.adaptor.complex	1	1	NA
GO.0045176..apical.protein.localization	1	1	NA
GO.0003906..DNA..apurinic.or.apyrimidinic.site..lyase.activity	1	1	NA
GO.0006284..base.excision.repair	1	1	NA
GO.0006974..cellular.response.to.DNA.damage.stimulus	1	1	NA
GO.0008081..phosphoric.diester.hydrolase.activity	1	1	NA
GO.0008311..double.stranded.DNA.3.5.exodeoxyribonuclease.activity	1	1	NA
GO.0017005..3.tyrosyl.DNA.phosphodiesterase.activity	1	1	NA
GO.0090305..nucleic.acid.phosphodiester.bond.hydrolysis	1	1	NA
GO.0004177..aminopeptidase.activity	1	1	NA
GO.0001714..endodermal.cell.fate.specification	1	1	NA
GO.0005881..cytoplasmic.microtubule	1	1	NA
GO.0005912..adherens.junction	1	1	NA
GO.0007026..negative.regulation.of.microtubule.depolymerization	1	1	NA
GO.0007389..pattern.specification.process	1	1	NA
GO.0007492..endoderm.development	1	1	NA
GO.0008013..beta.catenin.binding	1	1	NA
GO.0008283..cell.proliferation	1	1	NA
GO.0016055..Wnt.signaling.pathway	0.23308	1	hmg-1.2
GO.0016476..regulation.of.embryonic.cell.shape	1	1	NA
GO.0016477..cell.migration	0.192563	1	unc-62, rpl-21
GO.0030177..positive.regulation.of.Wnt.signaling.pathway	1	1	NA
GO.0030178..negative.regulation.of.Wnt.signaling.pathway	1	1	NA
GO.0030334..regulation.of.cell.migration	1	1	NA
GO.0030877..beta.catenin.destruction.complex	1	1	NA
GO.0035414..negative.regulation.of.catenin.import.into.nucleus	1	1	NA
GO.0045295..gamma.catenin.binding	1	1	NA
GO.0045595..regulation.of.cell.differentiation	1	1	NA
GO.0045732..positive.regulation.of.protein.catabolic.process	1	1	NA
GO.0047485..protein.N.terminus.binding	1	1	NA
GO.0048666..neuron.development	0.127006	1	tbx-2
GO.0051782..negative.regulation.of.cell.division	1	1	NA
GO.0090090..negative.regulation.of.canonical.Wnt.signaling.pathway	1	1	NA
GO.0008565..protein.transporter.activity	1	1	NA
GO.0030276..clathrin.binding	1	1	NA
GO.0005794..Golgi.apparatus	1	1	NA
GO.0030117..membrane.coat	1	1	NA
GO.0030121..AP.1.adaptor.complex	1	1	NA
GO.0030119..AP.type.membrane.coat.adaptor.complex	1	1	NA
GO.0008022..protein.C.terminus.binding	1	1	NA
GO.0008104..protein.localization	1	1	NA
GO.0030139..endocytic.vesicle	1	1	NA
GO.0032794..GTPase.activating.protein.binding	1	1	NA
GO.0036062..presynaptic.periactive.zone	1	1	NA
GO.0045334..clathrin.coated.endocytic.vesicle	1	1	NA
GO.0007040..lysosome.organization	1	1	NA
GO.0030123..AP.3.adaptor.complex	1	1	NA
GO.0007154..cell.communication	1	1	NA
GO.0008595..anterior.posterior.axis.specification..embryo	1	1	NA
GO.0009880..embryonic.pattern.specification	1	1	NA
GO.0016331..morphogenesis.of.embryonic.epithelium	1	1	NA
GO.0040028..regulation.of.vulval.development	1	1	NA
GO.0046331..lateral.inhibition	1	1	NA
GO.0006833..water.transport	1	1	NA
GO.0015204..urea.transmembrane.transporter.activity	1	1	NA
GO.0015250..water.channel.activity	1	1	NA
GO.0015254..glycerol.channel.activity	1	1	NA
GO.0015793..glycerol.transport	1	1	NA
GO.0016323..basolateral.plasma.membrane	1	1	NA
GO.0022838..substrate.specific.channel.activity	1	1	NA
GO.0071918..urea.transmembrane.transport	1	1	NA
GO.0016324..apical.plasma.membrane	1	1	NA
GO.0008150..biological_process	1	1	NA
GO.0016567..protein.ubiquitination	1	1	NA
GO.0005783..endoplasmic.reticulum	0.124045	1	emo-1, hsp-3, ric-3
GO.0007005..mitochondrion.organization	1	1	NA
GO.0007276..gamete.generation	0.473817	1	iff-2
GO.0048259..regulation.of.receptor.mediated.endocytosis	1	1	NA
GO.1904748..regulation.of.apoptotic.process.involved.in.development	1	1	NA
GO.0032940..secretion.by.cell	0.368742	1	pat-2
GO.0012505..endomembrane.system	1	1	NA
GO.0042059..negative.regulation.of.epidermal.growth.factor.receptor.signaling.pathway	1	1	NA
GO.0000226..microtubule.cytoskeleton.organization	1	1	NA
GO.0005764..lysosome	1	1	NA
GO.0008088..axo.dendritic.transport	1	1	NA
GO.0008333..endosome.to.lysosome.transport	1	1	NA
GO.0048786..presynaptic.active.zone	1	1	NA
GO.0005930..axoneme	1	1	NA
GO.0030425..dendrite	0.262341	1	elp-1
GO.0046907..intracellular.transport	1	1	NA
GO.0032501..multicellular.organismal.process	1	1	NA
GO.0040010..positive.regulation.of.growth.rate	1	1	NA
GO.0050896..response.to.stimulus	1	1	NA
GO.0000049..tRNA.binding	1	1	NA
GO.0004812..aminoacyl.tRNA.ligase.activity	1	1	NA
GO.0004813..alanine.tRNA.ligase.activity	1	1	NA
GO.0006400..tRNA.modification	1	1	NA
GO.0006419..alanyl.tRNA.aminoacylation	1	1	NA
GO.0016597..amino.acid.binding	1	1	NA
GO.0016876..ligase.activity..forming.aminoacyl.tRNA.and.related.compounds	1	1	NA
GO.0043039..tRNA.aminoacylation	1	1	NA
GO.0005789..endoplasmic.reticulum.membrane	0.153581	1	emo-1, ric-3
GO.0006631..fatty.acid.metabolic.process	1	1	NA
GO.0006633..fatty.acid.biosynthetic.process	1	1	NA
GO.0016627..oxidoreductase.activity..acting.on.the.CH.CH.group.of.donors	1	1	NA
GO.0005885..Arp2.3.protein.complex	1	1	NA
GO.0007015..actin.filament.organization	1	1	NA
GO.0010631..epithelial.cell.migration	1	1	NA
GO.0031252..cell.leading.edge	1	1	NA
GO.0034314..Arp2.3.complex.mediated.actin.nucleation	1	1	NA
GO.0009790..embryo.development	1	1	NA
GO.0015629..actin.cytoskeleton	0.080623	1	pfn-3
GO.0030833..regulation.of.actin.filament.polymerization	1	1	NA
GO.0000176..nuclear.exosome..RNase.complex.	1	1	NA
GO.0000177..cytoplasmic.exosome..RNase.complex.	1	1	NA
GO.0004527..exonuclease.activity	1	1	NA
GO.0005730..nucleolus	1	1	NA
GO.0016075..rRNA.catabolic.process	1	1	NA
GO.0031125..rRNA.3.end.processing	1	1	NA
GO.0034427..nuclear.transcribed.mRNA.catabolic.process..exonucleolytic..3.5	1	1	NA
GO.0034475..U4.snRNA.3.end.processing	1	1	NA
GO.0071028..nuclear.mRNA.surveillance	1	1	NA
GO.0071051..polyadenylation.dependent.snoRNA.3.end.processing	1	1	NA
GO.0030041..actin.filament.polymerization	1	1	NA
GO.0000276..mitochondrial.proton.transporting.ATP.synthase.complex..coupling.factor.F.o.	0.0442442	1	R04F11.2
GO.0034606..response.to.hermaphrodite.contact	0.127006	1	klp-11
GO.0046933..proton.transporting.ATP.synthase.activity..rotational.mechanism	0.0626081	1	F58F12.1
GO.0003713..transcription.coactivator.activity	1	1	NA
GO.0045893..positive.regulation.of.transcription..DNA.templated	1	1	NA
GO.0006754..ATP.biosynthetic.process	0.0504047	1	F58F12.1
GO.0015992..proton.transport	0.0236234	1	F58F12.1, vha-1
GO.0031966..mitochondrial.membrane	0.143796	1	phb-2
GO.0045263..proton.transporting.ATP.synthase.complex..coupling.factor.F.o.	1	1	NA
GO.0004767..sphingomyelin.phosphodiesterase.activity	1	1	NA
GO.0006665..sphingolipid.metabolic.process	1	1	NA
GO.0006685..sphingomyelin.catabolic.process	1	1	NA
GO.0016798..hydrolase.activity..acting.on.glycosyl.bonds	1	1	NA
GO.0046513..ceramide.biosynthetic.process	1	1	NA
GO.0004190..aspartic.type.endopeptidase.activity	1	1	NA
GO.0098591..external.side.of.apical.plasma.membrane	1	1	NA
GO.0070265..necrotic.cell.death	1	1	NA
GO.0000122..negative.regulation.of.transcription.from.RNA.polymerase.II.promoter	1	1	NA
GO.0001012..RNA.polymerase.II.regulatory.region.DNA.binding	1	1	NA
GO.0001078..transcriptional.repressor.activity..RNA.polymerase.II.core.promoter.proximal.region.sequence.specific.binding	1	1	NA
GO.0007623..circadian.rhythm	1	1	NA
GO.0000977..RNA.polymerase.II.regulatory.region.sequence.specific.DNA.binding	0.347906	1	hlh-1
GO.0000981..RNA.polymerase.II.transcription.factor.activity..sequence.specific.DNA.binding	1	1	NA
GO.0006357..regulation.of.transcription.from.RNA.polymerase.II.promoter	0.490668	1	tbx-2
GO.0031929..TOR.signaling	1	1	NA
GO.0006990..positive.regulation.of.transcription.from.RNA.polymerase.II.promoter.involved.in.unfolded.protein.response	1	1	NA
GO.0035966..response.to.topologically.incorrect.protein	1	1	NA
GO.1904576..response.to.tunicamycin	1	1	NA
GO.0045089..positive.regulation.of.innate.immune.response	1	1	NA
GO.0045824..negative.regulation.of.innate.immune.response	1	1	NA
GO.0051019..mitogen.activated.protein.kinase.binding	1	1	NA
GO.0005975..carbohydrate.metabolic.process	1	1	NA
GO.0043169..cation.binding	1	1	NA
GO.0000785..chromatin	1	1	NA
GO.0005929..cilium	1	1	NA
GO.0007617..mating.behavior	1	1	NA
GO.0015991..ATP.hydrolysis.coupled.proton.transport	0.143796	1	vha-1
GO.0016820..hydrolase.activity..acting.on.acid.anhydrides..catalyzing.transmembrane.movement.of.substances	1	1	NA
GO.0019904..protein.domain.specific.binding	0.176424	1	unc-95
GO.0033178..proton.transporting.two.sector.ATPase.complex..catalytic.domain	1	1	NA
GO.0043050..pharyngeal.pumping	0.171073	1	alp-1
GO.0045261..proton.transporting.ATP.synthase.complex..catalytic.core.F.1.	0.0318044	1	F58F12.1
GO.0046034..ATP.metabolic.process	1	1	NA
GO.0042776..mitochondrial.ATP.synthesis.coupled.proton.transport	1	1	NA
GO.0010494..cytoplasmic.stress.granule	1	1	NA
GO.0010603..regulation.of.cytoplasmic.mRNA.processing.body.assembly	1	1	NA
GO.0034063..stress.granule.assembly	1	1	NA
GO.0040022..feminization.of.hermaphroditic.germ.line	1	1	NA
GO.0044822..poly.A..RNA.binding	1	1	NA
GO.0051729..germline.cell.cycle.switching..mitotic.to.meiotic.cell.cycle	1	1	NA
GO.0006821..chloride.transport	1	1	NA
GO.0008068..extracellular.glutamate.gated.chloride.channel.activity	1	1	NA
GO.0008144..drug.binding	1	1	NA
GO.0031987..locomotion.involved.in.locomotory.behavior	1	1	NA
GO.0042493..response.to.drug	1	1	NA
GO.0043051..regulation.of.pharyngeal.pumping	0.202673	1	phb-2
GO.1902476..chloride.transmembrane.transport	1	1	NA
GO.0001508..action.potential	1	1	NA
GO.0000779..condensed.chromosome..centromeric.region	1	1	NA
GO.0003690..double.stranded.DNA.binding	1	1	NA
GO.0005654..nucleoplasm	1	1	NA
GO.0006997..nucleus.organization	1	1	NA
GO.0010165..response.to.X.ray	1	1	NA
GO.0051276..chromosome.organization	1	1	NA
GO.0006457..protein.folding	0.0164056	1	cyn-1, cyn-3, dnj-20
GO.0016049..cell.growth	1	1	NA
GO.0002009..morphogenesis.of.an.epithelium	1	1	NA
GO.0007155..cell.adhesion	0.285879	1	pat-2
GO.0007265..Ras.protein.signal.transduction	1	1	NA
GO.0008134..transcription.factor.binding	1	1	NA
GO.0016342..catenin.complex	1	1	NA
GO.0019903..protein.phosphatase.binding	1	1	NA
GO.0034333..adherens.junction.assembly	1	1	NA
GO.0034599..cellular.response.to.oxidative.stress	1	1	NA
GO.0042659..regulation.of.cell.fate.specification	1	1	NA
GO.0045294..alpha.catenin.binding	1	1	NA
GO.0045296..cadherin.binding	1	1	NA
GO.0048513..animal.organ.development	1	1	NA
GO.0006520..cellular.amino.acid.metabolic.process	1	1	NA
GO.0007606..sensory.perception.of.chemical.stimulus	1	1	NA
GO.0016831..carboxy.lyase.activity	1	1	NA
GO.0019752..carboxylic.acid.metabolic.process	1	1	NA
GO.0030170..pyridoxal.phosphate.binding	0.267109	1	T09B4.8
GO.0034607..turning.behavior.involved.in.mating	1	1	NA
GO.0036468..L.dopa.decarboxylase.activity	1	1	NA
GO.0042416..dopamine.biosynthetic.process	1	1	NA
GO.0042427..serotonin.biosynthetic.process	1	1	NA
GO.0004497..monooxygenase.activity	1	1	NA
GO.0004505..phenylalanine.4.monooxygenase.activity	1	1	NA
GO.0004510..tryptophan.5.monooxygenase.activity	1	1	NA
GO.0005506..iron.ion.binding	1	1	NA
GO.0006559..L.phenylalanine.catabolic.process	1	1	NA
GO.0006569..tryptophan.catabolic.process	1	1	NA
GO.0006571..tyrosine.biosynthetic.process	1	1	NA
GO.0009072..aromatic.amino.acid.family.metabolic.process	1	1	NA
GO.0016714..oxidoreductase.activity..acting.on.paired.donors..with.incorporation.or.reduction.of.molecular.oxygen..reduced.pteridine.as.one.donor..and.incorporation.of.one.atom.of.oxygen	1	1	NA
GO.0042438..melanin.biosynthetic.process	1	1	NA
GO.0005113..patched.binding	1	1	NA
GO.0005119..smoothened.binding	1	1	NA
GO.0030030..cell.projection.organization	1	1	NA
GO.0034464..BBSome	1	1	NA
GO.0035058..nonmotile.primary.cilium.assembly	1	1	NA
GO.0035721..intraciliary.retrograde.transport	1	1	NA
GO.0036064..ciliary.basal.body	1	1	NA
GO.0061512..protein.localization.to.cilium	1	1	NA
GO.0031514..motile.cilium	1	1	NA
GO.1903441..protein.localization.to.ciliary.membrane	1	1	NA
GO.0005198..structural.molecule.activity	1	1	NA
GO.0006890..retrograde.vesicle.mediated.transport..Golgi.to.ER	1	1	NA
GO.0008355..olfactory.learning	1	1	NA
GO.0042073..intraciliary.transport	1	1	NA
GO.0042384..cilium.assembly	1	1	NA
GO.0097546..ciliary.base	1	1	NA
GO.1904107..protein.localization.to.microvillus.membrane	1	1	NA
GO.0004089..carbonate.dehydratase.activity	1	1	NA
GO.0000045..autophagosome.assembly	0.127006	1	epg-6
GO.0000407..pre.autophagosomal.structure	1	1	NA
GO.0006914..autophagy	0.0224392	1	epg-2, ceh-13
GO.0009267..cellular.response.to.starvation	1	1	NA
GO.0012501..programmed.cell.death	1	1	NA
GO.0016023..cytoplasmic..membrane.bounded.vesicle	1	1	NA
GO.0032258..CVT.pathway	1	1	NA
GO.0034271..phosphatidylinositol.3.kinase.complex..class.III..type.I	1	1	NA
GO.0034272..phosphatidylinositol.3.kinase.complex..class.III..type.II	1	1	NA
GO.0040014..regulation.of.multicellular.organism.growth	1	1	NA
GO.0043277..apoptotic.cell.clearance	1	1	NA
GO.0044804..nucleophagy	0.0746564	1	epg-6
GO.0045138..nematode.male.tail.tip.morphogenesis	0.37689	1	iff-2
GO.0045324..late.endosome.to.vacuole.transport	1	1	NA
GO.0005874..microtubule	0.0675372	1	elp-1, klp-11
GO.0007017..microtubule.based.process	1	1	NA
GO.0007635..chemosensory.behavior	1	1	NA
GO.0004869..cysteine.type.endopeptidase.inhibitor.activity	1	1	NA
GO.0009966..regulation.of.signal.transduction	1	1	NA
GO.0016573..histone.acetylation	0.0982953	1	ZK1010.10
GO.1990001..inhibition.of.cysteine.type.endopeptidase.activity.involved.in.apoptotic.process	1	1	NA
GO.0005581..collagen.trimer	0.160346	1	col-119, col-130
GO.0042302..structural.constituent.of.cuticle	0.15583	1	col-119, col-130
GO.0042329..structural.constituent.of.collagen.and.cuticulin.based.cuticle	1	1	NA
GO.0060109..medial.layer.of.collagen.and.cuticulin.based.cuticle.extracellular.matrix	1	1	NA
GO.0030312..external.encapsulating.structure	1	1	NA
GO.0004601..peroxidase.activity	1	1	NA
GO.0016174..NAD.P.H.oxidase.activity	1	1	NA
GO.0018149..peptide.cross.linking	1	1	NA
GO.0020037..heme.binding	1	1	NA
GO.0040032..post.embryonic.body.morphogenesis	1	1	NA
GO.0042338..cuticle.development.involved.in.collagen.and.cuticulin.based.cuticle.molting.cycle	1	1	NA
GO.0042744..hydrogen.peroxide.catabolic.process	1	1	NA
GO.0098869..cellular.oxidant.detoxification	1	1	NA
GO.0008236..serine.type.peptidase.activity	1	1	NA
GO.0004867..serine.type.endopeptidase.inhibitor.activity	1	1	NA
GO.0010951..negative.regulation.of.endopeptidase.activity	1	1	NA
GO.0044254..multicellular.organismal.protein.catabolic.process	1	1	NA
GO.0000922..spindle.pole	1	1	NA
GO.0003777..microtubule.motor.activity	0.165687	1	klp-11
GO.0005871..kinesin.complex	0.132638	1	klp-11
GO.0007018..microtubule.based.movement	0.160267	1	klp-11
GO.0008017..microtubule.binding	0.207822	1	klp-11
GO.0008574..ATP.dependent.microtubule.motor.activity..plus.end.directed	1	1	NA
GO.1902845..negative.regulation.of.mitotic.spindle.elongation	1	1	NA
GO.0004077..biotin..acetyl.CoA.carboxylase..ligase.activity	1	1	NA
GO.0006464..cellular.protein.modification.process	1	1	NA
GO.0003682..chromatin.binding	1	1	NA
GO.0003712..transcription.cofactor.activity	0.0686515	1	ZK1010.10
GO.0030424..axon	1	1	NA
GO.0030512..negative.regulation.of.transforming.growth.factor.beta.receptor.signaling.pathway	1	1	NA
GO.0042393..histone.binding	1	1	NA
GO.0000724..double.strand.break.repair.via.homologous.recombination	1	1	NA
GO.0006289..nucleotide.excision.repair	1	1	NA
GO.0031436..BRCA1.BARD1.complex	1	1	NA
GO.0035066..positive.regulation.of.histone.acetylation	1	1	NA
GO.0035067..negative.regulation.of.histone.acetylation	1	1	NA
GO.0045717..negative.regulation.of.fatty.acid.biosynthetic.process	1	1	NA
GO.0051307..meiotic.chromosome.separation	1	1	NA
GO.0070531..BRCA1.A.complex	1	1	NA
GO.0071158..positive.regulation.of.cell.cycle.arrest	1	1	NA
GO.0008446..GDP.mannose.4.6.dehydratase.activity	1	1	NA
GO.0017085..response.to.insecticide	1	1	NA
GO.0019673..GDP.mannose.metabolic.process	1	1	NA
GO.0030017..sarcomere	1	1	NA
GO.0042350..GDP.L.fucose.biosynthetic.process	1	1	NA
GO.0042351..de.novo.GDP.L.fucose.biosynthetic.process	1	1	NA
GO.0075015..formation.of.infection.structure.on.or.near.host	1	1	NA
GO.0000139..Golgi.membrane	1	1	NA
GO.0006486..protein.glycosylation	1	1	NA
GO.0008376..acetylgalactosaminyltransferase.activity	1	1	NA
GO.0008378..galactosyltransferase.activity	1	1	NA
GO.0016757..transferase.activity..transferring.glycosyl.groups	1	1	NA
GO.0006688..glycosphingolipid.biosynthetic.process	1	1	NA
GO.0019187..beta.1.4.mannosyltransferase.activity	1	1	NA
GO.0097502..mannosylation	1	1	NA
GO.0009636..response.to.toxic.substance	1	1	NA
GO.0033207..beta.1.4.N.acetylgalactosaminyltransferase.activity	1	1	NA
GO.0045747..positive.regulation.of.Notch.signaling.pathway	1	1	NA
GO.0016051..carbohydrate.biosynthetic.process	1	1	NA
GO.0000126..transcription.factor.TFIIIB.complex	1	1	NA
GO.0006352..DNA.templated.transcription..initiation	1	1	NA
GO.0006384..transcription.initiation.from.RNA.polymerase.III.promoter	1	1	NA
GO.0017025..TBP.class.protein.binding	1	1	NA
GO.0019827..stem.cell.population.maintenance	1	1	NA
GO.1903506..regulation.of.nucleic.acid.templated.transcription	1	1	NA
GO.0000775..chromosome..centromeric.region	1	1	NA
GO.0000776..kinetochore	1	1	NA
GO.0000777..condensed.chromosome.kinetochore	1	1	NA
GO.0007094..mitotic.spindle.assembly.checkpoint	1	1	NA
GO.0010940..positive.regulation.of.necrotic.cell.death	1	1	NA
GO.0044281..small.molecule.metabolic.process	1	1	NA
GO.0005509..calcium.ion.binding	0.625138	1	cal-5
GO.0004714..transmembrane.receptor.protein.tyrosine.kinase.activity	1	1	NA
GO.0005109..frizzled.binding	1	1	NA
GO.0007411..axon.guidance	0.408458	1	ceh-13
GO.0017147..Wnt.protein.binding	1	1	NA
GO.0018108..peptidyl.tyrosine.phosphorylation	1	1	NA
GO.0031594..neuromuscular.junction	0.0565259	1	elp-1
GO.0032809..neuronal.cell.body.membrane	1	1	NA
GO.0043204..perikaryon	1	1	NA
GO.0045200..establishment.of.neuroblast.polarity	1	1	NA
GO.0005869..dynactin.complex	1	1	NA
GO.0008290..F.actin.capping.protein.complex	1	1	NA
GO.0051693..actin.filament.capping	1	1	NA
GO.0000578..embryonic.axis.specification	1	1	NA
GO.0000902..cell.morphogenesis	1	1	NA
GO.0010591..regulation.of.lamellipodium.assembly	1	1	NA
GO.0051490..negative.regulation.of.filopodium.assembly	1	1	NA
GO.0007631..feeding.behavior	1	1	NA
GO.0008504..monoamine.transmembrane.transporter.activity	1	1	NA
GO.0015844..monoamine.transport	1	1	NA
GO.0004511..tyrosine.3.monooxygenase.activity	1	1	NA
GO.0007638..mechanosensory.behavior	1	1	NA
GO.0032094..response.to.food	1	1	NA
GO.0042136..neurotransmitter.biosynthetic.process	1	1	NA
GO.0042417..dopamine.metabolic.process	1	1	NA
GO.0042423..catecholamine.biosynthetic.process	1	1	NA
GO.0003934..GTP.cyclohydrolase.I.activity	1	1	NA
GO.0006729..tetrahydrobiopterin.biosynthetic.process	1	1	NA
GO.0035998..7.8.dihydroneopterin.3.triphosphate.biosynthetic.process	1	1	NA
GO.0046654..tetrahydrofolate.biosynthetic.process	1	1	NA
GO.0005901..caveola	1	1	NA
GO.0009898..cytoplasmic.side.of.plasma.membrane	1	1	NA
GO.0030133..transport.vesicle	1	1	NA
GO.0046662..regulation.of.oviposition	1	1	NA
GO.0048471..perinuclear.region.of.cytoplasm	1	1	NA
GO.0060473..cortical.granule	1	1	NA
GO.0070836..caveola.assembly	1	1	NA
GO.0005319..lipid.transporter.activity	1	1	NA
GO.0007166..cell.surface.receptor.signaling.pathway	1	1	NA
GO.0007567..parturition	1	1	NA
GO.0004402..histone.acetyltransferase.activity	0.0865515	1	ZK1010.10
GO.0004468..lysine.N.acetyltransferase.activity..acting.on.acetyl.phosphate.as.donor	1	1	NA
GO.0010975..regulation.of.neuron.projection.development	1	1	NA
GO.0016746..transferase.activity..transferring.acyl.groups	1	1	NA
GO.0018393..internal.peptidyl.lysine.acetylation	1	1	NA
GO.0043065..positive.regulation.of.apoptotic.process	1	1	NA
GO.0061629..RNA.polymerase.II.sequence.specific.DNA.binding.transcription.factor.binding	1	1	NA
GO.0005244..voltage.gated.ion.channel.activity	1	1	NA
GO.0005245..voltage.gated.calcium.channel.activity	1	1	NA
GO.0005261..cation.channel.activity	1	1	NA
GO.0005262..calcium.channel.activity	1	1	NA
GO.0005891..voltage.gated.calcium.channel.complex	1	1	NA
GO.0006816..calcium.ion.transport	1	1	NA
GO.0008332..low.voltage.gated.calcium.channel.activity	1	1	NA
GO.0034765..regulation.of.ion.transmembrane.transport	1	1	NA
GO.0045760..positive.regulation.of.action.potential	1	1	NA
GO.0051899..membrane.depolarization	1	1	NA
GO.0070588..calcium.ion.transmembrane.transport	1	1	NA
GO.0086010..membrane.depolarization.during.action.potential	1	1	NA
GO.0007528..neuromuscular.junction.development	1	1	NA
GO.0008331..high.voltage.gated.calcium.channel.activity	1	1	NA
GO.0051924..regulation.of.calcium.ion.transport	1	1	NA
GO.1901385..regulation.of.voltage.gated.calcium.channel.activity	1	1	NA
GO.0004518..nuclease.activity	1	1	NA
GO.0004535..poly.A..specific.ribonuclease.activity	1	1	NA
GO.0006417..regulation.of.translation	1	1	NA
GO.0017148..negative.regulation.of.translation	0.104111	1	ntl-2
GO.0030014..CCR4.NOT.complex	1	1	NA
GO.0030015..CCR4.NOT.core.complex	0.0380442	1	ntl-2
GO.0031047..gene.silencing.by.RNA	1	1	NA
GO.0043186..P.granule	1	1	NA
GO.0043928..exonucleolytic.nuclear.transcribed.mRNA.catabolic.process.involved.in.deadenylation.dependent.decay	1	1	NA
GO.0090503..RNA.phosphodiester.bond.hydrolysis..exonucleolytic	1	1	NA
GO.0004129..cytochrome.c.oxidase.activity	1	1	NA
GO.0005740..mitochondrial.envelope	1	1	NA
GO.0016705..oxidoreductase.activity..acting.on.paired.donors..with.incorporation.or.reduction.of.molecular.oxygen	1	1	NA
GO.0010332..response.to.gamma.radiation	1	1	NA
GO.0005832..chaperonin.containing.T.complex	1	1	NA
GO.0051082..unfolded.protein.binding	0.192274	1	dnj-20
GO.0006270..DNA.replication.initiation	1	1	NA
GO.0004721..phosphoprotein.phosphatase.activity	1	1	NA
GO.0004722..protein.serine.threonine.phosphatase.activity	1	1	NA
GO.0004725..protein.tyrosine.phosphatase.activity	1	1	NA
GO.0006470..protein.dephosphorylation	1	1	NA
GO.0007096..regulation.of.exit.from.mitosis	1	1	NA
GO.0008138..protein.tyrosine.serine.threonine.phosphatase.activity	1	1	NA
GO.0016311..dephosphorylation	1	1	NA
GO.0016791..phosphatase.activity	1	1	NA
GO.0035335..peptidyl.tyrosine.dephosphorylation	1	1	NA
GO.0040038..polar.body.extrusion.after.meiotic.divisions	1	1	NA
GO.0045786..negative.regulation.of.cell.cycle	1	1	NA
GO.0060284..regulation.of.cell.development	1	1	NA
GO.0071850..mitotic.cell.cycle.arrest	1	1	NA
GO.1990023..mitotic.spindle.midzone	1	1	NA
GO.0000087..mitotic.M.phase	1	1	NA
GO.0000212..meiotic.spindle.organization	1	1	NA
GO.0000132..establishment.of.mitotic.spindle.orientation	1	1	NA
GO.0007163..establishment.or.maintenance.of.cell.polarity	1	1	NA
GO.0032970..regulation.of.actin.filament.based.process	1	1	NA
GO.0040001..establishment.of.mitotic.spindle.localization	1	1	NA
GO.0055037..recycling.endosome	1	1	NA
GO.0004126..cytidine.deaminase.activity	1	1	NA
GO.0006217..deoxycytidine.catabolic.process	1	1	NA
GO.0009451..RNA.modification	1	1	NA
GO.0009972..cytidine.deamination	1	1	NA
GO.0016070..RNA.metabolic.process	1	1	NA
GO.0047844..deoxycytidine.deaminase.activity	1	1	NA
GO.0005385..zinc.ion.transmembrane.transporter.activity	1	1	NA
GO.0006812..cation.transport	1	1	NA
GO.0006829..zinc.II.ion.transport	1	1	NA
GO.0008324..cation.transmembrane.transporter.activity	1	1	NA
GO.0010043..response.to.zinc.ion	1	1	NA
GO.0046579..positive.regulation.of.Ras.protein.signal.transduction	1	1	NA
GO.0061088..regulation.of.sequestering.of.zinc.ion	1	1	NA
GO.0071294..cellular.response.to.zinc.ion	1	1	NA
GO.0071577..zinc.II.ion.transmembrane.transport	1	1	NA
GO.0007156..homophilic.cell.adhesion.via.plasma.membrane.adhesion.molecules	1	1	NA
GO.0097402..neuroblast.migration	1	1	NA
GO.0008306..associative.learning	1	1	NA
GO.0001556..oocyte.maturation	1	1	NA
GO.0004693..cyclin.dependent.protein.serine.threonine.kinase.activity	1	1	NA
GO.0005815..microtubule.organizing.center	1	1	NA
GO.0008353..RNA.polymerase.II.carboxy.terminal.domain.kinase.activity	1	1	NA
GO.0032436..positive.regulation.of.proteasomal.ubiquitin.dependent.protein.catabolic.process	1	1	NA
GO.0045836..positive.regulation.of.meiotic.nuclear.division	1	1	NA
GO.0051446..positive.regulation.of.meiotic.cell.cycle	1	1	NA
GO.0071902..positive.regulation.of.protein.serine.threonine.kinase.activity	1	1	NA
GO.0007530..sex.determination	1	1	NA
GO.0008584..male.gonad.development	1	1	NA
GO.0009791..post.embryonic.development	1	1	NA
GO.0032877..positive.regulation.of.DNA.endoreduplication	1	1	NA
GO.0044843..cell.cycle.G1.S.phase.transition	1	1	NA
GO.1900087..positive.regulation.of.G1.S.transition.of.mitotic.cell.cycle	1	1	NA
GO.0010468..regulation.of.gene.expression	1	1	NA
GO.0030951..establishment.or.maintenance.of.microtubule.cytoskeleton.polarity	1	1	NA
GO.0048489..synaptic.vesicle.transport	1	1	NA
GO.0051222..positive.regulation.of.protein.transport	1	1	NA
GO.0051965..positive.regulation.of.synapse.assembly	1	1	NA
GO.1902803..regulation.of.synaptic.vesicle.transport	1	1	NA
GO.1904799..regulation.of.neuron.remodeling	1	1	NA
GO.1904810..negative.regulation.of.dense.core.granule.transport	1	1	NA
GO.1904811..positive.regulation.of.dense.core.granule.transport	1	1	NA
GO.2000331..regulation.of.terminal.button.organization	1	1	NA
GO.0005675..holo.TFIIH.complex	1	1	NA
GO.0009299..mRNA.transcription	1	1	NA
GO.0045448..mitotic.cell.cycle..embryonic	1	1	NA
GO.0051726..regulation.of.cell.cycle	1	1	NA
GO.0000082..G1.S.transition.of.mitotic.cell.cycle	1	1	NA
GO.0003729..mRNA.binding	0.0190415	1	lin-28, rpl-35
GO.0003730..mRNA.3.UTR.binding	0.10989	1	lin-28
GO.0007076..mitotic.chromosome.condensation	1	1	NA
GO.1990170..stress.response.to.cadmium.ion	1	1	NA
GO.0006260..DNA.replication	0.290497	1	mtss-1
GO.0001845..phagolysosome.assembly	1	1	NA
GO.0001891..phagocytic.cup	1	1	NA
GO.0005044..scavenger.receptor.activity	1	1	NA
GO.0030670..phagocytic.vesicle.membrane	1	1	NA
GO.0031260..pseudopodium.membrane	1	1	NA
GO.0031532..actin.cytoskeleton.reorganization	1	1	NA
GO.0034620..cellular.response.to.unfolded.protein	1	1	NA
GO.0043654..recognition.of.apoptotic.cell	1	1	NA
GO.0005070..SH3.SH2.adaptor.activity	1	1	NA
GO.0006909..phagocytosis	1	1	NA
GO.0009967..positive.regulation.of.signal.transduction	1	1	NA
GO.0032403..protein.complex.binding	1	1	NA
GO.0004175..endopeptidase.activity	0.127006	1	pas-3
GO.0004197..cysteine.type.endopeptidase.activity	1	1	NA
GO.0008234..cysteine.type.peptidase.activity	1	1	NA
GO.0016540..protein.autoprocessing	1	1	NA
GO.0030155..regulation.of.cell.adhesion	1	1	NA
GO.0042981..regulation.of.apoptotic.process	1	1	NA
GO.0097194..execution.phase.of.apoptosis	1	1	NA
GO.0097200..cysteine.type.endopeptidase.activity.involved.in.execution.phase.of.apoptosis	1	1	NA
GO.1902742..apoptotic.process.involved.in.development	1	1	NA
GO.0008635..activation.of.cysteine.type.endopeptidase.activity.involved.in.apoptotic.process.by.cytochrome.c	1	1	NA
GO.0008656..cysteine.type.endopeptidase.activator.activity.involved.in.apoptotic.process	1	1	NA
GO.0010954..positive.regulation.of.protein.processing	1	1	NA
GO.0016505..peptidase.activator.activity.involved.in.apoptotic.process	1	1	NA
GO.0043281..regulation.of.cysteine.type.endopeptidase.activity.involved.in.apoptotic.process	1	1	NA
GO.0043531..ADP.binding	1	1	NA
GO.0051432..BH1.domain.binding	1	1	NA
GO.0051434..BH3.domain.binding	1	1	NA
GO.0061133..endopeptidase.activator.activity	1	1	NA
GO.2001056..positive.regulation.of.cysteine.type.endopeptidase.activity	1	1	NA
GO.0017124..SH3.domain.binding	1	1	NA
GO.0032045..guanyl.nucleotide.exchange.factor.complex	1	1	NA
GO.0005124..scavenger.receptor.binding	1	1	NA
GO.0045309..protein.phosphorylated.amino.acid.binding	1	1	NA
GO.0045335..phagocytic.vesicle	1	1	NA
GO.0070782..phosphatidylserine.exposure.on.apoptotic.cell.surface	1	1	NA
GO.0000422..mitophagy	0.115632	1	epg-6
GO.0005741..mitochondrial.outer.membrane	0.121337	1	tomm-20
GO.0008630..intrinsic.apoptotic.signaling.pathway.in.response.to.DNA.damage	1	1	NA
GO.0010636..positive.regulation.of.mitochondrial.fusion	1	1	NA
GO.0031090..organelle.membrane	1	1	NA
GO.0043069..negative.regulation.of.programmed.cell.death	1	1	NA
GO.0046982..protein.heterodimerization.activity	0.326391	1	his-62
GO.0097192..extrinsic.apoptotic.signaling.pathway.in.absence.of.ligand	1	1	NA
GO.2001243..negative.regulation.of.intrinsic.apoptotic.signaling.pathway	1	1	NA
GO.0001764..neuron.migration	1	1	NA
GO.0008045..motor.neuron.axon.guidance	1	1	NA
GO.0010172..embryonic.body.morphogenesis	1	1	NA
GO.0031103..axon.regeneration	1	1	NA
GO.0033563..dorsal.ventral.axon.guidance	1	1	NA
GO.0048812..neuron.projection.morphogenesis	1	1	NA
GO.0048846..axon.extension.involved.in.axon.guidance	1	1	NA
GO.0050764..regulation.of.phagocytosis	1	1	NA
GO.0097628..distal.tip.cell.migration	1	1	NA
GO.0005547..phosphatidylinositol.3.4.5.trisphosphate.binding	1	1	NA
GO.0006911..phagocytosis..engulfment	1	1	NA
GO.0017048..Rho.GTPase.binding	1	1	NA
GO.0035262..gonad.morphogenesis	0.165687	1	iff-2
GO.0060097..cytoskeletal.rearrangement.involved.in.phagocytosis..engulfment	1	1	NA
GO.0070064..proline.rich.region.binding	1	1	NA
GO.0070273..phosphatidylinositol.4.phosphate.binding	0.0380442	1	epg-6
GO.0080025..phosphatidylinositol.3.5.bisphosphate.binding	0.0255246	1	epg-6
GO.0051400..BH.domain.binding	1	1	NA
GO.0007588..excretion	1	1	NA
GO.0030104..water.homeostasis	1	1	NA
GO.0060290..transdifferentiation	0.0626081	1	jmjd-3.1
GO.1904081..positive.regulation.of.transcription.from.RNA.polymerase.II.promoter.involved.in.neuron.differentiation	1	1	NA
GO.0021520..spinal.cord.motor.neuron.cell.fate.specification	1	1	NA
GO.0007413..axonal.fasciculation	0.0804203	1	unc-95, ceh-13
GO.0016337..single.organismal.cell.cell.adhesion	0.0626081	1	ceh-13
GO.0016358..dendrite.development	0.207822	1	ceh-13
GO.0016048..detection.of.temperature.stimulus	1	1	NA
GO.0030182..neuron.differentiation	1	1	NA
GO.0040040..thermosensory.behavior	1	1	NA
GO.0009957..epidermal.cell.fate.specification	1	1	NA
GO.0045026..plasma.membrane.fusion	1	1	NA
GO.0048859..formation.of.anatomical.boundary	1	1	NA
GO.0001228..transcriptional.activator.activity..RNA.polymerase.II.transcription.regulatory.region.sequence.specific.binding	0.0982953	1	hlh-1
GO.0030516..regulation.of.axon.extension	1	1	NA
GO.0008354..germ.cell.migration	1	1	NA
GO.0008544..epidermis.development	1	1	NA
GO.1900194..negative.regulation.of.oocyte.maturation	1	1	NA
GO.0001225..RNA.polymerase.II.transcription.coactivator.binding	1	1	NA
GO.0007498..mesoderm.development	1	1	NA
GO.0007501..mesodermal.cell.fate.specification	0.0626081	1	unc-62
GO.0009786..regulation.of.asymmetric.cell.division	1	1	NA
GO.0009952..anterior.posterior.pattern.specification	1	1	NA
GO.0042692..muscle.cell.differentiation	0.0192045	1	unc-62
GO.0001077..transcriptional.activator.activity..RNA.polymerase.II.core.promoter.proximal.region.sequence.specific.binding	1	1	NA
GO.0043282..pharyngeal.muscle.development	0.0442442	1	tbx-2
GO.0034243..regulation.of.transcription.elongation.from.RNA.polymerase.II.promoter	1	1	NA
GO.0055007..cardiac.muscle.cell.differentiation	1	1	NA
GO.0050807..regulation.of.synapse.organization	1	1	NA
GO.0007548..sex.differentiation	1	1	NA
GO.0009888..tissue.development	1	1	NA
GO.0009886..post.embryonic.morphogenesis	1	1	NA
GO.0048665..neuron.fate.specification	1	1	NA
GO.0000723..telomere.maintenance	1	1	NA
GO.0000781..chromosome..telomeric.region	1	1	NA
GO.0000784..nuclear.chromosome..telomeric.region	1	1	NA
GO.0003691..double.stranded.telomeric.DNA.binding	1	1	NA
GO.0008301..DNA.binding..bending	1	1	NA
GO.0016233..telomere.capping	1	1	NA
GO.0032200..telomere.organization	1	1	NA
GO.0042048..olfactory.behavior	0.138235	1	tbx-2
GO.0042162..telomeric.DNA.binding	1	1	NA
GO.0007538..primary.sex.determination	1	1	NA
GO.0043073..germ.cell.nucleus	1	1	NA
GO.0006891..intra.Golgi.vesicle.mediated.transport	1	1	NA
GO.0030173..integral.component.of.Golgi.membrane	1	1	NA
GO.0006030..chitin.metabolic.process	1	1	NA
GO.0008061..chitin.binding	1	1	NA
GO.0030703..eggshell.formation	1	1	NA
GO.0004484..mRNA.guanylyltransferase.activity	1	1	NA
GO.0004651..polynucleotide.5.phosphatase.activity	1	1	NA
GO.0006370..7.methylguanosine.mRNA.capping	1	1	NA
GO.0010628..positive.regulation.of.gene.expression	1	1	NA
GO.0098507..polynucleotide.5.dephosphorylation	1	1	NA
GO.0001666..response.to.hypoxia	1	1	NA
GO.0042594..response.to.starvation	1	1	NA
GO.0042770..signal.transduction.in.response.to.DNA.damage	1	1	NA
GO.0043068..positive.regulation.of.programmed.cell.death	1	1	NA
GO.0043021..ribonucleoprotein.complex.binding	1	1	NA
GO.0035567..non.canonical.Wnt.signaling.pathway	1	1	NA
GO.0042813..Wnt.activated.receptor.activity	1	1	NA
GO.0060070..canonical.Wnt.signaling.pathway	1	1	NA
GO.0003724..RNA.helicase.activity	1	1	NA
GO.0004004..ATP.dependent.RNA.helicase.activity	1	1	NA
GO.0004386..helicase.activity	1	1	NA
GO.0010501..RNA.secondary.structure.unwinding	1	1	NA
GO.0016071..mRNA.metabolic.process	1	1	NA
GO.0033962..cytoplasmic.mRNA.processing.body.assembly	1	1	NA
GO.0043229..intracellular.organelle	1	1	NA
GO.0003746..translation.elongation.factor.activity	0.104111	1	iff-2
GO.0006414..translational.elongation	0.104111	1	iff-2
GO.0004102..choline.O.acetyltransferase.activity	1	1	NA
GO.0008292..acetylcholine.biosynthetic.process	1	1	NA
GO.0060076..excitatory.synapse	1	1	NA
GO.0000118..histone.deacetylase.complex	1	1	NA
GO.0001709..cell.fate.determination	1	1	NA
GO.0003678..DNA.helicase.activity	1	1	NA
GO.0006338..chromatin.remodeling	1	1	NA
GO.0016818..hydrolase.activity..acting.on.acid.anhydrides..in.phosphorus.containing.anhydrides	1	1	NA
GO.0032508..DNA.duplex.unwinding	1	1	NA
GO.0046580..negative.regulation.of.Ras.protein.signal.transduction	1	1	NA
GO.0030992..intraciliary.transport.particle.B	1	1	NA
GO.0003774..motor.activity	1	1	NA
GO.0030286..dynein.complex	1	1	NA
GO.0034608..vulval.location	0.0924422	1	klp-11
GO.0051959..dynein.light.intermediate.chain.binding	1	1	NA
GO.0060170..ciliary.membrane	1	1	NA
GO.0061066..positive.regulation.of.dauer.larval.development	1	1	NA
GO.0005222..intracellular.cAMP.activated.cation.channel.activity	1	1	NA
GO.0005223..intracellular.cGMP.activated.cation.channel.activity	1	1	NA
GO.0005249..voltage.gated.potassium.channel.activity	1	1	NA
GO.0030553..cGMP.binding	1	1	NA
GO.0042391..regulation.of.membrane.potential	1	1	NA
GO.0071805..potassium.ion.transmembrane.transport	1	1	NA
GO.0005921..gap.junction	1	1	NA
GO.0006972..hyperosmotic.response	1	1	NA
GO.0009408..response.to.heat	0.271847	1	sti-1
GO.0030991..intraciliary.transport.particle.A	1	1	NA
GO.0035720..intraciliary.anterograde.transport	1	1	NA
GO.0035869..ciliary.transition.zone	1	1	NA
GO.0007224..smoothened.signaling.pathway	1	1	NA
GO.0004100..chitin.synthase.activity	1	1	NA
GO.0016758..transferase.activity..transferring.hexosyl.groups	1	1	NA
GO.0033314..mitotic.DNA.replication.checkpoint	1	1	NA
GO.0051574..positive.regulation.of.histone.H3.K9.methylation	1	1	NA
GO.0000209..protein.polyubiquitination	1	1	NA
GO.0030544..Hsp70.protein.binding	0.0192045	1	sti-1
GO.0034450..ubiquitin.ubiquitin.ligase.activity	1	1	NA
GO.0045214..sarcomere.organization	1	1	NA
GO.0051865..protein.autoubiquitination	1	1	NA
GO.0006814..sodium.ion.transport	1	1	NA
GO.0015220..choline.transmembrane.transporter.activity	1	1	NA
GO.0015293..symporter.activity	1	1	NA
GO.0015871..choline.transport	1	1	NA
GO.0000272..polysaccharide.catabolic.process	1	1	NA
GO.0004553..hydrolase.activity..hydrolyzing.O.glycosyl.compounds	1	1	NA
GO.0004568..chitinase.activity	1	1	NA
GO.0006032..chitin.catabolic.process	1	1	NA
GO.0009620..response.to.fungus	1	1	NA
GO.0000307..cyclin.dependent.protein.kinase.holoenzyme.complex	1	1	NA
GO.0016538..cyclin.dependent.protein.serine.threonine.kinase.regulator.activity	1	1	NA
GO.0045737..positive.regulation.of.cyclin.dependent.protein.serine.threonine.kinase.activity	1	1	NA
GO.1901409..positive.regulation.of.phosphorylation.of.RNA.polymerase.II.C.terminal.domain	1	1	NA
GO.0004103..choline.kinase.activity	1	1	NA
GO.0006657..CDP.choline.pathway	1	1	NA
GO.0004305..ethanolamine.kinase.activity	1	1	NA
GO.0006646..phosphatidylethanolamine.biosynthetic.process	1	1	NA
GO.0006656..phosphatidylcholine.biosynthetic.process	1	1	NA
GO.0008654..phospholipid.biosynthetic.process	1	1	NA
GO.0004860..protein.kinase.inhibitor.activity	1	1	NA
GO.0004861..cyclin.dependent.protein.serine.threonine.kinase.inhibitor.activity	1	1	NA
GO.0007050..cell.cycle.arrest	1	1	NA
GO.0032875..regulation.of.DNA.endoreduplication	1	1	NA
GO.0045596..negative.regulation.of.cell.differentiation	1	1	NA
GO.0045605..negative.regulation.of.epidermal.cell.differentiation	1	1	NA
GO.0051302..regulation.of.cell.division	1	1	NA
GO.0071901..negative.regulation.of.protein.serine.threonine.kinase.activity	1	1	NA
GO.1902806..regulation.of.cell.cycle.G1.S.phase.transition	1	1	NA
GO.1904030..negative.regulation.of.cyclin.dependent.protein.kinase.activity	1	1	NA
GO.2000134..negative.regulation.of.G1.S.transition.of.mitotic.cell.cycle	1	1	NA
GO.0004683..calmodulin.dependent.protein.kinase.activity	1	1	NA
GO.0019722..calcium.mediated.signaling	1	1	NA
GO.0032793..positive.regulation.of.CREB.transcription.factor.activity	1	1	NA
GO.0045860..positive.regulation.of.protein.kinase.activity	1	1	NA
GO.0004003..ATP.dependent.DNA.helicase.activity	1	1	NA
GO.0006303..double.strand.break.repair.via.nonhomologous.end.joining	1	1	NA
GO.0006310..DNA.recombination	1	1	NA
GO.0043564..Ku70.Ku80.complex	1	1	NA
GO.0071480..cellular.response.to.gamma.radiation	1	1	NA
GO.0071481..cellular.response.to.X.ray	1	1	NA
GO.0016817..hydrolase.activity..acting.on.acid.anhydrides	1	1	NA
GO.0005911..cell.cell.junction	1	1	NA
GO.0090136..epithelial.cell.cell.adhesion	1	1	NA
GO.0005604..basement.membrane	1	1	NA
GO.0031012..extracellular.matrix	1	1	NA
GO.0050808..synapse.organization	1	1	NA
GO.0005247..voltage.gated.chloride.channel.activity	1	1	NA
GO.1903959..regulation.of.anion.transmembrane.transport	1	1	NA
GO.0010466..negative.regulation.of.peptidase.activity	1	1	NA
GO.0030414..peptidase.inhibitor.activity	1	1	NA
GO.0000975..regulatory.region.DNA.binding	1	1	NA
GO.0001933..negative.regulation.of.protein.phosphorylation	1	1	NA
GO.0001934..positive.regulation.of.protein.phosphorylation	1	1	NA
GO.0006119..oxidative.phosphorylation	1	1	NA
GO.0006744..ubiquinone.biosynthetic.process	0.0504047	1	coq-3
GO.0010629..negative.regulation.of.gene.expression	1	1	NA
GO.0030534..adult.behavior	1	1	NA
GO.0045333..cellular.respiration	1	1	NA
GO.0048520..positive.regulation.of.behavior	1	1	NA
GO.0051094..positive.regulation.of.developmental.process	1	1	NA
GO.0061063..positive.regulation.of.nematode.larval.development	1	1	NA
GO.1904808..positive.regulation.of.protein.oxidation	1	1	NA
GO.2000377..regulation.of.reactive.oxygen.species.metabolic.process	1	1	NA
GO.0009411..response.to.UV	1	1	NA
GO.0005765..lysosomal.membrane	1	1	NA
GO.0007034..vacuolar.transport	1	1	NA
GO.0015809..arginine.transport	1	1	NA
GO.0031301..integral.component.of.organelle.membrane	1	1	NA
GO.0051453..regulation.of.intracellular.pH	1	1	NA
GO.0004198..calcium.dependent.cysteine.type.endopeptidase.activity	1	1	NA
GO.0005001..transmembrane.receptor.protein.tyrosine.phosphatase.activity	1	1	NA
GO.0040037..negative.regulation.of.fibroblast.growth.factor.receptor.signaling.pathway	1	1	NA
GO.0016482..cytosolic.transport	1	1	NA
GO.0031134..sister.chromatid.biorientation	1	1	NA
GO.0051306..mitotic.sister.chromatid.separation	1	1	NA
GO.0072686..mitotic.spindle	1	1	NA
GO.0031965..nuclear.membrane	1	1	NA
GO.0051296..establishment.of.meiotic.spindle.orientation	1	1	NA
GO.0071944..cell.periphery	1	1	NA
GO.0045664..regulation.of.neuron.differentiation	1	1	NA
GO.0010754..negative.regulation.of.cGMP.mediated.signaling	1	1	NA
GO.0070482..response.to.oxygen.levels	1	1	NA
GO.0048609..multicellular.organismal.reproductive.process	1	1	NA
GO.2001235..positive.regulation.of.apoptotic.signaling.pathway	1	1	NA
GO.0055059..asymmetric.neuroblast.division	1	1	NA
GO.0060582..cell.fate.determination.involved.in.pattern.specification	1	1	NA
GO.0090630..activation.of.GTPase.activity	1	1	NA
GO.0030246..carbohydrate.binding	1	1	NA
GO.0007368..determination.of.left.right.symmetry	1	1	NA
GO.0070491..repressing.transcription.factor.binding	1	1	NA
GO.0007030..Golgi.organization	1	1	NA
GO.0017119..Golgi.transport.complex	1	1	NA
GO.0000228..nuclear.chromosome	1	1	NA
GO.0007130..synaptonemal.complex.assembly	1	1	NA
GO.0051177..meiotic.sister.chromatid.cohesion	1	1	NA
GO.0002164..larval.development	1	1	NA
GO.0060107..annuli.extracellular.matrix	1	1	NA
GO.0060111..alae.of.collagen.and.cuticulin.based.cuticle.extracellular.matrix	1	1	NA
GO.0008299..isoprenoid.biosynthetic.process	1	1	NA
GO.0031314..extrinsic.component.of.mitochondrial.inner.membrane	0.0255246	1	coq-3
GO.0002083..4.hydroxybenzoate.decaprenyltransferase.activity	1	1	NA
GO.0004659..prenyltransferase.activity	1	1	NA
GO.0047293..4.hydroxybenzoate.nonaprenyltransferase.activity	1	1	NA
GO.0008168..methyltransferase.activity	0.412291	1	coq-3
GO.0008757..S.adenosylmethionine.dependent.methyltransferase.activity	0.0865515	1	coq-3
GO.0016709..oxidoreductase.activity..acting.on.paired.donors..with.incorporation.or.reduction.of.molecular.oxygen..NAD.P.H.as.one.donor..and.incorporation.of.one.atom.of.oxygen	1	1	NA
GO.0044550..secondary.metabolite.biosynthetic.process	1	1	NA
GO.0000900..translation.repressor.activity..nucleic.acid.binding	1	1	NA
GO.0008135..translation.factor.activity..RNA.binding	1	1	NA
GO.0043022..ribosome.binding	0.080623	1	iff-2
GO.1990124..messenger.ribonucleoprotein.complex	1	1	NA
GO.2000766..negative.regulation.of.cytoplasmic.translation	1	1	NA
GO.0005847..mRNA.cleavage.and.polyadenylation.specificity.factor.complex	1	1	NA
GO.0016607..nuclear.speck	1	1	NA
GO.0031124..mRNA.3.end.processing	1	1	NA
GO.0098789..pre.mRNA.cleavage.required.for.polyadenylation	1	1	NA
GO.0016810..hydrolase.activity..acting.on.carbon.nitrogen..but.not.peptide..bonds	1	1	NA
GO.0019239..deaminase.activity	1	1	NA
GO.0031983..vesicle.lumen	1	1	NA
GO.0042718..yolk.granule	1	1	NA
GO.0051603..proteolysis.involved.in.cellular.protein.catabolic.process	0.242959	1	pas-3
GO.0030016..myofibril	1	1	NA
GO.0000737..DNA.catabolic.process..endonucleolytic	1	1	NA
GO.0004519..endonuclease.activity	1	1	NA
GO.0004520..endodeoxyribonuclease.activity	1	1	NA
GO.0004521..endoribonuclease.activity	1	1	NA
GO.0006309..apoptotic.DNA.fragmentation	1	1	NA
GO.0006401..RNA.catabolic.process	1	1	NA
GO.0060102..collagen.and.cuticulin.based.cuticle.extracellular.matrix	1	1	NA
GO.0045177..apical.part.of.cell	1	1	NA
GO.0001223..transcription.coactivator.binding	1	1	NA
GO.0048256..flap.endonuclease.activity	1	1	NA
GO.0004536..deoxyribonuclease.activity	1	1	NA
GO.0016888..endodeoxyribonuclease.activity..producing.5.phosphomonoesters	1	1	NA
GO.0000178..exosome..RNase.complex.	1	1	NA
GO.0006139..nucleobase.containing.compound.metabolic.process	1	1	NA
GO.0008408..3.5.exonuclease.activity	1	1	NA
GO.0044237..cellular.metabolic.process	1	1	NA
GO.0000738..DNA.catabolic.process..exonucleolytic	1	1	NA
GO.0003697..single.stranded.DNA.binding	0.127006	1	mtss-1
GO.0004540..ribonuclease.activity	1	1	NA
GO.0090501..RNA.phosphodiester.bond.hydrolysis	1	1	NA
GO.0032077..positive.regulation.of.deoxyribonuclease.activity	1	1	NA
GO.0004531..deoxyribonuclease.II.activity	1	1	NA
GO.0006259..DNA.metabolic.process	1	1	NA
GO.0004817..cysteine.tRNA.ligase.activity	1	1	NA
GO.0006418..tRNA.aminoacylation.for.protein.translation	1	1	NA
GO.0006423..cysteinyl.tRNA.aminoacylation	1	1	NA
GO.0005788..endoplasmic.reticulum.lumen	0.0982953	1	hsp-3
GO.0031581..hemidesmosome.assembly	1	1	NA
GO.0045471..response.to.ethanol	1	1	NA
GO.0009650..UV.protection	1	1	NA
GO.0007079..mitotic.chromosome.movement.towards.spindle.pole	1	1	NA
GO.0007080..mitotic.metaphase.plate.congression	1	1	NA
GO.1990385..meiotic.spindle.midzone	1	1	NA
GO.1990386..mitotic.cleavage.furrow.ingression	1	1	NA
GO.0030536..larval.feeding.behavior	1	1	NA
GO.0048747..muscle.fiber.development	1	1	NA
GO.0008180..COP9.signalosome	1	1	NA
GO.0010388..cullin.deneddylation	1	1	NA
GO.0019784..NEDD8.specific.protease.activity	1	1	NA
GO.0000338..protein.deneddylation	1	1	NA
GO.0017151..DEAD.H.box.RNA.helicase.binding	1	1	NA
GO.0031672..A.band	1	1	NA
GO.0097153..cysteine.type.endopeptidase.activity.involved.in.apoptotic.process	1	1	NA
GO.0042383..sarcolemma	1	1	NA
GO.0055074..calcium.ion.homeostasis	1	1	NA
GO.0009055..electron.carrier.activity	1	1	NA
GO.0022904..respiratory.electron.transport.chain	1	1	NA
GO.0070469..respiratory.chain	1	1	NA
GO.0004096..catalase.activity	1	1	NA
GO.0042542..response.to.hydrogen.peroxide	1	1	NA
GO.0007031..peroxisome.organization	1	1	NA
GO.0007266..Rho.protein.signal.transduction	1	1	NA
GO.0004108..citrate..Si..synthase.activity	1	1	NA
GO.0005759..mitochondrial.matrix	1	1	NA
GO.0006101..citrate.metabolic.process	1	1	NA
GO.0046912..transferase.activity..transferring.acyl.groups..acyl.groups.converted.into.alkyl.on.transfer	1	1	NA
GO.0004008..copper.exporting.ATPase.activity	1	1	NA
GO.0005375..copper.ion.transmembrane.transporter.activity	1	1	NA
GO.0005507..copper.ion.binding	1	1	NA
GO.0005774..vacuolar.membrane	0.0504047	1	vha-1
GO.0005802..trans.Golgi.network	1	1	NA
GO.0006825..copper.ion.transport	1	1	NA
GO.0006878..cellular.copper.ion.homeostasis	1	1	NA
GO.0019829..cation.transporting.ATPase.activity	1	1	NA
GO.0030001..metal.ion.transport	1	1	NA
GO.0060003..copper.ion.export	1	1	NA
GO.0015677..copper.ion.import	1	1	NA
GO.0015680..intracellular.copper.ion.transport	1	1	NA
GO.0016530..metallochaperone.activity	1	1	NA
GO.0016531..copper.chaperone.activity	1	1	NA
GO.0008285..negative.regulation.of.cell.proliferation	1	1	NA
GO.0010826..negative.regulation.of.centrosome.duplication	1	1	NA
GO.0019005..SCF.ubiquitin.ligase.complex	1	1	NA
GO.0031647..regulation.of.protein.stability	1	1	NA
GO.0045930..negative.regulation.of.mitotic.cell.cycle	1	1	NA
GO.0008105..asymmetric.protein.localization	1	1	NA
GO.0019100..male.germ.line.sex.determination	1	1	NA
GO.0019102..male.somatic.sex.determination	1	1	NA
GO.0031461..cullin.RING.ubiquitin.ligase.complex	1	1	NA
GO.0036369..transcription.factor.catabolic.process	1	1	NA
GO.0042078..germ.line.stem.cell.division	1	1	NA
GO.0051232..meiotic.spindle.elongation	1	1	NA
GO.0051759..sister.chromosome.movement.towards.spindle.pole.involved.in.meiotic.sister.chromatid.segregation	1	1	NA
GO.1902104..positive.regulation.of.metaphase.anaphase.transition.of.meiotic.cell.cycle	1	1	NA
GO.0031463..Cul3.RING.ubiquitin.ligase.complex	1	1	NA
GO.0044257..cellular.protein.catabolic.process	1	1	NA
GO.0043161..proteasome.mediated.ubiquitin.dependent.protein.catabolic.process	1	1	NA
GO.0031466..Cul5.RING.ubiquitin.ligase.complex	1	1	NA
GO.0051607..defense.response.to.virus	1	1	NA
GO.0006897..endocytosis	1	1	NA
GO.0051788..response.to.misfolded.protein	1	1	NA
GO.0097038..perinuclear.endoplasmic.reticulum	1	1	NA
GO.0030100..regulation.of.endocytosis	1	1	NA
GO.0030659..cytoplasmic.vesicle.membrane	1	1	NA
GO.0005217..intracellular.ligand.gated.ion.channel.activity	1	1	NA
GO.0007041..lysosomal.transport	1	1	NA
GO.0010877..lipid.transport.involved.in.lipid.storage	1	1	NA
GO.0036019..endolysosome	1	1	NA
GO.0045806..negative.regulation.of.endocytosis	1	1	NA
GO.0005578..proteinaceous.extracellular.matrix	1	1	NA
GO.0030971..receptor.tyrosine.kinase.binding	1	1	NA
GO.0009948..anterior.posterior.axis.specification	1	1	NA
GO.0010084..specification.of.organ.axis.polarity	1	1	NA
GO.0033564..anterior.posterior.axon.guidance	1	1	NA
GO.0060573..cell.fate.specification.involved.in.pattern.specification	1	1	NA
GO.0045859..regulation.of.protein.kinase.activity	1	1	NA
GO.0000070..mitotic.sister.chromatid.segregation	1	1	NA
GO.0000079..regulation.of.cyclin.dependent.protein.serine.threonine.kinase.activity	1	1	NA
GO.0007098..centrosome.cycle	1	1	NA
GO.0010389..regulation.of.G2.M.transition.of.mitotic.cell.cycle	1	1	NA
GO.0045144..meiotic.sister.chromatid.segregation	1	1	NA
GO.0051383..kinetochore.organization	1	1	NA
GO.0051445..regulation.of.meiotic.cell.cycle	1	1	NA
GO.0007506..gonadal.mesoderm.development	1	1	NA
GO.1904787..positive.regulation.of.asymmetric.protein.localization.involved.in.cell.fate.determination	1	1	NA
GO.0005814..centriole	1	1	NA
GO.0007088..regulation.of.mitotic.nuclear.division	1	1	NA
GO.0008284..positive.regulation.of.cell.proliferation	1	1	NA
GO.0010608..posttranscriptional.regulation.of.gene.expression	1	1	NA
GO.0042023..DNA.endoreduplication	1	1	NA
GO.0048815..hermaphrodite.genitalia.morphogenesis	1	1	NA
GO.1904776..regulation.of.protein.localization.to.cell.cortex	1	1	NA
GO.0005826..actomyosin.contractile.ring	1	1	NA
GO.0016043..cellular.component.organization	1	1	NA
GO.0032154..cleavage.furrow	1	1	NA
GO.1902410..mitotic.cytokinetic.process	1	1	NA
GO.1903673..mitotic.cleavage.furrow.formation	1	1	NA
GO.0004843..thiol.dependent.ubiquitin.specific.protease.activity	1	1	NA
GO.0016579..protein.deubiquitination	1	1	NA
GO.0036459..thiol.dependent.ubiquitinyl.hydrolase.activity	1	1	NA
GO.0097149..centralspindlin.complex	1	1	NA
GO.0016853..isomerase.activity	0.0554353	1	cyn-1, cyn-3
GO.0030198..extracellular.matrix.organization	1	1	NA
GO.0005798..Golgi.associated.vesicle	1	1	NA
GO.0030122..AP.2.adaptor.complex	1	1	NA
GO.0030136..clathrin.coated.vesicle	1	1	NA
GO.0031982..vesicle	1	1	NA
GO.0032050..clathrin.heavy.chain.binding	1	1	NA
GO.0004579..dolichyl.diphosphooligosaccharide.protein.glycotransferase.activity	1	1	NA
GO.0008250..oligosaccharyltransferase.complex	1	1	NA
GO.0004675..transmembrane.receptor.protein.serine.threonine.kinase.activity	1	1	NA
GO.0004702..receptor.signaling.protein.serine.threonine.kinase.activity	1	1	NA
GO.0005024..transforming.growth.factor.beta.activated.receptor.activity	1	1	NA
GO.0007178..transmembrane.receptor.protein.serine.threonine.kinase.signaling.pathway	1	1	NA
GO.0007179..transforming.growth.factor.beta.receptor.signaling.pathway	1	1	NA
GO.0023014..signal.transduction.by.protein.phosphorylation	1	1	NA
GO.0061067..negative.regulation.of.dauer.larval.development	1	1	NA
GO.0005009..insulin.activated.receptor.activity	1	1	NA
GO.0010260..organ.senescence	1	1	NA
GO.0010467..gene.expression	1	1	NA
GO.0017046..peptide.hormone.binding	1	1	NA
GO.0040034..regulation.of.development..heterochronic	0.104111	1	lin-28
GO.0042169..SH2.domain.binding	1	1	NA
GO.0042992..negative.regulation.of.transcription.factor.import.into.nucleus	1	1	NA
GO.0043054..dauer.exit	1	1	NA
GO.0051425..PTB.domain.binding	1	1	NA
GO.1901031..regulation.of.response.to.reactive.oxygen.species	1	1	NA
GO.2000785..regulation.of.autophagosome.assembly	1	1	NA
GO.0001158..enhancer.sequence.specific.DNA.binding	1	1	NA
GO.0022604..regulation.of.cell.morphogenesis	1	1	NA
GO.0030509..BMP.signaling.pathway	1	1	NA
GO.0030513..positive.regulation.of.BMP.signaling.pathway	1	1	NA
GO.0030514..negative.regulation.of.BMP.signaling.pathway	1	1	NA
GO.0036122..BMP.binding	1	1	NA
GO.0046332..SMAD.binding	1	1	NA
GO.0008158..hedgehog.receptor.activity	1	1	NA
GO.0009653..anatomical.structure.morphogenesis	1	1	NA
GO.0046626..regulation.of.insulin.receptor.signaling.pathway	1	1	NA
GO.0005125..cytokine.activity	1	1	NA
GO.0005160..transforming.growth.factor.beta.receptor.binding	1	1	NA
GO.0008083..growth.factor.activity	1	1	NA
GO.0010862..positive.regulation.of.pathway.restricted.SMAD.protein.phosphorylation	1	1	NA
GO.0043408..regulation.of.MAPK.cascade	1	1	NA
GO.0048468..cell.development	1	1	NA
GO.0060395..SMAD.protein.signal.transduction	1	1	NA
GO.0043476..pigment.accumulation	1	1	NA
GO.0007267..cell.cell.signaling	1	1	NA
GO.0008202..steroid.metabolic.process	1	1	NA
GO.0008203..cholesterol.metabolic.process	1	1	NA
GO.0008395..steroid.hydroxylase.activity	1	1	NA
GO.0047749..cholestanetriol.26.monooxygenase.activity	1	1	NA
GO.0097500..receptor.localization.to.nonmotile.primary.cilium	1	1	NA
GO.0007168..receptor.guanylyl.cyclase.signaling.pathway	1	1	NA
GO.0007608..sensory.perception.of.smell	1	1	NA
GO.0008074..guanylate.cyclase.complex..soluble	1	1	NA
GO.0019236..response.to.pheromone	1	1	NA
GO.0019932..second.messenger.mediated.signaling	1	1	NA
GO.0030511..positive.regulation.of.transforming.growth.factor.beta.receptor.signaling.pathway	1	1	NA
GO.0004879..RNA.polymerase.II.transcription.factor.activity..ligand.activated.sequence.specific.DNA.binding	1	1	NA
GO.0043401..steroid.hormone.mediated.signaling.pathway	1	1	NA
GO.0031931..TORC1.complex	1	1	NA
GO.0002821..positive.regulation.of.adaptive.immune.response	1	1	NA
GO.0010564..regulation.of.cell.cycle.process	1	1	NA
GO.0033613..activating.transcription.factor.binding	1	1	NA
GO.0034605..cellular.response.to.heat	1	1	NA
GO.0040008..regulation.of.growth	1	1	NA
GO.0040015..negative.regulation.of.multicellular.organism.growth	1	1	NA
GO.0043620..regulation.of.DNA.templated.transcription.in.response.to.stress	1	1	NA
GO.0046890..regulation.of.lipid.biosynthetic.process	1	1	NA
GO.0060537..muscle.tissue.development	1	1	NA
GO.1900426..positive.regulation.of.defense.response.to.bacterium	1	1	NA
GO.1990381..ubiquitin.specific.protease.binding	1	1	NA
GO.0000978..RNA.polymerase.II.core.promoter.proximal.region.sequence.specific.DNA.binding	0.0746564	1	hlh-1
GO.1902855..regulation.of.nonmotile.primary.cilium.assembly	1	1	NA
GO.0006611..protein.export.from.nucleus	1	1	NA
GO.0061077..chaperone.mediated.protein.folding	1	1	NA
GO.0006970..response.to.osmotic.stress	1	1	NA
GO.0010753..positive.regulation.of.cGMP.mediated.signaling	1	1	NA
GO.0097499..protein.localization.to.nonmotile.primary.cilium	1	1	NA
GO.0005158..insulin.receptor.binding	1	1	NA
GO.0005179..hormone.activity	1	1	NA
GO.0042990..regulation.of.transcription.factor.import.into.nucleus	1	1	NA
GO.0004596..peptide.alpha.N.acetyltransferase.activity	1	1	NA
GO.0006474..N.terminal.protein.amino.acid.acetylation	1	1	NA
GO.0006475..internal.protein.amino.acid.acetylation	1	1	NA
GO.0008080..N.acetyltransferase.activity	1	1	NA
GO.0017198..N.terminal.peptidyl.serine.acetylation	1	1	NA
GO.0018002..N.terminal.peptidyl.glutamic.acid.acetylation	1	1	NA
GO.0031415..NatA.complex	1	1	NA
GO.0032504..multicellular.organism.reproduction	1	1	NA
GO.0051091..positive.regulation.of.sequence.specific.DNA.binding.transcription.factor.activity	1	1	NA
GO.1990189..peptide.serine.N.acetyltransferase.activity	1	1	NA
GO.1990190..peptide.glutamate.N.acetyltransferase.activity	1	1	NA
GO.0004488..methylenetetrahydrofolate.dehydrogenase..NADP...activity	1	1	NA
GO.0009396..folic.acid.containing.compound.biosynthetic.process	1	1	NA
GO.0009303..rRNA.transcription	1	1	NA
GO.0005761..mitochondrial.ribosome	1	1	NA
GO.0005763..mitochondrial.small.ribosomal.subunit	1	1	NA
GO.0015935..small.ribosomal.subunit	0.0746564	1	rps-15
GO.0005254..chloride.channel.activity	1	1	NA
GO.0005275..amine.transmembrane.transporter.activity	1	1	NA
GO.0005328..neurotransmitter.sodium.symporter.activity	1	1	NA
GO.0005329..dopamine.transmembrane.transporter.activity	1	1	NA
GO.0005330..dopamine.sodium.symporter.activity	1	1	NA
GO.0006836..neurotransmitter.transport	1	1	NA
GO.0015837..amine.transport	1	1	NA
GO.0030673..axolemma	1	1	NA
GO.0032590..dendrite.membrane	1	1	NA
GO.0042734..presynaptic.membrane	1	1	NA
GO.0051583..dopamine.uptake.involved.in.synaptic.transmission	1	1	NA
GO.0090494..dopamine.uptake	1	1	NA
GO.0045793..positive.regulation.of.cell.size	1	1	NA
GO.0046622..positive.regulation.of.organ.growth	1	1	NA
GO.0070700..BMP.receptor.binding	1	1	NA
GO.0000375..RNA.splicing..via.transesterification.reactions	1	1	NA
GO.0000398..mRNA.splicing..via.spliceosome	1	1	NA
GO.0008419..RNA.lariat.debranching.enzyme.activity	1	1	NA
GO.0016788..hydrolase.activity..acting.on.ester.bonds	1	1	NA
GO.0006306..DNA.methylation	1	1	NA
GO.0016581..NuRD.complex	1	1	NA
GO.0004525..ribonuclease.III.activity	1	1	NA
GO.0004530..deoxyribonuclease.I.activity	1	1	NA
GO.0016442..RISC.complex	1	1	NA
GO.0016891..endoribonuclease.activity..producing.5.phosphomonoesters	1	1	NA
GO.0030422..production.of.siRNA.involved.in.RNA.interference	1	1	NA
GO.0031050..dsRNA.fragmentation	1	1	NA
GO.0031054..pre.miRNA.processing	0.0255246	1	lin-28
GO.2000636..positive.regulation.of.primary.miRNA.processing	1	1	NA
GO.0000288..nuclear.transcribed.mRNA.catabolic.process..deadenylation.dependent.decay	0.0442442	1	ntl-2
GO.0000290..deadenylation.dependent.decapping.of.nuclear.transcribed.mRNA	1	1	NA
GO.0000340..RNA.7.methylguanosine.cap.binding	1	1	NA
GO.0004780..sulfate.adenylyltransferase..ADP..activity	1	1	NA
GO.0006402..mRNA.catabolic.process	1	1	NA
GO.0006790..sulfur.compound.metabolic.process	1	1	NA
GO.0009150..purine.ribonucleotide.metabolic.process	1	1	NA
GO.0047627..adenylylsulfatase.activity	1	1	NA
GO.0050072..m7G.5.pppN.diphosphatase.activity	1	1	NA
GO.0007016..cytoskeletal.anchoring.at.plasma.membrane	1	1	NA
GO.0005272..sodium.channel.activity	1	1	NA
GO.0010447..response.to.acidic.pH	1	1	NA
GO.0035725..sodium.ion.transmembrane.transport	1	1	NA
GO.0043200..response.to.amino.acid	1	1	NA
GO.0043067..regulation.of.programmed.cell.death	1	1	NA
GO.0004143..diacylglycerol.kinase.activity	1	1	NA
GO.0007205..protein.kinase.C.activating.G.protein.coupled.receptor.signaling.pathway	1	1	NA
GO.0007210..serotonin.receptor.signaling.pathway	1	1	NA
GO.0007212..dopamine.receptor.signaling.pathway	1	1	NA
GO.0044297..cell.body	1	1	NA
GO.0046834..lipid.phosphorylation	1	1	NA
GO.0043052..thermotaxis	1	1	NA
GO.0048169..regulation.of.long.term.neuronal.synaptic.plasticity	1	1	NA
GO.0009925..basal.plasma.membrane	1	1	NA
GO.0016010..dystrophin.associated.glycoprotein.complex	1	1	NA
GO.0043236..laminin.binding	1	1	NA
GO.0008090..retrograde.axonal.transport	1	1	NA
GO.0016322..neuron.remodeling	1	1	NA
GO.0035047..centrosomal.and.pronuclear.rotation	1	1	NA
GO.0048814..regulation.of.dendrite.morphogenesis	1	1	NA
GO.0051293..establishment.of.spindle.localization	1	1	NA
GO.1902473..regulation.of.protein.localization.to.synapse	1	1	NA
GO.1990048..anterograde.dense.core.granule.transport	1	1	NA
GO.0004157..dihydropyrimidinase.activity	1	1	NA
GO.0006208..pyrimidine.nucleobase.catabolic.process	1	1	NA
GO.0016812..hydrolase.activity..acting.on.carbon.nitrogen..but.not.peptide..bonds..in.cyclic.amides	1	1	NA
GO.0046113..nucleobase.catabolic.process	1	1	NA
GO.0005811..lipid.particle	1	1	NA
GO.0033555..multicellular.organismal.response.to.stress	1	1	NA
GO.0016229..steroid.dehydrogenase.activity	1	1	NA
GO.0004090..carbonyl.reductase..NADPH..activity	1	1	NA
GO.0005997..xylulose.metabolic.process	1	1	NA
GO.0005998..xylulose.catabolic.process	1	1	NA
GO.0006006..glucose.metabolic.process	1	1	NA
GO.0042732..D.xylose.metabolic.process	1	1	NA
GO.0050038..L.xylulose.reductase..NADP...activity	1	1	NA
GO.0051289..protein.homotetramerization	1	1	NA
GO.0000038..very.long.chain.fatty.acid.metabolic.process	1	1	NA
GO.0006637..acyl.CoA.metabolic.process	1	1	NA
GO.0010888..negative.regulation.of.lipid.storage	1	1	NA
GO.0042811..pheromone.biosynthetic.process	1	1	NA
GO.0048639..positive.regulation.of.developmental.growth	1	1	NA
GO.1904070..ascaroside.biosynthetic.process	1	1	NA
GO.0006839..mitochondrial.transport	1	1	NA
GO.0000175..3.5.exoribonuclease.activity	1	1	NA
GO.0006364..rRNA.processing	1	1	NA
GO.0003887..DNA.directed.DNA.polymerase.activity	1	1	NA
GO.0005658..alpha.DNA.polymerase.primase.complex	1	1	NA
GO.0071897..DNA.biosynthetic.process	1	1	NA
GO.0005875..microtubule.associated.complex	1	1	NA
GO.0004385..guanylate.kinase.activity	1	1	NA
GO.0008328..ionotropic.glutamate.receptor.complex	1	1	NA
GO.0035255..ionotropic.glutamate.receptor.binding	1	1	NA
GO.0043113..receptor.clustering	1	1	NA
GO.0045186..zonula.adherens.assembly	1	1	NA
GO.0045197..establishment.or.maintenance.of.epithelial.cell.apical.basal.polarity	1	1	NA
GO.0046037..GMP.metabolic.process	1	1	NA
GO.0046710..GDP.metabolic.process	1	1	NA
GO.0005868..cytoplasmic.dynein.complex	1	1	NA
GO.0035371..microtubule.plus.end	1	1	NA
GO.0000186..activation.of.MAPKK.activity	1	1	NA
GO.0004709..MAP.kinase.kinase.kinase.activity	1	1	NA
GO.0048677..axon.extension.involved.in.regeneration	1	1	NA
GO.0048689..formation.of.growth.cone.in.injured.axon	1	1	NA
GO.1903616..MAPK.cascade.involved.in.axon.regeneration	1	1	NA
GO.0000014..single.stranded.DNA.endodeoxyribonuclease.activity	1	1	NA
GO.0043141..ATP.dependent.5.3.DNA.helicase.activity	1	1	NA
GO.0043142..single.stranded.DNA.dependent.ATPase.activity	1	1	NA
GO.0007097..nuclear.migration	1	1	NA
GO.0010970..establishment.of.localization.by.movement.along.microtubule	1	1	NA
GO.0045502..dynein.binding	1	1	NA
GO.0045505..dynein.intermediate.chain.binding	1	1	NA
GO.0000242..pericentriolar.material	1	1	NA
GO.0006469..negative.regulation.of.protein.kinase.activity	1	1	NA
GO.0051787..misfolded.protein.binding	1	1	NA
GO.0045454..cell.redox.homeostasis	1	1	NA
GO.0031072..heat.shock.protein.binding	1	1	NA
GO.0007269..neurotransmitter.secretion	1	1	NA
GO.0016226..iron.sulfur.cluster.assembly	1	1	NA
GO.0051259..protein.oligomerization	1	1	NA
GO.0015036..disulfide.oxidoreductase.activity	1	1	NA
GO.0034975..protein.folding.in.endoplasmic.reticulum	1	1	NA
GO.0008026..ATP.dependent.helicase.activity	1	1	NA
GO.0043570..maintenance.of.DNA.repeat.elements	1	1	NA
GO.0090329..regulation.of.DNA.dependent.DNA.replication	1	1	NA
GO.0009794..regulation.of.mitotic.cell.cycle..embryonic	1	1	NA
GO.0001588..dopamine.neurotransmitter.receptor.activity..coupled.via.Gs	1	1	NA
GO.0001963..synaptic.transmission..dopaminergic	1	1	NA
GO.0007191..adenylate.cyclase.activating.dopamine.receptor.signaling.pathway	1	1	NA
GO.0035240..dopamine.binding	1	1	NA
GO.0051379..epinephrine.binding	1	1	NA
GO.0051380..norepinephrine.binding	1	1	NA
GO.0001591..dopamine.neurotransmitter.receptor.activity..coupled.via.Gi.Go	1	1	NA
GO.0060108..annular.furrow.extracellular.matrix	1	1	NA
GO.0003756..protein.disulfide.isomerase.activity	1	1	NA
GO.0015035..protein.disulfide.oxidoreductase.activity	1	1	NA
GO.0034976..response.to.endoplasmic.reticulum.stress	1	1	NA
GO.0004656..procollagen.proline.4.dioxygenase.activity	1	1	NA
GO.0016702..oxidoreductase.activity..acting.on.single.donors.with.incorporation.of.molecular.oxygen..incorporation.of.two.atoms.of.oxygen	1	1	NA
GO.0019511..peptidyl.proline.hydroxylation	1	1	NA
GO.0031418..L.ascorbic.acid.binding	1	1	NA
GO.0031545..peptidyl.proline.4.dioxygenase.activity	1	1	NA
GO.0043412..macromolecule.modification	1	1	NA
GO.0051213..dioxygenase.activity	1	1	NA
GO.0000030..mannosyltransferase.activity	1	1	NA
GO.0005637..nuclear.inner.membrane	1	1	NA
GO.0018406..protein.C.linked.glycosylation.via.2.alpha.mannosyl.L.tryptophan	1	1	NA
GO.0000805..X.chromosome	1	1	NA
GO.0001104..RNA.polymerase.II.transcription.cofactor.activity	1	1	NA
GO.0016592..mediator.complex	1	1	NA
GO.0005905..coated.pit	1	1	NA
GO.0061357..positive.regulation.of.Wnt.protein.secretion	1	1	NA
GO.1990075..periciliary.membrane.compartment	1	1	NA
GO.0042464..dosage.compensation.by.hypoactivation.of.X.chromosome	1	1	NA
GO.0046536..dosage.compensation.complex	1	1	NA
GO.0000799..nuclear.condensin.complex	1	1	NA
GO.0010032..meiotic.chromosome.condensation	1	1	NA
GO.0045128..negative.regulation.of.reciprocal.meiotic.recombination	1	1	NA
GO.0051304..chromosome.separation	1	1	NA
GO.0006348..chromatin.silencing.at.telomere	1	1	NA
GO.0042800..histone.methyltransferase.activity..H3.K4.specific.	1	1	NA
GO.0048188..Set1C.COMPASS.complex	1	1	NA
GO.0051568..histone.H3.K4.methylation	1	1	NA
GO.0000151..ubiquitin.ligase.complex	1	1	NA
GO.0008078..mesodermal.cell.migration	1	1	NA
GO.0000266..mitochondrial.fission	1	1	NA
GO.0008637..apoptotic.mitochondrial.changes	1	1	NA
GO.0004815..aspartate.tRNA.ligase.activity	1	1	NA
GO.0006422..aspartyl.tRNA.aminoacylation	1	1	NA
GO.2000748..positive.regulation.of.defecation.rhythm	1	1	NA
GO.0060069..Wnt.signaling.pathway..regulating.spindle.positioning	1	1	NA
GO.0060071..Wnt.signaling.pathway..planar.cell.polarity.pathway	1	1	NA
GO.0048546..digestive.tract.morphogenesis	1	1	NA
GO.0005277..acetylcholine.transmembrane.transporter.activity	1	1	NA
GO.0007529..establishment.of.synaptic.specificity.at.neuromuscular.junction	1	1	NA
GO.0007626..locomotory.behavior	1	1	NA
GO.0015870..acetylcholine.transport	1	1	NA
GO.0016014..dystrobrevin.complex	1	1	NA
GO.0032224..positive.regulation.of.synaptic.transmission..cholinergic	0.0380442	1	ric-3
GO.0046716..muscle.cell.cellular.homeostasis	1	1	NA
GO.0008307..structural.constituent.of.muscle	1	1	NA
GO.0030235..nitric.oxide.synthase.regulator.activity	1	1	NA
GO.0005879..axonemal.microtubule	1	1	NA
GO.0018095..protein.polyglutamylation	1	1	NA
GO.0060271..cilium.morphogenesis	1	1	NA
GO.0000165..MAPK.cascade	1	1	NA
GO.0004707..MAP.kinase.activity	1	1	NA
GO.0003391..amphid.sensory.organ.dendrite.retrograde.extension	1	1	NA
GO.0043621..protein.self.association	1	1	NA
GO.0006461..protein.complex.assembly	1	1	NA
GO.0055088..lipid.homeostasis	1	1	NA
GO.0031143..pseudopodium	1	1	NA
GO.0090386..phagosome.maturation.involved.in.apoptotic.cell.clearance	1	1	NA
GO.0043056..forward.locomotion	1	1	NA
GO.0045203..integral.component.of.cell.outer.membrane	1	1	NA
GO.0060378..regulation.of.brood.size	1	1	NA
GO.0000303..response.to.superoxide	1	1	NA
GO.0008053..mitochondrial.fusion	1	1	NA
GO.0035264..multicellular.organism.growth	1	1	NA
GO.0006820..anion.transport	1	1	NA
GO.0008344..adult.locomotory.behavior	1	1	NA
GO.0022857..transmembrane.transporter.activity	1	1	NA
GO.0030672..synaptic.vesicle.membrane	1	1	NA
GO.0061096..negative.regulation.of.turning.behavior.involved.in.mating	1	1	NA
GO.0005243..gap.junction.channel.activity	1	1	NA
GO.0055077..gap.junction.hemi.channel.activity	1	1	NA
GO.0005391..sodium.potassium.exchanging.ATPase.activity	1	1	NA
GO.0006813..potassium.ion.transport	1	1	NA
GO.0006883..cellular.sodium.ion.homeostasis	1	1	NA
GO.0006937..regulation.of.muscle.contraction	1	1	NA
GO.0010107..potassium.ion.import	1	1	NA
GO.0010248..establishment.or.maintenance.of.transmembrane.electrochemical.gradient	1	1	NA
GO.0030007..cellular.potassium.ion.homeostasis	1	1	NA
GO.0036376..sodium.ion.export.from.cell	1	1	NA
GO.0005834..heterotrimeric.G.protein.complex	1	1	NA
GO.0008277..regulation.of.G.protein.coupled.receptor.protein.signaling.pathway	1	1	NA
GO.0030845..phospholipase.C.inhibiting.G.protein.coupled.receptor.signaling.pathway	1	1	NA
GO.0043087..regulation.of.GTPase.activity	1	1	NA
GO.0050804..modulation.of.synaptic.transmission	1	1	NA
GO.0022834..ligand.gated.channel.activity	1	1	NA
GO.0045161..neuronal.ion.channel.clustering	1	1	NA
GO.0004084..branched.chain.amino.acid.transaminase.activity	1	1	NA
GO.0008483..transaminase.activity	0.0865515	1	T09B4.8
GO.0008652..cellular.amino.acid.biosynthetic.process	1	1	NA
GO.0009081..branched.chain.amino.acid.metabolic.process	1	1	NA
GO.0009082..branched.chain.amino.acid.biosynthetic.process	1	1	NA
GO.0052654..L.leucine.transaminase.activity	1	1	NA
GO.0052655..L.valine.transaminase.activity	1	1	NA
GO.0052656..L.isoleucine.transaminase.activity	1	1	NA
GO.0003857..3.hydroxyacyl.CoA.dehydrogenase.activity	1	1	NA
GO.0004300..enoyl.CoA.hydratase.activity	1	1	NA
GO.0006635..fatty.acid.beta.oxidation	1	1	NA
GO.0016507..mitochondrial.fatty.acid.beta.oxidation.multienzyme.complex	1	1	NA
GO.0000768..syncytium.formation.by.plasma.membrane.fusion	1	1	NA
GO.0044291..cell.cell.contact.zone	1	1	NA
GO.0090597..nematode.male.tail.mating.organ.morphogenesis	1	1	NA
GO.0004686..elongation.factor.2.kinase.activity	1	1	NA
GO.0048557..embryonic.digestive.tract.morphogenesis	1	1	NA
GO.0046875..ephrin.receptor.binding	1	1	NA
GO.0048013..ephrin.receptor.signaling.pathway	1	1	NA
GO.0060280..negative.regulation.of.ovulation	1	1	NA
GO.0031225..anchored.component.of.membrane	1	1	NA
GO.0042074..cell.migration.involved.in.gastrulation	1	1	NA
GO.0032091..negative.regulation.of.protein.binding	1	1	NA
GO.0005267..potassium.channel.activity	1	1	NA
GO.0006936..muscle.contraction	0.0982953	1	tni-1
GO.0031528..microvillus.membrane	1	1	NA
GO.0030070..insulin.processing	1	1	NA
GO.0090325..regulation.of.locomotion.involved.in.locomotory.behavior	1	1	NA
GO.0004692..cGMP.dependent.protein.kinase.activity	1	1	NA
GO.0030308..negative.regulation.of.cell.growth	1	1	NA
GO.0046621..negative.regulation.of.organ.growth	1	1	NA
GO.0051343..positive.regulation.of.cyclic.nucleotide.phosphodiesterase.activity	1	1	NA
GO.1902160..negative.regulation.of.cyclic.nucleotide.gated.ion.channel.activity	1	1	NA
GO.0004435..phosphatidylinositol.phospholipase.C.activity	1	1	NA
GO.0007320..insemination	1	1	NA
GO.0016042..lipid.catabolic.process	1	1	NA
GO.0034609..spicule.insertion	1	1	NA
GO.0018401..peptidyl.proline.hydroxylation.to.4.hydroxy.L.proline	1	1	NA
GO.0007622..rhythmic.behavior	1	1	NA
GO.0009968..negative.regulation.of.signal.transduction	1	1	NA
GO.0048664..neuron.fate.determination	1	1	NA
GO.0005104..fibroblast.growth.factor.receptor.binding	1	1	NA
GO.0008543..fibroblast.growth.factor.receptor.signaling.pathway	1	1	NA
GO.0061025..membrane.fusion	1	1	NA
GO.0035545..determination.of.left.right.asymmetry.in.nervous.system	1	1	NA
GO.0004180..carboxypeptidase.activity	1	1	NA
GO.0004181..metallocarboxypeptidase.activity	1	1	NA
GO.0004185..serine.type.carboxypeptidase.activity	1	1	NA
GO.0006518..peptide.metabolic.process	1	1	NA
GO.0014055..acetylcholine.secretion..neurotransmission	1	1	NA
GO.0022841..potassium.ion.leak.channel.activity	1	1	NA
GO.0030322..stabilization.of.membrane.potential	1	1	NA
GO.0001664..G.protein.coupled.receptor.binding	1	1	NA
GO.0019001..guanyl.nucleotide.binding	1	1	NA
GO.0031683..G.protein.beta.gamma.subunit.complex.binding	1	1	NA
GO.0060158..phospholipase.C.activating.dopamine.receptor.signaling.pathway	1	1	NA
GO.1902474..positive.regulation.of.protein.localization.to.synapse	1	1	NA
GO.0005251..delayed.rectifier.potassium.channel.activity	1	1	NA
GO.0008076..voltage.gated.potassium.channel.complex	1	1	NA
GO.0051260..protein.homooligomerization	1	1	NA
GO.0060065..uterus.development	1	1	NA
GO.0031536..positive.regulation.of.exit.from.mitosis	1	1	NA
GO.0035329..hippo.signaling	1	1	NA
GO.0048675..axon.extension	1	1	NA
GO.0001731..formation.of.translation.preinitiation.complex	0.080623	1	eif-3.E
GO.0003743..translation.initiation.factor.activity	0.228093	1	eif-3.E
GO.0005852..eukaryotic.translation.initiation.factor.3.complex	0.0982953	1	eif-3.E
GO.0006413..translational.initiation	0.242959	1	eif-3.E
GO.0006446..regulation.of.translational.initiation	0.080623	1	eif-3.E
GO.0016282..eukaryotic.43S.preinitiation.complex	0.0746564	1	eif-3.E
GO.0033290..eukaryotic.48S.preinitiation.complex	0.080623	1	eif-3.E
GO.0045182..translation.regulator.activity	1	1	NA
GO.0055057..neuroblast.division	1	1	NA
GO.0050909..sensory.perception.of.taste	1	1	NA
GO.0001172..transcription..RNA.templated	1	1	NA
GO.0003968..RNA.directed.RNA.polymerase.activity	1	1	NA
GO.0031081..nuclear.pore.distribution	1	1	NA
GO.0070090..metaphase.plate	1	1	NA
GO.0043162..ubiquitin.dependent.protein.catabolic.process.via.the.multivesicular.body.sorting.pathway	1	1	NA
GO.1903361..protein.localization.to.basolateral.plasma.membrane	1	1	NA
GO.0048488..synaptic.vesicle.endocytosis	1	1	NA
GO.0031369..translation.initiation.factor.binding	1	1	NA
GO.0071541..eukaryotic.translation.initiation.factor.3.complex..eIF3m	1	1	NA
GO.0042254..ribosome.biogenesis	1	1	NA
GO.0042256..mature.ribosome.assembly	1	1	NA
GO.0042273..ribosomal.large.subunit.biogenesis	0.0686515	1	rpl-14
GO.0043023..ribosomal.large.subunit.binding	1	1	NA
GO.0006368..transcription.elongation.from.RNA.polymerase.II.promoter	1	1	NA
GO.0030891..VCB.complex	1	1	NA
GO.0031462..Cul2.RING.ubiquitin.ligase.complex	1	1	NA
GO.0070449..elongin.complex	1	1	NA
GO.0032968..positive.regulation.of.transcription.elongation.from.RNA.polymerase.II.promoter	1	1	NA
GO.0006636..unsaturated.fatty.acid.biosynthetic.process	1	1	NA
GO.0001162..RNA.polymerase.II.intronic.transcription.regulatory.region.sequence.specific.DNA.binding	1	1	NA
GO.0007507..heart.development	1	1	NA
GO.0009887..organ.morphogenesis	1	1	NA
GO.0048565..digestive.tract.development	1	1	NA
GO.0048646..anatomical.structure.formation.involved.in.morphogenesis	1	1	NA
GO.0003705..transcription.factor.activity..RNA.polymerase.II.distal.enhancer.sequence.specific.binding	0.0504047	1	hlh-1
GO.0007586..digestion	1	1	NA
GO.0030856..regulation.of.epithelial.cell.differentiation	1	1	NA
GO.1902097..positive.regulation.of.transcription.from.RNA.polymerase.II.promoter.involved.in.defense.response.to.Gram.negative.bacterium	1	1	NA
GO.0000983..transcription.factor.activity..RNA.polymerase.II.core.promoter.sequence.specific	1	1	NA
GO.0061404..positive.regulation.of.transcription.from.RNA.polymerase.II.promoter.in.response.to.increased.salt	1	1	NA
GO.1901244..positive.regulation.of.transcription.from.RNA.polymerase.II.promoter.involved.in.defense.response.to.fungus	1	1	NA
GO.0005681..spliceosomal.complex	1	1	NA
GO.0032784..regulation.of.DNA.templated.transcription..elongation	1	1	NA
GO.0003958..NADPH.hemoprotein.reductase.activity	1	1	NA
GO.0010181..FMN.binding	1	1	NA
GO.0030586...methionine.synthase..reductase.activity	1	1	NA
GO.0005201..extracellular.matrix.structural.constituent	1	1	NA
GO.0050714..positive.regulation.of.protein.secretion	1	1	NA
GO.0007091..metaphase.anaphase.transition.of.mitotic.cell.cycle	1	1	NA
GO.0030071..regulation.of.mitotic.metaphase.anaphase.transition	1	1	NA
GO.0031145..anaphase.promoting.complex.dependent.catabolic.process	1	1	NA
GO.0005521..lamin.binding	1	1	NA
GO.0005639..integral.component.of.nuclear.inner.membrane	1	1	NA
GO.0007493..endodermal.cell.fate.determination	1	1	NA
GO.0005337..nucleoside.transmembrane.transporter.activity	1	1	NA
GO.1901642..nucleoside.transmembrane.transport	1	1	NA
GO.0051402..neuron.apoptotic.process	1	1	NA
GO.0007231..osmosensory.signaling.pathway	1	1	NA
GO.0005034..osmosensor.activity	1	1	NA
GO.0007414..axonal.defasciculation	1	1	NA
GO.0010950..positive.regulation.of.endopeptidase.activity	1	1	NA
GO.0071711..basement.membrane.organization	1	1	NA
GO.0032009..early.phagosome	1	1	NA
GO.0005903..brush.border	1	1	NA
GO.0030056..hemidesmosome	1	1	NA
GO.0045109..intermediate.filament.organization	1	1	NA
GO.0045185..maintenance.of.protein.location	1	1	NA
GO.0048730..epidermis.morphogenesis	1	1	NA
GO.0051017..actin.filament.bundle.assembly	1	1	NA
GO.0006621..protein.retention.in.ER.lumen	1	1	NA
GO.0046923..ER.retention.sequence.binding	1	1	NA
GO.0000467..exonucleolytic.trimming.to.generate.mature.3.end.of.5.8S.rRNA.from.tricistronic.rRNA.transcript..SSU.rRNA..5.8S.rRNA..LSU.rRNA.	1	1	NA
GO.1900369..negative.regulation.of.RNA.interference	1	1	NA
GO.0019898..extrinsic.component.of.membrane	0.0982953	1	epg-6
GO.0031941..filamentous.actin	1	1	NA
GO.0031974..membrane.enclosed.lumen	1	1	NA
GO.0045179..apical.cortex	1	1	NA
GO.0016671..oxidoreductase.activity..acting.on.a.sulfur.group.of.donors..disulfide.as.acceptor	1	1	NA
GO.0004819..glutamine.tRNA.ligase.activity	1	1	NA
GO.0006425..glutaminyl.tRNA.aminoacylation	1	1	NA
GO.0004818..glutamate.tRNA.ligase.activity	1	1	NA
GO.0006424..glutamyl.tRNA.aminoacylation	1	1	NA
GO.0019013..viral.nucleocapsid	1	1	NA
GO.0000982..transcription.factor.activity..RNA.polymerase.II.core.promoter.proximal.region.sequence.specific.binding	1	1	NA
GO.0060142..regulation.of.syncytium.formation.by.plasma.membrane.fusion	0.0255246	1	vha-1
GO.0007064..mitotic.sister.chromatid.cohesion	1	1	NA
GO.0005818..aster	1	1	NA
GO.0030540..female.genitalia.development	1	1	NA
GO.0043622..cortical.microtubule.organization	1	1	NA
GO.0002064..epithelial.cell.development	1	1	NA
GO.0035150..regulation.of.tube.size	1	1	NA
GO.0004364..glutathione.transferase.activity	0.132638	1	gst-5
GO.0006749..glutathione.metabolic.process	1	1	NA
GO.0034707..chloride.channel.complex	1	1	NA
GO.0005089..Rho.guanyl.nucleotide.exchange.factor.activity	1	1	NA
GO.0035023..regulation.of.Rho.protein.signal.transduction	1	1	NA
GO.1904531..positive.regulation.of.actin.filament.binding	1	1	NA
GO.0000381..regulation.of.alternative.mRNA.splicing..via.spliceosome	1	1	NA
GO.0036195..muscle.cell.projection.membrane	1	1	NA
GO.0016917..GABA.receptor.activity	1	1	NA
GO.0045933..positive.regulation.of.muscle.contraction	1	1	NA
GO.0005242..inward.rectifier.potassium.channel.activity	1	1	NA
GO.0048729..tissue.morphogenesis	1	1	NA
GO.0008289..lipid.binding	0.281232	1	C06G1.1
GO.0005504..fatty.acid.binding	1	1	NA
GO.0019841..retinol.binding	1	1	NA
GO.0070538..oleic.acid.binding	1	1	NA
GO.0042389..omega.3.fatty.acid.desaturase.activity	1	1	NA
GO.0004768..stearoyl.CoA.9.desaturase.activity	1	1	NA
GO.0016717..oxidoreductase.activity..acting.on.paired.donors..with.oxidation.of.a.pair.of.donors.resulting.in.the.reduction.of.molecular.oxygen.to.two.molecules.of.water	1	1	NA
GO.0016720..delta12.fatty.acid.dehydrogenase.activity	1	1	NA
GO.0030497..fatty.acid.elongation	1	1	NA
GO.0001820..serotonin.secretion	1	1	NA
GO.0032456..endocytic.recycling	1	1	NA
GO.0045088..regulation.of.innate.immune.response	1	1	NA
GO.0042759..long.chain.fatty.acid.biosynthetic.process	1	1	NA
GO.0003707..steroid.hormone.receptor.activity	1	1	NA
GO.0043059..regulation.of.forward.locomotion	1	1	NA
GO.0042006..masculinization.of.hermaphroditic.germ.line	1	1	NA
GO.0005605..basal.lamina	1	1	NA
GO.0016504..peptidase.activator.activity	1	1	NA
GO.0042132..fructose.1.6.bisphosphate.1.phosphatase.activity	1	1	NA
GO.0042578..phosphoric.ester.hydrolase.activity	1	1	NA
GO.0071586..CAAX.box.protein.processing	1	1	NA
GO.0001540..beta.amyloid.binding	1	1	NA
GO.0030238..male.sex.determination	1	1	NA
GO.0033192..calmodulin.dependent.protein.phosphatase.activity	1	1	NA
GO.0035970..peptidyl.threonine.dephosphorylation	1	1	NA
GO.0043280..positive.regulation.of.cysteine.type.endopeptidase.activity.involved.in.apoptotic.process	1	1	NA
GO.0005544..calcium.dependent.phospholipid.binding	1	1	NA
GO.0007009..plasma.membrane.organization	1	1	NA
GO.0030317..sperm.motility	1	1	NA
GO.0031268..pseudopodium.organization	1	1	NA
GO.0000494..box.C.D.snoRNA.3.end.processing	1	1	NA
GO.0008033..tRNA.processing	1	1	NA
GO.0008649..rRNA.methyltransferase.activity	1	1	NA
GO.0015030..Cajal.body	1	1	NA
GO.0031167..rRNA.methylation	1	1	NA
GO.0031428..box.C.D.snoRNP.complex	1	1	NA
GO.0032040..small.subunit.processome	1	1	NA
GO.0045727..positive.regulation.of.translation	0.0442442	1	unc-62
GO.1990258..histone.glutamine.methylation	1	1	NA
GO.1990259..histone.glutamine.methyltransferase.activity	1	1	NA
GO.0005528..FK506.binding	1	1	NA
GO.0051879..Hsp90.protein.binding	0.0192045	1	sti-1
GO.0051014..actin.filament.severing	1	1	NA
GO.0005184..neuropeptide.hormone.activity	1	1	NA
GO.0071855..neuropeptide.receptor.binding	1	1	NA
GO.0045759..negative.regulation.of.action.potential	1	1	NA
GO.0042165..neurotransmitter.binding	1	1	NA
GO.0045988..negative.regulation.of.striated.muscle.contraction	1	1	NA
GO.0031841..neuropeptide.Y.receptor.binding	1	1	NA
GO.1904068..G.protein.coupled.receptor.signaling.pathway.involved.in.social.behavior	1	1	NA
GO.0007624..ultradian.rhythm	1	1	NA
GO.0007346..regulation.of.mitotic.cell.cycle	1	1	NA
GO.0031098..stress.activated.protein.kinase.signaling.cascade	1	1	NA
GO.0032147..activation.of.protein.kinase.activity	1	1	NA
GO.0048511..rhythmic.process	1	1	NA
GO.1902617..response.to.fluoride	1	1	NA
GO.0004499..N.N.dimethylaniline.monooxygenase.activity	1	1	NA
GO.0050661..NADP.binding	1	1	NA
GO.0018992..germ.line.sex.determination	1	1	NA
GO.0030371..translation.repressor.activity	1	1	NA
GO.0040021..hermaphrodite.germ.line.sex.determination	1	1	NA
GO.0008143..poly.A..binding	1	1	NA
GO.0008266..poly.U..RNA.binding	1	1	NA
GO.0034046..poly.G..binding	1	1	NA
GO.0016651..oxidoreductase.activity..acting.on.NAD.P.H	1	1	NA
GO.0004322..ferroxidase.activity	1	1	NA
GO.0006783..heme.biosynthetic.process	1	1	NA
GO.0008199..ferric.iron.binding	1	1	NA
GO.0055072..iron.ion.homeostasis	1	1	NA
GO.0045604..regulation.of.epidermal.cell.differentiation	1	1	NA
GO.0004826..phenylalanine.tRNA.ligase.activity	1	1	NA
GO.0006432..phenylalanyl.tRNA.aminoacylation	1	1	NA
GO.0009328..phenylalanine.tRNA.ligase.complex	1	1	NA
GO.0000287..magnesium.ion.binding	1	1	NA
GO.0048681..negative.regulation.of.axon.regeneration	1	1	NA
GO.0006826..iron.ion.transport	1	1	NA
GO.0042308..negative.regulation.of.protein.import.into.nucleus	1	1	NA
GO.0004333..fumarate.hydratase.activity	1	1	NA
GO.0006106..fumarate.metabolic.process	1	1	NA
GO.0006108..malate.metabolic.process	1	1	NA
GO.0045239..tricarboxylic.acid.cycle.enzyme.complex	1	1	NA
GO.0051262..protein.tetramerization	1	1	NA
GO.0008417..fucosyltransferase.activity	1	1	NA
GO.0032580..Golgi.cisterna.membrane	1	1	NA
GO.0036065..fucosylation	1	1	NA
GO.0046920..alpha..1..3..fucosyltransferase.activity	1	1	NA
GO.0008107..galactoside.2.alpha.L.fucosyltransferase.activity	1	1	NA
GO.0043413..macromolecule.glycosylation	1	1	NA
GO.0006487..protein.N.linked.glycosylation	1	1	NA
GO.0008424..glycoprotein.6.alpha.L.fucosyltransferase.activity	1	1	NA
GO.0033578..protein.glycosylation.in.Golgi	1	1	NA
GO.0036071..N.glycan.fucosylation	1	1	NA
GO.0046921..alpha..1..6..fucosyltransferase.activity	1	1	NA
GO.0004890..GABA.A.receptor.activity	1	1	NA
GO.1902711..GABA.A.receptor.complex	1	1	NA
GO.0031235..intrinsic.component.of.the.cytoplasmic.side.of.the.plasma.membrane	1	1	NA
GO.0007213..G.protein.coupled.acetylcholine.receptor.signaling.pathway	1	1	NA
GO.0016907..G.protein.coupled.acetylcholine.receptor.activity	1	1	NA
GO.0007197..adenylate.cyclase.inhibiting.G.protein.coupled.acetylcholine.receptor.signaling.pathway	1	1	NA
GO.0007207..phospholipase.C.activating.G.protein.coupled.acetylcholine.receptor.signaling.pathway	1	1	NA
GO.0003954..NADH.dehydrogenase.activity	1	1	NA
GO.0006120..mitochondrial.electron.transport..NADH.to.ubiquinone	1	1	NA
GO.0008137..NADH.dehydrogenase..ubiquinone..activity	1	1	NA
GO.0048038..quinone.binding	1	1	NA
GO.0051287..NAD.binding	1	1	NA
GO.0008336..gamma.butyrobetaine.dioxygenase.activity	1	1	NA
GO.0016706..oxidoreductase.activity..acting.on.paired.donors..with.incorporation.or.reduction.of.molecular.oxygen..2.oxoglutarate.as.one.donor..and.incorporation.of.one.atom.each.of.oxygen.into.both.donors	1	1	NA
GO.0045329..carnitine.biosynthetic.process	1	1	NA
GO.0050353..trimethyllysine.dioxygenase.activity	1	1	NA
[truncated: 3,319 more rows]

## Sheet: N3MvF3M-F3Mup-withCEH18peak
	p.values	FDR.BH	genes
GO.0040011..locomotion	9.4958e-06	0.0504986	soap-1, plrg-1, lsy-2, pccb-1, sec-3, gex-3, pqn-85, mdt-26, aakg-5, dyb-1, lin-59, bet-1, unc-14, jph-1, sin-3, lin-41, cel-1, W04A4.5, emb-8, rfp-1, zfp-1
GO.0005623..cell	1	1	NA
GO.0005942..phosphatidylinositol.3.kinase.complex	1	1	NA
GO.0008286..insulin.receptor.signaling.pathway	1	1	NA
GO.0008340..determination.of.adult.lifespan	0.0515807	1	folt-1, acs-17, mdt-26, aka-1, lin-59, F28B3.5, wdr-23, cel-1, aldo-1
GO.0016301..kinase.activity	0.00834612	1	ppk-3, aka-1, aakg-5, rskn-2, prk-1, cdk-5
GO.0016310..phosphorylation	0.0103923	1	ppk-3, aka-1, aakg-5, rskn-2, prk-1, cdk-5
GO.0019901..protein.kinase.binding	0.226533	1	unc-14
GO.0035014..phosphatidylinositol.3.kinase.regulator.activity	1	1	NA
GO.0040024..dauer.larval.development	1	1	NA
GO.0043551..regulation.of.phosphatidylinositol.3.kinase.activity	1	1	NA
GO.0046854..phosphatidylinositol.phosphorylation	0.0763538	1	ppk-3
GO.0046935..1.phosphatidylinositol.3.kinase.regulator.activity	1	1	NA
GO.0003333..amino.acid.transmembrane.transport	1	1	NA
GO.0005886..plasma.membrane	0.510442	1	sec-3, dyb-1, jph-1
GO.0015171..amino.acid.transmembrane.transporter.activity	1	1	NA
GO.0015179..L.amino.acid.transmembrane.transporter.activity	1	1	NA
GO.0015297..antiporter.activity	1	1	NA
GO.0015807..L.amino.acid.transport	1	1	NA
GO.0016020..membrane	0.958725	1	folt-1, twk-24, acs-17, M60.6, R07E3.4, hst-2, acl-1, T26A8.1, rom-4, snx-13, C47G2.4, F28B3.5, jph-1, ZK858.6, emb-8
GO.0016021..integral.component.of.membrane	0.918409	1	folt-1, twk-24, acs-17, M60.6, R07E3.4, hst-2, acl-1, T26A8.1, rom-4, snx-13, C47G2.4, F28B3.5, jph-1, ZK858.6, emb-8
GO.1902475..L.alpha.amino.acid.transmembrane.transport	1	1	NA
GO.1990184..amino.acid.transport.complex	1	1	NA
GO.0019915..lipid.storage	0.153502	1	nhr-66, ztf-27, hsr-9, cel-1, W04A4.5
GO.0008406..gonad.development	0.322474	1	ify-1, xnp-1, lin-41
GO.0009986..cell.surface	1	1	NA
GO.0000003..reproduction	0.103664	1	plrg-1, folt-1, lsy-2, C02B10.5, gex-3, ify-1, lin-59, bet-1, xnp-1, lin-41, hsr-9, cel-1, W04A4.5, emb-8, rfp-1, zfp-1, cdk-5
GO.0000278..mitotic.cell.cycle	1	1	NA
GO.0002119..nematode.larval.development	0.0411006	1	soap-1, plrg-1, lsy-2, nhr-66, gex-3, mdt-26, aka-1, lin-59, bet-1, rskn-2, lin-41, hsr-9, cel-1, W04A4.5, emb-8, rfp-1, zfp-1
GO.0009792..embryo.development.ending.in.birth.or.egg.hatching	0.00315606	1	plrg-1, lsy-2, sec-3, acs-17, C25A11.2, C02B10.5, nhr-66, gex-3, efa-6, pqn-85, ify-1, mdt-26, farl-11, aakg-5, ztf-27, W02B8.2, lin-59, bet-1, xnp-1, rskn-2, sin-3, cel-1, W04A4.5, sax-2, emb-8, rfp-1, zfp-1, cdk-5
GO.0040025..vulval.development	0.0274855	1	xnp-1, sin-3, rfp-1
GO.0040026..positive.regulation.of.vulval.development	1	1	NA
GO.0040035..hermaphrodite.genitalia.development	0.0248377	1	lsy-2, gex-3, ify-1, aakg-5, xnp-1, hsr-9, W04A4.5, rfp-1, zfp-1
GO.0005576..extracellular.region	1	1	NA
GO.0098542..defense.response.to.other.organism	1	1	NA
GO.0003674..molecular_function	0.0686694	1	soap-1, ric-7, lin-41
GO.0006952..defense.response	1	1	NA
GO.0031640..killing.of.cells.of.other.organism	1	1	NA
GO.0042742..defense.response.to.bacterium	1	1	NA
GO.0050829..defense.response.to.Gram.negative.bacterium	1	1	NA
GO.0050830..defense.response.to.Gram.positive.bacterium	1	1	NA
GO.0050832..defense.response.to.fungus	1	1	NA
GO.0000077..DNA.damage.checkpoint	0.0534955	1	hsr-9
GO.0000166..nucleotide.binding	0.652549	1	xnp-1, rskn-2, cel-1, prk-1, cdk-5
GO.0004672..protein.kinase.activity	0.112333	1	W07G4.3, rskn-2, prk-1, cdk-5
GO.0004713..protein.tyrosine.kinase.activity	1	1	NA
GO.0004715..non.membrane.spanning.protein.tyrosine.kinase.activity	1	1	NA
GO.0005102..receptor.binding	0.240618	1	bra-1
GO.0005515..protein.binding	0.0185781	1	rme-4, bra-1, gex-3, ify-1, ztf-17, dyb-1, bet-1, unc-14, wdr-23, sin-3, rfp-1
GO.0005524..ATP.binding	0.316862	1	W07G4.3, ppk-3, xnp-1, rskn-2, prk-1, cdk-5
GO.0005737..cytoplasm	0.08977	1	ppk-3, rbg-1, gex-3, ify-1, ldh-1, dyb-1, wdr-23, rskn-2, lin-41, prk-1, cdk-5
GO.0006468..protein.phosphorylation	0.136352	1	W07G4.3, rskn-2, prk-1, cdk-5
GO.0006915..apoptotic.process	0.13386	1	ify-1, xnp-1, lin-41, W04A4.5, rfp-1
GO.0007169..transmembrane.receptor.protein.tyrosine.kinase.signaling.pathway	1	1	NA
GO.0007283..spermatogenesis	1	1	NA
GO.0010212..response.to.ionizing.radiation	1	1	NA
GO.0016740..transferase.activity	0.237198	1	hst-2, acl-1, lin-59, rskn-2, cel-1, cdk-5
GO.0030154..cell.differentiation	1	1	NA
GO.0030336..negative.regulation.of.cell.migration	0.024135	1	srgp-1
GO.0031234..extrinsic.component.of.cytoplasmic.side.of.plasma.membrane	1	1	NA
GO.0038083..peptidyl.tyrosine.autophosphorylation	1	1	NA
GO.0042127..regulation.of.cell.proliferation	1	1	NA
GO.0043066..negative.regulation.of.apoptotic.process	1	1	NA
GO.0043518..negative.regulation.of.DNA.damage.response..signal.transduction.by.p53.class.mediator	1	1	NA
GO.0045087..innate.immune.response	1	1	NA
GO.1901075..negative.regulation.of.engulfment.of.apoptotic.cell	1	1	NA
GO.0005215..transporter.activity	0.454862	1	R07E3.4
GO.0006810..transport	0.608723	1	folt-1, twk-24, sec-3, R07E3.4
GO.0006869..lipid.transport	1	1	NA
GO.0008152..metabolic.process	0.338505	1	dhs-17, pccb-1, acs-17, acl-1, acs-13, pcaf-1, cel-1
GO.0016246..RNA.interference	0.0547532	1	sin-3, W04A4.5, zfp-1
GO.0016887..ATPase.activity	1	1	NA
GO.0042626..ATPase.activity..coupled.to.transmembrane.movement.of.substances	1	1	NA
GO.0043231..intracellular.membrane.bounded.organelle	1	1	NA
GO.0055085..transmembrane.transport	0.651097	1	folt-1, R07E3.4
GO.0040020..regulation.of.meiotic.nuclear.division	1	1	NA
GO.0030176..integral.component.of.endoplasmic.reticulum.membrane	1	1	NA
GO.0030968..endoplasmic.reticulum.unfolded.protein.response	1	1	NA
GO.0060465..pharynx.development	1	1	NA
GO.0001507..acetylcholine.catabolic.process.in.synaptic.cleft	1	1	NA
GO.0003990..acetylcholinesterase.activity	1	1	NA
GO.0004104..cholinesterase.activity	1	1	NA
GO.0005615..extracellular.space	1	1	NA
GO.0006581..acetylcholine.catabolic.process	1	1	NA
GO.0016787..hydrolase.activity	0.783832	1	rom-4, xnp-1, cel-1
GO.0030054..cell.junction	0.541178	1	gex-3
GO.0040012..regulation.of.locomotion	1	1	NA
GO.0042135..neurotransmitter.catabolic.process	1	1	NA
GO.0042802..identical.protein.binding	0.307326	1	aldo-1
GO.0043083..synaptic.cleft	1	1	NA
GO.0045202..synapse	0.148756	1	ric-7, cdk-5
GO.0052689..carboxylic.ester.hydrolase.activity	1	1	NA
GO.0007271..synaptic.transmission..cholinergic	0.298778	1	dyb-1
GO.0042803..protein.homodimerization.activity	1	1	NA
GO.0035188..hatching	0.268031	1	ify-1
GO.0043058..regulation.of.backward.locomotion	1	1	NA
GO.0046983..protein.dimerization.activity	1	1	NA
GO.0050879..multicellular.organismal.movement	1	1	NA
GO.0006508..proteolysis	0.83909	1	rom-4
GO.0008237..metallopeptidase.activity	1	1	NA
GO.0008241..peptidyl.dipeptidase.activity	1	1	NA
GO.0018991..oviposition	0.0392869	1	hst-2, gex-3, lin-59, wdr-23, lin-41
GO.0018996..molting.cycle..collagen.and.cuticulin.based.cuticle	0.0765758	1	plrg-1, pccb-1, lin-41, cel-1
GO.0040018..positive.regulation.of.multicellular.organism.growth	0.0471052	1	pccb-1, hst-2, unc-14, wdr-23, lin-41
GO.0003723..RNA.binding	1	1	NA
GO.0003994..aconitate.hydratase.activity	1	1	NA
GO.0005829..cytosol	0.645946	1	cyld-1
GO.0006099..tricarboxylic.acid.cycle	1	1	NA
GO.0006879..cellular.iron.ion.homeostasis	1	1	NA
GO.0016829..lyase.activity	0.356494	1	aldo-1
GO.0046872..metal.ion.binding	0.0230449	1	ppk-3, bra-1, nhr-48, nhr-66, aka-1, W02B8.2, dyb-1, lin-59, C36B1.9, lin-41, rfp-1, zfp-1, cdk-5
GO.0051536..iron.sulfur.cluster.binding	1	1	NA
GO.0051539..4.iron..4.sulfur.cluster.binding	1	1	NA
GO.0072350..tricarboxylic.acid.metabolic.process	1	1	NA
GO.0005739..mitochondrion	0.384192	1	ric-7, fecl-1, wdr-23
GO.0004889..acetylcholine.activated.cation.selective.channel.activity	1	1	NA
GO.0005216..ion.channel.activity	1	1	NA
GO.0005230..extracellular.ligand.gated.ion.channel.activity	1	1	NA
GO.0005231..excitatory.extracellular.ligand.gated.ion.channel.activity	1	1	NA
GO.0005622..intracellular	0.0634897	1	F46H5.4, rme-4, W02B8.2, lin-41, cel-1
GO.0005892..acetylcholine.gated.channel.complex	1	1	NA
GO.0006811..ion.transport	0.826588	1	twk-24
GO.0007274..neuromuscular.synaptic.transmission	1	1	NA
GO.0015464..acetylcholine.receptor.activity	1	1	NA
GO.0035094..response.to.nicotine	1	1	NA
GO.0042166..acetylcholine.binding	1	1	NA
GO.0043005..neuron.projection	0.332357	1	unc-14
GO.0045211..postsynaptic.membrane	1	1	NA
GO.0051932..synaptic.transmission..GABAergic	0.0763538	1	cdk-5
GO.0098655..cation.transmembrane.transport	1	1	NA
GO.0098662..inorganic.cation.transmembrane.transport	1	1	NA
GO.0098703..calcium.ion.import.across.plasma.membrane	1	1	NA
GO.0034220..ion.transmembrane.transport	1	1	NA
GO.0007268..chemical.synaptic.transmission	0.109622	1	cdk-5
GO.0042995..cell.projection	0.364346	1	cdk-5
GO.0000281..mitotic.cytokinesis	1	1	NA
GO.0000910..cytokinesis	1	1	NA
GO.0005200..structural.constituent.of.cytoskeleton	1	1	NA
GO.0005856..cytoskeleton	1	1	NA
GO.0006898..receptor.mediated.endocytosis	0.115981	1	soap-1, gex-3, ify-1, mdt-26, lin-59, lin-41, cel-1
GO.0007517..muscle.organ.development	1	1	NA
GO.0030036..actin.cytoskeleton.organization	1	1	NA
GO.0030866..cortical.actin.cytoskeleton.organization	1	1	NA
GO.0040007..growth	0.621047	1	emb-8
GO.0040039..inductive.cell.migration	0.563256	1	gex-3
GO.0071688..striated.muscle.myosin.thick.filament.assembly	0.0501506	1	ric-7, pqn-85, ztf-17
GO.0005884..actin.filament	1	1	NA
GO.0005938..cell.cortex	0.0127834	1	srgp-1, efa-6, sax-2
GO.0007111..meiosis.II.cytokinesis	1	1	NA
GO.0005865..striated.muscle.thin.filament	1	1	NA
GO.0045121..membrane.raft	0.268031	1	F54E2.1
GO.0030033..microvillus.assembly	1	1	NA
GO.0035148..tube.formation	1	1	NA
GO.0097516..microvillar.actin.bundle	1	1	NA
GO.1990357..terminal.web	1	1	NA
GO.0004016..adenylate.cyclase.activity	1	1	NA
GO.0006171..cAMP.biosynthetic.process	1	1	NA
GO.0006935..chemotaxis	1	1	NA
GO.0007188..adenylate.cyclase.modulating.G.protein.coupled.receptor.signaling.pathway	1	1	NA
GO.0007189..adenylate.cyclase.activating.G.protein.coupled.receptor.signaling.pathway	1	1	NA
GO.0007193..adenylate.cyclase.inhibiting.G.protein.coupled.receptor.signaling.pathway	1	1	NA
GO.0007614..short.term.memory	1	1	NA
GO.0008219..cell.death	1	1	NA
GO.0009190..cyclic.nucleotide.biosynthetic.process	1	1	NA
GO.0016849..phosphorus.oxygen.lyase.activity	1	1	NA
GO.0019933..cAMP.mediated.signaling	1	1	NA
GO.0030431..sleep	1	1	NA
GO.0035556..intracellular.signal.transduction	0.15937	1	W02B8.2, rskn-2
GO.0040013..negative.regulation.of.locomotion	1	1	NA
GO.0040017..positive.regulation.of.locomotion	0.192657	1	dyb-1
GO.0072375..medium.term.memory	1	1	NA
GO.0004383..guanylate.cyclase.activity	1	1	NA
GO.0006182..cGMP.biosynthetic.process	1	1	NA
GO.0007165..signal.transduction	0.818857	1	srgp-1
GO.0008294..calcium..and.calmodulin.responsive.adenylate.cyclase.activity	1	1	NA
GO.0090038..negative.regulation.of.protein.kinase.C.signaling	1	1	NA
GO.2000114..regulation.of.establishment.of.cell.polarity	1	1	NA
GO.0007186..G.protein.coupled.receptor.signaling.pathway	1	1	NA
GO.1900195..positive.regulation.of.oocyte.maturation	1	1	NA
GO.0003779..actin.binding	1	1	NA
GO.0007613..memory	1	1	NA
GO.0007616..long.term.memory	1	1	NA
GO.0014069..postsynaptic.density	1	1	NA
GO.0051015..actin.filament.binding	1	1	NA
GO.0051016..barbed.end.actin.filament.capping	1	1	NA
GO.0097120..receptor.localization.to.synapse	1	1	NA
GO.2000249..regulation.of.actin.cytoskeleton.reorganization	1	1	NA
GO.0004222..metalloendopeptidase.activity	1	1	NA
GO.0007229..integrin.mediated.signaling.pathway	1	1	NA
GO.0008233..peptidase.activity	0.679304	1	rom-4
GO.0022401..negative.adaptation.of.signaling.pathway	1	1	NA
GO.0046959..habituation	1	1	NA
GO.0004000..adenosine.deaminase.activity	1	1	NA
GO.0005634..nucleus	0.00926502	1	saeg-1, bra-1, nhr-48, nhr-66, pqn-85, mdt-26, pcaf-1, lin-59, bet-1, xnp-1, pqn-21, wdr-23, hsr-9, cel-1, rfp-1, zfp-1
GO.0006382..adenosine.to.inosine.editing	1	1	NA
GO.0006396..RNA.processing	1	1	NA
GO.0022626..cytosolic.ribosome	1	1	NA
GO.0048477..oogenesis	0.306546	1	folt-1, emb-8
GO.0006397..mRNA.processing	0.344535	1	cel-1
GO.0003824..catalytic.activity	0.0552224	1	acs-17, ldh-1, acs-13, cel-1, aldo-1
GO.0005777..peroxisome	1	1	NA
GO.0006629..lipid.metabolic.process	0.656723	1	acl-1
GO.0008609..alkylglycerone.phosphate.synthase.activity	1	1	NA
GO.0008610..lipid.biosynthetic.process	0.0300782	1	emb-8
GO.0008611..ether.lipid.biosynthetic.process	1	1	NA
GO.0016491..oxidoreductase.activity	0.46066	1	dhs-17, ldh-1, emb-8
GO.0016614..oxidoreductase.activity..acting.on.CH.OH.group.of.donors	1	1	NA
GO.0050660..flavin.adenine.dinucleotide.binding	1	1	NA
GO.0055114..oxidation.reduction.process	0.591499	1	dhs-17, ldh-1, emb-8
GO.0071949..FAD.binding	1	1	NA
GO.0008270..zinc.ion.binding	0.0275107	1	nhr-48, nhr-66, dyb-1, lin-59, C36B1.9, lin-41, rfp-1, zfp-1
GO.0008361..regulation.of.cell.size	1	1	NA
GO.0010171..body.morphogenesis	0.0501	1	C02B10.5, gex-3, pqn-85, mdt-26, lin-41, cel-1, W04A4.5
GO.0030199..collagen.fibril.organization	1	1	NA
GO.0043652..engulfment.of.apoptotic.cell	0.0927769	1	jph-1, sax-2
GO.0004871..signal.transducer.activity	1	1	NA
GO.0014057..positive.regulation.of.acetylcholine.secretion..neurotransmission	1	1	NA
GO.0016079..synaptic.vesicle.exocytosis	1	1	NA
GO.0030163..protein.catabolic.process	1	1	NA
GO.0030421..defecation	0.240618	1	folt-1
GO.0035418..protein.localization.to.synapse	1	1	NA
GO.0060179..male.mating.behavior	1	1	NA
GO.0004930..G.protein.coupled.receptor.activity	1	1	NA
GO.0007218..neuropeptide.signaling.pathway	1	1	NA
GO.0008188..neuropeptide.receptor.activity	1	1	NA
GO.2000294..positive.regulation.of.defecation	1	1	NA
GO.0005085..guanyl.nucleotide.exchange.factor.activity	0.14694	1	F46H5.4
GO.0007618..mating	1	1	NA
GO.0017112..Rab.guanyl.nucleotide.exchange.factor.activity	1	1	NA
GO.0043547..positive.regulation.of.GTPase.activity	0.00257568	1	F46H5.4, rbg-1, srgp-1, efa-6
GO.0004252..serine.type.endopeptidase.activity	0.152144	1	rom-4
GO.0003924..GTPase.activity	1	1	NA
GO.0005525..GTP.binding	0.656723	1	cel-1
GO.0006886..intracellular.protein.transport	1	1	NA
GO.0006913..nucleocytoplasmic.transport	1	1	NA
GO.0007264..small.GTPase.mediated.signal.transduction	0.379768	1	F46H5.4
GO.0008021..synaptic.vesicle	0.120446	1	wdr-23
GO.0015031..protein.transport	0.679304	1	sec-3
GO.0030141..secretory.granule	1	1	NA
GO.0032402..melanosome.transport	1	1	NA
GO.0042470..melanosome	1	1	NA
GO.0045921..positive.regulation.of.exocytosis	1	1	NA
GO.0090522..vesicle.tethering.involved.in.exocytosis	1	1	NA
GO.1903364..positive.regulation.of.cellular.protein.catabolic.process	1	1	NA
GO.1990504..dense.core.granule.exocytosis	0.0300782	1	ric-7
GO.0002250..adaptive.immune.response	1	1	NA
GO.0006954..inflammatory.response	1	1	NA
GO.0006979..response.to.oxidative.stress	1	1	NA
GO.0007568..aging	1	1	NA
GO.0007611..learning.or.memory	1	1	NA
GO.0014065..phosphatidylinositol.3.kinase.signaling	1	1	NA
GO.0016303..1.phosphatidylinositol.3.kinase.activity	1	1	NA
GO.0016773..phosphotransferase.activity..alcohol.group.as.acceptor	1	1	NA
GO.0030168..platelet.activation	1	1	NA
GO.0031513..nonmotile.primary.cilium	1	1	NA
GO.0035005..1.phosphatidylinositol.4.phosphate.3.kinase.activity	1	1	NA
GO.0036092..phosphatidylinositol.3.phosphate.biosynthetic.process	1	1	NA
GO.0043053..dauer.entry	1	1	NA
GO.0046686..response.to.cadmium.ion	1	1	NA
GO.0048015..phosphatidylinositol.mediated.signaling	1	1	NA
GO.0050919..negative.chemotaxis	1	1	NA
GO.0050920..regulation.of.chemotaxis	1	1	NA
GO.0060326..cell.chemotaxis	1	1	NA
GO.1901047..insulin.receptor.signaling.pathway.involved.in.determination.of.adult.lifespan	1	1	NA
GO.0001965..G.protein.alpha.subunit.binding	1	1	NA
GO.0005096..GTPase.activator.activity	0.0318955	1	rbg-1, srgp-1
GO.0030695..GTPase.regulator.activity	1	1	NA
GO.0050790..regulation.of.catalytic.activity	1	1	NA
GO.0060259..regulation.of.feeding.behavior	1	1	NA
GO.0003684..damaged.DNA.binding	1	1	NA
GO.0003908..methylated.DNA..protein..cysteine.S.methyltransferase.activity	1	1	NA
GO.0006281..DNA.repair	0.39482	1	xnp-1
GO.0006307..DNA.dealkylation.involved.in.DNA.repair	1	1	NA
GO.0016765..transferase.activity..transferring.alkyl.or.aryl..other.than.methyl..groups	1	1	NA
GO.0032259..methylation	0.405871	1	lin-59
GO.0001085..RNA.polymerase.II.transcription.factor.binding	1	1	NA
GO.0001708..cell.fate.specification	0.0358201	1	bet-1, sin-3
GO.0003677..DNA.binding	0.0712578	1	saeg-1, F28H6.4, nhr-48, nhr-66, mdt-26, xnp-1, zfp-1
GO.0003700..transcription.factor.activity..sequence.specific.DNA.binding	0.626457	1	nhr-48, nhr-66
GO.0005667..transcription.factor.complex	1	1	NA
GO.0006351..transcription..DNA.templated	0.138427	1	nhr-48, nhr-66, mdt-26, lin-59, bet-1
GO.0006355..regulation.of.transcription..DNA.templated	0.0509064	1	F46H5.4, nhr-48, nhr-66, pcaf-1, lin-59, bet-1, sin-3
GO.0006366..transcription.from.RNA.polymerase.II.promoter	1	1	NA
GO.0007275..multicellular.organism.development	0.372571	1	hst-2, gex-3, lin-41
GO.0009410..response.to.xenobiotic.stimulus	1	1	NA
GO.0022008..neurogenesis	1	1	NA
GO.0030522..intracellular.receptor.signaling.pathway	1	1	NA
GO.0035176..social.behavior	1	1	NA
GO.0043565..sequence.specific.DNA.binding	0.522468	1	nhr-48, nhr-66
GO.0045944..positive.regulation.of.transcription.from.RNA.polymerase.II.promoter	0.046612	1	lin-59, rskn-2, hsr-9
GO.0090575..RNA.polymerase.II.transcription.factor.complex	1	1	NA
GO.0004874..aryl.hydrocarbon.receptor.activity	1	1	NA
GO.0007399..nervous.system.development	0.348546	1	cdk-5
GO.0007416..synapse.assembly	1	1	NA
GO.0007610..behavior	1	1	NA
GO.0034753..nuclear.aryl.hydrocarbon.receptor.complex	1	1	NA
GO.0046685..response.to.arsenic.containing.substance	1	1	NA
GO.0071218..cellular.response.to.misfolded.protein	1	1	NA
GO.0000235..astral.microtubule	1	1	NA
GO.0000780..condensed.nuclear.chromosome..centromeric.region	1	1	NA
GO.0000794..condensed.nuclear.chromosome	1	1	NA
GO.0005813..centrosome	1	1	NA
GO.0005828..kinetochore.microtubule	1	1	NA
GO.0007020..microtubule.nucleation	1	1	NA
GO.0007049..cell.cycle	0.172287	1	pqn-85, cdk-5
GO.0031616..spindle.pole.centrosome	1	1	NA
GO.0032133..chromosome.passenger.complex	1	1	NA
GO.0032465..regulation.of.cytokinesis	1	1	NA
GO.0035174..histone.serine.kinase.activity	1	1	NA
GO.0035404..histone.serine.phosphorylation	1	1	NA
GO.0040002..collagen.and.cuticulin.based.cuticle.development	1	1	NA
GO.0051233..spindle.midzone	1	1	NA
GO.0090307..mitotic.spindle.assembly	1	1	NA
GO.1904781..positive.regulation.of.protein.localization.to.centrosome	1	1	NA
GO.0000793..condensed.chromosome	0.162457	1	ify-1
GO.0004674..protein.serine.threonine.kinase.activity	0.132089	1	rskn-2, prk-1, cdk-5
GO.0005694..chromosome	0.379768	1	bet-1
GO.0005819..spindle	1	1	NA
GO.0005876..spindle.microtubule	0.059262	1	ify-1
GO.0007059..chromosome.segregation	1	1	NA
GO.0007067..mitotic.nuclear.division	1	1	NA
GO.0007126..meiotic.nuclear.division	0.028822	1	sec-3, srgp-1, ify-1
GO.0007281..germ.cell.development	1	1	NA
GO.0016568..chromatin.modification	0.0385348	1	lin-59, rfp-1
GO.0018105..peptidyl.serine.phosphorylation	1	1	NA
GO.0018107..peptidyl.threonine.phosphorylation	1	1	NA
GO.0019894..kinesin.binding	1	1	NA
GO.0030261..chromosome.condensation	1	1	NA
GO.0030496..midbody	1	1	NA
GO.0031991..regulation.of.actomyosin.contractile.ring.contraction	1	1	NA
GO.0045184..establishment.of.protein.localization	1	1	NA
GO.0046777..protein.autophosphorylation	0.0986664	1	prk-1
GO.0051117..ATPase.binding	1	1	NA
GO.0051256..mitotic.spindle.midzone.assembly	1	1	NA
GO.0051301..cell.division	0.502927	1	cdk-5
GO.0051321..meiotic.cell.cycle	1	1	NA
GO.0005913..cell.cell.adherens.junction	1	1	NA
GO.0008092..cytoskeletal.protein.binding	0.0763538	1	dyb-1
GO.0016327..apicolateral.plasma.membrane	1	1	NA
GO.0040027..negative.regulation.of.vulval.development	0.127993	1	sin-3, lin-41, zfp-1
GO.0043296..apical.junction.complex	1	1	NA
GO.0044292..dendrite.terminus	1	1	NA
GO.0045216..cell.cell.junction.organization	1	1	NA
GO.0032266..phosphatidylinositol.3.phosphate.binding	0.00273608	1	ppk-3, aka-1
GO.0002376..immune.system.process	1	1	NA
GO.0005516..calmodulin.binding	1	1	NA
GO.0042771..intrinsic.apoptotic.signaling.pathway.in.response.to.DNA.damage.by.p53.class.mediator	1	1	NA
GO.0043025..neuronal.cell.body	0.157236	1	ppk-3, wdr-23
GO.0000932..cytoplasmic.mRNA.processing.body	1	1	NA
GO.0003676..nucleic.acid.binding	0.217543	1	lsy-2, ztf-17, ztf-27, pqn-21
GO.0003725..double.stranded.RNA.binding	1	1	NA
GO.0003727..single.stranded.RNA.binding	1	1	NA
GO.0016892..endoribonuclease.activity..producing.3.phosphomonoesters	1	1	NA
GO.0035068..micro.ribonucleoprotein.complex	1	1	NA
GO.0035196..production.of.miRNAs.involved.in.gene.silencing.by.miRNA	1	1	NA
GO.0035198..miRNA.binding	1	1	NA
GO.0035279..mRNA.cleavage.involved.in.gene.silencing.by.miRNA	1	1	NA
GO.0070551..endoribonuclease.activity..cleaving.siRNA.paired.mRNA	1	1	NA
GO.0070922..small.RNA.loading.onto.RISC	1	1	NA
GO.0090502..RNA.phosphodiester.bond.hydrolysis..endonucleolytic	1	1	NA
GO.0004029..aldehyde.dehydrogenase..NAD..activity	1	1	NA
GO.0016620..oxidoreductase.activity..acting.on.the.aldehyde.or.oxo.group.of.donors..NAD.or.NADP.as.acceptor	1	1	NA
GO.0048871..multicellular.organismal.homeostasis	1	1	NA
GO.0006730..one.carbon.metabolic.process	1	1	NA
GO.0009058..biosynthetic.process	1	1	NA
GO.0009258..10.formyltetrahydrofolate.catabolic.process	1	1	NA
GO.0016155..formyltetrahydrofolate.dehydrogenase.activity	1	1	NA
GO.0016742..hydroxymethyl...formyl..and.related.transferase.activity	1	1	NA
GO.0019145..aminobutyraldehyde.dehydrogenase.activity	1	1	NA
GO.0047105..4.trimethylammoniobutyraldehyde.dehydrogenase.activity	1	1	NA
GO.0004028..3.chloroallyl.aldehyde.dehydrogenase.activity	1	1	NA
GO.0004030..aldehyde.dehydrogenase..NAD.P....activity	1	1	NA
GO.0006081..cellular.aldehyde.metabolic.process	1	1	NA
GO.0003842..1.pyrroline.5.carboxylate.dehydrogenase.activity	1	1	NA
GO.0006537..glutamate.biosynthetic.process	1	1	NA
GO.0006561..proline.biosynthetic.process	1	1	NA
GO.0032502..developmental.process	1	1	NA
GO.0004777..succinate.semialdehyde.dehydrogenase..NAD...activity	1	1	NA
GO.0009013..succinate.semialdehyde.dehydrogenase..NAD.P....activity	1	1	NA
GO.0000062..fatty.acyl.CoA.binding	1	1	NA
GO.0004491..methylmalonate.semialdehyde.dehydrogenase..acylating..activity	1	1	NA
GO.0006573..valine.metabolic.process	1	1	NA
GO.0018478..malonate.semialdehyde.dehydrogenase..acetylating..activity	1	1	NA
GO.0019859..thymine.metabolic.process	1	1	NA
GO.0005575..cellular_component	1	1	NA
GO.0001055..RNA.polymerase.II.activity	1	1	NA
GO.0003899..DNA.directed.RNA.polymerase.activity	1	1	NA
GO.0005665..DNA.directed.RNA.polymerase.II..core.complex	1	1	NA
GO.0006479..protein.methylation	1	1	NA
GO.0007052..mitotic.spindle.organization	0.315771	1	ify-1
GO.0007369..gastrulation	1	1	NA
GO.0008356..asymmetric.cell.division	1	1	NA
GO.0010458..exit.from.mitosis	1	1	NA
GO.0016779..nucleotidyltransferase.activity	0.226533	1	cel-1
GO.0042789..mRNA.transcription.from.RNA.polymerase.II.promoter	1	1	NA
GO.0005887..integral.component.of.plasma.membrane	0.477885	1	folt-1, twk-24
GO.0006995..cellular.response.to.nitrogen.starvation	1	1	NA
GO.0008519..ammonium.transmembrane.transporter.activity	1	1	NA
GO.0015695..organic.cation.transport	1	1	NA
GO.0015696..ammonium.transport	1	1	NA
GO.0019740..nitrogen.utilization	1	1	NA
GO.0072488..ammonium.transmembrane.transport	0.0649937	1	dyb-1
GO.0034648..histone.demethylase.activity..H3.dimethyl.K4.specific.	1	1	NA
GO.0034720..histone.H3.K4.demethylation	1	1	NA
GO.0005635..nuclear.envelope	1	1	NA
GO.0005640..nuclear.outer.membrane	1	1	NA
GO.0007010..cytoskeleton.organization	1	1	NA
GO.0035046..pronuclear.migration	0.281368	1	gex-3
GO.0051087..chaperone.binding	1	1	NA
GO.0051179..localization	1	1	NA
GO.0002143..tRNA.wobble.position.uridine.thiolation	1	1	NA
GO.0004792..thiosulfate.sulfurtransferase.activity	1	1	NA
GO.0008641..small.protein.activating.enzyme.activity	1	1	NA
GO.0016874..ligase.activity	0.512025	1	rfp-1
GO.0016925..protein.sumoylation	1	1	NA
GO.0018117..protein.adenylylation	1	1	NA
GO.0019948..SUMO.activating.enzyme.activity	1	1	NA
GO.0031510..SUMO.activating.enzyme.complex	1	1	NA
GO.0032447..protein.urmylation	1	1	NA
GO.0042292..URM1.activating.enzyme.activity	1	1	NA
GO.0070733..protein.adenylyltransferase.activity	1	1	NA
GO.0005680..anaphase.promoting.complex	1	1	NA
GO.0006511..ubiquitin.dependent.protein.catabolic.process	1	1	NA
GO.0031625..ubiquitin.protein.ligase.binding	1	1	NA
GO.0042787..protein.ubiquitination.involved.in.ubiquitin.dependent.protein.catabolic.process	0.249866	1	lin-41
GO.0061630..ubiquitin.protein.ligase.activity	1	1	NA
GO.0004842..ubiquitin.protein.transferase.activity	0.311562	1	lin-41
GO.0008054..negative.regulation.of.cyclin.dependent.protein.serine.threonine.kinase.by.cyclin.degradation	1	1	NA
GO.0045132..meiotic.chromosome.segregation	0.529729	1	srgp-1
GO.0045842..positive.regulation.of.mitotic.metaphase.anaphase.transition	1	1	NA
GO.0097602..cullin.family.protein.binding	1	1	NA
GO.0002039..p53.binding	1	1	NA
GO.0007219..Notch.signaling.pathway	1	1	NA
GO.0016485..protein.processing	0.120446	1	rom-4
GO.0034394..protein.localization.to.cell.surface	1	1	NA
GO.0043085..positive.regulation.of.catalytic.activity	1	1	NA
GO.0045165..cell.fate.commitment	1	1	NA
GO.0048598..embryonic.morphogenesis	1	1	NA
GO.0048599..oocyte.development	1	1	NA
GO.0060581..cell.fate.commitment.involved.in.pattern.specification	1	1	NA
GO.0070765..gamma.secretase.complex	1	1	NA
GO.0005768..endosome	1	1	NA
GO.0005769..early.endosome	1	1	NA
GO.0008201..heparin.binding	1	1	NA
GO.0031410..cytoplasmic.vesicle	1	1	NA
GO.0042395..ecdysis..collagen.and.cuticulin.based.cuticle	1	1	NA
GO.0046914..transition.metal.ion.binding	1	1	NA
GO.0009306..protein.secretion	1	1	NA
GO.0016192..vesicle.mediated.transport	0.348546	1	efa-6
GO.0030131..clathrin.adaptor.complex	1	1	NA
GO.0045176..apical.protein.localization	0.059262	1	soap-1
GO.0003906..DNA..apurinic.or.apyrimidinic.site..lyase.activity	1	1	NA
GO.0006284..base.excision.repair	1	1	NA
GO.0006974..cellular.response.to.DNA.damage.stimulus	0.152984	1	xnp-1, sin-3
GO.0008081..phosphoric.diester.hydrolase.activity	1	1	NA
GO.0008311..double.stranded.DNA.3.5.exodeoxyribonuclease.activity	1	1	NA
GO.0017005..3.tyrosyl.DNA.phosphodiesterase.activity	1	1	NA
GO.0090305..nucleic.acid.phosphodiester.bond.hydrolysis	1	1	NA
GO.0004177..aminopeptidase.activity	1	1	NA
GO.0001714..endodermal.cell.fate.specification	1	1	NA
GO.0005881..cytoplasmic.microtubule	1	1	NA
GO.0005912..adherens.junction	0.104161	1	srgp-1
GO.0007026..negative.regulation.of.microtubule.depolymerization	1	1	NA
GO.0007389..pattern.specification.process	1	1	NA
GO.0007492..endoderm.development	1	1	NA
GO.0008013..beta.catenin.binding	1	1	NA
GO.0008283..cell.proliferation	1	1	NA
GO.0016055..Wnt.signaling.pathway	1	1	NA
GO.0016476..regulation.of.embryonic.cell.shape	1	1	NA
GO.0016477..cell.migration	0.535489	1	gex-3
GO.0030177..positive.regulation.of.Wnt.signaling.pathway	1	1	NA
GO.0030178..negative.regulation.of.Wnt.signaling.pathway	1	1	NA
GO.0030334..regulation.of.cell.migration	0.294465	1	hst-2
GO.0030877..beta.catenin.destruction.complex	1	1	NA
GO.0035414..negative.regulation.of.catenin.import.into.nucleus	1	1	NA
GO.0045295..gamma.catenin.binding	1	1	NA
GO.0045595..regulation.of.cell.differentiation	1	1	NA
GO.0045732..positive.regulation.of.protein.catabolic.process	1	1	NA
GO.0047485..protein.N.terminus.binding	1	1	NA
GO.0048666..neuron.development	1	1	NA
GO.0051782..negative.regulation.of.cell.division	1	1	NA
GO.0090090..negative.regulation.of.canonical.Wnt.signaling.pathway	1	1	NA
GO.0008565..protein.transporter.activity	1	1	NA
GO.0030276..clathrin.binding	1	1	NA
GO.0005794..Golgi.apparatus	0.526823	1	hst-2
GO.0030117..membrane.coat	1	1	NA
GO.0030121..AP.1.adaptor.complex	0.0300782	1	soap-1
GO.0030119..AP.type.membrane.coat.adaptor.complex	1	1	NA
GO.0008022..protein.C.terminus.binding	1	1	NA
GO.0008104..protein.localization	1	1	NA
GO.0030139..endocytic.vesicle	1	1	NA
GO.0032794..GTPase.activating.protein.binding	1	1	NA
GO.0036062..presynaptic.periactive.zone	1	1	NA
GO.0045334..clathrin.coated.endocytic.vesicle	1	1	NA
GO.0007040..lysosome.organization	1	1	NA
GO.0030123..AP.3.adaptor.complex	1	1	NA
GO.0007154..cell.communication	1	1	NA
GO.0008595..anterior.posterior.axis.specification..embryo	1	1	NA
GO.0009880..embryonic.pattern.specification	1	1	NA
GO.0016331..morphogenesis.of.embryonic.epithelium	1	1	NA
GO.0040028..regulation.of.vulval.development	0.11505	1	bet-1
GO.0046331..lateral.inhibition	1	1	NA
GO.0006833..water.transport	1	1	NA
GO.0015204..urea.transmembrane.transporter.activity	1	1	NA
GO.0015250..water.channel.activity	1	1	NA
GO.0015254..glycerol.channel.activity	1	1	NA
GO.0015793..glycerol.transport	1	1	NA
GO.0016323..basolateral.plasma.membrane	1	1	NA
GO.0022838..substrate.specific.channel.activity	1	1	NA
GO.0071918..urea.transmembrane.transport	1	1	NA
GO.0016324..apical.plasma.membrane	1	1	NA
GO.0008150..biological_process	1	1	NA
GO.0016567..protein.ubiquitination	0.402209	1	rfp-1
GO.0005783..endoplasmic.reticulum	0.322254	1	emb-8, aldo-1
GO.0007005..mitochondrion.organization	1	1	NA
GO.0007276..gamete.generation	0.121938	1	folt-1, lin-41
GO.0048259..regulation.of.receptor.mediated.endocytosis	1	1	NA
GO.1904748..regulation.of.apoptotic.process.involved.in.development	1	1	NA
GO.0032940..secretion.by.cell	1	1	NA
GO.0012505..endomembrane.system	1	1	NA
GO.0042059..negative.regulation.of.epidermal.growth.factor.receptor.signaling.pathway	1	1	NA
GO.0000226..microtubule.cytoskeleton.organization	1	1	NA
GO.0005764..lysosome	1	1	NA
GO.0008088..axo.dendritic.transport	1	1	NA
GO.0008333..endosome.to.lysosome.transport	1	1	NA
GO.0048786..presynaptic.active.zone	1	1	NA
GO.0005930..axoneme	1	1	NA
GO.0030425..dendrite	0.0331837	1	bra-1, cdk-5
GO.0046907..intracellular.transport	1	1	NA
GO.0032501..multicellular.organismal.process	1	1	NA
GO.0040010..positive.regulation.of.growth.rate	1	1	NA
GO.0050896..response.to.stimulus	1	1	NA
GO.0000049..tRNA.binding	1	1	NA
GO.0004812..aminoacyl.tRNA.ligase.activity	1	1	NA
GO.0004813..alanine.tRNA.ligase.activity	1	1	NA
GO.0006400..tRNA.modification	1	1	NA
GO.0006412..translation	0.776183	1	R07E3.4
GO.0006419..alanyl.tRNA.aminoacylation	1	1	NA
GO.0016597..amino.acid.binding	1	1	NA
GO.0016876..ligase.activity..forming.aminoacyl.tRNA.and.related.compounds	1	1	NA
GO.0043039..tRNA.aminoacylation	1	1	NA
GO.0005789..endoplasmic.reticulum.membrane	0.140376	1	rom-4, emb-8
GO.0006631..fatty.acid.metabolic.process	1	1	NA
GO.0006633..fatty.acid.biosynthetic.process	1	1	NA
GO.0016627..oxidoreductase.activity..acting.on.the.CH.CH.group.of.donors	1	1	NA
GO.0005885..Arp2.3.protein.complex	1	1	NA
GO.0007015..actin.filament.organization	0.109622	1	gex-3
GO.0010631..epithelial.cell.migration	1	1	NA
GO.0031252..cell.leading.edge	1	1	NA
GO.0034314..Arp2.3.complex.mediated.actin.nucleation	1	1	NA
GO.0009790..embryo.development	1	1	NA
GO.0015629..actin.cytoskeleton	1	1	NA
GO.0030833..regulation.of.actin.filament.polymerization	1	1	NA
GO.0000176..nuclear.exosome..RNase.complex.	1	1	NA
GO.0000177..cytoplasmic.exosome..RNase.complex.	1	1	NA
GO.0004527..exonuclease.activity	1	1	NA
GO.0005730..nucleolus	1	1	NA
GO.0016075..rRNA.catabolic.process	1	1	NA
GO.0031125..rRNA.3.end.processing	1	1	NA
GO.0034427..nuclear.transcribed.mRNA.catabolic.process..exonucleolytic..3.5	1	1	NA
GO.0034475..U4.snRNA.3.end.processing	1	1	NA
GO.0071028..nuclear.mRNA.surveillance	1	1	NA
GO.0071051..polyadenylation.dependent.snoRNA.3.end.processing	1	1	NA
GO.0055120..striated.muscle.dense.body	0.104177	1	wdr-23, aldo-1
GO.0030041..actin.filament.polymerization	1	1	NA
GO.0000276..mitochondrial.proton.transporting.ATP.synthase.complex..coupling.factor.F.o.	1	1	NA
GO.0015078..hydrogen.ion.transmembrane.transporter.activity	1	1	NA
GO.0015986..ATP.synthesis.coupled.proton.transport	1	1	NA
GO.0034606..response.to.hermaphrodite.contact	1	1	NA
GO.0046933..proton.transporting.ATP.synthase.activity..rotational.mechanism	1	1	NA
GO.0003713..transcription.coactivator.activity	1	1	NA
GO.0045893..positive.regulation.of.transcription..DNA.templated	1	1	NA
GO.0006754..ATP.biosynthetic.process	1	1	NA
GO.0015992..proton.transport	1	1	NA
GO.0031966..mitochondrial.membrane	1	1	NA
GO.0045263..proton.transporting.ATP.synthase.complex..coupling.factor.F.o.	1	1	NA
GO.0004767..sphingomyelin.phosphodiesterase.activity	1	1	NA
GO.0006665..sphingolipid.metabolic.process	1	1	NA
GO.0006685..sphingomyelin.catabolic.process	1	1	NA
GO.0016798..hydrolase.activity..acting.on.glycosyl.bonds	1	1	NA
GO.0046513..ceramide.biosynthetic.process	1	1	NA
GO.0004190..aspartic.type.endopeptidase.activity	1	1	NA
GO.0098591..external.side.of.apical.plasma.membrane	1	1	NA
GO.0070265..necrotic.cell.death	1	1	NA
GO.0000122..negative.regulation.of.transcription.from.RNA.polymerase.II.promoter	0.00694887	1	bra-1, wdr-23, sin-3
GO.0001012..RNA.polymerase.II.regulatory.region.DNA.binding	1	1	NA
GO.0001078..transcriptional.repressor.activity..RNA.polymerase.II.core.promoter.proximal.region.sequence.specific.binding	1	1	NA
GO.0007623..circadian.rhythm	1	1	NA
GO.0000977..RNA.polymerase.II.regulatory.region.sequence.specific.DNA.binding	0.0611723	1	bra-1, ztf-17
GO.0000981..RNA.polymerase.II.transcription.factor.activity..sequence.specific.DNA.binding	1	1	NA
GO.0006357..regulation.of.transcription.from.RNA.polymerase.II.promoter	0.471374	1	bet-1
GO.0031929..TOR.signaling	1	1	NA
GO.0006990..positive.regulation.of.transcription.from.RNA.polymerase.II.promoter.involved.in.unfolded.protein.response	1	1	NA
GO.0035966..response.to.topologically.incorrect.protein	1	1	NA
GO.1904576..response.to.tunicamycin	1	1	NA
GO.0045089..positive.regulation.of.innate.immune.response	1	1	NA
GO.0045824..negative.regulation.of.innate.immune.response	1	1	NA
GO.0051019..mitogen.activated.protein.kinase.binding	1	1	NA
GO.0005975..carbohydrate.metabolic.process	0.490536	1	ldh-1
GO.0043169..cation.binding	1	1	NA
GO.0000785..chromatin	0.0931387	1	zfp-1
GO.0005743..mitochondrial.inner.membrane	0.430887	1	R07E3.4
GO.0005929..cilium	1	1	NA
GO.0007617..mating.behavior	1	1	NA
GO.0015991..ATP.hydrolysis.coupled.proton.transport	1	1	NA
GO.0016820..hydrolase.activity..acting.on.acid.anhydrides..catalyzing.transmembrane.movement.of.substances	1	1	NA
GO.0019904..protein.domain.specific.binding	1	1	NA
GO.0033178..proton.transporting.two.sector.ATPase.complex..catalytic.domain	1	1	NA
GO.0043050..pharyngeal.pumping	1	1	NA
GO.0045261..proton.transporting.ATP.synthase.complex..catalytic.core.F.1.	1	1	NA
GO.0046034..ATP.metabolic.process	1	1	NA
GO.0042776..mitochondrial.ATP.synthesis.coupled.proton.transport	1	1	NA
GO.0010494..cytoplasmic.stress.granule	1	1	NA
GO.0010603..regulation.of.cytoplasmic.mRNA.processing.body.assembly	1	1	NA
GO.0034063..stress.granule.assembly	1	1	NA
GO.0040022..feminization.of.hermaphroditic.germ.line	1	1	NA
GO.0044822..poly.A..RNA.binding	1	1	NA
GO.0051729..germline.cell.cycle.switching..mitotic.to.meiotic.cell.cycle	0.221781	1	folt-1
GO.0006821..chloride.transport	1	1	NA
GO.0008068..extracellular.glutamate.gated.chloride.channel.activity	1	1	NA
GO.0008144..drug.binding	1	1	NA
GO.0031987..locomotion.involved.in.locomotory.behavior	1	1	NA
GO.0042493..response.to.drug	1	1	NA
GO.0043051..regulation.of.pharyngeal.pumping	1	1	NA
GO.1902476..chloride.transmembrane.transport	1	1	NA
GO.0001508..action.potential	1	1	NA
GO.0000779..condensed.chromosome..centromeric.region	1	1	NA
GO.0003690..double.stranded.DNA.binding	1	1	NA
GO.0005654..nucleoplasm	1	1	NA
GO.0006997..nucleus.organization	1	1	NA
GO.0010165..response.to.X.ray	1	1	NA
GO.0051276..chromosome.organization	1	1	NA
GO.0006457..protein.folding	1	1	NA
GO.0016049..cell.growth	1	1	NA
GO.0002009..morphogenesis.of.an.epithelium	0.104161	1	xnp-1
GO.0007155..cell.adhesion	1	1	NA
GO.0007265..Ras.protein.signal.transduction	1	1	NA
GO.0008134..transcription.factor.binding	0.192657	1	wdr-23
GO.0016342..catenin.complex	1	1	NA
GO.0019903..protein.phosphatase.binding	1	1	NA
GO.0034333..adherens.junction.assembly	1	1	NA
GO.0034599..cellular.response.to.oxidative.stress	1	1	NA
GO.0042659..regulation.of.cell.fate.specification	1	1	NA
GO.0045294..alpha.catenin.binding	1	1	NA
GO.0045296..cadherin.binding	1	1	NA
GO.0048513..animal.organ.development	1	1	NA
GO.0006520..cellular.amino.acid.metabolic.process	1	1	NA
GO.0007606..sensory.perception.of.chemical.stimulus	1	1	NA
GO.0016831..carboxy.lyase.activity	1	1	NA
GO.0019752..carboxylic.acid.metabolic.process	0.0706909	1	ldh-1
GO.0030170..pyridoxal.phosphate.binding	1	1	NA
GO.0034607..turning.behavior.involved.in.mating	0.0476941	1	sax-2
GO.0036468..L.dopa.decarboxylase.activity	1	1	NA
GO.0042416..dopamine.biosynthetic.process	1	1	NA
GO.0042427..serotonin.biosynthetic.process	1	1	NA
GO.0004497..monooxygenase.activity	1	1	NA
GO.0004505..phenylalanine.4.monooxygenase.activity	1	1	NA
GO.0004510..tryptophan.5.monooxygenase.activity	1	1	NA
GO.0005506..iron.ion.binding	0.4515	1	emb-8
GO.0006559..L.phenylalanine.catabolic.process	1	1	NA
GO.0006569..tryptophan.catabolic.process	1	1	NA
GO.0006571..tyrosine.biosynthetic.process	1	1	NA
GO.0009072..aromatic.amino.acid.family.metabolic.process	1	1	NA
GO.0016714..oxidoreductase.activity..acting.on.paired.donors..with.incorporation.or.reduction.of.molecular.oxygen..reduced.pteridine.as.one.donor..and.incorporation.of.one.atom.of.oxygen	1	1	NA
GO.0042438..melanin.biosynthetic.process	1	1	NA
GO.0005113..patched.binding	1	1	NA
GO.0005119..smoothened.binding	1	1	NA
GO.0030030..cell.projection.organization	1	1	NA
GO.0034464..BBSome	1	1	NA
GO.0035058..nonmotile.primary.cilium.assembly	1	1	NA
GO.0035721..intraciliary.retrograde.transport	1	1	NA
GO.0036064..ciliary.basal.body	1	1	NA
GO.0061512..protein.localization.to.cilium	1	1	NA
GO.0031514..motile.cilium	1	1	NA
GO.1903441..protein.localization.to.ciliary.membrane	1	1	NA
GO.0005198..structural.molecule.activity	0.221781	1	jph-1
GO.0006890..retrograde.vesicle.mediated.transport..Golgi.to.ER	1	1	NA
GO.0008355..olfactory.learning	1	1	NA
GO.0042073..intraciliary.transport	1	1	NA
GO.0042384..cilium.assembly	1	1	NA
GO.0097546..ciliary.base	1	1	NA
GO.1904107..protein.localization.to.microvillus.membrane	1	1	NA
GO.0004089..carbonate.dehydratase.activity	1	1	NA
GO.0000045..autophagosome.assembly	1	1	NA
GO.0000407..pre.autophagosomal.structure	1	1	NA
GO.0006914..autophagy	0.197585	1	rbg-1
GO.0009267..cellular.response.to.starvation	1	1	NA
GO.0012501..programmed.cell.death	1	1	NA
GO.0016023..cytoplasmic..membrane.bounded.vesicle	1	1	NA
GO.0032258..CVT.pathway	1	1	NA
GO.0034271..phosphatidylinositol.3.kinase.complex..class.III..type.I	1	1	NA
GO.0034272..phosphatidylinositol.3.kinase.complex..class.III..type.II	1	1	NA
GO.0040014..regulation.of.multicellular.organism.growth	0.136439	1	lin-59
GO.0043277..apoptotic.cell.clearance	1	1	NA
GO.0044804..nucleophagy	1	1	NA
GO.0045138..nematode.male.tail.tip.morphogenesis	0.0099754	1	lin-59, sin-3, lin-41
GO.0045324..late.endosome.to.vacuole.transport	1	1	NA
GO.0005874..microtubule	1	1	NA
GO.0007017..microtubule.based.process	1	1	NA
GO.0007635..chemosensory.behavior	1	1	NA
GO.0004869..cysteine.type.endopeptidase.inhibitor.activity	1	1	NA
GO.0009966..regulation.of.signal.transduction	1	1	NA
GO.0016573..histone.acetylation	0.0931387	1	pcaf-1
[truncated: 4,615 more rows]

## Sheet: N3UvF3U-N3Uup-withMAB5peak
	p.values	FDR.BH	genes
[truncated: 5,318 more rows]

## Sheet: N3UvF3U-F3Uup-withMAB5peak
	p.values	FDR.BH	genes
[truncated: 5,318 more rows]

[truncated: 2 more sheets: N3MvF3M-N3Mup-withMAB5peak, N3MvF3M-F3Mup-withMAB5peak]
