# Supplementary material for: Self-sperm induce resistance to the detrimental effects of sexual encounters with males in hermaphroditic nematodes
Source: eLife. 2019 Jul 8;8:e46418. doi: 10.7554/eLife.46418 (PMC6697445; doi:10.7554/eLife.46418)
Supplement: Source data 1. [file elife-46418-data1.xlsx]

## Sheet: ReadMe
Results from Mating Efficiency Experiments
In the following sheets, are the data that comprise the data is Table S3
The individual mating effiiencies from each plate of 20 hermaphrodites (or germline mutants) and 40 males is shown
The individual biological replicates are also shown
(For Table S3, we combined all data from the individual plates and biological replicates to disply the median and test signifcance)
In the labels for each mating set up, the animals being counted for the mating efficiency are underlined

## Sheet: Data
	Young (day 3) hermaphrodite x young (day 3) him-5 males	Middle-aged (day 7) hermaphrodite x young (day 3) him-5 males	Young (day 3) hermaphrodite x middle-aged (day 7) him-5 males	Middle-aged (day 7) hermaphrodite x middle-aged (day 7) him-5 males		Young (day 3) hermaphrodite x young (day 4) him-5 males	Middle-aged (day 3) hermaphrodite x young (day 4) him-5 males		Young (day 3) hermaphrodite x young (day 4) him-5 males	Young (day 3) feminized (fog-2) x young (day 4) him-5 males		Young (day 3) hermaphrodite x young (day 4) him-5 males	Young (day 3) feminized (fem-1) x young (day 4) him-5 males	Young (day 3) germline-less (glp-1) x young (day 4) him-5 males		Young (day 3) hermaphrodite x young (day 4) him-5 males	Young (day 3) feminized (fem-1) x young (day 4) him-5 males	Middle-aged (day 7) hermaphrodite x young (day 4) him-5 males	Middle-aged (day 7) feminized (fem-1) x young (day 4) him-5 males		Young (day 3) hermaphrodite x young (day 4) him-5 males	Young (day 3) masculinized (fem-3) x young (day 4) him-5 males	Middle-aged (day 6) hermaphrodite x young (day 4) him-5 males	Middle-aged (day 6) masculinized (fem-3) x young (day 4) him-5 males		Young (day 3) spe-44::degron without auxin x young (day 4) him-5 males	Young (day 3) spe-44::degron on 1mM auxin x young (day 4) him-5 males		Young (day 4) C. briggsae hermaphrodite (HK104) x young Cbr-him-5 males	Young (day 4) C. briggsae hermaphrodite (AF16) x young Cbr-him-5 males	Young (day 4) C. briggsae feminized (she-1) x young Cbr-him-5 males		Young (day 4) C. briggsae hermaphrodite (HK104) x young Cbr-him-5 males	Middle-aged (day 8) C. briggsae hermaphrodite (HK104) x young Cbr-him-5 males	Young (day 4) C. briggsae hermaphrodite (AF16) x young Cbr-him-5 males	Middle-aged (day 8) C. briggsae hermaphrodite (AF16) x young Cbr-him-5 males
Biological Replicate 1	50		5.2			31.6	52.3		50	66.67		50	61.9	80		70	60	52.3	35		50	60				30	55		31.6	50	63.2		20	57.1	25	76.2
	40		5			20	73.7		25	55		71.4	55	71.4		19		65	26.3		38.1	52.4				31.6	47.6		27.8	60	76.2		25	61.9	40	66.7
	31.6					17.6	63.2		19	95		55	42.1	66.7		30		52.3	45		31.8	30				35	42.9		20	52.6	75		15.8	60
						33.3	80		45	80		47.6	68.4	61.9				70	28.6		31.6	50				38	60		52.6	45	55
						43.5	66.7		52.38	90.47		52.4	89.5	60							45	65				28.6	57.1		35		85
						26.3	61.5		35	75		40	75	80							50	20				25	40
						50	70.6		60			50	61.9	38							63.2	65				36.4	57.1
Median	40	n/a	5.1	n/a		31.6	66.7		45	77.5		50	61.9	66.7		30	60	58.65	31.8		45	52.4				31.6	55		31.6	51.3	75		20	60	32.5	71.45
Mean	40.5333	n/a	5.1	n/a		31.7375	66.8375		41.4225	77.0914		52.05	64.4625	65.5875		37.25	60	59.65	33.34		44.3375	49.35				32.025	51.8375		33.1	51.78	71.5667		20.2	59.75	32.5	71.45
Biological Replicate 2	27	45	0	0		45	45		28.6	70		75	61.9	100		23.8	36.8	65	45		81	72.2							36.8	25	61.1		15.8	26.3	40	68.4
	37	45	0	0		33.3	78.9		50	75		71.4	95	88.9		45	75	45	40		57.8	66.7							11.1	5.3	89.5		16.7	21	9.5	80
	26	39	0	0		40	75		35	70		53.3	85			65	50	60	63.2		70	61.9							21.1	21.1			36.8	42.1		65
	45	45	0	0					40	70		65	90.4			22.2	65	36.8	50		57.1	73.7								25			25	47.6		57.1
	25		0	0					33.3	71.4		66.7	75			35	75	36.8	50		50	63.2												40
	20											45	85			40	47.4	61.9	57.9		42.1	60												65
												61.9	75			42.1	45	35			70	50
																	55
																	60
																	71.4
Median	26.5	45	0	0		40	75		35	70		65	85	94.45		40	57.5	45	50		57.8	63.2							21.1	23.05	75.3		20.85	41.05	24.75	66.7
Mean	30	43.5	0	0		39.4333	66.3		37.38	71.28		62.6143	81.0429	94.45		39.0143	58.06	48.6429	51.0167		61.1429	63.9571							23	19.1	75.3		23.575	40.3333	24.75	67.625
																				Biological Replicate 3	70	60	47.6	85
																					19	57.9	50	57.1
																					30		57.1	66.6
																							40.9	71.4
																				Median	57.8	61.6	48.8	69
																				Mean	47.5886	61.2643	48.9	70.025
																				Biological Replicate 4	40	28.6	89.5	95.2
																							68.4	85
																							65	65
																							80.9	61.9
																							76.2	65
																				Median	n/a	n/a	66.7	69.5125
																				Mean	n/a	n/a	64.825	72.8156
