# Supplementary material for: Self-sperm induce resistance to the detrimental effects of sexual encounters with males in hermaphroditic nematodes
Source: eLife. 2019 Jul 8;8:e46418. doi: 10.7554/eLife.46418 (PMC6697445; doi:10.7554/eLife.46418)
Supplement: Supplementary file 1. — The complete list of all strains used in this study, with their genotype and source listed. [file elife-46418-supp1.xlsx]

## Sheet: List
	Supplementary File 1: Nematode strains used in this study
	Strain Name	Species	Genotype	Source
	N2	C. elegans	WT	Dr. Man-Wah Tan
	CF1903	C. elegans	glp-1(e2144)	Caenorhabditis Genetics Center
	CB1467	C. elegans	him-5(e1467)	Caenorhabditis Genetics Center
	MT14732	C. elegans	nIs128(Ppkd-2::GFP) II; him-8(e1489)	Dr. Robert Horvitz
	BA17	C. elegans	fem-1 (hc17)	Caenorhabditis Genetics Center
	CB4108	C. elegans	fog-2(q71)	Caenorhabditis Genetics Center
	JK816	C. elegans	fem-3(q20)	Caenorhabditis Genetics Center
	BA671	C. elegans	spe-9(hc88)	Caenorhabditis Genetics Center
	PX627	C. elegans	fxIs1[pie-1p::TIR1::mRuby, I:2851009]; spe-44(fx110[spe-44::degron]) IV	Dr. Patrick Phillips
	DG1604	C. elegans	fog-2(q71); ceh-18(mg57)	Caenorhabditis Genetics Center
	GR1034	C. elegans	ceh-18(mg57)	Caenorhabditis Genetics Center
	HK104	C. briggsae	WT	Dr. Abby Dernberg
	AF16	C. briggsae	WT	Caenorhabditis Genetics Center
	RE665	C. briggsae	Cbr-she-1(v35)	Dr. Ronald Ellis
	RE980	C. briggsae	Cbr-him-8(v186)	Dr. Ronald Ellis
	JU1018	C. briggsae	mfIs42[Cel-sid-2; Cel-myo-2::DsRed]	Caenorhabditis Genetics Center
	ABR156	C. briggsae	mfIs42[Cel-sid-2; Cel-myo-2::DsRed]; Cbr-she-1(v35)	this study
	PB2801	C. brenneri	WT	Caenorhabditis Genetics Center
	PB4641	C. remanei	WT	Caenorhabditis Genetics Center
