# Supplementary material for: Self-sperm induce resistance to the detrimental effects of sexual encounters with males in hermaphroditic nematodes
Source: eLife. 2019 Jul 8;8:e46418. doi: 10.7554/eLife.46418 (PMC6697445; doi:10.7554/eLife.46418)
Supplement: Supplementary file 2. — The data for the lifespan assays displayed in the figures as well as lifespan assays whose plots are not shown in the manuscript. Each set of lifespan assays performed together is separated from the other sets of assays by a blank row in the table. ‘Temp.’ describes the temperature at which the worms were grown. Note that 25→20 indicates that the hermaphrodites and feminized individuals were grown during development at the restrictive temperature and then shifted to a lower temperature on day 3 of life as described in the methods. All p-values were determined using Mantel-Cox log-ranking. [file elife-46418-supp2.xlsx]

## Sheet: List
	Supplementary Table 2: Lifespan Assay Results
	Strain/Treatment	Temp.	Median Lifespan	# Worms	# Censored	Log-Rank Test P-Value (Mantel-Cox)	Associated Fig.
	WT, N2 her (no males)	20	20	96	15		Fig. 1B
	WT, N2 her (+young, adult day 1 males for adulthood)	20	14	70	52	p < 0.0001 vs. WT, N2 her (no males)	Fig. 1B
	WT, N2 her (+middle-aged, adult day 5 males for adulthood)	20	17	73	30	p < 0.0001 vs. WT, N2 her (no males)	Fig. 1B
						p = 0.0003 vs. WT, N2 her (+young, adult day 1 males for adulthood)
	WT, N2 her (no males)	20	19	107	17		Fig. 1C and Fig. 1-supp. fig. 1A
	WT, N2 her (+males for adulthood)	20	14	106	23	p < 0.0001 vs. WT, N2 her (no males)	Fig. 1-supp. fig. 1A
	WT, N2 her (+2x males for 24 hours, day 3-4 of life)	20	18	102	20	p = 0.029 vs. WT, N2 her (no males)	Fig. 1C
						p < 0.0001 vs. WT, N2 her (+males for adulthood)
	WT, N2 her (mated only after 2 hours +males on day 3 of life)	20	23	82	47	p = 0.0717 (n.s.) vs. WT, N2 her (no males)	Fig. 1C
	WT, N2 her (no males)	20	22	108	17		Fig. 1D
	WT, N2 her (+males for adulthood)	20	14	106	44	p < 0.0001 vs. WT, N2 her (no males)	not shown
	WT, N2 her (+2x males for 24 hours, day 7-8 of life)	20	17	107	22	p < 0.0001 vs. WT, N2 her (no males)	Fig. 1D
						p < 0.0001 vs. WT, N2 her (+males for adulthood)
	WT, N2 her (mated only after 2 hours +males on day 7 of life)	20	17	99	56	p < 0.0001 vs. WT, N2 her (no males)	Fig. 1D
	WT, N2 her (no males)	20	23	109	20		not shown
	WT, N2 her (+males for adulthood)	20	16	111	43	p < 0.0001 vs. WT, N2 her (no males)	not shown
	WT, N2 her (+2x males for 24 hours, day 3-4 of life)	20	21	112	52	p = 0.0869 (n.s.) vs. WT, N2 her (no males)	not shown
	WT, N2 her (mated only after 2 hours +males on day 3 of life)	20	23	92	55	p = 0.8223 (n.s.) vs. WT, N2 her (no males)	not shown
	WT, N2 her (no males)	20	22	108	22		not shown
	WT, N2 her (+males for adulthood)	20	13	103	52	p < 0.0001 vs. WT, N2 her (no males)	not shown
	WT, N2 her (+2x males for 24 hours, day 7-8 of life)	20	19	105	17	p < 0.0001 vs. WT, N2 her (no males)	not shown
	WT, N2 her (mated only after 2 hours +males on day 7 of life)	20	17	91	47	p < 0.0001 vs. WT, N2 her (no males)	not shown
	WT, N2 (no males, COPAS sorted on day 3)	20	19	114	23		Fig. 1F
	WT, N2 (mated and COPAS sorted on day 3)	20	19	78	34	p = 0.3396 (n.s.) vs. WT, N2 (no males, COPAS sorted on day 3)	Fig. 1F
	WT, N2 (no males, COPAS sorted on day 7)	20	16	105	17		Fig. 1G
	WT, N2 (mated and COPAS sorted on day 7)	20	14	67	39	p < 0.0001 vs. WT, N2 (no males, COPAS sorted on day 7)	Fig. 1G
	WT, N2 (no males, COPAS sorted on day 3)	20	21	50	8		not shown
	WT, N2 (mated and COPAS sorted on day 3)	20	21	50	10	p = 0.7532 (n.s.) vs. WT, N2 (no males, COPAS sorted on day 3)	not shown
	WT, N2 (no males, COPAS sorted on day 7)	20	22	62	10		not shown
	WT, N2 (mated and COPAS sorted on day 7)	20	20	47	12	p = 0.0189 vs. WT, N2 (no males, COPAS sorted on day 7	not shown
	WT, N2 (no males, COPAS sorted on day 3)	20	19	216	81		not shown
	WT, N2 (mated and COPAS sorted on day 3)	20	19	51	42	p = 0.1845 (n.s.) vs. WT, N2 (no males, COPAS sorted on day 3)	not shown
	WT, N2 (no males, COPAS sorted on day 7)	20	19	215	121		not shown
	WT, N2 (mated and COPAS sorted on day 7)	20	16	66	44	p < 0.0001 vs. WT, N2 (no males, COPAS sorted on day 7)	not shown
	** This replicate was performed by an independent researcher
	WT, N2 her on mitotracker red CMXros for 24 hrs on day 3 of life	25	14	94	5		Fig. 1-supp. fig. 1E
	WT, N2 her on mitotracker red CMXros for 24 hrs on day 7 of life	25	16	97	3	p = 0.0091 vs. WT, N2 on MitoTracker Red CMXRos for 24 hours on day 3 of life	Fig. 1-supp. fig. 1E
	fem-1 her on mitotracker red CMXros for 24 hrs on day 3 of life	25	17	98	3		Fig. 1-supp. fig. 1F
	fem-1 her on mitotracker red CMXros for 24 hrs on day 7 of life	25	18	95	1	p = 0.6457 (n.s.) vs. fem-1 on MitoTracker Red CMXRos for 24 hrs on day 7 of life	Fig. 1-supp. fig. 1F
	WT, N2 her (no males, day 3)	25 -> 20	25	109	36		Fig. 2A and with Fig. 2E-I and Fig. 2-supp. fig. 2
	WT, N2 her (mated on day 3)	25 -> 20	25	52	21	p = 0.3204 (n.s.) vs. WT, N2 her (no males, day 3)	Fig. 2A and with Fig. 2E-I and Fig. 2-supp. fig. 2
	WT, N2 her (no males, day 7)	25 -> 20	24	80	8		Fig. 2B and with Fig. 2E-I and Fig. 2-supp. fig. 2
	WT, N2 her (mated on day 7)	25 -> 20	21	78	32	p = 0.0013 vs. WT, N2 her (no males, day 7)	Fig. 2B and with Fig. 2E-I and Fig. 2-supp. fig. 2
	fem-1 her (no males, day 3)	25 -> 20	30	105	19		Fig. 2C and with Fig. 2E-I and Fig. 2-supp. fig. 2
	fem-1 her (mated on day 3)	25 -> 20	25	76	27	p < 0.0001 vs. fem-1 her (no males, day 3)	Fig. 2C and with Fig. 2E-I and Fig. 2-supp. fig. 2
	fem-1 her (no males, day 7)	25 -> 20	29	107	18		Fig. 2D and with Fig. 2E-I and Fig. 2-supp. fig. 2
	fem-1 her (mated on day 7)	25 -> 20	24	62	12	p < 0.0001 vs. fem-1 her (no males, day 7)	Fig. 2D and with Fig. 2E-I and Fig. 2-supp. fig. 2
	WT, N2 her (no males, day 3)	25 -> 20	23	88	21		not shown, with Fig. 2E-I and Fig. 2-supp. fig. 2
	WT, N2 her (mated on day 3)	25 -> 20	19	33	15	p = 0.0804 (n.s.) vs. WT, N2 her (no males, day 3)	not shown, with Fig. 2E-I and Fig. 2-supp. fig. 2
	WT, N2 her (no males, day 7)	25 -> 20	27	100	13		not shown, with Fig. 2E-I and Fig. 2-supp. fig. 2
	WT, N2 her (mated on day 7)	25 -> 20	20	73	25	p < 0.0001 vs. WT, N2 her (no males, day 7)	not shown, with Fig. 2E-I and Fig. 2-supp. fig. 2
	fem-1 her (no males, day 3)	25 -> 20	30	88	18		not shown, with Fig. 2E-I and Fig. 2-supp. fig. 2
	fem-1 her (mated on day 3)	25 -> 20	25	94	34	p < 0.0001 vs. fem-1 her (no males, day 3)	not shown, with Fig. 2E-I and Fig. 2-supp. fig. 2
	fem-1 her (no males, day 7)	25 -> 20	29	105	30		not shown, with Fig. 2E-I and Fig. 2-supp. fig. 2
	fem-1 her (mated on day 7)	25 -> 20	27	56	14	p = 0.0009 vs. fem-1 her (no males, day 7)	not shown, with Fig. 2E-I and Fig. 2-supp. fig. 2
	WT, N2 her (no males, day 3)	25 -> 20	24	92	22		not shown, with Fig. 2E-I and Fig. 2-supp. fig. 2
	WT, N2 her (mated on day 3)	25 -> 20	22	60	29	p = 0.0234 vs. WT, N2 her (no males, day 3)	not shown, with Fig. 2E-I and Fig. 2-supp. fig. 2
	WT, N2 her (no males, day 7)	25 -> 20	24	68	18		not shown, with Fig. 2E-I and Fig. 2-supp. fig. 2
	WT, N2 her (mated on day 7)	25 -> 20	19	79	43	p = 0.0017 vs. WT, N2 her (no males, day 7)	not shown, with Fig. 2E-I and Fig. 2-supp. fig. 2
	fem-1 her (no males, day 3)	25 -> 20	27	96	21		not shown, with Fig. 2E-I and Fig. 2-supp. fig. 2
	fem-1 her (mated on day 3)	25 -> 20	24	93	35	p = 0.0005 vs. fem-1 her (no males, day 3)	not shown, with Fig. 2E-I and Fig. 2-supp. fig. 2
	fem-1 her (no males, day 7)	25 -> 20	31	92	14		not shown, with Fig. 2E-I and Fig. 2-supp. fig. 2
	fem-1 her (mated on day 7)	25 -> 20	24	84	18	p < 0.0001 vs. fem-1 her (no males, day 7)	not shown, with Fig. 2E-I and Fig. 2-supp. fig. 2
	WT, N2 her (no males, day 7)	25 -> 20	24	100	11		not shown, with Fig. 2E-I and Fig. 2-supp. fig. 2
	WT, N2 her (mated on day 7)	25 -> 20	20	59	19	p = 0.0303 vs. WT, N2 her (no males, day 7)	not shown, with Fig. 2E-I and Fig. 2-supp. fig. 2
	fem-1 her (no males, day 3)	25 -> 20	25	98	15		not shown, with Fig. 2E-I and Fig. 2-supp. fig. 2
	fem-1 her (mated on day 3)	25 -> 20	23	85	25	p = 0.0006 vs. fem-1 her (no males, day 3)	not shown, with Fig. 2E-I and Fig. 2-supp. fig. 2
	fem-1 her (no males, day 7)	25 -> 20	27	99	18		not shown, with Fig. 2E-I and Fig. 2-supp. fig. 2
	fem-1 her (mated on day 7)	25 -> 20	22	25	7	p < 0.0001 vs. fem-1 her (no males, day 7)	not shown, with Fig. 2E-I and Fig. 2-supp. fig. 2
	WT, N2 her (no males, day 3)	25 -> 20	18	95	18		not shown, with Fig. 2
	WT, N2 her (mated on day 3)	25 -> 20	21	101	35	p = 0.5012 (n.s.) vs. WT, N2 her (no males, day 3)	not shown, with Fig. 2
	WT, N2 her (no males, day 7)	25 -> 20	21	105	12		not shown, with Fig. 2
	WT, N2 her (mated on day 7)	25 -> 20	22	80	21	p = 0.5281 (n.s.) vs. WT, N2 her (no males, day 7)	not shown, with Fig. 2
	fem-1 her (no males, day 3)	25 -> 20	28	103	29		not shown, with Fig. 2
	fem-1 her (mated on day 3)	25 -> 20	23	103	32	p < 0.0001 vs. fem-1 her (no males, day 3)	not shown, with Fig. 2
	fem-1 her (no males, day 7)	25 -> 20	32	105	21		not shown, with Fig. 2
	fem-1 her (mated on day 7)	25 -> 20	27	93	19	p < 0.0001 vs. fem-1 her (no males, day 7)	not shown, with Fig. 2
	WT, N2 her (no males, day 3)	25	14	58	3		not shown, with Fig. 2
	WT, N2 her (mated on day 3)	25	14	34	2	p = 0.9109 (n.s.) vs. WT, N2 her (no males, day 3)	not shown, with Fig. 2
	fem-1 her (no males, day 3)	25	17	65	1		not shown, with Fig. 2
	fem-1 her (mated on day 3)	25	16	65	3	p = 0.0025 vs. fem-1 her (no males, day 3)	not shown, with Fig. 2
	fog-2 her (no males, day 3)	20	24	219	79		Fig. 2-supp. Fig. 1A
	fog-2 her (mated on day 3)	20	20	192	50	p < 0.0001 vs. fog-2 her (no males, day 3)	Fig. 2-supp. Fig. 1A
	fog-2 her (no males, day 7)	20	22	184	99		Fig. 2-supp. Fig. 1B
	fog-2 her (mated on day 7)	20	17	128	53	p < 0.0001 vs. fog-2 her (no males, day 7)	Fig. 2-supp. Fig. 1B
	fog-2 her (no males, day 3)	20	22	108	39		not shown
	fog-2 her (mated on day 3)	20	20	48	9	p = 0.0020 vs. fog-2 her (no males, day 3)	not shown
	fog-2 her (no males, day 7)	20	19	105	30		not shown
	fog-2 her (mated on day 7)	20	11	39	11	p < 0.0001 vs. fog-2 her (no males, day 7)	not shown
	fog-2 her (no males)	20	24	64	15		not shown
	fog-2 her (mated on day 3)	20	20	11	1	p = 0.0166 vs. fog-2 her (no males)	not shown
	fog-2 her (mated on day 7)	20	18	29	15	p = 0.0003 vs. fog-2 her (no males)	not shown
	WT, N2 her (no males, day 3)	25	14	106	12		not shown
	WT, N2 her (mated on day 3)	25	13	29	2	p = 0.3309 (n.s.) vs. WT, N2 her (no males, day 3)	not shown
	WT, N2 her (no males, day 6)	25	16	110	1		not shown
	WT, N2 her (mated on day 6)	25	13	68	4	p < 0.0001 vs. WT, N2 her (no males, day 6)	not shown
	glp-1 her (no males, day 3)	25	15	106	4		not shown
	glp-1 her (mated on day 3)	25	14	85	0	p = 0.0002 vs. glp-1 her (no males, day 3)	not shown
	glp-1 her (no males, day 6)	25	17	106	4		not shown
	glp-1 her (mated on day 6)	25	16	94	2	p < 0.0001 vs. glp-1 her (no males, day 6)	not shown
	glp-1 her (no males, day 3)	25	16	100	1		not shown
	glp-1 her (mated on day 3)	25	13	86	4	p < 0.0001 vs. glp-1 her (no males, day 3)	not shown
	glp-1 her (no males, day 6)	25	17	108	5		not shown
	glp-1 her (mated on day 6)	25	15	76	4	p = 0.0009 vs. glp-1 her (no males, day 6)	not shown
	WT, N2 her (no males, day 3)	25	13	40	4		not shown
	WT, N2 her (mated on day 3)	25	13	32	8	p = 0.4436 vs. WT, N2 her (no males, day 3)	not shown
	WT, N2 her (no males, day 7)	25	17	36	4		not shown
	WT, N2 her (mated on day 7)	25	13	32	1	p = 0.0019 vs. WT, N2 her (no males, day 7)	not shown
	glp-1 her (no males, day 3)	25	17	51	12		not shown
	glp-1 her (mated on day 3)	25	15	51	7	p < 0.0001 vs. glp-1 her (no males, day 3)	not shown
	glp-1 her (no males)	25	17	113	4		Fig. 2-supp. Fig. 1C
	glp-1 her (+males for adulthood)	25	14	98	3	p < 0.0001 vs. glp-1 her (no males)	not shown, with fig. 2C
	glp-1 her (+2x males for 24 hours, day 2-3 of life)	25	14	83	6	p < 0.0001 vs. glp-1 her (no males)	not shown, with fig. 2C
						p = 0.0059 vs. glp-1 her (+males for adulthood)
	glp-1 her (mated only after 2 hours +males on day 3 of life)	25	15	58	4	p = 0.0004 vs. glp-1 her (no males)	Fig. 2-supp. Fig. 1C
	glp-1 her (no males)	25	17	110	2		Fig. 2-supp. Fig. 1D
	glp-1 her (+males for adulthood)	25	13	111	3	p < 0.0001 vs. glp-1 her (no males)	not shown, with Fig. 2-supp. Fig. 1D
	glp-1 her (+2x males for 24 hours, day 6-7 of life)	25	16	81	3	p < 0.0001 vs. glp-1 her (no males)	not shown, with Fig. 2-supp. Fig. 1D
						p < 0.0001 vs. glp-1 her (+males for adulthood)
	glp-1 her (mated only after 2 hours +males on day 7 of life)	25	16	40	0	p = 0.0003 vs. glp-1 her (no males)	Fig. 2-supp. Fig. 1D
	fem-3 her (no males, day 3)	25	13	116	6		not shown
	fem-3 her (mated on day 3)	25	13	61	1	p = 0.2132 (n.s.) vs. fem-3 her (no male, day 3)	not shown
	fem-3 her (no males, day 6)	25	13	110	1		not shown
	fem-3 her (mated on day 6)	25	13	69	1	p = 0.831 (n.s.) vs. fem-3 her (no males, day 6)	not shown
	WT, N2 her (no males, day 3)	25	14	109	8		not shown
	WT, N2 her (mated on day 3)	25	14	12	2	p = 0.4922 (n.s.) vs. WT, N2 her (no males, day 3)	not shown
	WT, N2 her (no males, day 6)	25	13	114	31		not shown
	WT, N2 her (mated on day 6)	25	13	39	1	p = 0.0177 vs. WT, N2 her (no males, day 6)	not shown
	WT, N2 her (no males, day 3)	25	14	110	23		Fig. 3A
	WT, N2 her (mated on day 3)	25	14	31	1	p = 0.7250 (n.s.) vs. WT, N2 her (no males, day 3)	Fig. 3A
	WT, N2 her (no males, day 6)	25	14	109	9		Fig. 3B and Fig. 3-supp. fig. 1A
	WT, N2 her (mated on day 6)	25	13	47	0	p < 0.0001 vs. WT, N2 her (no males, day 6)	Fig. 3B
	WT, N2 her (+males for adulthood)	25	12	103	8	p < 0.0001 vs. WT, N2 her (no males, day 6)	Fig. 3-supp. fig. 1A
	fem-3 her (no males, day 3)	25	14	113	2		Fig. 3C
	fem-3 her (mated on day 3)	25	14	60	31	p = 0.2099 (n.s.) vs. fem-3 her (no males, day 3)	Fig. 3C
	fem-3 her (no males, day 6)	25	13	108	7		Fig. 3D and Fig. 3-supp. fig. 1B
	fem-3 her (mated on day 6)	25	14	68	8	p = 0.028 vs. fem-3 her (no males, day 6)	Fig. 3D
	fem-3 her (+males for adulthood)	25	12	111	7	p < 0.0001 vs. fem-3 her (no males, day 6)	Fig. 3-supp. fig. 1B
	spe-9 her (no males, day 3)	25	15	59	2		Fig. 3E
	spe-9 her (mated on day 3)	25	13	61	15	p = 0.1699 (n.s.) vs. spe-9 her (no males, day 3)	Fig. 3E
	spe-9 her (no males, day 7)	25	15	57	0		Fig. 3F
	spe-9 her (mated on day 7)	25	15	47	2	p < 0.0001 vs. spe-9 her (no males, day 7)	Fig. 3F
	WT, N2 her (no males, day 3)	25	13	46	2		not shown, with Fig. 3E,F
	WT, N2 her (mated on day 3)	25	13	32	4	p = 0.8141 (n.s.) vs. WT, N2 her (no males, day 3)	not shown, with Fig. 3E,F
	WT, N2 her (no males, day 7)	25	15	53	2		not shown, with Fig. 3E,F
	WT, N2 her (mated on day 7)	25	13	33	0	p = 0.0052 vs. WT, N2 her (no males, day 7)	not shown, with Fig. 3E,F
	spe-9 her (no males, day 3)	25	13	108	6		not shown
	spe-9 her (mated on day 3)	25	13	41	4	p = 0.9430 (n.s.) vs. spe-9 her (no males, day 3)	not shown
	spe-9 her (no males, day 6)	25	12	108	1		not shown
	spe-9 her (mated on day 6)	25	12	41	1	p = 0.0203 vs. spe-9 her (no males, day 6)	not shown
	spe-44::degron her (no males, no auxin [essentially WT])	20	20	104	8		Fig. 3-supp. fig. 1C
	spe-44::degron her (mated on day 3, no auxin [essentially WT])	20	22	46	23	p = 0.2374 (n.s.) vs. spe-44::degron her (no males, no auxin [essentially WT])	Fig. 3-supp. fig. 1C
	spe-44::degron her (no males, 1mM auxin to induce SPE-44 degradation)	20	24	112	16	p < 0.0001 vs. spe-44::degron her (no males, no auxin [essentially WT])	Fig. 3-supp. fig. 1D
	spe-44::degron her (mated on day 3, 1mM auxin to induce SPE-44 degradation)	20	20	97	30	p = 0.0303 vs. spe-44::degron her (no males, 1mM auxin to induce SPE-44 degradation)	Fig. 3-supp. fig. 1D
	spe-44::degron her (no males, no auxin [essentially WT])	20	17	104	19		not shown
	spe-44::degron her (mated on day 3, no auxin [essentially WT])	20	19	39	20	p = 0.1036 (n.s.) vs. spe-44::degron her (no males, no auxin [essentially WT])	not shown
	spe-44::degron her (no males, 1mM auxin to induce SPE-44 degradation)	20	24	98	6	p < 0.0001 vs. spe-44::degron her (no males, no auxin [essentially WT])	not shown
	spe-44::degron her (mated on day 3, 1mM auxin to induce SPE-44 degradation)	20	21	78	13	p = 0.0093 vs. spe-44::degron her (no males, 1mM auxin to induce SPE-44 degradation)	not shown
	spe-44::degron her (no males, 1mM auxin to induce SPE-44 degradation)	20	23	144	26		Fig. 3G
	spe-44::degron her (mated on day 3, 1mM auxin to induce SPE-44 degradation)	20	20	93	28	p = 0.0001 vs. spe-44::degron her (no males, 1mM auxin to induce SPE-44 degradation)	Fig. 3G
	fog-2 on ctrl. (EV) RNAi (no males)	20	22	109	21		Fig. 4B
	fog-2 on ctrl. (EV) RNAi (mated on day 4)	20	20	94	40	p = 0.0001 vs. fog-2 on ctrl. (EV) RNAi (no males)	Fig. 4B
	fog-2; ceh-18 on vab-1 RNAi (no males)	20	20	101	13		Fig. 4C
	fog-2; ceh-18 on vab-1 RNAi (mated on day 4)	20	18	86	25	p = 0.2356 (n.s.) vs. fog-2; ceh-18 on vab-1 RNAi (no males)	Fig. 4C
	fog-2 on ctrl. (EV) RNAi (no males)	20	25	105	16		not shown
	fog-2 on ctrl. (EV) RNAi (mated on day 4)	20	18	135	53	p < 0.0001 vs. fog-2 on ctrl. (EV) RNAi (no males)	not shown
	fog-2; ceh-18 on vab-1 RNAi (no males)	20	19	141	19		not shown
	fog-2; ceh-18 on vab-1 RNAi (mated on day 4)	20	18	130	40	p = 0.0185 vs. fog-2; ceh-18 on vab-1 RNAi (no males)	not shown
	fog-2 on ctrl. (EV) RNAi (no males)	20	24	111	8		not shown
	fog-2 on ctrl. (EV) RNAi (mated on day 4)	20	18	93	23	p < 0.0001 vs. fog-2 on ctrl. (EV) RNAi (no males)	not shown
	fog-2; ceh-18 on vab-1 RNAi (no males)	20	18	111	8		not shown
	fog-2; ceh-18 on vab-1 RNAi (mated on day 4)	20	20	51	18	p = 0.2309 (n.s.) vs. fog-2; ceh-18 on vab-1 RNAi (no males)	not shown
	WT, N2 her on ctrl. (EV) RNAi (no males)	20	20	94	14		Fig. 4D
	WT, N2 her on ctrl. (EV) RNAi (mated on day 7)	20	16	86	45	p < 0.0001 vs. WT, N2 her on ctrl. RNAi (no males)	Fig. 4D
	ceh-18 her on vab-1 RNAi (no males)	20	17	98	16		Fig. 4E
	ceh-18 her on vab-1 RNAi (mated on day 7)	20	20	115	27	p = 0.7422 (n.s.) vs. ceh-18 her on vab-1 RNAi (no males)	Fig. 4E
	WT, N2 her on ctrl. (EV) RNAi (no males)	20	19	109	24		not shown
	WT, N2 her on ctrl. (EV) RNAi (mated on day 7)	20	15	46	12	p < 0.0001 vs. WT, N2 her on ctrl. RNAi (no males)	not shown
	ceh-18 her on vab-1 RNAi (no males)	20	17	108	18		not shown
	ceh-18 her on vab-1 RNAi (mated on day 7)	20	17	76	7	p = 0.1749 (n.s.) vs. ceh-18 her on vab-1 RNAi (no males)	not shown
	WT, N2 her on ctrl. (EV) RNAi (no males)	20	17	108	19		not shown
	WT, N2 her on ctrl. (EV) RNAi (mated on day 7)	20	14	59	36	p = 0.0002 vs. WT, N2 her on ctrl. RNAi (no males)	not shown
	ceh-18 her on vab-1 RNAi (no males)	20	17	108	17		not shown
	ceh-18 her on vab-1 RNAi (mated on day 7)	20	17	100	15	p = 0.2663 (n.s.) vs. ceh-18 her on vab-1 RNAi (no males)	not shown
	** This replicate was performed by an independent researcher
	WT PB2801 C. brenneri females (no males)	20	22	103	32		Fig. 5B
	WT PB2801 C. brenneri females (mated on day 4)	20	22	126	50	p = 0.8285 (n.s.) vs. C. brenneri females (no males)	Fig. 5B
	WT PB2801 C. brenneri females (mated on day 10)	20	24	98	41	p = 0.2569 (n.s.) vs. C. brenneri females (no males)	Fig. 5B
	WT PB2801 C. brenneri females (+ males for lifetime)	20	16	107	34	p < 0.0001 vs. C. brenneri females (no males)	not shown, with Fig. 5B
	WT PB2801 C. brenneri females (no males)	20	23	107	16		not shown
	WT PB2801 C. brenneri females (mated on day 4)	20	20	95	25	p = 0.0012 vs. C. brenneri females (no males)	not shown
	WT PB2801 C. brenneri females (mated on day 10)	20	22	100	25	p = 0.0319 vs. C. brenneri females (no males)	not shown
	WT PB2801 C. brenneri females (+ males for lifetime)	20	17	107	39	p < 0.0001 vs. C. brenneri females (no males)	not shown
	WT PB2801 C. brenneri females (no males)	20	24	135	35		Supp. Fig. 6A
	WT PB2801 C. brenneri females (2 hours mated on day 4)	20	21	104	55	p = 0.1167 (n.s.) vs. C. brenneri females (no males)	not shown, with Fig. 5-supp. fig. 1A
	WT PB2801 C. brenneri females (6 hours mated on day 4)	20	24	98	35	p = 0.0157 vs. C. brenneri females (no males)	not shown, with Fig. 5-supp. fig. 1A
	WT PB2801 C. brenneri females (24 hours mated on day 4-5)	20	21	97	37	p = 0.0011 vs. C. brenneri females (no males)	Fig. 5-supp. fig. 1A
	WT PB2801 C. brenneri females (3 days mated on day 4-7)	20	19	86	22	p < 0.0001 vs. C. brenneri females (no males)	Fig. 5-supp. fig. 1A
						p = 0.0019 vs. C. brenneri females (24 hours mated on day 4-5)
	WT PB2801 C. brenneri females (+ males for lifetime)	20	19	79	29	p < 0.0001 vs. C. brenneri females (no males)	Fig. 5-supp. fig. 1A
	WT PB4641 C. remanei females (no males)	20	35	86	25		Fig. 5-supp. fig. 1B
	WT PB4641 C. remanei females (mated on day 4)	20	33	111	50	p = 0.8016 (n.s.) vs. C. remanei females (no males)	Fig. 5-supp. fig. 1B
	WT PB4641 C. remanei females (mated on day 11)	20	35	83	14	p = 0.5159 (n.s.) vs. C. remanei females (no males)	Fig. 5-supp. fig. 1B
	WT PB4641 C. remanei females (mated on day 18)	20	33	95	17	p = 0.8442 (n.s.) vs. C. remanei females (no males)	Fig. 5-supp. fig. 1B
	WT PB4641 C. remanei females (+ males for lifetime)	20	24	100	21	p < 0.0001 vs. C. remanei females (no males)	Fig. 5-supp. fig. 1B
	WT, HK104 C. briggsae (no males)	20	29	144	42		Fig. 5C
	WT, HK104 C. briggsae (mated, day 3)	20	29	82	51	p = 0.9648 (n.s.) vs. WT, HK104 C. briggsae (no males)	Fig. 5C
	WT, HK104 C. briggsae (mated, day 8)	20	20	97	38	p < 0.0001 vs. WT, HK104 C. briggsae (no males)	Fig. 5C
	she-1 her C. briggsae (no males)	20	16	141	73		Fig. 5D
	she-1 her C. briggsae (mated on day 3)	20	14	98	58	p < 0.0001 vs. she-1 her C. briggsae (no males)	Fig. 5D
	she-1 her C. briggsae (mated on day 8)	20	16	23	13	p = 0.0341 vs. she-1 her C. briggsae (no males)	not shown
	WT, HK104 C. briggsae (no males)	20	25	145	38		not shown
	WT, HK104 C. briggsae (mated, day 3)	20	27	85	41	p = 0.2928 (n.s.) vs. WT, HK104 C. briggsae (no males)	not shown
	WT, HK104 C. briggsae (mated, day 8)	20	20	121	49	p < 0.0001 vs. WT, HK104 C. briggsae (no males)	not shown
	she-1 her C. briggsae (no males)	20	16	137	42		not shown
	she-1 her C. briggsae (mated on day 4)	20	14	107	56	p < 0.0001 vs. she-1 her C. briggsae (no males)	not shown
	WT, AF16 C. briggsae (no males); 3 independent experiments	20	22	394	311		Fig. 5-supp. fig. 1C
	WT, AF16 C. briggsae (mated, day 3 or 4); 3 independent experiments	20	20	280	247	p = 0.0093 vs. WT, AF16 C. briggsae (no males)	Fig. 5-supp. fig. 1C
						p < 0.0001 vs. WT, AF16 C. briggsae (mated, day 7 or 8)
	WT, AF16 C. briggsae (mated, day 7 or 8); 3 independent experiments	20	17	425	269	p < 0.0001 vs. WT, AF16 C. briggsae (no males)	Supp. Fig. 6C
	WT, AF16 C. briggsae (no males)	20	20	141	121		part of data in Fig. 5-supp. fig. 1C
	WT, AF16 C. briggsae (mated, day 3)	20	20	98	90	p = 0.7723 (n.s.) vs. WT, AF16 C. briggsae (no males)	part of data in Fig. 5-supp. fig. 1C
	WT, AF16 C. briggsae (mated, day 7)	20	18	92	59	p = 0.0002 vs. WT, AF16 C. briggsae (no males)	part of data in Fig. 5-supp. fig. 1C
	WT, AF16 C. briggsae (no males)	20	22	146	113		part of data in Fig. 5-supp. fig. 1C
	WT, AF16 C. briggsae (mated, day 4)	20	20	17	97	p = 0.0503 vs. WT, AF16 C. briggsae (no males)	part of data in Fig. 5-supp. fig. 1C
	WT, AF16 C. briggsae (mated, day 7)	20	16	150	104	p < 0.0001 vs. WT, AF16 C. briggsae (no males)	part of data in Fig. 5-supp. fig. 1C
	WT, AF16 C. briggsae (no males)	20	24	107	77		part of data in Fig. 5-supp. fig. 1C
	WT, AF16 C. briggsae (mated, day 3)	20	20	75	60	p = 0.0343 vs. WT, AF16 C. briggsae (no males)	part of data in Fig. 5-supp. fig. 1C
	WT, AF16 C. briggsae (mated, day 7)	20	19	115	71	p < 0.0001 vs. WT, AF16 C. briggsae (no males)	part of data in Fig. 5-supp. fig. 1C
	WT, AF16 C. briggsae (mated, day 8)	20	17	68	35	p < 0.0001 vs. WT, AF16 C. briggsae (no males)	part of data in Fig. 5-supp. fig. 1C
	Ingested RNAi+ JU1018 C. briggsae on ctrl. (EV) RNAi (no males)	20	22	151	93		Fig. 5E
	Ingested RNAi+ JU1018 C. briggsae on ctrl. (EV) RNAi (mated, day 8)	20	19	129	58	p < 0.0001 vs. JU1018 C. briggsae on ctrl. (EV) RNAi (no males)	Fig. 5E
	Ingested RNAi+ JU1018 C. briggsae on Cbr-ceh-18 & Cbr-vab-1 RNAi (no males)	20	24	143	81		Fig. 5F
	Ingested RNAi+ JU1018 C. briggsae on Cbr-ceh-18 & Cbr-vab-1 RNAi (mated, day 8)	20	24	135	95	p = 0.2290 (n.s.) vs. JU1018 C. briggsae on Cbr-ceh-18 & Cbr-vab-1 RNAi (mated, day 8)	Fig. 5F
	Ingested RNAi+ JU1018 C. briggsae on ctrl. (EV) RNAi (no males)	20	23	113	48		not shown
	Ingested RNAi+ JU1018 C. briggsae on ctrl. (EV) RNAi (mated, day 8)	20	21	91	29	p = 0.0005 vs. JU1018 C. briggsae on ctrl. (EV) RNAi (no males)	not shown
	Ingested RNAi+ JU1018 C. briggsae on Cbr-ceh-18 & Cbr-vab-1 RNAi (no males)	20	26	102	44		not shown
	Ingested RNAi+ JU1018 C. briggsae on Cbr-ceh-18 & Cbr-vab-1 RNAi (mated, day 8)	20	24	94	57	p = 0.0792 (n.s.) vs. JU1018 C. briggsae on Cbr-ceh-18 & Cbr-vab-1 RNAi (mated, day 8)	not shown
	Ingested RNAi+ JU1018 C. briggsae on ctrl. (EV) RNAi (no males)	20	24	106	58		not shown
	Ingested RNAi+ JU1018 C. briggsae on ctrl. (EV) RNAi (mated, day 8)	20	19	110	50	p < 0.0001 vs. JU1018 C. briggsae on ctrl. (EV) RNAi (no males)	not shown
	Ingested RNAi+ JU1018 C. briggsae on Cbr-ceh-18 & Cbr-vab-1 RNAi (no males)	20	23	108	42		not shown
	Ingested RNAi+ JU1018 C. briggsae on Cbr-ceh-18 & Cbr-vab-1 RNAi (mated, day 8)	20	21	116	93	p = 0.1167 (n.s.) vs. JU1018 C. briggsae on Cbr-ceh-18 & Cbr-vab-1 RNAi (mated, day 8)	not shown
