# Supplementary material for: Self-sperm induce resistance to the detrimental effects of sexual encounters with males in hermaphroditic nematodes
Source: eLife. 2019 Jul 8;8:e46418. doi: 10.7554/eLife.46418 (PMC6697445; doi:10.7554/eLife.46418)
Supplement: Supplementary file 3. — The mating efficiencies performed. The individuals whose mating efficiencies were measured are underlined in each set of mating partners. Successful mating was determined by the presence of fluorescent male sperm in the spermatheca or uterus. The presence of fluorescent male sperm is indicative of fertilization (see Figure 1—figure supplement 1B,C) though this was not specifically measured in this assay. See Source data 1 for a complete list of the mating efficiencies for each plate of 20 hermaphrodites (or germline mutants) with 40 males that were used to calculate the median and p-values. [file elife-46418-supp3.xlsx]

## Sheet: List
	Supplementary File 3
	Mating Efficiencies: percentage that mated with males in 2 hours
	Mating partners	Median	n	p-value (Mann Whitney test)
	Young (day 3) hermaphrodite x young (day 3) him-5 males	31.6	9
	Middle-aged (day 7) hermaphrodite x young (day 3) him-5 males	45	4	p = 0.1119 (young vs. middle-aged hermaphrodites with young males)
	Young (day 3) hermaphrodite x middle-aged (day 7) him-5 males	0	7	p = 0.0002 (young hermaphrodites mated with young vs. middle-aged males)
	Middle-aged (day 7) hermaphrodite x middle-aged (day 7) him-5 males	0	5	p = 0.0079 (middle-aged hermaphrodites mated with young vs. middle-aged males)
				p = 0.4697 (young vs. middle-aged hermaphrodites mated with middle-aged males)
	Young (day 3) hermaphrodite x young (day 4) him-5 males	33.3	10
	Middle-aged (day 3) hermaphrodite x young (day 4) him-5 males	68.65	10	p < 0.0001 (young vs. middle-aged)
	Young (day 3) hermaphrodite x young (day 4) him-5 males	37.5	12
	Young (day 3) feminized (fog-2) x young (day 4) him-5 males	71.4	11	p < 0.0001 (hermaphrodite vs. feminized)
	Young (day 3) hermaphrodite x young (day 4) him-5 males	54.15	14
	Young (day 3) feminized (fem-1) x young (day 4) him-5 males	75	14	p = 0.0068 (hermaphrodite vs. feminized)
	Young (day 3) germline-less (glp-1) x young (day 4) him-5 males	71.4	9	p = 0.0435 (hermaphrodite vs. germline-less)
	Young (day 3) hermaphrodite x young (day 4) him-5 males	37.5	10
	Young (day 3) feminized (fem-1) x young (day 4) him-5 males	60	11	p = 0.0094 (young hermaphrodite vs. young feminized)
	Middle-aged (day 7) hermaphrodite x young (day 4) him-5 males	52.3	11	p = 0.0747 (young vs. middle-aged)
	Middle-aged (day 7) feminized (fem-1) x young (day 4) him-5 males	45	10	p = 0.0225 (young vs. middle-aged)
				p = 0.1179 (middle-aged hermaphrodite vs. middle-aged feminized)
	Young (day 3) hermaphrodite x young (day 4) him-5 males	50	18
	Young (day 3) masculinized (fem-3) x young (day 4) him-5 males	60	17	p = 0.2540 (young hermaphrodite vs. young feminized)
	Middle-aged (day 6) hermaphrodite x young (day 4) him-5 males	65	9	p = 0.0818 (young vs. middle-aged)
	Middle-aged (day 6) masculinized (fem-3) x young (day 4) him-5 males	66.6	9	p = 0.0113 (young vs. middle-aged)
				p = 0.3061 (middle-aged hermaphrodite vs. middle-aged masculinized)
	Young (day 3) spe-44::degron without auxin x young (day 4) him-5 males	31.6	7
	Young (day 3) spe-44::degron on 1mM auxin x young (day 4) him-5 males	55	7	p = 0.0006 (without auxin vs. 1mM auxin during development)
	Young (day 4) C. briggsae hermaphrodite (HK104) x young Cbr-him-5 males	29.7	8
	Young (day 4) C. briggsae hermaphrodite (AF16) x young Cbr-him-5 males	35	8	p = 0.5562 (HK104 vs. AF16)
	Young (day 4) C. briggsae feminized (she-1) x young Cbr-him-5 males	75	7	p = 0.0003 (HK104 hermaphrodite vs. feminized)
				p = 0.0006 (AF16 hermaprodite vs. feminized)
	Young (day 4) C. briggsae hermaphrodite (HK104) x young Cbr-him-5 males	20	7
	Middle-aged (day 8) C. briggsae hermaphrodite (HK104) x young Cbr-him-5 males	47.6	9	p = 0.0019 (young vs. middle-aged)
	Young (day 4) C. briggsae hermaphrodite (AF16) x young Cbr-him-5 males	32.5	4
	Middle-aged (day 8) C. briggsae hermaphrodite (AF16) x young Cbr-him-5 males	67.55	6	p = 0.0095 (young vs. middle-aged)
