# Supplementary figures and images for: Self-sperm induce resistance to the detrimental effects of sexual encounters with males in hermaphroditic nematodes
Source: eLife journal article supplement (doi:10.7554/elife.46418), 2019-07-08

Figure 2-figure supplement 1

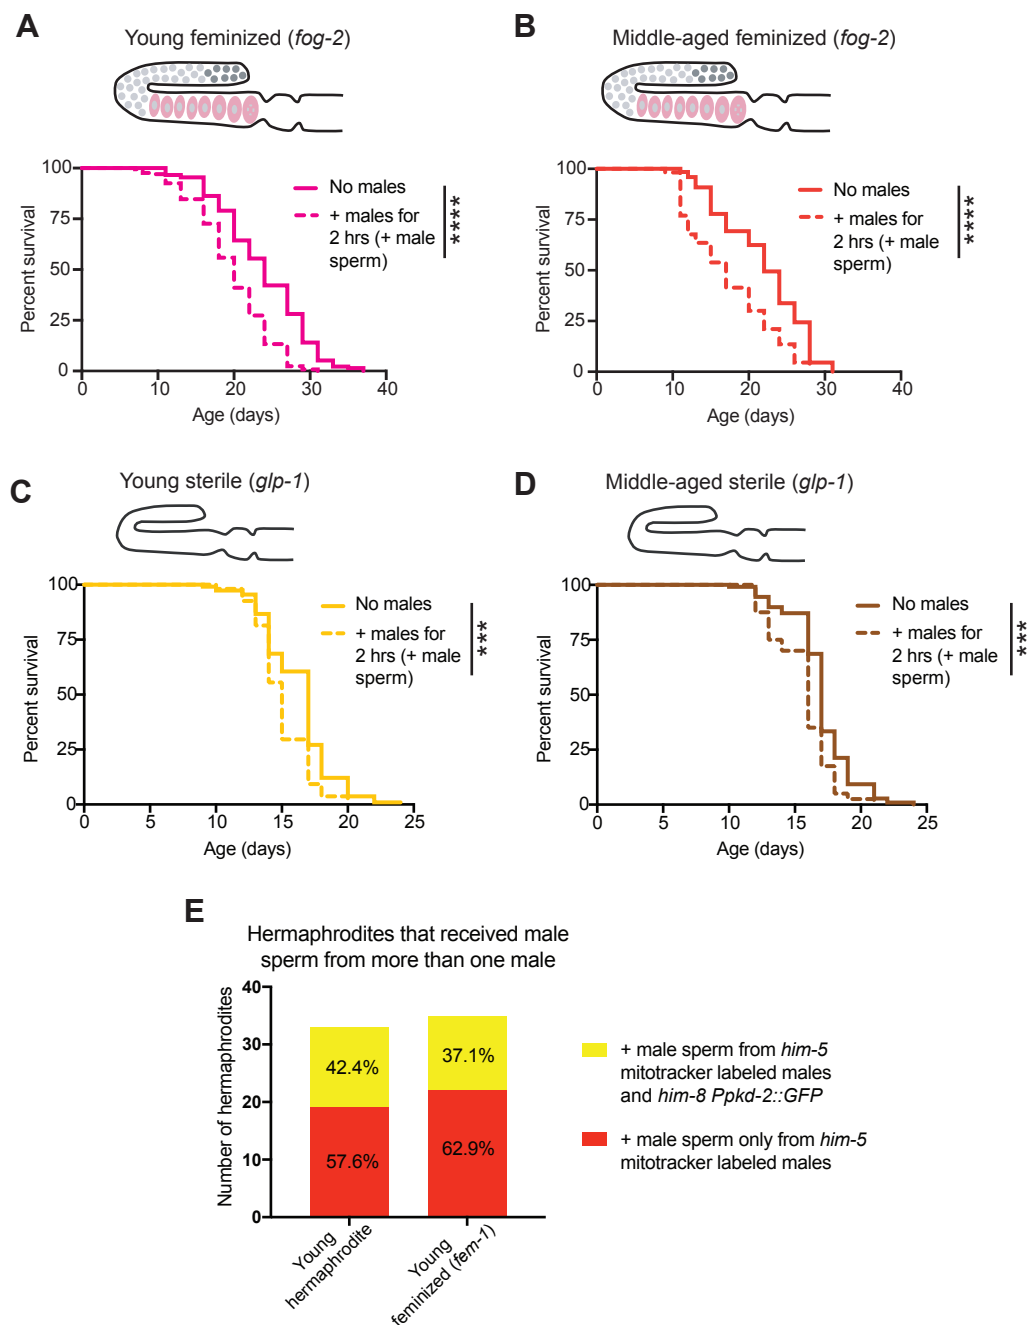

Supplement: supp [file elife-46418-supp-v1.zip]

Figure 1-figure supplement 1

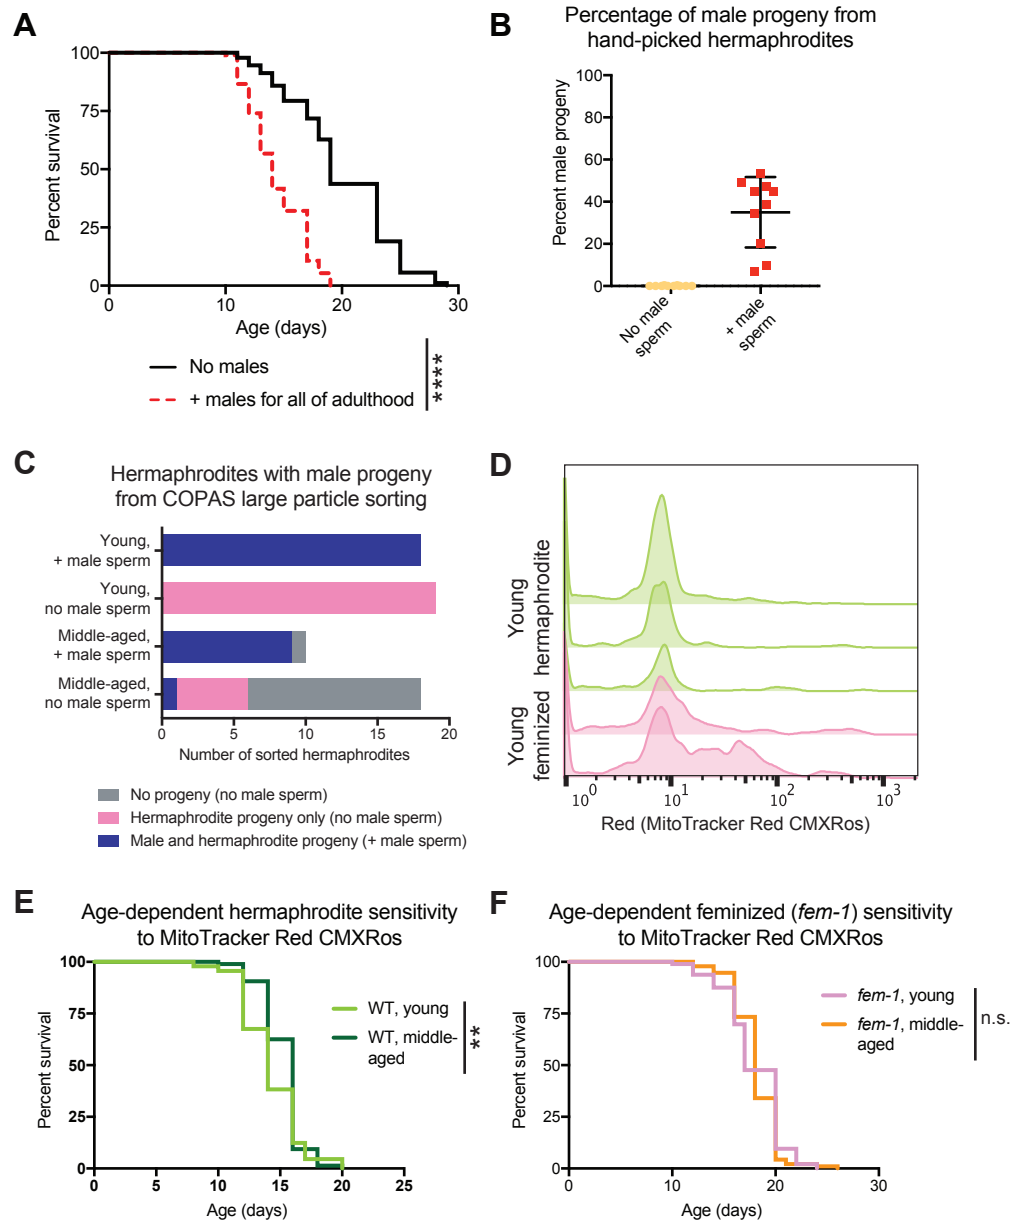

Supplement: supp [file elife-46418-supp-v1.zip]

Figure 5-figure supplement 3

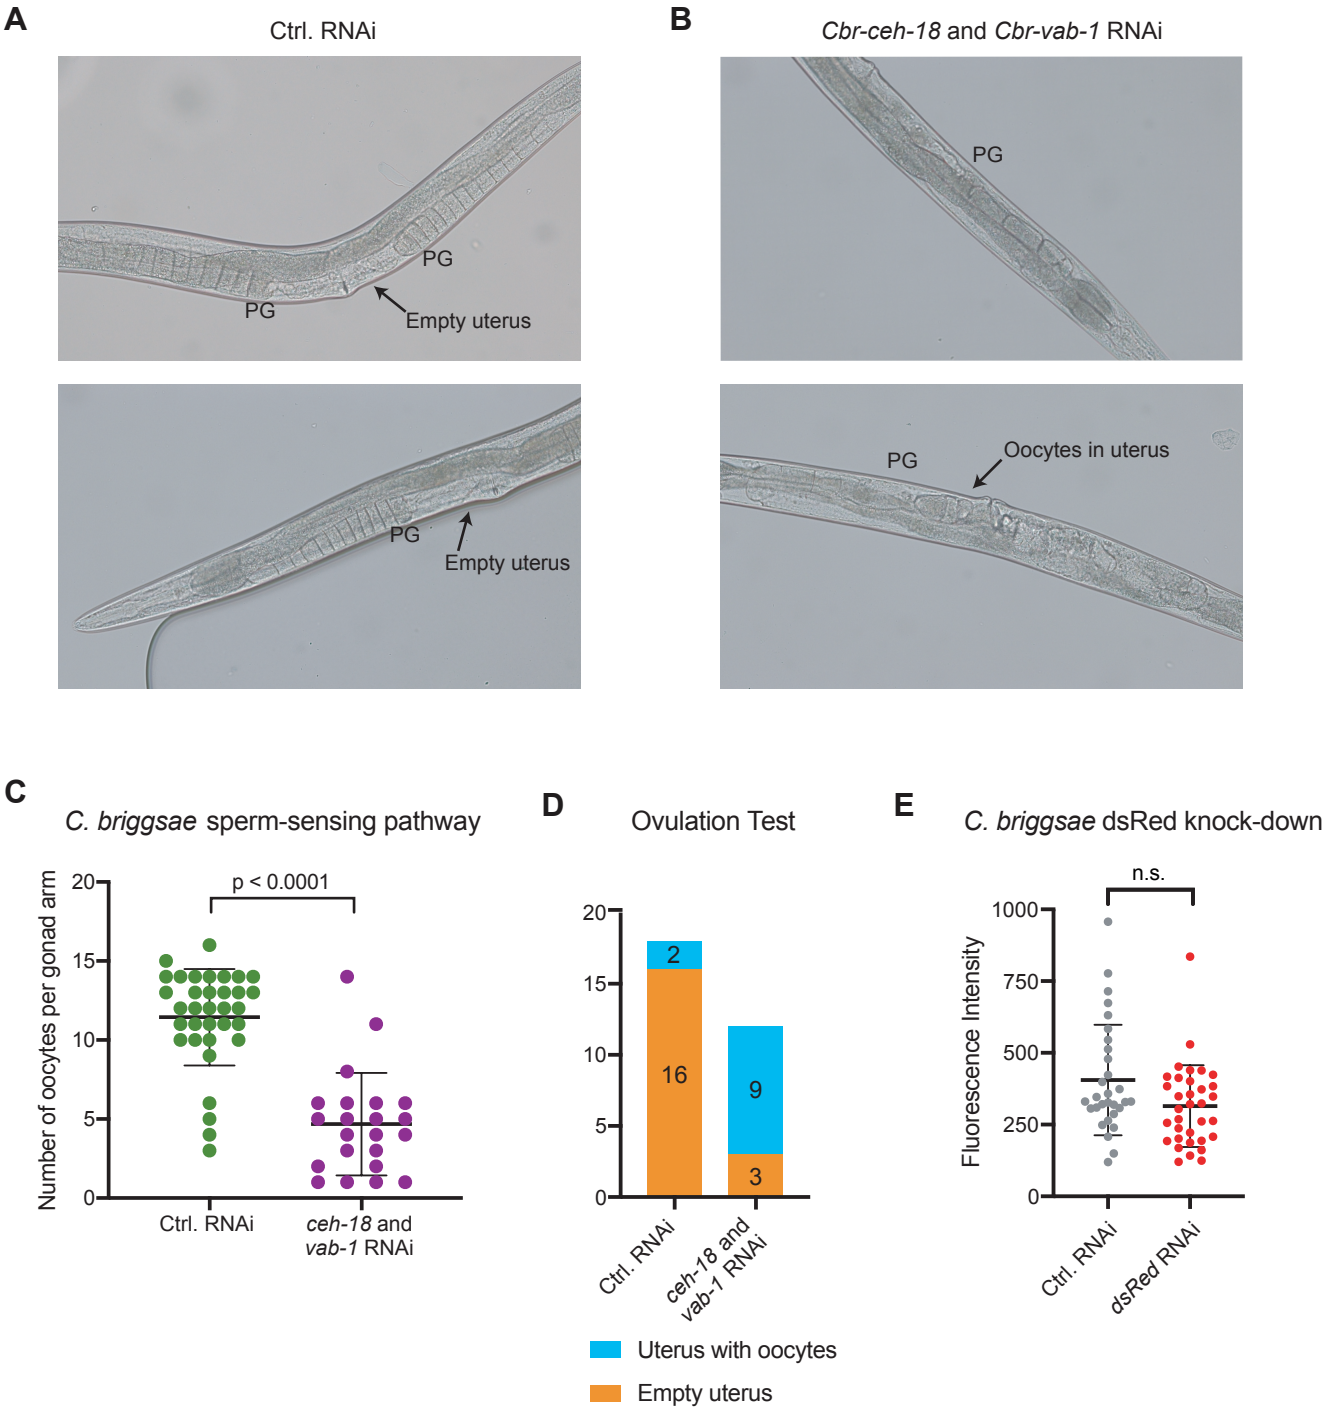

Supplement: supp [file elife-46418-supp-v1.zip]

Figure 5-figure supplement 1

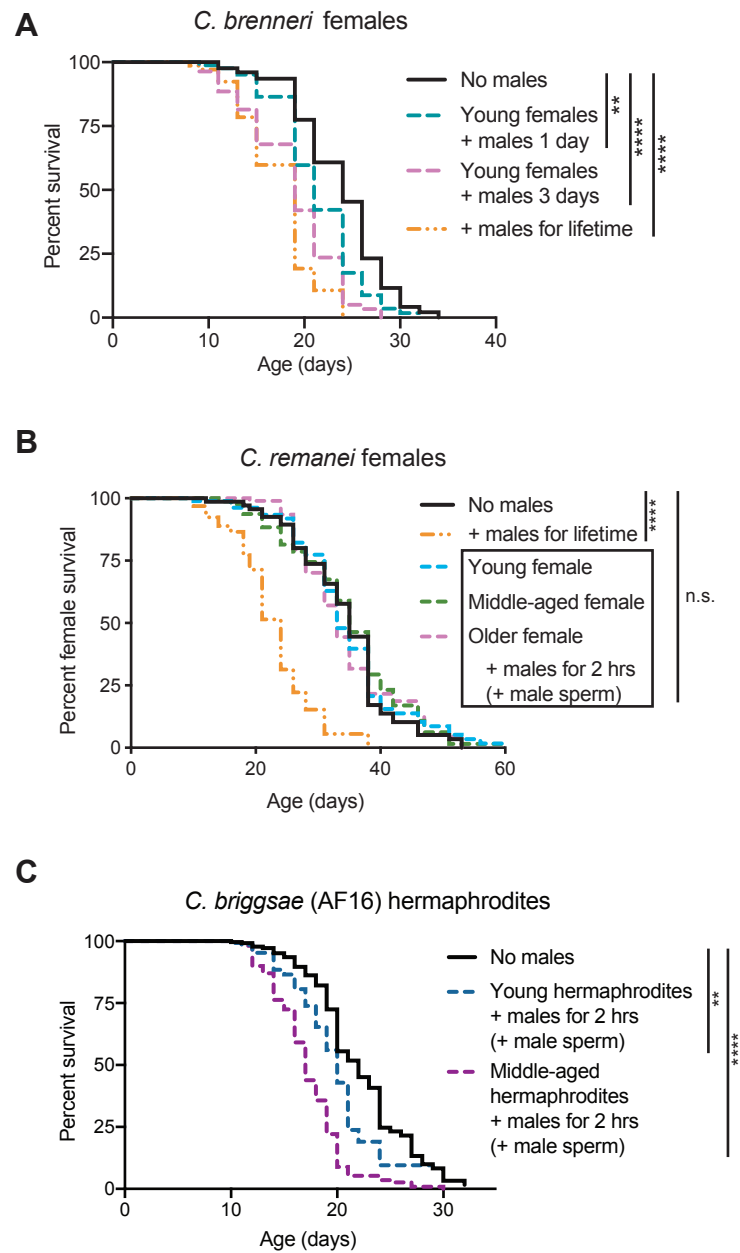

Supplement: supp [file elife-46418-supp-v1.zip]

Figure 2-figure supplement 2

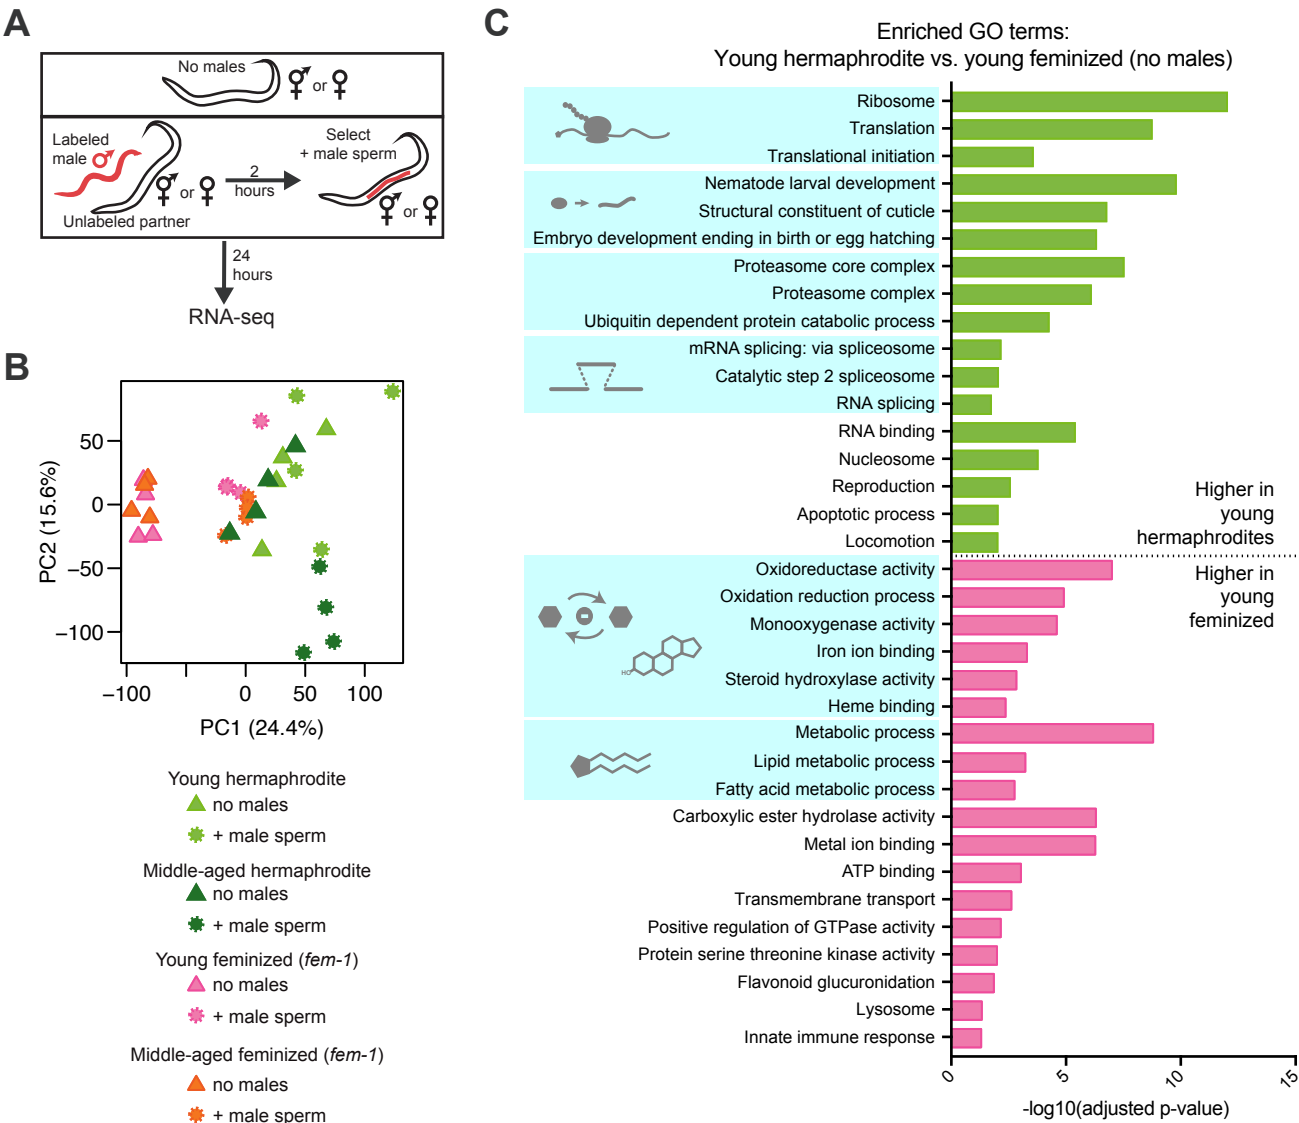

Supplement: supp [file elife-46418-supp-v1.zip]

Figure 5-figure supplement 2

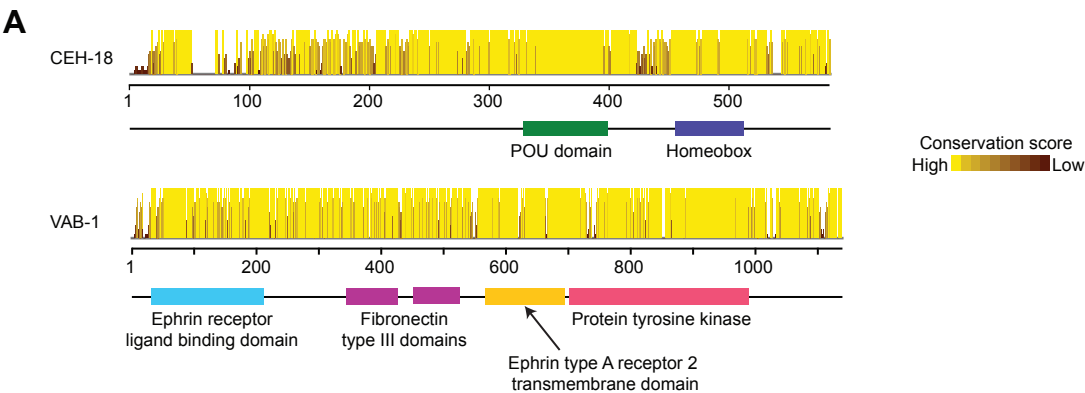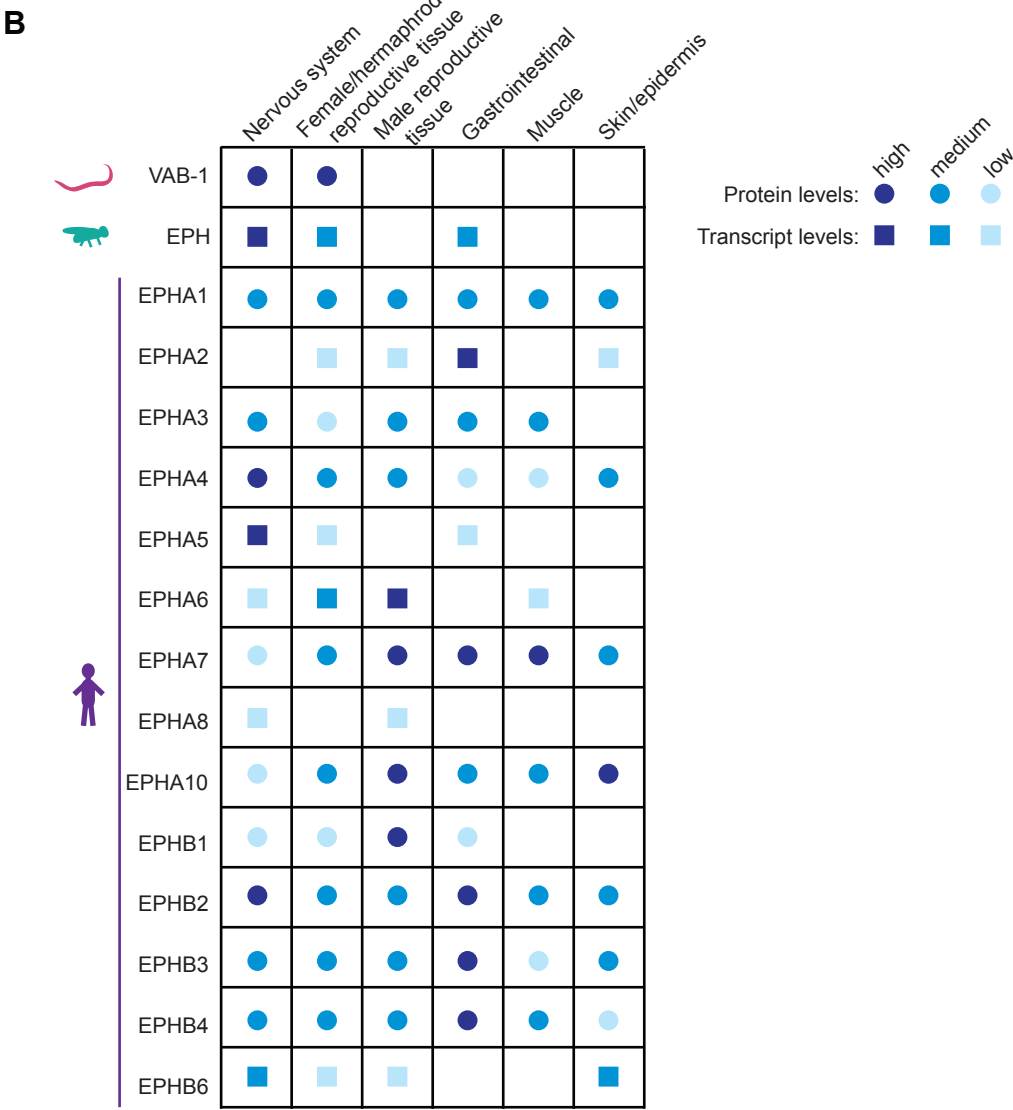

Supplement: supp [file elife-46418-supp-v1.zip]

Figure 4-figure supplement 1

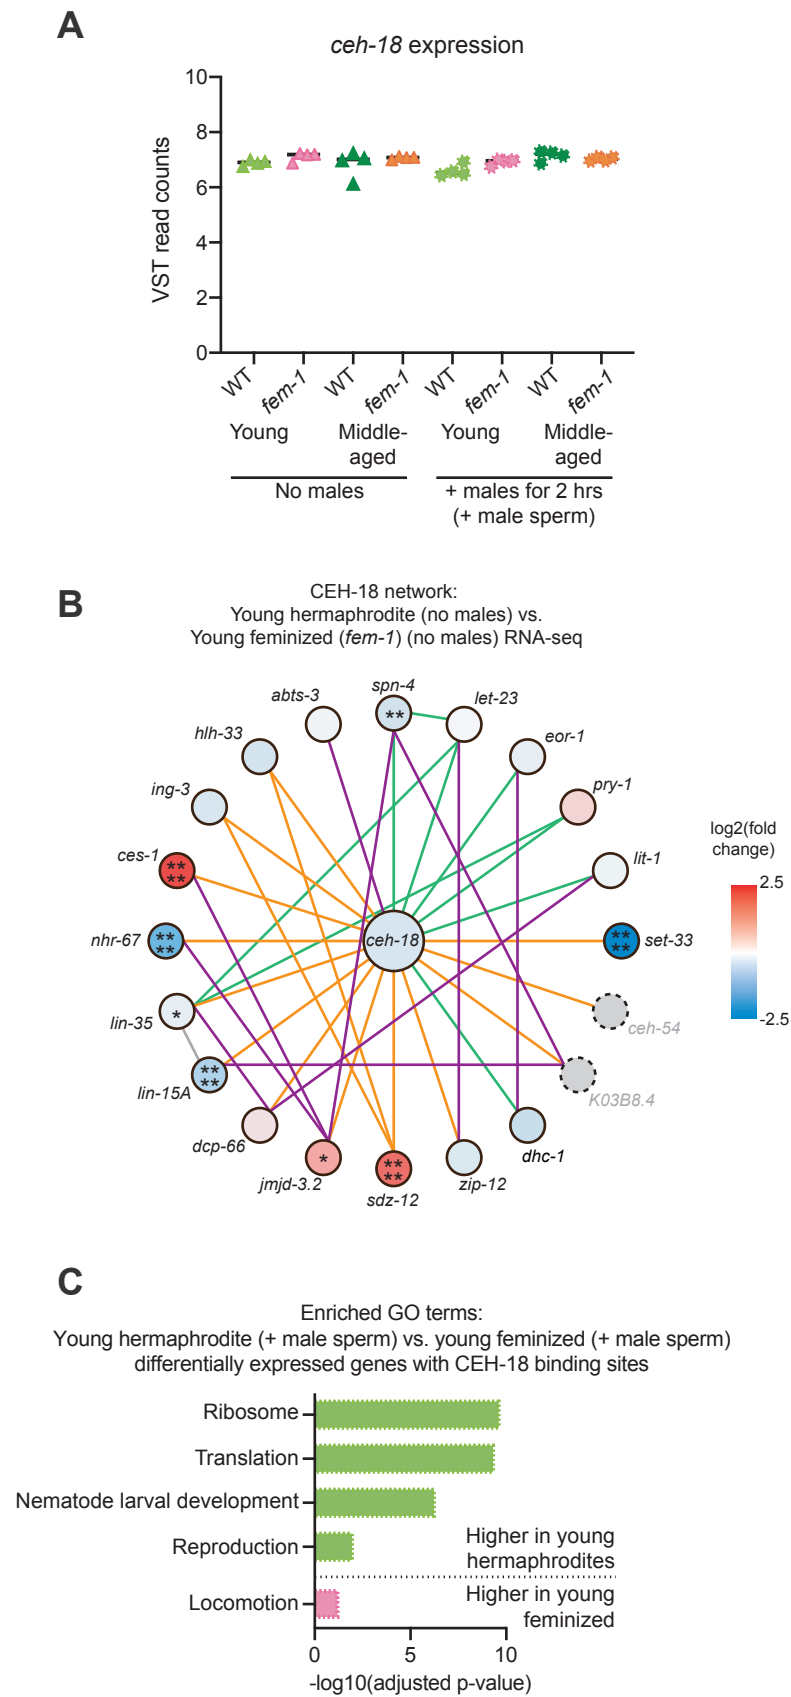

Supplement: supp [file elife-46418-supp-v1.zip]

Figure 3-figure supplement 1

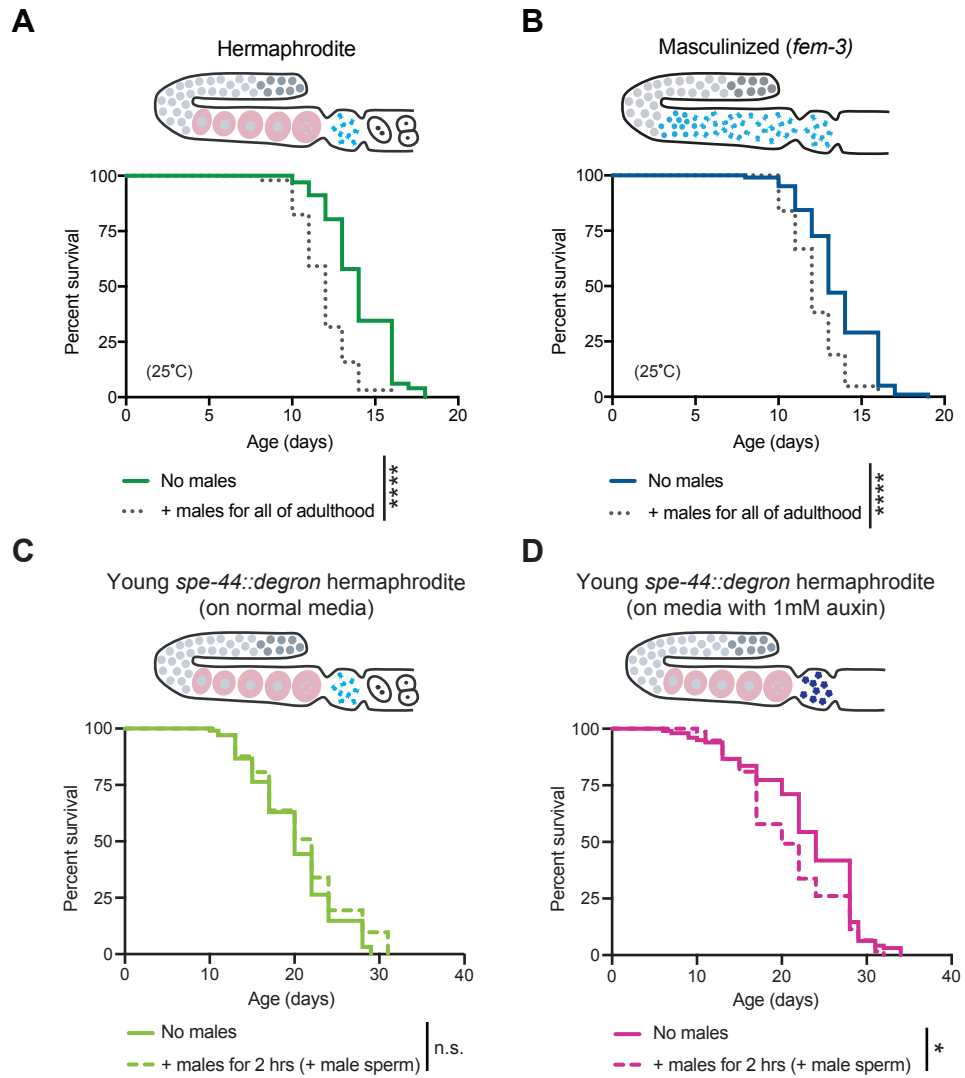

Supplement: supp [file elife-46418-supp-v1.zip]
